# Supplementary material for: Transcript profiles of maize embryo sacs and preliminary identification of genes involved in the embryo sac–pollen tube interaction
Source: Front Plant Sci. 2014 Dec 17;5:702. doi: 10.3389/fpls.2014.00702 (PMC4269116; doi:10.3389/fpls.2014.00702)
Supplement: Supplementary file 6 [file DataSheet6.XLS]

## Sheet: 3
		Additional file 6 809 transcripts specifically expressed in the ESP
TranscriptID	GeneID	Expression expected	Classification	Description	ESPRPKM	GO Component	GO Function	GO Process	Blast nr
GRMZM2G008657_T01	GRMZM2G008657	central cell (balst in Arabidopsis)	not assigned.unknown	weakly similar to ( 107) AT5G52220 | Symbols: | FUNCTIONS IN: molecular_function unknown; INVOLVED IN: biological_process unknown; LOCATED IN: cellular_component unknown; EXPRESSED IN: 18 plant structures; EXPRESSED DURING: 13 growth stages; CONTAINS InterPro DOMAIN/s: Chromosome transmission fidelity protein 8 (InterPro:IPR018607); Has 85 Blast hits to 85 proteins in 45 species: Archae - 0; Bact…	2.10486	-	-	-	gi|242044268|ref|XP_002460005.1|/5.93951e-52/hypothetical protein SORBIDRAFT_02g020730 [Sorghum bicolor]
GRMZM2G015136_T01	GRMZM2G015136	central cell (balst in Arabidopsis))	misc.myrosinases-lectin-jacalin	moderately similar to ( 338) AT5G10530 | Symbols: | lectin protein kinase, putative | chr5:3324978-3326933 REVERSEweakly similar to ( 183) PSKR_DAUCA Phytosulfokine receptor precursor (EC 2.7.11.1) (Phytosulfokine LRR receptor kinase) - Daucus carota (Carrot)moderately similar to ( 457) loc_os12g41540 12012.m07935 protein protein kinase, putative, expressed seq=cds; coord=2:753547..755884:-1; par…	1.63852	GO:0031410//cytoplasmic vesicle	GO:0004672//protein kinase activity;GO:0032559	GO:0006464//cellular protein modification process	gi|293333257|ref|NP_001168437.1|/0/uncharacterized protein LOC100382208 [Zea mays]
GRMZM2G022611_T01	GRMZM2G022611	central cell (balst in Arabidopsis)	not assigned.unknown	weakly similar to ( 133) AT3G62630 | Symbols: | FUNCTIONS IN: molecular_function unknown; INVOLVED IN: biological_process unknown; LOCATED IN: cellular_component unknown; EXPRESSED IN: 22 plant structures; EXPRESSED DURING: 14 growth stages; CONTAINS InterPro DOMAIN/s: Protein of unknown function DUF1645 (InterPro:IPR012442); BEST Arabidopsis thaliana protein match is: calmodulin-binding protein …	3.22462	-	-	-	gi|242041187|ref|XP_002467988.1|/6.40859e-121/hypothetical protein SORBIDRAFT_01g037700 [Sorghum bicolor]
GRMZM2G024476_T01	GRMZM2G024476	central cell (balst in Arabidopsis)	hormone metabolism.cytokinin.synthesis-degradation	highly similar to ( 600) AT1G75450 | Symbols: CKX5, ATCKX5, ATCKX6 | CKX5 (CYTOKININ OXIDASE 5); cytokinin dehydrogenase | chr1:28315248-28318064 REVERSEmoderately similar to ( 418) CKX1_MAIZE Cytokinin dehydrogenase 1 precursor (EC 1.5.99.12) (Cytokinin oxidase 1) (CKO 1) (COX 1) (ZmCKX1) - Zea mays (Maize)highly similar to ( 822) loc_os01g56810 12001.m11838 protein cytokinin dehydrogenase 5 pre…	3.92636	GO:0031410//cytoplasmic vesicle	GO:0030554//adenyl nucleotide binding;GO:0016645//oxidoreductase activity, acting on the CH-NH group of donors	GO:0009690//cytokinin metabolic process;GO:0006091//generation of precursor metabolites and energy	gi|312261197|ref|NP_001185960.1|/0/cytokinin dehydrogenase 4b precursor [Zea mays]
GRMZM2G043600_T01	GRMZM2G043600	central cell (balst in Arabidopsis)	RNA.regulation of transcription.bZIP transcription factor family	weakly similar to ( 193) AT2G21230 | Symbols: | bZIP family transcription factor | chr2:9093920-9096059 REVERSEweakly similar to ( 139) RF2A_ORYSA Transcription factor RF2a - Oryza sativa (Rice)moderately similar to ( 275) loc_os08g43090 12008.m08285 protein DNA binding protein, putative, expressed seq=cds; coord=7:140706875..140710245:1; parent_gene=GRMZM2G043600	1.81748	-	GO:0005488//binding	-	gi|308080008|ref|NP_001183793.1|/4.72633e-151/uncharacterized protein LOC100502386 [Zea mays]
GRMZM2G050485_T01	GRMZM2G050485	central cell (balst in Arabidopsis)	not assigned.unknown	moderately similar to ( 455) AT5G55740 | Symbols: CRR21 | CRR21 (chlororespiratory reduction 21) | chr5:22561941-22564433 REVERSEvery weakly similar to (94.4) RF1_ORYSA Rf1 protein, mitochondrial precursor (PPR protein) (Fertility restorer) (Restorer for CMS) - Oryza sativa (Rice)highly similar to ( 874) loc_os01g42280 12001.m10494 protein selenium-binding protein-like, putative, expressed seq=cd…	1.10673	-	-	-	gi|242053565|ref|XP_002455928.1|/0/hypothetical protein SORBIDRAFT_03g027395 [Sorghum bicolor]
GRMZM2G055678_T01	GRMZM2G055678	central cell (balst in Arabidopsis)	signalling.receptor kinases.proline extensin like	highly similar to ( 573) AT3G24550 | Symbols: ATPERK1 | ATPERK1 (PROLINE EXTENSIN-LIKE RECEPTOR KINASE 1); ATP binding / protein kinase | chr3:8960411-8963303 FORWARDmoderately similar to ( 223) PSKR_DAUCA Phytosulfokine receptor precursor (EC 2.7.11.1) (Phytosulfokine LRR receptor kinase) - Daucus carota (Carrot)highly similar to ( 671) loc_os05g12680 12005.m05731 protein receptor protein kinase…	1.36214	-	GO:0004871//signal transducer activity;GO:0004672//protein kinase activity;GO:0032559	GO:0006464//cellular protein modification process	gi|226508688|ref|NP_001148076.1|/0/LOC100281684 [Zea mays]
GRMZM2G066464_T01	GRMZM2G066464	central cell (balst in Arabidopsis)	not assigned.unknown	weakly similar to ( 183) AT5G13990 | Symbols: ATEXO70C2 | ATEXO70C2 (exocyst subunit EXO70 family protein C2); protein binding | chr5:4514680-4516767 REVERSEmoderately similar to ( 474) loc_os11g06700 12011.m04867 protein protein binding protein, putative, expressed seq=cds; coord=4:215037133..215039373:-1; parent_gene=GRMZM2G066464	1.19661	GO:0043234//protein complex;GO:0043231//intracellular membrane-bounded organelle;GO:0044444//cytoplasmic part	-	GO:0016192//vesicle-mediated transport	gi|242067545|ref|XP_002449049.1|/0/hypothetical protein SORBIDRAFT_05g004020 [Sorghum bicolor]
GRMZM2G091588_T01	GRMZM2G091588	central cell (balst in Arabidopsis)	misc.cytochrome P450	moderately similar to ( 387) AT5G07990 | Symbols: TT7, CYP75B1, D501 | TT7 (TRANSPARENT TESTA 7); flavonoid 3-monooxygenase/ oxygen binding | chr5:2560437-2562859 FORWARDmoderately similar to ( 416) F3PH_PETHY Flavonoid 3-monooxygenase (EC 1.14.13.21) (Flavonoid 3-hydroxylase) (Cytochrome P450 75B2) - Petunia hybrida (Petunia)highly similar to ( 658) loc_os09g26940 12009.m05846 protein flavonoid …	1.24177	GO:0031410//cytoplasmic vesicle	GO:0016491//oxidoreductase activity;GO:0005506//iron ion binding	GO:0008152//metabolic process	gi|18377404|gb|AAL66767.1|/0/cytochrome P450 monooxygenase CYP92A1 [Zea mays subsp. mays]
GRMZM2G117250_T01	GRMZM2G117250	central cell (balst in Arabidopsis)	signalling.receptor kinases.S-locus glycoprotein like	highly similar to ( 660) AT2G19130 | Symbols: | S-locus lectin protein kinase family protein | chr2:8293789-8296275 FORWARDmoderately similar to ( 265) KPRO_MAIZE Putative receptor protein kinase ZmPK1 precursor (EC 2.7.11.1) - Zea mays (Maize)highly similar to ( 650) loc_os07g36780 12007.m07928 protein serine/threonine-protein kinase receptor precursor, putative, expressed seq=cds; coord=1:19933…	2.0401	GO:0044464//cell part	GO:0004672//protein kinase activity;GO:0000166//nucleotide binding	GO:0009987//cellular process	gi|357140499|ref|XP_003571804.1|/0/PREDICTED: G-type lectin S-receptor-like serine/threonine-protein kinase At2g19130-like [Brachypodium distachyon]
GRMZM2G123540_T02	GRMZM2G123540	central cell (balst in Arabidopsis)	hormone metabolism.abscisic acid.signal transduction	moderately similar to ( 323) AT3G08550 | Symbols: ELD1, ABI8, KOB1 | KOB1 (KOBITO) | chr3:2596513-2599515 FORWARDmoderately similar to ( 454) loc_os01g13200 12001.m07930 protein KOB1, putative, expressed seq=cds; coord=3:1721270..1724245:1; parent_gene=GRMZM2G123540	1.44424	-	-	-	gi|226500302|ref|NP_001151449.1|/8.6747e-140/KOB1 [Zea mays]
GRMZM2G125482_T01	GRMZM2G125482	central cell (balst in Arabidopsis)	misc.cytochrome P450	moderately similar to ( 397) AT5G07990 | Symbols: TT7, CYP75B1, D501 | TT7 (TRANSPARENT TESTA 7); flavonoid 3-monooxygenase/ oxygen binding | chr5:2560437-2562859 FORWARDmoderately similar to ( 405) F3PH_PETHY Flavonoid 3-monooxygenase (EC 1.14.13.21) (Flavonoid 3-hydroxylase) (Cytochrome P450 75B2) - Petunia hybrida (Petunia)highly similar to ( 893) loc_os09g26960 12009.m05848 protein flavonoid …	536.86	GO:0031410//cytoplasmic vesicle	GO:0016491//oxidoreductase activity;GO:0005506//iron ion binding	GO:0008152//metabolic process	gi|226502604|ref|NP_001147572.1|/0/flavonoid 3-monooxygenase [Zea mays]
GRMZM2G136410_T01	GRMZM2G136410	central cell (balst in Arabidopsis)	protein.postranslational modification	highly similar to ( 594) AT4G18700 | Symbols: CIPK12, SnRK3.9, ATWL4, WL4 | CIPK12 (CBL-INTERACTING PROTEIN KINASE 12); ATP binding / kinase/ protein kinase/ protein serine/threonine kinase | chr4:10289110-10290579 REVERSEmoderately similar to ( 338) CIPK1_ORYSA CIPK-like protein 1 (EC 2.7.11.1) (OsCK1) - Oryza sativa (Rice)highly similar to ( 677) loc_os05g43840 12005.m08510 protein CBL-interact…	1.33082	-	GO:0004672//protein kinase activity;GO:0032559	GO:0006464//cellular protein modification process;GO:0023060	gi|229609769|gb|ACQ83500.1|/0/CBL-interacting protein kinase 12 [Sorghum bicolor]
GRMZM2G147687_T01	GRMZM2G147687	central cell (balst in Arabidopsis)	cell wall.degradation.cellulases and beta -1,4-glucanases	highly similar to ( 924) AT5G20950 | Symbols: | glycosyl hydrolase family 3 protein | chr5:7107609-7110775 REVERSEnearly identical (1088) loc_os03g53800 12003.m101132 protein periplasmic beta-glucosidase precursor, putative, expressed seq=cds; coord=1:276305013..276310701:1; parent_gene=GRMZM2G147687	2.64838	GO:0031410//cytoplasmic vesicle	GO:0015926//glucosidase activity	GO:0044238//primary metabolic process	gi|212274863|ref|NP_001130296.1|/0/exoglucanase1 precursor [Zea mays]
GRMZM2G150907_T01	GRMZM2G150907	central cell (balst in Arabidopsis)	misc.cytochrome P450	moderately similar to ( 476) AT2G46950 | Symbols: CYP709B2 | CYP709B2; electron carrier/ heme binding / iron ion binding / monooxygenase/ oxygen binding | chr2:19289466-19291541 REVERSEmoderately similar to ( 345) C72A1_CATRO Cytochrome P450 72A1 (EC 1.3.3.9) (CYPLXXII) (Secologanin synthase) (SLS) - Catharanthus roseus (Rosy periwinkle) (Madagascar periwinkle)highly similar to ( 716) loc_os07g23…	10.2946	GO:0031410//cytoplasmic vesicle	GO:0016491//oxidoreductase activity;GO:0005506//iron ion binding	GO:0008152//metabolic process	gi|226499842|ref|NP_001140247.1|/0/uncharacterized protein LOC100272288 [Zea mays]
GRMZM2G155491_T01	GRMZM2G155491	central cell (balst in Arabidopsis)	transport.amino acids	highly similar to ( 537) AT5G23810 | Symbols: AAP7 | AAP7; amino acid transmembrane transporter | chr5:8028461-8030138 FORWARDhighly similar to ( 704) loc_os04g39489 12004.m35579 protein AAP7, putative, expressed seq=cds; coord=2:39327335..39330173:1; parent_gene=GRMZM2G155491	1.27826	GO:0031224//intrinsic to membrane	GO:0022804	GO:0015837//amine transport	gi|223947333|gb|ACN27750.1|/0/unknown [Zea mays]
GRMZM2G176131_T01	GRMZM2G176131	central cell (balst in Arabidopsis)	cell.organisation	weakly similar to ( 170) AT2G29550 | Symbols: TUB7 | TUB7; structural constituent of cytoskeleton | chr2:12644258-12645932 REVERSEweakly similar to ( 180) TBB7_MAIZE Tubulin beta-7 chain (Beta-7 tubulin) - Zea mays (Maize)weakly similar to ( 179) loc_os02g07060 12002.m06053 protein tubulin beta-5 chain, putative, expressed seq=cds; coord=1:8221636..8222451:-1; parent_gene=GRMZM2G176131	1.17367	GO:0032991//macromolecular complex;GO:0015630//microtubule cytoskeleton	GO:0032561//guanyl ribonucleotide binding;GO:0017111//nucleoside-triphosphatase activity	GO:0043623//cellular protein complex assembly;GO:0007017//microtubule-based process	gi|162460038|ref|NP_001105688.1|/1.84806e-45/tubulin beta-7 chain [Zea mays]
GRMZM2G305146_T01	GRMZM2G305146	central cell (balst in Arabidopsis)	misc.UDP glucosyl and glucoronyl transferases	moderately similar to ( 395) AT5G62220 | Symbols: | exostosin family protein | chr5:24988456-24990009 REVERSEmoderately similar to ( 265) KATAM_ORYSA Xyloglucan galactosyltransferase KATAMARI1 homolog (EC 2.4.1.-) - Oryza sativa (Rice)highly similar to ( 678) loc_os06g23420 12006.m06994 protein xyloglucan galactosyltransferase KATAMARI 1, putative, expressed seq=cds; coord=10:136245381..136247528…	1.06544	GO:0043231//intracellular membrane-bounded organelle	-	-	gi|242076862|ref|XP_002448367.1|/0/hypothetical protein SORBIDRAFT_06g026010 [Sorghum bicolor]
GRMZM2G316778_T01	GRMZM2G316778	central cell (balst in Arabidopsis)	not assigned.unknown	moderately similar to ( 337) AT1G64980 | Symbols: | unknown protein | chr1:24137840-24138619 REVERSEmoderately similar to ( 423) loc_os07g23120 12007.m29140 protein expressed protein seq=cds; coord=4:174042012..174044874:-1; parent_gene=GRMZM2G316778	1.67257	-	GO:0016746//transferase activity, transferring acyl groups	-	gi|242066816|ref|XP_002454697.1|/0/hypothetical protein SORBIDRAFT_04g035790 [Sorghum bicolor]
GRMZM2G329002_T02	GRMZM2G329002	central cell (balst in Arabidopsis)	cell wall.pectin*esterases.acetyl esterase	weakly similar to ( 144) AT3G62060 | Symbols: | pectinacetylesterase family protein | chr3:22980123-22982734 FORWARDweakly similar to ( 183) loc_os01g66850 12001.m43520 protein carboxylic ester hydrolase, putative, expressed seq=cds; coord=3:169043936..169045205:1; parent_gene=GRMZM2G329002	3.20382	GO:0031410//cytoplasmic vesicle;GO:0043231//intracellular membrane-bounded organelle	-	-	gi|242059513|ref|XP_002458902.1|/8.30783e-65/hypothetical protein SORBIDRAFT_03g042380 [Sorghum bicolor]
GRMZM2G410865_T01	GRMZM2G410865	central cell (balst in Arabidopsis)	secondary metabolism.flavonoids.dihydroflavonols	moderately similar to ( 248) AT5G58490 | Symbols: | cinnamoyl-CoA reductase family | chr5:23643068-23644455 FORWARDweakly similar to ( 143) DFRA_DIACA Dihydroflavonol-4-reductase (EC 1.1.1.219) (DFR) (Dihydrokaempferol 4-reductase) - Dianthus caryophyllus (Carnation) (Clove pink)moderately similar to ( 261) loc_os03g60380 12003.m10928 protein dihydroflavonol-4-reductase, putative, expressed seq=c…	1.71897	-	GO:0005488//binding	GO:0008152//metabolic process	gi|242037623|ref|XP_002466206.1|/4.89948e-85/hypothetical protein SORBIDRAFT_01g003480 [Sorghum bicolor]
GRMZM2G418635_T01	GRMZM2G418635	central cell (balst in Arabidopsis)	cell wall.pectin*esterases.acetyl esterase	moderately similar to ( 259) AT3G09410 | Symbols: | pectinacetylesterase family protein | chr3:2898243-2900984 REVERSEmoderately similar to ( 346) loc_os01g66850 12001.m43520 protein carboxylic ester hydrolase, putative, expressed seq=cds; coord=8:164550604..164554464:1; parent_gene=GRMZM2G418635	1.39655	GO:0031410//cytoplasmic vesicle	-	-	gi|357118832|ref|XP_003561153.1|/2.60862e-95/PREDICTED: protein notum homolog [Brachypodium distachyon]
GRMZM2G423930_T01	GRMZM2G423930	central cell (balst in Arabidopsis)	misc.UDP glucosyl and glucoronyl transferases	moderately similar to ( 367) AT2G22900 | Symbols: | galactosyl transferase GMA12/MNN10 family protein | chr2:9744359-9746193 REVERSEhighly similar to ( 510) loc_os11g34390 12011.m07297 protein glycosyltransferase 6, putative, expressed seq=cds; coord=4:191038909..191040293:1; parent_gene=GRMZM2G423930	1.52128	GO:0031224//intrinsic to membrane;GO:0043231//intracellular membrane-bounded organelle	GO:0016757//transferase activity, transferring glycosyl groups	-	gi|242068743|ref|XP_002449648.1|/1.08725e-159/hypothetical protein SORBIDRAFT_05g020910 [Sorghum bicolor]
GRMZM2G443091_T01	GRMZM2G443091	central cell (balst in Arabidopsis)	not assigned.unknown	weakly similar to ( 120) AT2G33220 | Symbols: | FUNCTIONS IN: molecular_function unknown; INVOLVED IN: photorespiration; LOCATED IN: mitochondrion, mitochondrial membrane, plastid, respiratory chain complex I; EXPRESSED IN: 25 plant structures; EXPRESSED DURING: 15 growth stages; CONTAINS InterPro DOMAIN/s: GRIM-19 (InterPro:IPR009346); BEST Arabidopsis thaliana protein match is: MEE4 (maternal e…	1.17872	GO:0030964;GO:0005746//mitochondrial respiratory chain	GO:0016651//oxidoreductase activity, acting on NADH or NADPH	GO:0043094;GO:0003006//developmental process involved in reproduction	gi|226498244|ref|NP_001148415.1|/1.34961e-34/NADH-ubiquinone oxidoreductase B16.6 subunit [Zea mays]
GRMZM2G443509_T01	GRMZM2G443509	central cell (balst in Arabidopsis)	protein.postranslational modification	moderately similar to ( 467) AT3G16560 | Symbols: | protein phosphatase 2C-related / PP2C-related | chr3:5636051-5637702 REVERSEhighly similar to ( 792) loc_os04g33080 12004.m08403 protein protein phosphatase 2C containing protein, expressed seq=cds; coord=10:113162222..113169068:-1; parent_gene=GRMZM2G443509	1.01653	-	GO:0003824//catalytic activity	-	gi|223945715|gb|ACN26941.1|/0/unknown [Zea mays]
GRMZM2G456401_T01	GRMZM2G456401	central cell (balst in Arabidopsis)	not assigned.unknown	moderately similar to ( 322) AT3G02650 | Symbols: | pentatricopeptide (PPR) repeat-containing protein | chr3:566271-569865 FORWARDhighly similar to ( 628) loc_os03g39520 12003.m09036 protein conserved hypothetical protein seq=cds; coord=1:79321854..79323545:-1; parent_gene=GRMZM2G456401	1.78014	-	-	-	gi|242035323|ref|XP_002465056.1|/0/hypothetical protein SORBIDRAFT_01g031420 [Sorghum bicolor]
GRMZM2G475293_T02	GRMZM2G475293	central cell (balst in Arabidopsis)	not assigned.unknown	moderately similar to ( 273) AT2G38740 | Symbols: | haloacid dehalogenase-like hydrolase family protein | chr2:16194639-16195995 REVERSEmoderately similar to ( 416) loc_os09g24230 12009.m05579 protein catalytic/ hydrolase, putative, expressed seq=cds; coord=9:26817670..26820021:1; parent_gene=GRMZM2G475293	1.49113	-	GO:0016787//hydrolase activity	-	gi|194698904|gb|ACF83536.1|/7.56366e-132/unknown [Zea mays]
GRMZM2G475293_T03	GRMZM2G475293	central cell (balst in Arabidopsis)	not assigned.unknown	moderately similar to ( 213) AT2G38740 | Symbols: | haloacid dehalogenase-like hydrolase family protein | chr2:16194639-16195995 REVERSEmoderately similar to ( 336) loc_os06g01990 12006.m04935 protein phosphoglycolate phosphatase, plasmid, putative, expressed seq=cds; coord=9:26820177..26821592:1; parent_gene=GRMZM2G475293	2.69109	-	GO:0003824//catalytic activity	-	gi|212276068|ref|NP_001130587.1|/1.97541e-130/uncharacterized protein LOC100191686 [Zea mays]
GRMZM2G475293_T04	GRMZM2G475293	central cell (balst in Arabidopsis)	not assigned.unknown	moderately similar to ( 213) AT2G38740 | Symbols: | haloacid dehalogenase-like hydrolase family protein | chr2:16194639-16195995 REVERSEmoderately similar to ( 336) loc_os06g01990 12006.m04935 protein phosphoglycolate phosphatase, plasmid, putative, expressed seq=cds; coord=9:26820177..26821592:1; parent_gene=GRMZM2G475293	1.26954	-	GO:0003824//catalytic activity	-	gi|223944323|gb|ACN26245.1|/3.71201e-129/unknown [Zea mays]
GRMZM5G860235_T01	GRMZM5G860235	central cell (balst in Arabidopsis)	not assigned.unknown	highly similar to ( 659) AT1G05590 | Symbols: HEXO2, ATHEX3 | HEXO2 (BETA-HEXOSAMINIDASE 2); beta-N-acetylhexosaminidase/ hexosaminidase/ hydrolase, hydrolyzing O-glycosyl compounds | chr1:1669871-1671686 FORWARDhighly similar to ( 910) loc_os07g38790 12007.m08124 protein beta-hexosaminidase precursor, putative, expressed seq=cds; coord=7:160082348..160084400:-1; parent_gene=GRMZM5G860235	1.19279	GO:0016020//membrane;GO:0031410//cytoplasmic vesicle	GO:0008194//UDP-glycosyltransferase activity;GO:0043167//ion binding;GO:0015929//hexosaminidase activity	GO:0044238//primary metabolic process	gi|226497390|ref|NP_001147095.1|/0/beta-hexosaminidase precursor [Zea mays]
GRMZM2G010488_T01	GRMZM2G010488	egg (balst in Arabidopsis)	protein.postranslational modification.kinase.receptor like cytoplasmatic kinase IX	moderately similar to ( 454) AT2G45910 | Symbols: | protein kinase family protein / U-box domain-containing protein | chr2:18894520-18898212 FORWARDweakly similar to ( 126) CRI4_MAIZE Putative receptor protein kinase CRINKLY4 precursor (EC 2.7.11.1) - Zea mays (Maize)highly similar to ( 654) loc_os10g40100 12010.m21803 protein protein kinase, putative, expressed seq=cds; coord=4:153518736..153522…	1.62804	GO:0044424//intracellular part	GO:0004672//protein kinase activity;GO:0000166//nucleotide binding	GO:0006464//cellular protein modification process	gi|125540597|gb|EAY86992.1|/0/hypothetical protein OsI_08386 [Oryza sativa Indica Group]
GRMZM2G015972_T04	GRMZM2G015972	egg (balst in Arabidopsis)	cell.organisation	moderately similar to ( 267) AT1G60430 | Symbols: ARPC3 | ARPC3 (actin-related protein C3); structural molecule | chr1:22264797-22265682 REVERSEmoderately similar to ( 286) loc_os02g14000 12002.m34005 protein actin-related protein 2/3 complex subunit 3, putative, expressed seq=cds; coord=5:146917971..146922336:-1; parent_gene=GRMZM2G015972	3.11841	GO:0043232;GO:0031410//cytoplasmic vesicle	GO:0016682//oxidoreductase activity, acting on diphenols and related substances as donors, oxygen as acceptor;GO:0046914//transition metal ion binding	GO:0008064//regulation of actin polymerization or depolymerization;GO:0008152//metabolic process	gi|283771380|gb|ADB28926.1|/3.61662e-109/multicopper oxidase protein [Zea mays subsp. mays]
GRMZM2G018108_T01	GRMZM2G018108	egg (balst in Arabidopsis)	RNA.regulation of transcription.unclassified	moderately similar to ( 349) AT5G10770 | Symbols: | chloroplast nucleoid DNA-binding protein, putative | chr5:3403331-3405331 REVERSEvery weakly similar to (89.7) ASP1_ORYSA Aspartic proteinase Asp1 precursor (EC 3.4.23.-) (OsAsp1) (OSAP1) (Nucellin-like protein) - Oryza sativa (Rice)highly similar to ( 509) loc_os09g30414 12009.m06195 protein aspartic proteinase nepenthesin-2 precursor, putative…	4.62517	-	-	-	gi|226504334|ref|NP_001141706.1|/0/uncharacterized protein LOC100273835 precursor [Zea mays]
GRMZM2G023813_T01	GRMZM2G023813	egg (balst in Arabidopsis)	RNA.regulation of transcription.ARF, Auxin Response Factor family	moderately similar to ( 227) AT1G77850 | Symbols: ARF17 | ARF17 (AUXIN RESPONSE FACTOR 17); transcription factor | chr1:29272405-29275193 FORWARDmoderately similar to ( 318) loc_os04g59430 12004.m10819 protein B3 DNA binding domain containing protein, expressed seq=cds; coord=10:149197770..149199623:-1; parent_gene=GRMZM2G023813	7.24124	GO:0043231//intracellular membrane-bounded organelle	GO:0003676//nucleic acid binding	GO:0009719;GO:0010468//regulation of gene expression;GO:0006351//transcription, DNA-dependent	gi|226500250|ref|NP_001149486.1|/0/B3 DNA binding domain containing protein [Zea mays]
GRMZM2G027991_T01	GRMZM2G027991	egg (balst in Arabidopsis)	not assigned.unknown	weakly similar to ( 199) AT1G71850 | Symbols: | ubiquitin thiolesterase | chr1:27024875-27026287 REVERSEhighly similar to ( 520) loc_os03g44430 12003.m09482 protein expressed protein seq=cds; coord=1:250862854..250866463:1; parent_gene=GRMZM2G027991	1.40324	GO:0043231//intracellular membrane-bounded organelle	-	-	gi|238013424|gb|ACR37747.1|/5.86385e-163/unknown [Zea mays]
GRMZM2G038598_T06	GRMZM2G038598	egg (balst in Arabidopsis)	cell wall.precursor synthesis.UGE	very weakly similar to (98.2) AT4G23920 | Symbols: UGE2 | UGE2 (UDP-D-glucose/UDP-D-galactose 4-epimerase 2); UDP-glucose 4-epimerase/ protein dimerization | chr4:12431416-12433666 FORWARDweakly similar to ( 124) loc_os05g51670 12005.m27995 protein UDP-glucose 4-epimerase GEPI48, putative, expressed seq=cds; coord=1:59956283..59958133:1; parent_gene=GRMZM2G038598	1.04212	-	GO:0048037//cofactor binding;GO:0016857//racemase and epimerase activity, acting on carbohydrates and derivatives	GO:0019318//hexose metabolic process	gi|308080804|ref|NP_001182829.1|/2.65929e-38/uncharacterized protein LOC100501069 [Zea mays]
GRMZM2G041899_T01	GRMZM2G041899	egg (balst in Arabidopsis)	protein.degradation.ubiquitin.E3.RING	moderately similar to ( 325) AT5G60710 | Symbols: | zinc finger (C3HC4-type RING finger) family protein | chr5:24410953-24414849 REVERSEmoderately similar to ( 396) loc_os10g32750 12010.m06111 protein protein binding protein, putative seq=cds; coord=1:9122820..9125373:1; parent_gene=GRMZM2G041899	3.08	-	GO:0005488//binding	-	gi|242042271|ref|XP_002468530.1|/2.24085e-174/hypothetical protein SORBIDRAFT_01g047470 [Sorghum bicolor]
GRMZM2G043301_T01	GRMZM2G043301	egg (balst in Arabidopsis)	misc.oxidases - copper, flavone etc.	highly similar to ( 553) AT5G66920 | Symbols: sks17 | sks17 (SKU5 Similar 17); copper ion binding / oxidoreductase | chr5:26722963-26725370 FORWARDmoderately similar to ( 471) NTP3_TOBAC Pollen-specific protein NTP303 precursor - Nicotiana tabacum (Common tobacco)highly similar to ( 725) loc_os07g02810 12007.m04753 protein L-ascorbate oxidase homolog precursor, putative, expressed seq=cds; coord=…	1.47141	GO:0031410//cytoplasmic vesicle;GO:0005618//cell wall	-	-	gi|223947195|gb|ACN27681.1|/0/unknown [Zea mays]
GRMZM2G056407_T01	GRMZM2G056407	egg (balst in Arabidopsis)	RNA.regulation of transcription.MYB domain transcription factor family	moderately similar to ( 270) AT3G28910 | Symbols: ATMYB30, MYB30 | MYB30 (MYB DOMAIN PROTEIN 30); DNA binding / transcription factor | chr3:10911443-10912856 FORWARDweakly similar to ( 193) MYB4_ORYSA Myb-related protein Myb4 (OsMyb4) (Transcription factor RLTR1) - Oryza sativa (Rice)moderately similar to ( 353) loc_os07g43580 12007.m08585 protein MYB94, putative, expressed seq=cds; coord=7:16760…	1.11168	GO:0043231//intracellular membrane-bounded organelle	GO:0003676//nucleic acid binding	GO:0010468//regulation of gene expression	gi|194707064|gb|ACF87616.1|/1.64766e-139/unknown [Zea mays]
GRMZM2G094602_T02	GRMZM2G094602	egg (balst in Arabidopsis)	protein.degradation.ubiquitin.E3.RING	highly similar to ( 575) AT5G60710 | Symbols: | zinc finger (C3HC4-type RING finger) family protein | chr5:24410953-24414849 REVERSEhighly similar to ( 969) loc_os02g40664 12002.m09152 protein protein binding protein, putative, expressed seq=cds; coord=5:185571711..185577146:-1; parent_gene=GRMZM2G094602	1.90319	-	GO:0046914//transition metal ion binding	-	gi|226504618|ref|NP_001148048.1|/0/protein binding protein [Zea mays]
GRMZM2G111975_T01	GRMZM2G111975	egg (balst in Arabidopsis)	protein.glycosylation	moderately similar to ( 236) AT1G08280 | Symbols: | glycosyl transferase family 29 protein / sialyltransferase family protein | chr1:2608408-2609604 FORWARDmoderately similar to ( 419) loc_os04g42760 12004.m09241 protein sialyltransferase-like protein, putative, expressed seq=cds; coord=2:30398686..30399959:1; parent_gene=GRMZM2G111975	15.4858	GO:0043231//intracellular membrane-bounded organelle;GO:0031410//cytoplasmic vesicle	GO:0016757//transferase activity, transferring glycosyl groups	-	gi|242073646|ref|XP_002446759.1|/5.55678e-139/hypothetical protein SORBIDRAFT_06g021930 [Sorghum bicolor]
GRMZM2G316136_T02	GRMZM2G316136	egg (balst in Arabidopsis)	protein.postranslational modification	moderately similar to ( 453) AT5G58380 | Symbols: CIPK10, PKS2, SIP1, SNRK3.8 | SIP1 (SOS3-INTERACTING PROTEIN 1); ATP binding / kinase/ protein kinase/ protein serine/threonine kinase | chr5:23597092-23598531 REVERSEmoderately similar to ( 372) CIPK1_ORYSA CIPK-like protein 1 (EC 2.7.11.1) (OsCK1) - Oryza sativa (Rice)highly similar to ( 567) loc_os07g48100 12007.m09025 protein CBL-interacting s…	1.19141	-	GO:0004672//protein kinase activity;GO:0032559	GO:0006464//cellular protein modification process;GO:0023060	gi|226499662|ref|NP_001148053.1|/0/CBL-interacting serine/threonine-protein kinase 15 [Zea mays]
GRMZM2G330684_T01	GRMZM2G330684	egg (balst in Arabidopsis)	protein.degradation.ubiquitin.E3.RING	moderately similar to ( 459) AT5G60710 | Symbols: | zinc finger (C3HC4-type RING finger) family protein | chr5:24410953-24414849 REVERSEhighly similar to ( 639) loc_os10g32740 12010.m06110 protein protein binding protein, putative, expressed seq=cds; coord=5:30836734..30840238:1; parent_gene=GRMZM2G330684	1.05533	GO:0043231//intracellular membrane-bounded organelle	GO:0046914//transition metal ion binding	-	gi|242034241|ref|XP_002464515.1|/0/hypothetical protein SORBIDRAFT_01g019910 [Sorghum bicolor]
GRMZM2G406601_T01	GRMZM2G406601	egg (balst in Arabidopsis)	signalling.receptor kinases.DUF 26	moderately similar to ( 227) AT1G34300 | Symbols: | lectin protein kinase family protein | chr1:12503450-12505939 FORWARDweakly similar to ( 160) KPRO_MAIZE Putative receptor protein kinase ZmPK1 precursor (EC 2.7.11.1) - Zea mays (Maize)moderately similar to ( 471) loc_os07g04810 12007.m04948 protein receptor-like kinase ARK1AS, putative, expressed seq=cds; coord=1:15491758..15493149:-1; parent_…	2.33767	GO:0043231//intracellular membrane-bounded organelle;GO:0031410//cytoplasmic vesicle	GO:0004672//protein kinase activity;GO:0032559	GO:0006464//cellular protein modification process	gi|242036761|ref|XP_002465775.1|/0/hypothetical protein SORBIDRAFT_01g045620 [Sorghum bicolor]
GRMZM2G414503_T01	GRMZM2G414503	egg (balst in Arabidopsis)	protein.glycosylation	moderately similar to ( 219) AT1G08280 | Symbols: | glycosyl transferase family 29 protein / sialyltransferase family protein | chr1:2608408-2609604 FORWARDmoderately similar to ( 386) loc_os04g42760 12004.m09241 protein sialyltransferase-like protein, putative, expressed seq=cds; coord=10:129204782..129206240:1; parent_gene=GRMZM2G414503	1.5754	GO:0031410//cytoplasmic vesicle	GO:0016740//transferase activity	-	gi|242073646|ref|XP_002446759.1|/1.81468e-128/hypothetical protein SORBIDRAFT_06g021930 [Sorghum bicolor]
GRMZM2G452016_T02	GRMZM2G452016	egg (balst in Arabidopsis)	protein.degradation.ubiquitin.E3.RING	highly similar to ( 601) AT3G54850 | Symbols: ATPUB14, PUB14 | PUB14; ubiquitin-protein ligase | chr3:20321524-20323848 FORWARDhighly similar to ( 541) SPL11_ORYSA Spotted leaf protein 11 (Spotted leaf11) (Cell death-related protein SPL11) - Oryza sativa (Rice)highly similar to ( 884) loc_os06g01304 12006.m71404 protein spotted leaf protein 11, putative, expressed seq=cds; coord=9:29398248..29400…	1.24378	GO:0043234//protein complex	GO:0005488//binding;GO:0019787//small conjugating protein ligase activity	GO:0032446//protein modification by small protein conjugation	gi|195615784|gb|ACG29722.1|/0/spotted leaf protein 11 [Zea mays]
GRMZM5G868683_T03	GRMZM5G868683	egg (balst in Arabidopsis)	protein.degradation.ubiquitin.E3.SCF.FBOX	moderately similar to ( 308) AT3G48880 | Symbols: | F-box family protein | chr3:18127873-18129008 FORWARDhighly similar to ( 566) loc_os10g35920 12010.m06407 protein F-box domain containing protein, expressed seq=cds; coord=1:226130128..226137023:1; parent_gene=GRMZM5G868683	1.03369	-	-	-	gi|226505430|ref|NP_001141683.1|/0/uncharacterized protein LOC100273810 [Zea mays]
GRMZM2G025048_T01	GRMZM2G025048	egg (balst in Arabidopsis) /central cell (balst in Arabidopsis)	protein.glycosylation	highly similar to ( 506) AT5G62620 | Symbols: | galactosyltransferase family protein | chr5:25137136-25139433 FORWARDmoderately similar to ( 201) CDC21_ORYSA Cell division control protein 2 homolog 1 (EC 2.7.11.22) - Oryza sativa (Rice)highly similar to ( 611) loc_os07g09690 12007.m05424 protein galactosyltransferase/ transferase, transferring hexosyl groups, putative, expressed seq=cds; coord=1:…	1.05191	GO:0043231//intracellular membrane-bounded organelle;GO:0031224//intrinsic to membrane	GO:0030246//carbohydrate binding;GO:0008378//galactosyltransferase activity	GO:0006464//cellular protein modification process	gi|357119165|ref|XP_003561316.1|/8.24147e-178/PREDICTED: probable beta-1,3-galactosyltransferase 19-like [Brachypodium distachyon]
GRMZM2G003167_T01	GRMZM2G003167	egg (balst in Arabidopsis)/central cell (balst in Arabidopsis)	Biodegradation of Xenobiotics	weakly similar to ( 107) AT1G49660 | Symbols: AtCXE5 | AtCXE5 (Arabidopsis thaliana carboxyesterase 5); carboxylesterase | chr1:18378777-18379736 REVERSEweakly similar to ( 176) loc_os06g11130 12006.m05830 protein gibberellin receptor GID1L2, putative, expressed seq=cds; coord=9:4777054..4777932:1; parent_gene=GRMZM2G003167	1.08955	-	GO:0004871//signal transducer activity	-	gi|226508280|ref|NP_001149797.1|/1.48895e-59/LOC100283424 [Zea mays]
GRMZM2G015441_T01	GRMZM2G015441	egg (balst in Arabidopsis)/central cell (balst in Arabidopsis)	protein.degradation.aspartate protease	weakly similar to ( 126) AT5G36260 | Symbols: | aspartyl protease family protein | chr5:14285068-14288179 REVERSEweakly similar to ( 167) loc_os04g26834 12004.m07808 protein pepsin A, putative, expressed seq=cds; coord=5:160093191..160123117:-1; parent_gene=GRMZM2G015441	2.66031	GO:0031410//cytoplasmic vesicle	-	-	gi|223942467|gb|ACN25317.1|/1.00098e-60/unknown [Zea mays]
GRMZM2G020255_T01	GRMZM2G020255	egg (balst in Arabidopsis)/central cell (balst in Arabidopsis)	not assigned.unknown	weakly similar to ( 113) AT2G20940 | Symbols: | unknown protein | chr2:9002264-9002653 REVERSEweakly similar to ( 168) loc_os09g36982 12009.m21931 protein expressed protein seq=cds; coord=7:175345308..175346027:1; parent_gene=GRMZM2G020255	1.33016	GO:0043231//intracellular membrane-bounded organelle	-	-	gi|223945225|gb|ACN26696.1|/4.98632e-78/unknown [Zea mays]
GRMZM2G027166_T01	GRMZM2G027166	egg (balst in Arabidopsis)/central cell (balst in Arabidopsis)	not assigned.unknown	moderately similar to ( 393) AT4G11570 | Symbols: | haloacid dehalogenase-like hydrolase family protein | chr4:7004743-7005864 FORWARDhighly similar to ( 590) loc_os09g39560 12009.m06894 protein genetic modifier, putative, expressed seq=cds; coord=2:164987053..164989537:-1; parent_gene=GRMZM2G027166	1.03723	GO:0043231//intracellular membrane-bounded organelle	GO:0003824//catalytic activity	-	gi|226506112|ref|NP_001152141.1|/0/LOC100285779 [Zea mays]
GRMZM2G028570_T01	GRMZM2G028570	egg (balst in Arabidopsis)/central cell (balst in Arabidopsis)	transport.sugars	moderately similar to ( 219) AT1G19450 | Symbols: | integral membrane protein, putative / sugar transporter family protein | chr1:6731671-6734633 REVERSEmoderately similar to ( 240) loc_os05g49270 12005.m08997 protein solute carrier family 2, facilitated glucose transporter member 8, putative, expressed seq=cds; coord=8:71714905..71721778:1; parent_gene=GRMZM2G028570	1.30835	GO:0031224//intrinsic to membrane	GO:0022857//transmembrane transporter activity	GO:0006810//transport	gi|259489860|ref|NP_001159053.1|/1.11999e-85/solute carrier family 2, facilitated glucose transporter member 8 [Zea mays]
GRMZM2G030436_T01	GRMZM2G030436	egg (balst in Arabidopsis)/central cell (balst in Arabidopsis)	secondary metabolism.phenylpropanoids	weakly similar to ( 144) AT5G48930 | Symbols: HCT | HCT (HYDROXYCINNAMOYL-COA SHIKIMATE/QUINATE HYDROXYCINNAMOYL TRANSFERASE); quinate O-hydroxycinnamoyltransferase/ shikimate O-hydroxycinnamoyltransferase/ transferase | chr5:19836654-19838092 REVERSEweakly similar to ( 112) HCBT1_DIACA Anthranilate N-benzoyltransferase protein 1 (EC 2.3.1.144) (Anthranilate N-hydroxycinnamoyl/benzoyltransferase …	1.51332	-	-	-	gi|326503860|dbj|BAK02716.1|/5.10334e-168/predicted protein [Hordeum vulgare subsp. vulgare]
GRMZM2G038801_T01	GRMZM2G038801	egg (balst in Arabidopsis)/central cell (balst in Arabidopsis)	protein.folding	weakly similar to ( 155) AT5G17840 | Symbols: | chaperone protein dnaJ-related | chr5:5895879-5897055 REVERSEweakly similar to ( 200) loc_os03g45344 12003.m101618 protein expressed protein seq=cds; coord=5:15462042..15464658:1; parent_gene=GRMZM2G038801	2.56322	GO:0043231//intracellular membrane-bounded organelle	GO:0005515//protein binding	GO:0044267//cellular protein metabolic process	gi|259490557|ref|NP_001159092.1|/5.21348e-64/uncharacterized protein LOC100304151 [Zea mays]
GRMZM2G047486_T01	GRMZM2G047486	egg (balst in Arabidopsis)/central cell (balst in Arabidopsis)	signalling.calcium	highly similar to ( 764) AT4G09570 | Symbols: CPK4, ATCPK4 | CPK4; calmodulin-dependent protein kinase/ kinase/ protein kinase | chr4:6049560-6052184 FORWARDhighly similar to ( 766) CDPK_SOYBN Calcium-dependent protein kinase SK5 (EC 2.7.11.1) (CDPK) - Glycine max (Soybean)highly similar to ( 940) loc_os11g07040 12011.m04900 protein calcium-dependent protein kinase, isoform AK1, putative, express…	1.10522	-	GO:0046872//metal ion binding;GO:0004674//protein serine/threonine kinase activity;GO:0032559	GO:0006464//cellular protein modification process	gi|162460670|ref|NP_001105752.1|/0/calcium-dependent protein kinase ZmCPK11 [Zea mays]
GRMZM2G062186_T01	GRMZM2G062186	egg (balst in Arabidopsis)/central cell (balst in Arabidopsis)	nucleotide metabolism.salvage.NUDIX hydrolases	weakly similar to ( 179) AT3G12600 | Symbols: atnudt16 | atnudt16 (Arabidopsis thaliana Nudix hydrolase homolog 16); hydrolase | chr3:4004676-4005995 FORWARDmoderately similar to ( 244) loc_os03g59580 12003.m10855 protein nudix hydrolase 13, mitochondrial precursor, putative, expressed seq=cds; coord=3:9329248..9330293:1; parent_gene=GRMZM2G062186	1.46495	GO:0043231//intracellular membrane-bounded organelle	GO:0003824//catalytic activity	-	gi|226507054|ref|NP_001148611.1|/1.12635e-83/nudix hydrolase 13 [Zea mays]
GRMZM2G076981_T02	GRMZM2G076981	egg (balst in Arabidopsis)/central cell (balst in Arabidopsis)	misc.short chain dehydrogenase/reductase (SDR)	moderately similar to ( 237) AT4G03140 | Symbols: | binding / catalytic/ oxidoreductase | chr4:1392191-1393662 FORWARDweakly similar to ( 192) TS2_MAIZE Sex determination protein tasselseed-2 - Zea mays (Maize)moderately similar to ( 368) loc_os07g40250 12007.m08266 protein sex determination protein tasselseed-2, putative, expressed seq=cds; coord=7:162398192..162399451:1; parent_gene=GRMZM2G0769…	1.18655	GO:0043231//intracellular membrane-bounded organelle	GO:0003824//catalytic activity	GO:0008152//metabolic process	gi|242046170|ref|XP_002460956.1|/8.05356e-123/hypothetical protein SORBIDRAFT_02g038140 [Sorghum bicolor]
GRMZM2G114918_T01	GRMZM2G114918	egg (balst in Arabidopsis)/central cell (balst in Arabidopsis)	secondary metabolism.phenylpropanoids	weakly similar to ( 143) AT5G48930 | Symbols: HCT | HCT (HYDROXYCINNAMOYL-COA SHIKIMATE/QUINATE HYDROXYCINNAMOYL TRANSFERASE); quinate O-hydroxycinnamoyltransferase/ shikimate O-hydroxycinnamoyltransferase/ transferase | chr5:19836654-19838092 REVERSEweakly similar to ( 107) HCBT2_DIACA Anthranilate N-benzoyltransferase protein 2 (EC 2.3.1.144) (Anthranilate N-hydroxycinnamoyl/benzoyltransferase …	5.71247	-	-	-	gi|293332045|ref|NP_001169239.1|/0/uncharacterized protein LOC100383097 [Zea mays]
GRMZM2G125448_T01	GRMZM2G125448	egg (balst in Arabidopsis)/central cell (balst in Arabidopsis)	secondary metabolism.phenylpropanoids.lignin biosynthesis.HCT	weakly similar to ( 173) AT5G48930 | Symbols: HCT | HCT (HYDROXYCINNAMOYL-COA SHIKIMATE/QUINATE HYDROXYCINNAMOYL TRANSFERASE); quinate O-hydroxycinnamoyltransferase/ shikimate O-hydroxycinnamoyltransferase/ transferase | chr5:19836654-19838092 REVERSEweakly similar to ( 168) HCBT1_DIACA Anthranilate N-benzoyltransferase protein 1 (EC 2.3.1.144) (Anthranilate N-hydroxycinnamoyl/benzoyltransferase …	9.16291	-	GO:0016740//transferase activity	-	gi|125564563|gb|EAZ09943.1|/0/hypothetical protein OsI_32242 [Oryza sativa Indica Group]
GRMZM2G129304_T01	GRMZM2G129304	egg (balst in Arabidopsis)/central cell (balst in Arabidopsis)	amino acid metabolism.misc	moderately similar to ( 379) AT1G69040 | Symbols: ACR4 | ACR4 (ACT REPEAT 4); amino acid binding | chr1:25957843-25960079 FORWARDhighly similar to ( 605) loc_os08g42080 12008.m08186 protein ACR5, putative, expressed seq=cds; coord=4:45846905..45849999:-1; parent_gene=GRMZM2G129304	9.00053	-	-	-	gi|293332811|ref|NP_001169709.1|/0/uncharacterized protein LOC100383590 [Zea mays]
GRMZM2G131165_T01	GRMZM2G131165	egg (balst in Arabidopsis)/central cell (balst in Arabidopsis)	secondary metabolism.phenylpropanoids.lignin biosynthesis.HCT	moderately similar to ( 297) AT5G48930 | Symbols: HCT | HCT (HYDROXYCINNAMOYL-COA SHIKIMATE/QUINATE HYDROXYCINNAMOYL TRANSFERASE); quinate O-hydroxycinnamoyltransferase/ shikimate O-hydroxycinnamoyltransferase/ transferase | chr5:19836654-19838092 REVERSEmoderately similar to ( 233) HCBT1_DIACA Anthranilate N-benzoyltransferase protein 1 (EC 2.3.1.144) (Anthranilate N-hydroxycinnamoyl/benzoyltran…	3.51656	-	GO:0016746//transferase activity, transferring acyl groups	-	gi|226494127|ref|NP_001147464.1|/0/anthranilate N-benzoyltransferase protein 1 [Zea mays]
GRMZM2G131817_T01	GRMZM2G131817	egg (balst in Arabidopsis)/central cell (balst in Arabidopsis)	not assigned.unknown	moderately similar to ( 262) AT2G20710 | Symbols: | pentatricopeptide (PPR) repeat-containing protein | chr2:8926535-8927722 FORWARDhighly similar to ( 564) loc_os10g35750 12010.m06393 protein tetratricopeptide-like helical, putative, expressed seq=cds; coord=1:226455391..226457613:-1; parent_gene=GRMZM2G131817	1.10029	GO:0043231//intracellular membrane-bounded organelle	-	-	gi|195613552|gb|ACG28606.1|/0/tetratricopeptide-like helical [Zea mays]
GRMZM2G135165_T01	GRMZM2G135165	egg (balst in Arabidopsis)/central cell (balst in Arabidopsis)	not assigned.unknown	very weakly similar to (82.0) AT5G17210 | Symbols: | unknown protein | chr5:5656700-5657970 FORWARDweakly similar to ( 160) loc_os05g35930 12005.m07823 protein expressed protein seq=cds; coord=6:150367837..150369671:-1; parent_gene=GRMZM2G135165	24.538	GO:0031410//cytoplasmic vesicle	-	-	gi|293334861|ref|NP_001170744.1|/1.91793e-147/uncharacterized protein LOC100384836 [Zea mays]
GRMZM2G145396_T01	GRMZM2G145396	egg (balst in Arabidopsis)/central cell (balst in Arabidopsis)	stress.abiotic.unspecified	weakly similar to ( 123) AT1G01170 | Symbols: | ozone-responsive stress-related protein, putative | chr1:74105-74443 REVERSEweakly similar to ( 156) loc_os06g02470 12006.m04980 protein ATOZI1, putative, expressed seq=cds; coord=6:58876438..58878429:1; parent_gene=GRMZM2G145396	1.04668	GO:0031410//cytoplasmic vesicle;GO:0043231//intracellular membrane-bounded organelle	-	GO:0050896//response to stimulus	gi|238005664|gb|ACR33867.1|/1.3478e-42/unknown [Zea mays]
GRMZM2G152258_T01	GRMZM2G152258	egg (balst in Arabidopsis)/central cell (balst in Arabidopsis)	misc.nitrilases, *nitrile lyases, berberine bridge enzymes, reticuline oxidases, troponine reductases	moderately similar to ( 235) AT5G06060 | Symbols: | tropinone reductase, putative / tropine dehydrogenase, putative | chr5:1824066-1825833 REVERSEvery weakly similar to (93.2) FABG4_BRANA 3-oxoacyl-[acyl-carrier-protein] reductase 4 (EC 1.1.1.100) (3-ketoacyl-acyl carrier protein reductase 4) (Fragment) - Brassica napus (Rape)moderately similar to ( 281) loc_os11g43360 12011.m08171 protein tropin…	8.86771	-	GO:0003824//catalytic activity	GO:0008152//metabolic process	gi|226496343|ref|NP_001141512.1|/5.20236e-118/uncharacterized protein LOC100273624 [Zea mays]
GRMZM2G163172_T01	GRMZM2G163172	egg (balst in Arabidopsis)/central cell (balst in Arabidopsis)	cell.vesicle transport	weakly similar to ( 122) AT5G50380 | Symbols: ATEXO70F1 | ATEXO70F1 (exocyst subunit EXO70 family protein F1); protein binding | chr5:20516382-20518433 REVERSEmoderately similar to ( 437) loc_os06g08460 12006.m05565 protein exo70 exocyst complex subunit family protein, expressed seq=cds; coord=4:86877721..86879464:-1; parent_gene=GRMZM2G163172	3.07522	GO:0043231//intracellular membrane-bounded organelle	-	-	gi|242092238|ref|XP_002436609.1|/9.72014e-180/hypothetical protein SORBIDRAFT_10g005610 [Sorghum bicolor]
GRMZM2G166940_T01	GRMZM2G166940	egg (balst in Arabidopsis)/central cell (balst in Arabidopsis)	misc.UDP glucosyl and glucoronyl transferases	moderately similar to ( 424) AT3G02350 | Symbols: GAUT9 | GAUT9 (Galacturonosyltransferase 9); polygalacturonate 4-alpha-galacturonosyltransferase/ transferase, transferring glycosyl groups / transferase, transferring hexosyl groups | chr3:479248-481178 FORWARDhighly similar to ( 644) loc_os02g51130 12002.m10147 protein glycosyl transferase family 8 protein, expressed seq=cds; coord=UNKNOWN:28382…	1.87889	GO:0043231//intracellular membrane-bounded organelle	GO:0016757//transferase activity, transferring glycosyl groups	-	gi|242065990|ref|XP_002454284.1|/0/hypothetical protein SORBIDRAFT_04g028010 [Sorghum bicolor]
GRMZM2G177227_T01	GRMZM2G177227	egg (balst in Arabidopsis)/central cell (balst in Arabidopsis)	cell.vesicle transport	weakly similar to ( 158) AT5G50380 | Symbols: ATEXO70F1 | ATEXO70F1 (exocyst subunit EXO70 family protein F1); protein binding | chr5:20516382-20518433 REVERSEmoderately similar to ( 434) loc_os01g67810 12001.m12885 protein exo70 exocyst complex subunit family protein, expressed seq=cds; coord=3:165857866..165860031:-1; parent_gene=GRMZM2G177227	1.38464	GO:0043234//protein complex	-	GO:0016192//vesicle-mediated transport	gi|212723308|ref|NP_001131595.1|/0/uncharacterized protein LOC100192942 [Zea mays]
GRMZM2G304121_T01	GRMZM2G304121	egg (balst in Arabidopsis)/central cell (balst in Arabidopsis)	protein.synthesis.initiation	moderately similar to ( 369) AT3G55620 | Symbols: emb1624 | emb1624 (embryo defective 1624); ribosome binding / translation initiation factor | chr3:20634581-20636312 FORWARDmoderately similar to ( 293) IF6_BETVU Eukaryotic translation initiation factor 6 (eIF-6) (Fragment) - Beta vulgaris (Sugar beet)moderately similar to ( 383) loc_os07g44620 12007.m29287 protein eukaryotic translation initiati…	1.62669	-	GO:0043021//ribonucleoprotein complex binding;GO:0008135//translation factor activity, nucleic acid binding	GO:0042255//ribosome assembly	gi|226504598|ref|NP_001147479.1|/1.01606e-133/eukaryotic translation initiation factor 6 [Zea mays]
GRMZM2G326545_T01	GRMZM2G326545	egg (balst in Arabidopsis)/central cell (balst in Arabidopsis)	not assigned.unknown	very weakly similar to (85.5) AT3G51500 | Symbols: | unknown protein | chr3:19108353-19108703 FORWARDweakly similar to ( 176) loc_os02g10010 12002.m33593 protein expressed protein seq=cds; coord=5:123963773..123965324:-1; parent_gene=GRMZM2G326545	1.16794	GO:0009536//plastid	-	-	gi|226510580|ref|NP_001143483.1|/2.64764e-76/uncharacterized protein LOC100276156 [Zea mays]
GRMZM2G387076_T01	GRMZM2G387076	egg (balst in Arabidopsis)/central cell (balst in Arabidopsis)	cell.vesicle transport	moderately similar to ( 315) AT5G58060 | Symbols: YKT61, ATYKT61, ATGP1 | YKT61 | chr5:23498277-23500128 FORWARDmoderately similar to ( 352) loc_os01g64650 12001.m43292 protein VAMP-like protein YKT62, putative, expressed seq=cds; coord=8:166498697..166503138:-1; parent_gene=GRMZM2G387076	1.47482	GO:0000785//chromatin;GO:0043231//intracellular membrane-bounded organelle;GO:0031224//intrinsic to membrane	GO:0003676//nucleic acid binding	GO:0034728//nucleosome organization;GO:0006810//transport	gi|242055091|ref|XP_002456691.1|/4.97609e-108/hypothetical protein SORBIDRAFT_03g040890 [Sorghum bicolor]
GRMZM2G449779_T01	GRMZM2G449779	egg (balst in Arabidopsis)/central cell (balst in Arabidopsis)	not assigned.unknown	highly similar to ( 523) AT1G72320 | Symbols: APUM23 | APUM23 (Arabidopsis Pumilio 23); RNA binding / binding | chr1:27228984-27232514 REVERSEnearly identical (1076) loc_os10g25110 12010.m05461 protein RNA binding protein, putative, expressed seq=cds; coord=1:141269683..141284918:-1; parent_gene=GRMZM2G449779	1.32239	GO:0031981//nuclear lumen	GO:0005488//binding	-	gi|242057193|ref|XP_002457742.1|/0/hypothetical protein SORBIDRAFT_03g012680 [Sorghum bicolor]
GRMZM2G459864_T01	GRMZM2G459864	egg (balst in Arabidopsis)/central cell (balst in Arabidopsis)	RNA.regulation of transcription.MADS box transcription factor family	weakly similar to ( 107) AT5G60440 | Symbols: AGL62 | AGL62 (Agamous-like 62); DNA binding / transcription factor | chr5:24306329-24307520 FORWARDweakly similar to ( 139) loc_os05g23780 12005.m06672 protein DNA binding protein, putative seq=cds; coord=10:69130821..69131585:-1; parent_gene=GRMZM2G459864	15.7741	GO:0043231//intracellular membrane-bounded organelle	GO:0003677//DNA binding;GO:0001071//nucleic acid binding transcription factor activity	GO:0010468//regulation of gene expression;GO:0006351//transcription, DNA-dependent	gi|242080997|ref|XP_002445267.1|/1.87439e-89/hypothetical protein SORBIDRAFT_07g007373 [Sorghum bicolor]
GRMZM2G477457_T01	GRMZM2G477457	egg (balst in Arabidopsis)/central cell (balst in Arabidopsis)	transport.potassium	highly similar to ( 900) AT3G02050 | Symbols: KUP3, ATKUP3, ATKT4 | KUP3 (K+ UPTAKE TRANSPORTER 3); potassium ion transmembrane transporter | chr3:350815-354135 FORWARDnearly identical (1158) HAK3_ORYSA Probable potassium transporter 3 (OsHAK3) - Oryza sativa (Rice)nearly identical (1158) loc_os01g27170 12001.m09168 protein potassium transporter 3, putative, expressed seq=cds; coord=8:52203774..5…	1.08875	GO:0031410//cytoplasmic vesicle	GO:0046873//metal ion transmembrane transporter activity	GO:0030001//metal ion transport	gi|242057387|ref|XP_002457839.1|/0/hypothetical protein SORBIDRAFT_03g015030 [Sorghum bicolor]
GRMZM5G815077_T01	GRMZM5G815077	egg (balst in Arabidopsis)/central cell (balst in Arabidopsis)	RNA.regulation of transcription.unclassified	very weakly similar to (98.2) AT5G50380 | Symbols: ATEXO70F1 | ATEXO70F1 (exocyst subunit EXO70 family protein F1); protein binding | chr5:20516382-20518433 REVERSEmoderately similar to ( 394) loc_os09g17810 12009.m05039 protein expressed protein seq=cds; coord=5:98937599..98939741:1; parent_gene=GRMZM5G815077	1.16195	-	-	-	gi|125563344|gb|EAZ08724.1|/1.14824e-108/hypothetical protein OsI_30994 [Oryza sativa Indica Group]
GRMZM5G828312_T02	GRMZM5G828312	egg (balst in Arabidopsis)/central cell (balst in Arabidopsis)	OPP.non-reductive PP.transaldolase	weakly similar to ( 158) AT5G13420 | Symbols: | transaldolase, putative | chr5:4302080-4304212 REVERSEweakly similar to ( 177) loc_os01g70170 12001.m13065 protein transaldolase 2, putative, expressed seq=cds; coord=3:157092017..157093432:1; parent_gene=GRMZM5G828312	3.41025	GO:0043231//intracellular membrane-bounded organelle	GO:0016744	GO:0006007//glucose catabolic process	gi|223975137|gb|ACN31756.1|/7.50151e-59/unknown [Zea mays]
GRMZM2G017809_T01	GRMZM2G017809	egg (balst in Zea mays)	not assigned.unknown	seq=cds; coord=3:64703497..64704237:1; parent_gene=GRMZM2G017809	1.19714	-	-	-	gi|212721020|ref|NP_001132152.1|/3.07494e-18/uncharacterized protein LOC100193571 [Zea mays]
GRMZM2G045155_T02	GRMZM2G045155	egg (balst in Zea mays)	development.unspecified	weakly similar to ( 103) AT3G29970 | Symbols: | germination protein-related | chr3:11745299-11746481 FORWARDweakly similar to ( 138) loc_os07g41340 12007.m08370 protein B12D protein, expressed seq=cds; coord=7:164234834..164235526:1; parent_gene=GRMZM2G045155	21.8302	GO:0031410//cytoplasmic vesicle	-	-	gi|195617730|gb|ACG30695.1|/2.33459e-40/B12D protein [Zea mays]
GRMZM2G050768_T01	GRMZM2G050768	egg (balst in Zea mays)	not assigned.unknown	very weakly similar to (90.5) loc_os03g60840 12003.m10972 protein Bowman-Birk type trypsin inhibitor, putative, expressed seq=cds; coord=6:14113901..14114788:-1; parent_gene=GRMZM2G050768	2.87444	-	GO:0004866//endopeptidase inhibitor activity	-	gi|195623460|gb|ACG33560.1|/1.7277e-49/Bowman-Birk type trypsin inhibitor [Zea mays]
GRMZM2G061941_T01	GRMZM2G061941	egg (balst in Zea mays)	not assigned.unknown	very weakly similar to (85.1) loc_os02g51740 12002.m10205 protein VQ motif family protein, expressed seq=cds; coord=5:208198242..208199181:-1; parent_gene=GRMZM2G061941	1.63015	-	-	-	gi|226502424|ref|NP_001147234.1|/4.96111e-56/VQ motif family protein [Zea mays]
GRMZM2G071390_T01	GRMZM2G071390	egg (balst in Zea mays)	stress.abiotic.unspecified	moderately similar to ( 224) AT5G38960 | Symbols: | germin-like protein, putative | chr5:15592992-15593783 FORWARDweakly similar to ( 190) RHRE_PEA Rhicadhesin receptor precursor (Germin-like protein) - Pisum sativum (Garden pea)moderately similar to ( 360) loc_os12g05860 12012.m04577 protein germin-like protein subfamily 1 member 8 precursor, putative, expressed seq=cds; coord=10:58580220..58581…	1.92066	GO:0005576//extracellular region;GO:0031410//cytoplasmic vesicle	GO:0046914//transition metal ion binding	-	gi|215260099|gb|ACJ64505.1|/4.87456e-117/germin-like protein [Zea mays]
GRMZM2G108228_T01	GRMZM2G108228	egg (balst in Zea mays)	protein.degradation.ubiquitin.E3.SCF.FBOX	highly similar to ( 527) AT1G25280 | Symbols: AtTLP10 | AtTLP10 (TUBBY LIKE PROTEIN 10); phosphoric diester hydrolase/ transcription factor | chr1:8865676-8866608 FORWARDhighly similar to ( 660) loc_os04g59130 12004.m10790 protein tubby-like protein, putative, expressed seq=cds; coord=2:24807435..24811848:1; parent_gene=GRMZM2G108228	1.43276	-	-	-	gi|226497870|ref|NP_001147678.1|/0/LOC100281288 [Zea mays]
GRMZM2G110616_T01	GRMZM2G110616	egg (balst in Zea mays)	lipid metabolism.FA synthesis and FA elongation.acyl coa ligase	highly similar to ( 623) AT1G20560 | Symbols: AAE1 | AAE1 (ACYL ACTIVATING ENZYME 1); AMP binding | chr1:7119927-7121363 REVERSEweakly similar to ( 121) 4CL2_PETCR 4-coumarate--CoA ligase 1 (EC 6.2.1.12) (4CL 1) (4-coumaroyl-CoA synthase 1) - Petroselinum crispum (Parsley) (Petroselinum hortense)highly similar to ( 800) loc_os03g04120 12003.m05944 protein AMP binding protein, putative, expressed …	1.38198	-	GO:0003824//catalytic activity	-	gi|293337111|ref|NP_001169640.1|/0/uncharacterized protein LOC100383521 [Zea mays]
GRMZM2G112538_T01	GRMZM2G112538	egg (balst in Zea mays)	stress.biotic	weakly similar to ( 167) PR1_ASPOF Pathogenesis-related protein 1 (AOPR1) - Asparagus officinalis (Garden asparagus)moderately similar to ( 280) loc_os03g18850 12003.m07305 protein pathogenesis-related protein 1, putative, expressed seq=cds; coord=1:47149321..47150335:1; parent_gene=GRMZM2G112538	6.27323	-	-	GO:0006950//response to stress	gi|212275926|ref|NP_001131012.1|/9.91148e-86/uncharacterized protein LOC100192117 [Zea mays]
GRMZM2G117365_T01	GRMZM2G117365	egg (balst in Zea mays)	misc.peroxidases	moderately similar to ( 278) AT5G06730 | Symbols: | peroxidase, putative | chr5:2080207-2081621 REVERSEmoderately similar to ( 276) PER2_CUCSA Peroxidase 2 (EC 1.11.1.7) (CUP2) (Fragment) - Cucumis sativus (Cucumber)moderately similar to ( 358) loc_os03g13180 12003.m06764 protein peroxidase 54 precursor, putative, expressed seq=cds; coord=8:102488133..102490149:1; parent_gene=GRMZM2G117365	2.49493	-	GO:0005506//iron ion binding;GO:0003824//catalytic activity;GO:0016209//antioxidant activity	GO:0008152//metabolic process;GO:0006950//response to stress	gi|242088013|ref|XP_002439839.1|/3.98341e-138/hypothetical protein SORBIDRAFT_09g021000 [Sorghum bicolor]
GRMZM2G132706_T01	GRMZM2G132706	egg (balst in Zea mays)	misc.UDP glucosyl and glucoronyl transferases	moderately similar to ( 476) AT1G22370 | Symbols: AtUGT85A5 | AtUGT85A5 (UDP-glucosyl transferase 85A5); glucuronosyltransferase/ transferase, transferring glycosyl groups | chr1:7898116-7899879 REVERSEweakly similar to ( 176) UFO3_MAIZE Anthocyanidin 3-O-glucosyltransferase (EC 2.4.1.115) (Flavonol 3-O-glucosyltransferase) (UDP-glucose flavonoid 3-O-glucosyltransferase) (Bronze-1) (Bz-W22 allele…	1.66197	GO:0043231//intracellular membrane-bounded organelle	GO:0016757//transferase activity, transferring glycosyl groups	-	gi|242062094|ref|XP_002452336.1|/0/hypothetical protein SORBIDRAFT_04g023930 [Sorghum bicolor]
GRMZM2G150474_T01	GRMZM2G150474	egg (balst in Zea mays)	misc.glutathione S transferases	weakly similar to ( 170) AT3G62760 | Symbols: ATGSTF13 | ATGSTF13; glutathione transferase | chr3:23217425-23218246 REVERSEmoderately similar to ( 350) GSTF4_MAIZE Glutathione S-transferase IV (EC 2.5.1.18) (GST-IV) (GST-27) (GST class-phi) - Zea mays (Maize)moderately similar to ( 247) loc_os01g27210 12001.m09172 protein glutathione S-transferase IV, putative, expressed seq=cds; coord=8:12771998…	1.84498	-	GO:0016765//transferase activity, transferring alkyl or aryl (other than methyl) groups	-	gi|162462098|ref|NP_001105626.1|/3.43754e-121/glutathione S-transferase GST 15 [Zea mays]
GRMZM2G162505_T01	GRMZM2G162505	egg (balst in Zea mays)	PS.calvin cycle.rubisco interacting	very weakly similar to (85.9) RUAP_SOYBN RuBisCO-associated protein - Glycine max (Soybean)highly similar to ( 503) loc_os10g28050 12010.m05688 protein chitinase 2, putative, expressed seq=cds; coord=1:240766113..240767264:1; parent_gene=GRMZM2G162505	3.32539	GO:0031410//cytoplasmic vesicle	GO:0004553//hydrolase activity, hydrolyzing O-glycosyl compounds;GO:0043167//ion binding	GO:0000272//polysaccharide catabolic process	gi|194708348|gb|ACF88258.1|/1.59326e-166/unknown [Zea mays]
GRMZM2G308422_T01	GRMZM2G308422	egg (balst in Zea mays)	not assigned.unknown	seq=cds; coord=10:105818667..105818867:1; parent_gene=GRMZM2G308422	6.67064	-	-	-	-
GRMZM2G336824_T01	GRMZM2G336824	egg (balst in Zea mays)	secondary metabolism.phenylpropanoids	weakly similar to ( 161) AT4G35160 | Symbols: | O-methyltransferase family 2 protein | chr4:16730989-16732808 REVERSEmoderately similar to ( 342) ZRP4_MAIZE O-methyltransferase ZRP4 (EC 2.1.1.-) (OMT) - Zea mays (Maize)moderately similar to ( 337) loc_os05g43940 12005.m08520 protein O-methyltransferase ZRP4, putative, expressed seq=cds; coord=1:66387644..66390084:1; parent_gene=GRMZM2G336824	4.29193	-	GO:0005515//protein binding;GO:0008168//methyltransferase activity	-	gi|226500390|ref|NP_001140761.1|/0/uncharacterized protein LOC100272836 [Zea mays]
GRMZM2G022347_T01	GRMZM2G022347	egg (balst in Zea mays)/central cell (balst in Arabidopsis)	stress.abiotic.unspecified	weakly similar to ( 119) AT5G45880 | Symbols: | pollen Ole e 1 allergen and extensin family protein | chr5:18609934-18611066 REVERSEmoderately similar to ( 266) PSC13_MAIZE Pollen-specific protein C13 precursor - Zea mays (Maize)moderately similar to ( 238) loc_os04g32680 12004.m08366 protein pollen-specific protein C13 precursor, putative, expressed seq=cds; coord=2:62923977..62924902:1; parent_…	6.61918	GO:0031410//cytoplasmic vesicle;GO:0044421//extracellular region part	-	-	gi|194697222|gb|ACF82695.1|/3.10216e-87/unknown [Zea mays]
GRMZM2G320786_T01	GRMZM2G320786	egg (balst in Zea mays)/central cell (balst in Arabidopsis)	secondary metabolism.simple phenols	highly similar to ( 600) AT5G09360 | Symbols: LAC14 | LAC14 (laccase 14); laccase | chr5:2906426-2908658 REVERSEmoderately similar to ( 217) ASO_CUCSA L-ascorbate oxidase precursor (EC 1.10.3.3) (Ascorbase) (ASO) - Cucumis sativus (Cucumber)highly similar to ( 790) loc_os02g51440 12002.m10178 protein laccase, putative seq=cds; coord=5:207890406..207893256:-1; parent_gene=GRMZM2G320786	3.68814	GO:0005576//extracellular region;GO:0031410//cytoplasmic vesicle	GO:0046914//transition metal ion binding;GO:0016682//oxidoreductase activity, acting on diphenols and related substances as donors, oxygen as acceptor	GO:0009808//lignin metabolic process	gi|242062518|ref|XP_002452548.1|/0/hypothetical protein SORBIDRAFT_04g027860 [Sorghum bicolor]
AC233910.1_FGT003	AC233910.1	egg (balst in Zea mays)/synergid (balst in Arabidopsis)/egg (balst in Arabidopsis)/central cell (balst in Arabidopsis)	protein.degradation.ubiquitin.ubiquitin	weakly similar to ( 178) AT3G52590 | Symbols: UBQ1, EMB2167, ERD16, HAP4 | UBQ1 (UBIQUITIN EXTENSION PROTEIN 1); protein binding / structural constituent of ribosome | chr3:19505668-19506681 FORWARDweakly similar to ( 109) UBIQ_CHLRE Ubiquitin - Chlamydomonas reinhardtiimoderately similar to ( 209) loc_os09g27930 12009.m05944 protein UBiQuitin family member, putative, expressed seq=cds; coord=2:1…	4.43386	GO:0030529//ribonucleoprotein complex	GO:0005198//structural molecule activity	GO:0010467//gene expression	gi|226493281|ref|NP_001150785.1|/3.31169e-65/UBiQuitin family member [Zea mays]
GRMZM2G065088_T01	GRMZM2G065088	egg (balst in Zea mays)/synergid (balst in Arabidopsis)/egg (balst in Arabidopsis)/central cell (balst in Arabidopsis)	stress.abiotic.unspecified	weakly similar to ( 152) AT1G09560 | Symbols: GLP5 | GLP5 (GERMIN-LIKE PROTEIN 5); manganese ion binding / nutrient reservoir | chr1:3093896-3094639 FORWARDweakly similar to ( 149) RHRE_PEA Rhicadhesin receptor precursor (Germin-like protein) - Pisum sativum (Garden pea)weakly similar to ( 179) loc_os03g44880 12003.m09523 protein rhicadhesin receptor precursor, putative, expressed seq=cds; coord=…	1.02429	GO:0005576//extracellular region;GO:0031410//cytoplasmic vesicle	GO:0046914//transition metal ion binding	-	gi|242055589|ref|XP_002456940.1|/1.1417e-90/hypothetical protein SORBIDRAFT_03g045980 [Sorghum bicolor]
GRMZM2G151050_T01	GRMZM2G151050	egg (balst in Zea mays)/synergid (balst in Arabidopsis)/egg (balst in Arabidopsis)/central cell (balst in Arabidopsis)	cell.vesicle transport	moderately similar to ( 405) AT1G21380 | Symbols: | VHS domain-containing protein / GAT domain-containing protein | chr1:7485806-7488032 REVERSEhighly similar to ( 863) loc_os11g09329 12011.m079960 protein VHS and GAT domain protein, putative, expressed seq=cds; coord=4:14930698..14950684:-1; parent_gene=GRMZM2G151050	1.02177	GO:0044464//cell part	-	GO:0015031//protein transport	gi|238015416|gb|ACR38743.1|/0/unknown [Zea mays]
GRMZM2G159369_T01	GRMZM2G159369	egg (balst in Zea mays)/synergid (balst in Arabidopsis)/egg (balst in Arabidopsis)/central cell (balst in Arabidopsis)	redox.thioredoxin	highly similar to ( 522) AT2G47470 | Symbols: ATPDIL2-1, UNE5, MEE30, PDI11, ATPDI11 | UNE5 (UNFERTILIZED EMBRYO SAC 5); protein disulfide isomerase | chr2:19481503-19483683 FORWARDhighly similar to ( 531) PDIA6_MEDSA Probable protein disulfide-isomerase A6 precursor (EC 5.3.4.1) (P5) - Medicago sativa (Alfalfa)highly similar to ( 622) loc_os05g06430 12005.m27548 protein OsPDIL2-1 - Oryza sativa …	2.11519	GO:0043231//intracellular membrane-bounded organelle;GO:0031410//cytoplasmic vesicle	GO:0016862//intramolecular oxidoreductase activity, interconverting keto- and enol-groups	GO:0019725//cellular homeostasis;GO:0006091//generation of precursor metabolites and energy	gi|162461925|ref|NP_001105759.1|/0/protein disulfide isomerase7 precursor [Zea mays]
GRMZM2G163200_T02	GRMZM2G163200	egg (balst in Zea mays)/synergid (balst in Arabidopsis)/egg (balst in Arabidopsis)/central cell (balst in Arabidopsis)	RNA.regulation of transcription.C2C2(Zn) GATA transcription factor family	weakly similar to ( 132) AT3G54810 | Symbols: BME3-ZF, BME3 | zinc finger (GATA type) family protein | chr3:20296957-20298236 FORWARDmoderately similar to ( 202) loc_os02g56250 12002.m10648 protein GATA zinc finger family protein, expressed seq=cds; coord=5:214529132..214532172:1; parent_gene=GRMZM2G163200	1.44864	-	GO:0046914//transition metal ion binding;GO:0003677//DNA binding;GO:0001071//nucleic acid binding transcription factor activity	GO:0006351//transcription, DNA-dependent	gi|226502672|ref|NP_001145852.1|/8.51019e-84/uncharacterized protein LOC100279363 [Zea mays]
GRMZM2G163200_T04	GRMZM2G163200	egg (balst in Zea mays)/synergid (balst in Arabidopsis)/egg (balst in Arabidopsis)/central cell (balst in Arabidopsis)	RNA.regulation of transcription.C2C2(Zn) GATA transcription factor family	weakly similar to ( 132) AT3G54810 | Symbols: BME3-ZF, BME3 | zinc finger (GATA type) family protein | chr3:20296957-20298236 FORWARDmoderately similar to ( 202) loc_os02g56250 12002.m10648 protein GATA zinc finger family protein, expressed seq=cds; coord=5:214528773..214531988:1; parent_gene=GRMZM2G163200	1.06231	-	GO:0046914//transition metal ion binding;GO:0003677//DNA binding;GO:0001071//nucleic acid binding transcription factor activity	GO:0006351//transcription, DNA-dependent	gi|226502672|ref|NP_001145852.1|/1.57586e-82/uncharacterized protein LOC100279363 [Zea mays]
GRMZM2G173341_T02	GRMZM2G173341	egg (balst in Zea mays)/synergid (balst in Arabidopsis)/egg (balst in Arabidopsis)/central cell (balst in Arabidopsis)	cell wall.cell wall proteins.RGP	moderately similar to ( 449) AT5G16510 | Symbols: | reversibly glycosylated polypeptide, putative | chr5:5393296-5394342 FORWARDmoderately similar to ( 343) UPTG_PEA Alpha-1,4-glucan-protein synthase [UDP-forming] (EC 2.4.1.112) (UDP-glucose:protein transglucosylase) (UPTG) (Reversibly glycosylated polypeptide) - Pisum sativum (Garden pea)highly similar to ( 637) loc_os04g56520 12004.m35219 prote…	1.8004	GO:0044459//plasma membrane part;GO:0005618//cell wall;GO:0043231//intracellular membrane-bounded organelle	GO:0035251//UDP-glucosyltransferase activity	GO:0045229//external encapsulating structure organization;GO:0006970//response to osmotic stress;GO:0009250//glucan biosynthetic process	gi|194705168|gb|ACF86668.1|/0/unknown [Zea mays]
GRMZM2G026470_T01	GRMZM2G026470	egg (balst in Zea mays)/synergid (balst in Torenia fournieri)	nucleotide metabolism.phosphotransfer and pyrophosphatases.misc	moderately similar to ( 370) AT2G46860 | Symbols: AtPPa3 | AtPPa3 (Arabidopsis thaliana pyrophosphorylase 3); inorganic diphosphatase/ pyrophosphatase | chr2:19253843-19255060 FORWARDmoderately similar to ( 384) IPYR_MAIZE Soluble inorganic pyrophosphatase (EC 3.6.1.1) (Pyrophosphate phospho-hydrolase) (PPase) - Zea mays (Maize)moderately similar to ( 389) loc_os05g36260 12005.m07857 protein solu…	1.13713	GO:0043231//intracellular membrane-bounded organelle	GO:0046872//metal ion binding;GO:0016462//pyrophosphatase activity	GO:0006793//phosphorus metabolic process	gi|226495791|ref|NP_001140260.1|/3.05094e-126/uncharacterized protein LOC100272302 [Zea mays]
GRMZM2G051879_T05	GRMZM2G051879	egg (balst in Zea mays)/synergid (balst in Torenia fournieri)/synergid (balst in Arabidopsis)/egg (balst in Arabidopsis)/central cell (balst in Arabidopsis)	DNA.synthesis/chromatin structure.histone	moderately similar to ( 266) AT5G10980 | Symbols: | histone H3 | chr5:3472591-3473349 REVERSEmoderately similar to ( 264) H33_VITVI Histone H3.3 - Vitis vinifera (Grape)moderately similar to ( 266) loc_os06g04030 12006.m05134 protein histone H3, putative, expressed seq=cds; coord=1:67645110..67647420:1; parent_gene=GRMZM2G051879	1.37377	GO:0000785//chromatin;GO:0043231//intracellular membrane-bounded organelle	GO:0003676//nucleic acid binding	GO:0034728//nucleosome organization	gi|357476499|ref|XP_003608535.1|/4.91389e-70/Histone H3 [Medicago truncatula]
GRMZM2G090669_T02	GRMZM2G090669	synergid (balst in Arabidopsis)	not assigned.unknown	weakly similar to ( 125) AT1G50740 | Symbols: | unknown protein | chr1:18807861-18808765 FORWARDweakly similar to ( 157) loc_os03g37090 12003.m08821 protein expressed protein seq=cds; coord=5:20804066..20807844:1; parent_gene=GRMZM2G090669	1.04241	GO:0043231//intracellular membrane-bounded organelle	-	-	gi|226503373|ref|NP_001143601.1|/2.07887e-42/uncharacterized protein LOC100276307 [Zea mays]
GRMZM2G382341_T02	GRMZM2G382341	synergid (balst in Arabidopsis)	cell.organisation	moderately similar to ( 340) AT4G26700 | Symbols: ATFIM1 | ATFIM1; actin binding | chr4:13463760-13466927 FORWARDmoderately similar to ( 461) loc_os02g48740 12002.m09908 protein fimbrin 1, putative, expressed seq=cds; coord=5:203620982..203625743:1; parent_gene=GRMZM2G382341	1.08013	-	GO:0046872//metal ion binding;GO:0008092//cytoskeletal protein binding	-	gi|242066184|ref|XP_002454381.1|/0/hypothetical protein SORBIDRAFT_04g029730 [Sorghum bicolor]
GRMZM2G475059_T01	GRMZM2G475059	synergid (balst in Arabidopsis)	misc.glutathione S transferases	weakly similar to ( 182) AT1G10370 | Symbols: GST30, ATGSTU17, GST30B, ERD9 | ERD9 (EARLY-RESPONSIVE TO DEHYDRATION 9); glutathione transferase | chr1:3397274-3398273 REVERSEweakly similar to ( 174) GSTU6_ORYSA Probable glutathione S-transferase GSTU6 (EC 2.5.1.18) (28 kDa cold-induced protein) - Oryza sativa (Rice)moderately similar to ( 263) loc_os10g38140 12010.m06597 protein glutathione S-tra…	2.30576	-	GO:0016765//transferase activity, transferring alkyl or aryl (other than methyl) groups	-	gi|194701722|gb|ACF84945.1|/1.70173e-107/unknown [Zea mays]
GRMZM2G003551_T01	GRMZM2G003551	synergid (balst in Arabidopsis)/central cell (balst in Arabidopsis)	RNA.regulation of transcription.WRKY domain transcription factor family	weakly similar to ( 130) AT4G23810 | Symbols: WRKY53, ATWRKY53 | WRKY53; DNA binding / protein binding / transcription activator/ transcription factor | chr4:12392666-12393739 REVERSEmoderately similar to ( 243) loc_os06g06360 12006.m05362 protein WRKY transcription factor 30, putative, expressed seq=cds; coord=9:18101309..18104762:1; parent_gene=GRMZM2G003551	11.0718	GO:0009536//plastid	GO:0030528//transcription regulator activity;GO:0001071//nucleic acid binding transcription factor activity;GO:0003677//DNA binding	GO:0042742//defense response to bacterium;GO:0009743//response to carbohydrate stimulus;GO:0010468//regulation of gene expression;GO:0006351//transcription, DNA-dependent;GO:0010260//organ senescence;GO:0010557//positive regulation of macromolecule biosynthetic process	gi|242092050|ref|XP_002436515.1|/2.21752e-89/hypothetical protein SORBIDRAFT_10g004000 [Sorghum bicolor]
GRMZM2G004519_T01	GRMZM2G004519	synergid (balst in Arabidopsis)/central cell (balst in Arabidopsis)	protein.degradation.ubiquitin.E3.RING	very weakly similar to (84.7) AT2G42350 | Symbols: | zinc finger (C3HC4-type RING finger) family protein | chr2:17639245-17639898 FORWARDvery weakly similar to (91.3) EL5_ORYSA E3 ubiquitin-protein ligase EL5 (EC 6.3.2.-) - Oryza sativa (Rice)weakly similar to ( 188) loc_os01g20910 12001.m08575 protein RING-H2 finger protein ATL2L, putative, expressed seq=cds; coord=8:35643997..35644922:1; parent…	9.72192	GO:0043231//intracellular membrane-bounded organelle	-	-	gi|259490583|ref|NP_001159093.1|/7.18491e-68/RING-H2 finger protein ATL2L [Zea mays]
GRMZM2G026926_T01	GRMZM2G026926	synergid (balst in Arabidopsis)/central cell (balst in Arabidopsis)	RNA.regulation of transcription.AP2/EREBP, APETALA2/Ethylene-responsive element binding protein family	weakly similar to ( 156) AT2G20880 | Symbols: | AP2 domain-containing transcription factor, putative | chr2:8986053-8987063 FORWARDvery weakly similar to (87.0) ERF1_ORYSA Ethylene-responsive transcription factor 1 (Ethylene-responsive element-binding factor 1) (EREBP-1) (OsEREBP1) - Oryza sativa (Rice)moderately similar to ( 340) loc_os04g44670 12004.m09426 protein AP2 domain containing protein,…	6.84081	GO:0043231//intracellular membrane-bounded organelle	-	-	gi|242076564|ref|XP_002448218.1|/5.30807e-141/hypothetical protein SORBIDRAFT_06g023313 [Sorghum bicolor]
GRMZM2G059129_T01	GRMZM2G059129	synergid (balst in Arabidopsis)/central cell (balst in Arabidopsis)	lipid metabolism.lipid degradation.lysophospholipases.glycerophosphodiester phosphodiesterase	moderately similar to ( 402) AT5G55480 | Symbols: SVL1 | SVL1 (SHV3-LIKE 1); glycerophosphodiester phosphodiesterase/ phosphoric diester hydrolase | chr5:22474277-22477819 FORWARDmoderately similar to ( 494) loc_os08g39350 12008.m07916 protein glycerophosphoryl diester phosphodiesterase family protein, putative, expressed seq=cds; coord=1:187091607..187095229:1; parent_gene=GRMZM2G059129	2.32133	GO:0031410//cytoplasmic vesicle	GO:0008081//phosphoric diester hydrolase activity	GO:0019400	gi|293332323|ref|NP_001170117.1|/0/uncharacterized protein LOC100384038 [Zea mays]
GRMZM2G173315_T01	GRMZM2G173315	synergid (balst in Arabidopsis)/central cell (balst in Arabidopsis)	misc.UDP glucosyl and glucoronyl transferases	highly similar to ( 538) AT2G36970 | Symbols: | UDP-glucoronosyl/UDP-glucosyl transferase family protein | chr2:15529050-15530712 FORWARDmoderately similar to ( 230) IAAG_MAIZE Indole-3-acetate beta-glucosyltransferase (EC 2.4.1.121) (IAA-Glu synthetase) ((Uridine 5-diphosphate-glucose:indol-3-ylacetyl)-beta-D-glucosyl transferase) - Zea mays (Maize)highly similar to ( 719) loc_os10g30560 12010.m…	1.15387	-	GO:0016757//transferase activity, transferring glycosyl groups	-	gi|293333129|ref|NP_001169578.1|/0/uncharacterized protein LOC100383459 [Zea mays]
GRMZM2G352678_T01	GRMZM2G352678	synergid (balst in Arabidopsis)/central cell (balst in Arabidopsis)	misc.plastocyanin-like	weakly similar to ( 104) AT2G02850 | Symbols: ARPN | ARPN (PLANTACYANIN); copper ion binding / electron carrier | chr2:826630-827720 REVERSEweakly similar to ( 105) BABL_CUCSA Basic blue protein (Cusacyanin) (Plantacyanin) (CBP) - Cucumis sativus (Cucumber)weakly similar to ( 158) loc_os03g15340 12003.m06971 protein chemocyanin precursor, putative, expressed seq=cds; coord=1:36419515..36420602:1;…	1.18358	GO:0031410//cytoplasmic vesicle	GO:0046914//transition metal ion binding	-	gi|226497232|ref|NP_001149612.1|/2.12512e-49/chemocyanin precursor [Zea mays]
GRMZM2G430942_T01	GRMZM2G430942	synergid (balst in Arabidopsis)/central cell (balst in Arabidopsis)	stress.biotic	moderately similar to ( 333) AT5G24090 | Symbols: | acidic endochitinase (CHIB1) | chr5:8143805-8145153 REVERSEmoderately similar to ( 369) CHIT3_VITVI Acidic endochitinase precursor (EC 3.2.1.14) - Vitis vinifera (Grape)highly similar to ( 507) loc_os01g64100 12001.m12525 protein acidic endochitinase precursor, putative, expressed seq=cds; coord=3:176599800..176601118:-1; parent_gene=GRMZM2G4309…	3.31061	GO:0031410//cytoplasmic vesicle	GO:0004553//hydrolase activity, hydrolyzing O-glycosyl compounds;GO:0043167//ion binding	GO:0044238//primary metabolic process	gi|242059317|ref|XP_002458804.1|/5.57529e-157/hypothetical protein SORBIDRAFT_03g040570 [Sorghum bicolor]
GRMZM2G003558_T01	GRMZM2G003558	synergid (balst in Arabidopsis)/egg (balst in Arabidopsis)	RNA.regulation of transcription.EIN3-like(EIL) transcription factor family	moderately similar to ( 304) AT2G27050 | Symbols: EIL1 | EIL1 (ETHYLENE-INSENSITIVE3-LIKE 1); transcription factor/ transcription regulator | chr2:11546314-11548068 FORWARDmoderately similar to ( 467) loc_os07g48630 12007.m29024 protein ETHYLENE-INSENSITIVE3-like 1 protein, putative, expressed seq=cds; coord=2:217348828..217350753:-1; parent_gene=GRMZM2G003558	1.19341	-	-	-	gi|242051334|ref|XP_002463411.1|/0/hypothetical protein SORBIDRAFT_02g043350 [Sorghum bicolor]
GRMZM2G137329_T01	GRMZM2G137329	synergid (balst in Arabidopsis)/egg (balst in Arabidopsis)	misc.protease inhibitor/seed storage/lipid transfer protein (LTP) family protein	very weakly similar to (85.1) AT1G66850 | Symbols: | protease inhibitor/seed storage/lipid transfer protein (LTP) family protein | chr1:24936985-24937293 FORWARDweakly similar to ( 113) NLTPX_ORYSA Nonspecific lipid-transfer protein 2 precursor (nsLTP2) (7 kDa lipid transfer protein) - Oryza sativa (Rice)weakly similar to ( 113) loc_os03g02050 12003.m05748 protein nonspecific lipid-transfer prote…	4.49755	GO:0031410//cytoplasmic vesicle	-	GO:0006810//transport	gi|226504694|ref|NP_001148304.1|/2.38263e-35/LOC100281913 precursor [Zea mays]
GRMZM2G173192_T01	GRMZM2G173192	synergid (balst in Arabidopsis)/egg (balst in Arabidopsis)	fermentation.LDH	moderately similar to ( 422) AT4G17260 | Symbols: | L-lactate dehydrogenase, putative | chr4:9674057-9675309 FORWARDhighly similar to ( 528) LDH_MAIZE L-lactate dehydrogenase (EC 1.1.1.27) (LDH) - Zea mays (Maize)highly similar to ( 561) loc_os02g01510 12002.m05501 protein L-lactate dehydrogenase A, putative, expressed seq=cds; coord=5:67473287..67474604:1; parent_gene=GRMZM2G173192	5.6678	GO:0016020//membrane;GO:0044424//intracellular part	GO:0004457//lactate dehydrogenase activity	GO:0009725//response to hormone stimulus;GO:0006970//response to osmotic stress;GO:0006007//glucose catabolic process	gi|212724068|ref|NP_001131896.1|/0/uncharacterized protein LOC100193279 [Zea mays]
AC197699.3_FGT005	AC197699.3	synergid (balst in Arabidopsis)/egg (balst in Arabidopsis)/central cell (balst in Arabidopsis)	not assigned.unknown	very weakly similar to (88.6) AT5G46030 | Symbols: | unknown protein | chr5:18670531-18671138 FORWARDvery weakly similar to (89.0) ELOF1_ORYSA Transcription elongation factor 1 homolog - Oryza sativa (Rice)weakly similar to ( 105) loc_os06g06270 12006.m05353 protein transcription elongation factor 1, putative seq=cds; coord=9:17088257..17088583:1; parent_gene=AC197699.3_FG005	1.17151	-	-	-	gi|242094830|ref|XP_002437905.1|/2.89546e-37/hypothetical protein SORBIDRAFT_10g004650 [Sorghum bicolor]
AC197783.3_FGT005	AC197783.3	synergid (balst in Arabidopsis)/egg (balst in Arabidopsis)/central cell (balst in Arabidopsis)	protein.assembly and cofactor ligation	weakly similar to ( 101) AT5G54290 | Symbols: | cytochrome c biogenesis protein family | chr5:22051097-22053923 FORWARDweakly similar to ( 101) loc_os12g04270 12012.m04421 protein expressed protein seq=cds; coord=4:199912945..199915442:1; parent_gene=AC197783.3_FG005	1.00284	GO:0043231//intracellular membrane-bounded organelle;GO:0042651//thylakoid membrane	-	GO:0017004//cytochrome complex assembly;GO:0008152//metabolic process	gi|242069931|ref|XP_002450242.1|/7.22973e-22/hypothetical protein SORBIDRAFT_05g002430 [Sorghum bicolor]
AC208110.2_FGT005	AC208110.2	synergid (balst in Arabidopsis)/egg (balst in Arabidopsis)/central cell (balst in Arabidopsis)	transport.peptides and oligopeptides	very weakly similar to (85.1) AT2G02040 | Symbols: ATPTR2-B, NTR1, PTR2-B, PTR2, ATPTR2 | PTR2 (PEPTIDE TRANSPORTER 2); dipeptide transporter/ high affinity oligopeptide transporter/ nitrate transmembrane transporter/ peptide transporter/ transporter/ tripeptide transporter | chr2:487542-489707 FORWARDweakly similar to ( 168) loc_os04g50930 12004.m09990 protein peptide transporter PTR2, putative,…	1.43076	GO:0044464//cell part	GO:0016757//transferase activity, transferring glycosyl groups	-	gi|242074192|ref|XP_002447032.1|/3.36521e-75/hypothetical protein SORBIDRAFT_06g027300 [Sorghum bicolor]
AC234149.1_FGT002	AC234149.1	synergid (balst in Arabidopsis)/egg (balst in Arabidopsis)/central cell (balst in Arabidopsis)	RNA.regulation of transcription.AS2,Lateral Organ Boundaries Gene Family	weakly similar to ( 167) AT3G02550 | Symbols: LBD41 | LBD41 (LOB DOMAIN-CONTAINING PROTEIN 41) | chr3:536747-537650 REVERSEmoderately similar to ( 201) loc_os01g32770 12001.m09596 protein seed specific protein Bn15D17A, putative, expressed seq=cds; coord=8:123322670..123323521:-1; parent_gene=AC234149.1_FG002	1.79852	-	-	-	gi|195626864|gb|ACG35262.1|/3.71208e-60/seed specific protein Bn15D17A [Zea mays]
GRMZM2G003853_T02	GRMZM2G003853	synergid (balst in Arabidopsis)/egg (balst in Arabidopsis)/central cell (balst in Arabidopsis)	hormone metabolism.brassinosteroid.synthesis-degradation.sterols.HYD1	weakly similar to ( 172) AT1G20050 | Symbols: HYD1 | HYD1 (HYDRA1); C-8 sterol isomerase | chr1:6949160-6950135 FORWARDmoderately similar to ( 224) EBP_ORYSA Probable 3-beta-hydroxysteroid-Delta(8),Delta(7)-isomerase (EC 5.3.3.5) (Cholestenol Delta-isomerase) (Delta(8)-Delta(7) sterol isomerase) (D8-D7 sterol isomerase) - Oryza sativa (Rice)moderately similar to ( 224) loc_os01g01369 12001.m15088…	1.11524	GO:0031224//intrinsic to membrane;GO:0043231//intracellular membrane-bounded organelle	GO:0016863//intramolecular oxidoreductase activity, transposing C=C bonds	GO:0006066//alcohol metabolic process	gi|195635067|gb|ACG37002.1|/5.67008e-68/3-beta-hydroxysteroid-delta-isomerase [Zea mays]
GRMZM2G006047_T02	GRMZM2G006047	synergid (balst in Arabidopsis)/egg (balst in Arabidopsis)/central cell (balst in Arabidopsis)	misc.protease inhibitor/seed storage/lipid transfer protein (LTP) family protein	very weakly similar to (85.9) AT3G22600 | Symbols: | protease inhibitor/seed storage/lipid transfer protein (LTP) family protein | chr3:8006711-8007397 REVERSEweakly similar to ( 115) loc_os03g57970 12003.m10709 protein lipid transfer protein, putative, expressed seq=cds; coord=1:287110810..287111891:-1; parent_gene=GRMZM2G006047	1.57556	-	GO:0005488//binding	GO:0006810//transport	gi|226500518|ref|NP_001152425.1|/3.469e-42/LOC100286065 precursor [Zea mays]
GRMZM2G012416_T01	GRMZM2G012416	synergid (balst in Arabidopsis)/egg (balst in Arabidopsis)/central cell (balst in Arabidopsis)	protein.synthesis.initiation	highly similar to ( 657) AT5G36230 | Symbols: | eIF4-gamma/eIF5/eIF2-epsilon domain-containing protein | chr5:14273519-14276773 FORWARDhighly similar to ( 749) loc_os11g21990 12011.m28792 protein eukaryotic initiation factor 5C CG2922-PF, isoform F, putative, expressed seq=cds; coord=4:204054112..204064316:1; parent_gene=GRMZM2G012416	1.46589	GO:0044464//cell part	GO:0008135//translation factor activity, nucleic acid binding	GO:0006413//translational initiation	gi|253761590|ref|XP_002489171.1|/0/hypothetical protein SORBIDRAFT_0014s003010 [Sorghum bicolor]
GRMZM2G015804_T02	GRMZM2G015804	synergid (balst in Arabidopsis)/egg (balst in Arabidopsis)/central cell (balst in Arabidopsis)	misc.gluco-, galacto- and mannosidases	highly similar to ( 694) AT1G26560 | Symbols: BGLU40 | BGLU40 (BETA GLUCOSIDASE 40); catalytic/ cation binding / hydrolase, hydrolyzing O-glycosyl compounds | chr1:9178513-9181726 FORWARDmoderately similar to ( 379) BGLC_MAIZE Beta-glucosidase, chloroplast precursor (EC 3.2.1.21) (Gentiobiase) (Cellobiase) (Beta-D-glucoside glucohydrolase) - Zea mays (Maize)highly similar to ( 815) loc_os03g11420…	1.48329	GO:0005576//extracellular region;GO:0031410//cytoplasmic vesicle;GO:0009536//plastid	GO:0016798//hydrolase activity, acting on glycosyl bonds;GO:0043167//ion binding	GO:0044238//primary metabolic process	gi|242036513|ref|XP_002465651.1|/0/hypothetical protein SORBIDRAFT_01g043030 [Sorghum bicolor]
GRMZM2G015804_T03	GRMZM2G015804	synergid (balst in Arabidopsis)/egg (balst in Arabidopsis)/central cell (balst in Arabidopsis)	misc.gluco-, galacto- and mannosidases	highly similar to ( 557) AT1G26560 | Symbols: BGLU40 | BGLU40 (BETA GLUCOSIDASE 40); catalytic/ cation binding / hydrolase, hydrolyzing O-glycosyl compounds | chr1:9178513-9181726 FORWARDmoderately similar to ( 321) MYRO_BRANA Myrosinase precursor (EC 3.2.1.147) (Sinigrinase) (Thioglucosidase) - Brassica napus (Rape)highly similar to ( 649) loc_os03g11420 12003.m06593 protein non-cyanogenic beta-…	1.57002	GO:0005576//extracellular region;GO:0031410//cytoplasmic vesicle;GO:0009536//plastid	GO:0016798//hydrolase activity, acting on glycosyl bonds;GO:0043167//ion binding	GO:0044238//primary metabolic process	gi|242036513|ref|XP_002465651.1|/0/hypothetical protein SORBIDRAFT_01g043030 [Sorghum bicolor]
GRMZM2G017382_T01	GRMZM2G017382	synergid (balst in Arabidopsis)/egg (balst in Arabidopsis)/central cell (balst in Arabidopsis)	lipid metabolism.FA synthesis and FA elongation.ACP thioesterase	moderately similar to ( 302) AT1G08510 | Symbols: FATB | FATB (fatty acyl-ACP thioesterases B); acyl carrier/ acyl-[acyl-carrier-protein] hydrolase | chr1:2691546-2693409 REVERSEmoderately similar to ( 297) FATB_GOSHI Myristoyl-acyl carrier protein thioesterase, chloroplast precursor (EC 3.1.2.-) (16:0-acyl-carrier protein thioesterase) (16:0-ACP thioesterase) (Acyl-[acyl-carrier-protein] hydrola…	1.78883	-	GO:0016787//hydrolase activity	-	gi|226529781|ref|NP_001151014.1|/4.28118e-172/LOC100284647 [Zea mays]
GRMZM2G027741_T02	GRMZM2G027741	synergid (balst in Arabidopsis)/egg (balst in Arabidopsis)/central cell (balst in Arabidopsis)	cell.vesicle transport	moderately similar to ( 486) AT5G16880 | Symbols: | VHS domain-containing protein / GAT domain-containing protein | chr5:5549658-5551274 FORWARDhighly similar to ( 631) loc_os02g46962 12002.m100323 protein protein transporter, putative, expressed seq=cds; coord=5:199376854..199380527:1; parent_gene=GRMZM2G027741	1.06413	GO:0016020//membrane	GO:0022892	GO:0048193//Golgi vesicle transport;GO:0015031//protein transport	gi|194706084|gb|ACF87126.1|/0/unknown [Zea mays]
GRMZM2G028366_T01	GRMZM2G028366	synergid (balst in Arabidopsis)/egg (balst in Arabidopsis)/central cell (balst in Arabidopsis)	protein.synthesis.initiation	moderately similar to ( 336) AT1G54270 | Symbols: EIF4A-2 | EIF4A-2; ATP-dependent helicase/ translation initiation factor | chr1:20260495-20262018 FORWARDmoderately similar to ( 350) IF410_TOBAC Eukaryotic initiation factor 4A-10 (EC 3.6.1.-) (ATP-dependent RNA helicase eIF4A-10) (eIF-4A-10) - Nicotiana tabacum (Common tobacco)highly similar to ( 563) loc_os02g12840 12002.m06531 protein helicase…	2.18872	-	GO:0003676//nucleic acid binding;GO:0016787//hydrolase activity	-	gi|242060998|ref|XP_002451788.1|/0/hypothetical protein SORBIDRAFT_04g007820 [Sorghum bicolor]
GRMZM2G029716_T01	GRMZM2G029716	synergid (balst in Arabidopsis)/egg (balst in Arabidopsis)/central cell (balst in Arabidopsis)	transport.p- and v-ATPases	moderately similar to ( 439) AT3G12740 | Symbols: ALIS1 | ALIS1 (ALA-INTERACTING SUBUNIT 1); phospholipid transporter | chr3:4049739-4051561 FORWARDhighly similar to ( 539) loc_os05g45370 12005.m08662 protein cell division control protein 50, putative, expressed seq=cds; coord=6:159679202..159681463:1; parent_gene=GRMZM2G029716	1.94178	GO:0044464//cell part	-	GO:0009987//cellular process	gi|293333228|ref|NP_001170484.1|/0/uncharacterized protein LOC100384483 [Zea mays]
GRMZM2G032711_T01	GRMZM2G032711	synergid (balst in Arabidopsis)/egg (balst in Arabidopsis)/central cell (balst in Arabidopsis)	development.unspecified	moderately similar to ( 425) AT5G58230 | Symbols: MSI1, MEE70, ATMSI1 | MSI1 (MULTICOPY SUPRESSOR OF IRA1); protein binding | chr5:23556112-23557994 FORWARDhighly similar to ( 609) loc_os09g36900 12009.m06639 protein WD-40 repeat protein MSI1, putative, expressed seq=cds; coord=7:175560167..175567842:-1; parent_gene=GRMZM2G032711	1.35179	GO:0043234//protein complex;GO:0009536//plastid	GO:0005488//binding;GO:0016740//transferase activity	GO:0048827//phyllome development;GO:0051726//regulation of cell cycle;GO:0048229//gametophyte development;GO:0009908//flower development;GO:0040029//regulation of gene expression, epigenetic;GO:0035315//hair cell differentiation;GO:0006338//chromatin remodeling	gi|195624486|gb|ACG34073.1|/0/WD-40 repeat protein MSI1 [Zea mays]
GRMZM2G035542_T01	GRMZM2G035542	synergid (balst in Arabidopsis)/egg (balst in Arabidopsis)/central cell (balst in Arabidopsis)	transport.amino acids	nearly identical (1012) AT1G15690 | Symbols: AVP1, ATAVP3, AVP-3 | AVP1; ATPase/ hydrogen-translocating pyrophosphatase | chr1:5399115-5402185 FORWARDnearly identical (1003) AVP_HORVU Pyrophosphate-energized vacuolar membrane proton pump (EC 3.6.1.1) (Pyrophosphate-energized inorganic pyrophosphatase) (H(+)-PPase) - Hordeum vulgare (Barley)nearly identical (1119) loc_os01g23580 12001.m08831 prote…	2.76042	GO:0000325//plant-type vacuole;GO:0031410//cytoplasmic vesicle;GO:0009526//plastid envelope;GO:0031090//organelle membrane	GO:0016491//oxidoreductase activity;GO:0016462//pyrophosphatase activity;GO:0015405	GO:0048827//phyllome development;GO:0060918//auxin transport;GO:0006818//hydrogen transport;GO:0006970//response to osmotic stress	gi|242052883|ref|XP_002455587.1|/0/hypothetical protein SORBIDRAFT_03g013530 [Sorghum bicolor]
GRMZM2G038375_T03	GRMZM2G038375	synergid (balst in Arabidopsis)/egg (balst in Arabidopsis)/central cell (balst in Arabidopsis)	protein.targeting.mitochondria	weakly similar to ( 182) AT2G42210 | Symbols: ATOEP16-3, OEP16-3 | mitochondrial import inner membrane translocase subunit Tim17/Tim22/Tim23 family protein | chr2:17590642-17591591 FORWARDmoderately similar to ( 224) loc_os02g48610 12002.m77845 protein protein translocase/ protein transporter, putative, expressed seq=cds; coord=5:203215183..203219061:1; parent_gene=GRMZM2G038375	2.10664	GO:0019866//organelle inner membrane;GO:0031968//organelle outer membrane;GO:0031224//intrinsic to membrane;GO:0030964;GO:0009536//plastid	GO:0008320//protein transmembrane transporter activity	GO:0006810//transport	gi|226531308|ref|NP_001147166.1|/4.20712e-69/protein translocase/ protein transporter [Zea mays]
GRMZM2G041472_T01	GRMZM2G041472	synergid (balst in Arabidopsis)/egg (balst in Arabidopsis)/central cell (balst in Arabidopsis)	not assigned.unknown	weakly similar to ( 129) AT1G15420 | Symbols: | unknown protein | chr1:5301794-5303296 REVERSEmoderately similar to ( 270) loc_os01g46060 12001.m10805 protein expressed protein seq=cds; coord=6:162478916..162482044:-1; parent_gene=GRMZM2G041472	1.05992	-	-	-	gi|223974565|gb|ACN31470.1|/1.56466e-101/unknown [Zea mays]
GRMZM2G043162_T01	GRMZM2G043162	synergid (balst in Arabidopsis)/egg (balst in Arabidopsis)/central cell (balst in Arabidopsis)	PS.lightreaction.other electron carrier (ox/red).ferredoxin	weakly similar to ( 148) AT1G10960 | Symbols: ATFD1 | ATFD1 (FERREDOXIN 1); 2 iron, 2 sulfur cluster binding / electron carrier/ iron-sulfur cluster binding | chr1:3664445-3664891 FORWARDweakly similar to ( 160) FER5_MAIZE Ferredoxin-5, chloroplast precursor (Ferredoxin V) (Fd V) - Zea mays (Maize)weakly similar to ( 157) loc_os08g01380 12008.m080056 protein ferredoxin-1, chloroplast precursor, p…	1.01614	GO:0009536//plastid	GO:0051536//iron-sulfur cluster binding;GO:0043169//cation binding	GO:0051234//establishment of localization;GO:0006091//generation of precursor metabolites and energy	gi|259489872|ref|NP_001158976.1|/3.3534e-51/ferredoxin-1 [Zea mays]
GRMZM2G050514_T01	GRMZM2G050514	synergid (balst in Arabidopsis)/egg (balst in Arabidopsis)/central cell (balst in Arabidopsis)	N-metabolism.ammonia metabolism.glutamine synthase	highly similar to ( 631) AT5G37600 | Symbols: ATGSR1, GLN1;1, GSR 1 | ATGSR1; copper ion binding / glutamate-ammonia ligase | chr5:14933574-14935656 REVERSEhighly similar to ( 704) GLNA1_MAIZE Glutamine synthetase root isozyme 1 (EC 6.3.1.2) (Glutamate--ammonia ligase) (GS122) - Zea mays (Maize)highly similar to ( 654) loc_os03g12290 12003.m06679 protein glutamine synthetase root isozyme 5, putat…	1.26514	GO:0044424//intracellular part	GO:0016211//ammonia ligase activity;GO:0032559	GO:0006541//glutamine metabolic process;GO:0071941	gi|162462528|ref|NP_001105538.1|/0/glutamine synthetase root isozyme 1 [Zea mays]
GRMZM2G050885_T01	GRMZM2G050885	synergid (balst in Arabidopsis)/egg (balst in Arabidopsis)/central cell (balst in Arabidopsis)	cell.organisation	highly similar to ( 669) AT1G04780 | Symbols: | ankyrin repeat family protein | chr1:1340891-1342965 REVERSEhighly similar to ( 927) loc_os07g25460 12007.m79895 protein protein binding protein, putative, expressed seq=cds; coord=2:169491451..169495085:1; parent_gene=GRMZM2G050885	1.05409	-	-	-	gi|226503745|ref|NP_001146744.1|/0/uncharacterized protein LOC100280346 [Zea mays]
GRMZM2G050971_T02	GRMZM2G050971	synergid (balst in Arabidopsis)/egg (balst in Arabidopsis)/central cell (balst in Arabidopsis)	secondary metabolism.sulfur-containing	very weakly similar to (89.0) AT1G10500 | Symbols: ATCPISCA | ATCPISCA (chloroplast-localized IscA-like protein); structural molecule | chr1:3460160-3461340 REVERSEweakly similar to ( 115) loc_os06g05400 12006.m31979 protein iron-sulfur assembly protein IscA, chloroplast precursor, putative, expressed seq=cds; coord=9:19919085..19922411:1; parent_gene=GRMZM2G050971	1.80134	GO:0009532//plastid stroma	GO:0051540	GO:0031163	gi|195611042|gb|ACG27351.1|/6.42758e-28/iron-sulfur assembly protein IscA [Zea mays]
GRMZM2G053637_T01	GRMZM2G053637	synergid (balst in Arabidopsis)/egg (balst in Arabidopsis)/central cell (balst in Arabidopsis)	development.late embryogenesis abundant	moderately similar to ( 386) AT2G44060 | Symbols: | late embryogenesis abundant family protein / LEA family protein | chr2:18226922-18227988 FORWARDvery weakly similar to (92.8) LEA14_SOYBN Desiccation protectant protein Lea14 homolog - Glycine max (Soybean)moderately similar to ( 441) loc_os03g62620 12003.m101565 protein salt tolerance protein, putative, expressed seq=cds; coord=7:27804756..2780…	2.52905	-	-	GO:0009414//response to water deprivation	gi|293335165|ref|NP_001169849.1|/3.56197e-161/uncharacterized protein LOC100383741 [Zea mays]
GRMZM2G058220_T01	GRMZM2G058220	synergid (balst in Arabidopsis)/egg (balst in Arabidopsis)/central cell (balst in Arabidopsis)	protein.postranslational modification.kinase.receptor like cytoplasmatic kinase VII	moderately similar to ( 393) AT5G35370 | Symbols: | ATP binding / carbohydrate binding / kinase/ protein kinase/ protein serine/threonine kinase/ protein tyrosine kinase/ sugar binding | chr5:13588564-13591182 REVERSEmoderately similar to ( 206) KPRO_MAIZE Putative receptor protein kinase ZmPK1 precursor (EC 2.7.11.1) - Zea mays (Maize)highly similar to ( 568) loc_os02g52850 12002.m10315 protein …	3.98511	GO:0031410//cytoplasmic vesicle	GO:0004672//protein kinase activity;GO:0000166//nucleotide binding	GO:0009987//cellular process	gi|242066640|ref|XP_002454609.1|/0/hypothetical protein SORBIDRAFT_04g034250 [Sorghum bicolor]
GRMZM2G060451_T01	GRMZM2G060451	synergid (balst in Arabidopsis)/egg (balst in Arabidopsis)/central cell (balst in Arabidopsis)	stress.abiotic.heat	highly similar to ( 630) AT5G42480 | Symbols: ARC6 | ARC6 (ACCUMULATION AND REPLICATION OF CHLOROPLASTS 6); protein binding | chr5:16985295-16988332 FORWARDnearly identical (1064) loc_os02g03000 12002.m100078 protein division protein, putative, expressed seq=cds; coord=4:238329247..238335148:-1; parent_gene=GRMZM2G060451	1.30115	GO:0009528//plastid inner membrane	GO:0005515//protein binding	GO:0009658//chloroplast organization	gi|226505734|ref|NP_001148117.1|/0/LOC100281725 [Zea mays]
GRMZM2G060727_T03	GRMZM2G060727	synergid (balst in Arabidopsis)/egg (balst in Arabidopsis)/central cell (balst in Arabidopsis)	not assigned.unknown	moderately similar to ( 444) AT3G01780 | Symbols: TPLATE | TPLATE; binding | chr3:279171-283399 FORWARDhighly similar to ( 590) loc_os02g55010 12002.m10528 protein expressed protein seq=cds; coord=4:205349536..205394947:-1; parent_gene=GRMZM2G060727	1.16086	GO:0043231//intracellular membrane-bounded organelle	-	-	gi|242070263|ref|XP_002450408.1|/0/hypothetical protein SORBIDRAFT_05g004840 [Sorghum bicolor]
GRMZM2G065073_T02	GRMZM2G065073	synergid (balst in Arabidopsis)/egg (balst in Arabidopsis)/central cell (balst in Arabidopsis)	redox.ascorbate and glutathione.glutathione	highly similar to ( 615) AT4G39640 | Symbols: GGT1 | GGT1 (GAMMA-GLUTAMYL TRANSPEPTIDASE 1); gamma-glutamyltransferase/ glutathione gamma-glutamylcysteinyltransferase | chr4:18400608-18402861 FORWARDhighly similar to ( 801) loc_os04g38450 12004.m08835 protein gamma-glutamyltranspeptidase 1 precursor, putative, expressed seq=cds; coord=2:42784980..42792494:1; parent_gene=GRMZM2G065073	1.47199	GO:0005618//cell wall;GO:0005576//extracellular region;GO:0042579//microbody;GO:0009536//plastid	GO:0047635;GO:0016755	GO:0006950//response to stress;GO:0043094;GO:0006749//glutathione metabolic process	gi|226499210|ref|NP_001147571.1|/0/gamma-glutamyltranspeptidase 1 precursor [Zea mays]
GRMZM2G066555_T02	GRMZM2G066555	synergid (balst in Arabidopsis)/egg (balst in Arabidopsis)/central cell (balst in Arabidopsis)	protein.synthesis.misc ribosomal protein.BRIX	moderately similar to ( 432) AT1G63780 | Symbols: IMP4 | IMP4 | chr1:23665045-23667243 REVERSEhighly similar to ( 510) loc_os08g05880 12008.m04729 protein ribosome production factor 1, putative, expressed seq=cds; coord=5:54732876..54738291:1; parent_gene=GRMZM2G066555	1.78456	GO:0043231//intracellular membrane-bounded organelle;GO:0032991//macromolecular complex	GO:0016876//ligase activity, forming aminoacyl-tRNA and related compounds;GO:0032559	GO:0010467//gene expression	gi|219362803|ref|NP_001136548.1|/1.6325e-162/uncharacterized protein LOC100216667 [Zea mays]
GRMZM2G073077_T01	GRMZM2G073077	synergid (balst in Arabidopsis)/egg (balst in Arabidopsis)/central cell (balst in Arabidopsis)	protein.degradation.ubiquitin.proteasom	moderately similar to ( 293) AT1G64520 | Symbols: RPN12a | RPN12a (Regulatory Particle non-ATPase 12a); peptidase | chr1:23956459-23958120 FORWARDmoderately similar to ( 347) loc_os07g25420 12007.m29149 protein 26S proteasome non-ATPase regulatory subunit 8, putative, expressed seq=cds; coord=10:65096550..65099683:1; parent_gene=GRMZM2G073077	1.25911	GO:0005838//proteasome regulatory particle;GO:0009526//plastid envelope	-	GO:0048827//phyllome development;GO:0009646//response to absence of light;GO:0006511//ubiquitin-dependent protein catabolic process;GO:0009725//response to hormone stimulus;GO:0009718//anthocyanin-containing compound biosynthetic process;GO:0043623//cellular protein complex assembly;GO:0006950//response to stress;GO:0009793//embryo development ending in seed dormancy	gi|226497002|ref|NP_001148851.1|/4.52834e-140/26S proteasome non-ATPase regulatory subunit 8 [Zea mays]
GRMZM2G078389_T01	GRMZM2G078389	synergid (balst in Arabidopsis)/egg (balst in Arabidopsis)/central cell (balst in Arabidopsis)	cell.division	weakly similar to ( 152) AT5G03340 | Symbols: | cell division cycle protein 48, putative / CDC48, putative | chr5:810091-813133 REVERSEweakly similar to ( 153) CDC48_SOYBN Cell division cycle protein 48 homolog (Valosin-containing protein homolog) (VCP) - Glycine max (Soybean)moderately similar to ( 286) loc_os08g01590 12008.m080057 protein expressed protein seq=cds; coord=1:220897931..220903033:…	4.82779	GO:0016020//membrane	GO:0016462//pyrophosphatase activity;GO:0032559	GO:0009987//cellular process	gi|226501496|ref|NP_001143962.1|/4.39838e-99/uncharacterized protein LOC100276777 [Zea mays]
GRMZM2G080603_T03	GRMZM2G080603	synergid (balst in Arabidopsis)/egg (balst in Arabidopsis)/central cell (balst in Arabidopsis)	RNA.RNA binding	weakly similar to ( 138) AT2G21660 | Symbols: ATGRP7, CCR2 | CCR2 (COLD, CIRCADIAN RHYTHM, AND RNA BINDING 2); RNA binding / double-stranded DNA binding / single-stranded DNA binding | chr2:9265477-9266316 REVERSEweakly similar to ( 142) GRPA_MAIZE Glycine-rich RNA-binding, abscisic acid-inducible protein - Zea mays (Maize)weakly similar to ( 152) loc_os12g43600 12012.m26989 protein glycine-rich …	1.58657	-	GO:0005488//binding	-	gi|195626882|gb|ACG35271.1|/2.08235e-43/glycine-rich RNA-binding protein 2 [Zea mays]
GRMZM2G092672_T01	GRMZM2G092672	synergid (balst in Arabidopsis)/egg (balst in Arabidopsis)/central cell (balst in Arabidopsis)	stress.biotic	moderately similar to ( 398) AT5G05850 | Symbols: | leucine-rich repeat family protein | chr5:1762691-1764609 REVERSEvery weakly similar to (89.7) RPK1_IPONI Receptor-like protein kinase precursor (EC 2.7.11.1) - Ipomoea nil (Japanese morning glory) (Pharbitis nil)highly similar to ( 639) loc_os02g38040 12002.m08892 protein protein binding protein, putative, expressed seq=cds; coord=5:179931540..…	2.86378	-	GO:0005488//binding	-	gi|242062170|ref|XP_002452374.1|/0/hypothetical protein SORBIDRAFT_04g024650 [Sorghum bicolor]
GRMZM2G094074_T02	GRMZM2G094074	synergid (balst in Arabidopsis)/egg (balst in Arabidopsis)/central cell (balst in Arabidopsis)	protein.synthesis.ribosomal protein.eukaryotic.40S subunit.S14	moderately similar to ( 231) AT3G52580 | Symbols: | 40S ribosomal protein S14 (RPS14C) | chr3:19503324-19504701 FORWARDmoderately similar to ( 236) RS141_MAIZE 40S ribosomal protein S14 (Clone MCH1) - Zea mays (Maize)moderately similar to ( 242) loc_os02g06700 12002.m06018 protein 40S ribosomal protein S14, putative, expressed seq=cds; coord=6:90306981..90310106:-1; parent_gene=GRMZM2G094074	1.7198	GO:0030529//ribonucleoprotein complex	GO:0005198//structural molecule activity	GO:0010467//gene expression	gi|194696114|gb|ACF82141.1|/1.0139e-63/unknown [Zea mays]
GRMZM2G094712_T06	GRMZM2G094712	synergid (balst in Arabidopsis)/egg (balst in Arabidopsis)/central cell (balst in Arabidopsis)	amino acid metabolism.synthesis.central amino acid metabolism.aspartate	weakly similar to ( 116) AT5G11520 | Symbols: ASP3, YLS4 | ASP3 (ASPARTATE AMINOTRANSFERASE 3); L-aspartate:2-oxoglutarate aminotransferase | chr5:3685257-3687721 REVERSEweakly similar to ( 121) AATC_ORYSA Aspartate aminotransferase, cytoplasmic (EC 2.6.1.1) (Transaminase A) - Oryza sativa (Rice)weakly similar to ( 138) loc_os01g55540 12001.m43201 protein aspartate aminotransferase, cytoplasmic, …	2.07876	GO:0042579//microbody	GO:0008483//transaminase activity;GO:0048037//cofactor binding	GO:0010260//organ senescence	gi|226496407|ref|NP_001141224.1|/1.5588e-37/uncharacterized protein LOC100273311 [Zea mays]
GRMZM2G101480_T01	GRMZM2G101480	synergid (balst in Arabidopsis)/egg (balst in Arabidopsis)/central cell (balst in Arabidopsis)	hormone metabolism.ethylene.induced-regulated-responsive-activated	moderately similar to ( 239) AT3G58680 | Symbols: MBF1B, ATMBF1B | MBF1B (MULTIPROTEIN BRIDGING FACTOR 1B); DNA binding / transcription coactivator | chr3:21707367-21708625 FORWARDmoderately similar to ( 268) loc_os08g27850 12008.m080145 protein endothelial differentiation-related factor 1, putative, expressed seq=cds; coord=4:24613100..24615973:-1; parent_gene=GRMZM2G101480	1.52776	GO:0031981//nuclear lumen	GO:0003712//transcription cofactor activity;GO:0003677//DNA binding	GO:0009725//response to hormone stimulus;GO:0010467//gene expression;GO:0010557//positive regulation of macromolecule biosynthetic process	gi|194695330|gb|ACF81749.1|/1.70474e-73/unknown [Zea mays]
GRMZM2G104017_T04	GRMZM2G104017	synergid (balst in Arabidopsis)/egg (balst in Arabidopsis)/central cell (balst in Arabidopsis)	cell.organisation	highly similar to ( 743) AT5G09810 | Symbols: ACT2, ACT7 | ACT7 (ACTIN 7); structural constituent of cytoskeleton | chr5:3052809-3054220 FORWARDhighly similar to ( 743) ACT11_SOLTU Actin-97 - Solanum tuberosum (Potato)highly similar to ( 753) loc_os05g01600 12005.m27520 protein actin-97, putative, expressed seq=cds; coord=6:41187649..41190516:-1; parent_gene=GRMZM2G104017	1.18236	GO:0030312//external encapsulating structure;GO:0031981//nuclear lumen;GO:0015629//actin cytoskeleton;GO:0016020//membrane	GO:0017111//nucleoside-triphosphatase activity;GO:0005198//structural molecule activity;GO:0032559	GO:0009314//response to radiation;GO:0009725//response to hormone stimulus;GO:0009913//epidermal cell differentiation;GO:0048588//developmental cell growth;GO:0006950//response to stress	gi|212274479|ref|NP_001130463.1|/0/uncharacterized protein LOC100191561 [Zea mays]
GRMZM2G107629_T03	GRMZM2G107629	synergid (balst in Arabidopsis)/egg (balst in Arabidopsis)/central cell (balst in Arabidopsis)	stress.abiotic.drought/salt	highly similar to ( 866) AT4G14360 | Symbols: | dehydration-responsive protein-related | chr4:8267869-8270191 REVERSEnearly identical (1075) loc_os10g33720 12010.m21920 protein ankyrin-like protein, putative, expressed seq=cds; coord=1:231698422..231704259:-1; parent_gene=GRMZM2G107629	1.33561	GO:0031410//cytoplasmic vesicle	GO:0016741;GO:0046914//transition metal ion binding	-	gi|293337155|ref|NP_001167736.1|/0/uncharacterized protein LOC100381424 [Zea mays]
GRMZM2G115757_T01	GRMZM2G115757	synergid (balst in Arabidopsis)/egg (balst in Arabidopsis)/central cell (balst in Arabidopsis)	cell.cycle.peptidylprolyl isomerase	moderately similar to ( 231) AT3G25220 | Symbols: FKBP15-1 | FKBP15-1; FK506 binding / peptidyl-prolyl cis-trans isomerase | chr3:9182691-9184463 FORWARDmoderately similar to ( 216) FKB15_VICFA FK506-binding protein 2 precursor (EC 5.2.1.8) (Peptidyl-prolyl cis-trans isomerase) (PPIase) (Rotamase) (15 kDa FKBP) (FKBP-15) - Vicia faba (Broad bean)moderately similar to ( 260) loc_os09g32526 12009.m…	1.11882	GO:0031410//cytoplasmic vesicle	GO:0016859//cis-trans isomerase activity;GO:0005527//macrolide binding	GO:0044267//cellular protein metabolic process	gi|226531265|ref|NP_001148416.1|/8.55086e-81/LOC100282031 precursor [Zea mays]
GRMZM2G117667_T01	GRMZM2G117667	synergid (balst in Arabidopsis)/egg (balst in Arabidopsis)/central cell (balst in Arabidopsis)	misc.GDSL-motif lipase	weakly similar to ( 111) AT5G55050 | Symbols: | GDSL-motif lipase/hydrolase family protein | chr5:22337745-22339741 FORWARDmoderately similar to ( 248) loc_os04g47390 12004.m09684 protein anther-specific proline-rich protein APG, putative seq=cds; coord=10:138072811..138075965:1; parent_gene=GRMZM2G117667	3.57827	-	-	-	gi|38345853|emb|CAD41059.2|/1.24587e-64/OSJNBa0084K11.17 [Oryza sativa Japonica Group]
GRMZM2G119150_T01	GRMZM2G119150	synergid (balst in Arabidopsis)/egg (balst in Arabidopsis)/central cell (balst in Arabidopsis)	amino acid metabolism.synthesis.aromatic aa.phenylalanine and tyrosine	moderately similar to ( 497) AT4G33680 | Symbols: AGD2 | AGD2 (ABERRANT GROWTH AND DEATH 2); L,L-diaminopimelate aminotransferase/ transaminase | chr4:16171847-16174630 REVERSEhighly similar to ( 685) loc_os03g09910 12003.m06445 protein transaminase/ transferase, transferring nitrogenous groups, putative, expressed seq=cds; coord=1:24599397..24603787:-1; parent_gene=GRMZM2G119150	1.80832	GO:0043231//intracellular membrane-bounded organelle	GO:0048037//cofactor binding;GO:0008483//transaminase activity	GO:0008152//metabolic process	gi|242041891|ref|XP_002468340.1|/0/hypothetical protein SORBIDRAFT_01g044130 [Sorghum bicolor]
GRMZM2G121313_T01	GRMZM2G121313	synergid (balst in Arabidopsis)/egg (balst in Arabidopsis)/central cell (balst in Arabidopsis)	protein.degradation.ubiquitin.E3.SCF.SKP	weakly similar to ( 182) AT5G42190 | Symbols: ASK2, SKP1B | ASK2 (ARABIDOPSIS SKP1-LIKE 2); protein binding / ubiquitin-protein ligase | chr5:16854495-16855516 REVERSEmoderately similar to ( 201) loc_os11g26910 12011.m06610 protein SKP1-like protein 1A, putative, expressed seq=cds; coord=3:220733826..220734572:-1; parent_gene=GRMZM2G121313	2.30774	-	GO:0005488//binding	GO:0019941//modification-dependent protein catabolic process	gi|226532770|ref|NP_001152275.1|/2.72094e-67/SKP1-like protein 1A [Zea mays]
GRMZM2G121812_T01	GRMZM2G121812	synergid (balst in Arabidopsis)/egg (balst in Arabidopsis)/central cell (balst in Arabidopsis)	DNA.unspecified	moderately similar to ( 485) AT4G12650 | Symbols: | LOCATED IN: integral to membrane, Golgi apparatus, plasma membrane, vacuole; EXPRESSED IN: 25 plant structures; EXPRESSED DURING: 13 growth stages; CONTAINS InterPro DOMAIN/s: Nonaspanin (TM9SF) (InterPro:IPR004240); BEST Arabidopsis thaliana protein match is: unknown protein (TAIR:AT5G35160.1); Has 983 Blast hits to 980 proteins in 161 species:…	1.09097	GO:0031224//intrinsic to membrane;GO:0031410//cytoplasmic vesicle	-	-	gi|293333302|ref|NP_001167934.1|/0/uncharacterized protein LOC100381648 precursor [Zea mays]
GRMZM2G123807_T01	GRMZM2G123807	synergid (balst in Arabidopsis)/egg (balst in Arabidopsis)/central cell (balst in Arabidopsis)	not assigned.unknown	moderately similar to ( 271) AT3G05000 | Symbols: | transport protein particle (TRAPP) component Bet3 family protein | chr3:1387444-1388697 REVERSEmoderately similar to ( 317) loc_os09g06970 12009.m22227 protein transport protein particle component, Bet3 containing protein, expressed seq=cds; coord=10:111144117..111150837:1; parent_gene=GRMZM2G123807	1.16263	-	GO:0009975//cyclase activity;GO:0005506//iron ion binding	GO:0006164//purine nucleotide biosynthetic process	gi|226528499|ref|NP_001149190.1|/7.98024e-96/transport protein particle component, Bet3 containing protein [Zea mays]
GRMZM2G125356_T01	GRMZM2G125356	synergid (balst in Arabidopsis)/egg (balst in Arabidopsis)/central cell (balst in Arabidopsis)	cell wall.pectin*esterases.PME	moderately similar to ( 438) AT5G49180 | Symbols: | pectinesterase family protein | chr5:19940783-19942876 REVERSEmoderately similar to ( 404) PME1_CITSI Pectinesterase-1 precursor (EC 3.1.1.11) (Pectin methylesterase) (PE) - Citrus sinensis (Sweet orange)highly similar to ( 942) loc_os04g38560 12004.m08845 protein pectinesterase-1 precursor, putative, expressed seq=cds; coord=10:122230413..12223…	2.20692	GO:0030312//external encapsulating structure;GO:0031410//cytoplasmic vesicle	GO:0030234//enzyme regulator activity;GO:0004091//carboxylesterase activity	GO:0071555//cell wall organization	gi|195654969|gb|ACG46952.1|/0/pectinesterase-1 precursor [Zea mays]
GRMZM2G130119_T01	GRMZM2G130119	synergid (balst in Arabidopsis)/egg (balst in Arabidopsis)/central cell (balst in Arabidopsis)	misc.UDP glucosyl and glucoronyl transferases	moderately similar to ( 273) AT3G16520 | Symbols: UGT88A1 | UDP-glucoronosyl/UDP-glucosyl transferase family protein | chr3:5618847-5620833 REVERSEweakly similar to ( 159) UFO3_MAIZE Anthocyanidin 3-O-glucosyltransferase (EC 2.4.1.115) (Flavonol 3-O-glucosyltransferase) (UDP-glucose flavonoid 3-O-glucosyltransferase) (Bronze-1) (Bz-W22 allele) - Zea mays (Maize)highly similar to ( 666) loc_os01g5…	1.20192	GO:0043231//intracellular membrane-bounded organelle	GO:0016757//transferase activity, transferring glycosyl groups	-	gi|242054343|ref|XP_002456317.1|/0/hypothetical protein SORBIDRAFT_03g033880 [Sorghum bicolor]
GRMZM2G132286_T01	GRMZM2G132286	synergid (balst in Arabidopsis)/egg (balst in Arabidopsis)/central cell (balst in Arabidopsis)	RNA.RNA binding	moderately similar to ( 250) AT1G32790 | Symbols: CID11 | RNA-binding protein, putative | chr1:11875028-11877188 REVERSEmoderately similar to ( 266) loc_os08g02330 12008.m04377 protein CID11, putative, expressed seq=cds; coord=10:10556015..10560159:-1; parent_gene=GRMZM2G132286	1.80944	GO:0043231//intracellular membrane-bounded organelle	GO:0005488//binding	-	gi|242080315|ref|XP_002444926.1|/7.13494e-89/hypothetical protein SORBIDRAFT_07g001560 [Sorghum bicolor]
GRMZM2G135073_T01	GRMZM2G135073	synergid (balst in Arabidopsis)/egg (balst in Arabidopsis)/central cell (balst in Arabidopsis)	protein.postranslational modification	highly similar to ( 687) AT1G79640 | Symbols: | ATP binding / kinase/ protein kinase/ protein serine/threonine kinase/ protein tyrosine kinase | chr1:29966913-29971387 REVERSEweakly similar to ( 152) M2K1_ORYSA Mitogen-activated protein kinase kinase 1 (EC 2.7.12.2) (MAP kinase kinase 1) (MAPKK1) (OsMEK1) - Oryza sativa (Rice)highly similar to ( 865) loc_os02g54900 12002.m10518 protein STE20/SPS1…	1.50482	-	GO:0004702//receptor signaling protein serine/threonine kinase activity;GO:0032559	GO:0006464//cellular protein modification process	gi|226493914|ref|NP_001151604.1|/0/STE20/SPS1-related proline-alanine-rich protein kinase [Zea mays]
GRMZM2G137786_T01	GRMZM2G137786	synergid (balst in Arabidopsis)/egg (balst in Arabidopsis)/central cell (balst in Arabidopsis)	secondary metabolism.isoprenoids.terpenoids	highly similar to ( 774) AT2G07050 | Symbols: CAS1 | CAS1 (cycloartenol synthase 1); cycloartenol synthase | chr2:2924629-2930295 FORWARDhighly similar to ( 936) loc_os11g18194 12011.m05894 protein cycloartenol synthase, putative, expressed seq=cds; coord=1:159952147..160015647:-1; parent_gene=GRMZM2G137786	2.26471	GO:0043231//intracellular membrane-bounded organelle	GO:0016853//isomerase activity	-	gi|242084188|ref|XP_002442519.1|/0/hypothetical protein SORBIDRAFT_08g021260 [Sorghum bicolor]
GRMZM2G143317_T01	GRMZM2G143317	synergid (balst in Arabidopsis)/egg (balst in Arabidopsis)/central cell (balst in Arabidopsis)	not assigned.unknown	weakly similar to ( 170) AT3G12870 | Symbols: | unknown protein | chr3:4094417-4095037 REVERSEmoderately similar to ( 252) loc_os03g56700 12003.m10580 protein expressed protein seq=cds; coord=1:284459536..284460455:-1; parent_gene=GRMZM2G143317	1.24919	GO:0044464//cell part	-	-	gi|242037929|ref|XP_002466359.1|/5.29651e-79/hypothetical protein SORBIDRAFT_01g006360 [Sorghum bicolor]
GRMZM2G144155_T02	GRMZM2G144155	synergid (balst in Arabidopsis)/egg (balst in Arabidopsis)/central cell (balst in Arabidopsis)	stress.abiotic.drought/salt	highly similar to ( 874) AT4G19120 | Symbols: ERD3 | ERD3 (early-responsive to dehydration 3) | chr4:10460665-10463034 REVERSEhighly similar to ( 545) loc_os02g45310 12002.m33818 protein ankyrin protein kinase-like, putative, expressed seq=cds; coord=1:107185706..107188719:1; parent_gene=GRMZM2G144155	1.52943	-	GO:0016772//transferase activity, transferring phosphorus-containing groups	-	gi|223949115|gb|ACN28641.1|/0/unknown [Zea mays]
GRMZM2G146778_T02	GRMZM2G146778	synergid (balst in Arabidopsis)/egg (balst in Arabidopsis)/central cell (balst in Arabidopsis)	glycolysis.cytosolic branch.phosphoglycerate mutase	moderately similar to ( 300) AT3G08590 | Symbols: | 2,3-biphosphoglycerate-independent phosphoglycerate mutase, putative / phosphoglyceromutase, putative | chr3:2608683-2611237 REVERSEmoderately similar to ( 343) PMGI_MAIZE 2,3-bisphosphoglycerate-independent phosphoglycerate mutase (EC 5.4.2.1) (Phosphoglyceromutase) (BPG-independent PGAM) (PGAM-I) - Zea mays (Maize)moderately similar to ( 312) …	2.14734	GO:0044424//intracellular part	GO:0046914//transition metal ion binding;GO:0016868//intramolecular transferase activity, phosphotransferases	GO:0050896//response to stimulus;GO:0006007//glucose catabolic process	gi|293336560|ref|NP_001167944.1|/2.72908e-94/uncharacterized protein LOC100381658 [Zea mays]
GRMZM2G148621_T01	GRMZM2G148621	synergid (balst in Arabidopsis)/egg (balst in Arabidopsis)/central cell (balst in Arabidopsis)	cell.cycle	very weakly similar to (91.3) AT3G21870 | Symbols: CYCP2;1 | CYCP2;1 (cyclin p2;1); cyclin-dependent protein kinase | chr3:7703927-7704813 REVERSEweakly similar to ( 144) loc_os04g53680 12004.m10261 protein cyclin-dependent protein kinase, putative, expressed seq=cds; coord=10:143500958..143503047:1; parent_gene=GRMZM2G148621	1.73029	-	-	-	gi|226529119|ref|NP_001151114.1|/3.95603e-74/cyclin-dependent protein kinase [Zea mays]
GRMZM2G152793_T01	GRMZM2G152793	synergid (balst in Arabidopsis)/egg (balst in Arabidopsis)/central cell (balst in Arabidopsis)	signalling.receptor kinases.DUF 26	moderately similar to ( 416) AT5G35370 | Symbols: | ATP binding / carbohydrate binding / kinase/ protein kinase/ protein serine/threonine kinase/ protein tyrosine kinase/ sugar binding | chr5:13588564-13591182 REVERSEmoderately similar to ( 214) KPRO_MAIZE Putative receptor protein kinase ZmPK1 precursor (EC 2.7.11.1) - Zea mays (Maize)nearly identical (1078) loc_os02g52850 12002.m10315 protein A…	2.87725	GO:0031410//cytoplasmic vesicle	GO:0030246//carbohydrate binding;GO:0004672//protein kinase activity;GO:0032559	GO:0006464//cellular protein modification process	gi|242066640|ref|XP_002454609.1|/0/hypothetical protein SORBIDRAFT_04g034250 [Sorghum bicolor]
GRMZM2G154721_T01	GRMZM2G154721	synergid (balst in Arabidopsis)/egg (balst in Arabidopsis)/central cell (balst in Arabidopsis)	not assigned.unknown	weakly similar to ( 177) AT1G17070 | Symbols: | D111/G-patch domain-containing protein | chr1:5837653-5840202 FORWARDweakly similar to ( 182) loc_os01g41670 12001.m10435 protein nucleic acid binding protein, putative seq=cds; coord=10:130277433..130279743:1; parent_gene=GRMZM2G154721	1.10293	-	-	-	gi|242073690|ref|XP_002446781.1|/0/hypothetical protein SORBIDRAFT_06g022360 [Sorghum bicolor]
GRMZM2G156516_T02	GRMZM2G156516	synergid (balst in Arabidopsis)/egg (balst in Arabidopsis)/central cell (balst in Arabidopsis)	amino acid metabolism.degradation.aromatic aa.tyrosine	moderately similar to ( 312) AT4G15940 | Symbols: | fumarylacetoacetate hydrolase family protein | chr4:9038361-9040163 FORWARDmoderately similar to ( 383) loc_os03g61330 12003.m101552 protein fumarylacetoacetate hydrolase domain-containing protein 1, putative, expressed seq=cds; coord=1:295533612..295536934:1; parent_gene=GRMZM2G156516	1.12177	-	GO:0016831//carboxy-lyase activity	-	gi|223947115|gb|ACN27641.1|/3.84184e-117/unknown [Zea mays]
GRMZM2G158277_T02	GRMZM2G158277	synergid (balst in Arabidopsis)/egg (balst in Arabidopsis)/central cell (balst in Arabidopsis)	not assigned.unknown	moderately similar to ( 305) AT1G03900 | Symbols: ATNAP4 | ATNAP4 (Arabidopsis thaliana non-intrinsic ABC protein 4); ATPase, coupled to transmembrane movement of substances / transporter | chr1:991252-992852 FORWARDmoderately similar to ( 402) loc_os10g33630 12010.m065199 protein adaptin ear-binding coat-associated protein 2, putative, expressed seq=cds; coord=5:29321627..29325204:1; parent_gene…	1.00401	GO:0044464//cell part	GO:0015405	GO:0016192//vesicle-mediated transport	gi|242039389|ref|XP_002467089.1|/4.33648e-124/hypothetical protein SORBIDRAFT_01g019420 [Sorghum bicolor]
GRMZM2G160506_T03	GRMZM2G160506	synergid (balst in Arabidopsis)/egg (balst in Arabidopsis)/central cell (balst in Arabidopsis)	cell wall.precursor synthesis.NDP sugar pyrophosphorylase.GDP mannose	highly similar to ( 640) AT2G39770 | Symbols: CYT1, VTC1, SOZ1, EMB101, GMP1 | CYT1 (CYTOKINESIS DEFECTIVE 1); mannose-1-phosphate guanylyltransferase/ nucleotidyltransferase | chr2:16589401-16590741 FORWARDhighly similar to ( 691) loc_os03g16150 12003.m07052 protein mannose-1-phosphate guanyltransferase, putative, expressed seq=cds; coord=1:39110590..39113895:-1; parent_gene=GRMZM2G160506	1.68716	GO:0043231//intracellular membrane-bounded organelle	GO:0008905	GO:0008152//metabolic process	gi|226531245|ref|NP_001142215.1|/0/uncharacterized protein LOC100274383 [Zea mays]
GRMZM2G163283_T01	GRMZM2G163283	synergid (balst in Arabidopsis)/egg (balst in Arabidopsis)/central cell (balst in Arabidopsis)	not assigned.unknown	very weakly similar to (96.3) AT1G56580 | Symbols: | unknown protein | chr1:21198402-21198902 REVERSEweakly similar to ( 194) loc_os05g49790 12005.m09049 protein expressed protein seq=cds; coord=6:165561339..165562060:-1; parent_gene=GRMZM2G163283	2.12236	-	-	-	gi|226532856|ref|NP_001143509.1|/5.39717e-64/uncharacterized protein LOC100276192 [Zea mays]
GRMZM2G164098_T01	GRMZM2G164098	synergid (balst in Arabidopsis)/egg (balst in Arabidopsis)/central cell (balst in Arabidopsis)	development.unspecified	very weakly similar to (84.0) AT5G47060 | Symbols: | senescence-associated protein-related | chr5:19116843-19117639 FORWARDweakly similar to ( 104) loc_os02g46190 12002.m09656 protein conserved hypothetical protein seq=cds; coord=4:156819120..156819766:1; parent_gene=GRMZM2G164098	1.80021	-	-	-	gi|242062892|ref|XP_002452735.1|/7.23968e-44/hypothetical protein SORBIDRAFT_04g031510 [Sorghum bicolor]
GRMZM2G165255_T01	GRMZM2G165255	synergid (balst in Arabidopsis)/egg (balst in Arabidopsis)/central cell (balst in Arabidopsis)	not assigned.unknown	very weakly similar to (99.0) AT2G38480 | Symbols: | integral membrane protein, putative | chr2:16110960-16111694 REVERSEweakly similar to ( 179) loc_os03g60250 12003.m10918 protein expressed protein seq=cds; coord=5:2766676..2767975:1; parent_gene=GRMZM2G165255	2.34689	-	-	-	gi|226509262|ref|NP_001145363.1|/7.51588e-59/uncharacterized protein LOC100278700 [Zea mays]
GRMZM2G167836_T01	GRMZM2G167836	synergid (balst in Arabidopsis)/egg (balst in Arabidopsis)/central cell (balst in Arabidopsis)	cell.vesicle transport	moderately similar to ( 331) AT3G54300 | Symbols: ATVAMP727, VAMP727 | ATVAMP727 (VESICLE-ASSOCIATED MEMBRANE PROTEIN 727) | chr3:20108355-20110127 REVERSEmoderately similar to ( 403) loc_os08g44430 12008.m62034 protein vesicle-associated membrane protein 727, putative, expressed seq=cds; coord=1:204801265..204804192:1; parent_gene=GRMZM2G167836	1.63331	GO:0043234//protein complex;GO:0043231//intracellular membrane-bounded organelle;GO:0031224//intrinsic to membrane;GO:0031410//cytoplasmic vesicle	-	GO:0006605//protein targeting;GO:0006996//organelle organization	gi|219363261|ref|NP_001136721.1|/2.72859e-117/uncharacterized protein LOC100216858 [Zea mays]
GRMZM2G171367_T01	GRMZM2G171367	synergid (balst in Arabidopsis)/egg (balst in Arabidopsis)/central cell (balst in Arabidopsis)	signalling.phosphinositides.phosphatidylinositol-4-phosphate 5-kinase	moderately similar to ( 295) AT1G21920 | Symbols: | MORN (Membrane Occupation and Recognition Nexus) repeat-containing protein /phosphatidylinositol-4-phosphate 5-kinase-related | chr1:7704454-7705866 REVERSEvery weakly similar to (92.8) PI5K1_ORYSA Phosphatidylinositol-4-phosphate 5-kinase 1 precursor (EC 2.7.1.68) (1-phosphatidylinositol-4-phosphate kinase) (PIP5K) (PtdIns(4)P-5-kinase) (Diphos…	1.75051	-	-	-	gi|357158721|ref|XP_003578219.1|/1.07909e-95/PREDICTED: junctophilin-4-like [Brachypodium distachyon]
GRMZM2G173742_T01	GRMZM2G173742	synergid (balst in Arabidopsis)/egg (balst in Arabidopsis)/central cell (balst in Arabidopsis)	stress	moderately similar to ( 237) AT5G05350 | Symbols: | unknown protein | chr5:1585757-1587337 FORWARDmoderately similar to ( 490) loc_os11g01850 12011.m28641 protein SAG20, putative, expressed seq=cds; coord=10:1320805..1322716:-1; parent_gene=GRMZM2G173742	1.00179	-	-	-	gi|226499052|ref|NP_001141148.1|/0/uncharacterized protein LOC100273234 [Zea mays]
GRMZM2G178729_T01	GRMZM2G178729	synergid (balst in Arabidopsis)/egg (balst in Arabidopsis)/central cell (balst in Arabidopsis)	RNA.regulation of transcription.C2H2 zinc finger family	very weakly similar to (90.5) AT3G49930 | Symbols: | zinc finger (C2H2 type) family protein | chr3:18510246-18510893 FORWARDvery weakly similar to (80.1) ZFP1_WHEAT Zinc-finger protein 1 (WZF1) - Triticum aestivum (Wheat)weakly similar to ( 135) loc_os07g39960 12007.m08238 protein zinc finger, C2H2 type family protein seq=cds; coord=3:209259527..209260240:1; parent_gene=GRMZM2G178729	2.14614	-	-	-	gi|242046152|ref|XP_002460947.1|/7.29646e-45/hypothetical protein SORBIDRAFT_02g038000 [Sorghum bicolor]
GRMZM2G178734_T01	GRMZM2G178734	synergid (balst in Arabidopsis)/egg (balst in Arabidopsis)/central cell (balst in Arabidopsis)	transport.metabolite transporters at the envelope membrane	moderately similar to ( 359) AT5G25400 | Symbols: | phosphate translocator-related | chr5:8823283-8824332 FORWARDmoderately similar to ( 420) loc_os12g04170 12012.m04412 protein plastidic phosphate translocator-like protein1, putative, expressed seq=cds; coord=10:2005967..2007702:1; parent_gene=GRMZM2G178734	2.31705	GO:0044464//cell part	-	-	gi|242084542|ref|XP_002442696.1|/1.0485e-125/hypothetical protein SORBIDRAFT_08g001300 [Sorghum bicolor]
GRMZM2G179789_T01	GRMZM2G179789	synergid (balst in Arabidopsis)/egg (balst in Arabidopsis)/central cell (balst in Arabidopsis)	protein.postranslational modification	weakly similar to ( 154) AT1G12680 | Symbols: PEPKR2 | PEPKR2 (Phosphoenolpyruvate carboxylase-related kinase 2); ATP binding / kinase/ protein kinase/ protein serine/threonine kinase | chr1:4320123-4322269 REVERSEvery weakly similar to (96.3) CDPK2_ORYSA Calcium-dependent protein kinase, isoform 2 (EC 2.7.11.1) (CDPK 2) - Oryza sativa (Rice)moderately similar to ( 201) loc_os09g29170 12009.m2199…	1.00547	-	GO:0005488//binding;GO:0004672//protein kinase activity	-	gi|219362635|ref|NP_001136999.1|/1.87529e-91/uncharacterized protein LOC100217162 [Zea mays]
GRMZM2G181236_T01	GRMZM2G181236	synergid (balst in Arabidopsis)/egg (balst in Arabidopsis)/central cell (balst in Arabidopsis)	misc.cytochrome P450	moderately similar to ( 422) AT2G12190 | Symbols: | cytochrome P450, putative | chr2:4891807-4893345 REVERSEmoderately similar to ( 293) C77A3_SOYBN Cytochrome P450 77A3 (EC 1.14.-.-) - Glycine max (Soybean)highly similar to ( 655) loc_os10g37110 12010.m06511 protein transposon protein, putative, unclassified, expressed seq=cds; coord=1:223784008..223786458:-1; parent_gene=GRMZM2G181236	3.51178	-	GO:0016491//oxidoreductase activity;GO:0005506//iron ion binding	GO:0006091//generation of precursor metabolites and energy	gi|226501574|ref|NP_001146067.1|/0/uncharacterized protein LOC100279598 [Zea mays]
GRMZM2G306079_T02	GRMZM2G306079	synergid (balst in Arabidopsis)/egg (balst in Arabidopsis)/central cell (balst in Arabidopsis)	protein.degradation.ubiquitin.E3.RING	weakly similar to ( 119) AT1G19310 | Symbols: | zinc finger (C3HC4-type RING finger) family protein | chr1:6676424-6677104 REVERSEweakly similar to ( 140) loc_os01g61420 12001.m12268 protein zinc finger, C3HC4 type family protein, expressed seq=cds; coord=1:106496170..106499236:1; parent_gene=GRMZM2G306079	1.08715	GO:0043231//intracellular membrane-bounded organelle	GO:0005488//binding	-	gi|212275015|ref|NP_001130302.1|/0/uncharacterized protein LOC100191396 [Zea mays]
GRMZM2G321404_T04	GRMZM2G321404	synergid (balst in Arabidopsis)/egg (balst in Arabidopsis)/central cell (balst in Arabidopsis)	protein.targeting.mitochondria	moderately similar to ( 209) AT2G37410 | Symbols: ATTIM17-2, TIM17 | ATTIM17-2; P-P-bond-hydrolysis-driven protein transmembrane transporter/ protein transporter | chr2:15698119-15698850 REVERSEmoderately similar to ( 262) loc_os07g41330 12007.m08369 protein mitochondrial import inner membrane translocase subunit Tim17, putative, expressed seq=cds; coord=2:210451559..210452646:1; parent_gene=GRMZ…	1.23235	GO:0005743//mitochondrial inner membrane;GO:0044425//membrane part	GO:0022892	-	gi|223944985|gb|ACN26576.1|/1.3201e-90/unknown [Zea mays]
GRMZM2G334734_T01	GRMZM2G334734	synergid (balst in Arabidopsis)/egg (balst in Arabidopsis)/central cell (balst in Arabidopsis)	not assigned.unknown	weakly similar to ( 134) AT1G09310 | Symbols: | unknown protein | chr1:3009109-3009648 FORWARDmoderately similar to ( 251) loc_os07g02850 12007.m04756 protein expressed protein seq=cds; coord=2:4414922..4415572:-1; parent_gene=GRMZM2G334734	5.88456	-	-	-	gi|226503157|ref|NP_001145335.1|/1.28973e-71/uncharacterized protein LOC100278663 [Zea mays]
GRMZM2G340756_T01	GRMZM2G340756	synergid (balst in Arabidopsis)/egg (balst in Arabidopsis)/central cell (balst in Arabidopsis)	RNA.regulation of transcription.Chromatin Remodeling Factors	weakly similar to ( 171) AT1G21700 | Symbols: ATSWI3C, CHB4 | ATSWI3C (SWITCH/SUCROSE NONFERMENTING 3C); DNA binding | chr1:7620156-7623978 REVERSEmoderately similar to ( 272) loc_os11g08080 12011.m28748 protein SWIRM domain containing protein, expressed seq=cds; coord=3:139730038..139736635:-1; parent_gene=GRMZM2G340756	1.06561	GO:0005634//nucleus	GO:0003676//nucleic acid binding	GO:0010468//regulation of gene expression	gi|357160691|ref|XP_003578845.1|/0/PREDICTED: SWI/SNF complex subunit SWI3C-like [Brachypodium distachyon]
GRMZM2G346095_T01	GRMZM2G346095	synergid (balst in Arabidopsis)/egg (balst in Arabidopsis)/central cell (balst in Arabidopsis)	secondary metabolism.flavonoids.chalcones	moderately similar to ( 347) AT5G13930 | Symbols: CHS, TT4, ATCHS | TT4 (TRANSPARENT TESTA 4); naringenin-chalcone synthase | chr5:4488762-4490035 FORWARDmoderately similar to ( 366) CHSY_VITVI Chalcone synthase (EC 2.3.1.74) (Naringenin-chalcone synthase) - Vitis vinifera (Grape)moderately similar to ( 429) loc_os07g31770 12007.m07444 protein chalcone synthase, putative, expressed seq=cds; coord…	1.52952	-	GO:0016747//transferase activity, transferring acyl groups other than amino-acyl groups	GO:0008152//metabolic process	gi|242050306|ref|XP_002462897.1|/5.67811e-134/hypothetical protein SORBIDRAFT_02g034020 [Sorghum bicolor]
GRMZM2G350918_T01	GRMZM2G350918	synergid (balst in Arabidopsis)/egg (balst in Arabidopsis)/central cell (balst in Arabidopsis)	signalling.receptor kinases.leucine rich repeat XI	highly similar to ( 789) AT5G25930 | Symbols: | leucine-rich repeat family protein / protein kinase family protein | chr5:9050880-9053978 FORWARDmoderately similar to ( 394) RPK1_IPONI Receptor-like protein kinase precursor (EC 2.7.11.1) - Ipomoea nil (Japanese morning glory) (Pharbitis nil)nearly identical (1358) loc_os06g36270 12006.m091721 protein receptor-like protein kinase 5 precursor, puta…	1.4526	GO:0031410//cytoplasmic vesicle	GO:0004672//protein kinase activity;GO:0032559	GO:0006464//cellular protein modification process	gi|242093326|ref|XP_002437153.1|/0/hypothetical protein SORBIDRAFT_10g022060 [Sorghum bicolor]
GRMZM2G358987_T01	GRMZM2G358987	synergid (balst in Arabidopsis)/egg (balst in Arabidopsis)/central cell (balst in Arabidopsis)	protein.degradation.ubiquitin.E3.RING	very weakly similar to (87.0) AT1G72310 | Symbols: ATL3 | ATL3; protein binding / zinc ion binding | chr1:27226405-27227379 FORWARDvery weakly similar to (80.9) EL5_ORYSA E3 ubiquitin-protein ligase EL5 (EC 6.3.2.-) - Oryza sativa (Rice)weakly similar to ( 154) loc_os07g42610 12007.m08493 protein ring-H2 zinc finger protein, putative, expressed seq=cds; coord=2:211590201..211591615:-1; parent_gen…	1.89512	-	-	-	gi|55741059|gb|AAV64201.1|/3.24482e-58/ring-H2 zinc finger protein [Zea mays]
GRMZM2G401970_T01	GRMZM2G401970	synergid (balst in Arabidopsis)/egg (balst in Arabidopsis)/central cell (balst in Arabidopsis)	glycolysis.unclear/dually targeted.phosphofructokinase (PFK)	highly similar to ( 686) AT4G26270 | Symbols: PFK3 | PFK3 (PHOSPHOFRUCTOKINASE 3); 6-phosphofructokinase | chr4:13301094-13304030 REVERSEvery weakly similar to (80.9) PFPB_RICCO Pyrophosphate--fructose 6-phosphate 1-phosphotransferase subunit beta (EC 2.7.1.90) (PFP) (6-phosphofructokinase, pyrophosphate dependent) (Pyrophosphate-dependent 6-phosphofructose-1-kinase) (PPi-PFK) - Ricinus communis …	25.5012	GO:0043234//protein complex	GO:0008443//phosphofructokinase activity;GO:0032559	GO:0006007//glucose catabolic process	gi|242087165|ref|XP_002439415.1|/0/hypothetical protein SORBIDRAFT_09g006030 [Sorghum bicolor]
GRMZM2G423202_T01	GRMZM2G423202	synergid (balst in Arabidopsis)/egg (balst in Arabidopsis)/central cell (balst in Arabidopsis)	not assigned.unknown	moderately similar to ( 225) AT4G21700 | Symbols: | unknown protein | chr4:11529956-11532844 FORWARDhighly similar to ( 707) loc_os01g48620 12001.m11052 protein expressed protein seq=cds; coord=3:208969066..208971846:-1; parent_gene=GRMZM2G423202	8.81605	GO:0044464//cell part	-	-	gi|242053983|ref|XP_002456137.1|/0/hypothetical protein SORBIDRAFT_03g031090 [Sorghum bicolor]
GRMZM2G423863_T01	GRMZM2G423863	synergid (balst in Arabidopsis)/egg (balst in Arabidopsis)/central cell (balst in Arabidopsis)	signalling.in sugar and nutrient physiology	weakly similar to ( 146) AT3G54040 | Symbols: | photoassimilate-responsive protein-related | chr3:20014032-20015299 REVERSE seq=cds; coord=6:139452535..139454641:-1; parent_gene=GRMZM2G423863	3.85892	-	-	-	gi|242087601|ref|XP_002439633.1|/1.05401e-72/hypothetical protein SORBIDRAFT_09g017290 [Sorghum bicolor]
GRMZM2G434388_T01	GRMZM2G434388	synergid (balst in Arabidopsis)/egg (balst in Arabidopsis)/central cell (balst in Arabidopsis)	transport.misc	moderately similar to ( 489) AT1G78130 | Symbols: UNE2 | UNE2 (unfertilized embryo sac 2); carbohydrate transmembrane transporter/ sugar:hydrogen symporter | chr1:29400171-29401814 FORWARDhighly similar to ( 673) loc_os09g20500 12009.m05257 protein carbohydrate transporter/ sugar porter/ transporter, putative, expressed seq=cds; coord=7:100886507..100889308:-1; parent_gene=GRMZM2G434388	1.99768	-	-	GO:0006810//transport	gi|242049104|ref|XP_002462296.1|/0/hypothetical protein SORBIDRAFT_02g023380 [Sorghum bicolor]
GRMZM2G457147_T02	GRMZM2G457147	synergid (balst in Arabidopsis)/egg (balst in Arabidopsis)/central cell (balst in Arabidopsis)	not assigned.unknown	moderately similar to ( 276) AT1G29790 | Symbols: | FUNCTIONS IN: molecular_function unknown; INVOLVED IN: biological_process unknown; LOCATED IN: Golgi apparatus, plasma membrane; EXPRESSED IN: 23 plant structures; EXPRESSED DURING: 12 growth stages; BEST Arabidopsis thaliana protein match is: methyltransferase (TAIR:AT5G40830.2); Has 127 Blast hits to 127 proteins in 12 species: Archae - 0; Bac…	1.56681	-	GO:0016741	-	gi|212723850|ref|NP_001132903.1|/0/uncharacterized protein LOC100194402 [Zea mays]
GRMZM2G462258_T01	GRMZM2G462258	synergid (balst in Arabidopsis)/egg (balst in Arabidopsis)/central cell (balst in Arabidopsis)	major CHO metabolism.degradation.starch.starch cleavage	weakly similar to ( 117) AT5G18670 | Symbols: BMY3, BAM9 | BMY3; beta-amylase/ catalytic/ cation binding | chr5:6226138-6227999 FORWARDweakly similar to ( 186) loc_os03g22790 12003.m07677 protein beta-amylase, putative, expressed seq=cds; coord=2:19253013..19255143:-1; parent_gene=GRMZM2G462258	4.72945	GO:0043231//intracellular membrane-bounded organelle	GO:0016798//hydrolase activity, acting on glycosyl bonds	GO:0005975//carbohydrate metabolic process	gi|226500784|ref|NP_001151271.1|/1.33155e-67/beta-amylase [Zea mays]
GRMZM2G478160_T01	GRMZM2G478160	synergid (balst in Arabidopsis)/egg (balst in Arabidopsis)/central cell (balst in Arabidopsis)	signalling.calcium	very weakly similar to (92.4) AT2G44310 | Symbols: | calcium-binding EF hand family protein | chr2:18309285-18309713 FORWARDweakly similar to ( 166) loc_os09g30490 12009.m06209 protein EF hand family protein, expressed seq=cds; coord=7:132107566..132108467:1; parent_gene=GRMZM2G478160	1.69883	-	-	-	gi|242045134|ref|XP_002460438.1|/5.71782e-46/hypothetical protein SORBIDRAFT_02g028130 [Sorghum bicolor]
GRMZM5G862017_T01	GRMZM5G862017	synergid (balst in Arabidopsis)/egg (balst in Arabidopsis)/central cell (balst in Arabidopsis)	protein.synthesis.ribosomal protein.prokaryotic.unknown organellar.50S subunit.L10A	weakly similar to ( 194) AT5G22440 | Symbols: | 60S ribosomal protein L10A (RPL10aC) | chr5:7435328-7436486 REVERSEweakly similar to ( 140) RL10A_CHLRE 60S ribosomal protein L10a - Chlamydomonas reinhardtiimoderately similar to ( 218) loc_os08g44380 12008.m26793 protein 60S ribosomal protein L10a-1, putative, expressed seq=cds; coord=9:90031364..90037376:-1; parent_gene=GRMZM5G862017	1.27979	-	-	-	gi|212721532|ref|NP_001131611.1|/2.11863e-59/uncharacterized protein LOC100192963 [Zea mays]
AC185478.4_FGT005	AC185478.4		not assigned.unknown	seq=cds; coord=4:181401680..181402444:-1; parent_gene=AC185478.4_FG005	1.75268	-	-	-	gi|242065958|ref|XP_002454268.1|/2.10143e-40/hypothetical protein SORBIDRAFT_04g027770 [Sorghum bicolor]
AC186195.4_FGT001	AC186195.4		not assigned.unknown	very weakly similar to (87.4) loc_os02g51200 12002.m10154 protein retrotransposon protein, putative, unclassified seq=cds; coord=2:13087811..13089756:-1; parent_gene=AC186195.4_FG001	1.92183	-	GO:0005488//binding	-	gi|242068609|ref|XP_002449581.1|/1.8414e-55/hypothetical protein SORBIDRAFT_05g019580 [Sorghum bicolor]
AC186417.3_FGT006	AC186417.3		not assigned.unknown	seq=cds; coord=1:13087620..13088273:1; parent_gene=AC186417.3_FG006	2.05015	-	-	-	gi|242049218|ref|XP_002462353.1|/5.19524e-20/hypothetical protein SORBIDRAFT_02g024280 [Sorghum bicolor]
AC189771.3_FGT001	AC189771.3		not assigned.unknown	seq=cds; coord=5:73295006..73295440:-1; parent_gene=AC189771.3_FG001	1.76131	-	-	-	gi|226501548|ref|NP_001143891.1|/2.06635e-67/uncharacterized protein LOC100276692 precursor [Zea mays]
AC190811.1_FGT003	AC190811.1		not assigned.unknown	seq=cds; coord=2:145421716..145422519:1; parent_gene=AC190811.1_FG003	1.66766	-	-	-	gi|226494496|ref|NP_001151731.1|/1.32701e-40/transcriptional regulatory protein algP precursor [Zea mays]
AC191070.3_FGT006	AC191070.3		not assigned.unknown	seq=cds; coord=4:42444474..42446902:-1; parent_gene=AC191070.3_FG006	51.758	-	-	-	gi|238008192|gb|ACR35131.1|/5.09214e-17/unknown [Zea mays]
AC191778.3_FGT001	AC191778.3		not assigned.unknown	seq=cds; coord=4:17874484..17875002:1; parent_gene=AC191778.3_FG001	2.58343	-	-	-	-
AC193423.3_FGT003	AC193423.3		not assigned.unknown	seq=cds; coord=2:81077859..81078659:-1; parent_gene=AC193423.3_FG003	1.19565	-	-	-	gi|239052651|ref|NP_001141660.2|/5.95721e-17/uncharacterized protein LOC100273785 [Zea mays]
AC193630.3_FGT003	AC193630.3		RNA.regulation of transcription.WRKY domain transcription factor family	weakly similar to ( 162) AT5G15130 | Symbols: WRKY72, ATWRKY72 | WRKY72; transcription factor | chr5:4904426-4906879 FORWARDmoderately similar to ( 227) loc_os06g05380 12006.m91873 protein OsWRKY73 - Superfamily of rice TFs having WRKY and zinc finger domains, expressed seq=cds; coord=9:19931557..19933396:-1; parent_gene=AC193630.3_FG003	1.28429	-	-	-	gi|218197565|gb|EEC79992.1|/8.39204e-63/hypothetical protein OsI_21640 [Oryza sativa Indica Group]
AC196780.4_FGT003	AC196780.4		not assigned.unknown	seq=cds; coord=3:182132070..182132336:1; parent_gene=AC196780.4_FG003	5.02171	-	-	-	gi|195643920|gb|ACG41428.1|/2.15391e-11/hypothetical protein [Zea mays]
AC197054.3_FGT002	AC197054.3		not assigned.unknown	seq=cds; coord=1:268542490..268543005:1; parent_gene=AC197054.3_FG002	1.48483	-	-	-	-
AC197764.4_FGT003	AC197764.4		RNA.regulation of transcription.C2C2(Zn) CO-like, Constans-like zinc finger family	very weakly similar to (90.5) loc_os10g25290 12010.m05478 protein pnFL-2, putative, expressed seq=cds; coord=5:36832340..36833181:1; parent_gene=AC197764.4_FG003	4.49179	-	-	-	gi|125531778|gb|EAY78343.1|/5.28113e-18/hypothetical protein OsI_33431 [Oryza sativa Indica Group]
AC198725.4_FGT009	AC198725.4		RNA.regulation of transcription.WRKY domain transcription factor family	weakly similar to ( 154) AT4G18170 | Symbols: WRKY28, ATWRKY28 | WRKY28; transcription factor | chr4:10061508-10062691 FORWARDmoderately similar to ( 346) loc_os01g43650 12001.m10627 protein OsWRKY11 - Superfamily of rice TFs having WRKY and zinc finger domains, expressed seq=cds; coord=3:217212884..217215223:-1; parent_gene=AC198725.4_FG009	1.08523	GO:0043231//intracellular membrane-bounded organelle	GO:0003677//DNA binding;GO:0001071//nucleic acid binding transcription factor activity	GO:0010468//regulation of gene expression	gi|226499378|ref|NP_001147623.1|/5.77832e-160/WRKY11 - superfamily of TFs having WRKY and zinc finger domains [Zea mays]
AC201898.4_FGT004	AC201898.4		not assigned.unknown	seq=cds; coord=1:246687276..246687643:-1; parent_gene=AC201898.4_FG004	1.48483	-	-	-	-
AC202172.3_FGT004	AC202172.3		not assigned.unknown	seq=cds; coord=1:84738849..84739076:1; parent_gene=AC202172.3_FG004	1.6802	-	-	-	gi|11387188|sp|P82659.1|DFSD2_HELAN/1.89451e-07/RecName: Full=Defensin SD2; AltName: Full=Flower-specific gamma-thionin; Flags: Precursor
AC203019.3_FGT001	AC203019.3		protein.glycosylation	very weakly similar to (83.2) AT1G74800 | Symbols: | galactosyltransferase family protein | chr1:28102221-28104993 REVERSEweakly similar to ( 106) loc_os03g48610 12003.m09869 protein transferase, transferring glycosyl groups, putative, expressed seq=cds; coord=1:262565832..262566592:-1; parent_gene=AC203019.3_FG001	3.72444	GO:0043231//intracellular membrane-bounded organelle;GO:0031224//intrinsic to membrane	GO:0030246//carbohydrate binding;GO:0016758//transferase activity, transferring hexosyl groups	GO:0006464//cellular protein modification process	gi|242033325|ref|XP_002464057.1|/1.10018e-24/hypothetical protein SORBIDRAFT_01g011450 [Sorghum bicolor]
AC203408.4_FGT003	AC203408.4		cell wall.degradation.cellulases and beta -1,4-glucanases	moderately similar to ( 380) AT2G44550 | Symbols: AtGH9B10 | AtGH9B10 (Arabidopsis thaliana glycosyl hydrolase 9B10); catalytic/ hydrolase, hydrolyzing O-glycosyl compounds | chr2:18389381-18391142 REVERSEmoderately similar to ( 492) GUN14_ORYSA Endoglucanase 14 precursor (EC 3.2.1.4) (Endo-1,4-beta glucanase 14) - Oryza sativa (Rice)moderately similar to ( 492) loc_os05g03840 12005.m04918 protei…	13.7616	-	GO:0016798//hydrolase activity, acting on glycosyl bonds	GO:0044238//primary metabolic process	gi|242089381|ref|XP_002440523.1|/2.06361e-172/hypothetical protein SORBIDRAFT_09g002490 [Sorghum bicolor]
AC203430.3_FGT007	AC203430.3		not assigned.unknown	seq=cds; coord=5:205388870..205391737:1; parent_gene=AC203430.3_FG007	1.95851	-	-	-	gi|293334611|ref|NP_001169506.1|/2.50468e-18/uncharacterized protein LOC100383380 [Zea mays]
AC203957.3_FGT004	AC203957.3		not assigned.unknown	weakly similar to ( 113) loc_os09g13570 12009.m04620 protein ocs element-binding factor 1, putative, expressed seq=cds; coord=2:174469495..174470137:-1; parent_gene=AC203957.3_FG004	2.24026	GO:0043231//intracellular membrane-bounded organelle	GO:0003677//DNA binding;GO:0001071//nucleic acid binding transcription factor activity;GO:0005515//protein binding	GO:0006351//transcription, DNA-dependent	gi|293332902|ref|NP_001167995.1|/5.11172e-68/uncharacterized protein LOC100381716 [Zea mays]
AC205122.4_FGT006	AC205122.4		not assigned.unknown	moderately similar to ( 248) loc_os01g42340 12001.m10500 protein conserved hypothetical protein seq=cds; coord=7:2144037..2146304:-1; parent_gene=AC205122.4_FG006	2.87145	-	-	-	gi|242047184|ref|XP_002461338.1|/0/hypothetical protein SORBIDRAFT_02g001180 [Sorghum bicolor]
AC206166.3_FGT002	AC206166.3		not assigned.unknown	seq=cds; coord=7:104535601..104535999:-1; parent_gene=AC206166.3_FG002	2.40028	-	-	-	gi|308082028|ref|NP_001182924.1|/2.18846e-40/uncharacterized protein LOC100501214 [Zea mays]
AC206764.4_FGT003	AC206764.4		not assigned.unknown	moderately similar to ( 252) loc_os11g05530 12011.m04750 protein expressed protein seq=cds; coord=3:654965..655642:-1; parent_gene=AC206764.4_FG003	1.97758	-	-	-	gi|226529125|ref|NP_001145001.1|/1.02579e-114/uncharacterized protein LOC100278164 [Zea mays]
AC206901.3_FGT005	AC206901.3		RNA.regulation of transcription.MYB domain transcription factor family	moderately similar to ( 230) AT3G23250 | Symbols: MYB15, ATY19, ATMYB15 | MYB15 (MYB DOMAIN PROTEIN 15); DNA binding / transcription factor | chr3:8309742-8310624 FORWARDmoderately similar to ( 237) MYB4_ORYSA Myb-related protein Myb4 (OsMyb4) (Transcription factor RLTR1) - Oryza sativa (Rice)moderately similar to ( 237) loc_os04g43680 12004.m09327 protein myb-related protein Myb4, putative, expr…	6.43069	GO:0043231//intracellular membrane-bounded organelle	GO:0003676//nucleic acid binding	GO:0010468//regulation of gene expression	gi|226529678|ref|NP_001140890.1|/4.21758e-101/uncharacterized protein LOC100272967 [Zea mays]
AC208201.3_FGT003	AC208201.3		not assigned.unknown	moderately similar to ( 472) AT3G55990 | Symbols: ESK1 | ESK1 (ESKIMO 1) | chr3:20780410-20782931 FORWARDhighly similar to ( 803) loc_os03g18140 12003.m07239 protein expressed protein seq=cds; coord=1:45337978..45340551:1; parent_gene=AC208201.3_FG003	1.95217	-	-	-	gi|242041287|ref|XP_002468038.1|/0/hypothetical protein SORBIDRAFT_01g038450 [Sorghum bicolor]
AC210013.4_FGT005	AC210013.4		hormone metabolism.cytokinin.synthesis-degradation	moderately similar to ( 255) AT3G63110 | Symbols: ATIPT3, IPT3 | ATIPT3 (ARABIDOPSIS THALIANA ISOPENTENYLTRANSFERASE 3); ATP binding / tRNA isopentenyltransferase/ transferase, transferring alkyl or aryl (other than methyl) groups | chr3:23318437-23319447 REVERSEmoderately similar to ( 358) loc_os03g59570 12003.m10854 protein cytokinin synthase, putative, expressed seq=cds; coord=5:3324513..33255…	2.07788	GO:0043231//intracellular membrane-bounded organelle	GO:0016765//transferase activity, transferring alkyl or aryl (other than methyl) groups;GO:0032559	GO:0006399//tRNA metabolic process;GO:0009690//cytokinin metabolic process	gi|189181686|ref|NP_001121194.1|/2.98367e-134/isopentenyl transferase IPT5 [Zea mays]
AC210302.3_FGT004	AC210302.3		not assigned.unknown	seq=cds; coord=1:296758537..296759223:1; parent_gene=AC210302.3_FG004	1.39405	-	-	-	-
AC211477.3_FGT021	AC211477.3		not assigned.unknown	seq=cds; coord=5:2287645..2288521:1; parent_gene=AC211477.3_FG021	1.46439	-	-	-	gi|125585709|gb|EAZ26373.1|/5.8155e-11/hypothetical protein OsJ_10256 [Oryza sativa Japonica Group]
AC212754.3_FGT004	AC212754.3		not assigned.unknown	weakly similar to ( 158) AT1G78110 | Symbols: | unknown protein | chr1:29391879-29392907 FORWARDmoderately similar to ( 273) loc_os09g20420 12009.m05249 protein expressed protein seq=cds; coord=7:100403710..100404759:-1; parent_gene=AC212754.3_FG004	2.18906	-	-	-	gi|242044540|ref|XP_002460141.1|/4.7524e-98/hypothetical protein SORBIDRAFT_02g023280 [Sorghum bicolor]
AC213621.5_FGT004	AC213621.5		cell wall.cell wall proteins.AGPs.AGP	moderately similar to ( 325) AT3G46550 | Symbols: SOS5 | SOS5 (salt overly sensitive 5); polysaccharide binding / protein binding | chr3:17136612-17137874 REVERSEhighly similar to ( 560) loc_os05g38500 12005.m08029 protein fasciclin-like arabinogalactan protein 8 precursor, putative seq=cds; coord=6:151580017..151581309:1; parent_gene=AC213621.5_FG004	2.66649	-	-	-	gi|242088179|ref|XP_002439922.1|/2.52348e-179/hypothetical protein SORBIDRAFT_09g022560 [Sorghum bicolor]
AC214517.2_FGT002	AC214517.2		not assigned.unknown	seq=cds; coord=10:15714706..15715188:1; parent_gene=AC214517.2_FG002	1.58627	-	-	-	-
AC216229.3_FGT002	AC216229.3		not assigned.unknown	seq=cds; coord=10:127982490..127983430:1; parent_gene=AC216229.3_FG002	1.0776	-	-	-	gi|242075596|ref|XP_002447734.1|/7.53948e-18/hypothetical protein SORBIDRAFT_06g014780 [Sorghum bicolor]
AC216871.3_FGT004	AC216871.3		not assigned.unknown	moderately similar to ( 266) AT3G18170 | Symbols: | transferase, transferring glycosyl groups | chr3:6228393-6229547 FORWARDmoderately similar to ( 280) loc_os02g04250 12002.m33333 protein glycosyltransferase, putative, expressed seq=cds; coord=8:10012279..10013902:-1; parent_gene=AC216871.3_FG004	2.14164	-	GO:0016740//transferase activity	-	gi|226498526|ref|NP_001142120.1|/0/uncharacterized protein LOC100274284 [Zea mays]
AC217358.3_FGT009	AC217358.3		signalling.G-proteins	moderately similar to ( 266) AT1G09630 | Symbols: ATRAB11C, ATRABA2A, ATRAB-A2A, RAB-A2A | ATRAB11C (ARABIDOPSIS RAB GTPASE 11C); GTP binding | chr1:3118350-3119571 REVERSEmoderately similar to ( 264) RB11C_LOTJA Ras-related protein Rab11C - Lotus japonicusmoderately similar to ( 315) loc_os03g62600 12003.m11137 protein ras-related protein Rab11A, putative, expressed seq=cds; coord=1:296971474..2…	1.35846	GO:0043231//intracellular membrane-bounded organelle;GO:0044444//cytoplasmic part;GO:0016020//membrane	GO:0032561//guanyl ribonucleotide binding	GO:0035556//intracellular signal transduction;GO:0006810//transport;GO:0051301//cell division	gi|242032295|ref|XP_002463542.1|/7.24177e-98/hypothetical protein SORBIDRAFT_01g001690 [Sorghum bicolor]
AC219043.3_FGT003	AC219043.3		not assigned.unknown	seq=cds; coord=3:17182314..17182724:1; parent_gene=AC219043.3_FG003	1.86416	-	-	-	gi|242052097|ref|XP_002455194.1|/9.6875e-25/hypothetical protein SORBIDRAFT_03g005970 [Sorghum bicolor]
AC225346.3_FGT001	AC225346.3		not assigned.unknown	seq=cds; coord=8:128343673..128344143:1; parent_gene=AC225346.3_FG001	2.03336	-	-	-	gi|242089497|ref|XP_002440581.1|/4.44114e-19/hypothetical protein SORBIDRAFT_09g003470 [Sorghum bicolor]
AC226227.2_FGT003	AC226227.2		cell wall.cell wall proteins.LRR	moderately similar to ( 351) AT4G06744 | Symbols: | leucine-rich repeat family protein / extensin family protein | chr4:4070870-4072084 REVERSEvery weakly similar to (95.5) PSKR_DAUCA Phytosulfokine receptor precursor (EC 2.7.11.1) (Phytosulfokine LRR receptor kinase) - Daucus carota (Carrot)highly similar to ( 600) loc_os04g42620 12004.m09229 protein protein binding protein, putative, expressed …	1.39557	GO:0031410//cytoplasmic vesicle	-	-	gi|242073644|ref|XP_002446758.1|/0/hypothetical protein SORBIDRAFT_06g021870 [Sorghum bicolor]
AC231411.1_FGT011	AC231411.1		lipid metabolism.lipid degradation.lipases.triacylglycerol lipase	moderately similar to ( 368) AT4G18550 | Symbols: | lipase class 3 family protein | chr4:10225006-10226862 REVERSEhighly similar to ( 525) loc_os05g49830 12005.m09053 protein triacylglycerol lipase, putative, expressed seq=cds; coord=6:165625344..165626546:1; parent_gene=AC231411.1_FG011	4.45818	GO:0043231//intracellular membrane-bounded organelle	GO:0004091//carboxylesterase activity	GO:0044238//primary metabolic process	gi|226510224|ref|NP_001149813.1|/0/triacylglycerol lipase [Zea mays]
AC233899.1_FGT002	AC233899.1		RNA.regulation of transcription.bHLH,Basic Helix-Loop-Helix family	weakly similar to ( 113) AT5G65320 | Symbols: | basic helix-loop-helix (bHLH) family protein | chr5:26107368-26108640 REVERSEmoderately similar to ( 253) loc_os03g08930 12003.m35054 protein helix-loop-helix-like protein, putative, expressed seq=cds; coord=9:149664143..149665651:-1; parent_gene=AC233899.1_FG002	2.14014	GO:0043231//intracellular membrane-bounded organelle	-	-	gi|226494678|ref|NP_001141780.1|/1.05684e-108/uncharacterized protein LOC100273916 [Zea mays]
AC234157.1_FGT003	AC234157.1		not assigned.unknown	very weakly similar to (91.7) loc_os03g55880 12003.m10500 protein expressed protein seq=cds; coord=1:281065185..281065733:1; parent_gene=AC234157.1_FG003	6.62898	-	-	-	gi|226506386|ref|NP_001142797.1|/1.47862e-42/uncharacterized protein LOC100275173 [Zea mays]
AC234202.1_FGT004	AC234202.1		not assigned.unknown	moderately similar to ( 253) loc_os05g02720 12005.m04808 protein hypothetical protein seq=cds; coord=10:145539655..145543217:-1; parent_gene=AC234202.1_FG004	1.03165	-	-	-	gi|242042207|ref|XP_002468498.1|/5.61024e-68/hypothetical protein SORBIDRAFT_01g046970 [Sorghum bicolor]
EF517601.1_FGT006	EF517601.1		not assigned.unknown	weakly similar to ( 114) loc_os01g14710 12001.m08074 protein conserved hypothetical protein seq=cds; coord=3:34417794..34418619:1; parent_gene=EF517601.1_FG006	1.01884	-	-	-	gi|242052447|ref|XP_002455369.1|/3.91375e-41/hypothetical protein SORBIDRAFT_03g009450 [Sorghum bicolor]
GRMZM2G000520_T01	GRMZM2G000520		RNA.regulation of transcription.AP2/EREBP, APETALA2/Ethylene-responsive element binding protein family	very weakly similar to (85.9) AT5G52020 | Symbols: | AP2 domain-containing protein | chr5:21124192-21124890 REVERSEweakly similar to ( 110) loc_os02g45420 12002.m09579 protein ap2/EREBP transcription factor, putative, expressed seq=cds; coord=4:155610450..155611907:1; parent_gene=GRMZM2G000520	1.44511	GO:0043231//intracellular membrane-bounded organelle	-	GO:0010468//regulation of gene expression;GO:0006952//defense response;GO:0006350	gi|218195400|gb|EEC77827.1|/2.06874e-31/hypothetical protein OsI_17041 [Oryza sativa Indica Group]
GRMZM2G000603_T01	GRMZM2G000603		protein.postranslational modification	weakly similar to ( 198) AT2G30020 | Symbols: | protein phosphatase 2C, putative / PP2C, putative | chr2:12814437-12815904 FORWARDmoderately similar to ( 375) loc_os12g09640 12012.m04948 protein protein phosphatase 2C containing protein, expressed seq=cds; coord=6:16792554..16799019:1; parent_gene=GRMZM2G000603	2.66514	GO:0044464//cell part	GO:0016787//hydrolase activity	-	gi|242085176|ref|XP_002443013.1|/2.12543e-144/hypothetical protein SORBIDRAFT_08g006310 [Sorghum bicolor]
GRMZM2G000665_T01	GRMZM2G000665		protein.targeting.unknown	moderately similar to ( 409) AT3G59310 | Symbols: | unknown protein | chr3:21922316-21924313 REVERSEhighly similar to ( 546) loc_os08g42720 12008.m26773 protein solute carrier family 35, member F1, putative, expressed seq=cds; coord=2:193163860..193185123:-1; parent_gene=GRMZM2G000665	1.38021	GO:0043231//intracellular membrane-bounded organelle	-	-	gi|194701564|gb|ACF84866.1|/0/unknown [Zea mays]
GRMZM2G001332_T02	GRMZM2G001332		not assigned.unknown	seq=cds; coord=6:157323746..157324439:-1; parent_gene=GRMZM2G001332	1.93199	-	-	-	gi|226501264|ref|NP_001143375.1|/2.44322e-10/uncharacterized protein LOC100276009 [Zea mays]
GRMZM2G001451_T01	GRMZM2G001451		not assigned.unknown	weakly similar to ( 192) loc_os01g18220 12001.m08364 protein expressed protein seq=cds; coord=3:48299924..48302886:1; parent_gene=GRMZM2G001451	1.02361	-	-	-	gi|226529919|ref|NP_001142055.1|/3.24639e-96/uncharacterized protein LOC100274211 [Zea mays]
GRMZM2G002104_T01	GRMZM2G002104		not assigned.unknown	moderately similar to ( 265) AT3G50340 | Symbols: | unknown protein | chr3:18665333-18666544 REVERSEmoderately similar to ( 450) loc_os09g28340 12009.m05985 protein expressed protein seq=cds; coord=2:186174995..186176491:-1; parent_gene=GRMZM2G002104	35.6983	-	-	-	gi|242049488|ref|XP_002462488.1|/1.25896e-140/hypothetical protein SORBIDRAFT_02g026580 [Sorghum bicolor]
GRMZM2G002704_T01	GRMZM2G002704		misc.oxidases - copper, flavone etc.	moderately similar to ( 395) AT2G36690 | Symbols: | oxidoreductase, 2OG-Fe(II) oxygenase family protein | chr2:15379930-15381987 FORWARDweakly similar to ( 172) DV4H_CATRO Desacetoxyvindoline 4-hydroxylase (EC 1.14.11.20) - Catharanthus roseus (Rosy periwinkle) (Madagascar periwinkle)highly similar to ( 501) loc_os08g44590 12008.m08432 protein gibberellin 20 oxidase 2, putative, expressed seq=cds…	1.06808	-	GO:0003824//catalytic activity;GO:0046914//transition metal ion binding	GO:0008152//metabolic process	gi|226533520|ref|NP_001149522.1|/0/gibberellin 20 oxidase 2 [Zea mays]
GRMZM2G003489_T01	GRMZM2G003489		not assigned.unknown	seq=cds; coord=1:275471687..275472064:-1; parent_gene=GRMZM2G003489	1.01345	-	-	-	-
GRMZM2G003970_T02	GRMZM2G003970		not assigned.unknown	weakly similar to ( 126) loc_os11g30760 12011.m61771 protein expressed protein seq=cds; coord=4:21221045..21222058:1; parent_gene=GRMZM2G003970	1.48483	GO:0031410//cytoplasmic vesicle	GO:0016758//transferase activity, transferring hexosyl groups	GO:0006464//cellular protein modification process	gi|194695898|gb|ACF82033.1|/1.4656e-41/unknown [Zea mays]
GRMZM2G004207_T02	GRMZM2G004207		protein.postranslational modification.kinase.receptor like cytoplasmatic kinase VII	moderately similar to ( 338) AT2G05940 | Symbols: | protein kinase, putative | chr2:2287514-2289270 REVERSEweakly similar to ( 161) PSKR_DAUCA Phytosulfokine receptor precursor (EC 2.7.11.1) (Phytosulfokine LRR receptor kinase) - Daucus carota (Carrot)moderately similar to ( 423) loc_os09g27010 12009.m05853 protein protein kinase APK1B, chloroplast precursor, putative, expressed seq=cds; coord=7:…	4.42762	GO:0043231//intracellular membrane-bounded organelle	GO:0004672//protein kinase activity;GO:0032559	GO:0006464//cellular protein modification process	gi|242049426|ref|XP_002462457.1|/1.26599e-129/hypothetical protein SORBIDRAFT_02g025910 [Sorghum bicolor]
GRMZM2G005643_T01	GRMZM2G005643		cell wall.modification	weakly similar to ( 117) loc_os04g25150 12004.m07645 protein pollen allergen Phl p 2 precursor, putative, expressed seq=cds; coord=6:157368796..157369949:1; parent_gene=GRMZM2G005643	1.32785	GO:0031410//cytoplasmic vesicle	-	GO:0000003//reproduction	gi|219363631|ref|NP_001136739.1|/1.94718e-63/uncharacterized protein LOC100216880 precursor [Zea mays]
GRMZM2G006416_T06	GRMZM2G006416		not assigned.unknown	seq=cds; coord=7:145764674..145765525:1; parent_gene=GRMZM2G006416	1.12408	GO:0043234//protein complex	GO:0004721//phosphoprotein phosphatase activity;GO:0043169//cation binding	GO:0006464//cellular protein modification process	gi|195606362|gb|ACG25011.1|/4.3883e-37/hypothetical protein [Zea mays]
GRMZM2G006470_T01	GRMZM2G006470		not assigned.unknown	weakly similar to ( 111) loc_os01g09010 12001.m07526 protein 3-N-debenzoyl-2-deoxytaxol N-benzoyltransferase, putative, expressed seq=cds; coord=10:13021955..13024651:1; parent_gene=GRMZM2G006470	4.5265	GO:0044464//cell part	GO:0016746//transferase activity, transferring acyl groups	-	gi|223975947|gb|ACN32161.1|/2.52563e-31/unknown [Zea mays]
GRMZM2G007053_T01	GRMZM2G007053		secondary metabolism.flavonoids.dihydroflavonols	weakly similar to ( 113) AT1G61720 | Symbols: BAN | BAN (BANYULS); oxidoreductase | chr1:22791326-22792757 REVERSEvery weakly similar to (98.2) DFRA_MAIZE Dihydroflavonol-4-reductase (EC 1.1.1.219) (DFR) (Dihydrokaempferol 4-reductase) - Zea mays (Maize)weakly similar to ( 191) loc_os04g53850 12004.m35472 protein leucoanthocyanidin reductase, putative, expressed seq=cds; coord=3:170426095..170427…	1.1059	-	GO:0048037//cofactor binding	GO:0008152//metabolic process	gi|226492932|ref|NP_001148881.1|/4.17636e-83/leucoanthocyanidin reductase [Zea mays]
GRMZM2G007969_T01	GRMZM2G007969		not assigned.unknown	seq=cds; coord=1:199902255..199902953:1; parent_gene=GRMZM2G007969	3.01426	-	-	-	gi|226502286|ref|NP_001144948.1|/3.22592e-34/uncharacterized protein LOC100278083 precursor [Zea mays]
GRMZM2G008286_T01	GRMZM2G008286		RNA.regulation of transcription.HB,Homeobox transcription factor family	very weakly similar to (80.9) loc_os02g05640 12002.m05912 protein homeobox-leucine zipper protein ATHB-4, putative seq=cds; coord=8:80679855..80680519:-1; parent_gene=GRMZM2G008286	1.68389	GO:0043231//intracellular membrane-bounded organelle	GO:0003677//DNA binding;GO:0001071//nucleic acid binding transcription factor activity	GO:0010468//regulation of gene expression;GO:0009725//response to hormone stimulus;GO:0006351//transcription, DNA-dependent	gi|226493558|ref|NP_001142920.1|/1.43773e-53/uncharacterized protein LOC100275353 [Zea mays]
GRMZM2G008558_T01	GRMZM2G008558		not assigned.unknown	moderately similar to ( 218) loc_os06g10710 12006.m05789 protein hypothetical protein seq=cds; coord=6:109600152..109614629:-1; parent_gene=GRMZM2G008558	1.15648	GO:0043231//intracellular membrane-bounded organelle	-	-	gi|242092372|ref|XP_002436676.1|/1.46703e-89/hypothetical protein SORBIDRAFT_10g006920 [Sorghum bicolor]
GRMZM2G008819_T01	GRMZM2G008819		misc.plastocyanin-like	weakly similar to ( 112) AT1G72230 | Symbols: | plastocyanin-like domain-containing protein | chr1:27188287-27189093 FORWARDweakly similar to ( 127) BCP_PEA Blue copper protein precursor - Pisum sativum (Garden pea)weakly similar to ( 174) loc_os02g52180 12002.m10249 protein uclacyanin-2 precursor, putative, expressed seq=cds; coord=4:179792808..179793882:-1; parent_gene=GRMZM2G008819	1.22653	GO:0031410//cytoplasmic vesicle	GO:0046914//transition metal ion binding	-	gi|293333579|ref|NP_001168456.1|/6.43038e-64/uncharacterized protein LOC100382230 precursor [Zea mays]
GRMZM2G009465_T01	GRMZM2G009465		cell wall.cell wall proteins.proline rich proteins	weakly similar to ( 192) loc_os10g05980 12010.m03998 protein proline-rich protein, putative, expressed seq=cds; coord=1:120192918..120195211:1; parent_gene=GRMZM2G009465	14.4239	GO:0031410//cytoplasmic vesicle	-	-	gi|162461641|ref|NP_001105118.1|/5.69948e-116/LOC542000 precursor [Zea mays]
GRMZM2G010048_T01	GRMZM2G010048		stress.biotic	weakly similar to ( 162) AT4G11650 | Symbols: ATOSM34 | ATOSM34 (osmotin 34) | chr4:7025127-7026113 REVERSEweakly similar to ( 188) P21_SOYBN Protein P21 - Glycine max (Soybean)moderately similar to ( 236) loc_os03g46060 12003.m09626 protein osmotin-like protein OSML13 precursor, putative, expressed seq=cds; coord=5:14814824..14815810:1; parent_gene=GRMZM2G010048	2.83467	GO:0031410//cytoplasmic vesicle	-	-	gi|242038629|ref|XP_002466709.1|/8.45286e-96/hypothetical protein SORBIDRAFT_01g012700 [Sorghum bicolor]
GRMZM2G010657_T02	GRMZM2G010657		not assigned.unknown	seq=cds; coord=1:53822733..53823697:1; parent_gene=GRMZM2G010657	1.52885	-	-	-	gi|195627444|gb|ACG35552.1|/8.13098e-34/hypothetical protein [Zea mays]
GRMZM2G011667_T01	GRMZM2G011667		not assigned.unknown	seq=cds; coord=1:66794366..66799263:-1; parent_gene=GRMZM2G011667	1.3418	-	-	-	gi|226494777|ref|NP_001146085.1|/0/uncharacterized protein LOC100279617 [Zea mays]
GRMZM2G012636_T01	GRMZM2G012636		hormone metabolism.auxin.induced-regulated-responsive-activated	weakly similar to ( 145) loc_os09g37470 12009.m06694 protein OsSAUR52 - Auxin-responsive SAUR gene family member, expressed seq=cds; coord=7:147383997..147384822:-1; parent_gene=GRMZM2G012636	7.18864	GO:0043231//intracellular membrane-bounded organelle	GO:0005515//protein binding	GO:0009755//hormone-mediated signaling pathway	gi|226531724|ref|NP_001148334.1|/1.10138e-61/SAUR55 - auxin-responsive SAUR family member [Zea mays]
GRMZM2G012861_T01	GRMZM2G012861		signalling.receptor kinases.leucine rich repeat III	weakly similar to ( 120) AT5G24100 | Symbols: | leucine-rich repeat transmembrane protein kinase, putative | chr5:8149216-8151191 FORWARDweakly similar to ( 177) loc_os01g12390 12001.m07854 protein ATP binding protein, putative, expressed seq=cds; coord=3:2763289..2765842:1; parent_gene=GRMZM2G012861	1.01926	GO:0044464//cell part	GO:0000166//nucleotide binding	-	gi|7573610|dbj|BAA94519.1|/2.88621e-103/putative receptor-like kinase [Oryza sativa Japonica Group]
GRMZM2G012874_T01	GRMZM2G012874		protein.glycosylation	moderately similar to ( 235) AT2G37090 | Symbols: IRX9 | IRX9 (IRREGULAR XYLEM 9); transferase, transferring glycosyl groups / xylosyltransferase | chr2:15587671-15589223 REVERSEmoderately similar to ( 475) loc_os05g03174 12005.m04851 protein glycosyltransferase, putative, expressed seq=cds; coord=8:131688249..131694614:-1; parent_gene=GRMZM2G012874	2.02033	GO:0043231//intracellular membrane-bounded organelle	GO:0015020//glucuronosyltransferase activity	-	gi|226528306|ref|NP_001140833.1|/5.04061e-172/uncharacterized protein LOC100272909 [Zea mays]
GRMZM2G013191_T01	GRMZM2G013191		not assigned.unknown	very weakly similar to (91.7) loc_os11g05810 12011.m04777 protein expressed protein seq=cds; coord=4:190406189..190406897:-1; parent_gene=GRMZM2G013191	5.67333	-	-	-	gi|242070069|ref|XP_002450311.1|/7.91872e-20/hypothetical protein SORBIDRAFT_05g003560 [Sorghum bicolor]
GRMZM2G013790_T04	GRMZM2G013790		signalling.receptor kinases.wheat LRK10 like	moderately similar to ( 425) AT1G18390 | Symbols: | ATP binding / kinase/ protein kinase/ protein serine/threonine kinase/ protein tyrosine kinase | chr1:6327463-6329935 FORWARDmoderately similar to ( 224) CRI4_MAIZE Putative receptor protein kinase CRINKLY4 precursor (EC 2.7.11.1) - Zea mays (Maize)highly similar to ( 861) loc_os01g04409 12001.m07075 protein OsWAK1 - OsWAK receptor-like cytoplas…	1.76576	-	GO:0004672//protein kinase activity;GO:0032559	GO:0006464//cellular protein modification process	gi|115434398|ref|NP_001041957.1|/0/Os01g0136400 [Oryza sativa Japonica Group]
GRMZM2G013842_T01	GRMZM2G013842		not assigned.unknown	seq=cds; coord=1:177553026..177554285:-1; parent_gene=GRMZM2G013842	1.97623	-	-	-	gi|293332359|ref|NP_001170230.1|/5.79284e-64/uncharacterized protein LOC100384183 [Zea mays]
GRMZM2G013884_T01	GRMZM2G013884		signalling.receptor kinases.wheat LRK10 like	moderately similar to ( 333) loc_os01g04440 12001.m07079 protein conserved hypothetical protein seq=cds; coord=3:20377265..20378484:1; parent_gene=GRMZM2G013884	3.45405	-	-	-	gi|293334155|ref|NP_001170077.1|/1.87128e-136/uncharacterized protein LOC100383994 precursor [Zea mays]
GRMZM2G014534_T01	GRMZM2G014534		RNA.regulation of transcription.MYB domain transcription factor family	very weakly similar to (90.5) AT3G02940 | Symbols: MYB107, AtMYB107 | MYB107 (myb domain protein 107); DNA binding / transcription factor | chr3:662141-663830 FORWARDvery weakly similar to (84.7) MYB4_ORYSA Myb-related protein Myb4 (OsMyb4) (Transcription factor RLTR1) - Oryza sativa (Rice)weakly similar to ( 124) loc_os04g50680 12004.m09965 protein transcription factor MYB2, putative, expressed …	1.40324	GO:0043231//intracellular membrane-bounded organelle	GO:0003676//nucleic acid binding;GO:0001071//nucleic acid binding transcription factor activity	GO:0010468//regulation of gene expression;GO:0006351//transcription, DNA-dependent;GO:0010033//response to organic substance	gi|19548469|gb|AAL90658.1|AF470090_1/5.44539e-29/P-type R2R3 Myb protein [Zea mays]
GRMZM2G014594_T01	GRMZM2G014594		not assigned.unknown	seq=cds; coord=3:201240704..201241779:-1; parent_gene=GRMZM2G014594	1.00153	-	-	-	gi|226533034|ref|NP_001147501.1|/3.04005e-07/eukaryotic translation initiation factor 3 subunit 2 [Zea mays]
GRMZM2G015021_T01	GRMZM2G015021		RNA.regulation of transcription.MYB domain transcription factor family	moderately similar to ( 241) AT5G57620 | Symbols: MYB36, AtMYB36 | MYB36 (myb domain protein 36); DNA binding / transcription factor | chr5:23334904-23336388 FORWARDweakly similar to ( 169) MYB4_ORYSA Myb-related protein Myb4 (OsMyb4) (Transcription factor RLTR1) - Oryza sativa (Rice)moderately similar to ( 350) loc_os02g54520 12002.m10481 protein myb-like DNA-binding domain containing protein, e…	1.82174	GO:0043231//intracellular membrane-bounded organelle	GO:0003676//nucleic acid binding	GO:0010468//regulation of gene expression	gi|115449109|ref|NP_001048334.1|/3.50247e-95/Os02g0786300 [Oryza sativa Japonica Group]
GRMZM2G017022_T01	GRMZM2G017022		signalling.receptor kinases.DUF 26	moderately similar to ( 321) AT5G45800 | Symbols: MEE62 | MEE62 (maternal effect embryo arrest 62); ATP binding / protein binding / protein kinase/ protein serine/threonine kinase/ protein tyrosine kinase | chr5:18575765-18578972 REVERSEweakly similar to ( 118) PSKR_DAUCA Phytosulfokine receptor precursor (EC 2.7.11.1) (Phytosulfokine LRR receptor kinase) - Daucus carota (Carrot)highly similar to…	2.13472	GO:0031410//cytoplasmic vesicle	GO:0005488//binding	-	gi|242064610|ref|XP_002453594.1|/0/hypothetical protein SORBIDRAFT_04g008660 [Sorghum bicolor]
GRMZM2G017616_T01	GRMZM2G017616		hormone metabolism.jasmonate.synthesis-degradation.lipoxygenase	nearly identical (1140) AT1G72520 | Symbols: | lipoxygenase, putative | chr1:27308611-27312589 FORWARDnearly identical (1561) LOX6_ORYSA Probable lipoxygenase 6 (EC 1.13.11.12) - Oryza sativa (Rice)nearly identical (1561) loc_os03g08220 12003.m06331 protein lipoxygenase 6, putative, expressed seq=cds; coord=1:16575053..16581541:1; parent_gene=GRMZM2G017616	1.44111	GO:0043231//intracellular membrane-bounded organelle	GO:0046914//transition metal ion binding;GO:0016702//oxidoreductase activity, acting on single donors with incorporation of molecular oxygen, incorporation of two atoms of oxygen	GO:0006633//fatty acid biosynthetic process	gi|162463530|ref|NP_001105977.1|/0/lipoxygenase9 [Zea mays]
GRMZM2G018099_T01	GRMZM2G018099		not assigned.unknown	seq=cds; coord=10:93439404..93439793:1; parent_gene=GRMZM2G018099	1.4734	-	-	-	gi|226530409|ref|NP_001143281.1|/2.05865e-46/uncharacterized protein LOC100275815 precursor [Zea mays]
GRMZM2G018353_T01	GRMZM2G018353		transport.peptides and oligopeptides	very weakly similar to (96.7) AT1G27040 | Symbols: | nitrate transporter, putative | chr1:9386893-9390018 REVERSEmoderately similar to ( 260) loc_os04g41410 12004.m09120 protein peptide transporter PTR2, putative, expressed seq=cds; coord=10:127255916..127257380:1; parent_gene=GRMZM2G018353	2.17839	-	-	-	gi|242076326|ref|XP_002448099.1|/6.53391e-105/hypothetical protein SORBIDRAFT_06g021050 [Sorghum bicolor]
GRMZM2G018673_T01	GRMZM2G018673		not assigned.unknown	seq=cds; coord=4:225711895..225713017:-1; parent_gene=GRMZM2G018673	6.41644	-	-	-	gi|226496878|ref|NP_001144480.1|/1.20008e-65/uncharacterized protein LOC100277448 [Zea mays]
GRMZM2G019280_T01	GRMZM2G019280		not assigned.unknown	seq=cds; coord=1:151078538..151079102:-1; parent_gene=GRMZM2G019280	2.37941	-	-	-	-
GRMZM2G021310_T01	GRMZM2G021310		misc.cytochrome P450	moderately similar to ( 500) AT3G14680 | Symbols: CYP72A14 | CYP72A14; electron carrier/ heme binding / iron ion binding / monooxygenase/ oxygen binding | chr3:4934478-4936462 FORWARDmoderately similar to ( 444) C72A1_CATRO Cytochrome P450 72A1 (EC 1.3.3.9) (CYPLXXII) (Secologanin synthase) (SLS) - Catharanthus roseus (Rosy periwinkle) (Madagascar periwinkle)highly similar to ( 764) loc_os01g4377…	1.0659	-	GO:0016491//oxidoreductase activity;GO:0005506//iron ion binding	GO:0006091//generation of precursor metabolites and energy	gi|242053703|ref|XP_002455997.1|/0/hypothetical protein SORBIDRAFT_03g028680 [Sorghum bicolor]
GRMZM2G022699_T01	GRMZM2G022699		not assigned.unknown	very weakly similar to (88.6) loc_os04g39320 12004.m35335 protein expressed protein seq=cds; coord=2:40011583..40012748:1; parent_gene=GRMZM2G022699	2.99561	-	-	-	gi|242076120|ref|XP_002447996.1|/6.01126e-27/hypothetical protein SORBIDRAFT_06g019470 [Sorghum bicolor]
GRMZM2G022711_T05	GRMZM2G022711		not assigned.unknown	seq=cds; coord=8:4512238..4512731:1; parent_gene=GRMZM2G022711	1.55095	-	-	-	-
GRMZM2G023575_T01	GRMZM2G023575		not assigned.unknown	moderately similar to ( 223) AT3G53120 | Symbols: VPS37-1 | VPS37-1 | chr3:19690729-19692490 REVERSEmoderately similar to ( 333) loc_os03g08770 12003.m06384 protein vacuolar protein sorting 37C, putative, expressed seq=cds; coord=1:18128750..18134684:1; parent_gene=GRMZM2G023575	1.33712	-	-	-	gi|226531910|ref|NP_001151044.1|/1.50739e-100/LOC100284677 [Zea mays]
GRMZM2G023794_T02	GRMZM2G023794		secondary metabolism.phenylpropanoids.lignin biosynthesis.PAL	moderately similar to ( 381) AT2G37040 | Symbols: pal1, ATPAL1 | pal1 (Phe ammonia lyase 1); phenylalanine ammonia-lyase | chr2:15557602-15560237 REVERSEmoderately similar to ( 486) PAL2_ORYSA Phenylalanine ammonia-lyase (EC 4.3.1.5) - Oryza sativa (Rice)moderately similar to ( 487) loc_os02g41670 12002.m09203 protein phenylalanine ammonia-lyase, putative, expressed seq=cds; coord=1:264665..27089…	10.4478	GO:0044424//intracellular part	GO:0016841//ammonia-lyase activity	GO:0006575//cellular modified amino acid metabolic process;GO:0006558//L-phenylalanine metabolic process	gi|293332887|ref|NP_001168086.1|/3.3409e-139/uncharacterized protein LOC100381820 [Zea mays]
GRMZM2G026143_T01	GRMZM2G026143		not assigned.unknown	seq=cds; coord=9:88242515..88243287:-1; parent_gene=GRMZM2G026143	2.9268	-	-	-	gi|195610054|gb|ACG26857.1|/1.78671e-15/hypothetical protein [Zea mays]
GRMZM2G026171_T01	GRMZM2G026171		not assigned.unknown	seq=cds; coord=5:12533621..12535195:-1; parent_gene=GRMZM2G026171	1.09453	-	-	-	gi|242038453|ref|XP_002466621.1|/9.52574e-38/hypothetical protein SORBIDRAFT_01g011180 [Sorghum bicolor]
GRMZM2G027522_T01	GRMZM2G027522		not assigned.unknown	weakly similar to ( 120) AT1G32583 | Symbols: | FUNCTIONS IN: molecular_function unknown; INVOLVED IN: biological_process unknown; LOCATED IN: endomembrane system; BEST Arabidopsis thaliana protein match is: TPD1 (TAPETUM DETERMINANT 1) (TAIR:AT4G24972.1); Has 78 Blast hits to 76 proteins in 9 species: Archae - 0; Bacteria - 0; Metazoa - 0; Fungi - 0; Plants - 78; Viruses - 0; Other Eukaryotes - …	1.19964	-	GO:0005488//binding	GO:0045165//cell fate commitment;GO:0003006//developmental process involved in reproduction	gi|363543283|ref|NP_001241857.1|/1.33797e-75/MAC1 protein precursor [Zea mays]
GRMZM2G027976_T01	GRMZM2G027976		RNA.regulation of transcription.bZIP transcription factor family	weakly similar to ( 173) AT3G58120 | Symbols: ATBZIP61, BZIP61 | BZIP61; DNA binding / transcription activator/ transcription factor | chr3:21521289-21523078 REVERSEvery weakly similar to (92.0) RF2B_ORYSA Transcription factor RF2b - Oryza sativa (Rice)moderately similar to ( 226) loc_os01g55150 12001.m11675 protein transcription factor RF2b, putative, expressed seq=cds; coord=3:196153277..196156…	9.39946	GO:0043231//intracellular membrane-bounded organelle	GO:0003677//DNA binding;GO:0001071//nucleic acid binding transcription factor activity;GO:0005515//protein binding	GO:0006351//transcription, DNA-dependent	gi|226510295|ref|NP_001140593.1|/9.45915e-100/uncharacterized protein LOC100272663 [Zea mays]
GRMZM2G028037_T01	GRMZM2G028037		protein.postranslational modification.kinase.receptor like cytoplasmatic kinase VII	highly similar to ( 618) AT5G15080 | Symbols: | protein kinase, putative | chr5:4886414-4888555 FORWARDmoderately similar to ( 223) NORK_PEA Nodulation receptor kinase precursor (EC 2.7.11.1) - Pisum sativum (Garden pea)highly similar to ( 774) loc_os01g40590 12001.m10330 protein protein kinase APK1A, chloroplast precursor, putative, expressed seq=cds; coord=3:221435470..221440819:-1; parent_gene…	1.41818	-	GO:0004702//receptor signaling protein serine/threonine kinase activity;GO:0032559	GO:0006464//cellular protein modification process	gi|224033621|gb|ACN35886.1|/0/unknown [Zea mays]
GRMZM2G028104_T01	GRMZM2G028104		not assigned.unknown	moderately similar to ( 264) AT3G62160 | Symbols: | transferase family protein | chr3:23014333-23015808 REVERSEvery weakly similar to (87.8) HCBT3_DIACA Anthranilate N-benzoyltransferase protein 3 (EC 2.3.1.144) (Anthranilate N-hydroxycinnamoyl/benzoyltransferase 3) - Dianthus caryophyllus (Carnation) (Clove pink)highly similar to ( 568) loc_os05g04584 12005.m04991 protein 3-N-debenzoyl-2-deoxyta…	2.31535	-	GO:0016746//transferase activity, transferring acyl groups	-	gi|194707276|gb|ACF87722.1|/0/unknown [Zea mays]
GRMZM2G028543_T01	GRMZM2G028543		protein.degradation.ubiquitin.E3.RING	very weakly similar to (89.4) EL5_ORYSA E3 ubiquitin-protein ligase EL5 (EC 6.3.2.-) - Oryza sativa (Rice)very weakly similar to (89.4) loc_os02g35429 12002.m08631 protein zinc finger, C3HC4 type family protein seq=cds; coord=2:46750628..46751970:-1; parent_gene=GRMZM2G028543	1.14098	-	-	-	gi|226503579|ref|NP_001141538.1|/8.22226e-80/uncharacterized protein LOC100273652 [Zea mays]
GRMZM2G028969_T01	GRMZM2G028969		RNA.regulation of transcription.AP2/EREBP, APETALA2/Ethylene-responsive element binding protein family	weakly similar to ( 103) AT5G11590 | Symbols: TINY2 | TINY2 (TINY2); DNA binding / transcription factor | chr5:3727789-3728499 REVERSEweakly similar to ( 183) loc_os04g46410 12004.m09590 protein dehydration-responsive element-binding protein 1B, putative, expressed seq=cds; coord=2:20096078..20097002:-1; parent_gene=GRMZM2G028969	2.07073	GO:0043231//intracellular membrane-bounded organelle	GO:0003676//nucleic acid binding;GO:0001071//nucleic acid binding transcription factor activity	GO:0010468//regulation of gene expression;GO:0006351//transcription, DNA-dependent	gi|242073926|ref|XP_002446899.1|/1.49815e-65/hypothetical protein SORBIDRAFT_06g024540 [Sorghum bicolor]
GRMZM2G029282_T01	GRMZM2G029282		RNA.regulation of transcription.WRKY domain transcription factor family	weakly similar to ( 190) loc_os01g60540 12001.m12182 protein OsWRKY20 - Superfamily of rice TFs having WRKY and zinc finger domains seq=cds; coord=8:170352645..170355460:-1; parent_gene=GRMZM2G029282	2.54035	GO:0043231//intracellular membrane-bounded organelle	-	-	gi|242054805|ref|XP_002456548.1|/8.1421e-99/hypothetical protein SORBIDRAFT_03g038190 [Sorghum bicolor]
GRMZM2G029407_T01	GRMZM2G029407		signalling.receptor kinases.leucine rich repeat III	moderately similar to ( 342) AT4G31250 | Symbols: | leucine-rich repeat transmembrane protein kinase, putative | chr4:15179201-15181751 REVERSEweakly similar to ( 140) PSKR_DAUCA Phytosulfokine receptor precursor (EC 2.7.11.1) (Phytosulfokine LRR receptor kinase) - Daucus carota (Carrot)highly similar to ( 506) loc_os02g07810 12002.m06127 protein ATP binding protein, putative, expressed seq=cds; …	6.7336	GO:0031224//intrinsic to membrane	GO:0016301//kinase activity;GO:0032559	GO:0006464//cellular protein modification process	gi|293332093|ref|NP_001169728.1|/0/uncharacterized protein LOC100383609 precursor [Zea mays]
GRMZM2G030036_T01	GRMZM2G030036		metal handling.binding, chelation and storage	moderately similar to ( 301) AT1G56430 | Symbols: ATNAS4, NAS4 | NAS4 (NICOTIANAMINE SYNTHASE 4); nicotianamine synthase | chr1:21137023-21137997 FORWARDmoderately similar to ( 479) NAS2_ORYSA Nicotianamine synthase 2 (EC 2.5.1.43) (S-adenosyl-L-methionine:S-adenosyl-L-methionine:S-adenosyl-methionine 3-amino-3-carboxypropyltransferase 2) (OsNAS2) - Oryza sativa (Rice)moderately similar to ( 485)…	1.17175	-	GO:0016765//transferase activity, transferring alkyl or aryl (other than methyl) groups	GO:0018130;GO:0000041//transition metal ion transport	gi|162460235|ref|NP_001104862.1|/0/nicotianamine synthase2 [Zea mays]
GRMZM2G030567_T01	GRMZM2G030567		not assigned.unknown	weakly similar to ( 159) loc_os03g02660 12003.m05806 protein expressed protein seq=cds; coord=1:3737629..3742474:1; parent_gene=GRMZM2G030567	1.23721	-	-	-	gi|242042481|ref|XP_002468635.1|/4.79543e-91/hypothetical protein SORBIDRAFT_01g049390 [Sorghum bicolor]
GRMZM2G031261_T02	GRMZM2G031261		not assigned.unknown	seq=cds; coord=10:4749444..4750213:-1; parent_gene=GRMZM2G031261	1.4084	-	-	-	gi|308080458|ref|NP_001183858.1|/1.85748e-23/uncharacterized protein LOC100502451 precursor [Zea mays]
GRMZM2G031323_T01	GRMZM2G031323		RNA.regulation of transcription.MYB domain transcription factor family	moderately similar to ( 266) AT4G21440 | Symbols: ATMYB102, ATM4 | ATMYB102 (ARABIDOPSIS MYB-LIKE 102); DNA binding / transcription factor | chr4:11418425-11419652 REVERSEmoderately similar to ( 215) MYB38_MAIZE Myb-related protein Zm38 - Zea mays (Maize)moderately similar to ( 355) loc_os07g37210 12007.m07971 protein MYB transcription factor, putative, expressed seq=cds; coord=7:157167150..15716…	1.22196	GO:0043231//intracellular membrane-bounded organelle	GO:0003676//nucleic acid binding;GO:0001071//nucleic acid binding transcription factor activity	GO:0010468//regulation of gene expression;GO:0009725//response to hormone stimulus;GO:0006970//response to osmotic stress	gi|242050542|ref|XP_002463015.1|/5.67392e-112/hypothetical protein SORBIDRAFT_02g036250 [Sorghum bicolor]
GRMZM2G031981_T01	GRMZM2G031981		protein.folding	weakly similar to ( 112) AT3G17668 | Symbols: ENA | ENA (ENHANCER OF ATNSI ACTIVITY); heat shock protein binding / unfolded protein binding | chr3:6039640-6040324 FORWARDweakly similar to ( 174) loc_os04g49940 12004.m35100 protein expressed protein seq=cds; coord=2:13831519..13853739:1; parent_gene=GRMZM2G031981	1.48339	GO:0043231//intracellular membrane-bounded organelle	GO:0005515//protein binding	GO:0044267//cellular protein metabolic process	gi|226495159|ref|NP_001143602.1|/2.09129e-58/uncharacterized protein LOC100276310 [Zea mays]
GRMZM2G032337_T01	GRMZM2G032337		protein.postranslational modification.kinase.receptor like cytoplasmatic kinase VI	highly similar to ( 505) AT1G21590 | Symbols: | protein kinase family protein | chr1:7566613-7569694 REVERSEweakly similar to ( 196) NORK_MEDTR Nodulation receptor kinase precursor (EC 2.7.11.1) (Does not make infections protein 2) (Symbiosis receptor-like kinase) (MtSYMRK) - Medicago truncatula (Barrel medic)highly similar to ( 755) loc_os11g08950 12011.m05092 protein ATP binding protein, putati…	1.48183	-	GO:0016301//kinase activity	-	gi|326530352|dbj|BAJ97602.1|/0/predicted protein [Hordeum vulgare subsp. vulgare]
GRMZM2G033014_T01	GRMZM2G033014		not assigned.unknown	very weakly similar to (83.6) loc_os09g12380 12009.m04501 protein no apical meristem protein, expressed seq=cds; coord=7:2717208..2718616:-1; parent_gene=GRMZM2G033014	1.22348	-	-	-	gi|226531003|ref|NP_001141353.1|/5.36403e-146/uncharacterized protein LOC100273444 [Zea mays]
GRMZM2G033871_T01	GRMZM2G033871		hormone metabolism.auxin.induced-regulated-responsive-activated	weakly similar to ( 112) loc_os03g45860 12003.m09609 protein OsSAUR17 - Auxin-responsive SAUR gene family member seq=cds; coord=1:258666379..258666717:1; parent_gene=GRMZM2G033871	1.69507	-	-	-	gi|242038645|ref|XP_002466717.1|/2.34385e-34/hypothetical protein SORBIDRAFT_01g012780 [Sorghum bicolor]
GRMZM2G034197_T01	GRMZM2G034197		lipid metabolism.lipid degradation.lipases.triacylglycerol lipase	moderately similar to ( 385) AT3G61680 | Symbols: | lipase class 3 family protein | chr3:22824630-22826926 FORWARDhighly similar to ( 740) loc_os01g43140 12001.m10577 protein triacylglycerol lipase, putative, expressed seq=cds; coord=8:144457778..144461277:1; parent_gene=GRMZM2G034197	1.80197	-	-	-	gi|242053637|ref|XP_002455964.1|/0/hypothetical protein SORBIDRAFT_03g028110 [Sorghum bicolor]
GRMZM2G034283_T01	GRMZM2G034283		redox.glutaredoxins	weakly similar to ( 152) AT5G39865 | Symbols: | glutaredoxin family protein | chr5:15965560-15966732 REVERSEmoderately similar to ( 360) loc_os03g07470 12003.m06261 protein glutaredoxin, putative seq=cds; coord=1:15068245..15069580:1; parent_gene=GRMZM2G034283	3.29751	-	-	-	gi|308080026|ref|NP_001182925.1|/1.98019e-134/uncharacterized protein LOC100501215 [Zea mays]
GRMZM2G034360_T01	GRMZM2G034360		not assigned.unknown	highly similar to ( 542) AT5G41040 | Symbols: | transferase family protein | chr5:16431582-16433086 FORWARDweakly similar to ( 198) HCBT2_DIACA Anthranilate N-benzoyltransferase protein 2 (EC 2.3.1.144) (Anthranilate N-hydroxycinnamoyl/benzoyltransferase 2) - Dianthus caryophyllus (Carnation) (Clove pink)highly similar to ( 742) loc_os11g31090 12011.m07014 protein transferase, putative, expressed…	2.2953	-	GO:0016747//transferase activity, transferring acyl groups other than amino-acyl groups	-	gi|223948577|gb|ACN28372.1|/0/unknown [Zea mays]
GRMZM2G035170_T01	GRMZM2G035170		not assigned.unknown	moderately similar to ( 241) AT5G52060 | Symbols: ATBAG1 | ATBAG1 (ARABIDOPSIS THALIANA BCL-2-ASSOCIATED ATHANOGENE 1); protein binding | chr5:21152449-21153741 REVERSEmoderately similar to ( 342) loc_os09g35630 12009.m06514 protein protein binding protein, putative, expressed seq=cds; coord=2:194635980..194637906:-1; parent_gene=GRMZM2G035170	3.33947	GO:0031410//cytoplasmic vesicle	GO:0005488//binding	GO:0012501//programmed cell death	gi|195635491|gb|ACG37214.1|/8.69221e-103/protein binding protein [Zea mays]
GRMZM2G035994_T01	GRMZM2G035994		misc.oxidases - copper, flavone etc.	moderately similar to ( 361) AT4G29720 | Symbols: ATPAO5 | ATPAO5 (Polyamine oxidase 5); amine oxidase/ electron carrier/ oxidoreductase | chr4:14553456-14555057 REVERSEvery weakly similar to (84.0) PAO_MAIZE Polyamine oxidase precursor (EC 1.5.3.11) - Zea mays (Maize)highly similar to ( 729) loc_os01g51320 12001.m11313 protein peroxisomal N1-acetyl-spermine/spermidine oxidase, putative, expresse…	1.89425	-	-	-	gi|293332221|ref|NP_001169333.1|/0/uncharacterized protein LOC100383200 [Zea mays]
GRMZM2G036092_T01	GRMZM2G036092		RNA.regulation of transcription.bHLH,Basic Helix-Loop-Helix family	very weakly similar to ( 100) AT1G26945 | Symbols: KDR | KDR (KIDARI); transcription regulator | chr1:9351571-9352474 FORWARDweakly similar to ( 155) loc_os02g51320 12002.m10166 protein DNA binding protein, putative, expressed seq=cds; coord=5:207504983..207506597:-1; parent_gene=GRMZM2G036092	1.14849	GO:0009536//plastid	-	GO:0010468//regulation of gene expression;GO:0009314//response to radiation	gi|226491634|ref|NP_001152510.1|/1.25673e-31/DNA binding protein [Zea mays]
GRMZM2G036245_T01	GRMZM2G036245		not assigned.unknown	seq=cds; coord=3:203682944..203684857:-1; parent_gene=GRMZM2G036245	5.16609	-	-	-	-
GRMZM2G036365_T01	GRMZM2G036365		RNA.regulation of transcription.unclassified	weakly similar to ( 171) AT1G64830 | Symbols: | aspartyl protease family protein | chr1:24091271-24092566 REVERSEmoderately similar to ( 269) loc_os01g50170 12001.m11201 protein aspartic proteinase nepenthesin-1 precursor, putative, expressed seq=cds; coord=4:203833126..203834691:-1; parent_gene=GRMZM2G036365	3.6694	-	GO:0008233//peptidase activity	-	gi|242070719|ref|XP_002450636.1|/6.33765e-151/hypothetical protein SORBIDRAFT_05g008470 [Sorghum bicolor]
GRMZM2G036508_T01	GRMZM2G036508		not assigned.unknown	seq=cds; coord=10:11748575..11749147:-1; parent_gene=GRMZM2G036508	2.33996	-	-	-	gi|242085012|ref|XP_002442931.1|/5.18117e-20/hypothetical protein SORBIDRAFT_08g005030 [Sorghum bicolor]
GRMZM2G036940_T01	GRMZM2G036940		transport.ABC transporters and multidrug resistance systems	moderately similar to ( 466) AT5G19410 | Symbols: | ABC transporter family protein | chr5:6545237-6547111 REVERSEweakly similar to ( 150) PDR15_ORYSA Pleiotropic drug resistance protein 15 - Oryza sativa (Rice)moderately similar to ( 359) loc_os01g42900 12001.m10554 protein ATPase, coupled to transmembrane movement of substances, putative, expressed seq=cds; coord=6:142751000..142753570:-1; paren…	3.35255	GO:0031224//intrinsic to membrane	GO:0017111//nucleoside-triphosphatase activity;GO:0032559	-	gi|195615618|gb|ACG29639.1|/0/ATPase, coupled to transmembrane movement of substances [Zea mays]
GRMZM2G036980_T01	GRMZM2G036980		not assigned.unknown	seq=cds; coord=8:120149428..120150492:-1; parent_gene=GRMZM2G036980	4.85601	-	-	-	gi|226528675|ref|NP_001149386.1|/6.85926e-44/VQ motif family protein [Zea mays]
GRMZM2G037146_T01	GRMZM2G037146		stress.abiotic.heat	very weakly similar to (88.2) AT2G27140 | Symbols: | heat shock family protein | chr2:11598496-11599264 REVERSEweakly similar to ( 163) loc_os03g45340 12003.m09563 protein small heat shock-like protein, putative, expressed seq=cds; coord=5:15516125..15517767:1; parent_gene=GRMZM2G037146	1.26514	-	-	-	gi|293331711|ref|NP_001168326.1|/2.11775e-119/uncharacterized protein LOC100382094 [Zea mays]
GRMZM2G037485_T01	GRMZM2G037485		not assigned.unknown	moderately similar to ( 210) loc_os09g04310 12009.m03800 protein expressed protein seq=cds; coord=9:100740103..100741586:1; parent_gene=GRMZM2G037485	7.61524	-	-	-	gi|293331425|ref|NP_001168583.1|/6.37894e-137/uncharacterized protein LOC100382367 [Zea mays]
GRMZM2G038335_T01	GRMZM2G038335		protein.degradation.ubiquitin.E3.RING	very weakly similar to (83.2) AT5G05810 | Symbols: ATL43 | ATL43; protein binding / zinc ion binding | chr5:1746938-1747999 FORWARDmoderately similar to ( 208) loc_os02g15120 12002.m06755 protein RING-H2 finger protein ATL1N precursor, putative, expressed seq=cds; coord=4:226284424..226285475:-1; parent_gene=GRMZM2G038335	1.27452	-	GO:0046914//transition metal ion binding	-	gi|195650399|gb|ACG44667.1|/2.99056e-84/RING-H2 finger protein ATL1N precursor [Zea mays]
GRMZM2G038874_T01	GRMZM2G038874		not assigned.unknown	seq=cds; coord=5:142045819..142046459:-1; parent_gene=GRMZM2G038874	1.19527	GO:0043231//intracellular membrane-bounded organelle	GO:0034062//RNA polymerase activity;GO:0003676//nucleic acid binding	GO:0010467//gene expression	gi|94502587|ref|YP_588409.1|/5.04073e-97/hypothetical protein ZeamMp164 [Zea mays subsp. mays]
GRMZM2G038928_T01	GRMZM2G038928		RNA.regulation of transcription.unclassified	moderately similar to ( 270) AT2G03200 | Symbols: | aspartyl protease family protein | chr2:966506-967891 REVERSEhighly similar to ( 564) loc_os06g10670 12006.m05785 protein aspartic proteinase nepenthesin-1 precursor, putative, expressed seq=cds; coord=9:8660027..8661399:-1; parent_gene=GRMZM2G038928	1.11605	-	GO:0004175//endopeptidase activity	GO:0019538//protein metabolic process	gi|242092368|ref|XP_002436674.1|/0/hypothetical protein SORBIDRAFT_10g006870 [Sorghum bicolor]
GRMZM2G039362_T01	GRMZM2G039362		signalling.calcium	moderately similar to ( 219) loc_os12g32190 12012.m07025 protein expressed protein seq=cds; coord=6:18646167..18647732:1; parent_gene=GRMZM2G039362	1.16873	-	-	-	gi|226509982|ref|NP_001144725.1|/0/uncharacterized protein LOC100277767 [Zea mays]
GRMZM2G039383_T01	GRMZM2G039383		not assigned.unknown	seq=cds; coord=6:86281901..86282589:-1; parent_gene=GRMZM2G039383	1.112	GO:0031410//cytoplasmic vesicle	-	GO:0006810//transport	gi|226502857|ref|NP_001149680.1|/5.93605e-25/nonspecific lipid-transfer protein precursor [Zea mays]
GRMZM2G039993_T01	GRMZM2G039993		hormone metabolism.salicylic acid.synthesis-degradation	moderately similar to ( 246) AT5G66430 | Symbols: | S-adenosyl-L-methionine:carboxyl methyltransferase family protein | chr5:26525410-26526799 REVERSEmoderately similar to ( 254) BAMT_ANTMA Benzoate carboxyl methyltransferase (EC 2.1.1.-) (S-adenosyl-L-methionine:benzoic acid carboxyl methyltransferase) - Antirrhinum majus (Garden snapdragon)moderately similar to ( 430) loc_os06g13350 12006.m0605…	2.18184	-	GO:0016741	-	gi|308044243|ref|NP_001183238.1|/0/uncharacterized protein LOC100501626 [Zea mays]
GRMZM2G040068_T01	GRMZM2G040068		not assigned.unknown	highly similar to ( 559) AT5G41460 | Symbols: | fringe-related protein | chr5:16589724-16592197 REVERSEhighly similar to ( 873) loc_os10g39020 12010.m065319 protein transferase, transferring glycosyl groups, putative, expressed seq=cds; coord=1:82796739..82798866:-1; parent_gene=GRMZM2G040068	1.30937	GO:0031410//cytoplasmic vesicle	GO:0003824//catalytic activity	-	gi|242035253|ref|XP_002465021.1|/0/hypothetical protein SORBIDRAFT_01g030630 [Sorghum bicolor]
GRMZM2G040069_T02	GRMZM2G040069		not assigned.unknown	seq=cds; coord=3:41396922..41403850:-1; parent_gene=GRMZM2G040069	1.57556	-	-	-	gi|226531780|ref|NP_001147196.1|/8.92454e-06/deleted in split hand/splt foot protein 1 [Zea mays]
GRMZM2G040263_T01	GRMZM2G040263		signalling.receptor kinases.leucine rich repeat III	moderately similar to ( 372) AT3G17840 | Symbols: RLK902 | RLK902; ATP binding / kinase/ protein serine/threonine kinase | chr3:6106092-6108430 FORWARDweakly similar to ( 118) PSKR_DAUCA Phytosulfokine receptor precursor (EC 2.7.11.1) (Phytosulfokine LRR receptor kinase) - Daucus carota (Carrot)highly similar to ( 607) loc_os08g33090 12008.m07301 protein receptor kinase, putative, expressed seq=c…	1.18184	GO:0016020//membrane;GO:0031410//cytoplasmic vesicle	GO:0016301//kinase activity;GO:0000166//nucleotide binding	-	gi|259490609|ref|NP_001159226.1|/0/uncharacterized protein LOC100304312 [Zea mays]
GRMZM2G040268_T01	GRMZM2G040268		not assigned.unknown	seq=cds; coord=9:148910956..148911637:1; parent_gene=GRMZM2G040268	1.96598	-	-	-	gi|242036615|ref|XP_002465702.1|/1.69966e-16/hypothetical protein SORBIDRAFT_01g044080 [Sorghum bicolor]
GRMZM2G041448_T01	GRMZM2G041448		not assigned.unknown	seq=cds; coord=3:143090933..143091433:1; parent_gene=GRMZM2G041448	1.14696	-	-	-	gi|195618732|gb|ACG31196.1|/7.7763e-31/hypothetical protein [Zea mays]
GRMZM2G041761_T01	GRMZM2G041761		development.unspecified	very weakly similar to (91.7) AT2G36026 | Symbols: | FUNCTIONS IN: molecular_function unknown; INVOLVED IN: biological_process unknown; LOCATED IN: cellular_component unknown; CONTAINS InterPro DOMAIN/s: Protein of unknown function DUF623, plant (InterPro:IPR006458); BEST Arabidopsis thaliana protein match is: OFP6 (OVATE FAMILY PROTEIN 6) (TAIR:AT3G52525.1); Has 230 Blast hits to 230 proteins in…	1.42289	GO:0043231//intracellular membrane-bounded organelle	-	-	gi|226496053|ref|NP_001148277.1|/6.04872e-97/plant-specific domain TIGR01568 family protein [Zea mays]
GRMZM2G041959_T01	GRMZM2G041959		protein.degradation.ubiquitin.E3.SCF.FBOX	moderately similar to ( 444) AT1G74510 | Symbols: | kelch repeat-containing F-box family protein | chr1:28006065-28007420 FORWARDhighly similar to ( 711) loc_os02g51350 12002.m10169 protein kelch motif family protein, expressed seq=cds; coord=4:181884816..181889886:1; parent_gene=GRMZM2G041959	1.2715	-	-	-	gi|293333999|ref|NP_001168670.1|/0/uncharacterized protein LOC100382458 [Zea mays]
GRMZM2G042612_T01	GRMZM2G042612		not assigned.unknown	very weakly similar to (93.6) loc_os07g38470 12007.m08093 protein expressed protein seq=cds; coord=2:206270318..206271135:1; parent_gene=GRMZM2G042612	4.67177	GO:0043231//intracellular membrane-bounded organelle	-	-	gi|195622876|gb|ACG33268.1|/1.41392e-21/hypothetical protein [Zea mays]
GRMZM2G043117_T01	GRMZM2G043117		not assigned.unknown	weakly similar to ( 192) AT5G23100 | Symbols: | unknown protein | chr5:7753557-7754390 FORWARDmoderately similar to ( 300) loc_os01g45510 12001.m10753 protein plant-specific domain TIGR01570 family protein seq=cds; coord=8:146746367..146747665:1; parent_gene=GRMZM2G043117	1.32708	-	-	-	gi|226502124|ref|NP_001151601.1|/4.57815e-104/plant-specific domain TIGR01570 family protein [Zea mays]
GRMZM2G043802_T01	GRMZM2G043802		not assigned.unknown	weakly similar to ( 154) AT2G21990 | Symbols: | unknown protein | chr2:9359573-9360331 REVERSEmoderately similar to ( 380) loc_os03g59690 12003.m10865 protein plant-specific domain TIGR01570 family protein seq=cds; coord=5:3084310..3085259:1; parent_gene=GRMZM2G043802	2.21786	-	-	-	gi|242032537|ref|XP_002463663.1|/7.63183e-121/hypothetical protein SORBIDRAFT_01g003810 [Sorghum bicolor]
GRMZM2G045027_T01	GRMZM2G045027		stress.biotic.PR-proteins	moderately similar to ( 350) AT3G14470 | Symbols: | disease resistance protein (NBS-LRR class), putative | chr3:4857940-4861104 FORWARDhighly similar to ( 728) loc_os10g36270 12010.m06438 protein disease resistance RPP13-like protein 1, putative, expressed seq=cds; coord=1:225341943..225345923:-1; parent_gene=GRMZM2G045027	6.46194	-	-	-	gi|212720691|ref|NP_001132282.1|/0/uncharacterized protein LOC100193721 [Zea mays]
GRMZM2G046101_T02	GRMZM2G046101		not assigned.unknown	seq=cds; coord=1:258045446..258048187:-1; parent_gene=GRMZM2G046101	1.27979	-	-	-	-
GRMZM2G046729_T03	GRMZM2G046729		signalling.receptor kinases.leucine rich repeat III	moderately similar to ( 246) AT3G17840 | Symbols: RLK902 | RLK902; ATP binding / kinase/ protein serine/threonine kinase | chr3:6106092-6108430 FORWARDweakly similar to ( 111) PSKR_DAUCA Phytosulfokine receptor precursor (EC 2.7.11.1) (Phytosulfokine LRR receptor kinase) - Daucus carota (Carrot)moderately similar to ( 389) loc_os03g12250 12003.m06675 protein atypical receptor-like kinase MARK, pu…	1.19621	GO:0031224//intrinsic to membrane	GO:0004871//signal transducer activity;GO:0004672//protein kinase activity;GO:0032559	GO:0006464//cellular protein modification process	gi|219885007|gb|ACL52878.1|/1.33457e-132/unknown [Zea mays]
GRMZM2G047065_T01	GRMZM2G047065		not assigned.unknown	weakly similar to ( 146) loc_os04g33860 12004.m08480 protein expressed protein seq=cds; coord=10:114655392..114656143:1; parent_gene=GRMZM2G047065	3.85457	-	-	-	gi|226495707|ref|NP_001145334.1|/1.98781e-40/uncharacterized protein LOC100278661 [Zea mays]
GRMZM2G047262_T01	GRMZM2G047262		not assigned.unknown	moderately similar to ( 476) AT1G06750 | Symbols: | unknown protein | chr1:2073882-2076350 FORWARDhighly similar to ( 681) loc_os01g56764 12001.m11833 protein expressed protein seq=cds; coord=3:192019789..192022335:1; parent_gene=GRMZM2G047262	1.62423	-	GO:0032559	-	gi|242058867|ref|XP_002458579.1|/0/hypothetical protein SORBIDRAFT_03g036110 [Sorghum bicolor]
GRMZM2G047448_T01	GRMZM2G047448		RNA.regulation of transcription.HB,Homeobox transcription factor family	weakly similar to ( 121) AT2G17950 | Symbols: WUS, PGA6, WUS1 | WUS (WUSCHEL); DNA binding / protein binding / transcription factor/ transcription regulator | chr2:7809100-7810671 REVERSEweakly similar to ( 122) WUS_ANTMA Protein WUSCHEL (Protein ROSULATA) - Antirrhinum majus (Garden snapdragon)weakly similar to ( 186) loc_os04g56780 12004.m10565 protein protein WUSCHEL, putative, expressed seq=c…	4.8275	GO:0043231//intracellular membrane-bounded organelle	GO:0003677//DNA binding;GO:0001071//nucleic acid binding transcription factor activity	GO:0010468//regulation of gene expression;GO:0006351//transcription, DNA-dependent;GO:0009791//post-embryonic development;GO:0048869//cellular developmental process	gi|162460274|ref|NP_001105960.1|/4.3827e-101/WUS1 protein [Zea mays]
GRMZM2G048928_T03	GRMZM2G048928		not assigned.unknown	moderately similar to ( 333) AT1G24560 | Symbols: | unknown protein | chr1:8702644-8705640 FORWARDhighly similar to ( 658) loc_os09g39200 12009.m06859 protein expressed protein seq=cds; coord=2:166337129..166343501:1; parent_gene=GRMZM2G048928	1.53644	-	-	-	gi|212275256|ref|NP_001130811.1|/0/uncharacterized protein LOC100191915 [Zea mays]
GRMZM2G048952_T01	GRMZM2G048952		not assigned.unknown	seq=cds; coord=5:118430234..118430908:1; parent_gene=GRMZM2G048952	1.13507	-	-	-	gi|195609922|gb|ACG26791.1|/2.15317e-24/hypothetical protein [Zea mays]
GRMZM2G050333_T01	GRMZM2G050333		not assigned.unknown	seq=cds; coord=9:24457998..24458949:-1; parent_gene=GRMZM2G050333	1.6096	-	-	-	gi|242091820|ref|XP_002436400.1|/6.85578e-91/hypothetical protein SORBIDRAFT_10g001850 [Sorghum bicolor]
GRMZM2G050450_T01	GRMZM2G050450		stress.biotic	moderately similar to ( 342) AT5G17540 | Symbols: | transferase family protein | chr5:5782061-5783682 REVERSEweakly similar to ( 141) HCBT1_DIACA Anthranilate N-benzoyltransferase protein 1 (EC 2.3.1.144) (Anthranilate N-hydroxycinnamoyl/benzoyltransferase 1) - Dianthus caryophyllus (Carnation) (Clove pink)highly similar to ( 764) loc_os06g49660 12006.m09490 protein taxadien-5-alpha-ol O-acetyltr…	9.18355	-	GO:0016746//transferase activity, transferring acyl groups	-	gi|242097006|ref|XP_002438993.1|/0/hypothetical protein SORBIDRAFT_10g029610 [Sorghum bicolor]
GRMZM2G050997_T01	GRMZM2G050997		hormone metabolism.cytokinin.synthesis-degradation	highly similar to ( 652) AT2G41510 | Symbols: ATCKX1, CKX1 | CKX1 (CYTOKININ OXIDASE/DEHYDROGENASE 1); cytokinin dehydrogenase | chr2:17314626-17316861 FORWARDmoderately similar to ( 404) CKX1_MAIZE Cytokinin dehydrogenase 1 precursor (EC 1.5.99.12) (Cytokinin oxidase 1) (CKO 1) (COX 1) (ZmCKX1) - Zea mays (Maize)highly similar to ( 865) loc_os01g71310 12001.m13174 protein cytokinin dehydrogenase…	3.856	GO:0031410//cytoplasmic vesicle	GO:0030554//adenyl nucleotide binding;GO:0016645//oxidoreductase activity, acting on the CH-NH group of donors	GO:0006725//cellular aromatic compound metabolic process;GO:0006091//generation of precursor metabolites and energy	gi|162461160|ref|NP_001105526.1|/0/cytokinin oxidase 2 precursor [Zea mays]
GRMZM2G053117_T02	GRMZM2G053117		signalling.MAP kinases	weakly similar to ( 157) AT2G42880 | Symbols: ATMPK20 | ATMPK20; MAP kinase | chr2:17840572-17843947 REVERSEmoderately similar to ( 233) MPK9_ORYSA Mitogen-activated protein kinase 9 (EC 2.7.11.24) (MAP kinase 9) - Oryza sativa (Rice)moderately similar to ( 209) loc_os01g43910 12001.m10650 protein OsMPK20-1 - putative MAPK based on amino acid sequence homology, expressed seq=cds; coord=1:19621597…	1.29227	-	GO:0004674//protein serine/threonine kinase activity;GO:0000166//nucleotide binding	-	gi|194690280|gb|ACF79224.1|/3.75746e-101/unknown [Zea mays]
GRMZM2G053503_T01	GRMZM2G053503		not assigned.unknown	seq=cds; coord=8:35561736..35562264:1; parent_gene=GRMZM2G053503	1.44834	-	-	GO:0006350	gi|195645506|gb|ACG42221.1|/4.80691e-40/ethylene-responsive factor-like protein 1 [Zea mays]
GRMZM2G053779_T01	GRMZM2G053779		misc.plastocyanin-like	weakly similar to ( 103) AT1G72230 | Symbols: | plastocyanin-like domain-containing protein | chr1:27188287-27189093 FORWARDweakly similar to ( 120) BCP_PEA Blue copper protein precursor - Pisum sativum (Garden pea)weakly similar to ( 137) loc_os02g52180 12002.m10249 protein uclacyanin-2 precursor, putative, expressed seq=cds; coord=7:128870093..128871059:1; parent_gene=GRMZM2G053779	2.03769	GO:0031410//cytoplasmic vesicle	GO:0046914//transition metal ion binding	-	gi|195625854|gb|ACG34757.1|/6.9303e-51/blue copper protein precursor [Zea mays]
GRMZM2G055070_T01	GRMZM2G055070		RNA.regulation of transcription.AP2/EREBP, APETALA2/Ethylene-responsive element binding protein family	very weakly similar to ( 100) AT1G12890 | Symbols: | AP2 domain-containing transcription factor, putative | chr1:4391734-4392393 FORWARDvery weakly similar to (81.3) ERF4_NICSY Ethylene-responsive transcription factor 4 (Ethylene-responsive element-binding factor 4 homolog) (EREBP-3) (NsERF3) - Nicotiana sylvestris (Wood tobacco)weakly similar to ( 132) loc_os08g07700 12008.m04908 protein ethylen…	1.93477	GO:0043231//intracellular membrane-bounded organelle	GO:0003676//nucleic acid binding;GO:0001071//nucleic acid binding transcription factor activity	GO:0010468//regulation of gene expression;GO:0006351//transcription, DNA-dependent	gi|242080733|ref|XP_002445135.1|/3.31648e-41/hypothetical protein SORBIDRAFT_07g004655 [Sorghum bicolor]
GRMZM2G055154_T01	GRMZM2G055154		protein.postranslational modification.kinase.receptor like cytoplasmatic kinase VII	moderately similar to ( 442) AT2G17220 | Symbols: | protein kinase, putative | chr2:7487866-7489768 REVERSEmoderately similar to ( 228) NORK_MEDTR Nodulation receptor kinase precursor (EC 2.7.11.1) (Does not make infections protein 2) (Symbiosis receptor-like kinase) (MtSYMRK) - Medicago truncatula (Barrel medic)highly similar to ( 585) loc_os06g51170 12006.m09640 protein serine/threonine-protein…	1.45328	GO:0043231//intracellular membrane-bounded organelle	GO:0004713//protein tyrosine kinase activity;GO:0032559	GO:0006464//cellular protein modification process	gi|242097152|ref|XP_002439066.1|/0/hypothetical protein SORBIDRAFT_10g030880 [Sorghum bicolor]
GRMZM2G055279_T01	GRMZM2G055279		transport.metal	seq=cds; coord=2:55785834..55786712:-1; parent_gene=GRMZM2G055279	2.1791	-	-	-	gi|226504608|ref|NP_001150814.1|/2.31033e-20/copper transporter 1 [Zea mays]
GRMZM2G056469_T01	GRMZM2G056469		secondary metabolism.N misc.alkaloid-like	moderately similar to ( 491) AT2G20340 | Symbols: | tyrosine decarboxylase, putative | chr2:8779804-8782490 FORWARDhighly similar to ( 509) TYDC2_PETCR Tyrosine decarboxylase 2 (EC 4.1.1.25) - Petroselinum crispum (Parsley) (Petroselinum hortense)highly similar to ( 801) loc_os01g56380 12001.m11794 protein tyrosine/DOPA decarboxylase 2, putative, expressed seq=cds; coord=1:17829269..17830963:-1; …	6.89327	-	GO:0048037//cofactor binding;GO:0016830//carbon-carbon lyase activity	GO:0043436	gi|226528393|ref|NP_001152297.1|/0/LOC100285936 [Zea mays]
GRMZM2G056627_T01	GRMZM2G056627		cell wall.cellulose synthesis.COBRA	highly similar to ( 774) AT3G20580 | Symbols: COBL10 | COBL10 (COBRA-LIKE PROTEIN 10 PRECURSOR) | chr3:7188063-7190416 REVERSEweakly similar to ( 153) COBL1_ORYSA COBRA-like 1 protein precursor (BRITTLE CULM1-like 6 protein) - Oryza sativa (Rice)nearly identical (1078) loc_os06g47110 12006.m09237 protein COBRA-like protein 7 precursor, putative, expressed seq=cds; coord=7:154119299..154121833:-1;…	1.0281	GO:0031224//intrinsic to membrane;GO:0031410//cytoplasmic vesicle	-	-	gi|162460168|ref|NP_001105996.1|/0/brittle stalk-2-like protein 5 precursor [Zea mays]
GRMZM2G056988_T01	GRMZM2G056988		development.unspecified	weakly similar to ( 108) loc_os02g37970 12002.m08885 protein expressed protein seq=cds; coord=5:179837371..179844994:-1; parent_gene=GRMZM2G056988	1.72096	-	-	-	gi|226502248|ref|NP_001144861.1|/1.12202e-60/uncharacterized protein LOC100277951 [Zea mays]
GRMZM2G057116_T01	GRMZM2G057116		RNA.regulation of transcription.WRKY domain transcription factor family	weakly similar to ( 135) AT5G26170 | Symbols: WRKY50, ATWRKY50 | WRKY50; transcription factor | chr5:9147176-9148128 REVERSEweakly similar to ( 193) loc_os05g09020 12005.m27728 protein OsWRKY67 - Superfamily of rice TFs having WRKY and zinc finger domains, expressed seq=cds; coord=8:88963901..88965293:-1; parent_gene=GRMZM2G057116	3.53726	GO:0043231//intracellular membrane-bounded organelle	GO:0003677//DNA binding;GO:0001071//nucleic acid binding transcription factor activity	GO:0010468//regulation of gene expression	gi|323388759|gb|ADX60184.1|/3.9413e-87/WRKY transcription factor [Zea mays]
GRMZM2G057305_T01	GRMZM2G057305		not assigned.unknown	highly similar to ( 533) loc_os01g16620 12001.m08258 protein expressed protein seq=cds; coord=3:41262337..41265542:-1; parent_gene=GRMZM2G057305	1.25191	GO:0043231//intracellular membrane-bounded organelle	-	-	gi|224028949|gb|ACN33550.1|/0/unknown [Zea mays]
GRMZM2G057779_T01	GRMZM2G057779		protein.glycosylation	weakly similar to ( 199) AT5G57500 | Symbols: | transferase, transferring glycosyl groups | chr5:23286406-23287525 REVERSEmoderately similar to ( 380) loc_os09g26300 12009.m05782 protein hypro1, putative, expressed seq=cds; coord=2:183198559..183200448:-1; parent_gene=GRMZM2G057779	1.01345	GO:0043231//intracellular membrane-bounded organelle;GO:0016020//membrane;GO:0031410//cytoplasmic vesicle	GO:0016757//transferase activity, transferring glycosyl groups	-	gi|223947887|gb|ACN28027.1|/0/unknown [Zea mays]
GRMZM2G058690_T01	GRMZM2G058690		not assigned.unknown	weakly similar to ( 130) loc_os05g44630 12005.m08588 protein IQ calmodulin-binding motif family protein, expressed seq=cds; coord=8:124645482..124648145:-1; parent_gene=GRMZM2G058690	1.68097	-	-	-	gi|308081462|ref|NP_001183481.1|/3.91345e-64/uncharacterized protein LOC100501913 [Zea mays]
GRMZM2G059064_T01	GRMZM2G059064		not assigned.unknown	seq=cds; coord=1:179720212..179720868:1; parent_gene=GRMZM2G059064	1.74925	-	-	-	gi|226529233|ref|NP_001152616.1|/6.85373e-20/VQ motif family protein [Zea mays]
GRMZM2G059700_T01	GRMZM2G059700		not assigned.unknown	highly similar to ( 817) loc_os01g52900 12001.m11463 protein expressed protein seq=cds; coord=3:201092983..201095214:1; parent_gene=GRMZM2G059700	1.79453	-	GO:0048037//cofactor binding	-	gi|293334103|ref|NP_001169601.1|/0/uncharacterized protein LOC100383482 [Zea mays]
GRMZM2G060116_T01	GRMZM2G060116		RNA.regulation of transcription.NAC domain transcription factor family	weakly similar to ( 101) AT5G08790 | Symbols: ATAF2, anac081 | ATAF2; transcription activator | chr5:2859113-2860144 REVERSEweakly similar to ( 129) NAC67_ORYSA NAC domain-containing protein 67 (ONAC067) - Oryza sativa (Rice)moderately similar to ( 233) loc_os03g60080 12003.m10901 protein NAC domain-containing protein 67, putative, expressed seq=cds; coord=3:155846153..155847295:1; parent_gene=GR…	2.55877	-	-	-	gi|323388809|gb|ADX60209.1|/1.29447e-79/NAC transcription factor [Zea mays]
GRMZM2G060517_T01	GRMZM2G060517		RNA.regulation of transcription.AP2/EREBP, APETALA2/Ethylene-responsive element binding protein family	weakly similar to ( 129) AT5G43410 | Symbols: | ethylene-responsive factor, putative | chr5:17435010-17435405 REVERSEvery weakly similar to (99.8) ERF5_NICSY Ethylene-responsive transcription factor 5 (Ethylene-responsive element-binding factor 5 homolog) (EREBP-4) (NsERF4) - Nicotiana sylvestris (Wood tobacco)weakly similar to ( 153) loc_os09g39810 12009.m06918 protein pathogenesis-related genes…	1.25808	-	-	GO:0006350	gi|357154758|ref|XP_003576892.1|/9.70901e-39/PREDICTED: ethylene-responsive transcription factor ERF096-like [Brachypodium distachyon]
GRMZM2G060872_T04	GRMZM2G060872		protein.postranslational modification	weakly similar to ( 124) loc_os09g06230 12009.m03893 protein serine/threonine-protein kinase 16, putative, expressed seq=cds; coord=2:162097583..162098657:-1; parent_gene=GRMZM2G060872	1.06907	-	GO:0016301//kinase activity;GO:0032559	GO:0006464//cellular protein modification process	gi|223944593|gb|ACN26380.1|/2.73885e-32/unknown [Zea mays]
GRMZM2G060876_T01	GRMZM2G060876		RNA.regulation of transcription.AP2/EREBP, APETALA2/Ethylene-responsive element binding protein family	very weakly similar to (85.9) AT5G13910 | Symbols: LEP | LEP (LEAFY PETIOLE); DNA binding / transcription factor | chr5:4482450-4483085 REVERSEvery weakly similar to (91.3) loc_os04g32790 12004.m08376 protein AP2 domain containing protein, expressed seq=cds; coord=7:165809813..165810646:-1; parent_gene=GRMZM2G060876	1.14834	GO:0043231//intracellular membrane-bounded organelle	GO:0003676//nucleic acid binding;GO:0001071//nucleic acid binding transcription factor activity	GO:0009725//response to hormone stimulus;GO:0009845//seed germination;GO:0010468//regulation of gene expression;GO:0006351//transcription, DNA-dependent	gi|55741060|gb|AAV64202.1|/5.60843e-154/unknown [Zea mays]
GRMZM2G061403_T01	GRMZM2G061403		misc.beta 1,3 glucan hydrolases.glucan endo-1,3-beta-glucosidase	moderately similar to ( 256) AT3G57260 | Symbols: BGL2, PR2, BG2, PR-2 | BGL2 (BETA-1,3-GLUCANASE 2); cellulase/ glucan 1,3-beta-glucosidase/ hydrolase, hydrolyzing O-glycosyl compounds | chr3:21188709-21189822 REVERSEmoderately similar to ( 339) E13E_HORVU Glucan endo-1,3-beta-glucosidase GV (EC 3.2.1.39) ((1->3)-beta-glucan endohydrolase GV) ((1->3)-beta-glucanase isoenzyme GV) (Beta-1,3-endogl…	7.09913	GO:0031410//cytoplasmic vesicle	GO:0016798//hydrolase activity, acting on glycosyl bonds;GO:0043566//structure-specific DNA binding;GO:0043167//ion binding;GO:0042623//ATPase activity, coupled;GO:0032559	GO:0006259//DNA metabolic process	gi|242059871|ref|XP_002459081.1|/4.05947e-141/hypothetical protein SORBIDRAFT_03g045520 [Sorghum bicolor]
GRMZM2G061776_T01	GRMZM2G061776		misc.peroxidases	moderately similar to ( 276) AT4G30170 | Symbols: | peroxidase, putative | chr4:14762922-14764482 FORWARDweakly similar to ( 196) PERP7_BRARA Peroxidase P7 (EC 1.11.1.7) (TP7) - Brassica rapa (Turnip)moderately similar to ( 483) loc_os06g48020 12006.m09328 protein peroxidase 45 precursor, putative, expressed seq=cds; coord=5:53240113..53241805:1; parent_gene=GRMZM2G061776	1.13507	GO:0031410//cytoplasmic vesicle	GO:0016209//antioxidant activity;GO:0005506//iron ion binding;GO:0003824//catalytic activity	GO:0006950//response to stress;GO:0008152//metabolic process	gi|242094046|ref|XP_002437513.1|/2.50711e-169/hypothetical protein SORBIDRAFT_10g028470 [Sorghum bicolor]
GRMZM2G062031_T01	GRMZM2G062031		not assigned.unknown	moderately similar to ( 233) loc_os05g46190 12005.m08744 protein expressed protein seq=cds; coord=6:152896907..152898715:1; parent_gene=GRMZM2G062031	1.2706	-	-	-	gi|194702266|gb|ACF85217.1|/0/unknown [Zea mays]
GRMZM2G062121_T01	GRMZM2G062121		signalling.G-proteins	very weakly similar to (87.0) loc_os01g48360 12001.m11027 protein expressed protein seq=cds; coord=3:209655764..209656608:-1; parent_gene=GRMZM2G062121	1.40221	-	-	-	gi|242053951|ref|XP_002456121.1|/7.1244e-23/hypothetical protein SORBIDRAFT_03g030900 [Sorghum bicolor]
GRMZM2G062452_T01	GRMZM2G062452		not assigned.unknown	weakly similar to ( 104) AT1G57765 | Symbols: | unknown protein | chr1:21393493-21394534 FORWARDweakly similar to ( 149) loc_os05g34680 12005.m27827 protein expressed protein seq=cds; coord=6:147687274..147690102:-1; parent_gene=GRMZM2G062452	1.07264	GO:0031410//cytoplasmic vesicle	-	-	gi|226491009|ref|NP_001145178.1|/2.25219e-52/uncharacterized protein LOC100278419 precursor [Zea mays]
GRMZM2G062552_T02	GRMZM2G062552		not assigned.unknown	moderately similar to ( 260) AT3G18180 | Symbols: | transferase, transferring glycosyl groups | chr3:6230270-6231878 FORWARDhighly similar to ( 590) loc_os02g04250 12002.m33333 protein glycosyltransferase, putative, expressed seq=cds; coord=5:76428227..76430827:1; parent_gene=GRMZM2G062552	1.30802	GO:0043231//intracellular membrane-bounded organelle	GO:0016740//transferase activity	-	gi|226492922|ref|NP_001147068.1|/0/glycosyltransferase [Zea mays]
GRMZM2G062811_T01	GRMZM2G062811		cell wall.modification	moderately similar to ( 234) AT4G14130 | Symbols: XTR7 | XTR7 (XYLOGLUCAN ENDOTRANSGLYCOSYLASE 7); hydrolase, acting on glycosyl bonds / hydrolase, hydrolyzing O-glycosyl compounds / xyloglucan:xyloglucosyl transferase | chr4:8137161-8138196 REVERSEmoderately similar to ( 241) BRU1_SOYBN Brassinosteroid-regulated protein BRU1 precursor - Glycine max (Soybean)moderately similar to ( 350) loc_os08g…	1.83002	GO:0005576//extracellular region;GO:0031410//cytoplasmic vesicle;GO:0030312//external encapsulating structure	GO:0016798//hydrolase activity, acting on glycosyl bonds;GO:0016758//transferase activity, transferring hexosyl groups	GO:0044042//glucan metabolic process	gi|242078627|ref|XP_002444082.1|/2.95628e-133/hypothetical protein SORBIDRAFT_07g007020 [Sorghum bicolor]
GRMZM2G063880_T01	GRMZM2G063880		RNA.regulation of transcription.WRKY domain transcription factor family	very weakly similar to (98.6) AT5G24110 | Symbols: WRKY30, ATWRKY30 | WRKY30; transcription factor | chr5:8153416-8154633 REVERSEweakly similar to ( 182) loc_os05g49620 12005.m09032 protein OsWRKY19 - Superfamily of rice TFs having WRKY and zinc finger domains, expressed seq=cds; coord=8:72382998..72384377:-1; parent_gene=GRMZM2G063880	1.35366	-	-	-	gi|242088907|ref|XP_002440286.1|/3.08887e-90/hypothetical protein SORBIDRAFT_09g029050 [Sorghum bicolor]
GRMZM2G064106_T01	GRMZM2G064106		redox.ascorbate and glutathione.ascorbate	highly similar to ( 694) AT4G39830 | Symbols: | L-ascorbate oxidase, putative | chr4:18479103-18481184 FORWARDhighly similar to ( 581) ASO_CUCSA L-ascorbate oxidase precursor (EC 1.10.3.3) (Ascorbase) (ASO) - Cucumis sativus (Cucumber)highly similar to ( 907) loc_os09g20090 12009.m05216 protein L-ascorbate oxidase precursor, putative, expressed seq=cds; coord=7:99535861..99539292:-1; parent_gene=…	13.7159	-	GO:0046914//transition metal ion binding;GO:0016682//oxidoreductase activity, acting on diphenols and related substances as donors, oxygen as acceptor	GO:0008152//metabolic process	gi|293332797|ref|NP_001168369.1|/0/uncharacterized protein LOC100382137 precursor [Zea mays]
GRMZM2G064442_T01	GRMZM2G064442		not assigned.unknown	seq=cds; coord=3:51746883..51748089:-1; parent_gene=GRMZM2G064442	2.69304	GO:0043231//intracellular membrane-bounded organelle	-	GO:0008152//metabolic process	gi|226498976|ref|NP_001148318.1|/5.8497e-40/LOC100281927 [Zea mays]
GRMZM2G064679_T01	GRMZM2G064679		not assigned.unknown	weakly similar to ( 132) AT4G08330 | Symbols: | unknown protein | chr4:5255384-5256525 REVERSEmoderately similar to ( 212) loc_os05g39060 12005.m08085 protein expressed protein seq=cds; coord=6:152431251..152435434:-1; parent_gene=GRMZM2G064679	1.06808	-	GO:0016671//oxidoreductase activity, acting on a sulfur group of donors, disulfide as acceptor	GO:0008152//metabolic process	gi|226500622|ref|NP_001144678.1|/3.82425e-74/uncharacterized protein LOC100277705 [Zea mays]
GRMZM2G065423_T02	GRMZM2G065423		signalling.G-proteins	highly similar to ( 564) AT5G02010 | Symbols: ATROPGEF7, ROPGEF7 | ROPGEF7; Rho guanyl-nucleotide exchange factor | chr5:383493-385698 FORWARDhighly similar to ( 801) loc_os01g62990 12001.m12417 protein pollen-specific kinase partner protein, putative, expressed seq=cds; coord=3:179409310..179413570:1; parent_gene=GRMZM2G065423	1.03611	-	GO:0005088//Ras guanyl-nucleotide exchange factor activity	-	gi|224030489|gb|ACN34320.1|/0/unknown [Zea mays]
GRMZM2G065471_T01	GRMZM2G065471		Biodegradation of Xenobiotics	moderately similar to ( 215) AT5G06570 | Symbols: | hydrolase | chr5:2008075-2011013 REVERSEweakly similar to ( 128) GID1_ORYSA Gibberellin receptor GID1 (EC 3.-.-.-) (Gibberellin-insensitive dwarf protein 1) (Protein GIBBERELLIN INSENSITIVE DWARF1) - Oryza sativa (Rice)moderately similar to ( 362) loc_os01g06060 12001.m07237 protein gibberellin receptor GID1L2, putative, expressed seq=cds; coord…	1.02507	-	-	-	gi|242052065|ref|XP_002455178.1|/4.61217e-112/hypothetical protein SORBIDRAFT_03g005590 [Sorghum bicolor]
GRMZM2G066005_T01	GRMZM2G066005		signalling.calcium	very weakly similar to (85.9) loc_os01g72190 12001.m13254 protein expressed protein seq=cds; coord=3:149248716..149250454:-1; parent_gene=GRMZM2G066005	1.52952	-	-	-	gi|226508322|ref|NP_001142598.1|/1.06836e-140/uncharacterized protein LOC100274865 [Zea mays]
GRMZM2G066234_T01	GRMZM2G066234		not assigned.unknown	weakly similar to ( 103) loc_os03g43420 12003.m09388 protein single-strand binding protein, expressed seq=cds; coord=1:253280524..253281202:1; parent_gene=GRMZM2G066234	1.41048	-	GO:0003677//DNA binding	-	gi|238013788|gb|ACR37929.1|/9.71203e-41/unknown [Zea mays]
GRMZM2G066820_T01	GRMZM2G066820		transport.sugars	highly similar to ( 579) AT2G20780 | Symbols: | mannitol transporter, putative | chr2:8947496-8949170 REVERSEweakly similar to ( 169) HEX6_RICCO Hexose carrier protein HEX6 - Ricinus communis (Castor bean)highly similar to ( 809) loc_os04g44750 12004.m09432 protein arabinose-proton symporter, putative, expressed seq=cds; coord=2:23669090..23671685:1; parent_gene=GRMZM2G066820	2.43372	GO:0031224//intrinsic to membrane	GO:0016491//oxidoreductase activity;GO:0022857//transmembrane transporter activity	GO:0006810//transport	gi|226506500|ref|NP_001149076.1|/0/arabinose-proton symporter [Zea mays]
GRMZM2G066950_T01	GRMZM2G066950		misc.invertase/pectin methylesterase inhibitor family protein	very weakly similar to (96.7) AT3G36659 | Symbols: | invertase/pectin methylesterase inhibitor family protein | chr3:2100189-2100983 FORWARDweakly similar to ( 155) loc_os11g45220 12011.m08355 protein IWS1-like protein A, putative, expressed seq=cds; coord=2:230872984..230875028:-1; parent_gene=GRMZM2G066950	6.18181	GO:0044464//cell part	-	-	gi|219363123|ref|NP_001136946.1|/0/uncharacterized protein LOC100217105 precursor [Zea mays]
GRMZM2G067424_T01	GRMZM2G067424		misc.UDP glucosyl and glucoronyl transferases	weakly similar to ( 160) AT3G53160 | Symbols: UGT73C7 | UGT73C7 (UDP-glucosyl transferase 73C7); UDP-glycosyltransferase/ transferase, transferring glycosyl groups | chr3:19702485-19703957 REVERSEweakly similar to ( 126) ZOX_PHAVU Zeatin O-xylosyltransferase (EC 2.4.2.40) (Zeatin O-beta-D-xylosyltransferase) - Phaseolus vulgaris (Kidney bean) (French bean)moderately similar to ( 380) loc_os03g464…	1.41803	-	GO:0016757//transferase activity, transferring glycosyl groups	-	gi|226497732|ref|NP_001151546.1|/0/flavonol-3-O-glycoside-7-O-glucosyltransferase 1 [Zea mays]
GRMZM2G067563_T01	GRMZM2G067563		not assigned.unknown	moderately similar to ( 242) AT3G20300 | Symbols: | unknown protein | chr3:7079832-7081809 REVERSEmoderately similar to ( 422) loc_os02g35830 12002.m08671 protein expressed protein seq=cds; coord=5:175268637..175272854:1; parent_gene=GRMZM2G067563	1.59952	GO:0043231//intracellular membrane-bounded organelle	-	-	gi|226505716|ref|NP_001143249.1|/3.06584e-174/uncharacterized protein LOC100275775 [Zea mays]
GRMZM2G067946_T01	GRMZM2G067946		not assigned.unknown	seq=cds; coord=7:2873953..2874657:-1; parent_gene=GRMZM2G067946	2.71692	-	-	-	gi|242047252|ref|XP_002461372.1|/2.01372e-23/hypothetical protein SORBIDRAFT_02g001700 [Sorghum bicolor]
GRMZM2G068137_T01	GRMZM2G068137		not assigned.unknown	seq=cds; coord=6:95234541..95235194:1; parent_gene=GRMZM2G068137	1.75727	-	-	-	-
GRMZM2G068361_T02	GRMZM2G068361		not assigned.unknown	weakly similar to ( 162) loc_os01g66150 12001.m12723 protein expressed protein seq=cds; coord=8:164900504..164902420:1; parent_gene=GRMZM2G068361	1.79852	-	-	-	gi|226530472|ref|NP_001146504.1|/3.47727e-85/uncharacterized protein LOC100280094 [Zea mays]
GRMZM2G068682_T01	GRMZM2G068682		misc.oxidases - copper, flavone etc.	highly similar to ( 725) AT3G13390 | Symbols: sks11 | sks11 (SKU5 Similar 11); copper ion binding / oxidoreductase | chr3:4351401-4353289 REVERSEhighly similar to ( 732) ASO_BRANA L-ascorbate oxidase homolog precursor (EC 1.10.3.3) (Ascorbase) - Brassica napus (Rape)highly similar to ( 935) loc_os01g60080 12001.m12139 protein L-ascorbate oxidase homolog precursor, putative, expressed seq=cds; coo…	1.50681	GO:0031410//cytoplasmic vesicle	GO:0046914//transition metal ion binding;GO:0003824//catalytic activity	GO:0008152//metabolic process	gi|224030003|gb|ACN34077.1|/0/unknown [Zea mays]
GRMZM2G070034_T02	GRMZM2G070034		RNA.regulation of transcription.MADS box transcription factor family	moderately similar to ( 206) AT2G45660 | Symbols: AGL20, SOC1 | AGL20 (AGAMOUS-LIKE 20); transcription factor | chr2:18807799-18810193 REVERSEmoderately similar to ( 296) MAD56_ORYSA MADS-box transcription factor 56 (OsMADS56) (FDRMADS8) (RMADS214) - Oryza sativa (Rice)moderately similar to ( 296) loc_os10g39130 12010.m21952 protein MADS-box transcription factor 56, putative, expressed seq=cds; c…	1.53695	GO:0043231//intracellular membrane-bounded organelle	GO:0003677//DNA binding;GO:0001071//nucleic acid binding transcription factor activity	GO:0010468//regulation of gene expression;GO:0006351//transcription, DNA-dependent	gi|293331445|ref|NP_001168784.1|/1.84114e-120/uncharacterized protein LOC100382583 [Zea mays]
GRMZM2G070304_T01	GRMZM2G070304		lipid metabolism.Phospholipid synthesis	moderately similar to ( 356) AT1G02390 | Symbols: ATGPAT2, GPAT2 | GPAT2 (GLYCEROL-3-PHOSPHATE ACYLTRANSFERASE 2); acyltransferase | chr1:480921-483163 FORWARDhighly similar to ( 587) loc_os11g45400 12011.m08372 protein glycerol-3-phosphate acyltransferase 1, putative, expressed seq=cds; coord=2:230993928..230996088:1; parent_gene=GRMZM2G070304	2.26454	-	-	-	gi|242069409|ref|XP_002449981.1|/0/hypothetical protein SORBIDRAFT_05g026580 [Sorghum bicolor]
GRMZM2G072052_T01	GRMZM2G072052		signalling.calcium	weakly similar to ( 151) AT1G18530 | Symbols: | calmodulin, putative | chr1:6376783-6377256 FORWARDweakly similar to ( 104) CALM_CHLRE Calmodulin (CaM) - Chlamydomonas reinhardtiimoderately similar to ( 230) loc_os01g41990 12001.m10466 protein calmodulin, putative, expressed seq=cds; coord=3:223689349..223690339:-1; parent_gene=GRMZM2G072052	2.31939	GO:0043231//intracellular membrane-bounded organelle	-	-	gi|293331767|ref|NP_001167949.1|/1.84908e-72/uncharacterized protein LOC100381663 [Zea mays]
GRMZM2G072105_T01	GRMZM2G072105		protein.degradation.ubiquitin.E3.BTB/POZ Cullin3.BTB/POZ	very weakly similar to (92.4) loc_os11g41310 12011.m07973 protein snRNP protein, putative seq=cds; coord=4:59187683..59188724:-1; parent_gene=GRMZM2G072105	1.6544	-	-	-	gi|226532736|ref|NP_001144214.1|/1.18148e-133/uncharacterized protein LOC100277076 [Zea mays]
GRMZM2G072608_T01	GRMZM2G072608		C1-metabolism	moderately similar to ( 402) AT2G16370 | Symbols: THY-1 | THY-1 (THYMIDYLATE SYNTHASE 1); dihydrofolate reductase/ thymidylate synthase | chr2:7082038-7084333 REVERSEhighly similar to ( 552) DRTS_MAIZE Bifunctional dihydrofolate reductase-thymidylate synthase (DHFR-TS) [Includes: Dihydrofolate reductase (EC 1.5.1.3); Thymidylate synthase (EC 2.1.1.45)] - Zea mays (Maize)moderately similar to ( 49…	1.04326	-	GO:0042083//5,10-methylenetetrahydrofolate-dependent methyltransferase activity;GO:0016646//oxidoreductase activity, acting on the CH-NH group of donors, NAD or NADP as acceptor	GO:0009177;GO:0006544//glycine metabolic process	gi|162464289|ref|NP_001104916.1|/3.03392e-159/bifunctional dihydrofolate reductase-thymidylate synthase [Zea mays]
GRMZM2G073155_T01	GRMZM2G073155		not assigned.unknown	seq=cds; coord=1:292796431..292797030:1; parent_gene=GRMZM2G073155	3.83085	-	-	-	gi|195622430|gb|ACG33045.1|/1.70283e-08/hypothetical protein [Zea mays]
GRMZM2G073738_T01	GRMZM2G073738		misc.GDSL-motif lipase	weakly similar to ( 182) AT1G29660 | Symbols: | GDSL-motif lipase/hydrolase family protein | chr1:10371955-10373624 FORWARDweakly similar to ( 162) APG_BRANA Anter-specific proline-rich protein APG (Protein CEX) (Fragment) - Brassica napus (Rape)moderately similar to ( 417) loc_os02g44850 12002.m09525 protein anther-specific proline-rich protein APG precursor, putative seq=cds; coord=4:154258697.…	1.01614	GO:0031410//cytoplasmic vesicle	GO:0016787//hydrolase activity	GO:0044238//primary metabolic process	gi|242062966|ref|XP_002452772.1|/9.20836e-135/hypothetical protein SORBIDRAFT_04g032270 [Sorghum bicolor]
GRMZM2G073969_T01	GRMZM2G073969		not assigned.unknown	very weakly similar to (92.0) loc_os03g22210 12003.m07624 protein phylloplanin precursor, putative, expressed seq=cds; coord=1:57288052..57288781:-1; parent_gene=GRMZM2G073969	1.28985	GO:0031410//cytoplasmic vesicle	-	-	gi|242035811|ref|XP_002465300.1|/1.24167e-19/hypothetical protein SORBIDRAFT_01g035830 [Sorghum bicolor]
GRMZM2G074358_T01	GRMZM2G074358		RNA.regulation of transcription.NAC domain transcription factor family	moderately similar to ( 227) AT2G17040 | Symbols: anac036 | anac036 (Arabidopsis NAC domain containing protein 36); transcription factor | chr2:7407123-7408120 FORWARDweakly similar to ( 147) NAC67_ORYSA NAC domain-containing protein 67 (ONAC067) - Oryza sativa (Rice)moderately similar to ( 349) loc_os06g51070 12006.m09630 protein NAC domain-containing protein 68, putative, expressed seq=cds; coo…	25.4726	-	GO:0003676//nucleic acid binding	GO:0010468//regulation of gene expression	gi|308080336|ref|NP_001183286.1|/8.11506e-136/uncharacterized protein LOC100501680 [Zea mays]
GRMZM2G075122_T02	GRMZM2G075122		RNA.regulation of transcription.GeBP like	weakly similar to ( 122) AT3G04930 | Symbols: | transcription regulator | chr3:1363029-1364399 FORWARDmoderately similar to ( 256) loc_os03g25430 12003.m07890 protein expressed protein seq=cds; coord=2:213174483..213175593:-1; parent_gene=GRMZM2G075122	1.03537	-	-	-	gi|212274761|ref|NP_001130793.1|/2.19489e-149/uncharacterized protein LOC100191897 [Zea mays]
GRMZM2G075140_T01	GRMZM2G075140		lipid metabolism.FA synthesis and FA elongation.beta ketoacyl CoA synthase	moderately similar to ( 293) AT1G04220 | Symbols: KCS2 | KCS2 (3-KETOACYL-COA SYNTHASE 2); fatty acid elongase | chr1:1119853-1122483 REVERSEmoderately similar to ( 350) loc_os11g37900 12011.m07636 protein fatty acid elongase, putative, expressed seq=cds; coord=4:9739340..9742575:1; parent_gene=GRMZM2G075140	15.1355	GO:0043231//intracellular membrane-bounded organelle	GO:0016747//transferase activity, transferring acyl groups other than amino-acyl groups	GO:0006631//fatty acid metabolic process	gi|125577732|gb|EAZ18954.1|/3.10006e-95/hypothetical protein OsJ_34491 [Oryza sativa Japonica Group]
GRMZM2G075417_T01	GRMZM2G075417		lipid metabolism.FA synthesis and FA elongation.acyl coa ligase	highly similar to ( 571) AT1G65890 | Symbols: AAE12 | AAE12 (ACYL ACTIVATING ENZYME 12); catalytic | chr1:24512598-24514611 REVERSEweakly similar to ( 134) 4CL1_PETCR 4-coumarate--CoA ligase 1 (EC 6.2.1.12) (4CL 1) (4-coumaroyl-CoA synthase 1) - Petroselinum crispum (Parsley) (Petroselinum hortense)highly similar to ( 800) loc_os03g03790 12003.m05911 protein acyl-activating enzyme 11, putative, e…	3.07659	-	GO:0003824//catalytic activity	-	gi|242042375|ref|XP_002468582.1|/0/hypothetical protein SORBIDRAFT_01g048390 [Sorghum bicolor]
GRMZM2G075463_T01	GRMZM2G075463		not assigned.unknown	seq=cds; coord=9:16694350..16694803:-1; parent_gene=GRMZM2G075463	1.2657	-	-	-	gi|168054563|ref|XP_001779700.1|/5.76715e-07/predicted protein [Physcomitrella patens subsp. patens]
GRMZM2G076593_T01	GRMZM2G076593		transport.amino acids	highly similar to ( 636) AT1G77380 | Symbols: AAP3, ATAAP3 | AAP3; amino acid transmembrane transporter | chr1:29075201-29077252 REVERSEhighly similar to ( 796) loc_os12g08090 12012.m04796 protein amino acid transporter, putative, expressed seq=cds; coord=10:11081436..11083714:1; parent_gene=GRMZM2G076593	1.6544	GO:0031224//intrinsic to membrane	-	-	gi|242083004|ref|XP_002441927.1|/0/hypothetical protein SORBIDRAFT_08g004980 [Sorghum bicolor]
GRMZM2G077655_T01	GRMZM2G077655		signalling.receptor kinases.wall associated kinase	moderately similar to ( 465) AT1G21240 | Symbols: WAK3 | WAK3 (wall associated kinase 3); kinase/ protein serine/threonine kinase | chr1:7434303-7436702 FORWARDmoderately similar to ( 215) CRI4_MAIZE Putative receptor protein kinase CRINKLY4 precursor (EC 2.7.11.1) - Zea mays (Maize)highly similar to ( 872) loc_os09g29510 12009.m06102 protein OsWAK80 - OsWAK receptor-like protein kinase, expresse…	5.47264	GO:0031410//cytoplasmic vesicle	GO:0046872//metal ion binding;GO:0004871//signal transducer activity;GO:0004672//protein kinase activity;GO:0032559	GO:0006464//cellular protein modification process	gi|226495085|ref|NP_001147058.1|/0/WAK80 - OsWAK receptor-like protein kinase precursor [Zea mays]
GRMZM2G078097_T01	GRMZM2G078097		amino acid metabolism.degradation.aspartate family.methionine.methionine gamma-lyase	highly similar to ( 503) AT1G64660 | Symbols: ATMGL | ATMGL (ARABIDOPSIS THALIANA METHIONINE GAMMA-LYASE); catalytic/ methionine gamma-lyase | chr1:24028977-24030537 FORWARDhighly similar to ( 660) loc_os10g37340 12010.m06527 protein O-succinylhomoserine sulfhydrylase, putative, expressed seq=cds; coord=5:21875961..21877830:1; parent_gene=GRMZM2G078097	1.7849	GO:0044444//cytoplasmic part	GO:0016765//transferase activity, transferring alkyl or aryl (other than methyl) groups;GO:0048037//cofactor binding;GO:0016846//carbon-sulfur lyase activity	GO:0009087//methionine catabolic process	gi|226507852|ref|NP_001152224.1|/0/O-succinylhomoserine sulfhydrylase [Zea mays]
GRMZM2G078771_T01	GRMZM2G078771		not assigned.unknown	weakly similar to ( 132) AT2G46150 | Symbols: | FUNCTIONS IN: molecular_function unknown; INVOLVED IN: biological_process unknown; LOCATED IN: plasma membrane; EXPRESSED IN: 15 plant structures; EXPRESSED DURING: 7 growth stages; CONTAINS InterPro DOMAIN/s: Harpin-induced 1 (InterPro:IPR010847); BEST Arabidopsis thaliana protein match is: unknown protein (TAIR:AT3G54200.1); Has 137 Blast hits to …	3.01939	-	-	-	gi|226498670|ref|NP_001147295.1|/6.42287e-121/harpin-induced protein [Zea mays]
GRMZM2G079490_T01	GRMZM2G079490		RNA.regulation of transcription.unclassified	moderately similar to ( 361) AT2G03200 | Symbols: | aspartyl protease family protein | chr2:966506-967891 REVERSEhighly similar to ( 523) loc_os04g37550 12004.m08744 protein aspartic proteinase nepenthesin-2 precursor, putative, expressed seq=cds; coord=10:120671025..120672700:1; parent_gene=GRMZM2G079490	1.14286	GO:0043231//intracellular membrane-bounded organelle	GO:0008233//peptidase activity	-	gi|242073260|ref|XP_002446566.1|/3.92843e-154/hypothetical protein SORBIDRAFT_06g018170 [Sorghum bicolor]
GRMZM2G080056_T01	GRMZM2G080056		cell wall.degradation.pectate lyases and polygalacturonases	moderately similar to ( 442) AT3G01270 | Symbols: | pectate lyase family protein | chr3:82892-84720 REVERSEmoderately similar to ( 494) PEL_LILLO Pectate lyase precursor (EC 4.2.2.2) - Lilium longiflorum (Trumpet lily)highly similar to ( 611) loc_os02g12300 12002.m06478 protein pectate lyase precursor, putative, expressed seq=cds; coord=4:230884015..230886011:1; parent_gene=GRMZM2G080056	1.79604	GO:0031410//cytoplasmic vesicle	GO:0016837//carbon-oxygen lyase activity, acting on polysaccharides	-	gi|194706666|gb|ACF87417.1|/0/unknown [Zea mays]
GRMZM2G080355_T01	GRMZM2G080355		not assigned.unknown	very weakly similar to (89.4) loc_os10g25570 12010.m21876 protein expressed protein seq=cds; coord=1:244636779..244637709:1; parent_gene=GRMZM2G080355	1.37143	GO:0009534//chloroplast thylakoid	GO:0046906//tetrapyrrole binding;GO:0001071//nucleic acid binding transcription factor activity	GO:0009642//response to light intensity;GO:0003006//developmental process involved in reproduction;GO:0009791//post-embryonic development	gi|226508142|ref|NP_001145142.1|/1.38774e-43/uncharacterized protein LOC100278372 [Zea mays]
GRMZM2G080839_T01	GRMZM2G080839		misc.nitrilases, *nitrile lyases, berberine bridge enzymes, reticuline oxidases, troponine reductases	moderately similar to ( 434) AT4G20820 | Symbols: | FAD-binding domain-containing protein | chr4:11150160-11151758 FORWARDhighly similar to ( 744) loc_os06g35700 12006.m08107 protein reticuline oxidase precursor, putative, expressed seq=cds; coord=9:77151999..77153846:1; parent_gene=GRMZM2G080839	1.34743	GO:0031410//cytoplasmic vesicle	GO:0030554//adenyl nucleotide binding;GO:0003824//catalytic activity	-	gi|242096106|ref|XP_002438543.1|/0/hypothetical protein SORBIDRAFT_10g021700 [Sorghum bicolor]
GRMZM2G080907_T01	GRMZM2G080907		misc.nitrilases, *nitrile lyases, berberine bridge enzymes, reticuline oxidases, troponine reductases	moderately similar to ( 440) AT5G44410 | Symbols: | FAD-binding domain-containing protein | chr5:17891246-17892853 REVERSEhighly similar to ( 674) loc_os06g35590 12006.m08096 protein reticuline oxidase precursor, putative, expressed seq=cds; coord=9:77179962..77182089:1; parent_gene=GRMZM2G080907	1.44017	-	GO:0030554//adenyl nucleotide binding;GO:0003824//catalytic activity	-	gi|226496241|ref|NP_001148634.1|/0/reticuline oxidase precursor [Zea mays]
GRMZM2G081105_T01	GRMZM2G081105		transport.NDP-sugars at the ER	moderately similar to ( 448) AT1G07290 | Symbols: | nucleotide-sugar transmembrane transporter | chr1:2242284-2244428 REVERSEhighly similar to ( 620) loc_os03g61100 12003.m10994 protein GDP-mannose transporter, putative seq=cds; coord=1:294813960..294817621:-1; parent_gene=GRMZM2G081105	2.0312	GO:0031224//intrinsic to membrane	-	-	gi|226494181|ref|NP_001146151.1|/0/uncharacterized protein LOC100279720 [Zea mays]
GRMZM2G081239_T01	GRMZM2G081239		transport.Major Intrinsic Proteins.NIP	moderately similar to ( 214) AT5G37810 | Symbols: NIP4;1, NLM4 | NIP4;1 (NOD26-LIKE INTRINSIC PROTEIN 4;1); water channel | chr5:15045232-15047807 FORWARDmoderately similar to ( 457) LSI1_ORYSA Silicon transporter LSI1 (Low silicon protein 1) - Oryza sativa (Rice)moderately similar to ( 499) loc_os06g12310 12006.m05948 protein aquaporin NIP4.1, putative, expressed seq=cds; coord=9:4503953..450764…	1.27102	GO:0044420//extracellular matrix part;GO:0031224//intrinsic to membrane	GO:0015103//inorganic anion transmembrane transporter activity	GO:0015698//inorganic anion transport	gi|162460002|ref|NP_001105517.1|/1.94439e-165/aquaporin NIP2-3 [Zea mays]
GRMZM2G081953_T01	GRMZM2G081953		not assigned.unknown	weakly similar to ( 105) AT2G44190 | Symbols: EDE1 | EDE1 (ENDOSPERM DEFECTIVE 1); microtubule binding | chr2:18272346-18274332 FORWARDweakly similar to ( 187) loc_os09g11440 12009.m04406 protein expressed protein seq=cds; coord=1:255088732..255098669:1; parent_gene=GRMZM2G081953	1.17872	-	-	-	gi|242033685|ref|XP_002464237.1|/3.75183e-127/hypothetical protein SORBIDRAFT_01g014750 [Sorghum bicolor]
GRMZM2G082490_T01	GRMZM2G082490		RNA.regulation of transcription.C2C2(Zn) DOF zinc finger family	weakly similar to ( 103) AT2G34140 | Symbols: | Dof-type zinc finger domain-containing protein | chr2:14414188-14414700 REVERSEvery weakly similar to (83.6) MNB1A_MAIZE Dof zinc finger protein MNB1A - Zea mays (Maize)weakly similar to ( 151) loc_os01g55340 12001.m11693 protein expressed protein seq=cds; coord=8:173719258..173720379:1; parent_gene=GRMZM2G082490	2.04858	-	GO:0046914//transition metal ion binding;GO:0003676//nucleic acid binding;GO:0001071//nucleic acid binding transcription factor activity	GO:0010468//regulation of gene expression	gi|316657997|tpg|DAA34015.1|/7.88811e-38/TPA_inf: Dof-type zinc finger protein 12 [Sorghum bicolor]
GRMZM2G082586_T01	GRMZM2G082586		RNA.regulation of transcription.bHLH,Basic Helix-Loop-Helix family	weakly similar to ( 138) AT1G72210 | Symbols: | basic helix-loop-helix (bHLH) family protein (bHLH096) | chr1:27180066-27182268 FORWARDmoderately similar to ( 207) loc_os09g29360 12009.m06087 protein DNA binding protein, putative, expressed seq=cds; coord=7:128707588..128709815:1; parent_gene=GRMZM2G082586	1.68315	GO:0043231//intracellular membrane-bounded organelle	-	-	gi|195604516|gb|ACG24088.1|/7.41485e-100/DNA binding protein [Zea mays]
GRMZM2G082630_T01	GRMZM2G082630		RNA.regulation of transcription.bHLH,Basic Helix-Loop-Helix family	very weakly similar to (80.5) AT3G25710 | Symbols: BHLH32, ATAIG1 | BHLH32 (BASIC HELIX-LOOP-HELIX 32); DNA binding / transcription factor | chr3:9369598-9371096 FORWARDmoderately similar to ( 207) loc_os08g37290 12008.m07715 protein DNA binding protein, putative, expressed seq=cds; coord=1:200412732..200413581:1; parent_gene=GRMZM2G082630	1.06413	GO:0043231//intracellular membrane-bounded organelle	-	GO:0010468//regulation of gene expression	gi|242079519|ref|XP_002444528.1|/8.57685e-78/hypothetical protein SORBIDRAFT_07g023280 [Sorghum bicolor]
GRMZM2G082809_T01	GRMZM2G082809		not assigned.unknown	moderately similar to ( 288) loc_os07g08790 12007.m05335 protein seed specific protein Bn15D14A, putative, expressed seq=cds; coord=2:232987169..232992986:-1; parent_gene=GRMZM2G082809	1.00389	-	-	-	gi|194707142|gb|ACF87655.1|/4.91114e-140/unknown [Zea mays]
GRMZM2G083980_T01	GRMZM2G083980		hormone metabolism.auxin.induced-regulated-responsive-activated	very weakly similar to (99.8) loc_os06g45970 12006.m09125 protein OsSAUR26 - Auxin-responsive SAUR gene family member, expressed seq=cds; coord=9:111066233..111066937:-1; parent_gene=GRMZM2G083980	1.90184	GO:0043231//intracellular membrane-bounded organelle	GO:0005515//protein binding	GO:0009755//hormone-mediated signaling pathway	gi|242093884|ref|XP_002437432.1|/1.58181e-20/hypothetical protein SORBIDRAFT_10g026980 [Sorghum bicolor]
GRMZM2G084264_T01	GRMZM2G084264		RNA.regulation of transcription.AP2/EREBP, APETALA2/Ethylene-responsive element binding protein family	very weakly similar to (87.0) AT1G21910 | Symbols: | AP2 domain-containing transcription factor family protein | chr1:7696655-7697347 FORWARDweakly similar to ( 165) loc_os06g10780 12006.m05795 protein DNA binding protein, putative, expressed seq=cds; coord=6:109899548..109900749:1; parent_gene=GRMZM2G084264	6.37413	-	-	GO:0006350	gi|226496986|ref|NP_001146768.1|/1.37398e-91/uncharacterized protein LOC100280370 [Zea mays]
GRMZM2G084947_T01	GRMZM2G084947		not assigned.unknown	moderately similar to ( 245) loc_os06g36070 12006.m08144 protein expressed protein seq=cds; coord=9:74919301..74920595:1; parent_gene=GRMZM2G084947	1.18327	GO:0043231//intracellular membrane-bounded organelle	-	-	gi|242096136|ref|XP_002438558.1|/7.04968e-89/hypothetical protein SORBIDRAFT_10g021910 [Sorghum bicolor]
GRMZM2G085198_T02	GRMZM2G085198		misc.peroxidases	moderately similar to ( 281) AT1G05260 | Symbols: RCI3, RCI3A | RCI3 (RARE COLD INDUCIBLE GENE 3); peroxidase | chr1:1529827-1531271 FORWARDmoderately similar to ( 286) PER1_ORYSA Peroxidase 1 precursor (EC 1.11.1.7) - Oryza sativa (Rice)highly similar to ( 511) loc_os10g39170 12010.m06688 protein peroxidase 1 precursor, putative, expressed seq=cds; coord=1:83521815..83523818:-1; parent_gene=GRMZ…	2.46169	GO:0043231//intracellular membrane-bounded organelle;GO:0031410//cytoplasmic vesicle	GO:0016209//antioxidant activity;GO:0005506//iron ion binding;GO:0003824//catalytic activity	GO:0006950//response to stress;GO:0008152//metabolic process	gi|223943507|gb|ACN25837.1|/1.43751e-169/unknown [Zea mays]
GRMZM2G085408_T02	GRMZM2G085408		not assigned.unknown	seq=cds; coord=8:151657456..151658797:-1; parent_gene=GRMZM2G085408	1.14183	-	-	-	gi|226506640|ref|NP_001141570.1|/1.01447e-45/uncharacterized protein LOC100273686 [Zea mays]
GRMZM2G085530_T03	GRMZM2G085530		not assigned.unknown	seq=cds; coord=6:107475398..107476454:-1; parent_gene=GRMZM2G085530	1.44971	-	-	-	gi|195608706|gb|ACG26183.1|/4.56203e-24/hypothetical protein [Zea mays]
GRMZM2G086502_T01	GRMZM2G086502		cell.organisation	moderately similar to ( 204) loc_os11g23220 12011.m06296 protein VIIIA, putative, expressed seq=cds; coord=7:29528766..29530595:-1; parent_gene=GRMZM2G086502	2.87002	-	-	-	gi|212276311|ref|NP_001130272.1|/4.43658e-141/uncharacterized protein LOC100191366 [Zea mays]
GRMZM2G087875_T01	GRMZM2G087875		misc.cytochrome P450	moderately similar to ( 357) AT4G37370 | Symbols: CYP81D8 | CYP81D8; electron carrier/ heme binding / iron ion binding / monooxygenase/ oxygen binding | chr4:17569971-17571678 REVERSEmoderately similar to ( 248) F3PH_PETHY Flavonoid 3-monooxygenase (EC 1.14.13.21) (Flavonoid 3-hydroxylase) (Cytochrome P450 75B2) - Petunia hybrida (Petunia)highly similar to ( 523) loc_os03g55240 12003.m10439 prote…	1.13138	GO:0031410//cytoplasmic vesicle	GO:0016491//oxidoreductase activity;GO:0005506//iron ion binding	GO:0008152//metabolic process	gi|195616010|gb|ACG29835.1|/0/cytochrome P450 CYP81A1 [Zea mays]
GRMZM2G088053_T01	GRMZM2G088053		development.unspecified	moderately similar to ( 328) AT1G21890 | Symbols: | nodulin MtN21 family protein | chr1:7682808-7685581 REVERSEmoderately similar to ( 478) loc_os06g10750 12006.m05792 protein nodulin protein, putative, expressed seq=cds; coord=9:8432717..8434846:-1; parent_gene=GRMZM2G088053	1.32764	GO:0044464//cell part	-	-	gi|226510073|ref|NP_001141126.1|/1.43063e-174/uncharacterized protein LOC100273211 [Zea mays]
GRMZM2G088243_T01	GRMZM2G088243		not assigned.unknown	very weakly similar to (87.0) loc_os10g25100 12010.m05460 protein expressed protein seq=cds; coord=5:37255876..37256745:1; parent_gene=GRMZM2G088243	1.32831	-	-	-	gi|226494371|ref|NP_001144171.1|/1.00846e-94/uncharacterized protein LOC100277026 [Zea mays]
GRMZM2G088371_T01	GRMZM2G088371		not assigned.unknown	seq=cds; coord=3:14968364..14968969:-1; parent_gene=GRMZM2G088371	2.52861	-	-	-	gi|195649111|gb|ACG44023.1|/4.41535e-28/hypothetical protein [Zea mays]
GRMZM2G089273_T01	GRMZM2G089273		hormone metabolism.auxin.induced-regulated-responsive-activated	seq=cds; coord=2:9606505..9606807:-1; parent_gene=GRMZM2G089273	20.8611	-	-	-	gi|242074338|ref|XP_002447105.1|/3.75457e-40/hypothetical protein SORBIDRAFT_06g028660 [Sorghum bicolor]
GRMZM2G089357_T01	GRMZM2G089357		not assigned.unknown	very weakly similar to (99.8) AT5G37840 | Symbols: | FUNCTIONS IN: molecular_function unknown; INVOLVED IN: biological_process unknown; LOCATED IN: cellular_component unknown; BEST Arabidopsis thaliana protein match is: PMI2 (plastid movement impaired 2) (TAIR:AT1G66480.1); Has 49 Blast hits to 49 proteins in 8 species: Archae - 0; Bacteria - 0; Metazoa - 0; Fungi - 0; Plants - 49; Viruses - 0; O…	3.15912	-	-	-	gi|242066088|ref|XP_002454333.1|/3.524e-89/hypothetical protein SORBIDRAFT_04g028880 [Sorghum bicolor]
GRMZM2G089493_T01	GRMZM2G089493		transport.sugars	weakly similar to ( 137) loc_os07g37850 12007.m08034 protein expressed protein seq=cds; coord=7:158126216..158127461:-1; parent_gene=GRMZM2G089493	1.38353	GO:0031410//cytoplasmic vesicle	-	-	gi|212274755|ref|NP_001130609.1|/2.74999e-42/uncharacterized protein LOC100191708 precursor [Zea mays]
GRMZM2G090266_T01	GRMZM2G090266		not assigned.unknown	very weakly similar to (89.7) loc_os06g44420 12006.m08970 protein GDU1, putative, expressed seq=cds; coord=9:108510152..108510917:-1; parent_gene=GRMZM2G090266	3.25072	-	-	-	gi|242096574|ref|XP_002438777.1|/2.16354e-29/hypothetical protein SORBIDRAFT_10g026040 [Sorghum bicolor]
GRMZM2G091191_T01	GRMZM2G091191		cell wall.modification	moderately similar to ( 278) AT5G57550 | Symbols: XTR3 | XTR3 (XYLOGLUCAN ENDOTRANSGLYCOSYLASE 3); hydrolase, acting on glycosyl bonds / xyloglucan:xyloglucosyl transferase | chr5:23305055-23306384 REVERSEmoderately similar to ( 275) BRU1_SOYBN Brassinosteroid-regulated protein BRU1 precursor - Glycine max (Soybean)moderately similar to ( 425) loc_os04g51450 12004.m10041 protein brassinosteroid-r…	1.06768	GO:0005576//extracellular region;GO:0031410//cytoplasmic vesicle;GO:0030312//external encapsulating structure	GO:0016798//hydrolase activity, acting on glycosyl bonds;GO:0016758//transferase activity, transferring hexosyl groups	GO:0044042//glucan metabolic process	gi|242077074|ref|XP_002448473.1|/1.15033e-147/hypothetical protein SORBIDRAFT_06g027660 [Sorghum bicolor]
GRMZM2G091338_T01	GRMZM2G091338		protein.postranslational modification.kinase.receptor like cytoplasmatic kinase VII	moderately similar to ( 428) AT5G18610 | Symbols: | protein kinase family protein | chr5:6192736-6195371 FORWARDmoderately similar to ( 228) NORK_PEA Nodulation receptor kinase precursor (EC 2.7.11.1) - Pisum sativum (Garden pea)highly similar to ( 550) loc_os01g57940 12001.m11942 protein protein kinase APK1A, chloroplast precursor, putative, expressed seq=cds; coord=3:189536953..189538986:-1; pa…	1.02704	-	GO:0004713//protein tyrosine kinase activity;GO:0032559	GO:0006464//cellular protein modification process	gi|239046565|ref|NP_001141596.2|/0/uncharacterized protein LOC100273713 [Zea mays]
GRMZM2G091456_T04	GRMZM2G091456		not assigned.unknown	seq=cds; coord=1:29399685..29400552:1; parent_gene=GRMZM2G091456	1.32403	GO:0031224//intrinsic to membrane;GO:0031410//cytoplasmic vesicle	GO:0030554//adenyl nucleotide binding;GO:0004497//monooxygenase activity	GO:0008152//metabolic process	gi|195610112|gb|ACG26886.1|/8.31467e-31/hypothetical protein [Zea mays]
GRMZM2G091540_T01	GRMZM2G091540		hormone metabolism.auxin.synthesis-degradation	moderately similar to ( 415) AT1G51760 | Symbols: IAR3, JR3 | IAR3 (IAA-ALANINE RESISTANT 3); IAA-Ala conjugate hydrolase/ metallopeptidase | chr1:19199562-19201424 FORWARDhighly similar to ( 562) loc_os01g51060 12001.m11287 protein IAA-amino acid hydrolase ILR1-like 4 precursor, putative, expressed seq=cds; coord=3:204579171..204584065:1; parent_gene=GRMZM2G091540	1.06964	GO:0031410//cytoplasmic vesicle	GO:0003824//catalytic activity;GO:0005488//binding	-	gi|259490759|ref|NP_001159338.1|/0/uncharacterized protein LOC100304432 precursor [Zea mays]
GRMZM2G092003_T01	GRMZM2G092003		not assigned.unknown	weakly similar to ( 129) AT1G49330 | Symbols: | hydroxyproline-rich glycoprotein family protein | chr1:18250043-18251038 FORWARDweakly similar to ( 175) loc_os05g47590 12005.m08831 protein conserved hypothetical protein seq=cds; coord=8:63893483..63894955:-1; parent_gene=GRMZM2G092003	2.86078	-	-	-	gi|222632461|gb|EEE64593.1|/2.02225e-42/hypothetical protein OsJ_19445 [Oryza sativa Japonica Group]
GRMZM2G092666_T01	GRMZM2G092666		not assigned.unknown	seq=cds; coord=8:645901..646656:-1; parent_gene=GRMZM2G092666	2.02691	-	-	-	gi|242052687|ref|XP_002455489.1|/1.74347e-31/hypothetical protein SORBIDRAFT_03g011800 [Sorghum bicolor]
GRMZM2G092945_T01	GRMZM2G092945		transport.amino acids	moderately similar to ( 470) AT1G44100 | Symbols: AAP5 | AAP5; amino acid transmembrane transporter/ basic amino acid transmembrane transporter | chr1:16764651-16767223 REVERSEhighly similar to ( 756) loc_os01g65670 12001.m12676 protein amino acid transporter, putative, expressed seq=cds; coord=8:165280615..165286744:1; parent_gene=GRMZM2G092945	3.09284	GO:0031224//intrinsic to membrane	-	-	gi|293332489|ref|NP_001169382.1|/0/uncharacterized protein LOC100383250 [Zea mays]
GRMZM2G093090_T01	GRMZM2G093090		transport.Major Intrinsic Proteins.TIP	weakly similar to ( 172) AT2G25810 | Symbols: TIP4;1 | TIP4;1 (tonoplast intrinsic protein 4;1); water channel | chr2:11012658-11013906 FORWARDmoderately similar to ( 270) TIP43_ORYSA Probable aquaporin TIP4.3 (Tonoplast intrinsic protein 4.3) (OsTIP4.3) - Oryza sativa (Rice)moderately similar to ( 270) loc_os01g13120 12001.m07922 protein aquaporin TIP4.1, putative, expressed seq=cds; coord=3:184…	1.44834	GO:0016020//membrane	-	GO:0051234//establishment of localization	gi|162458108|ref|NP_001105641.1|/1.44692e-86/aquaporin TIP4-4 [Zea mays]
GRMZM2G093125_T01	GRMZM2G093125		secondary metabolism.N misc.alkaloid-like	moderately similar to ( 493) AT2G20340 | Symbols: | tyrosine decarboxylase, putative | chr2:8779804-8782490 FORWARDhighly similar to ( 510) TYDC2_PETCR Tyrosine decarboxylase 2 (EC 4.1.1.25) - Petroselinum crispum (Parsley) (Petroselinum hortense)highly similar to ( 803) loc_os01g56380 12001.m11794 protein tyrosine/DOPA decarboxylase 2, putative, expressed seq=cds; coord=1:17855665..17857563:1; p…	6.55622	-	GO:0048037//cofactor binding;GO:0016830//carbon-carbon lyase activity	GO:0043436	gi|226528393|ref|NP_001152297.1|/0/LOC100285936 [Zea mays]
GRMZM2G093418_T01	GRMZM2G093418		development.late embryogenesis abundant	very weakly similar to (96.7) AT2G46150 | Symbols: | FUNCTIONS IN: molecular_function unknown; INVOLVED IN: biological_process unknown; LOCATED IN: plasma membrane; EXPRESSED IN: 15 plant structures; EXPRESSED DURING: 7 growth stages; CONTAINS InterPro DOMAIN/s: Harpin-induced 1 (InterPro:IPR010847); BEST Arabidopsis thaliana protein match is: unknown protein (TAIR:AT3G54200.1); Has 137 Blast hit…	7.11013	-	-	-	gi|226493874|ref|NP_001147657.1|/8.54347e-79/harpin-induced protein [Zea mays]
GRMZM2G093632_T01	GRMZM2G093632		misc.beta 1,3 glucan hydrolases	weakly similar to ( 124) AT1G79480 | Symbols: | LOCATED IN: endomembrane system; CONTAINS InterPro DOMAIN/s: X8 (InterPro:IPR012946); BEST Arabidopsis thaliana protein match is: glycosyl hydrolase family protein 17 (TAIR:AT5G67460.1); Has 4247 Blast hits to 3762 proteins in 375 species: Archae - 10; Bacteria - 432; Metazoa - 1406; Fungi - 619; Plants - 1140; Viruses - 87; Other Eukaryotes - 553 (…	1.99672	-	GO:0003824//catalytic activity	-	gi|226505610|ref|NP_001141530.1|/1.94798e-97/uncharacterized protein LOC100273642 precursor [Zea mays]
GRMZM2G093838_T01	GRMZM2G093838		RNA.regulation of transcription.unclassified	weakly similar to ( 166) loc_os09g25420 12009.m05694 protein zinc finger, C2H2 type family protein, expressed seq=cds; coord=7:117033359..117035426:-1; parent_gene=GRMZM2G093838	2.44159	-	GO:0005488//binding	-	gi|293332065|ref|NP_001168509.1|/0/uncharacterized protein LOC100382288 [Zea mays]
GRMZM2G094051_T02	GRMZM2G094051		not assigned.unknown	seq=cds; coord=10:141350790..141351635:1; parent_gene=GRMZM2G094051	1.2838	GO:0015934//large ribosomal subunit;GO:0009536//plastid	GO:0005198//structural molecule activity	GO:0010467//gene expression	gi|226498196|ref|NP_001148262.1|/3.09539e-17/60S ribosomal protein L7-2 [Zea mays]
GRMZM2G094165_T05	GRMZM2G094165		PS.carbon concentrating mechanism.C4	moderately similar to ( 243) AT5G14740 | Symbols: CA2, CA18, BETA CA2 | CA2 (CARBONIC ANHYDRASE 2); carbonate dehydratase/ zinc ion binding | chr5:4758257-4762315 FORWARDmoderately similar to ( 337) CAHC_HORVU Carbonic anhydrase, chloroplast precursor (EC 4.2.1.1) (Carbonate dehydratase) - Hordeum vulgare (Barley)moderately similar to ( 340) loc_os01g45274 12001.m150428 protein carbonic anhydrase…	1.02247	GO:0009532//plastid stroma	GO:0046914//transition metal ion binding;GO:0016836//hydro-lyase activity	-	gi|293335117|ref|NP_001168699.1|/3.5946e-115/uncharacterized protein LOC100382491 [Zea mays]
GRMZM2G094850_T02	GRMZM2G094850		not assigned.unknown	weakly similar to ( 171) AT1G54385 | Symbols: | binding | chr1:20301289-20303048 REVERSEmoderately similar to ( 375) loc_os12g42960 12012.m08074 protein expressed protein seq=cds; coord=1:177051188..177054601:-1; parent_gene=GRMZM2G094850	1.35426	-	-	-	gi|293333154|ref|NP_001169823.1|/0/uncharacterized protein LOC100383715 [Zea mays]
GRMZM2G094860_T01	GRMZM2G094860		not assigned.unknown	moderately similar to ( 353) AT4G00910 | Symbols: | unknown protein | chr4:389370-391287 REVERSEhighly similar to ( 578) loc_os04g47930 12004.m09733 protein ALMT1, putative, expressed seq=cds; coord=10:137281069..137283152:1; parent_gene=GRMZM2G094860	2.828	-	-	-	gi|242076836|ref|XP_002448354.1|/0/hypothetical protein SORBIDRAFT_06g025640 [Sorghum bicolor]
GRMZM2G094990_T01	GRMZM2G094990		cell wall.modification	moderately similar to ( 205) AT1G65680 | Symbols: ATEXPB2, EXPB2, ATHEXP BETA 1.4 | ATEXPB2 (ARABIDOPSIS THALIANA EXPANSIN B2) | chr1:24427266-24428399 FORWARDmoderately similar to ( 373) EXPB3_ORYSA Expansin-B3 precursor (OsEXPB3) (Beta-expansin-3) (OsaEXPb1.10) - Oryza sativa (Rice)moderately similar to ( 373) loc_os10g40720 12010.m06840 protein beta-expansin 1a precursor, putative, expressed s…	2.38028	GO:0031410//cytoplasmic vesicle	-	GO:0000003//reproduction	gi|226499066|ref|NP_001151162.1|/1.14606e-145/beta-expansin 1a precursor [Zea mays]
GRMZM2G095895_T01	GRMZM2G095895		not assigned.unknown	seq=cds; coord=6:119200177..119200897:1; parent_gene=GRMZM2G095895	2.39096	-	-	-	-
GRMZM2G095904_T01	GRMZM2G095904		RNA.regulation of transcription.MYB domain transcription factor family	moderately similar to ( 232) AT3G23250 | Symbols: MYB15, ATY19, ATMYB15 | MYB15 (MYB DOMAIN PROTEIN 15); DNA binding / transcription factor | chr3:8309742-8310624 FORWARDmoderately similar to ( 285) MYB4_ORYSA Myb-related protein Myb4 (OsMyb4) (Transcription factor RLTR1) - Oryza sativa (Rice)moderately similar to ( 322) loc_os02g41510 12002.m09187 protein myb-related protein Myb4, putative, expr…	1.96052	-	-	-	gi|226504756|ref|NP_001152064.1|/4.56737e-92/myb-related protein Myb4 [Zea mays]
GRMZM2G096169_T01	GRMZM2G096169		development.unspecified	highly similar to ( 568) AT4G25360 | Symbols: | INVOLVED IN: biological_process unknown; EXPRESSED IN: 22 plant structures; EXPRESSED DURING: 13 growth stages; CONTAINS InterPro DOMAIN/s: Protein of unknown function DUF231, plant (InterPro:IPR004253); BEST Arabidopsis thaliana protein match is: YLS7 (TAIR:AT5G51640.1); Has 699 Blast hits to 688 proteins in 15 species: Archae - 0; Bacteria - 0; Me…	1.10326	GO:0043231//intracellular membrane-bounded organelle	-	-	gi|293333043|ref|NP_001168473.1|/0/uncharacterized protein LOC100382249 [Zea mays]
GRMZM2G096577_T01	GRMZM2G096577		not assigned.unknown	seq=cds; coord=2:5303611..5304697:1; parent_gene=GRMZM2G096577	3.54053	-	-	-	-
GRMZM2G097469_T01	GRMZM2G097469		lipid metabolism.FA synthesis and FA elongation.beta ketoacyl CoA synthase	very weakly similar to (98.6) AT1G04220 | Symbols: KCS2 | KCS2 (3-KETOACYL-COA SYNTHASE 2); fatty acid elongase | chr1:1119853-1122483 REVERSEweakly similar to ( 112) loc_os11g37900 12011.m07636 protein fatty acid elongase, putative, expressed seq=cds; coord=4:9751997..9752755:1; parent_gene=GRMZM2G097469	6.05668	GO:0044464//cell part	GO:0004312//fatty acid synthase activity	GO:0006950//response to stress;GO:0006631//fatty acid metabolic process	gi|242069223|ref|XP_002449888.1|/8.7983e-47/hypothetical protein SORBIDRAFT_05g025040 [Sorghum bicolor]
GRMZM2G099408_T01	GRMZM2G099408		RNA.regulation of transcription.MADS box transcription factor family	very weakly similar to (98.6) AT5G26630 | Symbols: | MADS-box protein (AGL35) | chr5:9350815-9351471 FORWARDweakly similar to ( 138) loc_os01g18440 12001.m08384 protein MADS-box transcription factor PHERES2, putative seq=cds; coord=4:6438177..6439050:1; parent_gene=GRMZM2G099408	1.09578	GO:0043231//intracellular membrane-bounded organelle	GO:0003677//DNA binding;GO:0001071//nucleic acid binding transcription factor activity	GO:0010468//regulation of gene expression;GO:0006351//transcription, DNA-dependent	gi|242071617|ref|XP_002451085.1|/2.75596e-82/hypothetical protein SORBIDRAFT_05g023895 [Sorghum bicolor]
GRMZM2G100372_T01	GRMZM2G100372		not assigned.unknown	seq=cds; coord=2:183926414..183927687:-1; parent_gene=GRMZM2G100372	2.25521	-	-	-	gi|212275127|ref|NP_001130807.1|/5.73704e-144/uncharacterized protein LOC100191911 [Zea mays]
GRMZM2G100776_T01	GRMZM2G100776		not assigned.unknown	moderately similar to ( 266) JI60_HORVU 60 kDa jasmonate-induced protein (EC 3.2.2.22) (rRNA N-glycosidase) - Hordeum vulgare (Barley)very weakly similar to (89.0) loc_os11g06630 12011.m04860 protein ribosome inactivating protein 1, putative seq=cds; coord=8:48630170..48632250:1; parent_gene=GRMZM2G100776	5.08388	-	-	-	gi|957249|gb|AAB33361.1|/7.23307e-70/JIP60=60 kda jasmonate-induced protein [Hordeum vulgare=barley, cv. Bonus, Peptide, 560 aa]
GRMZM2G101422_T01	GRMZM2G101422		not assigned.unknown	weakly similar to ( 130) loc_os08g35560 12008.m07545 protein expressed protein seq=cds; coord=1:208316161..208316652:-1; parent_gene=GRMZM2G101422	5.4504	GO:0031410//cytoplasmic vesicle	-	-	gi|242079403|ref|XP_002444470.1|/1.35636e-48/hypothetical protein SORBIDRAFT_07g022340 [Sorghum bicolor]
GRMZM2G102662_T01	GRMZM2G102662		misc.cytochrome P450	moderately similar to ( 320) AT1G13080 | Symbols: CYP71B2 | CYP71B2 (CYTOCHROME P450 71B2); electron carrier/ heme binding / iron ion binding / monooxygenase/ oxygen binding | chr1:4459493-4460807 FORWARDmoderately similar to ( 349) C71A9_SOYBN Cytochrome P450 71A9 (EC 1.14.-.-) (P450 CP1) - Glycine max (Soybean)highly similar to ( 838) loc_os12g16720 12012.m05630 protein cytochrome P450 71A1, pu…	2.91808	GO:0044464//cell part	GO:0016491//oxidoreductase activity;GO:0005506//iron ion binding	GO:0008152//metabolic process	gi|242089737|ref|XP_002440701.1|/0/hypothetical protein SORBIDRAFT_09g005370 [Sorghum bicolor]
GRMZM2G102888_T01	GRMZM2G102888		not assigned.unknown	seq=cds; coord=6:106444088..106444634:-1; parent_gene=GRMZM2G102888	1.05051	-	-	-	gi|226501240|ref|NP_001144878.1|/5.451e-45/uncharacterized protein LOC100277977 [Zea mays]
GRMZM2G103668_T01	GRMZM2G103668		stress.biotic	moderately similar to ( 262) AT3G12500 | Symbols: ATHCHIB, PR3, PR-3, CHI-B, B-CHI | ATHCHIB (ARABIDOPSIS THALIANA BASIC CHITINASE); chitinase | chr3:3962501-3963945 REVERSEmoderately similar to ( 279) CHIQ_TOBAC Acidic endochitinase Q precursor (EC 3.2.1.14) (Pathogenesis-related protein Q) (PR-Q) - Nicotiana tabacum (Common tobacco)moderately similar to ( 364) loc_os10g39680 12010.m06737 protei…	1.82615	GO:0005576//extracellular region;GO:0031410//cytoplasmic vesicle	GO:0004553//hydrolase activity, hydrolyzing O-glycosyl compounds	GO:0006950//response to stress;GO:0006026	gi|125532825|gb|EAY79390.1|/2.44093e-103/hypothetical protein OsI_34517 [Oryza sativa Indica Group]
GRMZM2G103937_T05	GRMZM2G103937		misc.GDSL-motif lipase	weakly similar to ( 101) AT2G04570 | Symbols: | GDSL-motif lipase/hydrolase family protein | chr2:1594747-1596129 FORWARDweakly similar to ( 173) loc_os02g09620 12002.m06259 protein anther-specific proline-rich protein APG, putative, expressed seq=cds; coord=5:99928401..99929599:1; parent_gene=GRMZM2G103937	1.21891	GO:0031410//cytoplasmic vesicle	GO:0016787//hydrolase activity	GO:0044238//primary metabolic process	gi|242060812|ref|XP_002451695.1|/1.25053e-104/hypothetical protein SORBIDRAFT_04g006070 [Sorghum bicolor]
GRMZM2G105330_T01	GRMZM2G105330		lipid metabolism.FA synthesis and FA elongation.acyl coa ligase	highly similar to ( 718) AT5G16370 | Symbols: AAE5 | AAE5 (ACYL ACTIVATING ENZYME 5); catalytic | chr5:5356823-5358481 REVERSEweakly similar to ( 177) 4CL1_TOBAC 4-coumarate--CoA ligase 1 (EC 6.2.1.12) (4CL 1) (4-coumaroyl-CoA synthase 1) - Nicotiana tabacum (Common tobacco)highly similar to ( 995) loc_os04g57850 12004.m10669 protein AMP-binding protein, putative, expressed seq=cds; coord=2:19185…	3.46556	-	GO:0016405//CoA-ligase activity	-	gi|242077652|ref|XP_002448762.1|/0/hypothetical protein SORBIDRAFT_06g032750 [Sorghum bicolor]
GRMZM2G105417_T01	GRMZM2G105417		not assigned.unknown	very weakly similar to (99.4) loc_os02g36000 12002.m08687 protein conserved hypothetical protein seq=cds; coord=5:175606548..175607402:1; parent_gene=GRMZM2G105417	4.20395	-	-	-	gi|242062052|ref|XP_002452315.1|/7.00657e-49/hypothetical protein SORBIDRAFT_04g023570 [Sorghum bicolor]
GRMZM2G106026_T01	GRMZM2G106026		RNA.regulation of transcription.C2H2 zinc finger family	very weakly similar to (97.8) AT5G04340 | Symbols: C2H2, CZF2, ZAT6 | ZAT6 (ZINC FINGER OF ARABIDOPSIS THALIANA 6); nucleic acid binding / transcription factor/ zinc ion binding | chr5:1216321-1217037 REVERSEvery weakly similar to (92.4) ZFP1_WHEAT Zinc-finger protein 1 (WZF1) - Triticum aestivum (Wheat)weakly similar to ( 197) loc_os03g32230 12003.m08467 protein zinc-finger protein 1, putative, …	3.86338	-	-	-	gi|242035391|ref|XP_002465090.1|/4.94962e-64/hypothetical protein SORBIDRAFT_01g031900 [Sorghum bicolor]
GRMZM2G107560_T01	GRMZM2G107560		RNA.regulation of transcription.bHLH,Basic Helix-Loop-Helix family	very weakly similar to (81.3) AT1G32640 | Symbols: ATMYC2, RD22BP1, JAI1, JIN1, MYC2, ZBF1 | MYC2; DNA binding / transcription activator/ transcription factor | chr1:11799042-11800913 REVERSEmoderately similar to ( 204) loc_os09g34330 12009.m06482 protein transcription factor AtMYC2, putative seq=cds; coord=2:193882051..193882939:-1; parent_gene=GRMZM2G107560	1.07729	-	-	-	gi|242049872|ref|XP_002462680.1|/1.50806e-75/hypothetical protein SORBIDRAFT_02g030120 [Sorghum bicolor]
GRMZM2G107838_T01	GRMZM2G107838		misc.acid and other phosphatases	moderately similar to ( 273) AT5G03080 | Symbols: | phosphatidic acid phosphatase-related / PAP2-related | chr5:721976-722656 FORWARDmoderately similar to ( 360) loc_os03g17940 12003.m07219 protein dolichyldiphosphatase 1, putative, expressed seq=cds; coord=1:44349622..44352638:-1; parent_gene=GRMZM2G107838	1.02664	GO:0044464//cell part	GO:0003824//catalytic activity	-	gi|195654141|gb|ACG46538.1|/2.97988e-111/dolichyldiphosphatase 1 [Zea mays]
GRMZM2G108819_T01	GRMZM2G108819		not assigned.unknown	seq=cds; coord=1:284219914..284220644:1; parent_gene=GRMZM2G108819	1.04811	-	-	-	gi|226506358|ref|NP_001142905.1|/2.19983e-34/uncharacterized protein LOC100275336 [Zea mays]
GRMZM2G109142_T01	GRMZM2G109142		not assigned.unknown	weakly similar to ( 151) AT1G48320 | Symbols: | thioesterase family protein | chr1:17855024-17855577 REVERSEweakly similar to ( 194) loc_os05g04660 12005.m04997 protein expressed protein seq=cds; coord=10:87159918..87161126:-1; parent_gene=GRMZM2G109142	1.20467	-	-	-	gi|226490999|ref|NP_001144798.1|/2.55831e-81/uncharacterized protein LOC100277871 [Zea mays]
GRMZM2G109262_T01	GRMZM2G109262		Biodegradation of Xenobiotics.lactoylglutathione lyase	very weakly similar to (90.9) AT1G80160 | Symbols: | lactoylglutathione lyase family protein / glyoxalase I family protein | chr1:30151280-30151930 FORWARDweakly similar to ( 137) loc_os04g45590 12004.m09512 protein lactoylglutathione lyase, putative, expressed seq=cds; coord=2:22194113..22195252:-1; parent_gene=GRMZM2G109262	3.91436	-	-	-	gi|242073854|ref|XP_002446863.1|/1.61892e-71/hypothetical protein SORBIDRAFT_06g023890 [Sorghum bicolor]
GRMZM2G109848_T01	GRMZM2G109848		not assigned.unknown	seq=cds; coord=9:72853387..72855492:1; parent_gene=GRMZM2G109848	1.36718	GO:0043231//intracellular membrane-bounded organelle	-	-	gi|94502598|ref|YP_588329.1|/7.17786e-42/hypothetical protein ZeamMp066 [Zea mays subsp. mays]
GRMZM2G110395_T01	GRMZM2G110395		not assigned.unknown	moderately similar to ( 366) AT5G11730 | Symbols: | unknown protein | chr5:3780963-3782473 FORWARDmoderately similar to ( 463) loc_os12g43880 12012.m08160 protein expressed protein seq=cds; coord=3:92980359..92982140:1; parent_gene=GRMZM2G110395	3.43266	GO:0044464//cell part	GO:0008194//UDP-glycosyltransferase activity	-	gi|242084366|ref|XP_002442608.1|/2.80875e-152/hypothetical protein SORBIDRAFT_08g022900 [Sorghum bicolor]
GRMZM2G110858_T01	GRMZM2G110858		not assigned.unknown	very weakly similar to (90.1) loc_os01g34470 12001.m09752 protein hypothetical protein seq=cds; coord=3:228937922..228940403:1; parent_gene=GRMZM2G110858	1.47624	-	-	-	gi|219363263|ref|NP_001136574.1|/7.28155e-115/uncharacterized protein LOC100216696 [Zea mays]
GRMZM2G110878_T01	GRMZM2G110878		not assigned.unknown	very weakly similar to (83.2) loc_os01g34470 12001.m09752 protein hypothetical protein seq=cds; coord=3:228900019..228902062:1; parent_gene=GRMZM2G110878	1.57778	-	-	-	gi|212275290|ref|NP_001130626.1|/3.63445e-124/uncharacterized protein LOC100191725 [Zea mays]
GRMZM2G111269_T01	GRMZM2G111269		protein.postranslational modification	highly similar to ( 573) AT3G22750 | Symbols: | protein kinase, putative | chr3:8037364-8039096 REVERSEvery weakly similar to (94.0) NORK_PEA Nodulation receptor kinase precursor (EC 2.7.11.1) - Pisum sativum (Garden pea)highly similar to ( 738) loc_os03g43760 12003.m09416 protein ATP binding protein, putative, expressed seq=cds; coord=1:252926380..252931075:1; parent_gene=GRMZM2G111269	1.21537	-	GO:0004713//protein tyrosine kinase activity;GO:0032559	GO:0006464//cellular protein modification process	gi|226533246|ref|NP_001142326.1|/0/uncharacterized protein LOC100274496 [Zea mays]
GRMZM2G111657_T01	GRMZM2G111657		cell.vesicle transport	moderately similar to ( 387) AT3G29400 | Symbols: ATEXO70E1 | ATEXO70E1 (exocyst subunit EXO70 family protein E1); protein binding | chr3:11297339-11299315 REVERSEhighly similar to ( 857) loc_os01g55799 12001.m150723 protein protein binding protein, putative, expressed seq=cds; coord=3:194800830..194803994:-1; parent_gene=GRMZM2G111657	1.42059	GO:0043234//protein complex	-	GO:0016192//vesicle-mediated transport	gi|226492439|ref|NP_001148051.1|/0/protein binding protein [Zea mays]
GRMZM2G111715_T01	GRMZM2G111715		not assigned.unknown	seq=cds; coord=2:67911371..67912469:-1; parent_gene=GRMZM2G111715	1.14834	-	-	-	gi|308081206|ref|NP_001183545.1|/3.20121e-16/uncharacterized protein LOC100502104 [Zea mays]
GRMZM2G112039_T01	GRMZM2G112039		transport.peptides and oligopeptides	moderately similar to ( 320) AT1G33440 | Symbols: | proton-dependent oligopeptide transport (POT) family protein | chr1:12127712-12130327 REVERSEmoderately similar to ( 442) loc_os04g36040 12004.m08693 protein peptide transporter PTR2, putative, expressed seq=cds; coord=2:47604333..47608510:1; parent_gene=GRMZM2G112039	1.20876	GO:0044464//cell part	-	-	gi|242075910|ref|XP_002447891.1|/0/hypothetical protein SORBIDRAFT_06g017470 [Sorghum bicolor]
GRMZM2G112628_T01	GRMZM2G112628		not assigned.unknown	seq=cds; coord=4:228228118..228228457:1; parent_gene=GRMZM2G112628	2.8168	-	-	-	gi|226499190|ref|NP_001144533.1|/2.20438e-32/uncharacterized protein LOC100277529 [Zea mays]
GRMZM2G115792_T01	GRMZM2G115792		not assigned.unknown	seq=cds; coord=4:214782528..214783532:-1; parent_gene=GRMZM2G115792	1.33413	-	-	-	gi|259489926|ref|NP_001158930.1|/6.73544e-70/uncharacterized protein LOC100303833 [Zea mays]
GRMZM2G116238_T02	GRMZM2G116238		not assigned.unknown	weakly similar to ( 155) AT5G59790 | Symbols: | unknown protein | chr5:24090950-24092804 FORWARDweakly similar to ( 166) loc_os01g74370 12001.m13463 protein expressed protein seq=cds; coord=8:109833966..109835493:-1; parent_gene=GRMZM2G116238	3.84677	-	-	-	gi|293332147|ref|NP_001168626.1|/0/uncharacterized protein LOC100382412 [Zea mays]
GRMZM2G116823_T01	GRMZM2G116823		misc.peroxidases	moderately similar to ( 296) AT5G06720 | Symbols: | peroxidase, putative | chr5:2077567-2078857 REVERSEmoderately similar to ( 260) PERX_TOBAC Lignin-forming anionic peroxidase precursor (EC 1.11.1.7) (TOPA) - Nicotiana tabacum (Common tobacco)moderately similar to ( 402) loc_os03g13180 12003.m06764 protein peroxidase 54 precursor, putative, expressed seq=cds; coord=1:31206890..31208507:1; parent…	2.14528	GO:0031410//cytoplasmic vesicle	GO:0016209//antioxidant activity;GO:0005506//iron ion binding;GO:0003824//catalytic activity	GO:0006950//response to stress;GO:0008152//metabolic process	gi|242041633|ref|XP_002468211.1|/1.2871e-140/hypothetical protein SORBIDRAFT_01g041790 [Sorghum bicolor]
GRMZM2G117113_T01	GRMZM2G117113		not assigned.unknown	very weakly similar to (90.5) AT3G49601 | Symbols: | FUNCTIONS IN: molecular_function unknown; INVOLVED IN: biological_process unknown; LOCATED IN: cellular_component unknown; CONTAINS InterPro DOMAIN/s: mRNA splicing factor, Cwf21 (InterPro:IPR013170); BEST Arabidopsis thaliana protein match is: unknown protein (TAIR:AT4G37820.1); Has 58354 Blast hits to 32469 proteins in 1203 species: Archae - …	2.94681	-	-	-	gi|226496427|ref|NP_001143506.1|/3.08945e-39/uncharacterized protein LOC100276189 [Zea mays]
GRMZM2G117961_T01	GRMZM2G117961		RNA.regulation of transcription.MADS box transcription factor family	weakly similar to ( 199) AT1G71692 | Symbols: AGL12, XAL1 | AGL12 (AGAMOUS-LIKE 12); transcription factor | chr1:26952903-26954939 REVERSEmoderately similar to ( 369) MAD26_ORYSA MADS-box transcription factor 26 (OsMADS26) (FDRMADS3) (RMADS220) - Oryza sativa (Rice)moderately similar to ( 369) loc_os08g02070 12008.m04353 protein MADS-box transcription factor 26, putative, expressed seq=cds; coord…	1.02704	GO:0043231//intracellular membrane-bounded organelle	GO:0003677//DNA binding;GO:0001071//nucleic acid binding transcription factor activity	GO:0010468//regulation of gene expression;GO:0006351//transcription, DNA-dependent	gi|242077951|ref|XP_002443744.1|/3.1046e-107/hypothetical protein SORBIDRAFT_07g001250 [Sorghum bicolor]
GRMZM2G118619_T01	GRMZM2G118619		not assigned.unknown	weakly similar to ( 189) AT2G03820 | Symbols: | nonsense-mediated mRNA decay NMD3 family protein | chr2:1165149-1166699 REVERSEmoderately similar to ( 271) loc_os10g42320 12010.m06988 protein nonsense-mediated mRNA decay protein 3, putative, expressed seq=cds; coord=8:157295026..157296818:1; parent_gene=GRMZM2G118619	1.06828	-	-	-	gi|212724002|ref|NP_001132875.1|/3.12301e-72/uncharacterized protein LOC100194368 [Zea mays]
GRMZM2G120016_T01	GRMZM2G120016		misc.UDP glucosyl and glucoronyl transferases	weakly similar to ( 171) AT4G01070 | Symbols: GT72B1, UGT72B1 | GT72B1; UDP-glucosyltransferase/ UDP-glycosyltransferase/ transferase, transferring glycosyl groups | chr4:461858-463300 REVERSEhighly similar to ( 565) CZOG_SORBI Putative cis-zeatin O-glucosyltransferase (EC 2.4.1.215) - Sorghum bicolor (Sorghum) (Sorghum vulgare)highly similar to ( 545) loc_os04g46990 12004.m09645 protein cis-zeat…	5.78567	-	GO:0016758//transferase activity, transferring hexosyl groups	-	gi|226503147|ref|NP_001141165.1|/0/uncharacterized protein LOC100273251 [Zea mays]
GRMZM2G121115_T01	GRMZM2G121115		protein.degradation.ubiquitin.E3.BTB/POZ Cullin3.BTB/POZ	weakly similar to ( 158) AT5G63160 | Symbols: BT1 | BT1 (BTB AND TAZ DOMAIN PROTEIN 1); protein binding / transcription regulator | chr5:25333485-25335399 REVERSEmoderately similar to ( 317) loc_os04g40630 12004.m101558 protein protein binding protein, putative, expressed seq=cds; coord=5:180900156..180903528:1; parent_gene=GRMZM2G121115	1.14696	GO:0043231//intracellular membrane-bounded organelle	GO:0046914//transition metal ion binding;GO:0004468//lysine N-acetyltransferase activity;GO:0008134//transcription factor binding	GO:0006351//transcription, DNA-dependent	gi|226492573|ref|NP_001147219.1|/9.08481e-164/protein binding protein [Zea mays]
GRMZM2G121495_T02	GRMZM2G121495		misc.gluco-, galacto- and mannosidases.beta-galactosidase	nearly identical (1009) AT3G13750 | Symbols: BGAL1 | BGAL1 (Beta galactosidase 1); beta-galactosidase/ catalytic/ cation binding / heme binding / peroxidase/ sugar binding | chr3:4511192-4515756 FORWARDnearly identical (1066) BGAL_ASPOF Beta-galactosidase precursor (EC 3.2.1.23) (Lactase) - Asparagus officinalis (Garden asparagus)nearly identical (1283) loc_os02g12730 12002.m33618 protein beta-ga…	1.09233	GO:0005576//extracellular region;GO:0031410//cytoplasmic vesicle	GO:0043167//ion binding;GO:0015925	GO:0044238//primary metabolic process	gi|242064502|ref|XP_002453540.1|/0/hypothetical protein SORBIDRAFT_04g007660 [Sorghum bicolor]
GRMZM2G122447_T01	GRMZM2G122447		not assigned.unknown	weakly similar to ( 121) loc_os06g41450 12006.m08677 protein VQ motif family protein, expressed seq=cds; coord=9:100304257..100305904:1; parent_gene=GRMZM2G122447	2.32455	-	-	-	gi|259490541|ref|NP_001158900.1|/9.96344e-86/uncharacterized protein LOC100303794 [Zea mays]
GRMZM2G122654_T01	GRMZM2G122654		misc.cytochrome P450	moderately similar to ( 291) AT5G25120 | Symbols: CYP71B11 | CYP71B11; electron carrier/ heme binding / iron ion binding / monooxygenase/ oxygen binding | chr5:8662851-8664432 FORWARDmoderately similar to ( 356) C71DA_SOYBN Cytochrome P450 71D10 (EC 1.14.-.-) - Glycine max (Soybean)highly similar to ( 526) loc_os10g30390 12010.m05901 protein cytochrome P450 71D7, putative, expressed seq=cds; coor…	2.43531	GO:0031410//cytoplasmic vesicle	GO:0016491//oxidoreductase activity;GO:0005506//iron ion binding	GO:0008152//metabolic process	gi|226499698|ref|NP_001142188.1|/0/uncharacterized protein LOC100274356 [Zea mays]
GRMZM2G124290_T01	GRMZM2G124290		not assigned.unknown	very weakly similar to (99.0) loc_os03g57520 12003.m10670 protein VQ motif family protein, expressed seq=cds; coord=5:4619463..4620282:-1; parent_gene=GRMZM2G124290	1.63512	-	-	-	gi|242037869|ref|XP_002466329.1|/4.43558e-23/hypothetical protein SORBIDRAFT_01g005740 [Sorghum bicolor]
GRMZM2G124667_T01	GRMZM2G124667		misc.plastocyanin-like	weakly similar to ( 108) AT1G48940 | Symbols: | plastocyanin-like domain-containing protein | chr1:18105808-18106422 REVERSEweakly similar to ( 126) loc_os06g17730 12006.m06485 protein blue copper protein precursor, putative, expressed seq=cds; coord=4:164089536..164090676:-1; parent_gene=GRMZM2G124667	4.84672	GO:0031410//cytoplasmic vesicle	GO:0046914//transition metal ion binding	-	gi|195635083|gb|ACG37010.1|/2.57965e-58/uclacyanin-2 precursor [Zea mays]
GRMZM2G124785_T01	GRMZM2G124785		metal handling.binding, chelation and storage	moderately similar to ( 302) AT1G56430 | Symbols: ATNAS4, NAS4 | NAS4 (NICOTIANAMINE SYNTHASE 4); nicotianamine synthase | chr1:21137023-21137997 FORWARDmoderately similar to ( 483) NAS2_ORYSA Nicotianamine synthase 2 (EC 2.5.1.43) (S-adenosyl-L-methionine:S-adenosyl-L-methionine:S-adenosyl-methionine 3-amino-3-carboxypropyltransferase 2) (OsNAS2) - Oryza sativa (Rice)moderately similar to ( 488)…	1.17223	-	GO:0016765//transferase activity, transferring alkyl or aryl (other than methyl) groups	GO:0018130;GO:0000041//transition metal ion transport	gi|162460235|ref|NP_001104862.1|/0/nicotianamine synthase2 [Zea mays]
GRMZM2G125023_T01	GRMZM2G125023		transport.Major Intrinsic Proteins.TIP	moderately similar to ( 352) AT4G17340 | Symbols: TIP2;2, DELTA-TIP2 | TIP2;2 (TONOPLAST INTRINSIC PROTEIN 2;2); water channel | chr4:9699318-9700250 FORWARDmoderately similar to ( 412) TIP21_ORYSA Probable aquaporin TIP2.1 (Tonoplast intrinsic protein 2.1) (OsTIP2.1) - Oryza sativa (Rice)moderately similar to ( 412) loc_os02g44080 12002.m09443 protein aquaporin TIP2.1, putative, expressed seq=cd…	4.8937	GO:0031090//organelle membrane;GO:0043231//intracellular membrane-bounded organelle;GO:0031224//intrinsic to membrane;GO:0031410//cytoplasmic vesicle	-	GO:0006810//transport	gi|195649105|gb|ACG44020.1|/1.23951e-125/aquaporin TIP2.1 [Zea mays]
GRMZM2G125095_T01	GRMZM2G125095		RNA.regulation of transcription.ABI3/VP1-related B3-domain-containing transcription factor family	weakly similar to ( 153) AT1G01030 | Symbols: NGA3 | NGA3 (NGATHA3); transcription factor | chr1:11864-12940 REVERSEmoderately similar to ( 263) loc_os10g39190 12010.m06689 protein RAV, putative seq=cds; coord=1:83643767..83645031:-1; parent_gene=GRMZM2G125095	1.36275	GO:0043231//intracellular membrane-bounded organelle	-	GO:0010468//regulation of gene expression;GO:0006350	gi|242035245|ref|XP_002465017.1|/5.19661e-105/hypothetical protein SORBIDRAFT_01g030520 [Sorghum bicolor]
GRMZM2G125571_T01	GRMZM2G125571		signalling.receptor kinases.legume-lectin	very weakly similar to (98.2) loc_os09g16650 12009.m04925 protein seed agglutinin I precursor, putative seq=cds; coord=3:219063340..219064565:1; parent_gene=GRMZM2G125571	12.1862	-	-	-	gi|308044517|ref|NP_001183268.1|/0/uncharacterized protein LOC100501661 precursor [Zea mays]
GRMZM2G125649_T01	GRMZM2G125649		not assigned.unknown	seq=cds; coord=1:225135193..225137974:1; parent_gene=GRMZM2G125649	2.40556	-	-	-	gi|242034015|ref|XP_002464402.1|/1.59066e-13/hypothetical protein SORBIDRAFT_01g017610 [Sorghum bicolor]
GRMZM2G126817_T01	GRMZM2G126817		RNA.regulation of transcription.NAC domain transcription factor family	moderately similar to ( 248) AT2G17040 | Symbols: anac036 | anac036 (Arabidopsis NAC domain containing protein 36); transcription factor | chr2:7407123-7408120 FORWARDweakly similar to ( 167) NAC68_ORYSA NAC domain-containing protein 68 (ONAC068) - Oryza sativa (Rice)moderately similar to ( 348) loc_os03g04070 12003.m05939 protein NAC domain-containing protein 68, putative, expressed seq=cds; coo…	2.17839	-	GO:0003676//nucleic acid binding	GO:0010468//regulation of gene expression	gi|242037049|ref|XP_002465919.1|/6.08725e-119/hypothetical protein SORBIDRAFT_01g048130 [Sorghum bicolor]
GRMZM2G127990_T01	GRMZM2G127990		signalling.receptor kinases.leucine rich repeat XI	highly similar to ( 877) AT2G24130 | Symbols: | leucine-rich repeat transmembrane protein kinase, putative | chr2:10258148-10261220 FORWARDmoderately similar to ( 398) PSKR_DAUCA Phytosulfokine receptor precursor (EC 2.7.11.1) (Phytosulfokine LRR receptor kinase) - Daucus carota (Carrot)nearly identical (1397) loc_os06g08690 12006.m05588 protein leucine-rich repeat receptor protein kinase EXS pre…	1.99902	GO:0031410//cytoplasmic vesicle	GO:0004672//protein kinase activity;GO:0032559	GO:0006464//cellular protein modification process	gi|242094982|ref|XP_002437981.1|/0/hypothetical protein SORBIDRAFT_10g005850 [Sorghum bicolor]
GRMZM2G129249_T01	GRMZM2G129249		stress.biotic	weakly similar to ( 105) loc_os01g25030 12001.m08969 protein dirigent, putative, expressed seq=cds; coord=4:189431954..189433518:1; parent_gene=GRMZM2G129249	1.90906	-	-	-	gi|37700483|gb|AAR00251.1|/3.37551e-22/dirigent [Saccharum hybrid cultivar Q117]
GRMZM2G129815_T01	GRMZM2G129815		not assigned.unknown	very weakly similar to (89.4) loc_os03g20330 12003.m07443 protein VQ motif family protein, expressed seq=cds; coord=9:134088631..134089643:1; parent_gene=GRMZM2G129815	5.48345	-	-	-	gi|242041113|ref|XP_002467951.1|/3.50181e-26/hypothetical protein SORBIDRAFT_01g037040 [Sorghum bicolor]
GRMZM2G130213_T01	GRMZM2G130213		protein.postranslational modification	moderately similar to ( 231) AT1G32320 | Symbols: ATMKK10 | ATMKK10; MAP kinase kinase/ kinase | chr1:11655156-11656073 FORWARDweakly similar to ( 140) M2K1_ORYSA Mitogen-activated protein kinase kinase 1 (EC 2.7.12.2) (MAP kinase kinase 1) (MAPKK1) (OsMEK1) - Oryza sativa (Rice)moderately similar to ( 401) loc_os02g46760 12002.m09713 protein OsMKK10-1 - putative MAPKK based on amino acid sequenc…	1.14634	-	GO:0004672//protein kinase activity;GO:0032559	GO:0006464//cellular protein modification process	gi|242066308|ref|XP_002454443.1|/6.74815e-171/hypothetical protein SORBIDRAFT_04g031130 [Sorghum bicolor]
GRMZM2G130943_T01	GRMZM2G130943		protein.postranslational modification	very weakly similar to (89.7) AT4G33920 | Symbols: | protein phosphatase 2C family protein / PP2C family protein | chr4:16260876-16262703 FORWARDweakly similar to ( 120) loc_os03g10950 12003.m06547 protein catalytic/ protein phosphatase type 2C, putative, expressed seq=cds; coord=9:147546974..147548039:-1; parent_gene=GRMZM2G130943	1.79683	GO:0043234//protein complex;GO:0043231//intracellular membrane-bounded organelle	GO:0043169//cation binding;GO:0004721//phosphoprotein phosphatase activity	GO:0006464//cellular protein modification process	gi|212275356|ref|NP_001130427.1|/4.18917e-33/uncharacterized protein LOC100191524 [Zea mays]
GRMZM2G131177_T01	GRMZM2G131177		protein.degradation.subtilases	moderately similar to ( 450) AT5G67360 | Symbols: ARA12 | ARA12; serine-type endopeptidase | chr5:26872192-26874465 REVERSEhighly similar to ( 905) loc_os04g35140 12004.m08604 protein subtilisin-like protease precursor, putative, expressed seq=cds; coord=2:51230856..51233601:-1; parent_gene=GRMZM2G131177	1.11605	GO:0031410//cytoplasmic vesicle	GO:0004175//endopeptidase activity;GO:0005515//protein binding	GO:0019538//protein metabolic process;GO:0044092//negative regulation of molecular function	gi|242073114|ref|XP_002446493.1|/0/hypothetical protein SORBIDRAFT_06g016860 [Sorghum bicolor]
GRMZM2G131315_T01	GRMZM2G131315		protein.degradation.serine protease	weakly similar to ( 196) AT1G15000 | Symbols: scpl50 | scpl50 (serine carboxypeptidase-like 50); serine-type carboxypeptidase | chr1:5168613-5169947 FORWARDweakly similar to ( 101) CBPX_ORYSA Serine carboxypeptidase-like precursor (EC 3.4.16.-) - Oryza sativa (Rice)moderately similar to ( 345) loc_os01g43890 12001.m10649 protein SCPL50, putative, expressed seq=cds; coord=8:145839649..145841307:1;…	1.50094	GO:0031410//cytoplasmic vesicle	GO:0004180//carboxypeptidase activity	GO:0019538//protein metabolic process	gi|115438723|ref|NP_001043641.1|/1.13794e-159/Os01g0629600 [Oryza sativa Japonica Group]
GRMZM2G131358_T01	GRMZM2G131358		not assigned.unknown	seq=cds; coord=7:65244033..65244231:-1; parent_gene=GRMZM2G131358	2.88758	-	-	-	gi|115478206|ref|NP_001062698.1|/7.12829e-15/Os09g0257900 [Oryza sativa Japonica Group]
GRMZM2G131629_T01	GRMZM2G131629		protein.postranslational modification	moderately similar to ( 432) AT3G22750 | Symbols: | protein kinase, putative | chr3:8037364-8039096 REVERSEvery weakly similar to (99.4) NORK_MEDTR Nodulation receptor kinase precursor (EC 2.7.11.1) (Does not make infections protein 2) (Symbiosis receptor-like kinase) (MtSYMRK) - Medicago truncatula (Barrel medic)highly similar to ( 603) loc_os03g53410 12003.m10311 protein ATMRK1, putative, expre…	1.03723	GO:0016020//membrane	GO:0004713//protein tyrosine kinase activity;GO:0032559	GO:0006464//cellular protein modification process	gi|242038155|ref|XP_002466472.1|/0/hypothetical protein SORBIDRAFT_01g008340 [Sorghum bicolor]
GRMZM2G132095_T01	GRMZM2G132095		not assigned.unknown	seq=cds; coord=5:115186638..115187815:1; parent_gene=GRMZM2G132095	1.63246	-	-	-	gi|226494775|ref|NP_001143048.1|/6.61658e-23/uncharacterized protein LOC100275516 [Zea mays]
GRMZM2G132284_T01	GRMZM2G132284		not assigned.unknown	weakly similar to ( 122) loc_os01g58490 12001.m11991 protein hypothetical protein seq=cds; coord=8:171617368..171618117:1; parent_gene=GRMZM2G132284	1.78773	-	-	-	gi|242058977|ref|XP_002458634.1|/4.32613e-67/hypothetical protein SORBIDRAFT_03g037105 [Sorghum bicolor]
GRMZM2G133055_T01	GRMZM2G133055		not assigned.unknown	seq=cds; coord=4:9800152..9801253:1; parent_gene=GRMZM2G133055	2.48171	-	-	-	gi|226533292|ref|NP_001145664.1|/6.73885e-54/uncharacterized protein LOC100279161 [Zea mays]
GRMZM2G133095_T01	GRMZM2G133095		not assigned.unknown	weakly similar to ( 110) AT5G12340 | Symbols: | unknown protein | chr5:3992948-3993610 REVERSEmoderately similar to ( 289) loc_os05g31970 12005.m07430 protein expressed protein seq=cds; coord=8:91312778..91313426:-1; parent_gene=GRMZM2G133095	8.55891	-	-	-	gi|242087775|ref|XP_002439720.1|/1.2348e-106/hypothetical protein SORBIDRAFT_09g019020 [Sorghum bicolor]
GRMZM2G133413_T01	GRMZM2G133413		cell.cycle	weakly similar to ( 171) AT5G10440 | Symbols: CYCD4;2 | CYCD4;2 (cyclin d4;2); cyclin-dependent protein kinase | chr5:3280611-3282342 REVERSEmoderately similar to ( 294) loc_os08g37390 12008.m07725 protein cyclin delta-2, putative, expressed seq=cds; coord=1:200723661..200726916:1; parent_gene=GRMZM2G133413	2.20375	-	-	-	gi|219887455|gb|ACL54102.1|/3.77878e-165/unknown [Zea mays]
GRMZM2G134450_T02	GRMZM2G134450		transport.calcium	moderately similar to ( 224) AT5G17860 | Symbols: CAX7 | CAX7 (calcium exchanger 7); calcium:sodium antiporter/ cation:cation antiporter | chr5:5902638-5904350 REVERSEmoderately similar to ( 406) loc_os03g45370 12003.m09566 protein K-exchanger-like protein, putative, expressed seq=cds; coord=1:259022596..259024912:-1; parent_gene=GRMZM2G134450	3.3894	GO:0044464//cell part	-	-	gi|226503045|ref|NP_001145820.1|/1.05153e-163/uncharacterized protein LOC100279327 [Zea mays]
GRMZM2G134528_T01	GRMZM2G134528		cell wall.cell wall proteins.AGPs.AGP	weakly similar to ( 119) loc_os06g44660 12006.m08993 protein fasciclin-like arabinogalactan protein 8 precursor, putative, expressed seq=cds; coord=5:89287541..89288511:1; parent_gene=GRMZM2G134528	2.1699	GO:0031410//cytoplasmic vesicle	-	-	gi|242060714|ref|XP_002451646.1|/8.5482e-83/hypothetical protein SORBIDRAFT_04g005190 [Sorghum bicolor]
GRMZM2G134941_T01	GRMZM2G134941		not assigned.unknown	weakly similar to ( 119) AT5G24860 | Symbols: FPF1 | FPF1 (FLOWERING PROMOTING FACTOR 1) | chr5:8541822-8542154 FORWARDweakly similar to ( 157) loc_os01g15340 12001.m08132 protein FPF1, putative, expressed seq=cds; coord=8:4969122..4969563:1; parent_gene=GRMZM2G134941	2.60013	-	-	-	gi|242056891|ref|XP_002457591.1|/1.24988e-43/hypothetical protein SORBIDRAFT_03g009910 [Sorghum bicolor]
GRMZM2G135108_T01	GRMZM2G135108		misc.peroxidases	moderately similar to ( 278) AT4G11290 | Symbols: | peroxidase, putative | chr4:6869993-6871476 FORWARDmoderately similar to ( 270) PER1_ORYSA Peroxidase 1 precursor (EC 1.11.1.7) - Oryza sativa (Rice)moderately similar to ( 471) loc_os05g06970 12005.m05223 protein peroxidase 1 precursor, putative, expressed seq=cds; coord=6:125011318..125012919:1; parent_gene=GRMZM2G135108	1.51799	GO:0031410//cytoplasmic vesicle	GO:0016209//antioxidant activity;GO:0005506//iron ion binding;GO:0003824//catalytic activity	GO:0006950//response to stress;GO:0008152//metabolic process	gi|45685283|gb|AAS75401.1|/0/peroxidase [Zea mays]
GRMZM2G135608_T01	GRMZM2G135608		stress.abiotic.heat	very weakly similar to (81.3) AT5G42020 | Symbols: BIP | BIP2; ATP binding | chr5:16807697-16810480 REVERSEvery weakly similar to (84.7) BIP4_TOBAC Luminal-binding protein 4 precursor (BiP 4) (78 kDa glucose-regulated protein homolog 4) (GRP 78-4) - Nicotiana tabacum (Common tobacco)weakly similar to ( 172) loc_os06g10990 12006.m05816 protein luminal-binding protein precursor, putative, expressed…	1.69757	GO:0043231//intracellular membrane-bounded organelle;GO:0031410//cytoplasmic vesicle	-	-	gi|308081090|ref|NP_001183086.1|/3.22836e-124/uncharacterized protein LOC100501445 precursor [Zea mays]
GRMZM2G135730_T01	GRMZM2G135730		not assigned.unknown	seq=cds; coord=2:118423324..118424180:-1; parent_gene=GRMZM2G135730	1.34102	-	-	-	-
GRMZM2G136580_T01	GRMZM2G136580		not assigned.unknown	moderately similar to ( 419) AT2G41640 | Symbols: | transferase, transferring glycosyl groups | chr2:17360654-17362391 FORWARDhighly similar to ( 743) loc_os07g46380 12007.m08855 protein glycosyltransferase, putative, expressed seq=cds; coord=7:170833624..170835983:1; parent_gene=GRMZM2G136580	3.20406	-	GO:0016740//transferase activity	-	gi|242046804|ref|XP_002461148.1|/0/hypothetical protein SORBIDRAFT_02g041650 [Sorghum bicolor]
GRMZM2G137435_T01	GRMZM2G137435		signalling.phosphinositides.phosphoinositide phospholipase C	highly similar to ( 645) AT2G40116 | Symbols: | phosphoinositide-specific phospholipase C family protein | chr2:16751782-16754311 FORWARDhighly similar to ( 964) loc_os12g37560 12012.m26931 protein phospholipase C, putative, expressed seq=cds; coord=5:65765012..65768851:1; parent_gene=GRMZM2G137435	1.09261	-	GO:0004629//phospholipase C activity;GO:0060089	GO:0044238//primary metabolic process;GO:0023060	gi|195607000|gb|ACG25330.1|/0/phospholipase C [Zea mays]
GRMZM2G137507_T01	GRMZM2G137507		misc.GDSL-motif lipase	moderately similar to ( 322) AT2G04570 | Symbols: | GDSL-motif lipase/hydrolase family protein | chr2:1594747-1596129 FORWARDweakly similar to ( 194) APG_BRANA Anter-specific proline-rich protein APG (Protein CEX) (Fragment) - Brassica napus (Rape)moderately similar to ( 469) loc_os02g09610 12002.m06258 protein anther-specific proline-rich protein APG precursor, putative, expressed seq=cds; coord…	1.17305	GO:0031410//cytoplasmic vesicle	GO:0016787//hydrolase activity	GO:0044238//primary metabolic process	gi|242060810|ref|XP_002451694.1|/6.65742e-157/hypothetical protein SORBIDRAFT_04g006050 [Sorghum bicolor]
GRMZM2G137710_T01	GRMZM2G137710		protein.postranslational modification	moderately similar to ( 235) AT3G44610 | Symbols: | protein kinase family protein | chr3:16188266-16192107 REVERSEweakly similar to ( 158) G11A_ORYSA Protein kinase G11A (EC 2.7.11.1) - Oryza sativa (Rice)moderately similar to ( 296) loc_os11g05320 12011.m04730 protein protein kinase PVPK-1, putative, expressed seq=cds; coord=4:188209425..188210913:-1; parent_gene=GRMZM2G137710	1.00635	GO:0009536//plastid	GO:0016301//kinase activity	-	gi|242067445|ref|XP_002448999.1|/5.9182e-89/hypothetical protein SORBIDRAFT_05g003060 [Sorghum bicolor]
GRMZM2G137891_T02	GRMZM2G137891		not assigned.unknown	moderately similar to ( 251) AT5G65840 | Symbols: | FUNCTIONS IN: molecular_function unknown; INVOLVED IN: biological_process unknown; LOCATED IN: chloroplast stroma, chloroplast; EXPRESSED IN: 22 plant structures; EXPRESSED DURING: 13 growth stages; CONTAINS InterPro DOMAIN/s: Thioredoxin fold (InterPro:IPR012335), Thioredoxin-like fold (InterPro:IPR012336); BEST Arabidopsis thaliana protein mat…	1.09662	GO:0043231//intracellular membrane-bounded organelle	GO:0003824//catalytic activity	GO:0019725//cellular homeostasis	gi|223975733|gb|ACN32054.1|/1.27954e-119/unknown [Zea mays]
GRMZM2G138198_T01	GRMZM2G138198		signalling.receptor kinases.leucine rich repeat III	moderately similar to ( 486) AT3G20190 | Symbols: | leucine-rich repeat transmembrane protein kinase, putative | chr3:7044997-7047212 FORWARDweakly similar to ( 134) PSKR_DAUCA Phytosulfokine receptor precursor (EC 2.7.11.1) (Phytosulfokine LRR receptor kinase) - Daucus carota (Carrot)highly similar to ( 800) loc_os08g40990 12008.m08078 protein receptor-like protein kinase 1, putative, expressed …	1.50762	GO:0031410//cytoplasmic vesicle	GO:0016301//kinase activity;GO:0032559	GO:0006464//cellular protein modification process	gi|308080634|ref|NP_001182863.1|/0/uncharacterized protein LOC100501125 precursor [Zea mays]
GRMZM2G138365_T01	GRMZM2G138365		not assigned.unknown	seq=cds; coord=5:176549610..176549966:1; parent_gene=GRMZM2G138365	4.29227	-	-	-	-
GRMZM2G138750_T01	GRMZM2G138750		misc.cytochrome P450	highly similar to ( 659) AT2G26710 | Symbols: BAS1, CYP734A1, CYP72B1 | BAS1 (PHYB ACTIVATION TAGGED SUPPRESSOR 1); oxygen binding / steroid hydroxylase | chr2:11380700-11383413 FORWARDmoderately similar to ( 372) C72A1_CATRO Cytochrome P450 72A1 (EC 1.3.3.9) (CYPLXXII) (Secologanin synthase) (SLS) - Catharanthus roseus (Rosy periwinkle) (Madagascar periwinkle)highly similar to ( 836) loc_os01g29…	1.87088	-	GO:0016634;GO:0005506//iron ion binding	GO:0008152//metabolic process	gi|195652235|gb|ACG45585.1|/0/cytochrome P450 CYP734A8 [Zea mays]
GRMZM2G138770_T01	GRMZM2G138770		protein.degradation.AAA type	moderately similar to ( 485) AT5G40010 | Symbols: AATP1 | AATP1 (AAA-ATPase 1); ATP binding / ATPase/ nucleoside-triphosphatase/ nucleotide binding | chr5:16020218-16021762 REVERSEhighly similar to ( 649) loc_os12g44190 12012.m08190 protein ATPase 3, putative, expressed seq=cds; coord=2:34473212..34475281:-1; parent_gene=GRMZM2G138770	1.57305	GO:0031410//cytoplasmic vesicle	GO:0016462//pyrophosphatase activity;GO:0032559	GO:0009987//cellular process	gi|194699168|gb|ACF83668.1|/0/unknown [Zea mays]
GRMZM2G138870_T01	GRMZM2G138870		not assigned.unknown	weakly similar to ( 108) AT4G27435 | Symbols: | unknown protein | chr4:13723903-13724872 FORWARDweakly similar to ( 159) loc_os04g58160 12004.m10699 protein fiber protein Fb34, putative, expressed seq=cds; coord=10:148328494..148329707:1; parent_gene=GRMZM2G138870	4.59034	GO:0044464//cell part	-	-	gi|226505366|ref|NP_001152519.1|/2.22863e-53/fiber protein Fb34 precursor [Zea mays]
GRMZM2G139513_T01	GRMZM2G139513		cell wall.modification	weakly similar to ( 115) loc_os04g26230 12004.m07749 protein pollen allergen Phl p 2 precursor, putative, expressed seq=cds; coord=4:45542662..45543417:1; parent_gene=GRMZM2G139513	1.52018	GO:0031410//cytoplasmic vesicle	-	GO:0000003//reproduction	gi|195626970|gb|ACG35315.1|/5.55676e-62/pollen allergen Phl p 2 precursor [Zea mays]
GRMZM2G139522_T01	GRMZM2G139522		not assigned.unknown	moderately similar to ( 228) AT3G50340 | Symbols: | unknown protein | chr3:18665333-18666544 REVERSEmoderately similar to ( 384) loc_os09g28340 12009.m05985 protein expressed protein seq=cds; coord=7:125836503..125840464:-1; parent_gene=GRMZM2G139522	2.90568	-	-	-	gi|242049488|ref|XP_002462488.1|/1.20957e-115/hypothetical protein SORBIDRAFT_02g026580 [Sorghum bicolor]
GRMZM2G140752_T01	GRMZM2G140752		signalling.receptor kinases.DUF 26	moderately similar to ( 484) AT4G05200 | Symbols: | protein kinase family protein | chr4:2679793-2682309 REVERSEweakly similar to ( 194) NORK_PEA Nodulation receptor kinase precursor (EC 2.7.11.1) - Pisum sativum (Garden pea)highly similar to ( 725) loc_os05g41370 12005.m08312 protein receptor-like protein kinase homolog RK20-1, putative, expressed seq=cds; coord=6:155625049..155628293:-1; parent…	5.58328	-	GO:0004672//protein kinase activity;GO:0000166//nucleotide binding	-	gi|226500408|ref|NP_001146710.1|/0/uncharacterized protein LOC100280312 precursor [Zea mays]
GRMZM2G141133_T01	GRMZM2G141133		not assigned.unknown	seq=cds; coord=10:72613630..72614241:-1; parent_gene=GRMZM2G141133	2.8168	-	-	-	gi|242078331|ref|XP_002443934.1|/7.71077e-28/hypothetical protein SORBIDRAFT_07g004635 [Sorghum bicolor]
GRMZM2G141353_T02	GRMZM2G141353		not assigned.unknown	seq=cds; coord=8:74660591..74661713:-1; parent_gene=GRMZM2G141353	1.23178	GO:0043231//intracellular membrane-bounded organelle	-	-	gi|242091491|ref|XP_002441578.1|/6.45149e-16/hypothetical protein SORBIDRAFT_09g029710 [Sorghum bicolor]
GRMZM2G141386_T01	GRMZM2G141386		RNA.RNA binding	weakly similar to ( 127) AT3G54770 | Symbols: | RNA recognition motif (RRM)-containing protein | chr3:20273863-20275731 REVERSEmoderately similar to ( 214) loc_os03g17760 12003.m07201 protein RNA recognition motif family protein, expressed seq=cds; coord=1:43764764..43767544:-1; parent_gene=GRMZM2G141386	1.03747	-	GO:0003676//nucleic acid binding	-	gi|194697728|gb|ACF82948.1|/2.14064e-76/unknown [Zea mays]
GRMZM2G141638_T01	GRMZM2G141638		RNA.regulation of transcription.AP2/EREBP, APETALA2/Ethylene-responsive element binding protein family	moderately similar to ( 354) AT5G17430 | Symbols: BBM | BBM (BABY BOOM); DNA binding / transcription factor | chr5:5742542-5745568 REVERSEmoderately similar to ( 353) BBM2_BRANA Protein BABY BOOM 2 (BnBBM2) - Brassica napus (Rape)highly similar to ( 676) loc_os01g67410 12001.m12845 protein AP2/EREBP transcription factor BABY BOOM, putative, expressed seq=cds; coord=3:166793199..166797020:1; paren…	2.34138	-	-	GO:0006350	gi|242059563|ref|XP_002458927.1|/0/hypothetical protein SORBIDRAFT_03g042810 [Sorghum bicolor]
GRMZM2G141999_T01	GRMZM2G141999		not assigned.unknown	weakly similar to ( 172) AT3G24420 | Symbols: | hydrolase, alpha/beta fold family protein | chr3:8863111-8864883 REVERSEmoderately similar to ( 280) loc_os05g51240 12005.m09189 protein sigma factor sigB regulation protein rsbQ, putative, expressed seq=cds; coord=6:167644086..167645182:1; parent_gene=GRMZM2G141999	3.48259	-	-	-	gi|242091573|ref|XP_002441619.1|/3.23968e-108/hypothetical protein SORBIDRAFT_09g030500 [Sorghum bicolor]
GRMZM2G142390_T02	GRMZM2G142390		protein.postranslational modification.kinase.receptor like cytoplasmatic kinase VII	moderately similar to ( 253) AT2G05940 | Symbols: | protein kinase, putative | chr2:2287514-2289270 REVERSEweakly similar to ( 122) NORK_MEDTR Nodulation receptor kinase precursor (EC 2.7.11.1) (Does not make infections protein 2) (Symbiosis receptor-like kinase) (MtSYMRK) - Medicago truncatula (Barrel medic)moderately similar to ( 345) loc_os03g29410 12003.m08215 protein protein kinase APK1B, ch…	2.24531	GO:0043231//intracellular membrane-bounded organelle	GO:0004672//protein kinase activity;GO:0032559	GO:0006464//cellular protein modification process	gi|242035513|ref|XP_002465151.1|/2.54505e-113/hypothetical protein SORBIDRAFT_01g032820 [Sorghum bicolor]
GRMZM2G142584_T01	GRMZM2G142584		misc.oxidases - copper, flavone etc.	highly similar to ( 684) AT3G13390 | Symbols: sks11 | sks11 (SKU5 Similar 11); copper ion binding / oxidoreductase | chr3:4351401-4353289 REVERSEhighly similar to ( 686) NTP3_TOBAC Pollen-specific protein NTP303 precursor - Nicotiana tabacum (Common tobacco)highly similar to ( 927) loc_os05g40740 12005.m083761 protein pollen-specific protein NTP303 precursor, putative, expressed seq=cds; coord=8:…	2.44392	GO:0031410//cytoplasmic vesicle	GO:0046914//transition metal ion binding;GO:0003824//catalytic activity	GO:0008152//metabolic process	gi|238908775|gb|ACF86554.2|/0/unknown [Zea mays]
GRMZM2G142863_T02	GRMZM2G142863		TCA / org. transformation.TCA.2-oxoglutarate dehydrogenase	nearly identical (1729) AT5G65750 | Symbols: | 2-oxoglutarate dehydrogenase E1 component, putative / oxoglutarate decarboxylase, putative / alpha-ketoglutaric dehydrogenase, putative | chr5:26304212-26307947 FORWARDnearly identical (1779) loc_os04g32020 12004.m101710 protein 2-oxoglutarate dehydrogenase E1 component, mitochondrial precursor, putative, expressed seq=cds; coord=2:69290512..69296784…	1.05979	GO:0043231//intracellular membrane-bounded organelle	GO:0046914//transition metal ion binding;GO:0016624//oxidoreductase activity, acting on the aldehyde or oxo group of donors, disulfide as acceptor;GO:0019842//vitamin binding	GO:0010038//response to metal ion;GO:0006007//glucose catabolic process	gi|293335820|ref|NP_001169698.1|/0/uncharacterized protein LOC100383579 [Zea mays]
GRMZM2G142999_T01	GRMZM2G142999		RNA.regulation of transcription.ABI3/VP1-related B3-domain-containing transcription factor family	weakly similar to ( 154) AT3G61970 | Symbols: NGA2 | NGA2 (NGATHA2); transcription factor | chr3:22951829-22952728 FORWARDmoderately similar to ( 278) loc_os10g39190 12010.m06689 protein RAV, putative seq=cds; coord=9:125563700..125564837:-1; parent_gene=GRMZM2G142999	7.74249	GO:0043231//intracellular membrane-bounded organelle	GO:0003676//nucleic acid binding	GO:0048856//anatomical structure development;GO:0010468//regulation of gene expression;GO:0006351//transcription, DNA-dependent;GO:0007275//multicellular organismal development	gi|242035245|ref|XP_002465017.1|/1.39661e-106/hypothetical protein SORBIDRAFT_01g030520 [Sorghum bicolor]
GRMZM2G143352_T01	GRMZM2G143352		RNA.regulation of transcription.Aux/IAA family	very weakly similar to (94.7) AT5G57420 | Symbols: IAA33 | IAA33 (INDOLE-3-ACETIC ACID INDUCIBLE 33); transcription factor | chr5:23270024-23270959 FORWARDvery weakly similar to (92.8) loc_os04g55950 12004.m10486 protein expressed protein seq=cds; coord=10:145949349..145950277:1; parent_gene=GRMZM2G143352	12.9899	-	-	GO:0009725//response to hormone stimulus	gi|242074606|ref|XP_002447239.1|/6.51004e-35/hypothetical protein SORBIDRAFT_06g031100 [Sorghum bicolor]
GRMZM2G143397_T01	GRMZM2G143397		not assigned.unknown	seq=cds; coord=2:129698222..129698803:-1; parent_gene=GRMZM2G143397	1.31644	-	-	-	gi|162463765|ref|NP_001104841.1|/6.07617e-08/root cap-specific glycine-rich protein precursor [Zea mays]
GRMZM2G144671_T01	GRMZM2G144671		not assigned.unknown	seq=cds; coord=3:8983653..8984141:1; parent_gene=GRMZM2G144671	1.95851	-	-	-	gi|357125591|ref|XP_003564476.1|/2.58593e-23/PREDICTED: uncharacterized protein LOC100833250 [Brachypodium distachyon]
GRMZM2G144950_T01	GRMZM2G144950		not assigned.unknown	weakly similar to ( 141) loc_os07g46710 12007.m29302 protein expressed protein seq=cds; coord=7:171580141..171582606:-1; parent_gene=GRMZM2G144950	2.39728	-	-	-	gi|242051192|ref|XP_002463340.1|/9.75129e-44/hypothetical protein SORBIDRAFT_02g042020 [Sorghum bicolor]
GRMZM2G144985_T01	GRMZM2G144985		lipid metabolism.exotics (steroids, squalene etc).sphingolipids	highly similar to ( 643) AT4G36480 | Symbols: ATLCB1, LCB1, EMB2779, FBR11 | ATLCB1 (LONG-CHAIN BASE1); protein binding / serine C-palmitoyltransferase | chr4:17218598-17221124 FORWARDhighly similar to ( 830) loc_os03g14800 12003.m35124 protein serine palmitoyltransferase 1, putative, expressed seq=cds; coord=9:142289400..142294418:1; parent_gene=GRMZM2G144985	1.08216	GO:0031410//cytoplasmic vesicle	GO:0016454;GO:0048037//cofactor binding	GO:0008152//metabolic process	gi|226529644|ref|NP_001147940.1|/0/serine palmitoyltransferase 1 [Zea mays]
GRMZM2G146034_T02	GRMZM2G146034		transport.ABC transporters and multidrug resistance systems	weakly similar to ( 190) AT3G28345 | Symbols: | ABC transporter family protein | chr3:10593921-10598775 REVERSEmoderately similar to ( 233) MDR_ORYSA Putative multidrug resistance protein (P-glycoprotein) - Oryza sativa (Rice)moderately similar to ( 233) loc_os02g09720 12002.m06269 protein multidrug resistance protein 13, putative, expressed seq=cds; coord=4:234421148..234421790:1; parent_gene=GR…	3.27678	GO:0031224//intrinsic to membrane	GO:0042626//ATPase activity, coupled to transmembrane movement of substances;GO:0032559	GO:0006810//transport	gi|242064316|ref|XP_002453447.1|/2.38821e-62/hypothetical protein SORBIDRAFT_04g006100 [Sorghum bicolor]
GRMZM2G146108_T01	GRMZM2G146108		hormone metabolism.auxin.induced-regulated-responsive-activated	weakly similar to ( 119) loc_os03g45850 12003.m09608 protein OsSAUR16 - Auxin-responsive SAUR gene family member seq=cds; coord=1:258795855..258796594:-1; parent_gene=GRMZM2G146108	1.03537	GO:0043231//intracellular membrane-bounded organelle	GO:0005515//protein binding	GO:0009755//hormone-mediated signaling pathway	gi|48374991|gb|AAT42187.1|/4.81973e-47/putative auxin-induced protein family [Zea mays]
GRMZM2G146308_T01	GRMZM2G146308		not assigned.unknown	seq=cds; coord=9:43441923..43442952:1; parent_gene=GRMZM2G146308	1.27553	-	-	-	gi|238007590|gb|ACR34830.1|/5.21975e-15/unknown [Zea mays]
GRMZM2G148237_T01	GRMZM2G148237		not assigned.unknown	very weakly similar to (87.4) loc_os03g02300 12003.m05772 protein expressed protein seq=cds; coord=6:123334989..123335822:-1; parent_gene=GRMZM2G148237	2.06701	-	-	-	gi|308044245|ref|NP_001183329.1|/2.14953e-37/uncharacterized protein LOC100501732 [Zea mays]
GRMZM2G148706_T01	GRMZM2G148706		protein.degradation.ubiquitin.E3.RING	weakly similar to ( 103) AT2G35000 | Symbols: | zinc finger (C3HC4-type RING finger) family protein | chr2:14751809-14752945 REVERSEmoderately similar to ( 314) loc_os03g08920 12003.m06398 protein RING-H2 finger protein ATL3B precursor, putative, expressed seq=cds; coord=1:18984504..18985995:-1; parent_gene=GRMZM2G148706	1.02704	-	GO:0046914//transition metal ion binding;GO:0019787//small conjugating protein ligase activity	GO:0006952//defense response;GO:0009743//response to carbohydrate stimulus;GO:0032446//protein modification by small protein conjugation	gi|219362621|ref|NP_001137082.1|/1.13212e-133/uncharacterized protein LOC100217255 precursor [Zea mays]
GRMZM2G148904_T01	GRMZM2G148904		development.unspecified	moderately similar to ( 277) AT2G41380 | Symbols: | embryo-abundant protein-related | chr2:17251981-17252886 FORWARDweakly similar to ( 195) loc_os01g40660 12001.m10336 protein embryonic abundant protein-like, putative, expressed seq=cds; coord=8:34579789..34581430:1; parent_gene=GRMZM2G148904	2.88317	GO:0043231//intracellular membrane-bounded organelle	GO:0016741	GO:0010038//response to metal ion	gi|223942327|gb|ACN25247.1|/2.94665e-153/unknown [Zea mays]
GRMZM2G149189_T01	GRMZM2G149189		misc.UDP glucosyl and glucoronyl transferases	moderately similar to ( 468) AT5G20260 | Symbols: | catalytic | chr5:6836806-6839382 REVERSEhighly similar to ( 598) loc_os02g39960 12002.m09082 protein exostosin family protein, putative seq=cds; coord=5:184064747..184066999:-1; parent_gene=GRMZM2G149189	2.00044	GO:0016020//membrane	GO:0016757//transferase activity, transferring glycosyl groups	-	gi|242065760|ref|XP_002454169.1|/1.32725e-177/hypothetical protein SORBIDRAFT_04g025885 [Sorghum bicolor]
GRMZM2G149219_T01	GRMZM2G149219		RNA.regulation of transcription.WRKY domain transcription factor family	weakly similar to ( 119) loc_os03g45450 12003.m09573 protein OsWRKY60 - Superfamily of rice TFs having WRKY and zinc finger domains, expressed seq=cds; coord=1:258955026..258956380:1; parent_gene=GRMZM2G149219	4.61548	-	GO:0003677//DNA binding	GO:0010467//gene expression	gi|226533036|ref|NP_001144756.1|/2.29167e-34/uncharacterized protein LOC100277808 [Zea mays]
GRMZM2G149238_T05	GRMZM2G149238		not assigned.unknown	seq=cds; coord=1:258961565..258962164:-1; parent_gene=GRMZM2G149238	1.27695	-	-	-	gi|162459891|ref|NP_001105318.1|/2.45887e-07/TATA-box-binding protein 1 [Zea mays]
GRMZM2G150209_T02	GRMZM2G150209		not assigned.unknown	moderately similar to ( 371) AT5G13570 | Symbols: DCP2, TDT, ATDCP2 | DCP2 (DECAPPING 2); hydrolase/ m7G(5)pppN diphosphatase/ mRNA binding / protein homodimerization | chr5:4367532-4369992 FORWARDhighly similar to ( 530) loc_os02g56210 12002.m33973 protein mRNA decapping enzyme 2, putative, expressed seq=cds; coord=6:88898226..88901822:1; parent_gene=GRMZM2G150209	1.03986	GO:0030529//ribonucleoprotein complex	GO:0042802//identical protein binding;GO:0046914//transition metal ion binding;GO:0003723//RNA binding;GO:0016462//pyrophosphatase activity	GO:0031086//nuclear-transcribed mRNA catabolic process, deadenylation-independent decay	gi|226533156|ref|NP_001150332.1|/3.96332e-179/mRNA decapping enzyme 2 [Zea mays]
GRMZM2G150468_T01	GRMZM2G150468		transport.peptides and oligopeptides	moderately similar to ( 384) AT1G69870 | Symbols: | proton-dependent oligopeptide transport (POT) family protein | chr1:26316208-26320097 FORWARDhighly similar to ( 739) loc_os04g56560 12004.m10545 protein peptide transporter PTR2, putative, expressed seq=cds; coord=2:3747886..3750092:1; parent_gene=GRMZM2G150468	2.97635	GO:0016020//membrane	GO:0015112//nitrate transmembrane transporter activity	GO:0048856//anatomical structure development;GO:0015833//peptide transport;GO:0015706//nitrate transport;GO:0003006//developmental process involved in reproduction;GO:0009791//post-embryonic development;GO:0031669//cellular response to nutrient levels	gi|242077512|ref|XP_002448692.1|/0/hypothetical protein SORBIDRAFT_06g031620 [Sorghum bicolor]
GRMZM2G150648_T01	GRMZM2G150648		not assigned.unknown	moderately similar to ( 228) loc_os02g57600 12002.m10781 protein expressed protein seq=cds; coord=4:170515420..170518324:-1; parent_gene=GRMZM2G150648	1.14328	-	GO:0016741;GO:0003676//nucleic acid binding	GO:0042254//ribosome biogenesis;GO:0006399//tRNA metabolic process	gi|212274633|ref|NP_001130537.1|/3.38814e-124/uncharacterized protein LOC100191636 [Zea mays]
GRMZM2G151216_T01	GRMZM2G151216		signalling.receptor kinases.leucine rich repeat III	moderately similar to ( 430) AT1G50610 | Symbols: | leucine-rich repeat transmembrane protein kinase, putative | chr1:18742171-18744501 FORWARDweakly similar to ( 114) KPRO_MAIZE Putative receptor protein kinase ZmPK1 precursor (EC 2.7.11.1) - Zea mays (Maize)highly similar to ( 770) loc_os08g40990 12008.m08078 protein receptor-like protein kinase 1, putative, expressed seq=cds; coord=1:190094277…	2.07207	GO:0031410//cytoplasmic vesicle	GO:0016301//kinase activity;GO:0032559	GO:0006464//cellular protein modification process	gi|13506812|gb|AAK28346.1|AF243041_1/0/receptor-like protein kinase 1 [Zea mays]
GRMZM2G151542_T01	GRMZM2G151542		RNA.regulation of transcription.AP2/EREBP, APETALA2/Ethylene-responsive element binding protein family	weakly similar to ( 186) loc_os01g46870 12001.m10884 protein ap2 domain protein, putative, expressed seq=cds; coord=8:148134411..148136432:-1; parent_gene=GRMZM2G151542	1.42094	-	-	-	gi|212721400|ref|NP_001132184.1|/7.02259e-84/uncharacterized protein LOC100193610 [Zea mays]
GRMZM2G151639_T01	GRMZM2G151639		RNA.regulation of transcription.C2H2 zinc finger family	very weakly similar to (99.4) AT2G41940 | Symbols: ZFP8 | ZFP8 (ZINC FINGER PROTEIN 8); nucleic acid binding / transcription factor/ zinc ion binding | chr2:17507556-17508329 FORWARDweakly similar to ( 172) loc_os08g36110 12008.m07600 protein zinc finger protein, putative, expressed seq=cds; coord=4:64101436..64102914:1; parent_gene=GRMZM2G151639	1.81311	-	-	-	gi|226530854|ref|NP_001142755.1|/5.61191e-109/uncharacterized protein LOC100275104 [Zea mays]
GRMZM2G152000_T01	GRMZM2G152000		not assigned.unknown	seq=cds; coord=2:35674894..35676093:1; parent_gene=GRMZM2G152000	1.91543	-	GO:0046914//transition metal ion binding	-	gi|226531890|ref|NP_001148777.1|/6.34443e-97/zinc finger, C3HC4 type family protein [Zea mays]
GRMZM2G152123_T01	GRMZM2G152123		not assigned.unknown	seq=cds; coord=1:227008686..227009437:-1; parent_gene=GRMZM2G152123	1.01884	-	-	-	-
GRMZM2G153268_T01	GRMZM2G153268		development.unspecified	moderately similar to ( 280) AT3G61230 | Symbols: | LIM domain-containing protein | chr3:22664601-22665503 REVERSEweakly similar to ( 198) SF3_HELAN Pollen-specific protein SF3 - Helianthus annuus (Common sunflower)moderately similar to ( 350) loc_os04g45010 12004.m09455 protein pollen-specific protein SF3, putative, expressed seq=cds; coord=2:23133999..23135553:1; parent_gene=GRMZM2G153268	2.29287	-	GO:0046914//transition metal ion binding	-	gi|212720656|ref|NP_001132843.1|/2.47807e-105/uncharacterized protein LOC100194335 [Zea mays]
GRMZM2G153871_T01	GRMZM2G153871		secondary metabolism.phenylpropanoids.lignin biosynthesis.PAL	moderately similar to ( 440) AT2G37040 | Symbols: pal1, ATPAL1 | pal1 (Phe ammonia lyase 1); phenylalanine ammonia-lyase | chr2:15557602-15560237 REVERSEhighly similar to ( 561) PAL2_ORYSA Phenylalanine ammonia-lyase (EC 4.3.1.5) - Oryza sativa (Rice)highly similar to ( 561) loc_os02g41680 12002.m09204 protein phenylalanine ammonia-lyase, putative, expressed seq=cds; coord=4:231695319..231697748:…	6.36259	GO:0044424//intracellular part	GO:0016841//ammonia-lyase activity	GO:0006575//cellular modified amino acid metabolic process;GO:0006558//L-phenylalanine metabolic process	gi|293332887|ref|NP_001168086.1|/2.05837e-160/uncharacterized protein LOC100381820 [Zea mays]
GRMZM2G154332_T01	GRMZM2G154332		hormone metabolism.auxin.induced-regulated-responsive-activated	weakly similar to ( 113) loc_os02g52990 12002.m10329 protein OsSAUR12 - Auxin-responsive SAUR gene family member, expressed seq=cds; coord=5:210475561..210476355:-1; parent_gene=GRMZM2G154332	7.95082	-	-	GO:0050896//response to stimulus	gi|226533132|ref|NP_001151012.1|/7.88529e-38/SAUR12 - auxin-responsive SAUR family member [Zea mays]
GRMZM2G154872_T01	GRMZM2G154872		protein.degradation.ubiquitin.E3.SCF.FBOX	highly similar to ( 552) loc_os06g49340 12006.m09458 protein F-box domain containing protein, expressed seq=cds; coord=6:86182097..86183649:-1; parent_gene=GRMZM2G154872	4.81015	-	-	-	gi|293332311|ref|NP_001168586.1|/0/uncharacterized protein LOC100382370 [Zea mays]
GRMZM2G155686_T01	GRMZM2G155686		hormone metabolism.gibberelin.synthesis-degradation.GA2 oxidase	weakly similar to ( 196) AT1G78440 | Symbols: ATGA2OX1 | ATGA2OX1 (gibberellin 2-oxidase 1); gibberellin 2-beta-dioxygenase | chr1:29511772-29512990 REVERSEweakly similar to ( 199) G2OX1_PEA Gibberellin 2-beta-dioxygenase 1 (EC 1.14.11.13) (Gibberellin 2-beta-hydroxylase 1) (Gibberellin 2-oxidase 1) (GA 2-oxidase 1) (Protein SLENDER) - Pisum sativum (Garden pea)moderately similar to ( 268) loc_os…	1.52483	-	GO:0003824//catalytic activity	GO:0016101//diterpenoid metabolic process	gi|212721130|ref|NP_001131206.1|/0/uncharacterized protein LOC100192514 [Zea mays]
GRMZM2G156307_T01	GRMZM2G156307		not assigned.unknown	weakly similar to ( 199) AT5G23100 | Symbols: | unknown protein | chr5:7753557-7754390 FORWARDmoderately similar to ( 319) loc_os02g47980 12002.m09832 protein plant-specific domain TIGR01570 family protein, expressed seq=cds; coord=4:161041695..161043130:1; parent_gene=GRMZM2G156307	3.37585	GO:0043231//intracellular membrane-bounded organelle	-	-	gi|226507522|ref|NP_001151133.1|/1.74536e-103/LOC100284766 [Zea mays]
GRMZM2G156620_T01	GRMZM2G156620		lipid metabolism.FA synthesis and FA elongation.beta ketoacyl CoA synthase	highly similar to ( 716) AT2G26640 | Symbols: KCS11 | KCS11 (3-KETOACYL-COA SYNTHASE 11); acyltransferase/ catalytic/ transferase, transferring acyl groups other than amino-acyl groups | chr2:11330094-11331623 FORWARDhighly similar to ( 818) loc_os05g49900 12005.m09060 protein fatty acid elongase, putative, expressed seq=cds; coord=6:165800173..165802545:-1; parent_gene=GRMZM2G156620	1.21076	GO:0044464//cell part	GO:0016746//transferase activity, transferring acyl groups	GO:0006631//fatty acid metabolic process	gi|242091449|ref|XP_002441557.1|/0/hypothetical protein SORBIDRAFT_09g029260 [Sorghum bicolor]
GRMZM2G157824_T01	GRMZM2G157824		not assigned.unknown	weakly similar to ( 142) loc_os01g12910 12001.m07904 protein thioesterase family protein, expressed seq=cds; coord=1:101755341..101756268:-1; parent_gene=GRMZM2G157824	1.00547	GO:0043231//intracellular membrane-bounded organelle	-	-	gi|242055861|ref|XP_002457076.1|/1.0361e-34/hypothetical protein SORBIDRAFT_03g000890 [Sorghum bicolor]
GRMZM2G159711_T01	GRMZM2G159711		not assigned.unknown	moderately similar to ( 341) loc_os03g56500 12003.m10559 protein expressed protein seq=cds; coord=5:5347274..5348906:1; parent_gene=GRMZM2G159711	1.17295	-	-	-	gi|293336718|ref|NP_001169179.1|/0/uncharacterized protein LOC100383029 [Zea mays]
GRMZM2G159904_T01	GRMZM2G159904		not assigned.unknown	very weakly similar to (82.4) AT4G16580 | Symbols: | catalytic | chr4:9341152-9342555 REVERSEweakly similar to ( 152) loc_os02g42250 12002.m09261 protein T-cell activation protein phosphatase 2C-like protein, putative seq=cds; coord=5:187808501..187809804:-1; parent_gene=GRMZM2G159904	3.37843	-	GO:0016791//phosphatase activity	-	gi|226494574|ref|NP_001151986.1|/1.4605e-142/T-cell activation protein phosphatase 2C-like protein [Zea mays]
GRMZM2G159908_T02	GRMZM2G159908		signalling.receptor kinases.wall associated kinase	weakly similar to ( 171) AT3G55950 | Symbols: CCR3, ATCRR3 | CCR3 (ARABIDOPSIS THALIANA CRINKLY4 RELATED 3); kinase | chr3:20753903-20756347 REVERSEweakly similar to ( 131) CRI4_MAIZE Putative receptor protein kinase CRINKLY4 precursor (EC 2.7.11.1) - Zea mays (Maize)moderately similar to ( 321) loc_os11g44500 12011.m08283 protein ATP binding protein, putative, expressed seq=cds; coord=3:22930906…	3.38337	-	-	-	gi|212723392|ref|NP_001131825.1|/0/uncharacterized protein LOC100193199 [Zea mays]
GRMZM2G160113_T01	GRMZM2G160113		stress.abiotic.cold	moderately similar to ( 231) loc_os01g27190 12001.m09170 protein SRC2, putative, expressed seq=cds; coord=3:69375784..69376853:1; parent_gene=GRMZM2G160113	2.14814	-	-	-	gi|226509914|ref|NP_001141810.1|/1.66512e-122/uncharacterized protein LOC100273948 [Zea mays]
GRMZM2G160541_T02	GRMZM2G160541		secondary metabolism.phenylpropanoids.lignin biosynthesis.PAL	highly similar to ( 729) AT3G10340 | Symbols: PAL4 | PAL4 (Phenylalanine ammonia-lyase 4); ammonia ligase/ ammonia-lyase/ catalytic | chr3:3204260-3207809 FORWARDhighly similar to ( 915) PAL1_ORYSA Phenylalanine ammonia-lyase (EC 4.3.1.5) - Oryza sativa (Rice)highly similar to ( 915) loc_os02g41630 12002.m33418 protein phenylalanine ammonia-lyase, putative, expressed seq=cds; coord=4:143377369..1…	2.41975	GO:0044424//intracellular part	GO:0016840	GO:0006575//cellular modified amino acid metabolic process;GO:0006558//L-phenylalanine metabolic process	gi|363543167|ref|NP_001241797.1|/0/phenylalanine ammonia-lyase [Zea mays]
GRMZM2G160683_T01	GRMZM2G160683		not assigned.unknown	seq=cds; coord=2:1563059..1564056:-1; parent_gene=GRMZM2G160683	1.34348	-	-	-	gi|259489826|ref|NP_001159107.1|/1.75864e-40/uncharacterized protein LOC100304180 precursor [Zea mays]
GRMZM2G160840_T01	GRMZM2G160840		RNA.regulation of transcription.MYB domain transcription factor family	moderately similar to ( 239) AT5G49620 | Symbols: AtMYB78 | AtMYB78 (myb domain protein 78); DNA binding / transcription factor | chr5:20137491-20139384 REVERSEweakly similar to ( 149) MYBA2_ORYSA Myb-related protein MYBAS2 - Oryza sativa (Rice)moderately similar to ( 291) loc_os12g37690 12012.m07555 protein MYB transcription factor, putative, expressed seq=cds; coord=3:127613323..127614912:-1; p…	1.17872	GO:0043231//intracellular membrane-bounded organelle	GO:0003676//nucleic acid binding	GO:0010468//regulation of gene expression	gi|293334135|ref|NP_001170329.1|/2.5062e-90/uncharacterized protein LOC100384300 [Zea mays]
GRMZM2G160924_T01	GRMZM2G160924		not assigned.unknown	moderately similar to ( 276) loc_os10g10320 12010.m04368 protein conserved hypothetical protein seq=cds; coord=4:190262956..190263824:-1; parent_gene=GRMZM2G160924	36.4843	-	-	-	gi|242070063|ref|XP_002450308.1|/1.45105e-113/hypothetical protein SORBIDRAFT_05g003520 [Sorghum bicolor]
GRMZM2G163883_T01	GRMZM2G163883		misc.beta 1,3 glucan hydrolases	weakly similar to ( 127) AT2G30933 | Symbols: | FUNCTIONS IN: molecular_function unknown; INVOLVED IN: biological_process unknown; LOCATED IN: endomembrane system; CONTAINS InterPro DOMAIN/s: X8 (InterPro:IPR012946); BEST Arabidopsis thaliana protein match is: glucan endo-1,3-beta-glucosidase-related (TAIR:AT1G09460.1); Has 762 Blast hits to 726 proteins in 32 species: Archae - 0; Bacteria - 0; M…	1.38925	-	-	-	gi|242091489|ref|XP_002441577.1|/1.54929e-70/hypothetical protein SORBIDRAFT_09g029700 [Sorghum bicolor]
GRMZM2G165042_T01	GRMZM2G165042		RNA.regulation of transcription.bHLH,Basic Helix-Loop-Helix family	weakly similar to ( 135) AT2G20180 | Symbols: PIL5, PIF1 | PIL5 (PHYTOCHROME INTERACTING FACTOR 3-LIKE 5); DNA binding / phytochrome binding / transcription factor | chr2:8704525-8706237 REVERSEmoderately similar to ( 440) loc_os03g43810 12003.m35328 protein PIL5, putative, expressed seq=cds; coord=1:252374241..252377817:-1; parent_gene=GRMZM2G165042	1.1863	-	-	-	gi|226493691|ref|NP_001147809.1|/0/PIL5 [Zea mays]
GRMZM2G166027_T01	GRMZM2G166027		protein.postranslational modification.kinase.receptor like cytoplasmatic kinase VII	moderately similar to ( 386) AT2G05940 | Symbols: | protein kinase, putative | chr2:2287514-2289270 REVERSEweakly similar to ( 184) NORK_PEA Nodulation receptor kinase precursor (EC 2.7.11.1) - Pisum sativum (Garden pea)highly similar to ( 504) loc_os02g53750 12002.m10404 protein protein kinase APK1A, chloroplast precursor, putative, expressed seq=cds; coord=5:211767490..211769674:-1; parent_gene…	2.55012	-	GO:0004672//protein kinase activity	-	gi|242066728|ref|XP_002454653.1|/7.08724e-164/hypothetical protein SORBIDRAFT_04g034840 [Sorghum bicolor]
GRMZM2G166616_T01	GRMZM2G166616		hormone metabolism.ethylene.synthesis-degradation	moderately similar to ( 402) AT1G77330 | Symbols: | 1-aminocyclopropane-1-carboxylate oxidase, putative / ACC oxidase, putative | chr1:29063215-29064447 REVERSEmoderately similar to ( 304) ACCO1_MALDO 1-aminocyclopropane-1-carboxylate oxidase 1 (EC 1.14.17.4) (ACC oxidase 1) (Ethylene-forming enzyme) (EFE) (Protein AP4) (PAE12) - Malus domestica (Apple) (Malus sylvestris)highly similar to ( 506) …	1.00585	-	GO:0043169//cation binding;GO:0019842//vitamin binding;GO:0016641//oxidoreductase activity, acting on the CH-NH2 group of donors, oxygen as acceptor	GO:0003006//developmental process involved in reproduction;GO:0006555//methionine metabolic process	gi|38607363|gb|AAR25561.1|/2.31026e-167/acc oxidase [Zea mays]
GRMZM2G166639_T01	GRMZM2G166639		hormone metabolism.ethylene.synthesis-degradation	moderately similar to ( 395) AT1G77330 | Symbols: | 1-aminocyclopropane-1-carboxylate oxidase, putative / ACC oxidase, putative | chr1:29063215-29064447 REVERSEmoderately similar to ( 303) ACCO1_MALDO 1-aminocyclopropane-1-carboxylate oxidase 1 (EC 1.14.17.4) (ACC oxidase 1) (Ethylene-forming enzyme) (EFE) (Protein AP4) (PAE12) - Malus domestica (Apple) (Malus sylvestris)highly similar to ( 501) …	3.71346	-	GO:0043169//cation binding;GO:0019842//vitamin binding;GO:0016641//oxidoreductase activity, acting on the CH-NH2 group of donors, oxygen as acceptor	GO:0003006//developmental process involved in reproduction;GO:0006555//methionine metabolic process	gi|38607363|gb|AAR25561.1|/5.86624e-176/acc oxidase [Zea mays]
GRMZM2G167072_T01	GRMZM2G167072		not assigned.unknown	seq=cds; coord=3:228877290..228880870:-1; parent_gene=GRMZM2G167072	1.4467	-	-	-	gi|259490709|ref|NP_001158914.1|/3.24555e-113/uncharacterized protein LOC100303812 precursor [Zea mays]
GRMZM2G167149_T01	GRMZM2G167149		misc.invertase/pectin methylesterase inhibitor family protein	moderately similar to ( 233) loc_os02g01310 12002.m05481 protein pectinesterase inhibitor domain containing protein, expressed seq=cds; coord=4:240618054..240619105:1; parent_gene=GRMZM2G167149	1.09245	-	GO:0004091//carboxylesterase activity;GO:0030234//enzyme regulator activity	-	gi|226509344|ref|NP_001148423.1|/6.87839e-89/LOC100282038 precursor [Zea mays]
GRMZM2G168603_T01	GRMZM2G168603		signalling.receptor kinases.leucine rich repeat XI	nearly identical (1078) AT4G28650 | Symbols: | leucine-rich repeat transmembrane protein kinase, putative | chr4:14144155-14147276 REVERSEmoderately similar to ( 470) RPK1_IPONI Receptor-like protein kinase precursor (EC 2.7.11.1) - Ipomoea nil (Japanese morning glory) (Pharbitis nil)nearly identical (1583) loc_os02g02140 12002.m05564 protein receptor protein kinase CLAVATA1 precursor, putative, …	1.1382	GO:0016020//membrane;GO:0031410//cytoplasmic vesicle	GO:0004672//protein kinase activity;GO:0032559	GO:0006464//cellular protein modification process	gi|242063736|ref|XP_002453157.1|/0/hypothetical protein SORBIDRAFT_04g000920 [Sorghum bicolor]
GRMZM2G168758_T01	GRMZM2G168758		not assigned.unknown	weakly similar to ( 197) AT5G16940 | Symbols: | carbon-sulfur lyase | chr5:5571797-5572204 REVERSEmoderately similar to ( 249) loc_os09g23370 12009.m21986 protein proline-rich polypeptide 6 isoform 1, putative, expressed seq=cds; coord=2:179232048..179232599:-1; parent_gene=GRMZM2G168758	1.38799	-	GO:0016829//lyase activity	-	gi|242049206|ref|XP_002462347.1|/4.04902e-72/hypothetical protein SORBIDRAFT_02g024170 [Sorghum bicolor]
GRMZM2G169064_T01	GRMZM2G169064		not assigned.unknown	seq=cds; coord=6:22144473..22146495:-1; parent_gene=GRMZM2G169064	1.37966	-	-	-	gi|259489922|ref|NP_001159254.1|/9.12687e-64/uncharacterized protein LOC100304344 [Zea mays]
GRMZM2G169149_T01	GRMZM2G169149		RNA.regulation of transcription.WRKY domain transcription factor family	weakly similar to ( 124) AT1G80840 | Symbols: WRKY40, ATWRKY40 | WRKY40; transcription factor | chr1:30383834-30385356 FORWARDweakly similar to ( 194) loc_os09g25070 12009.m22088 protein OsWRKY62 - Superfamily of rice TFs having WRKY and zinc finger domains, expressed seq=cds; coord=7:115548526..115549758:-1; parent_gene=GRMZM2G169149	2.27575	GO:0043231//intracellular membrane-bounded organelle	GO:0003677//DNA binding;GO:0001071//nucleic acid binding transcription factor activity	GO:0010468//regulation of gene expression	gi|226506524|ref|NP_001147635.1|/1.52157e-122/WRKY62 - superfamily of TFs having WRKY and zinc finger domains [Zea mays]
GRMZM2G169382_T01	GRMZM2G169382		RNA.regulation of transcription.AP2/EREBP, APETALA2/Ethylene-responsive element binding protein family	very weakly similar to (82.0) AT2G47520 | Symbols: | AP2 domain-containing transcription factor, putative | chr2:19502891-19503490 REVERSEweakly similar to ( 164) loc_os01g21120 12001.m08596 protein ethylene-responsive factor-like protein 1, putative, expressed seq=cds; coord=3:56324330..56325604:1; parent_gene=GRMZM2G169382	1.53098	-	-	-	gi|212722088|ref|NP_001131773.1|/1.945e-60/uncharacterized protein LOC100193143 [Zea mays]
GRMZM2G169704_T01	GRMZM2G169704		not assigned.unknown	moderately similar to ( 338) loc_os10g06680 12010.m04063 protein expressed protein seq=cds; coord=1:121398962..121400465:-1; parent_gene=GRMZM2G169704	1.27355	GO:0031410//cytoplasmic vesicle	GO:0030246//carbohydrate binding	-	gi|219363669|ref|NP_001136828.1|/1.18469e-138/uncharacterized protein LOC100216976 precursor [Zea mays]
GRMZM2G170099_T01	GRMZM2G170099		not assigned.unknown	weakly similar to ( 150) loc_os01g18810 12001.m08419 protein hypothetical protein seq=cds; coord=3:50602671..50604347:1; parent_gene=GRMZM2G170099	1.11218	-	-	-	gi|219362871|ref|NP_001136467.1|/7.59565e-173/uncharacterized protein LOC100216578 [Zea mays]
GRMZM2G171296_T01	GRMZM2G171296		not assigned.unknown	seq=cds; coord=2:43633707..43634200:-1; parent_gene=GRMZM2G171296	3.87738	-	-	-	gi|226507826|ref|NP_001142874.1|/9.81095e-15/uncharacterized protein LOC100275279 [Zea mays]
GRMZM2G171822_T01	GRMZM2G171822		protein.postranslational modification	moderately similar to ( 300) AT2G34650 | Symbols: PID, ABR | PID (PINOID); kinase/ protein kinase/ protein serine/threonine kinase | chr2:14589934-14591557 REVERSEmoderately similar to ( 263) KPK1_PHAVU Protein kinase PVPK-1 (EC 2.7.11.1) - Phaseolus vulgaris (Kidney bean) (French bean)moderately similar to ( 419) loc_os12g42020 12012.m07983 protein protein kinase PVPK-1, putative, expressed seq=…	1.28631	GO:0043231//intracellular membrane-bounded organelle	GO:0004672//protein kinase activity;GO:0005515//protein binding	GO:0060918//auxin transport;GO:0048588//developmental cell growth;GO:0009755//hormone-mediated signaling pathway;GO:0009630//gravitropism;GO:0009793//embryo development ending in seed dormancy;GO:0000904//cell morphogenesis involved in differentiation	gi|162462776|ref|NP_001106051.1|/3.45396e-155/barren inflorescence2 [Zea mays]
GRMZM2G171996_T01	GRMZM2G171996		not assigned.unknown	seq=cds; coord=8:164736149..164736823:-1; parent_gene=GRMZM2G171996	1.98637	-	-	-	-
GRMZM2G172158_T01	GRMZM2G172158		not assigned.unknown	moderately similar to ( 296) AT5G48040 | Symbols: | ubiquitin thiolesterase | chr5:19470461-19471729 FORWARDhighly similar to ( 549) loc_os02g32540 12002.m08347 protein expressed protein seq=cds; coord=5:167947525..167949495:1; parent_gene=GRMZM2G172158	1.03537	GO:0043231//intracellular membrane-bounded organelle	-	-	gi|226528176|ref|NP_001143796.1|/0/uncharacterized protein LOC100276565 [Zea mays]
GRMZM2G172368_T01	GRMZM2G172368		signalling.receptor kinases.DUF 26	moderately similar to ( 223) AT1G66980 | Symbols: | protein kinase family protein / glycerophosphoryl diester phosphodiesterase family protein | chr1:24997491-25001961 REVERSEweakly similar to ( 111) KPRO_MAIZE Putative receptor protein kinase ZmPK1 precursor (EC 2.7.11.1) - Zea mays (Maize)moderately similar to ( 433) loc_os01g04490 12001.m07084 protein Ser/Thr protein kinase, putative, expresse…	1.22784	-	-	-	gi|326526427|dbj|BAJ97230.1|/1.45547e-136/predicted protein [Hordeum vulgare subsp. vulgare]
GRMZM2G172442_T02	GRMZM2G172442		not assigned.unknown	seq=cds; coord=2:200895237..200906457:-1; parent_gene=GRMZM2G172442	3.41363	-	-	-	gi|357122731|ref|XP_003563068.1|/1.55402e-10/PREDICTED: uncharacterized protein LOC100836427 [Brachypodium distachyon]
GRMZM2G173105_T01	GRMZM2G173105		misc.nitrilases, *nitrile lyases, berberine bridge enzymes, reticuline oxidases, troponine reductases	moderately similar to ( 358) AT5G44400 | Symbols: | FAD-binding domain-containing protein | chr5:17886365-17888071 REVERSEhighly similar to ( 615) loc_os11g30310 12011.m06940 protein reticuline oxidase precursor, putative seq=cds; coord=4:17740852..17742683:-1; parent_gene=GRMZM2G173105	7.63243	GO:0031410//cytoplasmic vesicle	-	-	gi|326488995|dbj|BAJ98109.1|/1.59582e-180/predicted protein [Hordeum vulgare subsp. vulgare]
GRMZM2G174855_T01	GRMZM2G174855		cell wall.modification	moderately similar to ( 359) AT1G11545 | Symbols: | xyloglucan:xyloglucosyl transferase, putative / xyloglucan endotransglycosylase, putative / endo-xyloglucan transferase, putative | chr1:3878689-3880286 REVERSEmoderately similar to ( 258) XTH_TOBAC Probable xyloglucan endotransglucosylase/hydrolase protein precursor (EC 2.4.1.207) - Nicotiana tabacum (Common tobacco)moderately similar to ( 457)…	2.69968	GO:0005576//extracellular region;GO:0031410//cytoplasmic vesicle;GO:0030312//external encapsulating structure	GO:0016798//hydrolase activity, acting on glycosyl bonds;GO:0016758//transferase activity, transferring hexosyl groups	GO:0044042//glucan metabolic process	gi|293335747|ref|NP_001168075.1|/8.94504e-149/uncharacterized protein LOC100381808 precursor [Zea mays]
GRMZM2G174855_T03	GRMZM2G174855		cell wall.modification	very weakly similar to (97.8) AT1G11545 | Symbols: | xyloglucan:xyloglucosyl transferase, putative / xyloglucan endotransglycosylase, putative / endo-xyloglucan transferase, putative | chr1:3878689-3880286 REVERSEweakly similar to ( 136) loc_os07g34580 12007.m07715 protein xyloglucan endotransglucosylase/hydrolase protein 8 precursor, putative, expressed seq=cds; coord=7:154254595..154255511:1; p…	1.13071	GO:0005576//extracellular region;GO:0031410//cytoplasmic vesicle;GO:0030312//external encapsulating structure	GO:0016798//hydrolase activity, acting on glycosyl bonds;GO:0016758//transferase activity, transferring hexosyl groups	GO:0044042//glucan metabolic process	gi|293335747|ref|NP_001168075.1|/3.06083e-71/uncharacterized protein LOC100381808 precursor [Zea mays]
GRMZM2G174860_T01	GRMZM2G174860		lipid metabolism.lipid degradation.lipases.triacylglycerol lipase	moderately similar to ( 375) AT4G16820 | Symbols: | lipase class 3 family protein | chr4:9467563-9469116 FORWARDhighly similar to ( 635) loc_os08g04800 12008.m04623 protein triacylglycerol lipase like protein, putative, expressed seq=cds; coord=4:34996783..34998381:-1; parent_gene=GRMZM2G174860	5.27071	GO:0043231//intracellular membrane-bounded organelle	GO:0004091//carboxylesterase activity	GO:0044238//primary metabolic process	gi|242078145|ref|XP_002443841.1|/0/hypothetical protein SORBIDRAFT_07g003150 [Sorghum bicolor]
GRMZM2G175164_T01	GRMZM2G175164		protein.postranslational modification.kinase.receptor like cytoplasmatic kinase VII	moderately similar to ( 449) AT2G05940 | Symbols: | protein kinase, putative | chr2:2287514-2289270 REVERSEmoderately similar to ( 213) NORK_PEA Nodulation receptor kinase precursor (EC 2.7.11.1) - Pisum sativum (Garden pea)highly similar to ( 564) loc_os03g08170 12003.m06326 protein protein kinase APK1B, chloroplast precursor, putative, expressed seq=cds; coord=1:16468414..16473940:1; parent_gen…	2.26614	GO:0043231//intracellular membrane-bounded organelle	GO:0004672//protein kinase activity;GO:0032559	GO:0006464//cellular protein modification process	gi|115451111|ref|NP_001049156.1|/1.49152e-159/Os03g0179400 [Oryza sativa Japonica Group]
GRMZM2G175574_T02	GRMZM2G175574		not assigned.unknown	weakly similar to ( 103) loc_os08g38010 12008.m07786 protein expressed protein seq=cds; coord=1:182622677..182625382:1; parent_gene=GRMZM2G175574	1.28898	GO:0043231//intracellular membrane-bounded organelle	-	-	gi|293333620|ref|NP_001167706.1|/2.03158e-61/uncharacterized protein LOC100381393 [Zea mays]
GRMZM2G175927_T01	GRMZM2G175927		RNA.regulation of transcription.unclassified	moderately similar to ( 243) AT2G03200 | Symbols: | aspartyl protease family protein | chr2:966506-967891 REVERSEmoderately similar to ( 464) loc_os07g34940 12007.m07750 protein aspartic proteinase nepenthesin-1 precursor, putative, expressed seq=cds; coord=2:203944178..203945774:-1; parent_gene=GRMZM2G175927	13.5531	GO:0031410//cytoplasmic vesicle	GO:0008233//peptidase activity	-	gi|226508202|ref|NP_001141111.1|/0/uncharacterized protein LOC100273195 precursor [Zea mays]
GRMZM2G176568_T01	GRMZM2G176568		RNA.regulation of transcription.MYB-related transcription factor family	weakly similar to ( 143) AT5G58900 | Symbols: | myb family transcription factor | chr5:23783275-23784667 REVERSEweakly similar to ( 159) loc_os01g04930 12001.m07127 protein MYB-like transcription factor DIVARICATA, putative, expressed seq=cds; coord=8:13790035..13790848:-1; parent_gene=GRMZM2G176568	1.12177	GO:0043231//intracellular membrane-bounded organelle	GO:0003676//nucleic acid binding	GO:0010468//regulation of gene expression	gi|218187494|gb|EEC69921.1|/1.29236e-40/hypothetical protein OsI_00344 [Oryza sativa Indica Group]
GRMZM2G179550_T01	GRMZM2G179550		not assigned.unknown	seq=cds; coord=6:103680950..103682836:1; parent_gene=GRMZM2G179550	6.56915	-	-	-	-
GRMZM2G179768_T01	GRMZM2G179768		protein.degradation.metalloprotease	moderately similar to ( 227) AT1G70170 | Symbols: MMP | MMP (MATRIX METALLOPROTEINASE); metalloendopeptidase/ metallopeptidase | chr1:26424005-26425141 FORWARDweakly similar to ( 174) MEP1_SOYBN Metalloendoproteinase 1 precursor (EC 3.4.24.-) (SMEP1) - Glycine max (Soybean)moderately similar to ( 334) loc_os02g50730 12002.m10107 protein metalloendoproteinase 1 precursor, putative, expressed seq=c…	1.56106	GO:0044421//extracellular region part;GO:0031410//cytoplasmic vesicle	GO:0004175//endopeptidase activity;GO:0046914//transition metal ion binding	GO:0019538//protein metabolic process	gi|226499088|ref|NP_001151749.1|/2.63792e-160/metalloendoproteinase 1 precursor [Zea mays]
GRMZM2G180324_T01	GRMZM2G180324		not assigned.unknown	moderately similar to ( 248) AT1G14590 | Symbols: | FUNCTIONS IN: molecular_function unknown; INVOLVED IN: biological_process unknown; LOCATED IN: chloroplast thylakoid lumen; CONTAINS InterPro DOMAIN/s: Nucleotide-diphospho-sugar transferase, predicted (InterPro:IPR005069); BEST Arabidopsis thaliana protein match is: unknown protein (TAIR:AT2G02061.1); Has 179 Blast hits to 175 proteins in 14 sp…	2.55984	GO:0031410//cytoplasmic vesicle	-	-	gi|223942815|gb|ACN25491.1|/0/unknown [Zea mays]
GRMZM2G300141_T01	GRMZM2G300141		misc.invertase/pectin methylesterase inhibitor family protein	weakly similar to ( 124) loc_os12g18560 12012.m05810 protein c/VIF2, putative, expressed seq=cds; coord=4:39775453..39776283:1; parent_gene=GRMZM2G300141	1.61348	GO:0031410//cytoplasmic vesicle	GO:0030234//enzyme regulator activity;GO:0004091//carboxylesterase activity	-	gi|242080229|ref|XP_002444883.1|/2.94438e-30/hypothetical protein SORBIDRAFT_07g000850 [Sorghum bicolor]
GRMZM2G303091_T01	GRMZM2G303091		not assigned.unknown	seq=cds; coord=4:235688568..235689431:-1; parent_gene=GRMZM2G303091	1.77354	GO:0031410//cytoplasmic vesicle	-	-	gi|195608530|gb|ACG26095.1|/6.75161e-17/hypothetical protein [Zea mays]
GRMZM2G303509_T01	GRMZM2G303509		not assigned.unknown	seq=cds; coord=5:205386537..205387092:1; parent_gene=GRMZM2G303509	7.92352	-	-	-	gi|242066058|ref|XP_002454318.1|/1.58681e-15/hypothetical protein SORBIDRAFT_04g028580 [Sorghum bicolor]
GRMZM2G304528_T01	GRMZM2G304528		not assigned.unknown	weakly similar to ( 158) loc_os06g03810 12006.m05112 protein expressed protein seq=cds; coord=9:24547579..24548244:1; parent_gene=GRMZM2G304528	2.58841	-	-	-	gi|242094506|ref|XP_002437743.1|/5.33394e-52/hypothetical protein SORBIDRAFT_10g001770 [Sorghum bicolor]
GRMZM2G308351_T01	GRMZM2G308351		misc.short chain dehydrogenase/reductase (SDR)	moderately similar to ( 281) AT3G51680 | Symbols: | short-chain dehydrogenase/reductase (SDR) family protein | chr3:19173622-19174667 REVERSEmoderately similar to ( 493) TS2_MAIZE Sex determination protein tasselseed-2 - Zea mays (Maize)moderately similar to ( 426) loc_os03g18740 12003.m07295 protein sex determination protein tasselseed-2, putative, expressed seq=cds; coord=9:136887899..136889026…	4.42317	-	GO:0003824//catalytic activity	GO:0008152//metabolic process;GO:0032501//multicellular organismal process	gi|1877480|gb|AAB57737.1|/1.22641e-140/short-chain alcohol dehydrogenase [Tripsacum dactyloides]
GRMZM2G308910_T01	GRMZM2G308910		not assigned.unknown	seq=cds; coord=3:7981422..7982286:-1; parent_gene=GRMZM2G308910	3.10011	-	-	-	gi|242056127|ref|XP_002457209.1|/7.24039e-27/hypothetical protein SORBIDRAFT_03g003330 [Sorghum bicolor]
GRMZM2G309071_T01	GRMZM2G309071		not assigned.unknown	moderately similar to ( 246) loc_os01g51640 12001.m11342 protein expressed protein seq=cds; coord=6:137492142..137494245:-1; parent_gene=GRMZM2G309071	5.6336	-	-	-	gi|242058505|ref|XP_002458398.1|/1.91513e-79/hypothetical protein SORBIDRAFT_03g032780 [Sorghum bicolor]
GRMZM2G309944_T01	GRMZM2G309944		not assigned.unknown	moderately similar to ( 208) loc_os05g20570 12005.m06455 protein pectinesterase inhibitor domain containing protein, expressed seq=cds; coord=8:91992713..91993273:-1; parent_gene=GRMZM2G309944	1.02429	GO:0031410//cytoplasmic vesicle	GO:0030234//enzyme regulator activity;GO:0004091//carboxylesterase activity	-	gi|293337177|ref|NP_001167964.1|/2.44358e-72/uncharacterized protein LOC100381680 [Zea mays]
GRMZM2G310453_T01	GRMZM2G310453		not assigned.unknown	seq=cds; coord=10:84158573..84160338:1; parent_gene=GRMZM2G310453	1.2649	-	-	-	gi|226507424|ref|NP_001144159.1|/4.20015e-94/uncharacterized protein LOC100277014 [Zea mays]
GRMZM2G311347_T01	GRMZM2G311347		not assigned.unknown	seq=cds; coord=3:201250659..201251726:1; parent_gene=GRMZM2G311347	3.0489	-	-	-	gi|293331735|ref|NP_001168567.1|/6.08944e-24/uncharacterized protein LOC100382350 [Zea mays]
GRMZM2G313104_T01	GRMZM2G313104		not assigned.unknown	seq=cds; coord=1:72040893..72042056:-1; parent_gene=GRMZM2G313104	8.88599	-	-	-	gi|242035489|ref|XP_002465139.1|/6.20377e-33/hypothetical protein SORBIDRAFT_01g032640 [Sorghum bicolor]
GRMZM2G314712_T01	GRMZM2G314712		N-metabolism.nitrate metabolism.NR	very weakly similar to (88.6) NIA7_HORVU Nitrate reductase [NAD(P)H] (EC 1.7.1.2) - Hordeum vulgare (Barley)very weakly similar to (90.5) loc_os02g53130 12002.m10342 protein nitrate reductase, putative, expressed seq=cds; coord=8:83928144..83929563:1; parent_gene=GRMZM2G314712	1.02273	-	GO:0046914//transition metal ion binding;GO:0016491//oxidoreductase activity	GO:0006091//generation of precursor metabolites and energy	gi|242079443|ref|XP_002444490.1|/7.02746e-26/hypothetical protein SORBIDRAFT_07g022750 [Sorghum bicolor]
GRMZM2G314946_T01	GRMZM2G314946		stress.biotic	weakly similar to ( 114) AT4G31470 | Symbols: | pathogenesis-related protein, putative | chr4:15261746-15262303 REVERSEweakly similar to ( 104) PR13_HORVU Pathogenesis-related protein PRB1-3 precursor (PR-1B) (HV-8) - Hordeum vulgare (Barley)weakly similar to ( 173) loc_os02g54570 12002.m10486 protein pathogenesis-related protein PRMS precursor, putative, expressed seq=cds; coord=4:175331593..175…	1.93757	GO:0044464//cell part	-	-	gi|242066766|ref|XP_002454672.1|/3.59212e-62/hypothetical protein SORBIDRAFT_04g035340 [Sorghum bicolor]
GRMZM2G315401_T01	GRMZM2G315401		minor CHO metabolism.others	moderately similar to ( 313) AT3G47800 | Symbols: | aldose 1-epimerase family protein | chr3:17634971-17636998 FORWARDhighly similar to ( 541) loc_os04g38540 12004.m08844 protein aldose 1-epimerase, putative, expressed seq=cds; coord=2:42364936..42367545:-1; parent_gene=GRMZM2G315401	3.29195	GO:0031410//cytoplasmic vesicle	GO:0003824//catalytic activity;GO:0005488//binding	GO:0005996//monosaccharide metabolic process	gi|293331181|ref|NP_001169236.1|/0/uncharacterized protein LOC100383094 precursor [Zea mays]
GRMZM2G318526_T01	GRMZM2G318526		not assigned.unknown	seq=cds; coord=3:223987758..223988286:1; parent_gene=GRMZM2G318526	1.08625	-	-	-	-
GRMZM2G318652_T01	GRMZM2G318652		not assigned.unknown	seq=cds; coord=1:51894857..51895988:1; parent_gene=GRMZM2G318652	2.19969	-	-	-	gi|242041113|ref|XP_002467951.1|/4.1357e-18/hypothetical protein SORBIDRAFT_01g037040 [Sorghum bicolor]
GRMZM2G319375_T01	GRMZM2G319375		stress.biotic.PR-proteins	weakly similar to ( 149) AT1G61105 | Symbols: | disease resistance protein-related | chr1:22513616-22514492 REVERSEmoderately similar to ( 208) loc_os07g37950 12007.m08044 protein transmembrane receptor, putative, expressed seq=cds; coord=2:205844079..205845000:-1; parent_gene=GRMZM2G319375	1.08216	GO:0043231//intracellular membrane-bounded organelle;GO:0044425//membrane part	GO:0004872//receptor activity	GO:0006952//defense response;GO:0023060	gi|242050592|ref|XP_002463040.1|/3.18306e-85/hypothetical protein SORBIDRAFT_02g036630 [Sorghum bicolor]
GRMZM2G321394_T01	GRMZM2G321394		not assigned.unknown	moderately similar to ( 396) AT3G11570 | Symbols: | unknown protein | chr3:3645540-3647328 REVERSEmoderately similar to ( 320) loc_os11g05080 12011.m04706 protein expressed protein seq=cds; coord=2:3772179..3773806:1; parent_gene=GRMZM2G321394	8.26802	-	-	-	gi|222640225|gb|EEE68357.1|/3.61449e-159/hypothetical protein OsJ_26660 [Oryza sativa Japonica Group]
GRMZM2G321870_T01	GRMZM2G321870		cell wall.pectin*esterases.PME	highly similar to ( 516) AT3G05610 | Symbols: | pectinesterase family protein | chr3:1625876-1627976 REVERSEmoderately similar to ( 372) PME3_PHAVU Pectinesterase-3 precursor (EC 3.1.1.11) (Pectin methylesterase 3) (PE 3) - Phaseolus vulgaris (Kidney bean) (French bean)highly similar to ( 875) loc_os03g18860 12003.m07306 protein pectinesterase U1 precursor, putative, expressed seq=cds; coord=1:47…	4.60755	GO:0030312//external encapsulating structure;GO:0031410//cytoplasmic vesicle	GO:0030234//enzyme regulator activity;GO:0004091//carboxylesterase activity	GO:0071555//cell wall organization	gi|242036003|ref|XP_002465396.1|/0/hypothetical protein SORBIDRAFT_01g037900 [Sorghum bicolor]
GRMZM2G323938_T01	GRMZM2G323938		not assigned.unknown	weakly similar to ( 119) loc_os05g40030 12005.m08180 protein hypothetical protein seq=cds; coord=6:154151654..154152157:-1; parent_gene=GRMZM2G323938	1.14013	-	-	-	gi|242090863|ref|XP_002441264.1|/3.61648e-39/hypothetical protein SORBIDRAFT_09g023460 [Sorghum bicolor]
GRMZM2G325683_T01	GRMZM2G325683		not assigned.unknown	seq=cds; coord=5:176870667..176871296:1; parent_gene=GRMZM2G325683	2.43229	-	-	-	gi|226492882|ref|NP_001143505.1|/2.30468e-38/uncharacterized protein LOC100276188 [Zea mays]
GRMZM2G325693_T01	GRMZM2G325693		not assigned.unknown	seq=cds; coord=5:176876092..176877189:1; parent_gene=GRMZM2G325693	1.04668	-	-	-	gi|293336186|ref|NP_001170275.1|/1.114e-28/uncharacterized protein LOC100384236 [Zea mays]
GRMZM2G328197_T01	GRMZM2G328197		RNA.regulation of transcription.AP2/EREBP, APETALA2/Ethylene-responsive element binding protein family	weakly similar to ( 106) AT1G50640 | Symbols: ERF3, ATERF3 | ERF3 (ETHYLENE RESPONSIVE ELEMENT BINDING FACTOR 3); DNA binding / protein binding / transcription factor/ transcription repressor | chr1:18757602-18758279 REVERSEweakly similar to ( 104) ERF4_TOBAC Ethylene-responsive transcription factor 4 (Ethylene-responsive element-binding factor 4 homolog) (EREBP-3) (NtERF3) - Nicotiana tabacum (C…	2.3696	-	-	GO:0010468//regulation of gene expression;GO:0006350	gi|55296061|dbj|BAD67623.1|/2.13996e-25/putative TSI1 [Oryza sativa Japonica Group]
GRMZM2G328205_T01	GRMZM2G328205		not assigned.unknown	weakly similar to ( 107) AT3G12410 | Symbols: | 3-5 exonuclease/ nucleic acid binding | chr3:3946267-3946959 REVERSEmoderately similar to ( 276) loc_os01g19430 12001.m08480 protein Werner syndrome ATP-dependent helicase, putative, expressed seq=cds; coord=8:37640069..37640828:1; parent_gene=GRMZM2G328205	4.2845	GO:0044464//cell part	GO:0005488//binding;GO:0004527//exonuclease activity	GO:0034641//cellular nitrogen compound metabolic process	gi|242057157|ref|XP_002457724.1|/6.3615e-82/hypothetical protein SORBIDRAFT_03g012385 [Sorghum bicolor]
GRMZM2G329195_T01	GRMZM2G329195		protein.degradation.ubiquitin.E3.RING	weakly similar to ( 141) AT5G27420 | Symbols: | zinc finger (C3HC4-type RING finger) family protein | chr5:9684119-9685225 FORWARDmoderately similar to ( 390) loc_os06g11450 12006.m05862 protein RING-H2 finger protein ATL3B precursor, putative, expressed seq=cds; coord=6:111237313..111238646:1; parent_gene=GRMZM2G329195	2.01019	-	GO:0005488//binding	-	gi|242095138|ref|XP_002438059.1|/2.58408e-126/hypothetical protein SORBIDRAFT_10g007490 [Sorghum bicolor]
GRMZM2G329584_T01	GRMZM2G329584		not assigned.unknown	seq=cds; coord=9:96703999..96704853:-1; parent_gene=GRMZM2G329584	1.34416	-	-	-	gi|242093670|ref|XP_002437325.1|/1.47676e-16/hypothetical protein SORBIDRAFT_10g024920 [Sorghum bicolor]
GRMZM2G332505_T02	GRMZM2G332505		transport.amino acids	highly similar to ( 625) AT1G77380 | Symbols: AAP3, ATAAP3 | AAP3; amino acid transmembrane transporter | chr1:29075201-29077252 REVERSEhighly similar to ( 747) loc_os11g09020 12011.m05099 protein amino acid carrier, putative, expressed seq=cds; coord=4:211995748..211998078:-1; parent_gene=GRMZM2G332505	1.9437	GO:0031224//intrinsic to membrane	-	-	gi|242067795|ref|XP_002449174.1|/0/hypothetical protein SORBIDRAFT_05g006010 [Sorghum bicolor]
GRMZM2G333079_T01	GRMZM2G333079		not assigned.unknown	seq=cds; coord=8:111287695..111290414:-1; parent_gene=GRMZM2G333079	4.10767	-	-	-	gi|242089951|ref|XP_002440808.1|/5.69519e-116/hypothetical protein SORBIDRAFT_09g007187 [Sorghum bicolor]
GRMZM2G333478_T01	GRMZM2G333478		misc.oxidases - copper, flavone etc.	moderately similar to ( 473) AT5G43890 | Symbols: YUC5, SUPER1 | YUCCA5; monooxygenase | chr5:17648857-17650131 REVERSEhighly similar to ( 613) loc_os07g25540 12007.m06832 protein disulfide oxidoreductase/ monooxygenase/ oxidoreductase, putative, expressed seq=cds; coord=2:169364011..169365516:1; parent_gene=GRMZM2G333478	1.14468	-	GO:0030554//adenyl nucleotide binding;GO:0016709//oxidoreductase activity, acting on paired donors, with incorporation or reduction of molecular oxygen, NADH or NADPH as one donor, and incorporation of one atom of oxygen	GO:0008152//metabolic process	gi|226529272|ref|NP_001148256.1|/0/disulfide oxidoreductase/ monooxygenase/ oxidoreductase [Zea mays]
GRMZM2G334660_T01	GRMZM2G334660		secondary metabolism.phenylpropanoids.lignin biosynthesis.PAL	nearly identical (1058) AT2G37040 | Symbols: pal1, ATPAL1 | pal1 (Phe ammonia lyase 1); phenylalanine ammonia-lyase | chr2:15557602-15560237 REVERSEnearly identical (1301) PAL2_ORYSA Phenylalanine ammonia-lyase (EC 4.3.1.5) - Oryza sativa (Rice)nearly identical (1308) loc_os02g41670 12002.m09203 protein phenylalanine ammonia-lyase, putative, expressed seq=cds; coord=5:186732964..186735665:-1; par…	189.487	GO:0044424//intracellular part	GO:0016841//ammonia-lyase activity	GO:0006575//cellular modified amino acid metabolic process;GO:0006558//L-phenylalanine metabolic process	gi|293332887|ref|NP_001168086.1|/0/uncharacterized protein LOC100381820 [Zea mays]
GRMZM2G335685_T01	GRMZM2G335685		development.unspecified	very weakly similar to (80.1) loc_os02g46210 12002.m09658 protein expressed protein seq=cds; coord=5:197778369..197779124:-1; parent_gene=GRMZM2G335685	1.01345	-	-	-	gi|226493681|ref|NP_001145606.1|/9.17463e-33/uncharacterized protein LOC100279084 [Zea mays]
GRMZM2G335815_T01	GRMZM2G335815		not assigned.unknown	weakly similar to ( 131) loc_os10g02790 12010.m03696 protein transposon protein, putative, Mariner sub-class seq=cds; coord=3:194230587..194231273:1; parent_gene=GRMZM2G335815	3.79292	-	-	-	gi|222612347|gb|EEE50479.1|/6.23447e-30/hypothetical protein OsJ_30540 [Oryza sativa Japonica Group]
GRMZM2G336337_T01	GRMZM2G336337		secondary metabolism.simple phenols	highly similar to ( 769) AT5G05390 | Symbols: LAC12 | LAC12 (laccase 12); laccase | chr5:1594753-1597042 FORWARDmoderately similar to ( 214) ASO_CUCSA L-ascorbate oxidase precursor (EC 1.10.3.3) (Ascorbase) (ASO) - Cucumis sativus (Cucumber)highly similar to ( 974) loc_os01g61160 12001.m12243 protein L-ascorbate oxidase precursor, putative, expressed seq=cds; coord=8:170035152..170037679:-1; pare…	3.73195	GO:0005576//extracellular region;GO:0031410//cytoplasmic vesicle	GO:0046914//transition metal ion binding;GO:0016682//oxidoreductase activity, acting on diphenols and related substances as donors, oxygen as acceptor	GO:0009808//lignin metabolic process	gi|308081989|ref|NP_001183899.1|/0/uncharacterized protein LOC100502492 precursor [Zea mays]
GRMZM2G336557_T01	GRMZM2G336557		not assigned.unknown	weakly similar to ( 149) AT2G39370 | Symbols: | unknown protein | chr2:16444280-16445266 REVERSEmoderately similar to ( 419) loc_os01g61980 12001.m12321 protein expressed protein seq=cds; coord=8:169191127..169192661:-1; parent_gene=GRMZM2G336557	1.24783	-	-	-	gi|226506718|ref|NP_001141805.1|/0/uncharacterized protein LOC100273942 [Zea mays]
GRMZM2G337229_T01	GRMZM2G337229		lipid metabolism.TAG synthesis	weakly similar to ( 131) AT4G25140 | Symbols: OLEO1, OLE1 | OLEO1 (OLEOSIN 1) | chr4:12900498-12901259 FORWARDmoderately similar to ( 214) OLEO1_MAIZE Oleosin Zm-I (Oleosin 16 kDa) (Lipid body-associated major protein) (Lipid body-associated protein L3) - Zea mays (Maize)weakly similar to ( 187) loc_os04g46200 12004.m09571 protein oleosin 16 kDa, putative, expressed seq=cds; coord=2:20765568..207…	1.34618	GO:0031224//intrinsic to membrane;GO:0005811//lipid particle	-	-	gi|195658177|gb|ACG48556.1|/4.86688e-89/oleosin 16 kDa [Zea mays]
GRMZM2G337768_T01	GRMZM2G337768		misc.myrosinases-lectin-jacalin	highly similar to ( 601) AT2G37710 | Symbols: RLK | RLK (receptor lectin kinase); kinase | chr2:15814934-15816961 REVERSEweakly similar to ( 157) PSKR_DAUCA Phytosulfokine receptor precursor (EC 2.7.11.1) (Phytosulfokine LRR receptor kinase) - Daucus carota (Carrot)highly similar to ( 916) loc_os07g03900 12007.m04860 protein lectin-like receptor kinase 7, putative seq=cds; coord=6:120450834..1204…	2.42883	GO:0031410//cytoplasmic vesicle	GO:0004672//protein kinase activity;GO:0032559	GO:0006464//cellular protein modification process	gi|293334355|ref|NP_001168373.1|/0/uncharacterized protein LOC100382142 precursor [Zea mays]
GRMZM2G338056_T01	GRMZM2G338056		RNA.regulation of transcription.C2H2 zinc finger family	very weakly similar to (81.6) loc_os11g47630 12011.m08563 protein zinc finger DNA-binding protein, putative, expressed seq=cds; coord=9:16478702..16479264:1; parent_gene=GRMZM2G338056	6.80435	-	-	-	gi|242072063|ref|XP_002451308.1|/7.56709e-21/hypothetical protein SORBIDRAFT_05g027450 [Sorghum bicolor]
GRMZM2G338465_T01	GRMZM2G338465		misc.UDP glucosyl and glucoronyl transferases	moderately similar to ( 385) AT2G36800 | Symbols: DOGT1, UGT73C5 | DOGT1 (DON-GLUCOSYLTRANSFERASE 1); UDP-glycosyltransferase/ cis-zeatin O-beta-D-glucosyltransferase/ glucosyltransferase/ quercetin 4-O-glucosyltransferase/ quercetin 7-O-glucosyltransferase/ trans-zeatin O-beta-D-glucosyltransferase/ transferase, transf | chr2:15423493-15424980 REVERSEweakly similar to ( 190) CZOG_SORBI Putative …	6.73823	-	GO:0016757//transferase activity, transferring glycosyl groups	-	gi|226508876|ref|NP_001148195.1|/0/cytokinin-O-glucosyltransferase 3 precursor [Zea mays]
GRMZM2G339452_T01	GRMZM2G339452		not assigned.unknown	very weakly similar to (93.6) loc_os06g49650 12006.m09489 protein harpin-induced protein, putative, expressed seq=cds; coord=1:268434804..268436788:1; parent_gene=GRMZM2G339452	2.36472	GO:0043231//intracellular membrane-bounded organelle	-	-	gi|242080695|ref|XP_002445116.1|/2.73578e-61/hypothetical protein SORBIDRAFT_07g004360 [Sorghum bicolor]
GRMZM2G340313_T01	GRMZM2G340313		signalling.calcium	very weakly similar to (94.0) AT3G50770 | Symbols: | calmodulin-related protein, putative | chr3:18873987-18874604 FORWARDweakly similar to ( 167) loc_os01g72550 12001.m13290 protein calmodulin-like protein 41, putative seq=cds; coord=8:157687641..157688096:-1; parent_gene=GRMZM2G340313	1.6802	-	GO:0046872//metal ion binding	-	gi|242055613|ref|XP_002456952.1|/2.06241e-47/hypothetical protein SORBIDRAFT_03g046230 [Sorghum bicolor]
GRMZM2G341309_T01	GRMZM2G341309		not assigned.unknown	weakly similar to ( 142) loc_os03g15080 12003.m06945 protein expressed protein seq=cds; coord=1:35768410..35771730:1; parent_gene=GRMZM2G341309	9.44349	GO:0044464//cell part	-	-	gi|242041535|ref|XP_002468162.1|/2.0117e-75/hypothetical protein SORBIDRAFT_01g040710 [Sorghum bicolor]
GRMZM2G344339_T01	GRMZM2G344339		not assigned.unknown	seq=cds; coord=3:140462153..140463390:1; parent_gene=GRMZM2G344339	1.31194	-	-	-	gi|226496537|ref|NP_001145474.1|/2.44883e-29/uncharacterized protein LOC100278865 [Zea mays]
GRMZM2G345700_T01	GRMZM2G345700		misc.protease inhibitor/seed storage/lipid transfer protein (LTP) family protein	weakly similar to ( 112) AT3G22142 | Symbols: | structural constituent of cell wall | chr3:7803604-7808046 REVERSEvery weakly similar to (95.5) 14KD_DAUCA 14 kDa proline-rich protein DC2.15 precursor - Daucus carota (Carrot)weakly similar to ( 170) loc_os04g52260 12004.m10121 protein 36.4 kDa proline-rich protein, putative, expressed seq=cds; coord=2:10539346..10540455:-1; parent_gene=GRMZM2G3457…	1.03537	-	-	GO:0006810//transport	gi|195611136|gb|ACG27398.1|/6.18541e-43/36.4 kDa proline-rich protein [Zea mays]
GRMZM2G346837_T01	GRMZM2G346837		not assigned.unknown	weakly similar to ( 147) loc_os02g33600 12002.m08453 protein VQ motif family protein, expressed seq=cds; coord=5:170825684..170827402:-1; parent_gene=GRMZM2G346837	3.00852	-	-	-	gi|293334815|ref|NP_001170183.1|/2.41815e-82/uncharacterized protein LOC100384130 [Zea mays]
GRMZM2G353497_T01	GRMZM2G353497		not assigned.unknown	seq=cds; coord=1:260338892..260340503:1; parent_gene=GRMZM2G353497	1.18823	-	-	-	gi|259490054|ref|NP_001159142.1|/1.51083e-54/uncharacterized protein LOC100304221 [Zea mays]
GRMZM2G354093_T01	GRMZM2G354093		not assigned.unknown	moderately similar to ( 206) AT5G63100 | Symbols: | unknown protein | chr5:25314434-25315423 REVERSEmoderately similar to ( 345) loc_os02g28820 12002.m08026 protein expressed protein seq=cds; coord=5:76634761..76635708:1; parent_gene=GRMZM2G354093	2.02049	-	-	-	gi|226508530|ref|NP_001143257.1|/5.43141e-143/uncharacterized protein LOC100275786 [Zea mays]
GRMZM2G354190_T01	GRMZM2G354190		not assigned.unknown	seq=cds; coord=9:98943749..98944818:-1; parent_gene=GRMZM2G354190	1.07407	-	-	-	gi|226508212|ref|NP_001151363.1|/6.03321e-56/TMV response-related protein [Zea mays]
GRMZM2G356895_T01	GRMZM2G356895		protein.degradation.ubiquitin.E3.RING	weakly similar to ( 118) AT2G46160 | Symbols: | zinc finger (C3HC4-type RING finger) family protein | chr2:18963109-18963753 FORWARDweakly similar to ( 186) loc_os01g53500 12001.m11517 protein RING-H2 finger protein ATL2M, putative, expressed seq=cds; coord=10:64372222..64372891:-1; parent_gene=GRMZM2G356895	2.28708	-	GO:0005488//binding	-	gi|226494179|ref|NP_001147642.1|/1.23587e-64/RING-H2 finger protein ATL2M [Zea mays]
GRMZM2G358924_T01	GRMZM2G358924		not assigned.unknown	seq=cds; coord=1:179724070..179724491:1; parent_gene=GRMZM2G358924	3.17725	-	-	-	gi|242086452|ref|XP_002443651.1|/9.30693e-07/hypothetical protein SORBIDRAFT_08g022870 [Sorghum bicolor]
GRMZM2G359904_T01	GRMZM2G359904		lipid metabolism.lipid degradation.lipases.triacylglycerol lipase	moderately similar to ( 472) AT1G06800 | Symbols: | lipase class 3 family protein | chr1:2090109-2091443 REVERSEweakly similar to ( 101) POLB_MAIZE Putative Pol polyprotein from transposon element Bs1 (ORF 1) - Zea mays (Maize)moderately similar to ( 457) loc_os05g32380 12005.m07471 protein triacylglycerol lipase, putative, expressed seq=cds; coord=6:77144115..77148553:-1; parent_gene=GRMZM2G3599…	5.33232	GO:0009536//plastid	GO:0004091//carboxylesterase activity	GO:0044238//primary metabolic process	gi|242094766|ref|XP_002437873.1|/0/hypothetical protein SORBIDRAFT_10g004170 [Sorghum bicolor]
GRMZM2G359929_T01	GRMZM2G359929		cell.organisation	moderately similar to ( 364) AT2G01910 | Symbols: ATMAP65-6, MAP65-6 | ATMAP65-6; microtubule binding | chr2:417698-420182 FORWARDhighly similar to ( 606) loc_os03g50970 12003.m10079 protein retrotransposon protein, putative, Ty1-copia subclass, expressed seq=cds; coord=1:269120633..269126154:-1; parent_gene=GRMZM2G359929	1.6086	-	-	-	gi|242033175|ref|XP_002463982.1|/0/hypothetical protein SORBIDRAFT_01g009980 [Sorghum bicolor]
GRMZM2G361984_T01	GRMZM2G361984		minor CHO metabolism.raffinose family.galactinol synthases.putative	moderately similar to ( 390) AT2G47180 | Symbols: AtGolS1 | AtGolS1 (Arabidopsis thaliana galactinol synthase 1); transferase, transferring glycosyl groups / transferase, transferring hexosyl groups | chr2:19369049-19370372 REVERSEmoderately similar to ( 411) loc_os07g48830 12007.m09092 protein galactinol synthase 3, putative, expressed seq=cds; coord=7:174158639..174179366:1; parent_gene=GRMZM2G…	5.33842	-	GO:0016757//transferase activity, transferring glycosyl groups	-	gi|242046992|ref|XP_002461242.1|/8.30137e-122/hypothetical protein SORBIDRAFT_02g043450 [Sorghum bicolor]
GRMZM2G364127_T01	GRMZM2G364127		protein.degradation.ubiquitin.E3.RING	very weakly similar to (82.0) loc_os03g44642 12003.m09503 protein RING-H2 finger protein ATL2A, putative seq=cds; coord=1:250090663..250091118:-1; parent_gene=GRMZM2G364127	1.6802	-	GO:0005488//binding	-	gi|242038703|ref|XP_002466746.1|/4.9317e-33/hypothetical protein SORBIDRAFT_01g013370 [Sorghum bicolor]
GRMZM2G365188_T01	GRMZM2G365188		hormone metabolism.auxin.induced-regulated-responsive-activated	very weakly similar to (99.8) loc_os04g56690 12004.m10556 protein OsSAUR23 - Auxin-responsive SAUR gene family member, expressed seq=cds; coord=2:3564744..3566656:1; parent_gene=GRMZM2G365188	52.8669	GO:0043231//intracellular membrane-bounded organelle	GO:0005515//protein binding	GO:0009755//hormone-mediated signaling pathway	gi|226510085|ref|NP_001151649.1|/6.85196e-41/SAUR23 - auxin-responsive SAUR family member [Zea mays]
GRMZM2G366130_T01	GRMZM2G366130		RNA.regulation of transcription.HB,Homeobox transcription factor family	weakly similar to ( 155) AT5G06710 | Symbols: HAT14 | HAT14 (HOMEOBOX FROM ARABIDOPSIS THALIANA); DNA binding / transcription factor | chr5:2069093-2070284 REVERSEweakly similar to ( 176) loc_os08g36220 12008.m07611 protein homeobox-leucine zipper protein HAT14, putative, expressed seq=cds; coord=2:185855731..185856935:1; parent_gene=GRMZM2G366130	3.63688	-	GO:0003677//DNA binding	GO:0010468//regulation of gene expression;GO:0006350	gi|226495373|ref|NP_001151083.1|/3.05025e-61/homeobox-leucine zipper protein HAT14 [Zea mays]
GRMZM2G366373_T02	GRMZM2G366373		RNA.regulation of transcription.Aux/IAA family	weakly similar to ( 141) AT1G04240 | Symbols: SHY2, IAA3 | SHY2 (SHORT HYPOCOTYL 2); transcription factor | chr1:1128564-1129319 REVERSEmoderately similar to ( 207) IAA12_ORYSA Auxin-responsive protein IAA12 (Indoleacetic acid-induced protein 12) - Oryza sativa (Rice)moderately similar to ( 207) loc_os03g43410 12003.m09387 protein OsIAA12 - Auxin-responsive Aux/IAA gene family member, expressed s…	1.61367	-	-	GO:0010468//regulation of gene expression;GO:0009725//response to hormone stimulus;GO:0034645//cellular macromolecule biosynthetic process;GO:0044238//primary metabolic process	gi|223944691|gb|ACN26429.1|/1.30661e-86/unknown [Zea mays]
GRMZM2G367941_T01	GRMZM2G367941		not assigned.unknown	seq=cds; coord=6:2722342..2723045:-1; parent_gene=GRMZM2G367941	1.08831	-	-	-	-
GRMZM2G369284_T01	GRMZM2G369284		protein.degradation.cysteine protease	weakly similar to ( 113) loc_os07g02890 12007.m04760 protein F-box domain containing protein, expressed seq=cds; coord=7:2890802..2891507:-1; parent_gene=GRMZM2G369284	1.45771	-	-	-	gi|242048116|ref|XP_002461804.1|/5.09806e-39/hypothetical protein SORBIDRAFT_02g008380 [Sorghum bicolor]
GRMZM2G370507_T01	GRMZM2G370507		not assigned.unknown	seq=cds; coord=2:39639314..39639879:1; parent_gene=GRMZM2G370507	1.15041	-	-	-	gi|21741986|emb|CAD41036.1|/9.64877e-12/OSJNBa0060P14.7 [Oryza sativa Japonica Group]
GRMZM2G370863_T01	GRMZM2G370863		RNA.regulation of transcription.zf-HD	very weakly similar to ( 100) AT3G28917 | Symbols: MIF2 | MIF2 (MINI ZINC FINGER 2); DNA binding | chr3:10925014-10925316 FORWARDweakly similar to ( 102) loc_os11g03420 12011.m04537 protein zinc finger homeodomain protein 1, putative, expressed seq=cds; coord=4:85732543..85733220:1; parent_gene=GRMZM2G370863	1.13004	-	-	-	gi|223974613|gb|ACN31494.1|/3.60833e-35/unknown [Zea mays]
GRMZM2G371462_T01	GRMZM2G371462		not assigned.unknown	seq=cds; coord=1:137132381..137132745:-1; parent_gene=GRMZM2G371462	1.57432	-	-	-	gi|125531622|gb|EAY78187.1|/1.44081e-07/hypothetical protein OsI_33234 [Oryza sativa Indica Group]
GRMZM2G371524_T01	GRMZM2G371524		not assigned.unknown	seq=cds; coord=8:105846481..105846996:1; parent_gene=GRMZM2G371524	1.11362	-	-	-	gi|242090509|ref|XP_002441087.1|/2.80316e-13/hypothetical protein SORBIDRAFT_09g020130 [Sorghum bicolor]
GRMZM2G373124_T01	GRMZM2G373124		misc.UDP glucosyl and glucoronyl transferases	highly similar to ( 540) AT1G22360 | Symbols: AtUGT85A2 | AtUGT85A2 (UDP-glucosyl transferase 85A2); UDP-glycosyltransferase/ glucuronosyltransferase/ transferase, transferring glycosyl groups | chr1:7895068-7897527 REVERSEmoderately similar to ( 205) IAAG_MAIZE Indole-3-acetate beta-glucosyltransferase (EC 2.4.1.121) (IAA-Glu synthetase) ((Uridine 5-diphosphate-glucose:indol-3-ylacetyl)-beta-D-g…	1.43005	-	GO:0016757//transferase activity, transferring glycosyl groups	-	gi|226509248|ref|NP_001147350.1|/0/LOC100280958 [Zea mays]
GRMZM2G373435_T01	GRMZM2G373435		protein.postranslational modification.kinase.receptor like cytoplasmatic kinase VII	moderately similar to ( 428) AT2G05940 | Symbols: | protein kinase, putative | chr2:2287514-2289270 REVERSEmoderately similar to ( 215) NORK_MEDTR Nodulation receptor kinase precursor (EC 2.7.11.1) (Does not make infections protein 2) (Symbiosis receptor-like kinase) (MtSYMRK) - Medicago truncatula (Barrel medic)highly similar to ( 626) loc_os06g10160 12006.m05734 protein protein kinase APK1A, ch…	1.22718	GO:0043231//intracellular membrane-bounded organelle	GO:0004672//protein kinase activity;GO:0032559	GO:0006464//cellular protein modification process	gi|242095064|ref|XP_002438022.1|/0/hypothetical protein SORBIDRAFT_10g006630 [Sorghum bicolor]
GRMZM2G375696_T01	GRMZM2G375696		not assigned.unknown	seq=cds; coord=8:151193429..151193965:-1; parent_gene=GRMZM2G375696	1.42676	-	-	-	gi|242058359|ref|XP_002458325.1|/1.57871e-17/hypothetical protein SORBIDRAFT_03g031300 [Sorghum bicolor]
GRMZM2G376661_T01	GRMZM2G376661		hormone metabolism.jasmonate.synthesis-degradation.allene oxidase synthase	highly similar to ( 566) AT5G42650 | Symbols: AOS, CYP74A, DDE2 | AOS (ALLENE OXIDE SYNTHASE); allene oxide synthase/ hydro-lyase/ oxygen binding | chr5:17097803-17099359 REVERSEhighly similar to ( 828) C74A1_ORYSA Cytochrome P450 74A1, chloroplast precursor (EC 4.2.1.92) (Allene oxide synthase 1) (Hydroperoxide dehydrase 1) - Oryza sativa (Rice)highly similar to ( 828) loc_os03g55800 12003.m1049…	1.15911	GO:0043231//intracellular membrane-bounded organelle	GO:0016491//oxidoreductase activity;GO:0005506//iron ion binding;GO:0016829//lyase activity	-	gi|195641566|gb|ACG40251.1|/0/cytochrome P450 CYP74A18 [Zea mays]
GRMZM2G378054_T01	GRMZM2G378054		protein.degradation.ubiquitin.E3.RING	weakly similar to ( 107) AT4G02075 | Symbols: PIT1 | PIT1 (pitchoun 1); protein binding / zinc ion binding | chr4:913555-916414 REVERSEmoderately similar to ( 243) loc_os01g19800 12001.m08517 protein PIT1, putative, expressed seq=cds; coord=8:36543922..36554043:1; parent_gene=GRMZM2G378054	1.66427	GO:0043231//intracellular membrane-bounded organelle	-	-	gi|226499512|ref|NP_001150090.1|/4.749e-82/PIT1 [Zea mays]
GRMZM2G378762_T01	GRMZM2G378762		not assigned.unknown	weakly similar to ( 173) loc_os05g23130 12005.m06608 protein expressed protein seq=cds; coord=6:86626810..86628189:1; parent_gene=GRMZM2G378762	41.7785	-	-	-	gi|226504004|ref|NP_001144411.1|/9.69657e-84/uncharacterized protein LOC100277347 [Zea mays]
GRMZM2G380789_T01	GRMZM2G380789		not assigned.unknown	moderately similar to ( 367) AT4G37680 | Symbols: HHP4 | HHP4 (heptahelical protein 4); receptor | chr4:17701231-17702568 FORWARDhighly similar to ( 548) loc_os03g10300 12003.m06483 protein haemolysin-III related family protein, expressed seq=cds; coord=1:23046863..23048308:-1; parent_gene=GRMZM2G380789	1.00812	GO:0031224//intrinsic to membrane	-	-	gi|242041865|ref|XP_002468327.1|/2.72044e-168/hypothetical protein SORBIDRAFT_01g043860 [Sorghum bicolor]
GRMZM2G381638_T01	GRMZM2G381638		RNA.regulation of transcription.unclassified	very weakly similar to (95.1) loc_os09g25420 12009.m05694 protein zinc finger, C2H2 type family protein, expressed seq=cds; coord=7:117178981..117180971:-1; parent_gene=GRMZM2G381638	3.04266	-	GO:0005488//binding	-	gi|293332065|ref|NP_001168509.1|/0/uncharacterized protein LOC100382288 [Zea mays]
GRMZM2G386463_T01	GRMZM2G386463		not assigned.unknown	seq=cds; coord=1:199612825..199613567:1; parent_gene=GRMZM2G386463	1.03118	GO:0000139//Golgi membrane;GO:0031224//intrinsic to membrane	GO:0016758//transferase activity, transferring hexosyl groups	GO:0006464//cellular protein modification process	gi|162463692|ref|NP_001105840.1|/4.12208e-38/3-alpha-L-fucosyltransferase [Zea mays]
GRMZM2G388051_T01	GRMZM2G388051		hormone metabolism.auxin.induced-regulated-responsive-activated	seq=cds; coord=2:9617325..9617666:-1; parent_gene=GRMZM2G388051	1.12013	-	GO:0005515//protein binding	GO:0009755//hormone-mediated signaling pathway	gi|242074336|ref|XP_002447104.1|/7.77553e-30/hypothetical protein SORBIDRAFT_06g028645 [Sorghum bicolor]
GRMZM2G390236_T01	GRMZM2G390236		not assigned.unknown	weakly similar to ( 105) loc_os01g03130 12001.m06952 protein expressed protein seq=cds; coord=3:25309307..25310108:-1; parent_gene=GRMZM2G390236	5.73195	-	-	-	gi|212724036|ref|NP_001131832.1|/1.15714e-52/uncharacterized protein LOC100193207 [Zea mays]
GRMZM2G391696_T01	GRMZM2G391696		not assigned.unknown	seq=cds; coord=1:288761916..288762206:1; parent_gene=GRMZM2G391696	3.29111	-	-	-	gi|242037773|ref|XP_002466281.1|/5.52215e-12/hypothetical protein SORBIDRAFT_01g004985 [Sorghum bicolor]
GRMZM2G392106_T01	GRMZM2G392106		not assigned.unknown	seq=cds; coord=2:109490900..109491954:1; parent_gene=GRMZM2G392106	5.62826	-	-	-	-
GRMZM2G392863_T01	GRMZM2G392863		not assigned.unknown	seq=cds; coord=1:6809044..6809867:1; parent_gene=GRMZM2G392863	3.83085	GO:0031410//cytoplasmic vesicle	GO:0016787//hydrolase activity	GO:0006950//response to stress	gi|226497814|ref|NP_001146981.1|/3.46262e-20/flower-specific gamma-thionin precursor [Zea mays]
GRMZM2G393014_T01	GRMZM2G393014		hormone metabolism.cytokinin.synthesis-degradation	weakly similar to ( 162) AT1G68460 | Symbols: ATIPT1 | ATIPT1 (isopentenyltransferase 1); adenylate dimethylallyltransferase | chr1:25668976-25670049 REVERSEmoderately similar to ( 328) loc_os01g49390 12001.m11125 protein isopentenyltransferase, putative, expressed seq=cds; coord=8:151594820..151595908:-1; parent_gene=GRMZM2G393014	1.75888	GO:0043231//intracellular membrane-bounded organelle	-	-	gi|242054047|ref|XP_002456169.1|/2.09688e-120/hypothetical protein SORBIDRAFT_03g031570 [Sorghum bicolor]
GRMZM2G393272_T01	GRMZM2G393272		protein.degradation.ubiquitin.E3.SCF.FBOX	weakly similar to ( 144) AT2G42620 | Symbols: MAX2, ORE9, PP2 | MAX2 (MORE AXILLARY BRANCHES 2); ubiquitin-protein ligase | chr2:17756170-17758251 FORWARDmoderately similar to ( 265) MAX2_ORYSA F-box/LRR-repeat MAX2 homolog (F-box and leucine-rich repeat MAX2 homolog) - Oryza sativa (Rice)moderately similar to ( 265) loc_os06g06050 12006.m05331 protein F-box/LRR-repeat MAX2, putative, expressed s…	2.79504	GO:0043231//intracellular membrane-bounded organelle;GO:0043234//protein complex	-	GO:0009314//response to radiation;GO:0060918//auxin transport;GO:0044267//cellular protein metabolic process;GO:0009933//meristem structural organization;GO:0006950//response to stress	gi|242092018|ref|XP_002436499.1|/0/hypothetical protein SORBIDRAFT_10g003790 [Sorghum bicolor]
GRMZM2G395950_T01	GRMZM2G395950		not assigned.unknown	seq=cds; coord=1:80432002..80432673:-1; parent_gene=GRMZM2G395950	2.5653	-	-	-	gi|226498634|ref|NP_001142447.1|/1.06861e-23/uncharacterized protein LOC100274638 [Zea mays]
GRMZM2G396640_T01	GRMZM2G396640		not assigned.unknown	moderately similar to ( 347) loc_os03g39740 12003.m35305 protein expressed protein seq=cds; coord=1:79440595..79445140:-1; parent_gene=GRMZM2G396640	1.01764	-	-	-	gi|242035321|ref|XP_002465055.1|/0/hypothetical protein SORBIDRAFT_01g031340 [Sorghum bicolor]
GRMZM2G396951_T01	GRMZM2G396951		not assigned.unknown	seq=cds; coord=8:73088500..73089179:-1; parent_gene=GRMZM2G396951	4.50688	-	-	-	gi|194708614|gb|ACF88391.1|/1.85318e-31/unknown [Zea mays]
GRMZM2G399362_T01	GRMZM2G399362		hormone metabolism.auxin.induced-regulated-responsive-activated	highly similar to ( 554) AT2G37980 | Symbols: | unknown protein | chr2:15894162-15897452 REVERSEhighly similar to ( 715) loc_os05g37880 12005.m07967 protein axi 1 like protein, putative, expressed seq=cds; coord=8:97712162..97716261:-1; parent_gene=GRMZM2G399362	1.45344	-	-	-	gi|242088119|ref|XP_002439892.1|/0/hypothetical protein SORBIDRAFT_09g022120 [Sorghum bicolor]
GRMZM2G399396_T01	GRMZM2G399396		not assigned.unknown	seq=cds; coord=9:113221373..113222248:1; parent_gene=GRMZM2G399396	2.40521	-	-	-	-
GRMZM2G399541_T01	GRMZM2G399541		not assigned.unknown	seq=cds; coord=8:128811372..128812041:-1; parent_gene=GRMZM2G399541	1.14354	-	-	-	gi|226500370|ref|NP_001142899.1|/1.63196e-36/uncharacterized protein LOC100275324 [Zea mays]
GRMZM2G399644_T01	GRMZM2G399644		hormone metabolism.auxin.induced-regulated-responsive-activated	weakly similar to ( 158) AT3G43120 | Symbols: | auxin-responsive protein-related | chr3:15094644-15095312 FORWARDmoderately similar to ( 223) loc_os09g26610 12009.m05813 protein OsSAUR38 - Auxin-responsive SAUR gene family member, expressed seq=cds; coord=7:120720628..120721489:-1; parent_gene=GRMZM2G399644	1.04241	GO:0042579//microbody	GO:0005515//protein binding	GO:0009755//hormone-mediated signaling pathway	gi|242049396|ref|XP_002462442.1|/9.24546e-75/hypothetical protein SORBIDRAFT_02g025620 [Sorghum bicolor]
GRMZM2G404081_T01	GRMZM2G404081		not assigned.unknown	moderately similar to ( 354) AT1G29050 | Symbols: | unknown protein | chr1:10136376-10139082 REVERSEmoderately similar to ( 483) loc_os06g34060 12006.m07942 protein expressed protein seq=cds; coord=6:106425279..106427173:1; parent_gene=GRMZM2G404081	2.99489	GO:0043231//intracellular membrane-bounded organelle;GO:0031410//cytoplasmic vesicle	-	-	gi|242093176|ref|XP_002437078.1|/2.99797e-171/hypothetical protein SORBIDRAFT_10g020920 [Sorghum bicolor]
GRMZM2G404599_T01	GRMZM2G404599		not assigned.unknown	seq=cds; coord=9:23214790..23215293:-1; parent_gene=GRMZM2G404599	3.80045	-	-	-	gi|195617308|gb|ACG30484.1|/4.65736e-23/hypothetical protein [Zea mays]
GRMZM2G404676_T01	GRMZM2G404676		misc.peroxidases	moderately similar to ( 253) AT4G11290 | Symbols: | peroxidase, putative | chr4:6869993-6871476 FORWARDmoderately similar to ( 254) PER1_ORYSA Peroxidase 1 precursor (EC 1.11.1.7) - Oryza sativa (Rice)moderately similar to ( 407) loc_os07g01420 12007.m04622 protein peroxidase 1 precursor, putative seq=cds; coord=7:1119967..1121310:1; parent_gene=GRMZM2G404676	1.14013	GO:0031410//cytoplasmic vesicle	GO:0016209//antioxidant activity;GO:0005506//iron ion binding;GO:0003824//catalytic activity	GO:0006950//response to stress;GO:0008152//metabolic process	gi|242042670|ref|XP_002459206.1|/3.30232e-129/hypothetical protein SORBIDRAFT_02g000520 [Sorghum bicolor]
GRMZM2G404682_T01	GRMZM2G404682		not assigned.unknown	very weakly similar to (99.0) loc_os04g39370 12004.m08926 protein metal ion binding protein, putative seq=cds; coord=2:39839118..39839816:1; parent_gene=GRMZM2G404682	3.32539	-	-	-	gi|242076132|ref|XP_002448002.1|/9.2461e-25/hypothetical protein SORBIDRAFT_06g019520 [Sorghum bicolor]
GRMZM2G406108_T01	GRMZM2G406108		not assigned.unknown	seq=cds; coord=10:29308938..29309871:1; parent_gene=GRMZM2G406108	1.02539	-	-	-	gi|259490275|ref|NP_001159013.1|/6.45597e-32/membrane protein [Zea mays]
GRMZM2G406313_T01	GRMZM2G406313		misc.protease inhibitor/seed storage/lipid transfer protein (LTP) family protein	weakly similar to ( 129) AT2G45180 | Symbols: | protease inhibitor/seed storage/lipid transfer protein (LTP) family protein | chr2:18626377-18626781 FORWARDweakly similar to ( 127) 14KD_DAUCA 14 kDa proline-rich protein DC2.15 precursor - Daucus carota (Carrot)weakly similar to ( 176) loc_os02g44310 12002.m09471 protein cortical cell-delineating protein precursor, putative, expressed seq=cds; coo…	4.27914	GO:0031410//cytoplasmic vesicle	GO:0005488//binding	GO:0006810//transport	gi|226506950|ref|NP_001152584.1|/5.46895e-47/cortical cell-delineating protein precursor [Zea mays]
GRMZM2G406758_T02	GRMZM2G406758		protein.degradation.ubiquitin.E3.RING	weakly similar to ( 155) AT5G62560 | Symbols: | armadillo/beta-catenin repeat family protein / U-box domain-containing protein | chr5:25110073-25111752 FORWARDvery weakly similar to (97.8) SPL11_ORYSA Spotted leaf protein 11 (Spotted leaf11) (Cell death-related protein SPL11) - Oryza sativa (Rice)highly similar to ( 551) loc_os06g13080 12006.m06023 protein spotted leaf protein 11, putative, expre…	1.81385	-	-	-	gi|242092570|ref|XP_002436775.1|/1.29372e-167/hypothetical protein SORBIDRAFT_10g008610 [Sorghum bicolor]
GRMZM2G406951_T01	GRMZM2G406951		lipid metabolism.lipid degradation.lipases.triacylglycerol lipase	moderately similar to ( 375) AT1G05800 | Symbols: DGL | DGL (DONGLE); triacylglycerol lipase | chr1:1741204-1742619 FORWARDhighly similar to ( 642) loc_os01g67430 12001.m12847 protein triacylglycerol lipase, putative, expressed seq=cds; coord=3:166596669..166598742:-1; parent_gene=GRMZM2G406951	1.2006	GO:0043231//intracellular membrane-bounded organelle	GO:0016787//hydrolase activity	-	gi|20161015|dbj|BAB89948.1|/0/putative DAD1 [Oryza sativa Japonica Group]
GRMZM2G408706_T01	GRMZM2G408706		development.unspecified	moderately similar to ( 201) AT5G10830 | Symbols: | embryo-abundant protein-related | chr5:3423731-3424649 FORWARDmoderately similar to ( 354) loc_os01g51870 12001.m11363 protein S-adenosylmethionine-dependent methyltransferase, putative, expressed seq=cds; coord=8:155025675..155031100:1; parent_gene=GRMZM2G408706	1.3614	GO:0043231//intracellular membrane-bounded organelle	GO:0016741	-	gi|125527497|gb|EAY75611.1|/0/hypothetical protein OsI_03515 [Oryza sativa Indica Group]
GRMZM2G408706_T02	GRMZM2G408706		development.unspecified	moderately similar to ( 262) AT5G10830 | Symbols: | embryo-abundant protein-related | chr5:3423731-3424649 FORWARDmoderately similar to ( 441) loc_os01g51870 12001.m11363 protein S-adenosylmethionine-dependent methyltransferase, putative, expressed seq=cds; coord=8:155025675..155031022:1; parent_gene=GRMZM2G408706	1.31108	GO:0043231//intracellular membrane-bounded organelle	GO:0016741	-	gi|125527497|gb|EAY75611.1|/0/hypothetical protein OsI_03515 [Oryza sativa Indica Group]
GRMZM2G409358_T01	GRMZM2G409358		development.unspecified	weakly similar to ( 150) AT1G76800 | Symbols: | nodulin, putative | chr1:28829345-28829935 FORWARDweakly similar to ( 120) NO21_SOYBN Nodulin 21 (N-21) - Glycine max (Soybean)weakly similar to ( 174) loc_os02g43030 12002.m09338 protein conserved mebrane associated protein, DUF125, putative, expressed seq=cds; coord=5:189865490..189866191:-1; parent_gene=GRMZM2G409358	2.18282	GO:0044464//cell part	-	-	gi|242063114|ref|XP_002452846.1|/5.02985e-59/hypothetical protein SORBIDRAFT_04g033480 [Sorghum bicolor]
GRMZM2G410567_T01	GRMZM2G410567		hormone metabolism.auxin.induced-regulated-responsive-activated	highly similar to ( 701) AT1G28130 | Symbols: GH3.17 | GH3.17; indole-3-acetic acid amido synthetase | chr1:9826379-9827883 FORWARDhighly similar to ( 612) GH31_ORYSA Probable indole-3-acetic acid-amido synthetase GH3.1 (EC 6.3.2.-) (Auxin-responsive GH3-like protein 1) (OsGH3-1) - Oryza sativa (Rice)highly similar to ( 612) loc_os01g57610 12001.m11911 protein indole-3-acetic acid-amido synthetas…	1.27499	GO:0043231//intracellular membrane-bounded organelle	GO:0016881//acid-amino acid ligase activity	GO:0009725//response to hormone stimulus;GO:0009314//response to radiation;GO:0048878//chemical homeostasis	gi|242068645|ref|XP_002449599.1|/0/hypothetical protein SORBIDRAFT_05g019810 [Sorghum bicolor]
GRMZM2G411691_T01	GRMZM2G411691		not assigned.unknown	very weakly similar to (89.7) AT5G45320 | Symbols: | FUNCTIONS IN: molecular_function unknown; INVOLVED IN: biological_process unknown; LOCATED IN: endomembrane system; EXPRESSED IN: inflorescence meristem, flower, root; EXPRESSED DURING: petal differentiation and expansion stage; CONTAINS InterPro DOMAIN/s: Harpin-induced 1 (InterPro:IPR010847); BEST Arabidopsis thaliana protein match is: unknow…	1.52928	-	-	-	gi|242080695|ref|XP_002445116.1|/9.99411e-74/hypothetical protein SORBIDRAFT_07g004360 [Sorghum bicolor]
GRMZM2G412207_T04	GRMZM2G412207		cell wall.degradation.pectate lyases and polygalacturonases	highly similar to ( 635) AT4G13710 | Symbols: | pectate lyase family protein | chr4:7962550-7966012 FORWARDmoderately similar to ( 434) PEL_LILLO Pectate lyase precursor (EC 4.2.2.2) - Lilium longiflorum (Trumpet lily)highly similar to ( 716) loc_os04g05050 12004.m35243 protein pectate lyase 8 precursor, putative, expressed seq=cds; coord=10:101889767..101897989:-1; parent_gene=GRMZM2G412207	1.83614	-	GO:0016837//carbon-oxygen lyase activity, acting on polysaccharides	-	gi|226530844|ref|NP_001141589.1|/0/uncharacterized protein LOC100273705 [Zea mays]
GRMZM2G412373_T01	GRMZM2G412373		stress.biotic	weakly similar to ( 129) AT2G34930 | Symbols: | disease resistance family protein | chr2:14737169-14739886 REVERSEvery weakly similar to (94.0) RPK1_IPONI Receptor-like protein kinase precursor (EC 2.7.11.1) - Ipomoea nil (Japanese morning glory) (Pharbitis nil)moderately similar to ( 432) loc_os10g33140 12010.m06146 protein hcrVf2 protein, putative, expressed seq=cds; coord=5:30204905..30207267:…	1.86436	GO:0031410//cytoplasmic vesicle	-	-	gi|194706122|gb|ACF87145.1|/0/unknown [Zea mays]
GRMZM2G415172_T01	GRMZM2G415172		not assigned.unknown	seq=cds; coord=8:87769741..87770022:1; parent_gene=GRMZM2G415172	12.2261	-	-	-	gi|242087851|ref|XP_002439758.1|/6.5878e-13/hypothetical protein SORBIDRAFT_09g019530 [Sorghum bicolor]
GRMZM2G416471_T01	GRMZM2G416471		not assigned.unknown	seq=cds; coord=3:153630395..153630868:1; parent_gene=GRMZM2G416471	1.21229	-	-	-	gi|226496898|ref|NP_001144353.1|/2.57317e-22/uncharacterized protein LOC100277262 [Zea mays]
GRMZM2G419209_T01	GRMZM2G419209		not assigned.unknown	seq=cds; coord=4:238820155..238821007:-1; parent_gene=GRMZM2G419209	2.47007	-	-	-	gi|226509618|ref|NP_001143783.1|/1.37045e-56/uncharacterized protein LOC100276549 precursor [Zea mays]
GRMZM2G421934_T01	GRMZM2G421934		not assigned.unknown	seq=cds; coord=1:108121650..108121832:-1; parent_gene=GRMZM2G421934	3.14004	-	-	-	gi|242040021|ref|XP_002467405.1|/7.43254e-17/hypothetical protein SORBIDRAFT_01g027496 [Sorghum bicolor]
GRMZM2G422419_T01	GRMZM2G422419		hormone metabolism.auxin.induced-regulated-responsive-activated	seq=cds; coord=1:177626745..177627125:-1; parent_gene=GRMZM2G422419	1.00547	-	-	-	gi|242086364|ref|XP_002443607.1|/2.03147e-14/hypothetical protein SORBIDRAFT_08g022330 [Sorghum bicolor]
GRMZM2G423139_T01	GRMZM2G423139		signalling.calcium	weakly similar to ( 109) loc_os03g59790 12003.m10875 protein calcium-binding protein, putative seq=cds; coord=5:2923164..2924447:-1; parent_gene=GRMZM2G423139	9.54729	GO:0031410//cytoplasmic vesicle	GO:0046872//metal ion binding	-	gi|293336536|ref|NP_001167734.1|/1.61136e-69/uncharacterized protein LOC100381422 [Zea mays]
GRMZM2G423378_T01	GRMZM2G423378		protein.degradation.ubiquitin.E3.SCF.FBOX	very weakly similar to (92.4) AT1G31430 | Symbols: | pentatricopeptide (PPR) repeat-containing protein | chr1:11254025-11255737 REVERSEmoderately similar to ( 427) loc_os06g04980 12006.m05227 protein F-box domain containing protein seq=cds; coord=6:102951820..102955327:-1; parent_gene=GRMZM2G423378	1.04668	GO:0043231//intracellular membrane-bounded organelle;GO:0031410//cytoplasmic vesicle	-	-	gi|242067205|ref|XP_002448879.1|/7.77859e-127/hypothetical protein SORBIDRAFT_05g000850 [Sorghum bicolor]
GRMZM2G425206_T01	GRMZM2G425206		not assigned.unknown	seq=cds; coord=3:214829622..214830396:-1; parent_gene=GRMZM2G425206	3.70728	GO:0031224//intrinsic to membrane;GO:0005811//lipid particle	-	-	gi|226507735|ref|NP_001147251.1|/5.12476e-34/OLE-5 [Zea mays]
GRMZM2G425427_T01	GRMZM2G425427		RNA.regulation of transcription.MYB domain transcription factor family	moderately similar to ( 242) AT5G49620 | Symbols: AtMYB78 | AtMYB78 (myb domain protein 78); DNA binding / transcription factor | chr5:20137491-20139384 REVERSEweakly similar to ( 153) MYBP_MAIZE Myb-related protein P - Zea mays (Maize)moderately similar to ( 266) loc_os05g04210 12005.m04954 protein cpm5, putative, expressed seq=cds; coord=10:85319450..85321023:-1; parent_gene=GRMZM2G425427	1.21692	GO:0043231//intracellular membrane-bounded organelle	GO:0003676//nucleic acid binding	GO:0010468//regulation of gene expression	gi|308081941|ref|NP_001182983.1|/7.15952e-102/uncharacterized protein LOC100501299 [Zea mays]
GRMZM2G428179_T01	GRMZM2G428179		protein.degradation.ubiquitin.E3.RING	very weakly similar to (80.5) AT2G42360 | Symbols: | zinc finger (C3HC4-type RING finger) family protein | chr2:17640907-17641617 FORWARDweakly similar to ( 194) loc_os01g55110 12001.m11671 protein RING-H2 finger protein ATL2K, putative, expressed seq=cds; coord=8:173934440..173935676:-1; parent_gene=GRMZM2G428179	8.67129	-	GO:0046914//transition metal ion binding	-	gi|224028865|gb|ACN33508.1|/3.49708e-98/unknown [Zea mays]
GRMZM2G428251_T01	GRMZM2G428251		not assigned.unknown	moderately similar to ( 222) loc_os03g05460 12003.m06069 protein expressed protein seq=cds; coord=5:198078521..198079587:1; parent_gene=GRMZM2G428251	1.07709	-	-	-	gi|226506204|ref|NP_001142565.1|/2.74552e-109/uncharacterized protein LOC100274824 [Zea mays]
GRMZM2G430623_T01	GRMZM2G430623		not assigned.unknown	seq=cds; coord=1:179870475..179871449:-1; parent_gene=GRMZM2G430623	2.94681	-	-	-	gi|226497754|ref|NP_001144202.1|/9.01774e-48/uncharacterized protein LOC100277063 [Zea mays]
GRMZM2G431445_T01	GRMZM2G431445		misc.GCN5-related N-acetyltransferase	weakly similar to ( 161) AT2G32030 | Symbols: | GCN5-related N-acetyltransferase (GNAT) family protein | chr2:13632675-13633241 REVERSEmoderately similar to ( 243) loc_os03g58020 12003.m10714 protein N-acetyltransferase, putative, expressed seq=cds; coord=5:4425954..4426553:-1; parent_gene=GRMZM2G431445	1.27695	-	GO:0016740//transferase activity	GO:0009725//response to hormone stimulus	gi|357115088|ref|XP_003559324.1|/1.43561e-63/PREDICTED: uncharacterized protein LOC100842902 [Brachypodium distachyon]
GRMZM2G431856_T01	GRMZM2G431856		cell wall.pectin*esterases.PME	moderately similar to ( 251) AT5G19730 | Symbols: | pectinesterase family protein | chr5:6670562-6673202 FORWARDweakly similar to ( 127) PME1_CITSI Pectinesterase-1 precursor (EC 3.1.1.11) (Pectin methylesterase) (PE) - Citrus sinensis (Sweet orange)highly similar to ( 540) loc_os11g45720 12011.m08404 protein pectinesterase precursor, putative, expressed seq=cds; coord=4:2050240..2051608:1; paren…	1.25923	GO:0030312//external encapsulating structure;GO:0031410//cytoplasmic vesicle	GO:0004091//carboxylesterase activity	GO:0071555//cell wall organization	gi|226497736|ref|NP_001144148.1|/0/uncharacterized protein LOC100277001 precursor [Zea mays]
GRMZM2G432176_T01	GRMZM2G432176		not assigned.unknown	seq=cds; coord=5:7136823..7140428:1; parent_gene=GRMZM2G432176	1.38084	GO:0015630//microtubule cytoskeleton	GO:0003774//motor activity;GO:0032559	GO:0007017//microtubule-based process	gi|242038117|ref|XP_002466453.1|/1.3903e-16/hypothetical protein SORBIDRAFT_01g007970 [Sorghum bicolor]
GRMZM2G435001_T01	GRMZM2G435001		RNA.regulation of transcription.unclassified	weakly similar to ( 116) loc_os06g44320 12006.m08960 protein expressed protein seq=cds; coord=9:105337241..105339572:-1; parent_gene=GRMZM2G435001	2.35987	-	-	-	gi|226506886|ref|NP_001143245.1|/2.95952e-75/uncharacterized protein LOC100275770 [Zea mays]
GRMZM2G436770_T01	GRMZM2G436770		hormone metabolism.cytokinin.synthesis-degradation	moderately similar to ( 251) AT5G19040 | Symbols: ATIPT5, IPT5 | IPT5; ATP binding / tRNA isopentenyltransferase/ transferase, transferring alkyl or aryl (other than methyl) groups | chr5:6362389-6363381 REVERSEmoderately similar to ( 350) loc_os05g24660 12005.m06760 protein cytokinin synthase, putative, expressed seq=cds; coord=3:67169253..67170344:-1; parent_gene=GRMZM2G436770	1.40324	-	GO:0016765//transferase activity, transferring alkyl or aryl (other than methyl) groups;GO:0032559	GO:0006399//tRNA metabolic process;GO:0009690//cytokinin metabolic process	gi|166033752|gb|ABY78886.1|/0/isopentenyl transferase IPT7 [Zea mays]
GRMZM2G436947_T01	GRMZM2G436947		not assigned.unknown	weakly similar to ( 120) loc_os06g11030 12006.m05820 protein EF hand family protein seq=cds; coord=6:111677351..111678198:1; parent_gene=GRMZM2G436947	3.38813	-	GO:0046872//metal ion binding	-	gi|226505680|ref|NP_001149456.1|/6.08534e-39/EF hand family protein [Zea mays]
GRMZM2G437314_T01	GRMZM2G437314		stress.biotic	moderately similar to ( 214) AT3G46730 | Symbols: | disease resistance protein (CC-NBS class), putative | chr3:17213069-17215612 REVERSEhighly similar to ( 857) loc_os07g31800 12007.m07447 protein NB-ARC domain containing protein, expressed seq=cds; coord=10:2257163..2260980:-1; parent_gene=GRMZM2G437314	1.21187	-	GO:0032559	GO:0012501//programmed cell death;GO:0006950//response to stress	gi|242084566|ref|XP_002442708.1|/0/hypothetical protein SORBIDRAFT_08g001640 [Sorghum bicolor]
GRMZM2G438129_T01	GRMZM2G438129		misc.peroxidases	weakly similar to ( 128) AT1G68850 | Symbols: | peroxidase, putative | chr1:25883806-25885177 REVERSEvery weakly similar to (91.7) PER2_ORYSA Peroxidase 2 precursor (EC 1.11.1.7) - Oryza sativa (Rice)moderately similar to ( 204) loc_os06g16350 12006.m06348 protein peroxidase 11 precursor, putative, expressed seq=cds; coord=9:34386809..34387731:-1; parent_gene=GRMZM2G438129	1.07457	GO:0031410//cytoplasmic vesicle	GO:0046872//metal ion binding;GO:0016209//antioxidant activity;GO:0003824//catalytic activity	-	gi|194691874|gb|ACF80021.1|/8.23977e-57/unknown [Zea mays]
GRMZM2G438400_T01	GRMZM2G438400		not assigned.unknown	weakly similar to ( 123) loc_os03g55980 12003.m10508 protein expressed protein seq=cds; coord=5:5749862..5750431:-1; parent_gene=GRMZM2G438400	3.3604	GO:0043231//intracellular membrane-bounded organelle	-	-	gi|242037987|ref|XP_002466388.1|/3.76491e-39/hypothetical protein SORBIDRAFT_01g006870 [Sorghum bicolor]
GRMZM2G438520_T01	GRMZM2G438520		not assigned.unknown	seq=cds; coord=5:76385795..76386616:-1; parent_gene=GRMZM2G438520	1.63114	-	-	-	-
GRMZM2G439422_T01	GRMZM2G439422		misc.peroxidases	moderately similar to ( 357) AT5G47000 | Symbols: | peroxidase, putative | chr5:19069171-19070175 REVERSEmoderately similar to ( 224) PER2_ARAHY Cationic peroxidase 2 precursor (EC 1.11.1.7) (PNPC2) - Arachis hypogaea (Peanut)highly similar to ( 502) loc_os02g50770 12002.m10111 protein peroxidase 65 precursor, putative, expressed seq=cds; coord=4:182611473..182613026:-1; parent_gene=GRMZM2G439422	2.3419	GO:0031410//cytoplasmic vesicle	GO:0016209//antioxidant activity;GO:0005506//iron ion binding;GO:0003824//catalytic activity	GO:0006950//response to stress;GO:0008152//metabolic process	gi|226510262|ref|NP_001148668.1|/0/LOC100282284 precursor [Zea mays]
GRMZM2G440688_T01	GRMZM2G440688		not assigned.unknown	very weakly similar to (87.0) loc_os06g19490 12006.m06608 protein hypothetical protein seq=cds; coord=9:39393177..39393623:-1; parent_gene=GRMZM2G440688	3.42805	-	-	-	gi|242095558|ref|XP_002438269.1|/7.50895e-31/hypothetical protein SORBIDRAFT_10g010890 [Sorghum bicolor]
GRMZM2G442387_T01	GRMZM2G442387		not assigned.unknown	highly similar to ( 568) AT5G18980 | Symbols: | binding | chr5:6334944-6337943 REVERSEnearly identical (1011) loc_os03g24730 12003.m07816 protein expressed protein seq=cds; coord=1:62708548..62714333:1; parent_gene=GRMZM2G442387	1.36491	-	-	-	gi|242040853|ref|XP_002467821.1|/0/hypothetical protein SORBIDRAFT_01g034690 [Sorghum bicolor]
GRMZM2G443495_T05	GRMZM2G443495		misc.nitrilases, *nitrile lyases, berberine bridge enzymes, reticuline oxidases, troponine reductases	moderately similar to ( 462) AT5G64440 | Symbols: AtFAAH | AtFAAH (Arabidopsis thaliana fatty acid amide hydrolase); N-(long-chain-acyl)ethanolamine deacylase/ amidase | chr5:25766229-25770260 FORWARDhighly similar to ( 972) loc_os12g07150 12012.m04704 protein glutamyl-tRNA, putative, expressed seq=cds; coord=10:9579022..9587717:-1; parent_gene=GRMZM2G443495	1.21946	-	GO:0016879//ligase activity, forming carbon-nitrogen bonds	-	gi|242084924|ref|XP_002442887.1|/0/hypothetical protein SORBIDRAFT_08g004400 [Sorghum bicolor]
GRMZM2G447436_T01	GRMZM2G447436		secondary metabolism.phenylpropanoids.lignin biosynthesis.PAL	moderately similar to ( 406) AT3G53260 | Symbols: PAL2, ATPAL2 | PAL2; phenylalanine ammonia-lyase | chr3:19744256-19746619 REVERSEmoderately similar to ( 487) PAL2_ORYSA Phenylalanine ammonia-lyase (EC 4.3.1.5) - Oryza sativa (Rice)moderately similar to ( 487) loc_os02g41680 12002.m09204 protein phenylalanine ammonia-lyase, putative, expressed seq=cds; coord=8:160586359..160587674:1; parent_gene…	2.22525	GO:0044424//intracellular part	GO:0016841//ammonia-lyase activity	GO:0006725//cellular aromatic compound metabolic process	gi|293332887|ref|NP_001168086.1|/3.79856e-141/uncharacterized protein LOC100381820 [Zea mays]
GRMZM2G448241_T01	GRMZM2G448241		not assigned.unknown	weakly similar to ( 159) loc_os02g58110 12002.m10832 protein expressed protein seq=cds; coord=4:169446010..169447203:-1; parent_gene=GRMZM2G448241	6.15987	GO:0031410//cytoplasmic vesicle	-	-	gi|226498048|ref|NP_001145602.1|/1.14138e-67/uncharacterized protein LOC100279080 [Zea mays]
GRMZM2G448368_T01	GRMZM2G448368		stress.abiotic.heat	very weakly similar to (92.8) AT2G17880 | Symbols: | DNAJ heat shock protein, putative | chr2:7767176-7767658 REVERSEweakly similar to ( 110) loc_os08g43490 12008.m08323 protein chaperone protein dnaJ 11, chloroplast precursor, putative, expressed seq=cds; coord=1:33408583..33409730:-1; parent_gene=GRMZM2G448368	2.66958	GO:0043231//intracellular membrane-bounded organelle	GO:0005515//protein binding	GO:0044267//cellular protein metabolic process	gi|242036347|ref|XP_002465568.1|/4.0475e-45/hypothetical protein SORBIDRAFT_01g041250 [Sorghum bicolor]
GRMZM2G450273_T01	GRMZM2G450273		not assigned.unknown	very weakly similar to (82.0) AT5G24860 | Symbols: FPF1 | FPF1 (FLOWERING PROMOTING FACTOR 1) | chr5:8541822-8542154 FORWARDweakly similar to ( 136) loc_os04g21350 12004.m101482 protein flowering promoting factor-like 1, putative, expressed seq=cds; coord=2:88775217..88775962:1; parent_gene=GRMZM2G450273	1.2838	-	-	-	gi|226533500|ref|NP_001148034.1|/1.74548e-36/flowering promoting factor-like 1 [Zea mays]
GRMZM2G450717_T01	GRMZM2G450717		misc.peroxidases	moderately similar to ( 296) AT5G05340 | Symbols: | peroxidase, putative | chr5:1579142-1580819 REVERSEmoderately similar to ( 330) PER2_ORYSA Peroxidase 2 precursor (EC 1.11.1.7) - Oryza sativa (Rice)moderately similar to ( 330) loc_os07g48030 12007.m09018 protein peroxidase 2 precursor, putative, expressed seq=cds; coord=2:216821468..216823063:1; parent_gene=GRMZM2G450717	2.0439	GO:0031410//cytoplasmic vesicle	GO:0046872//metal ion binding;GO:0003824//catalytic activity	GO:0006950//response to stress;GO:0008152//metabolic process	gi|293333010|ref|NP_001170449.1|/2.87811e-138/uncharacterized protein LOC100384441 precursor [Zea mays]
GRMZM2G451965_T01	GRMZM2G451965		cell wall.degradation.cellulases and beta -1,4-glucanases	highly similar to ( 652) AT2G32990 | Symbols: AtGH9B8 | AtGH9B8 (Arabidopsis thaliana glycosyl hydrolase 9B8); catalytic/ hydrolase, hydrolyzing O-glycosyl compounds | chr2:14003361-14005844 FORWARDhighly similar to ( 820) GUN22_ORYSA Endoglucanase 22 precursor (EC 3.2.1.4) (Endo-1,4-beta glucanase 22) (OsGLU11) - Oryza sativa (Rice)highly similar to ( 820) loc_os09g23084 12009.m05465 protein end…	1.4436	GO:0031410//cytoplasmic vesicle	GO:0016798//hydrolase activity, acting on glycosyl bonds	GO:0044238//primary metabolic process	gi|242049190|ref|XP_002462339.1|/0/hypothetical protein SORBIDRAFT_02g024050 [Sorghum bicolor]
GRMZM2G453978_T01	GRMZM2G453978		not assigned.unknown	very weakly similar to (93.2) loc_os04g37700 12004.m08759 protein expressed protein seq=cds; coord=10:121205319..121205931:1; parent_gene=GRMZM2G453978	1.24987	-	GO:0005488//binding	-	gi|242073270|ref|XP_002446571.1|/1.40841e-28/hypothetical protein SORBIDRAFT_06g018290 [Sorghum bicolor]
GRMZM2G454449_T01	GRMZM2G454449		RNA.regulation of transcription.G2-like transcription factor family, GARP	very weakly similar to (94.0) AT2G40260 | Symbols: | myb family transcription factor | chr2:16816818-16818473 REVERSEmoderately similar to ( 211) loc_os06g45890 12006.m09117 protein myb-like DNA-binding domain, SHAQKYF class family protein, expressed seq=cds; coord=9:111251659..111253947:-1; parent_gene=GRMZM2G454449	2.26231	GO:0043231//intracellular membrane-bounded organelle	GO:0003676//nucleic acid binding	GO:0010468//regulation of gene expression	gi|242093874|ref|XP_002437427.1|/6.63262e-79/hypothetical protein SORBIDRAFT_10g026930 [Sorghum bicolor]
GRMZM2G456422_T01	GRMZM2G456422		not assigned.unknown	weakly similar to ( 107) loc_os02g37070 12002.m100800 protein expressed protein seq=cds; coord=4:126880162..126881005:1; parent_gene=GRMZM2G456422	4.76587	GO:0043231//intracellular membrane-bounded organelle	-	-	gi|195640386|gb|ACG39661.1|/4.64896e-39/hypothetical protein [Zea mays]
GRMZM2G456647_T01	GRMZM2G456647		not assigned.unknown	seq=cds; coord=6:167959198..167959823:-1; parent_gene=GRMZM2G456647	1.52989	-	-	-	gi|226495663|ref|NP_001143917.1|/1.97511e-34/uncharacterized protein LOC100276727 [Zea mays]
GRMZM2G457287_T01	GRMZM2G457287		not assigned.unknown	moderately similar to ( 430) AT3G13510 | Symbols: | unknown protein | chr3:4403776-4405741 FORWARDmoderately similar to ( 471) loc_os07g38590 12007.m08105 protein carboxyl-terminal peptidase, putative, expressed seq=cds; coord=4:1992637..1995216:-1; parent_gene=GRMZM2G457287	7.06078	GO:0031410//cytoplasmic vesicle	-	-	gi|242046060|ref|XP_002460901.1|/5.05447e-132/hypothetical protein SORBIDRAFT_02g037130 [Sorghum bicolor]
GRMZM2G458159_T01	GRMZM2G458159		not assigned.unknown	weakly similar to ( 186) AT5G16020 | Symbols: | stress protein-related | chr5:5229692-5232241 FORWARDweakly similar to ( 161) loc_os01g42060 12001.m10473 protein expressed protein seq=cds; coord=3:223750498..223751787:1; parent_gene=GRMZM2G458159	1.52624	-	-	-	gi|242053541|ref|XP_002455916.1|/4.717e-114/hypothetical protein SORBIDRAFT_03g027240 [Sorghum bicolor]
GRMZM2G459663_T01	GRMZM2G459663		signalling.calcium	weakly similar to ( 113) loc_os07g43800 12007.m08605 protein EF hand family protein, expressed seq=cds; coord=7:167817587..167818997:1; parent_gene=GRMZM2G459663	10.5885	-	GO:0005488//binding	-	gi|226492443|ref|NP_001152636.1|/6.31045e-46/EF hand family protein [Zea mays]
GRMZM2G459824_T01	GRMZM2G459824		protein.postranslational modification	weakly similar to ( 188) AT1G07150 | Symbols: MAPKKK13 | MAPKKK13; ATP binding / kinase/ protein kinase/ protein serine/threonine kinase | chr1:2194279-2195778 REVERSEvery weakly similar to (83.2) CDPK2_MAIZE Calcium-dependent protein kinase 2 (EC 2.7.11.1) (CDPK 2) - Zea mays (Maize)moderately similar to ( 427) loc_os03g18170 12003.m07242 protein mitogen-activated protein kinase kinase kinase 1,…	1.56043	-	GO:0016301//kinase activity	-	gi|242041277|ref|XP_002468033.1|/6.53204e-142/hypothetical protein SORBIDRAFT_01g038395 [Sorghum bicolor]
GRMZM2G460576_T01	GRMZM2G460576		not assigned.unknown	seq=cds; coord=8:159954132..159954944:-1; parent_gene=GRMZM2G460576	1.16439	-	-	-	-
GRMZM2G461648_T01	GRMZM2G461648		RNA.regulation of transcription.WRKY domain transcription factor family	weakly similar to ( 132) loc_os11g02470 12011.m04446 protein WRKY transcription factor 38, putative seq=cds; coord=4:184676411..184677679:-1; parent_gene=GRMZM2G461648	7.15092	GO:0043231//intracellular membrane-bounded organelle	-	-	gi|242069741|ref|XP_002450147.1|/6.63852e-85/hypothetical protein SORBIDRAFT_05g001170 [Sorghum bicolor]
GRMZM2G462635_T01	GRMZM2G462635		not assigned.unknown	moderately similar to ( 232) loc_os05g20570 12005.m06455 protein pectinesterase inhibitor domain containing protein, expressed seq=cds; coord=6:134923224..134924182:1; parent_gene=GRMZM2G462635	2.39678	GO:0031410//cytoplasmic vesicle	GO:0030234//enzyme regulator activity;GO:0004091//carboxylesterase activity	-	gi|238009122|gb|ACR35596.1|/9.1766e-114/unknown [Zea mays]
GRMZM2G462750_T01	GRMZM2G462750		not assigned.unknown	very weakly similar to (94.7) loc_os06g50170 12006.m09541 protein protein BRE, putative, expressed seq=cds; coord=3:132795058..132802573:-1; parent_gene=GRMZM2G462750	1.37602	GO:0005737//cytoplasm	-	-	gi|226505858|ref|NP_001149020.1|/1.00514e-27/protein BRE [Zea mays]
GRMZM2G463445_T01	GRMZM2G463445		RNA.regulation of transcription.unclassified	moderately similar to ( 303) AT3G54400 | Symbols: | aspartyl protease family protein | chr3:20140291-20142599 REVERSEmoderately similar to ( 408) loc_os01g72510 12001.m13286 protein aspartic proteinase nepenthesin-2 precursor, putative, expressed seq=cds; coord=1:238538404..238541574:1; parent_gene=GRMZM2G463445	1.69207	GO:0031410//cytoplasmic vesicle	GO:0004175//endopeptidase activity	GO:0019538//protein metabolic process	gi|125529158|gb|EAY77272.1|/1.2939e-112/hypothetical protein OsI_05246 [Oryza sativa Indica Group]
GRMZM2G465133_T01	GRMZM2G465133		stress.biotic	weakly similar to ( 104) loc_os05g50500 12005.m09119 protein expressed protein seq=cds; coord=6:166814415..166815482:-1; parent_gene=GRMZM2G465133	1.25543	-	-	-	gi|293332233|ref|NP_001169707.1|/1.52763e-59/uncharacterized protein LOC100383588 [Zea mays]
GRMZM2G466309_T01	GRMZM2G466309		not assigned.unknown	seq=cds; coord=5:202304835..202305876:1; parent_gene=GRMZM2G466309	7.72053	GO:0043231//intracellular membrane-bounded organelle	-	-	gi|226529892|ref|NP_001144487.1|/1.88291e-22/uncharacterized protein LOC100277464 [Zea mays]
GRMZM2G466563_T01	GRMZM2G466563		signalling.calcium	moderately similar to ( 260) AT2G18750 | Symbols: | calmodulin-binding protein | chr2:8125827-8128363 FORWARDmoderately similar to ( 466) loc_os08g27170 12008.m06730 protein calmodulin binding protein, putative seq=cds; coord=1:220848986..220851551:-1; parent_gene=GRMZM2G466563	47.6023	-	-	-	gi|242081247|ref|XP_002445392.1|/2.9146e-171/hypothetical protein SORBIDRAFT_07g015090 [Sorghum bicolor]
GRMZM2G466908_T01	GRMZM2G466908		hormone metabolism.auxin.induced-regulated-responsive-activated	weakly similar to ( 128) loc_os06g48850 12006.m09411 protein OsSAUR27 - Auxin-responsive SAUR gene family member seq=cds; coord=6:86559782..86560567:-1; parent_gene=GRMZM2G466908	3.16801	-	-	GO:0050896//response to stimulus	gi|162459692|ref|NP_001105573.1|/1.41366e-47/small auxin up RNA1 [Zea mays]
GRMZM2G467187_T01	GRMZM2G467187		protein.degradation.ubiquitin.E3.RING	weakly similar to ( 145) AT3G05200 | Symbols: ATL6 | ATL6; protein binding / zinc ion binding | chr3:1477377-1478573 FORWARDvery weakly similar to (82.0) EL5_ORYSA E3 ubiquitin-protein ligase EL5 (EC 6.3.2.-) - Oryza sativa (Rice)moderately similar to ( 293) loc_os08g37760 12008.m07761 protein zinc finger, C3HC4 type family protein, expressed seq=cds; coord=1:182168793..182170176:1; parent_gene=G…	2.21436	-	-	-	gi|212721568|ref|NP_001131506.1|/1.78677e-162/uncharacterized protein LOC100192844 precursor [Zea mays]
GRMZM2G467934_T01	GRMZM2G467934		not assigned.unknown	seq=cds; coord=4:167211519..167211791:1; parent_gene=GRMZM2G467934	2.80648	-	-	-	gi|242066058|ref|XP_002454318.1|/4.92537e-12/hypothetical protein SORBIDRAFT_04g028580 [Sorghum bicolor]
[truncated: 57 more rows]
