# Supplementary material for: Transcript profiles of maize embryo sacs and preliminary identification of genes involved in the embryo sac–pollen tube interaction
Source: Front Plant Sci. 2014 Dec 17;5:702. doi: 10.3389/fpls.2014.00702 (PMC4269116; doi:10.3389/fpls.2014.00702)
Supplement: Supplementary file 8 [file DataSheet8.XLS]

## Sheet: Sheet1
			Additional file 8 Genes differentially expressed before and after pollination
GENEID	TRANSCRIPT ID	logFC(ESP/ES)	RPKM(ES)	RPKM(ESP)	RPKM(Nu)	Classification	Description	P-value	FDR
GRMZM2G378762	GRMZM2G378762_T01	36.0244		41.7785		not assigned.unknown	weakly similar to ( 173) loc_os05g23130 12005.m06608 protein expressed protein seq=cds; coord=6:86626810..86628189:1; parent_gene=GRMZM2G378762	8.71327e-77	3.06102e-74
GRMZM2G135165	GRMZM2G135165_T01	35.4345		24.538		not assigned.unknown	very weakly similar to (82.0) AT5G17210 | Symbols: | unknown protein | chr5:5656700-5657970 FORWARDweakly similar to ( 160) loc_os05g35930 12005.m07823 protein expressed protein seq=cds; coord=6:150367837..150369671:-1; parent_gene=GRMZM2G135165	2.09023e-55	3.28387e-53
GRMZM2G074358	GRMZM2G074358_T01	35.2672		25.4726		RNA.regulation of transcription.NAC domain transcription factor family	moderately similar to ( 227) AT2G17040 | Symbols: anac036 | anac036 (Arabidopsis NAC domain containing protein 36); transcription factor | chr2:7407123-7408120 FORWARDweakly similar to ( 147) NAC67_ORYSA NAC domain-containing protein 67 (ONAC067) - Oryza sativa (Rice)moderately similar to ( 349) loc_os06g51070 12006.m09630 protein NAC domain-containing protein 68, putative, expressed seq=cds; coo…	2.77463e-50	3.73306e-48
AC203294.3	AC203294.3_FGT012	35.0688		55.9563	2.41441	not assigned.unknown	weakly similar to ( 114) loc_os01g59410 12001.m12077 protein VQ motif family protein, expressed seq=cds; coord=8:171193955..171194488:1; parent_gene=AC203294.3_FG012	9.60157e-45	1.05592e-42
GRMZM2G023794	GRMZM2G023794_T02	34.5389		10.4478		secondary metabolism.phenylpropanoids.lignin biosynthesis.PAL	moderately similar to ( 381) AT2G37040 | Symbols: pal1, ATPAL1 | pal1 (Phe ammonia lyase 1); phenylalanine ammonia-lyase | chr2:15557602-15560237 REVERSEmoderately similar to ( 486) PAL2_ORYSA Phenylalanine ammonia-lyase (EC 4.3.1.5) - Oryza sativa (Rice)moderately similar to ( 487) loc_os02g41670 12002.m09203 protein phenylalanine ammonia-lyase, putative, expressed seq=cds; coord=1:264665..27089…	1.80922e-32	1.06673e-30
GRMZM2G125448	GRMZM2G125448_T01	33.9748		9.16291		secondary metabolism.phenylpropanoids.lignin biosynthesis.HCT	weakly similar to ( 173) AT5G48930 | Symbols: HCT | HCT (HYDROXYCINNAMOYL-COA SHIKIMATE/QUINATE HYDROXYCINNAMOYL TRANSFERASE); quinate O-hydroxycinnamoyltransferase/ shikimate O-hydroxycinnamoyltransferase/ transferase | chr5:19836654-19838092 REVERSEweakly similar to ( 168) HCBT1_DIACA Anthranilate N-benzoyltransferase protein 1 (EC 2.3.1.144) (Anthranilate N-hydroxycinnamoyl/benzoyltransferase …	7.32441e-23	2.39359e-21
GRMZM2G045155	GRMZM2G045155_T02	33.7395		21.8302		development.unspecified	weakly similar to ( 103) AT3G29970 | Symbols: | germination protein-related | chr3:11745299-11746481 FORWARDweakly similar to ( 138) loc_os07g41340 12007.m08370 protein B12D protein, expressed seq=cds; coord=7:164234834..164235526:1; parent_gene=GRMZM2G045155	9.18053e-20	2.44177e-18
GRMZM2G321394	GRMZM2G321394_T01	33.5405		8.26802		not assigned.unknown	moderately similar to ( 396) AT3G11570 | Symbols: | unknown protein | chr3:3645540-3647328 REVERSEmoderately similar to ( 320) loc_os11g05080 12011.m04706 protein expressed protein seq=cds; coord=2:3772179..3773806:1; parent_gene=GRMZM2G321394	2.15664e-17	4.7559e-16
GRMZM2G114918	GRMZM2G114918_T01	33.4004		5.71247		secondary metabolism.phenylpropanoids	weakly similar to ( 143) AT5G48930 | Symbols: HCT | HCT (HYDROXYCINNAMOYL-COA SHIKIMATE/QUINATE HYDROXYCINNAMOYL TRANSFERASE); quinate O-hydroxycinnamoyltransferase/ shikimate O-hydroxycinnamoyltransferase/ transferase | chr5:19836654-19838092 REVERSEweakly similar to ( 107) HCBT2_DIACA Anthranilate N-benzoyltransferase protein 2 (EC 2.3.1.144) (Anthranilate N-hydroxycinnamoyl/benzoyltransferase …	4.66766e-16	9.29636e-15
GRMZM2G321870	GRMZM2G321870_T01	33.3986		4.60755		cell wall.pectin*esterases.PME	highly similar to ( 516) AT3G05610 | Symbols: | pectinesterase family protein | chr3:1625876-1627976 REVERSEmoderately similar to ( 372) PME3_PHAVU Pectinesterase-3 precursor (EC 3.1.1.11) (Pectin methylesterase 3) (PE 3) - Phaseolus vulgaris (Kidney bean) (French bean)highly similar to ( 875) loc_os03g18860 12003.m07306 protein pectinesterase U1 precursor, putative, expressed seq=cds; coord=1:47…	8.66464e-16	1.67941e-14
GRMZM2G120016	GRMZM2G120016_T01	33.3403		5.78567		misc.UDP glucosyl and glucoronyl transferases	weakly similar to ( 171) AT4G01070 | Symbols: GT72B1, UGT72B1 | GT72B1; UDP-glucosyltransferase/ UDP-glycosyltransferase/ transferase, transferring glycosyl groups | chr4:461858-463300 REVERSEhighly similar to ( 565) CZOG_SORBI Putative cis-zeatin O-glucosyltransferase (EC 2.4.1.215) - Sorghum bicolor (Sorghum) (Sorghum vulgare)highly similar to ( 545) loc_os04g46990 12004.m09645 protein cis-zeat…	2.9968e-15	5.49284e-14
GRMZM2G018108	GRMZM2G018108_T01	33.3089		4.62517		RNA.regulation of transcription.unclassified	moderately similar to ( 349) AT5G10770 | Symbols: | chloroplast nucleoid DNA-binding protein, putative | chr5:3403331-3405331 REVERSEvery weakly similar to (89.7) ASP1_ORYSA Aspartic proteinase Asp1 precursor (EC 3.4.23.-) (OsAsp1) (OSAP1) (Nucellin-like protein) - Oryza sativa (Rice)highly similar to ( 509) loc_os09g30414 12009.m06195 protein aspartic proteinase nepenthesin-2 precursor, putative…	5.58366e-15	9.9111e-14
GRMZM2G333079	GRMZM2G333079_T01	33.3087		4.10767		not assigned.unknown	seq=cds; coord=8:111287695..111290414:-1; parent_gene=GRMZM2G333079	5.58366e-15	9.9111e-14
GRMZM2G461648	GRMZM2G461648_T01	33.1771		7.15092		RNA.regulation of transcription.WRKY domain transcription factor family	weakly similar to ( 132) loc_os11g02470 12011.m04446 protein WRKY transcription factor 38, putative seq=cds; coord=4:184676411..184677679:-1; parent_gene=GRMZM2G461648	6.81384e-14	1.09777e-12
GRMZM2G078389	GRMZM2G078389_T01	33.1074		4.82779		cell.division	weakly similar to ( 152) AT5G03340 | Symbols: | cell division cycle protein 48, putative / CDC48, putative | chr5:810091-813133 REVERSEweakly similar to ( 153) CDC48_SOYBN Cell division cycle protein 48 homolog (Valosin-containing protein homolog) (VCP) - Glycine max (Soybean)moderately similar to ( 286) loc_os08g01590 12008.m080057 protein expressed protein seq=cds; coord=1:220897931..220903033:…	2.39838e-13	3.67665e-12
GRMZM2G173192	GRMZM2G173192_T01	33.0696		5.6678		fermentation.LDH	moderately similar to ( 422) AT4G17260 | Symbols: | L-lactate dehydrogenase, putative | chr4:9674057-9675309 FORWARDhighly similar to ( 528) LDH_MAIZE L-lactate dehydrogenase (EC 1.1.1.27) (LDH) - Zea mays (Maize)highly similar to ( 561) loc_os02g01510 12002.m05501 protein L-lactate dehydrogenase A, putative, expressed seq=cds; coord=5:67473287..67474604:1; parent_gene=GRMZM2G173192	8.48521e-13	1.22293e-11
GRMZM2G028366	GRMZM2G028366_T01	32.9957		2.18872		protein.synthesis.initiation	moderately similar to ( 336) AT1G54270 | Symbols: EIF4A-2 | EIF4A-2; ATP-dependent helicase/ translation initiation factor | chr1:20260495-20262018 FORWARDmoderately similar to ( 350) IF410_TOBAC Eukaryotic initiation factor 4A-10 (EC 3.6.1.-) (ATP-dependent RNA helicase eIF4A-10) (eIF-4A-10) - Nicotiana tabacum (Common tobacco)highly similar to ( 563) loc_os02g12840 12002.m06531 protein helicase…	3.01747e-12	4.10123e-11
GRMZM2G105330	GRMZM2G105330_T01	32.9943		3.46556		lipid metabolism.FA synthesis and FA elongation.acyl coa ligase	highly similar to ( 718) AT5G16370 | Symbols: AAE5 | AAE5 (ACYL ACTIVATING ENZYME 5); catalytic | chr5:5356823-5358481 REVERSEweakly similar to ( 177) 4CL1_TOBAC 4-coumarate--CoA ligase 1 (EC 6.2.1.12) (4CL 1) (4-coumaroyl-CoA synthase 1) - Nicotiana tabacum (Common tobacco)highly similar to ( 995) loc_os04g57850 12004.m10669 protein AMP-binding protein, putative, expressed seq=cds; coord=2:19185…	3.01747e-12	4.10123e-11
GRMZM5G812326	GRMZM5G812326_T01	32.9936		7.68663		not assigned.unknown	weakly similar to ( 108) AT4G24310 | Symbols: | unknown protein | chr4:12600900-12601541 FORWARDmoderately similar to ( 224) loc_os01g29330 12001.m09370 protein expressed protein seq=cds; coord=9:2471961..2472882:1; parent_gene=GRMZM5G812326	3.01747e-12	4.10123e-11
GRMZM2G100776	GRMZM2G100776_T01	32.872		5.08388		not assigned.unknown	moderately similar to ( 266) JI60_HORVU 60 kDa jasmonate-induced protein (EC 3.2.2.22) (rRNA N-glycosidase) - Hordeum vulgare (Barley)very weakly similar to (89.0) loc_os11g06630 12011.m04860 protein ribosome inactivating protein 1, putative seq=cds; coord=8:48630170..48632250:1; parent_gene=GRMZM2G100776	2.04338e-11	2.54732e-10
GRMZM2G132862	GRMZM2G132862_T01	32.7839		9.98267	2.88727	not assigned.unknown	seq=cds; coord=4:236567909..236568522:-1; parent_gene=GRMZM2G132862	1.40021e-10	1.59249e-09
GRMZM2G012636	GRMZM2G012636_T01	32.7401		7.18864		hormone metabolism.auxin.induced-regulated-responsive-activated	weakly similar to ( 145) loc_os09g37470 12009.m06694 protein OsSAUR52 - Auxin-responsive SAUR gene family member, expressed seq=cds; coord=7:147383997..147384822:-1; parent_gene=GRMZM2G012636	1.40021e-10	1.59249e-09
GRMZM2G047448	GRMZM2G047448_T01	32.7389		4.8275		RNA.regulation of transcription.HB,Homeobox transcription factor family	weakly similar to ( 121) AT2G17950 | Symbols: WUS, PGA6, WUS1 | WUS (WUSCHEL); DNA binding / protein binding / transcription factor/ transcription regulator | chr2:7809100-7810671 REVERSEweakly similar to ( 122) WUS_ANTMA Protein WUSCHEL (Protein ROSULATA) - Antirrhinum majus (Garden snapdragon)weakly similar to ( 186) loc_os04g56780 12004.m10565 protein protein WUSCHEL, putative, expressed seq=c…	2.66663e-10	2.92751e-09
GRMZM2G166639	GRMZM2G166639_T01	32.7387		3.71346		hormone metabolism.ethylene.synthesis-degradation	moderately similar to ( 395) AT1G77330 | Symbols: | 1-aminocyclopropane-1-carboxylate oxidase, putative / ACC oxidase, putative | chr1:29063215-29064447 REVERSEmoderately similar to ( 303) ACCO1_MALDO 1-aminocyclopropane-1-carboxylate oxidase 1 (EC 1.14.17.4) (ACC oxidase 1) (Ethylene-forming enzyme) (EFE) (Protein AP4) (PAE12) - Malus domestica (Apple) (Malus sylvestris)highly similar to ( 501) …	2.66663e-10	2.92751e-09
GRMZM2G172537	GRMZM2G172537_T01	32.6918		2.91393	9.80702	misc.beta 1,3 glucan hydrolases	moderately similar to ( 360) AT1G32860 | Symbols: | glycosyl hydrolase family 17 protein | chr1:11907308-11908803 REVERSEmoderately similar to ( 243) GUB_NICPL Lichenase precursor (EC 3.2.1.73) (Endo-beta-1,3-1,4 glucanase) - Nicotiana plumbaginifolia (Leadwort-leaved tobacco)highly similar to ( 564) loc_os03g14210 12003.m06863 protein glucan endo-1,3-beta-glucosidase 7 precursor, putative, expre…	5.08525e-10	5.38186e-09
GRMZM2G337768	GRMZM2G337768_T01	32.6425		2.42883		misc.myrosinases-lectin-jacalin	highly similar to ( 601) AT2G37710 | Symbols: RLK | RLK (receptor lectin kinase); kinase | chr2:15814934-15816961 REVERSEweakly similar to ( 157) PSKR_DAUCA Phytosulfokine receptor precursor (EC 2.7.11.1) (Phytosulfokine LRR receptor kinase) - Daucus carota (Carrot)highly similar to ( 916) loc_os07g03900 12007.m04860 protein lectin-like receptor kinase 7, putative seq=cds; coord=6:120450834..1204…	9.71059e-10	9.95621e-09
GRMZM2G161233	GRMZM2G161233_T01	32.5924		3.32911	1.10042	cell wall.precursor synthesis.GAE	moderately similar to ( 483) AT3G23820 | Symbols: GAE6 | GAE6 (UDP-D-GLUCURONATE 4-EPIMERASE 6); UDP-glucuronate 4-epimerase/ catalytic | chr3:8603645-8605027 FORWARDhighly similar to ( 659) loc_os08g41440 12008.m08122 protein NAD-dependent epimerase/dehydratase family protein, putative, expressed seq=cds; coord=1:192730986..192732596:-1; parent_gene=GRMZM2G161233	1.8568e-09	1.83891e-08
GRMZM2G018673	GRMZM2G018673_T01	32.5402		6.41644		not assigned.unknown	seq=cds; coord=4:225711895..225713017:-1; parent_gene=GRMZM2G018673	3.55526e-09	3.39731e-08
GRMZM2G036980	GRMZM2G036980_T01	32.5394		4.85601		not assigned.unknown	seq=cds; coord=8:120149428..120150492:-1; parent_gene=GRMZM2G036980	3.55526e-09	3.39731e-08
GRMZM2G141638	GRMZM2G141638_T01	32.4868		2.34138		RNA.regulation of transcription.AP2/EREBP, APETALA2/Ethylene-responsive element binding protein family	moderately similar to ( 354) AT5G17430 | Symbols: BBM | BBM (BABY BOOM); DNA binding / transcription factor | chr5:5742542-5745568 REVERSEmoderately similar to ( 353) BBM2_BRANA Protein BABY BOOM 2 (BnBBM2) - Brassica napus (Rape)highly similar to ( 676) loc_os01g67410 12001.m12845 protein AP2/EREBP transcription factor BABY BOOM, putative, expressed seq=cds; coord=3:166793199..166797020:1; paren…	6.81664e-09	6.31053e-08
GRMZM2G124667	GRMZM2G124667_T01	32.429		4.84672		misc.plastocyanin-like	weakly similar to ( 108) AT1G48940 | Symbols: | plastocyanin-like domain-containing protein | chr1:18105808-18106422 REVERSEweakly similar to ( 126) loc_os06g17730 12006.m06485 protein blue copper protein precursor, putative, expressed seq=cds; coord=4:164089536..164090676:-1; parent_gene=GRMZM2G124667	1.30877e-08	1.16934e-07
GRMZM2G151216	GRMZM2G151216_T01	32.4283		2.07207		signalling.receptor kinases.leucine rich repeat III	moderately similar to ( 430) AT1G50610 | Symbols: | leucine-rich repeat transmembrane protein kinase, putative | chr1:18742171-18744501 FORWARDweakly similar to ( 114) KPRO_MAIZE Putative receptor protein kinase ZmPK1 precursor (EC 2.7.11.1) - Zea mays (Maize)highly similar to ( 770) loc_os08g40990 12008.m08078 protein receptor-like protein kinase 1, putative, expressed seq=cds; coord=1:190094277…	1.30877e-08	1.16934e-07
GRMZM2G300771	GRMZM2G300771_T01	32.4281		3.29564	4.6585	protein.postranslational modification	moderately similar to ( 256) AT3G25250 | Symbols: AGC2-1, AGC2, OXI1 | AGC2-1 (OXIDATIVE SIGNAL-INDUCIBLE1); kinase | chr3:9195566-9196949 FORWARDweakly similar to ( 142) KPK1_PHAVU Protein kinase PVPK-1 (EC 2.7.11.1) - Phaseolus vulgaris (Kidney bean) (French bean)moderately similar to ( 400) loc_os02g39090 12002.m08997 protein protein kinase, putative, expressed seq=cds; coord=5:182032083..1820…	1.30877e-08	1.16934e-07
GRMZM2G061751	GRMZM2G061751_T01	32.37		2.44653	3.77388	not assigned.unknown	weakly similar to ( 140) AT1G29300 | Symbols: UNE1 | UNE1 (unfertilized embryo sac 1) | chr1:10248120-10249499 REVERSEmoderately similar to ( 291) loc_os05g11650 12005.m05634 protein expressed protein seq=cds; coord=6:131356659..131358537:1; parent_gene=GRMZM2G061751	2.51623e-08	2.14728e-07
GRMZM2G462258	GRMZM2G462258_T01	32.37		4.72945		major CHO metabolism.degradation.starch.starch cleavage	weakly similar to ( 117) AT5G18670 | Symbols: BMY3, BAM9 | BMY3; beta-amylase/ catalytic/ cation binding | chr5:6226138-6227999 FORWARDweakly similar to ( 186) loc_os03g22790 12003.m07677 protein beta-amylase, putative, expressed seq=cds; coord=2:19253013..19255143:-1; parent_gene=GRMZM2G462258	2.51623e-08	2.14728e-07
GRMZM2G404081	GRMZM2G404081_T01	32.3087		2.99489		not assigned.unknown	moderately similar to ( 354) AT1G29050 | Symbols: | unknown protein | chr1:10136376-10139082 REVERSEmoderately similar to ( 483) loc_os06g34060 12006.m07942 protein expressed protein seq=cds; coord=6:106425279..106427173:1; parent_gene=GRMZM2G404081	4.84437e-08	3.96548e-07
GRMZM2G013884	GRMZM2G013884_T01	32.2445		3.45405		signalling.receptor kinases.wheat LRK10 like	moderately similar to ( 333) loc_os01g04440 12001.m07079 protein conserved hypothetical protein seq=cds; coord=3:20377265..20378484:1; parent_gene=GRMZM2G013884	1.80309e-07	1.34654e-06
GRMZM2G092003	GRMZM2G092003_T01	32.2443		2.86078		not assigned.unknown	weakly similar to ( 129) AT1G49330 | Symbols: | hydroxyproline-rich glycoprotein family protein | chr1:18250043-18251038 FORWARDweakly similar to ( 175) loc_os05g47590 12005.m08831 protein conserved hypothetical protein seq=cds; coord=8:63893483..63894955:-1; parent_gene=GRMZM2G092003	1.80309e-07	1.34654e-06
GRMZM2G174782	GRMZM2G174782_T01	32.2442		2.70471	1.75851	misc.GDSL-motif lipase	weakly similar to ( 169) loc_os11g03520 12011.m04548 protein acyltransferase/ carboxylic ester hydrolase/ lipase, putative, expressed seq=cds; coord=4:185725611..185727980:-1; parent_gene=GRMZM2G174782	1.80309e-07	1.34654e-06
GRMZM2G175243	GRMZM2G175243_T01	32.244		5.55928	4.67753	not assigned.unknown	seq=cds; coord=9:36386035..36386792:1; parent_gene=GRMZM2G175243	1.80309e-07	1.34654e-06
GRMZM2G010290	GRMZM2G010290_T02	32.178		3.02891	2.42714	RNA.regulation of transcription.C2C2(Zn) DOF zinc finger family	weakly similar to ( 136) AT4G24060 | Symbols: | Dof-type zinc finger domain-containing protein | chr4:12503970-12505417 FORWARDweakly similar to ( 123) PBF_MAIZE Dof zinc finger protein PBF (Prolamin box-binding factor) - Zea mays (Maize)moderately similar to ( 294) loc_os04g47990 12004.m35186 protein dof zinc finger protein, putative, expressed seq=cds; coord=10:137204209..137206460:1; parent_ge…	3.48591e-07	2.48724e-06
GRMZM2G105587	GRMZM2G105587_T01	32.1777		5.0852	66.217	not assigned.unknown	seq=cds; coord=8:5997392..5998182:1; parent_gene=GRMZM2G105587	3.48591e-07	2.48724e-06
GRMZM2G406313	GRMZM2G406313_T01	32.1777		4.27914		misc.protease inhibitor/seed storage/lipid transfer protein (LTP) family protein	weakly similar to ( 129) AT2G45180 | Symbols: | protease inhibitor/seed storage/lipid transfer protein (LTP) family protein | chr2:18626377-18626781 FORWARDweakly similar to ( 127) 14KD_DAUCA 14 kDa proline-rich protein DC2.15 precursor - Daucus carota (Carrot)weakly similar to ( 176) loc_os02g44310 12002.m09471 protein cortical cell-delineating protein precursor, putative, expressed seq=cds; coo…	3.48591e-07	2.48724e-06
GRMZM5G814718	GRMZM5G814718_T01	32.1771		1.77432	5.54505	secondary metabolism.simple phenols	highly similar to ( 700) AT2G40370 | Symbols: LAC5 | LAC5 (laccase 5); laccase | chr2:16858192-16860593 REVERSEweakly similar to ( 196) ASO_CUCMA L-ascorbate oxidase precursor (EC 1.10.3.3) (Ascorbase) (ASO) - Cucurbita maxima (Pumpkin) (Winter squash)highly similar to ( 952) loc_os03g18640 12003.m07285 protein multicopper oxidase family protein, expressed seq=cds; coord=1:46411401..46414414:1; p…	3.48591e-07	2.48724e-06
GRMZM2G338056	GRMZM2G338056_T01	32.1081		6.80435		RNA.regulation of transcription.C2H2 zinc finger family	very weakly similar to (81.6) loc_os11g47630 12011.m08563 protein zinc finger DNA-binding protein, putative, expressed seq=cds; coord=9:16478702..16479264:1; parent_gene=GRMZM2G338056	6.74877e-07	4.58264e-06
GRMZM2G334734	GRMZM2G334734_T01	32.1079		5.88456		not assigned.unknown	weakly similar to ( 134) AT1G09310 | Symbols: | unknown protein | chr1:3009109-3009648 FORWARDmoderately similar to ( 251) loc_os07g02850 12007.m04756 protein expressed protein seq=cds; coord=2:4414922..4415572:-1; parent_gene=GRMZM2G334734	6.74877e-07	4.58264e-06
GRMZM2G162505	GRMZM2G162505_T01	32.1077		3.32539		PS.calvin cycle.rubisco interacting	very weakly similar to (85.9) RUAP_SOYBN RuBisCO-associated protein - Glycine max (Soybean)highly similar to ( 503) loc_os10g28050 12010.m05688 protein chitinase 2, putative, expressed seq=cds; coord=1:240766113..240767264:1; parent_gene=GRMZM2G162505	6.74877e-07	4.58264e-06
GRMZM2G059700	GRMZM2G059700_T01	32.0335		1.79453		not assigned.unknown	highly similar to ( 817) loc_os01g52900 12001.m11463 protein expressed protein seq=cds; coord=3:201092983..201095214:1; parent_gene=GRMZM2G059700	1.30841e-06	8.44691e-06
GRMZM2G106026	GRMZM2G106026_T01	32.0333		3.86338		RNA.regulation of transcription.C2H2 zinc finger family	very weakly similar to (97.8) AT5G04340 | Symbols: C2H2, CZF2, ZAT6 | ZAT6 (ZINC FINGER OF ARABIDOPSIS THALIANA 6); nucleic acid binding / transcription factor/ zinc ion binding | chr5:1216321-1217037 REVERSEvery weakly similar to (92.4) ZFP1_WHEAT Zinc-finger protein 1 (WZF1) - Triticum aestivum (Wheat)weakly similar to ( 197) loc_os03g32230 12003.m08467 protein zinc-finger protein 1, putative, …	1.30841e-06	8.44691e-06
GRMZM2G334660	GRMZM2G334660_T01	9.82074	0.235679	189.487		secondary metabolism.phenylpropanoids.lignin biosynthesis.PAL	nearly identical (1058) AT2G37040 | Symbols: pal1, ATPAL1 | pal1 (Phe ammonia lyase 1); phenylalanine ammonia-lyase | chr2:15557602-15560237 REVERSEnearly identical (1301) PAL2_ORYSA Phenylalanine ammonia-lyase (EC 4.3.1.5) - Oryza sativa (Rice)nearly identical (1308) loc_os02g41670 12002.m09203 protein phenylalanine ammonia-lyase, putative, expressed seq=cds; coord=5:186732964..186735665:-1; par…	1.03791e-282	8.75095e-279
GRMZM2G125482	GRMZM2G125482_T01	9.3623	0.915906	536.86		misc.cytochrome P450	moderately similar to ( 397) AT5G07990 | Symbols: TT7, CYP75B1, D501 | TT7 (TRANSPARENT TESTA 7); flavonoid 3-monooxygenase/ oxygen binding | chr5:2560437-2562859 FORWARDmoderately similar to ( 405) F3PH_PETHY Flavonoid 3-monooxygenase (EC 1.14.13.21) (Flavonoid 3-hydroxylase) (Cytochrome P450 75B2) - Petunia hybrida (Petunia)highly similar to ( 893) loc_os09g26960 12009.m05848 protein flavonoid …	0	0
GRMZM2G080887	GRMZM2G080887_T01	8.62271	0.493392	173.437	5.16118	transport.metabolite transporters at the mitochondrial membrane	moderately similar to ( 463) AT4G27970 | Symbols: SLAH2 | SLAH2 (SLAC1 HOMOLOGUE 2); transporter | chr4:13918290-13920122 REVERSEhighly similar to ( 645) loc_os05g50770 12005.m83963 protein C4-dicarboxylate transporter/malic acid transport protein, expressed seq=cds; coord=6:166947620..166949623:-1; parent_gene=GRMZM2G080887	1.40596e-232	5.08032e-229
GRMZM2G072529	GRMZM2G072529_T01	8.19827	0.245871	64.1926	1.24449	hormone metabolism.ethylene.synthesis-degradation	moderately similar to ( 395) AT1G77330 | Symbols: | 1-aminocyclopropane-1-carboxylate oxidase, putative / ACC oxidase, putative | chr1:29063215-29064447 REVERSEmoderately similar to ( 308) ACCO1_MALDO 1-aminocyclopropane-1-carboxylate oxidase 1 (EC 1.14.17.4) (ACC oxidase 1) (Ethylene-forming enzyme) (EFE) (Protein AP4) (PAE12) - Malus domestica (Apple) (Malus sylvestris)highly similar to ( 510) …	1.30411e-100	8.24654e-98
GRMZM2G170692	GRMZM2G170692_T01	7.88445	0.741333	156.014	1.43839	secondary metabolism.phenylpropanoids.lignin biosynthesis.PAL	nearly identical (1061) AT2G37040 | Symbols: pal1, ATPAL1 | pal1 (Phe ammonia lyase 1); phenylalanine ammonia-lyase | chr2:15557602-15560237 REVERSEnearly identical (1318) PAL2_ORYSA Phenylalanine ammonia-lyase (EC 4.3.1.5) - Oryza sativa (Rice)nearly identical (1320) loc_os02g41670 12002.m09203 protein phenylalanine ammonia-lyase, putative, expressed seq=cds; coord=5:186795550..186798126:1; pare…	4.86988e-249	2.46357e-245
GRMZM2G466563	GRMZM2G466563_T01	7.63383	0.269148	47.6023		signalling.calcium	moderately similar to ( 260) AT2G18750 | Symbols: | calmodulin-binding protein | chr2:8125827-8128363 FORWARDmoderately similar to ( 466) loc_os08g27170 12008.m06730 protein calmodulin binding protein, putative seq=cds; coord=1:220848986..220851551:-1; parent_gene=GRMZM2G466563	3.15346e-75	1.06351e-72
AC191070.3	AC191070.3_FGT006	6.95544	0.471009	51.758		not assigned.unknown	seq=cds; coord=4:42444474..42446902:-1; parent_gene=AC191070.3_FG006	1.60526e-71	4.61404e-69
GRMZM2G365188	GRMZM2G365188_T01	6.89209	0.499324	52.8669		hormone metabolism.auxin.induced-regulated-responsive-activated	very weakly similar to (99.8) loc_os04g56690 12004.m10556 protein OsSAUR23 - Auxin-responsive SAUR gene family member, expressed seq=cds; coord=2:3564744..3566656:1; parent_gene=GRMZM2G365188	3.51017e-115	3.17094e-112
GRMZM2G160924	GRMZM2G160924_T01	6.64626	0.409784	36.4843		not assigned.unknown	moderately similar to ( 276) loc_os10g10320 12010.m04368 protein conserved hypothetical protein seq=cds; coord=4:190262956..190263824:-1; parent_gene=GRMZM2G160924	5.40473e-43	5.42489e-41
GRMZM2G167613	GRMZM2G167613_T02	6.55567	1.34631	112.577		secondary metabolism.phenylpropanoids.lignin biosynthesis.CAD	moderately similar to ( 373) AT4G39330 | Symbols: ATCAD9, CAD9 | CAD9 (CINNAMYL ALCOHOL DEHYDROGENASE 9); binding / catalytic/ oxidoreductase/ zinc ion binding | chr4:18291268-18292740 FORWARDmoderately similar to ( 366) MTDH_FRAAN Probable mannitol dehydrogenase (EC 1.1.1.255) (NAD-dependent mannitol dehydrogenase) - Fragaria ananassa (Strawberry)highly similar to ( 533) loc_os04g15920 12004.m06…	5.65586e-149	8.94121e-146
GRMZM2G052422	GRMZM2G052422_T01	6.54462	0.11025	9.15266	1.78573	hormone metabolism.ethylene.synthesis-degradation.1-aminocyclopropane-1-carboxylate oxidase	moderately similar to ( 392) AT1G05010 | Symbols: EFE, ACO4, EAT1 | EFE (ETHYLENE-FORMING ENZYME); 1-aminocyclopropane-1-carboxylate oxidase | chr1:1431419-1432695 REVERSEmoderately similar to ( 423) ACCO1_ORYSA 1-aminocyclopropane-1-carboxylate oxidase 1 (EC 1.14.17.4) (ACC oxidase 1) (Ethylene-forming enzyme) (EFE) - Oryza sativa (Rice)highly similar to ( 518) loc_os02g53180 12002.m33892 protei…	7.75593e-22	2.3526e-20
GRMZM2G066950	GRMZM2G066950_T01	6.48106	0.077849	6.18181		misc.invertase/pectin methylesterase inhibitor family protein	very weakly similar to (96.7) AT3G36659 | Symbols: | invertase/pectin methylesterase inhibitor family protein | chr3:2100189-2100983 FORWARDweakly similar to ( 155) loc_os11g45220 12011.m08355 protein IWS1-like protein A, putative, expressed seq=cds; coord=2:230872984..230875028:-1; parent_gene=GRMZM2G066950	4.60669e-21	1.33473e-19
GRMZM2G431288	GRMZM2G431288_T01	6.29613	23.5118	1640.81	29.5841	misc.cytochrome P450	moderately similar to ( 395) AT5G07990 | Symbols: TT7, CYP75B1, D501 | TT7 (TRANSPARENT TESTA 7); flavonoid 3-monooxygenase/ oxygen binding | chr5:2560437-2562859 FORWARDmoderately similar to ( 401) F3PH_PETHY Flavonoid 3-monooxygenase (EC 1.14.13.21) (Flavonoid 3-hydroxylase) (Cytochrome P450 75B2) - Petunia hybrida (Petunia)highly similar to ( 885) loc_os09g26960 12009.m05848 protein flavonoid …	0	0
GRMZM2G010868	GRMZM2G010868_T01	6.29408	0.186856	13.0393	1.70242	lipid metabolism.lipid transfer proteins etc	very weakly similar to (96.3) AT2G38540 | Symbols: LP1, LTP1, ATLTP1 | LP1; calmodulin binding | chr2:16130418-16130893 FORWARDweakly similar to ( 157) NLTP_MAIZE Nonspecific lipid-transfer protein precursor (LTP) (Phospholipid transfer protein) (PLTP) (Allergen Zea m 14) - Zea mays (Maize)weakly similar to ( 143) loc_os11g24070 12011.m06333 protein nonspecific lipid-transfer protein 1 precursor,…	7.934e-35	5.38023e-33
GRMZM2G349749	GRMZM2G349749_T01	6.01742	1.596	92.1709		development.storage proteins	moderately similar to ( 440) AT2G26560 | Symbols: PLP2, PLA IIA, PLA2A | PLA2A (PHOSPHOLIPASE A 2A); lipase/ nutrient reservoir | chr2:11293912-11295708 REVERSEmoderately similar to ( 297) PAT0_SOLTU Patatin precursor (Potato tuber protein) - Solanum tuberosum (Potato)highly similar to ( 578) loc_os08g37180 12008.m07704 protein patatin T5 precursor, putative, expressed seq=cds; coord=1:200159715.…	2.05354e-136	2.47344e-133
GRMZM2G417835	GRMZM2G417835_T01	5.96067	0.406125	22.4769	1.02782	not assigned.unknown	weakly similar to ( 108) loc_os05g32460 12005.m07479 protein VQ motif family protein, expressed seq=cds; coord=1:14384994..14386612:1; parent_gene=GRMZM2G417835	1.04514e-26	4.37679e-25
GRMZM2G401970	GRMZM2G401970_T01	5.92894	0.471009	25.5012		glycolysis.unclear/dually targeted.phosphofructokinase (PFK)	highly similar to ( 686) AT4G26270 | Symbols: PFK3 | PFK3 (PHOSPHOFRUCTOKINASE 3); 6-phosphofructokinase | chr4:13301094-13304030 REVERSEvery weakly similar to (80.9) PFPB_RICCO Pyrophosphate--fructose 6-phosphate 1-phosphotransferase subunit beta (EC 2.7.1.90) (PFP) (6-phosphofructokinase, pyrophosphate dependent) (Pyrophosphate-dependent 6-phosphofructose-1-kinase) (PPi-PFK) - Ricinus communis …	2.00089e-68	5.11216e-66
GRMZM2G032856	GRMZM2G032856_T01	5.91275	1.60945	86.1699		misc.glutathione S transferases	weakly similar to ( 192) AT3G09270 | Symbols: ATGSTU8 | ATGSTU8 (GLUTATHIONE S-TRANSFERASE TAU 8); glutathione transferase | chr3:2848407-2849226 REVERSEweakly similar to ( 200) GSTX3_TOBAC Probable glutathione S-transferase (EC 2.5.1.18) (Auxin-induced protein PCNT103) - Nicotiana tabacum (Common tobacco)moderately similar to ( 302) loc_os01g72150 12001.m13251 protein glutathione S-transferase, …	6.17048e-109	4.59047e-106
GRMZM2G063917	GRMZM2G063917_T01	5.80597	3.78416	188.721		secondary metabolism.phenylpropanoids.lignin biosynthesis.PAL	nearly identical (1009) AT2G37040 | Symbols: pal1, ATPAL1 | pal1 (Phe ammonia lyase 1); phenylalanine ammonia-lyase | chr2:15557602-15560237 REVERSEnearly identical (1241) PAL2_ORYSA Phenylalanine ammonia-lyase (EC 4.3.1.5) - Oryza sativa (Rice)nearly identical (1241) loc_os02g41670 12002.m09203 protein phenylalanine ammonia-lyase, putative, expressed seq=cds; coord=4:143512171..143515157:1; pare…	8.91403e-235	3.75786e-231
GRMZM2G309071	GRMZM2G309071_T01	5.79342	0.114205	5.6336		not assigned.unknown	moderately similar to ( 246) loc_os01g51640 12001.m11342 protein expressed protein seq=cds; coord=6:137492142..137494245:-1; parent_gene=GRMZM2G309071	1.27755e-13	1.99472e-12
GRMZM2G154872	GRMZM2G154872_T01	5.72251	0.102512	4.81015		protein.degradation.ubiquitin.E3.SCF.FBOX	highly similar to ( 552) loc_os06g49340 12006.m09458 protein F-box domain containing protein, expressed seq=cds; coord=6:86182097..86183649:-1; parent_gene=GRMZM2G154872	9.73443e-12	1.2601e-10
GRMZM2G178102	GRMZM2G178102_T01	5.64552	0.04836	2.15282	9.30157	RNA.regulation of transcription.HB,Homeobox transcription factor family	nearly identical (1162) AT2G34710 | Symbols: PHB, ATHB14, ATHB-14, PHB-1D | PHB (PHABULOSA); DNA binding / transcription factor | chr2:14639548-14643993 REVERSEnearly identical (1449) loc_os12g41860 12012.m07967 protein class III HD-Zip protein 4, putative, expressed seq=cds; coord=3:123263423..123270240:-1; parent_gene=GRMZM2G178102	6.11712e-11	7.22683e-10
GRMZM2G700208	GRMZM2G700208_T01	5.63286	2.57871	113.652	2.61047	misc.GDSL-motif lipase	weakly similar to ( 152) AT1G71250 | Symbols: | GDSL-motif lipase/hydrolase family protein | chr1:26860125-26861582 FORWARDweakly similar to ( 136) APG_BRANA Anter-specific proline-rich protein APG (Protein CEX) (Fragment) - Brassica napus (Rape)moderately similar to ( 300) loc_os12g37910 12012.m07577 protein GDSL-motif lipase/hydrolase-like protein, putative, expressed seq=cds; coord=10:33349087…	6.88249e-124	6.96343e-121
GRMZM2G002104	GRMZM2G002104_T01	5.5571	0.850775	35.6983		not assigned.unknown	moderately similar to ( 265) AT3G50340 | Symbols: | unknown protein | chr3:18665333-18666544 REVERSEmoderately similar to ( 450) loc_os09g28340 12009.m05985 protein expressed protein seq=cds; coord=2:186174995..186176491:-1; parent_gene=GRMZM2G002104	2.65546e-68	6.71673e-66
GRMZM2G089982	GRMZM2G089982_T01	5.52277	1.04239	42.527	5.37207	misc.peroxidases	moderately similar to ( 442) AT5G66390 | Symbols: | peroxidase 72 (PER72) (P72) (PRXR8) | chr5:26516063-26517329 REVERSEmoderately similar to ( 310) PER1_ARAHY Cationic peroxidase 1 precursor (EC 1.11.1.7) (PNPC1) - Arachis hypogaea (Peanut)highly similar to ( 583) loc_os01g15830 12001.m08181 protein peroxidase 72 precursor, putative, expressed seq=cds; coord=3:40528179..40530723:-1; parent_gene=…	2.56183e-83	1.07998e-80
GRMZM2G447984	GRMZM2G447984_T01	5.48199	0.189525	7.52489	1.15116	DNA.synthesis/chromatin structure.histone	moderately similar to ( 228) AT5G65360 | Symbols: | histone H3 | chr5:26120099-26120509 REVERSEmoderately similar to ( 226) H32_WHEAT Histone H3.2 - Triticum aestivum (Wheat)moderately similar to ( 228) loc_os11g05730 12011.m04769 protein histone H3, putative, expressed seq=cds; coord=2:54484066..54484905:-1; parent_gene=GRMZM2G447984	3.87605e-11	4.67752e-10
GRMZM2G093418	GRMZM2G093418_T01	5.48011	0.179079	7.11013		development.late embryogenesis abundant	very weakly similar to (96.7) AT2G46150 | Symbols: | FUNCTIONS IN: molecular_function unknown; INVOLVED IN: biological_process unknown; LOCATED IN: plasma membrane; EXPRESSED IN: 15 plant structures; EXPRESSED DURING: 7 growth stages; CONTAINS InterPro DOMAIN/s: Harpin-induced 1 (InterPro:IPR010847); BEST Arabidopsis thaliana protein match is: unknown protein (TAIR:AT3G54200.1); Has 137 Blast hit…	7.1685e-10	7.44641e-09
GRMZM2G089273	GRMZM2G089273_T01	5.47993	0.525416	20.8611		hormone metabolism.auxin.induced-regulated-responsive-activated	seq=cds; coord=2:9606505..9606807:-1; parent_gene=GRMZM2G089273	7.1685e-10	7.44641e-09
GRMZM2G093125	GRMZM2G093125_T01	5.45766	0.167668	6.55622		secondary metabolism.N misc.alkaloid-like	moderately similar to ( 493) AT2G20340 | Symbols: | tyrosine decarboxylase, putative | chr2:8779804-8782490 FORWARDhighly similar to ( 510) TYDC2_PETCR Tyrosine decarboxylase 2 (EC 4.1.1.25) - Petroselinum crispum (Parsley) (Petroselinum hortense)highly similar to ( 803) loc_os01g56380 12001.m11794 protein tyrosine/DOPA decarboxylase 2, putative, expressed seq=cds; coord=1:17855665..17857563:1; p…	1.51946e-20	4.2942e-19
GRMZM2G125023	GRMZM2G125023_T01	5.43571	0.127107	4.8937		transport.Major Intrinsic Proteins.TIP	moderately similar to ( 352) AT4G17340 | Symbols: TIP2;2, DELTA-TIP2 | TIP2;2 (TONOPLAST INTRINSIC PROTEIN 2;2); water channel | chr4:9699318-9700250 FORWARDmoderately similar to ( 412) TIP21_ORYSA Probable aquaporin TIP2.1 (Tonoplast intrinsic protein 2.1) (OsTIP2.1) - Oryza sativa (Rice)moderately similar to ( 412) loc_os02g44080 12002.m09443 protein aquaporin TIP2.1, putative, expressed seq=cd…	9.11467e-19	2.2647e-17
GRMZM5G852177	GRMZM5G852177_T01	5.39067	0.195339	7.28567		signalling.receptor kinases.DUF 26	moderately similar to ( 412) AT1G16670 | Symbols: | protein kinase family protein | chr1:5697846-5699492 FORWARDmoderately similar to ( 208) NORK_MEDTR Nodulation receptor kinase precursor (EC 2.7.11.1) (Does not make infections protein 2) (Symbiosis receptor-like kinase) (MtSYMRK) - Medicago truncatula (Barrel medic)highly similar to ( 583) loc_os12g41710 12012.m56502 protein serine/threonine-pr…	2.95242e-18	7.03188e-17
GRMZM2G062151	GRMZM2G062151_T01	5.36713	0.162285	5.9552	7.96774	misc.cytochrome P450	highly similar to ( 744) AT4G00360 | Symbols: CYP86A2, ATT1 | CYP86A2 (CYTOCHROME P450 86 A2); fatty acid (omega-1)-hydroxylase/ oxygen binding | chr4:160951-162778 FORWARDvery weakly similar to (99.8) C75A1_PETHY Flavonoid 3,5-hydroxylase 1 (EC 1.14.13.88) (F35H) (Cytochrome P450 75A1) (CYPLXXVA1) - Petunia hybrida (Petunia)highly similar to ( 971) loc_os02g44654 12002.m100306 protein cytochrome…	5.32138e-18	1.24513e-16
GRMZM2G047296	GRMZM2G047296_T01	5.34322	0.191348	6.90658	2.71186	not assigned.unknown	weakly similar to ( 141) loc_os06g05730 12006.m05299 protein expressed protein seq=cds; coord=6:74033120..74033951:1; parent_gene=GRMZM2G047296	8.48998e-09	7.74416e-08
AC209636.2	AC209636.2_FGT003	5.3427	11.7927	425.473		Biodegradation of Xenobiotics	weakly similar to ( 142) AT5G16080 | Symbols: AtCXE17 | AtCXE17 (Arabidopsis thaliana carboxyesterase 17); hydrolase | chr5:5252533-5253567 REVERSEmoderately similar to ( 468) loc_os05g33940 12005.m07626 protein hsr203J, putative, expressed seq=cds; coord=6:146567633..146568712:1; parent_gene=AC209636.2_FG003	1.62319e-205	5.13212e-202
GRMZM2G141353	GRMZM2G141353_T01	5.34269	0.147682	5.3305	2.24251	stress.biotic	weakly similar to ( 137) loc_os05g50500 12005.m09119 protein expressed protein seq=cds; coord=8:74660833..74661910:-1; parent_gene=GRMZM2G141353	8.48998e-09	7.74416e-08
GRMZM2G075140	GRMZM2G075140_T01	5.29441	0.433791	15.1355		lipid metabolism.FA synthesis and FA elongation.beta ketoacyl CoA synthase	moderately similar to ( 293) AT1G04220 | Symbols: KCS2 | KCS2 (3-KETOACYL-COA SYNTHASE 2); fatty acid elongase | chr1:1119853-1122483 REVERSEmoderately similar to ( 350) loc_os11g37900 12011.m07636 protein fatty acid elongase, putative, expressed seq=cds; coord=4:9739340..9742575:1; parent_gene=GRMZM2G075140	6.53175e-24	2.27255e-22
GRMZM2G081582	GRMZM2G081582_T01	5.24059	3.5035	117.883	5.7107	secondary metabolism.phenylpropanoids.lignin biosynthesis.PAL	nearly identical (1028) AT2G37040 | Symbols: pal1, ATPAL1 | pal1 (Phe ammonia lyase 1); phenylalanine ammonia-lyase | chr2:15557602-15560237 REVERSEnearly identical (1195) PAL2_ORYSA Phenylalanine ammonia-lyase (EC 4.3.1.5) - Oryza sativa (Rice)nearly identical (1257) loc_os02g41650 12002.m33781 protein phenylalanine ammonia-lyase, putative, expressed seq=cds; coord=4:143464625..143469700:-1; par…	9.23894e-177	2.12445e-173
GRMZM2G015872	GRMZM2G015872_T01	5.19201	0.127975	4.15727	1.55462	not assigned.unknown	weakly similar to ( 136) AT5G48270 | Symbols: | unknown protein | chr5:19564744-19565712 REVERSEmoderately similar to ( 353) loc_os05g01790 12005.m04716 protein expressed protein seq=cds; coord=6:39660943..39662186:-1; parent_gene=GRMZM2G015872	5.45093e-08	4.42335e-07
GRMZM2G313104	GRMZM2G313104_T01	5.19201	0.273542	8.88599		not assigned.unknown	seq=cds; coord=1:72040893..72042056:-1; parent_gene=GRMZM2G313104	6.1339e-16	1.20179e-14
GRMZM2G387341	GRMZM2G387341_T01	5.19053	0.257191	8.35484	1.04143	not assigned.unknown	seq=cds; coord=5:23888854..23889472:-1; parent_gene=GRMZM2G387341	3.55526e-09	3.39731e-08
GRMZM2G009465	GRMZM2G009465_T01	5.18383	0.446776	14.4239		cell wall.cell wall proteins.proline rich proteins	weakly similar to ( 192) loc_os10g05980 12010.m03998 protein proline-rich protein, putative, expressed seq=cds; coord=1:120192918..120195211:1; parent_gene=GRMZM2G009465	7.60868e-43	7.57692e-41
GRMZM2G341309	GRMZM2G341309_T01	5.16433	0.296188	9.44349		not assigned.unknown	weakly similar to ( 142) loc_os03g15080 12003.m06945 protein expressed protein seq=cds; coord=1:35768410..35771730:1; parent_gene=GRMZM2G341309	1.11508e-15	2.14159e-14
GRMZM2G094860	GRMZM2G094860_T01	5.13712	0.0904039	2.828		not assigned.unknown	moderately similar to ( 353) AT4G00910 | Symbols: | unknown protein | chr4:389370-391287 REVERSEhighly similar to ( 578) loc_os04g47930 12004.m09733 protein ALMT1, putative, expressed seq=cds; coord=10:137281069..137283152:1; parent_gene=GRMZM2G094860	1.01396e-07	7.8866e-07
GRMZM2G125571	GRMZM2G125571_T01	5.13661	0.389562	12.1862		signalling.receptor kinases.legume-lectin	very weakly similar to (98.2) loc_os09g16650 12009.m04925 protein seed agglutinin I precursor, putative seq=cds; coord=3:219063340..219064565:1; parent_gene=GRMZM2G125571	8.6388e-23	2.81585e-21
GRMZM2G173105	GRMZM2G173105_T01	5.04159	0.260701	7.63243		misc.nitrilases, *nitrile lyases, berberine bridge enzymes, reticuline oxidases, troponine reductases	moderately similar to ( 358) AT5G44400 | Symbols: | FAD-binding domain-containing protein | chr5:17886365-17888071 REVERSEhighly similar to ( 615) loc_os11g30310 12011.m06940 protein reticuline oxidase precursor, putative seq=cds; coord=4:17740852..17742683:-1; parent_gene=GRMZM2G173105	1.52142e-21	4.54341e-20
GRMZM2G129304	GRMZM2G129304_T01	5.02266	0.311701	9.00053		amino acid metabolism.misc	moderately similar to ( 379) AT1G69040 | Symbols: ACR4 | ACR4 (ACT REPEAT 4); amino acid binding | chr1:25957843-25960079 FORWARDhighly similar to ( 605) loc_os08g42080 12008.m08186 protein ACR5, putative, expressed seq=cds; coord=4:45846905..45849999:-1; parent_gene=GRMZM2G129304	1.13789e-27	5.17658e-26
GRMZM2G390236	GRMZM2G390236_T01	5.02141	0.198505	5.73195		not assigned.unknown	weakly similar to ( 105) loc_os01g03130 12001.m06952 protein expressed protein seq=cds; coord=3:25309307..25310108:-1; parent_gene=GRMZM2G390236	2.51623e-08	2.14728e-07
GRMZM2G097469	GRMZM2G097469_T01	5.02128	0.209751	6.05668		lipid metabolism.FA synthesis and FA elongation.beta ketoacyl CoA synthase	very weakly similar to (98.6) AT1G04220 | Symbols: KCS2 | KCS2 (3-KETOACYL-COA SYNTHASE 2); fatty acid elongase | chr1:1119853-1122483 REVERSEweakly similar to ( 112) loc_os11g37900 12011.m07636 protein fatty acid elongase, putative, expressed seq=cds; coord=4:9751997..9752755:1; parent_gene=GRMZM2G097469	3.51177e-07	2.50095e-06
GRMZM2G125356	GRMZM2G125356_T01	5.02123	0.0764288	2.20692		cell wall.pectin*esterases.PME	moderately similar to ( 438) AT5G49180 | Symbols: | pectinesterase family protein | chr5:19940783-19942876 REVERSEmoderately similar to ( 404) PME1_CITSI Pectinesterase-1 precursor (EC 3.1.1.11) (Pectin methylesterase) (PE) - Citrus sinensis (Sweet orange)highly similar to ( 942) loc_os04g38560 12004.m08845 protein pectinesterase-1 precursor, putative, expressed seq=cds; coord=10:122230413..12223…	2.51623e-08	2.14728e-07
GRMZM2G011357	GRMZM2G011357_T01	4.98332	3.1365	88.3955	27.2292	RNA.regulation of transcription.C2H2 zinc finger family	moderately similar to ( 275) AT1G55110 | Symbols: AtIDD7 | AtIDD7 (Arabidopsis thaliana Indeterminate(ID)-Domain 7); nucleic acid binding / transcription factor/ zinc ion binding | chr1:20560406-20562625 REVERSEmoderately similar to ( 302) loc_os10g28330 12010.m05713 protein zinc finger protein ID1, putative, expressed seq=cds; coord=1:239608944..239612267:-1; parent_gene=GRMZM2G011357	1.30832e-119	1.22565e-116
GRMZM2G303509	GRMZM2G303509_T01	4.95992	0.286333	7.92352		not assigned.unknown	seq=cds; coord=5:205386537..205387092:1; parent_gene=GRMZM2G303509	4.84437e-08	3.96548e-07
GRMZM2G320786	GRMZM2G320786_T01	4.95957	0.133279	3.68814		secondary metabolism.simple phenols	highly similar to ( 600) AT5G09360 | Symbols: LAC14 | LAC14 (laccase 14); laccase | chr5:2906426-2908658 REVERSEmoderately similar to ( 217) ASO_CUCSA L-ascorbate oxidase precursor (EC 1.10.3.3) (Ascorbase) (ASO) - Cucumis sativus (Cucumber)highly similar to ( 790) loc_os02g51440 12002.m10178 protein laccase, putative seq=cds; coord=5:207890406..207893256:-1; parent_gene=GRMZM2G320786	1.37513e-13	2.14179e-12
GRMZM5G868730	GRMZM5G868730_T01	4.95907	0.101273	2.80247	4.5109	signalling.in sugar and nutrient physiology	moderately similar to ( 271) AT5G64260 | Symbols: EXL2 | EXL2 (EXORDIUM LIKE 2) | chr5:25703980-25704897 FORWARDmoderately similar to ( 412) loc_os08g37840 12008.m07769 protein PHI-1, putative, expressed seq=cds; coord=4:196987297..196988868:-1; parent_gene=GRMZM5G868730	6.53759e-07	4.46683e-06
GRMZM2G025105	GRMZM2G025105_T01	4.94995	0.998574	27.4613	3.61026	stress.biotic	moderately similar to ( 254) AT5G06860 | Symbols: PGIP1, ATPGIP1 | PGIP1 (POLYGALACTURONASE INHIBITING PROTEIN 1); protein binding | chr5:2132373-2133434 FORWARDweakly similar to ( 191) PGIP1_PHAVU Polygalacturonase inhibitor 1 precursor (Polygalacturonase-inhibiting protein) (PGIP-1) - Phaseolus vulgaris (Kidney bean) (French bean)moderately similar to ( 348) loc_os05g01370 12005.m04676 protein …	4.84575e-41	4.48969e-39
GRMZM2G068220	GRMZM2G068220_T01	4.92751	0.470314	12.7318	2.53923	transport.misc	highly similar to ( 572) AT5G50300 | Symbols: | xanthine/uracil/vitamin C permease family protein | chr5:20466492-20468084 REVERSEhighly similar to ( 792) loc_os11g24060 12011.m06332 protein transmembrane transport protein-like, putative, expressed seq=cds; coord=2:218937924..218939954:1; parent_gene=GRMZM2G068220	2.32284e-36	1.71294e-34
GRMZM2G062718	GRMZM2G062718_T01	4.92656	0.179281	4.85327	6.26136	lipid metabolism.FA synthesis and FA elongation.beta ketoacyl CoA synthase	moderately similar to ( 453) AT1G68530 | Symbols: CUT1, POP1, CER6, G2, KCS6 | KCS6 (3-KETOACYL-COA SYNTHASE 6); catalytic/ transferase, transferring acyl groups other than amino-acyl groups | chr1:25713600-25714733 REVERSEhighly similar to ( 660) loc_os01g34560 12001.m09761 protein 3-ketoacyl-CoA synthase, putative, expressed seq=cds; coord=3:228373735..228375510:-1; parent_gene=GRMZM2G062718	2.52057e-13	3.85461e-12
GRMZM2G412207	GRMZM2G412207_T04	4.89606	0.0693687	1.83614		cell wall.degradation.pectate lyases and polygalacturonases	highly similar to ( 635) AT4G13710 | Symbols: | pectate lyase family protein | chr4:7962550-7966012 FORWARDmoderately similar to ( 434) PEL_LILLO Pectate lyase precursor (EC 4.2.2.2) - Lilium longiflorum (Trumpet lily)highly similar to ( 716) loc_os04g05050 12004.m35243 protein pectate lyase 8 precursor, putative, expressed seq=cds; coord=10:101889767..101897989:-1; parent_gene=GRMZM2G412207	1.21719e-06	7.90032e-06
GRMZM2G007236	GRMZM2G007236_T01	4.89557	0.447613	11.848	4.07814	misc.GDSL-motif lipase	weakly similar to ( 137) AT1G28640 | Symbols: | GDSL-motif lipase, putative | chr1:10067563-10069109 REVERSEweakly similar to ( 172) loc_os01g11740 12001.m07791 protein esterase precursor, putative, expressed seq=cds; coord=8:25130829..25132051:-1; parent_gene=GRMZM2G007236	2.73266e-18	6.54545e-17
GRMZM2G174860	GRMZM2G174860_T01	4.89527	0.199126	5.27071		lipid metabolism.lipid degradation.lipases.triacylglycerol lipase	moderately similar to ( 375) AT4G16820 | Symbols: | lipase class 3 family protein | chr4:9467563-9469116 FORWARDhighly similar to ( 635) loc_os08g04800 12008.m04623 protein triacylglycerol lipase like protein, putative, expressed seq=cds; coord=4:34996783..34998381:-1; parent_gene=GRMZM2G174860	4.62418e-13	6.85604e-12
GRMZM2G141376	GRMZM2G141376_T01	4.8772	1.19278	31.1499	1.70467	redox.ascorbate and glutathione.ascorbate	highly similar to ( 689) AT5G21105 | Symbols: | L-ascorbate oxidase/ copper ion binding / oxidoreductase | chr5:7174321-7177409 FORWARDhighly similar to ( 729) ASO_CUCSA L-ascorbate oxidase precursor (EC 1.10.3.3) (Ascorbase) (ASO) - Cucumis sativus (Cucumber)highly similar to ( 915) loc_os06g37080 12006.m08243 protein L-ascorbate oxidase precursor, putative, expressed seq=cds; coord=9:77544305..…	3.88101e-76	1.34474e-73
GRMZM2G300965	GRMZM2G300965_T01	4.86007	1.45247	37.5096	6.30155	stress.biotic.respiratory burst	highly similar to ( 949) AT1G09090 | Symbols: ATRBOHB | ATRBOHB (respiratory burst oxidase homolog B); FAD binding / calcium ion binding / electron carrier/ iron ion binding / oxidoreductase/ oxidoreductase, acting on NADH or NADPH, with oxygen as acceptor / peroxidase | chr1:2932743-2935590 FORWARDnearly identical (1311) loc_os12g35610 12012.m26926 protein respiratory burst oxidase, putative, ex…	1.20751e-102	8.03758e-100
GRMZM2G459864	GRMZM2G459864_T01	4.82906	0.624318	15.7741		RNA.regulation of transcription.MADS box transcription factor family	weakly similar to ( 107) AT5G60440 | Symbols: AGL62 | AGL62 (Agamous-like 62); DNA binding / transcription factor | chr5:24306329-24307520 FORWARDweakly similar to ( 139) loc_os05g23780 12005.m06672 protein DNA binding protein, putative seq=cds; coord=10:69130821..69131585:-1; parent_gene=GRMZM2G459864	1.63965e-18	4.00321e-17
GRMZM2G152793	GRMZM2G152793_T01	4.82726	0.113878	2.87725		signalling.receptor kinases.DUF 26	moderately similar to ( 416) AT5G35370 | Symbols: | ATP binding / carbohydrate binding / kinase/ protein kinase/ protein serine/threonine kinase/ protein tyrosine kinase/ sugar binding | chr5:13588564-13591182 REVERSEmoderately similar to ( 214) KPRO_MAIZE Putative receptor protein kinase ZmPK1 precursor (EC 2.7.11.1) - Zea mays (Maize)nearly identical (1078) loc_os02g52850 12002.m10315 protein A…	1.56042e-12	2.17822e-11
GRMZM2G056469	GRMZM2G056469_T01	4.78215	0.281772	6.89327		secondary metabolism.N misc.alkaloid-like	moderately similar to ( 491) AT2G20340 | Symbols: | tyrosine decarboxylase, putative | chr2:8779804-8782490 FORWARDhighly similar to ( 509) TYDC2_PETCR Tyrosine decarboxylase 2 (EC 4.1.1.25) - Petroselinum crispum (Parsley) (Petroselinum hortense)highly similar to ( 801) loc_os01g56380 12001.m11794 protein tyrosine/DOPA decarboxylase 2, putative, expressed seq=cds; coord=1:17829269..17830963:-1; …	8.58657e-17	1.8024e-15
GRMZM2G150091	GRMZM2G150091_T01	4.74769	6.89811	164.897	4.96166	redox.thioredoxin	weakly similar to ( 118) AT1G19730 | Symbols: ATTRX4, ATH4 | ATTRX4; oxidoreductase, acting on sulfur group of donors, disulfide as acceptor | chr1:6823163-6824020 REVERSEweakly similar to ( 137) TRXH_ORYSA Thioredoxin H-type (TRX-H) (Phloem sap 13 kDa protein 1) - Oryza sativa (Rice)weakly similar to ( 137) loc_os07g08840 12007.m079626 protein thioredoxin H-type, putative, expressed seq=cds; coo…	5.37541e-114	4.53219e-111
GRMZM2G177812	GRMZM2G177812_T01	4.72124	0.118453	2.77908	1.85864	transport.ABC transporters and multidrug resistance systems	highly similar to ( 992) AT1G17840 | Symbols: WBC11, ABCG11, DSO, COF1, ATWBC11 | WBC11 (WHITE-BROWN COMPLEX HOMOLOG PROTEIN 11); ATPase, coupled to transmembrane movement of substances / fatty acid transporter | chr1:6142870-6145894 FORWARDweakly similar to ( 164) PDR4_ORYSA Pleiotropic drug resistance protein 4 - Oryza sativa (Rice)nearly identical (1204) loc_os04g44610 12004.m09420 protein ABC…	1.79493e-11	2.25763e-10
GRMZM2G131099	GRMZM2G131099_T01	4.67413	1.41422	32.0858	5.52205	not assigned.unknown	weakly similar to ( 119) loc_os01g51670 12001.m11345 protein expressed protein seq=cds; coord=3:203169070..203169857:-1; parent_gene=GRMZM2G131099	2.2265e-34	1.47427e-32
GRMZM2G064437	GRMZM2G064437_T01	4.66869	1.79668	40.6957	26.0168	transport.sugars	highly similar to ( 578) AT3G18830 | Symbols: ATPLT5 | ATPLT5 (POLYOL TRANSPORTER 5); D-ribose transmembrane transporter/ D-xylose transmembrane transporter/ carbohydrate transmembrane transporter/ galactose transmembrane transporter/ glucose transmembrane transporter/ glycerol transmembrane transporter/ mann | chr3:6489000-6491209 REVERSEweakly similar to ( 184) STC_RICCO Sugar carrier protein C…	3.43639e-81	1.40194e-78
GRMZM2G135385	GRMZM2G135385_T01	4.6552	17.3094	388.018	2.76673	redox.ascorbate and glutathione	weakly similar to ( 131) AT5G53560 | Symbols: ATB5-A, B5 #2, ATCB5-E, CB5-E | CB5-E (CYTOCHROME B5 ISOFORM E); heme binding | chr5:21759628-21760353 FORWARDweakly similar to ( 122) CYB5_ORYSA Cytochrome b5 - Oryza sativa (Rice)weakly similar to ( 174) loc_os02g43360 12002.m09371 protein cytochrome b5, putative, expressed seq=cds; coord=5:190563132..190564028:-1; parent_gene=GRMZM2G135385	4.51865e-150	7.61966e-147
GRMZM2G160710	GRMZM2G160710_T01	4.63372	10.4612	230.904		not assigned.unknown	weakly similar to ( 107) loc_os02g37290 12002.m08817 protein metal ion binding protein, putative, expressed seq=cds; coord=5:178737671..178738620:-1; parent_gene=GRMZM2G160710	2.67354e-129	2.9402e-126
GRMZM2G368827	GRMZM2G368827_T01	4.56971	5.46912	115.572	1.00663	development.unspecified	weakly similar to ( 158) AT5G50790 | Symbols: | nodulin MtN3 family protein | chr5:20656461-20657827 REVERSEmoderately similar to ( 352) loc_os08g42350 12008.m08213 protein MTN3, putative, expressed seq=cds; coord=1:194932443..194935353:-1; parent_gene=GRMZM2G368827	1.62879e-124	1.71661e-121
GRMZM5G896560	GRMZM5G896560_T01	4.52448	1.26781	25.9312	15.4011	not assigned.unknown	seq=cds; coord=7:39873483..39874398:1; parent_gene=GRMZM5G896560	6.91966e-30	3.5866e-28
GRMZM2G136364	GRMZM2G136364_T02	4.52324	0.311244	6.36603	1.41785	misc.protease inhibitor/seed storage/lipid transfer protein (LTP) family protein	weakly similar to ( 132) AT5G05960 | Symbols: | protease inhibitor/seed storage/lipid transfer protein (LTP) family protein | chr5:1790256-1790694 FORWARDweakly similar to ( 174) loc_os04g33920 12004.m08486 protein lipid binding protein, putative, expressed seq=cds; coord=2:55687675..55688855:-1; parent_gene=GRMZM2G136364	3.87032e-10	4.15694e-09
GRMZM2G138338	GRMZM2G138338_T01	4.50426	0.645585	13.0491	25.0958	signalling.receptor kinases.leucine rich repeat XI	highly similar to ( 611) AT3G28040 | Symbols: | leucine-rich repeat transmembrane protein kinase, putative | chr3:10435139-10438268 FORWARDmoderately similar to ( 258) RPK1_IPONI Receptor-like protein kinase precursor (EC 2.7.11.1) - Ipomoea nil (Japanese morning glory) (Pharbitis nil)nearly identical (1328) loc_os01g72700 12001.m13304 protein ATP binding protein, putative, expressed seq=cds; coo…	4.17691e-54	6.1784e-52
GRMZM2G127990	GRMZM2G127990_T01	4.48021	0.100697	1.99902		signalling.receptor kinases.leucine rich repeat XI	highly similar to ( 877) AT2G24130 | Symbols: | leucine-rich repeat transmembrane protein kinase, putative | chr2:10258148-10261220 FORWARDmoderately similar to ( 398) PSKR_DAUCA Phytosulfokine receptor precursor (EC 2.7.11.1) (Phytosulfokine LRR receptor kinase) - Daucus carota (Carrot)nearly identical (1397) loc_os06g08690 12006.m05588 protein leucine-rich repeat receptor protein kinase EXS pre…	7.1685e-10	7.44641e-09
GRMZM2G428379	GRMZM2G428379_T01	4.4801	1.16282	23.0843		signalling.in sugar and nutrient physiology	highly similar to ( 603) AT2G29110 | Symbols: ATGLR2.8, GLR2.8 | ATGLR2.8; intracellular ligand-gated ion channel | chr2:12506880-12510552 REVERSEmoderately similar to ( 387) GLR31_ORYSA Glutamate receptor 3.1 precursor (Ligand-gated ion channel 3.1) - Oryza sativa (Rice)nearly identical (1076) loc_os02g54640 12002.m10493 protein glutamate receptor 2.9 precursor, putative, expressed seq=cds; coor…	7.73599e-70	2.10402e-67
GRMZM2G130389	GRMZM2G130389_T01	4.48008	0.601895	11.9488	1.42172	signalling.receptor kinases.DUF 26	moderately similar to ( 211) AT1G11350 | Symbols: CBRLK1, SD1-13, RKS2 | SD1-13 (S-DOMAIN-1 13); kinase/ protein kinase/ protein serine/threonine kinase | chr1:3817725-3820752 REVERSEweakly similar to ( 158) PSKR_DAUCA Phytosulfokine receptor precursor (EC 2.7.11.1) (Phytosulfokine LRR receptor kinase) - Daucus carota (Carrot)moderately similar to ( 308) loc_os11g11780 12011.m05370 protein serine…	5.05543e-26	2.01373e-24
GRMZM2G154332	GRMZM2G154332_T01	4.4799	0.400506	7.95082		hormone metabolism.auxin.induced-regulated-responsive-activated	weakly similar to ( 113) loc_os02g52990 12002.m10329 protein OsSAUR12 - Auxin-responsive SAUR gene family member, expressed seq=cds; coord=5:210475561..210476355:-1; parent_gene=GRMZM2G154332	7.1685e-10	7.44641e-09
GRMZM2G074248	GRMZM2G074248_T01	4.47939	8.05674	159.36		not assigned.unknown	weakly similar to ( 123) loc_os01g64470 12001.m12561 protein YLS9, putative, expressed seq=cds; coord=3:176301626..176302613:1; parent_gene=GRMZM2G074248	4.52831e-114	3.94963e-111
GRMZM2G158328	GRMZM2G158328_T01	4.47043	4.10777	81.1253	27.0801	RNA.regulation of transcription.WRKY domain transcription factor family	weakly similar to ( 166) loc_os01g60600 12001.m12188 protein WRKY DNA binding domain containing protein, expressed seq=cds; coord=3:184849632..184852523:1; parent_gene=GRMZM2G158328	1.1292e-101	7.32362e-99
GRMZM2G045215	GRMZM2G045215_T01	4.46878	1.12909	22.2293	1.14299	misc.GDSL-motif lipase	moderately similar to ( 472) AT5G45670 | Symbols: | GDSL-motif lipase/hydrolase family protein | chr5:18528600-18530164 FORWARDweakly similar to ( 165) APG_BRANA Anter-specific proline-rich protein APG (Protein CEX) (Fragment) - Brassica napus (Rape)highly similar to ( 573) loc_os05g44200 12005.m08546 protein anther-specific proline-rich protein APG, putative, expressed seq=cds; coord=3:197506716…	3.64423e-42	3.54528e-40
GRMZM2G175927	GRMZM2G175927_T01	4.44865	0.697814	13.5531		RNA.regulation of transcription.unclassified	moderately similar to ( 243) AT2G03200 | Symbols: | aspartyl protease family protein | chr2:966506-967891 REVERSEmoderately similar to ( 464) loc_os07g34940 12007.m07750 protein aspartic proteinase nepenthesin-1 precursor, putative, expressed seq=cds; coord=2:203944178..203945774:-1; parent_gene=GRMZM2G175927	1.507e-28	7.33041e-27
GRMZM2G125923	GRMZM2G125923_T01	4.41843	2.82336	53.6933	11.5247	amino acid metabolism.synthesis.aromatic aa.phenylalanine.arogenate dehydratase / prephenate dehydratase	highly similar to ( 557) AT1G08250 | Symbols: ADT6 | ADT6 (arogenate dehydratase 6); arogenate dehydratase/ prephenate dehydratase | chr1:2588994-2590235 REVERSEhighly similar to ( 687) loc_os04g33390 12004.m08428 protein P-protein, putative, expressed seq=cds; coord=10:113515151..113516898:1; parent_gene=GRMZM2G125923	2.98082e-84	1.29995e-81
GRMZM2G006894	GRMZM2G006894_T02	4.41142	1.35431	25.6776	3.02563	transport.p- and v-ATPases	nearly identical (1538) AT4G30190 | Symbols: AHA2, PMA2 | AHA2; ATPase/ hydrogen-exporting ATPase, phosphorylative mechanism | chr4:14770820-14775920 REVERSEnearly identical (1693) PMA1_ORYSA Plasma membrane ATPase (EC 3.6.3.6) (Proton pump) - Oryza sativa (Rice)nearly identical (1693) loc_os04g56160 12004.m101441 protein plasma membrane ATPase, putative, expressed seq=cds; coord=10:146179978..14…	4.41894e-80	1.74645e-77
GRMZM2G004519	GRMZM2G004519_T01	4.4055	0.515771	9.72192		protein.degradation.ubiquitin.E3.RING	very weakly similar to (84.7) AT2G42350 | Symbols: | zinc finger (C3HC4-type RING finger) family protein | chr2:17639245-17639898 FORWARDvery weakly similar to (91.3) EL5_ORYSA E3 ubiquitin-protein ligase EL5 (EC 6.3.2.-) - Oryza sativa (Rice)weakly similar to ( 188) loc_os01g20910 12001.m08575 protein RING-H2 finger protein ATL2L, putative, expressed seq=cds; coord=8:35643997..35644922:1; parent…	7.50893e-14	1.20286e-12
GRMZM5G848185	GRMZM5G848185_T01	4.40537	0.879565	16.5792		RNA.regulation of transcription.MYB domain transcription factor family	weakly similar to ( 136) AT5G57620 | Symbols: MYB36, AtMYB36 | MYB36 (myb domain protein 36); DNA binding / transcription factor | chr5:23334904-23336388 FORWARDvery weakly similar to (82.8) MYB4_ORYSA Myb-related protein Myb4 (OsMyb4) (Transcription factor RLTR1) - Oryza sativa (Rice)moderately similar to ( 259) loc_os02g54520 12002.m10481 protein myb-like DNA-binding domain containing protein, …	1.2629e-24	4.62954e-23
GRMZM2G459663	GRMZM2G459663_T01	4.40042	0.564143	10.5885		signalling.calcium	weakly similar to ( 113) loc_os07g43800 12007.m08605 protein EF hand family protein, expressed seq=cds; coord=7:167817587..167818997:1; parent_gene=GRMZM2G459663	2.31529e-20	6.45677e-19
GRMZM2G075417	GRMZM2G075417_T01	4.39005	0.164975	3.07659		lipid metabolism.FA synthesis and FA elongation.acyl coa ligase	highly similar to ( 571) AT1G65890 | Symbols: AAE12 | AAE12 (ACYL ACTIVATING ENZYME 12); catalytic | chr1:24512598-24514611 REVERSEweakly similar to ( 134) 4CL1_PETCR 4-coumarate--CoA ligase 1 (EC 6.2.1.12) (4CL 1) (4-coumaroyl-CoA synthase 1) - Petroselinum crispum (Parsley) (Petroselinum hortense)highly similar to ( 800) loc_os03g03790 12003.m05911 protein acyl-activating enzyme 11, putative, e…	2.46402e-09	2.40451e-08
GRMZM2G111975	GRMZM2G111975_T01	4.31778	0.874732	15.4858		protein.glycosylation	moderately similar to ( 236) AT1G08280 | Symbols: | glycosyl transferase family 29 protein / sialyltransferase family protein | chr1:2608408-2609604 FORWARDmoderately similar to ( 419) loc_os04g42760 12004.m09241 protein sialyltransferase-like protein, putative, expressed seq=cds; coord=2:30398686..30399959:1; parent_gene=GRMZM2G111975	4.56792e-26	1.83108e-24
GRMZM5G852704	GRMZM5G852704_T01	4.31089	0.454861	8.02655	4.9116	RNA.regulation of transcription.AP2/EREBP, APETALA2/Ethylene-responsive element binding protein family	weakly similar to ( 135) AT1G22190 | Symbols: | AP2 domain-containing transcription factor, putative | chr1:7836245-7837030 FORWARDmoderately similar to ( 209) loc_os02g51670 12002.m10198 protein AP2 domain-containing protein, putative, expressed seq=cds; coord=9:5876876..5877925:-1; parent_gene=GRMZM5G852704	5.61628e-12	7.42982e-11
GRMZM5G849099	GRMZM5G849099_T01	4.30791	1.42568	25.1578	29.1856	not assigned.unknown	seq=cds; coord=3:207771102..207772106:-1; parent_gene=GRMZM5G849099	4.42012e-32	2.56428e-30
AC203408.4	AC203408.4_FGT003	4.27916	0.798001	13.7616		cell wall.degradation.cellulases and beta -1,4-glucanases	moderately similar to ( 380) AT2G44550 | Symbols: AtGH9B10 | AtGH9B10 (Arabidopsis thaliana glycosyl hydrolase 9B10); catalytic/ hydrolase, hydrolyzing O-glycosyl compounds | chr2:18389381-18391142 REVERSEmoderately similar to ( 492) GUN14_ORYSA Endoglucanase 14 precursor (EC 3.2.1.4) (Endo-1,4-beta glucanase 14) - Oryza sativa (Rice)moderately similar to ( 492) loc_os05g03840 12005.m04918 protei…	1.65935e-22	5.29945e-21
GRMZM2G064106	GRMZM2G064106_T01	4.27523	0.797202	13.7159		redox.ascorbate and glutathione.ascorbate	highly similar to ( 694) AT4G39830 | Symbols: | L-ascorbate oxidase, putative | chr4:18479103-18481184 FORWARDhighly similar to ( 581) ASO_CUCSA L-ascorbate oxidase precursor (EC 1.10.3.3) (Ascorbase) (ASO) - Cucumis sativus (Cucumber)highly similar to ( 907) loc_os09g20090 12009.m05216 protein L-ascorbate oxidase precursor, putative, expressed seq=cds; coord=7:99535861..99539292:-1; parent_gene=…	8.4356e-34	5.37456e-32
GRMZM2G150907	GRMZM2G150907_T01	4.2602	0.604999	10.2946		misc.cytochrome P450	moderately similar to ( 476) AT2G46950 | Symbols: CYP709B2 | CYP709B2; electron carrier/ heme binding / iron ion binding / monooxygenase/ oxygen binding | chr2:19289466-19291541 REVERSEmoderately similar to ( 345) C72A1_CATRO Cytochrome P450 72A1 (EC 1.3.3.9) (CYPLXXII) (Secologanin synthase) (SLS) - Catharanthus roseus (Rosy periwinkle) (Madagascar periwinkle)highly similar to ( 716) loc_os07g23…	6.30735e-25	2.36703e-23
GRMZM2G466309	GRMZM2G466309_T01	4.24436	0.458353	7.72053		not assigned.unknown	seq=cds; coord=5:202304835..202305876:1; parent_gene=GRMZM2G466309	1.82768e-11	2.29312e-10
AC206901.3	AC206901.3_FGT005	4.24413	0.381777	6.43069		RNA.regulation of transcription.MYB domain transcription factor family	moderately similar to ( 230) AT3G23250 | Symbols: MYB15, ATY19, ATMYB15 | MYB15 (MYB DOMAIN PROTEIN 15); DNA binding / transcription factor | chr3:8309742-8310624 FORWARDmoderately similar to ( 237) MYB4_ORYSA Myb-related protein Myb4 (OsMyb4) (Transcription factor RLTR1) - Oryza sativa (Rice)moderately similar to ( 237) loc_os04g43680 12004.m09327 protein myb-related protein Myb4, putative, expr…	2.93147e-08	2.47409e-07
GRMZM2G009103	GRMZM2G009103_T01	4.24383	0.212552	3.58023	2.90479	development.unspecified	moderately similar to ( 278) AT5G64700 | Symbols: | nodulin MtN21 family protein | chr5:25865190-25866845 REVERSEmoderately similar to ( 489) loc_os07g34070 12007.m07665 protein nodulin-like protein, putative, expressed seq=cds; coord=7:153854652..153857016:-1; parent_gene=GRMZM2G009103	2.93147e-08	2.47409e-07
GRMZM2G003551	GRMZM2G003551_T01	4.24289	0.657313	11.0718		RNA.regulation of transcription.WRKY domain transcription factor family	weakly similar to ( 130) AT4G23810 | Symbols: WRKY53, ATWRKY53 | WRKY53; DNA binding / protein binding / transcription activator/ transcription factor | chr4:12392666-12393739 REVERSEmoderately similar to ( 243) loc_os06g06360 12006.m05362 protein WRKY transcription factor 30, putative, expressed seq=cds; coord=9:18101309..18104762:1; parent_gene=GRMZM2G003551	3.42269e-18	8.12135e-17
GRMZM2G050450	GRMZM2G050450_T01	4.24229	0.54521	9.18355		stress.biotic	moderately similar to ( 342) AT5G17540 | Symbols: | transferase family protein | chr5:5782061-5783682 REVERSEweakly similar to ( 141) HCBT1_DIACA Anthranilate N-benzoyltransferase protein 1 (EC 2.3.1.144) (Anthranilate N-hydroxycinnamoyl/benzoyltransferase 1) - Dianthus caryophyllus (Carnation) (Clove pink)highly similar to ( 764) loc_os06g49660 12006.m09490 protein taxadien-5-alpha-ol O-acetyltr…	4.94655e-22	1.52583e-20
GRMZM2G023921	GRMZM2G023921_T01	4.22734	1.26781	21.1372	1.83347	not assigned.unknown	seq=cds; coord=2:5836317..5837195:1; parent_gene=GRMZM2G023921	3.07271e-24	1.09621e-22
AC155610.2	AC155610.2_FGT007	4.22077	5.04866	83.8252	36.7981	not assigned.unknown	highly similar to ( 520) AT5G41040 | Symbols: | transferase family protein | chr5:16431582-16433086 FORWARDweakly similar to ( 189) HCBT2_DIACA Anthranilate N-benzoyltransferase protein 2 (EC 2.3.1.144) (Anthranilate N-hydroxycinnamoyl/benzoyltransferase 2) - Dianthus caryophyllus (Carnation) (Clove pink)highly similar to ( 700) loc_os11g31090 12011.m07014 protein transferase, putative, expressed…	8.37518e-93	4.41337e-90
GRMZM2G143352	GRMZM2G143352_T01	4.21748	0.785209	12.9899		RNA.regulation of transcription.Aux/IAA family	very weakly similar to (94.7) AT5G57420 | Symbols: IAA33 | IAA33 (INDOLE-3-ACETIC ACID INDUCIBLE 33); transcription factor | chr5:23270024-23270959 FORWARDvery weakly similar to (92.8) loc_os04g55950 12004.m10486 protein expressed protein seq=cds; coord=10:145949349..145950277:1; parent_gene=GRMZM2G143352	4.94581e-14	8.08134e-13
GRMZM2G001812	GRMZM2G001812_T01	4.19714	0.362462	5.91151	1.3454	signalling.receptor kinases.leucine rich repeat XI	highly similar to ( 716) AT1G35710 | Symbols: | leucine-rich repeat transmembrane protein kinase, putative | chr1:13220940-13224386 FORWARDmoderately similar to ( 476) RPK1_IPONI Receptor-like protein kinase precursor (EC 2.7.11.1) - Ipomoea nil (Japanese morning glory) (Pharbitis nil)nearly identical (1556) loc_os10g33040 12010.m06140 protein receptor-like protein kinase precursor, putative, exp…	1.07238e-29	5.51314e-28
GRMZM2G475185	GRMZM2G475185_T01	4.1955	6.34498	103.405	8.75881	not assigned.unknown	seq=cds; coord=2:185943612..185943887:-1; parent_gene=GRMZM2G475185	4.22105e-33	2.58516e-31
GRMZM2G369445	GRMZM2G369445_T01	4.1901	0.827019	13.4329	2.30231	not assigned.unknown	seq=cds; coord=2:222647756..222648525:1; parent_gene=GRMZM2G369445	8.73119e-14	1.38897e-12
GRMZM2G118507	GRMZM2G118507_T01	4.17222	0.233091	3.73924	5.9777	not assigned.unknown	moderately similar to ( 319) AT4G00910 | Symbols: | unknown protein | chr4:389370-391287 REVERSEhighly similar to ( 724) loc_os06g22600 12006.m06914 protein ALMT1, putative, expressed seq=cds; coord=9:54156833..54159129:-1; parent_gene=GRMZM2G118507	1.07653e-10	1.23772e-09
GRMZM2G118345	GRMZM2G118345_T01	4.16718	1.62782	26.0482	1.26337	secondary metabolism.phenylpropanoids.lignin biosynthesis.PAL	nearly identical (1049) AT2G37040 | Symbols: pal1, ATPAL1 | pal1 (Phe ammonia lyase 1); phenylalanine ammonia-lyase | chr2:15557602-15560237 REVERSEnearly identical (1203) PALY_WHEAT Phenylalanine ammonia-lyase (EC 4.3.1.5) - Triticum aestivum (Wheat)nearly identical (1265) loc_os04g43800 12004.m09339 protein phenylalanine ammonia-lyase, putative, expressed seq=cds; coord=2:28048958..28052061:1; …	2.41581e-70	6.7149e-68
GRMZM2G137786	GRMZM2G137786_T01	4.13566	0.144794	2.26471		secondary metabolism.isoprenoids.terpenoids	highly similar to ( 774) AT2G07050 | Symbols: CAS1 | CAS1 (cycloartenol synthase 1); cycloartenol synthase | chr2:2924629-2930295 FORWARDhighly similar to ( 936) loc_os11g18194 12011.m05894 protein cycloartenol synthase, putative, expressed seq=cds; coord=1:159952147..160015647:-1; parent_gene=GRMZM2G137786	1.01396e-07	7.8866e-07
GRMZM2G413337	GRMZM2G413337_T01	4.13025	36.5246	570.095	38.7983	not assigned.unknown	seq=cds; coord=9:154777160..154778131:1; parent_gene=GRMZM2G413337	8.44698e-165	1.78048e-161
GRMZM2G329002	GRMZM2G329002_T01	4.11917	3.23928	50.0922		cell wall.pectin*esterases.acetyl esterase	moderately similar to ( 370) AT3G09410 | Symbols: | pectinacetylesterase family protein | chr3:2898243-2900984 REVERSEhighly similar to ( 501) loc_os01g66850 12001.m43520 protein carboxylic ester hydrolase, putative, expressed seq=cds; coord=3:169043946..169046955:1; parent_gene=GRMZM2G329002	1.0118e-73	3.19905e-71
GRMZM2G119864	GRMZM2G119864_T01	4.11126	5.26973	81.0886		cell wall.pectin*esterases.PME	moderately similar to ( 455) AT4G02330 | Symbols: ATPMEPCRB | ATPMEPCRB; pectinesterase | chr4:1032479-1034928 FORWARDmoderately similar to ( 267) PME1_CITSI Pectinesterase-1 precursor (EC 3.1.1.11) (Pectin methylesterase) (PE) - Citrus sinensis (Sweet orange)highly similar to ( 706) loc_os01g20980 12001.m08582 protein pectinesterase-1 precursor, putative, expressed seq=cds; coord=3:56013707..560…	1.84065e-98	1.13555e-95
GRMZM5G898274	GRMZM5G898274_T01	4.10882	1.21993	18.7139		not assigned.unknown	seq=cds; coord=6:137397456..137397977:1; parent_gene=GRMZM5G898274	5.11881e-14	8.34786e-13
AC209206.3	AC209206.3_FGT014	4.10743	13.291	204.149		not assigned.unknown	highly similar to ( 522) PPO_MALDO Polyphenol oxidase, chloroplast precursor (EC 1.10.3.1) (PPO) (Catechol oxidase) - Malus domestica (Apple) (Malus sylvestris)highly similar to ( 667) loc_os04g53300 12004.m10221 protein polyphenol oxidase II, chloroplast precursor, putative, expressed seq=cds; coord=10:137458157..137460537:-1; parent_gene=AC209206.3_FG014	8.93724e-142	1.18978e-138
GRMZM2G363116	GRMZM2G363116_T01	4.09789	1.2885	19.6366	12.7538	cell.cell death.plants	weakly similar to ( 162) AT5G06570 | Symbols: | hydrolase | chr5:2008075-2011013 REVERSEvery weakly similar to (91.7) GID1_ORYSA Gibberellin receptor GID1 (EC 3.-.-.-) (Gibberellin-insensitive dwarf protein 1) (Protein GIBBERELLIN INSENSITIVE DWARF1) - Oryza sativa (Rice)moderately similar to ( 436) loc_os05g33940 12005.m07626 protein hsr203J, putative, expressed seq=cds; coord=6:146563366..14656…	1.01697e-27	4.65158e-26
GRMZM2G131421	GRMZM2G131421_T01	4.07915	0.964856	14.5108	3.58138	development.unspecified	very weakly similar to (97.4) NO93_SOYBN Early nodulin 93 (N-93) - Glycine max (Soybean)weakly similar to ( 179) loc_os06g05010 12006.m31974 protein early nodulin 93, putative, expressed seq=cds; coord=9:20693835..20695096:1; parent_gene=GRMZM2G131421	1.21657e-19	3.20542e-18
GRMZM2G151249	GRMZM2G151249_T01	4.06296	8.1765	121.33		stress.abiotic.unspecified	moderately similar to ( 202) AT1G18970 | Symbols: GLP4 | GLP4 (GERMIN-LIKE PROTEIN 4); manganese ion binding / nutrient reservoir | chr1:6554702-6555364 REVERSEweakly similar to ( 190) OXO2_HORVU Oxalate oxidase 2 precursor (EC 1.2.3.4) (Germin) - Hordeum vulgare (Barley)moderately similar to ( 296) loc_os03g58980 12003.m10800 protein germin-like protein subfamily T member 2 precursor, putative, …	1.24778e-89	6.1885e-87
GRMZM2G468056	GRMZM2G468056_T01	4.02997	2.85071	41.4217	3.99575	RNA.regulation of transcription.WRKY domain transcription factor family	very weakly similar to (91.3) loc_os01g60640 12001.m12192 protein OsWRKY21 - Superfamily of rice TFs having WRKY and zinc finger domains, expressed seq=cds; coord=8:170335807..170336865:-1; parent_gene=GRMZM2G468056	6.30009e-35	4.30688e-33
GRMZM2G300080	GRMZM2G300080_T01	4.02262	2.28792	33.0325		not assigned.unknown	weakly similar to ( 124) loc_os12g02030 12012.m04205 protein TD and POZ domain-containing protein 2, putative, expressed seq=cds; coord=6:100436128..100439825:1; parent_gene=GRMZM2G300080	5.12727e-33	3.11005e-31
AC205703.4	AC205703.4_FGT001	4.02161	0.639362	9.23097	17.799	not assigned.unknown	weakly similar to ( 145) AT5G14360 | Symbols: | ubiquitin family protein | chr5:4631038-4631641 FORWARDmoderately similar to ( 218) loc_os02g38410 12002.m08929 protein BCL-2 binding anthanogene-1, putative, expressed seq=cds; coord=5:181014743..181016466:1; parent_gene=AC205703.4_FG001	3.51177e-07	2.50095e-06
GRMZM2G133413	GRMZM2G133413_T01	4.02161	0.152638	2.20375		cell.cycle	weakly similar to ( 171) AT5G10440 | Symbols: CYCD4;2 | CYCD4;2 (cyclin d4;2); cyclin-dependent protein kinase | chr5:3280611-3282342 REVERSEmoderately similar to ( 294) loc_os08g37390 12008.m07725 protein cyclin delta-2, putative, expressed seq=cds; coord=1:200723661..200726916:1; parent_gene=GRMZM2G133413	3.51177e-07	2.50095e-06
GRMZM2G083150	GRMZM2G083150_T01	4.02097	0.791062	11.4212	2.40242	not assigned.unknown	weakly similar to ( 145) loc_os05g01210 12005.m28020 protein expressed protein seq=cds; coord=3:32110511..32111641:-1; parent_gene=GRMZM2G083150	2.96712e-13	4.50212e-12
GRMZM2G079491	GRMZM2G079491_T02	4.02059	0.191578	2.76596	8.08073	not assigned.unknown	very weakly similar to ( 100) AT5G45480 | Symbols: | unknown protein | chr5:18426296-18428929 REVERSEmoderately similar to ( 437) loc_os07g16930 12007.m06134 protein expressed protein seq=cds; coord=4:201121907..201124490:1; parent_gene=GRMZM2G079491	1.15077e-09	1.16792e-08
GRMZM2G019413	GRMZM2G019413_T01	4.02016	0.462346	6.67525	6.16254	development.unspecified	moderately similar to ( 293) AT2G30300 | Symbols: | nodulin-related | chr2:12919401-12921222 FORWARDhighly similar to ( 666) loc_os01g61010 12001.m42745 protein nodulin-like protein, putative, expressed seq=cds; coord=8:170160297..170162518:1; parent_gene=GRMZM2G019413	1.12229e-18	2.76408e-17
GRMZM2G092474	GRMZM2G092474_T01	4.01219	7.44719	107.183	2.13365	stress.biotic	moderately similar to ( 233) AT4G11650 | Symbols: ATOSM34 | ATOSM34 (osmotin 34) | chr4:7025127-7026113 REVERSEmoderately similar to ( 255) ZEAM_MAIZE Zeamatin precursor - Zea mays (Maize)moderately similar to ( 306) loc_os12g43490 12012.m08122 protein alpha-amylase/trypsin inhibitor, putative, expressed seq=cds; coord=3:186793464..186794596:-1; parent_gene=GRMZM2G092474	3.06157e-89	1.48922e-86
GRMZM2G160990	GRMZM2G160990_T01	3.9993	0.425672	6.06039	9.55194	RNA.regulation of transcription.Trihelix, Triple-Helix transcription factor family	very weakly similar to (96.3) AT4G28300 | Symbols: | hydroxyproline-rich glycoprotein family protein | chr4:14015414-14016823 FORWARDmoderately similar to ( 479) loc_os01g48220 12001.m11014 protein expressed protein seq=cds; coord=8:149981862..149984439:-1; parent_gene=GRMZM2G160990	1.84893e-17	4.10595e-16
GRMZM2G135277	GRMZM2G135277_T01	3.99579	0.487749	6.92464	4.74006	misc.short chain dehydrogenase/reductase (SDR)	moderately similar to ( 246) AT3G59710 | Symbols: | short-chain dehydrogenase/reductase (SDR) family protein | chr3:22055220-22057156 REVERSEmoderately similar to ( 380) loc_os02g39490 12002.m09037 protein carbonyl reductase 3, putative, expressed seq=cds; coord=2:33004446..33008192:1; parent_gene=GRMZM2G135277	2.9058e-15	5.33377e-14
GRMZM2G039477	GRMZM2G039477_T01	3.9895	0.972221	13.7443	2.46049	not assigned.unknown	seq=cds; coord=2:4163994..4167200:1; parent_gene=GRMZM2G039477	9.60385e-13	1.3732e-11
GRMZM2G079638	GRMZM2G079638_T01	3.96938	0.875419	12.1877	18.4836	not assigned.unknown	seq=cds; coord=8:34389792..34391064:1; parent_gene=GRMZM2G079638	2.71555e-20	7.5068e-19
GRMZM2G359904	GRMZM2G359904_T01	3.94886	0.38877	5.33232		lipid metabolism.lipid degradation.lipases.triacylglycerol lipase	moderately similar to ( 472) AT1G06800 | Symbols: | lipase class 3 family protein | chr1:2090109-2091443 REVERSEweakly similar to ( 101) POLB_MAIZE Putative Pol polyprotein from transposon element Bs1 (ORF 1) - Zea mays (Maize)moderately similar to ( 457) loc_os05g32380 12005.m07471 protein triacylglycerol lipase, putative, expressed seq=cds; coord=6:77144115..77148553:-1; parent_gene=GRMZM2G3599…	9.66357e-27	4.05357e-25
GRMZM2G447795	GRMZM2G447795_T01	3.94768	3.26768	44.8191		stress.biotic	weakly similar to ( 189) AT5G24090 | Symbols: | acidic endochitinase (CHIB1) | chr5:8143805-8145153 REVERSEmoderately similar to ( 330) XIP1_ORYSA Xylanase inhibitor protein 1 precursor (Class III chitinase homolog a) (RIXI protein) - Oryza sativa (Rice)moderately similar to ( 330) loc_os11g47580 12011.m08558 protein xylanase inhibitor protein 1 precursor, putative, expressed seq=cds; coord=6:129…	2.58954e-53	3.74285e-51
GRMZM2G516301	GRMZM2G516301_T01	3.93736	1.38436	18.8767	3.97066	RNA.regulation of transcription.WRKY domain transcription factor family	weakly similar to ( 126) AT5G26170 | Symbols: WRKY50, ATWRKY50 | WRKY50; transcription factor | chr5:9147176-9148128 REVERSEweakly similar to ( 149) loc_os01g09100 12001.m07534 protein OsWRKY10 - Superfamily of rice TFs having WRKY and zinc finger domains, expressed seq=cds; coord=8:19834281..19835285:1; parent_gene=GRMZM2G516301	9.5643e-17	1.99768e-15
GRMZM2G010702	GRMZM2G010702_T01	3.93532	5.25283	71.4638		not assigned.unknown	seq=cds; coord=7:161958265..161959052:-1; parent_gene=GRMZM2G010702	6.40306e-55	9.81569e-53
GRMZM2G032807	GRMZM2G032807_T01	3.92705	0.631125	8.54253	1.43752	not assigned.unknown	weakly similar to ( 112) loc_os09g09930 12009.m04258 protein heavy metal-associated domain containing protein, expressed seq=cds; coord=7:75137287..75138492:1; parent_gene=GRMZM2G032807	3.11564e-12	4.22558e-11
GRMZM2G428179	GRMZM2G428179_T01	3.92162	0.643497	8.67129		protein.degradation.ubiquitin.E3.RING	very weakly similar to (80.5) AT2G42360 | Symbols: | zinc finger (C3HC4-type RING finger) family protein | chr2:17640907-17641617 FORWARDweakly similar to ( 194) loc_os01g55110 12001.m11671 protein RING-H2 finger protein ATL2K, putative, expressed seq=cds; coord=8:173934440..173935676:-1; parent_gene=GRMZM2G428179	1.58922e-14	2.72528e-13
GRMZM2G101409	GRMZM2G101409_T01	3.90479	2.29538	30.5758	1.3278	not assigned.unknown	seq=cds; coord=2:217684825..217685795:-1; parent_gene=GRMZM2G101409	1.30925e-33	8.23788e-32
AC149829.2	AC149829.2_FGT002	3.89692	9.36478	123.939	5.68807	not assigned.unknown	seq=cds; coord=9:151116517..151116771:-1; parent_gene=AC149829.2_FG002	4.17022e-35	2.87416e-33
GRMZM2G133055	GRMZM2G133055_T03	3.89566	0.409258	5.41637	1.24289	not assigned.unknown	seq=cds; coord=4:9800152..9801165:1; parent_gene=GRMZM2G133055	1.21719e-06	7.90032e-06
GRMZM2G050384	GRMZM2G050384_T01	3.86274	0.84345	10.909	1.28076	not assigned.unknown	seq=cds; coord=8:3928573..3929327:-1; parent_gene=GRMZM2G050384	8.23339e-11	9.57936e-10
GRMZM2G131165	GRMZM2G131165_T01	3.85108	0.274012	3.51656		secondary metabolism.phenylpropanoids.lignin biosynthesis.HCT	moderately similar to ( 297) AT5G48930 | Symbols: HCT | HCT (HYDROXYCINNAMOYL-COA SHIKIMATE/QUINATE HYDROXYCINNAMOYL TRANSFERASE); quinate O-hydroxycinnamoyltransferase/ shikimate O-hydroxycinnamoyltransferase/ transferase | chr5:19836654-19838092 REVERSEmoderately similar to ( 233) HCBT1_DIACA Anthranilate N-benzoyltransferase protein 1 (EC 2.3.1.144) (Anthranilate N-hydroxycinnamoyl/benzoyltran…	1.23403e-08	1.10647e-07
GRMZM2G125832	GRMZM2G125832_T01	3.84717	0.610844	7.80869	9.19822	transport.amino acids	highly similar to ( 729) AT1G47670 | Symbols: | amino acid transporter family protein | chr1:17536834-17539486 REVERSEhighly similar to ( 813) loc_os12g30040 12012.m06817 protein amino acid transporter-like protein 1, putative, expressed seq=cds; coord=3:103798946..103802578:1; parent_gene=GRMZM2G125832	2.79989e-20	7.7315e-19
GRMZM2G061403	GRMZM2G061403_T01	3.8429	0.556648	7.09913		misc.beta 1,3 glucan hydrolases.glucan endo-1,3-beta-glucosidase	moderately similar to ( 256) AT3G57260 | Symbols: BGL2, PR2, BG2, PR-2 | BGL2 (BETA-1,3-GLUCANASE 2); cellulase/ glucan 1,3-beta-glucosidase/ hydrolase, hydrolyzing O-glycosyl compounds | chr3:21188709-21189822 REVERSEmoderately similar to ( 339) E13E_HORVU Glucan endo-1,3-beta-glucosidase GV (EC 3.2.1.39) ((1->3)-beta-glucan endohydrolase GV) ((1->3)-beta-glucanase isoenzyme GV) (Beta-1,3-endogl…	1.54208e-13	2.39738e-12
GRMZM2G031925	GRMZM2G031925_T01	3.84208	11.9215	152.397	9.30264	not assigned.unknown	seq=cds; coord=10:7104194..7106706:-1; parent_gene=GRMZM2G031925	5.18897e-107	3.64583e-104
GRMZM2G043154	GRMZM2G043154_T01	3.80441	0.533934	6.63814	16.5756	stress.biotic	moderately similar to ( 313) AT5G17540 | Symbols: | transferase family protein | chr5:5782061-5783682 REVERSEweakly similar to ( 112) HCBT1_DIACA Anthranilate N-benzoyltransferase protein 1 (EC 2.3.1.144) (Anthranilate N-hydroxycinnamoyl/benzoyltransferase 1) - Dianthus caryophyllus (Carnation) (Clove pink)moderately similar to ( 482) loc_os05g04930 12005.m05022 protein taxadien-5-alpha-ol O-acet…	4.50204e-15	8.05907e-14
GRMZM2G104783	GRMZM2G104783_T01	3.80071	0.85486	10.6017	2.86244	misc.cytochrome P450	highly similar to ( 574) AT3G61880 | Symbols: CYP78A9 | CYP78A9 (CYTOCHROME P450 78A9); monooxygenase/ oxygen binding | chr3:22906114-22907890 REVERSEhighly similar to ( 545) C78A3_SOYBN Cytochrome P450 78A3 (EC 1.14.-.-) - Glycine max (Soybean)highly similar to ( 766) loc_os08g43390 12008.m08313 protein cytochrome P450 78A3, putative, expressed seq=cds; coord=4:215580165..215582701:-1; parent_ge…	9.85623e-29	4.83147e-27
GRMZM2G103342	GRMZM2G103342_T01	3.79897	2.62832	32.5261	1.44438	misc.peroxidases	moderately similar to ( 285) AT1G71695 | Symbols: | peroxidase 12 (PER12) (P12) (PRXR6) | chr1:26964359-26966557 FORWARDweakly similar to ( 191) PER1_SORBI Cationic peroxidase SPC4 precursor (EC 1.11.1.7) (Fragment) - Sorghum bicolor (Sorghum) (Sorghum vulgare)moderately similar to ( 379) loc_os01g73170 12001.m13346 protein peroxidase 12 precursor, putative, expressed seq=cds; coord=3:146522696..…	6.95932e-61	1.36457e-58
GRMZM2G027976	GRMZM2G027976_T01	3.79294	0.762184	9.39946		RNA.regulation of transcription.bZIP transcription factor family	weakly similar to ( 173) AT3G58120 | Symbols: ATBZIP61, BZIP61 | BZIP61; DNA binding / transcription activator/ transcription factor | chr3:21521289-21523078 REVERSEvery weakly similar to (92.0) RF2B_ORYSA Transcription factor RF2b - Oryza sativa (Rice)moderately similar to ( 226) loc_os01g55150 12001.m11675 protein transcription factor RF2b, putative, expressed seq=cds; coord=3:196153277..196156…	1.37203e-19	3.59628e-18
GRMZM2G361064	GRMZM2G361064_T01	3.78369	1.20524	14.7645	10.0934	cell wall.modification	moderately similar to ( 338) AT1G69530 | Symbols: ATEXPA1, EXP1, AT-EXP1, ATEXP1, ATHEXP ALPHA 1.2 | ATEXPA1 (ARABIDOPSIS THALIANA EXPANSIN A1) | chr1:26142034-26143200 FORWARDmoderately similar to ( 384) EXPA4_ORYSA Expansin-A4 precursor (OsEXPA4) (Alpha-expansin-4) (OsEXP4) (OsaEXPa1.22) - Oryza sativa (Rice)moderately similar to ( 384) loc_os05g39990 12005.m08176 protein alpha-expansin 1 precu…	3.53234e-25	1.33753e-23
GRMZM2G154211	GRMZM2G154211_T01	3.77439	0.487599	5.93987	9.7487	transport.sulphate	highly similar to ( 809) AT3G51895 | Symbols: SULTR3;1, AST12 | SULTR3;1 (SULFATE TRANSPORTER 3;1); secondary active sulfate transmembrane transporter/ sulfate transmembrane transporter/ transporter | chr3:19251503-19255677 REVERSEmoderately similar to ( 337) NO70_SOYBN Early nodulin 70 - Glycine max (Soybean)highly similar to ( 994) loc_os03g06520 12003.m06170 protein sulfate transporter 3.1, pu…	3.96881e-19	1.00689e-17
GRMZM2G152258	GRMZM2G152258_T01	3.75883	0.737043	8.86771		misc.nitrilases, *nitrile lyases, berberine bridge enzymes, reticuline oxidases, troponine reductases	moderately similar to ( 235) AT5G06060 | Symbols: | tropinone reductase, putative / tropine dehydrogenase, putative | chr5:1824066-1825833 REVERSEvery weakly similar to (93.2) FABG4_BRANA 3-oxoacyl-[acyl-carrier-protein] reductase 4 (EC 1.1.1.100) (3-ketoacyl-acyl carrier protein reductase 4) (Fragment) - Brassica napus (Rape)moderately similar to ( 281) loc_os11g43360 12011.m08171 protein tropin…	3.19598e-17	6.94495e-16
GRMZM2G084264	GRMZM2G084264_T01	3.75754	0.529788	6.37413		RNA.regulation of transcription.AP2/EREBP, APETALA2/Ethylene-responsive element binding protein family	very weakly similar to (87.0) AT1G21910 | Symbols: | AP2 domain-containing transcription factor family protein | chr1:7696655-7697347 FORWARDweakly similar to ( 165) loc_os06g10780 12006.m05795 protein DNA binding protein, putative, expressed seq=cds; coord=6:109899548..109900749:1; parent_gene=GRMZM2G084264	5.95858e-11	7.0494e-10
GRMZM2G028444	GRMZM2G028444_T01	3.75745	1.18146	14.2147	2.39202	not assigned.unknown	seq=cds; coord=5:142722839..142723377:-1; parent_gene=GRMZM2G028444	4.58469e-10	4.87453e-09
AC206223.3	AC206223.3_FGT006	3.75706	0.267565	3.2192	11.4664	protein.postranslational modification	highly similar to ( 610) AT5G58520 | Symbols: | protein kinase family protein | chr5:23655312-23657943 FORWARDnearly identical (1006) loc_os03g18430 12003.m07266 protein ATP binding protein, putative, expressed seq=cds; coord=9:137336819..137339379:1; parent_gene=AC206223.3_FG006	7.31286e-08	5.82955e-07
GRMZM2G423202	GRMZM2G423202_T01	3.73506	0.744198	8.81605		not assigned.unknown	moderately similar to ( 225) AT4G21700 | Symbols: | unknown protein | chr4:11529956-11532844 FORWARDhighly similar to ( 707) loc_os01g48620 12001.m11052 protein expressed protein seq=cds; coord=3:208969066..208971846:-1; parent_gene=GRMZM2G423202	1.70987e-27	7.66836e-26
GRMZM2G049877	GRMZM2G049877_T01	3.72723	1.03043	12.1221		transport.ABC transporters and multidrug resistance systems	highly similar to ( 782) AT3G55090 | Symbols: | ATPase, coupled to transmembrane movement of substances | chr3:20416342-20418552 REVERSEweakly similar to ( 172) PDR15_ORYSA Pleiotropic drug resistance protein 15 - Oryza sativa (Rice)highly similar to ( 973) loc_os01g61940 12001.m12317 protein ATPase, coupled to transmembrane movement of substances, putative, expressed seq=cds; coord=3:181816685..…	9.89033e-36	7.04693e-34
AF546187.1	AF546187.1_FGT012	3.72583	2.21113	26.012		not assigned.unknown	seq=cds; coord=1:162159727..162160559:1; parent_gene=AF546187.1_FG012	2.62827e-20	7.27346e-19
GRMZM2G082959	GRMZM2G082959_T01	3.71866	14.1017	164.902	2.25401	Biodegradation of Xenobiotics	weakly similar to ( 126) AT5G16080 | Symbols: AtCXE17 | AtCXE17 (Arabidopsis thaliana carboxyesterase 17); hydrolase | chr5:5252533-5253567 REVERSEmoderately similar to ( 463) loc_os05g33940 12005.m07626 protein hsr203J, putative, expressed seq=cds; coord=8:105086744..105088030:-1; parent_gene=GRMZM2G082959	3.62706e-107	2.62122e-104
GRMZM2G402977	GRMZM2G402977_T01	3.71489	4.76175	55.5722	53.6671	not assigned.unknown	weakly similar to ( 197) loc_os01g15060 12001.m08105 protein conserved hypothetical protein seq=cds; coord=3:35965170..35966263:-1; parent_gene=GRMZM2G402977	4.90169e-52	6.88797e-50
GRMZM2G018366	GRMZM2G018366_T01	3.71442	4.60785	53.7761	1.16615	not assigned.unknown	seq=cds; coord=7:130525130..130525820:1; parent_gene=GRMZM2G018366	1.16618e-38	9.70307e-37
GRMZM2G133095	GRMZM2G133095_T01	3.71013	0.735907	8.55891		not assigned.unknown	weakly similar to ( 110) AT5G12340 | Symbols: | unknown protein | chr5:3992948-3993610 REVERSEmoderately similar to ( 289) loc_os05g31970 12005.m07430 protein expressed protein seq=cds; coord=8:91312778..91313426:-1; parent_gene=GRMZM2G133095	1.32287e-07	1.00906e-06
GRMZM2G039919	GRMZM2G039919_T01	3.71008	0.533635	6.20641	27.0104	cell wall.modification	moderately similar to ( 240) AT1G14720 | Symbols: XTR2, EXGT-A2, ATXTH28 | XTR2 (XYLOGLUCAN ENDOTRANSGLYCOSYLASE RELATED 2); hydrolase, acting on glycosyl bonds / xyloglucan:xyloglucosyl transferase | chr1:5066806-5068466 REVERSEweakly similar to ( 134) XTH_WHEAT Probable xyloglucan endotransglucosylase/hydrolase precursor (EC 2.4.1.207) - Triticum aestivum (Wheat)moderately similar to ( 317) loc…	1.32287e-07	1.00906e-06
GRMZM2G127853	GRMZM2G127853_T01	3.68345	1.05431	12.0507	4.66943	misc.beta 1,3 glucan hydrolases	very weakly similar to (95.5) AT1G69295 | Symbols: PDCB4 | PDCB4 (PLASMODESMATA CALLOSE-BINDING PROTEIN 4); callose binding / polysaccharide binding | chr1:26050492-26051843 REVERSEweakly similar to ( 149) loc_os03g30830 12003.m08340 protein glucan endo-1,3-beta-glucosidase 4 precursor, putative, expressed seq=cds; coord=9:123735078..123737032:-1; parent_gene=GRMZM2G127853	5.69806e-18	1.32591e-16
GRMZM2G109865	GRMZM2G109865_T01	3.68246	47.5873	544.534	6.44967	transport.amino acids	highly similar to ( 602) AT1G47670 | Symbols: | amino acid transporter family protein | chr1:17536834-17539486 REVERSEhighly similar to ( 824) loc_os04g47420 12004.m09687 protein expressed protein seq=cds; coord=2:17689071..17691505:1; parent_gene=GRMZM2G109865	3.02152e-160	5.87896e-157
GRMZM2G141472	GRMZM2G141472_T01	3.67294	2.20995	25.055	13.423	not assigned.unknown	moderately similar to ( 459) loc_os03g51760 12003.m10156 protein F-box domain containing protein, expressed seq=cds; coord=1:271912364..271914236:1; parent_gene=GRMZM2G141472	4.23913e-45	4.74444e-43
AC231411.1	AC231411.1_FGT011	3.6586	0.39701	4.45818		lipid metabolism.lipid degradation.lipases.triacylglycerol lipase	moderately similar to ( 368) AT4G18550 | Symbols: | lipase class 3 family protein | chr4:10225006-10226862 REVERSEhighly similar to ( 525) loc_os05g49830 12005.m09053 protein triacylglycerol lipase, putative, expressed seq=cds; coord=6:165625344..165626546:1; parent_gene=AC231411.1_FG011	2.39224e-07	1.7576e-06
GRMZM2G035170	GRMZM2G035170_T01	3.65794	0.297387	3.33947		not assigned.unknown	moderately similar to ( 241) AT5G52060 | Symbols: ATBAG1 | ATBAG1 (ARABIDOPSIS THALIANA BCL-2-ASSOCIATED ATHANOGENE 1); protein binding | chr5:21152449-21153741 REVERSEmoderately similar to ( 342) loc_os09g35630 12009.m06514 protein protein binding protein, putative, expressed seq=cds; coord=2:194635980..194637906:-1; parent_gene=GRMZM2G035170	2.39224e-07	1.7576e-06
GRMZM2G031790	GRMZM2G031790_T01	3.65206	3.45553	38.6055	5.24714	lipid metabolism.FA synthesis and FA elongation.beta ketoacyl CoA synthase	moderately similar to ( 434) AT5G43760 | Symbols: KCS20 | KCS20 (3-KETOACYL-COA SYNTHASE 20); fatty acid elongase | chr5:17585903-17588486 FORWARDhighly similar to ( 583) loc_os03g06700 12003.m06188 protein fatty acid elongase, putative, expressed seq=cds; coord=1:12944095..12947312:1; parent_gene=GRMZM2G031790	2.60531e-61	5.23006e-59
GRMZM2G004060	GRMZM2G004060_T01	3.6454	14.2777	158.736	11.0846	RNA.regulation of transcription.WRKY domain transcription factor family	weakly similar to ( 147) loc_os05g25770 12005.m06869 protein OsWRKY45 - Superfamily of rice TFs having WRKY and zinc finger domains, expressed seq=cds; coord=10:12103219..12104937:1; parent_gene=GRMZM2G004060	4.83496e-109	3.70592e-106
GRMZM2G148534	GRMZM2G148534_T01	3.63981	9.25836	102.813	100.295	cell wall.cell wall proteins.AGPs.AGP	weakly similar to ( 166) AT4G12730 | Symbols: FLA2 | FLA2 (FASCICLIN-LIKE ARABINOGALACTAN 2) | chr4:7491598-7492809 REVERSEmoderately similar to ( 206) loc_os02g49420 12002.m09976 protein fasciclin-like arabinogalactan protein 10 precursor, putative, expressed seq=cds; coord=4:164170845..164172340:-1; parent_gene=GRMZM2G148534	1.01096e-90	5.21861e-88
GRMZM2G007406	GRMZM2G007406_T01	3.63741	5.39094	59.7937	1.53488	RNA.regulation of transcription.AP2/EREBP, APETALA2/Ethylene-responsive element binding protein family	very weakly similar to (83.6) AT1G21910 | Symbols: | AP2 domain-containing transcription factor family protein | chr1:7696655-7697347 FORWARDvery weakly similar to (94.7) loc_os03g15660 12003.m07003 protein AP2 domain containing protein, expressed seq=cds; coord=9:140949345..140950289:1; parent_gene=GRMZM2G007406	1.99681e-50	2.73013e-48
GRMZM2G423139	GRMZM2G423139_T01	3.62929	0.867919	9.54729		signalling.calcium	weakly similar to ( 109) loc_os03g59790 12003.m10875 protein calcium-binding protein, putative seq=cds; coord=5:2923164..2924447:-1; parent_gene=GRMZM2G423139	6.11259e-15	1.08347e-13
GRMZM2G419953	GRMZM2G419953_T01	3.62122	1.00442	10.9971	1.83023	misc.peroxidases	moderately similar to ( 288) AT1G05260 | Symbols: RCI3, RCI3A | RCI3 (RARE COLD INDUCIBLE GENE 3); peroxidase | chr1:1529827-1531271 FORWARDmoderately similar to ( 235) PER1_ORYSA Peroxidase 1 precursor (EC 1.11.1.7) - Oryza sativa (Rice)moderately similar to ( 408) loc_os02g06630 12002.m06011 protein peroxidase 39 precursor, putative, expressed seq=cds; coord=4:236885902..236889531:1; parent_gen…	3.82463e-20	1.04471e-18
GRMZM2G134162	GRMZM2G134162_T01	3.61658	1.38737	15.162	1.75558	protein.postranslational modification	moderately similar to ( 395) AT5G50860 | Symbols: | protein kinase family protein | chr5:20693778-20696983 REVERSEweakly similar to ( 172) CDC22_MEDSA Cell division control protein 2 homolog 2 (EC 2.7.11.22) - Medicago sativa (Alfalfa)highly similar to ( 670) loc_os01g70130 12001.m43356 protein transposon protein, putative, unclassified, expressed seq=cds; coord=8:160410961..160414026:1; parent_g…	1.10416e-23	3.78435e-22
GRMZM2G427451	GRMZM2G427451_T01	3.6111	3.19315	34.7137	35.2109	hormone metabolism.auxin.induced-regulated-responsive-activated	very weakly similar to (84.0) AT3G07390 | Symbols: AIR12 | AIR12; extracellular matrix structural constituent | chr3:2365452-2366273 FORWARDweakly similar to ( 191) loc_os08g41290 12008.m08107 protein AIR12, putative, expressed seq=cds; coord=1:191893507..191894902:1; parent_gene=GRMZM2G427451	1.12087e-45	1.31256e-43
GRMZM2G035542	GRMZM2G035542_T01	3.60791	0.254926	2.76042		transport.amino acids	nearly identical (1012) AT1G15690 | Symbols: AVP1, ATAVP3, AVP-3 | AVP1; ATPase/ hydrogen-translocating pyrophosphatase | chr1:5399115-5402185 FORWARDnearly identical (1003) AVP_HORVU Pyrophosphate-energized vacuolar membrane proton pump (EC 3.6.1.1) (Pyrophosphate-energized inorganic pyrophosphatase) (H(+)-PPase) - Hordeum vulgare (Barley)nearly identical (1119) loc_os01g23580 12001.m08831 prote…	8.01214e-09	7.3374e-08
AC233870.1	AC233870.1_FGT004	3.60691	0.327574	3.54708	4.55962	RNA.regulation of transcription.PWWP domain protein	very weakly similar to (95.9) AT3G21295 | Symbols: | FUNCTIONS IN: molecular_function unknown; INVOLVED IN: biological_process unknown; LOCATED IN: cellular_component unknown; CONTAINS InterPro DOMAIN/s: PWWP (InterPro:IPR000313); BEST Arabidopsis thaliana protein match is: unknown protein (TAIR:AT1G51745.1); Has 428 Blast hits to 314 proteins in 77 species: Archae - 0; Bacteria - 111; Metazoa - …	8.01214e-09	7.3374e-08
GRMZM2G407969	GRMZM2G407969_T01	3.60669	1.44073	15.6008		hormone metabolism.auxin.induced-regulated-responsive-activated	very weakly similar to (99.0) loc_os03g45860 12003.m09609 protein OsSAUR17 - Auxin-responsive SAUR gene family member seq=cds; coord=1:258690788..258700208:-1; parent_gene=GRMZM2G407969	8.01214e-09	7.3374e-08
GRMZM5G851266	GRMZM5G851266_T01	3.6064	0.219891	2.38105	6.90058	not assigned.unknown	moderately similar to ( 299) PPO2_IPOBA Polyphenol oxidase II, chloroplast precursor (EC 1.10.3.1) (PPO-II) (Catechol oxidase II) - Ipomoea batatas (Sweet potato) (Batate)moderately similar to ( 273) loc_os04g53300 12004.m10221 protein polyphenol oxidase II, chloroplast precursor, putative, expressed seq=cds; coord=10:59660107..59662383:1; parent_gene=GRMZM5G851266	4.32428e-07	3.03829e-06
GRMZM2G069335	GRMZM2G069335_T01	3.60629	0.778109	8.42563	3.30831	not assigned.unknown	weakly similar to ( 144) loc_os06g03810 12006.m05112 protein expressed protein seq=cds; coord=6:63536449..63537471:-1; parent_gene=GRMZM2G069335	2.62209e-11	3.23213e-10
GRMZM2G430052	GRMZM2G430052_T01	3.60608	1.59002	17.2173	1.20721	hormone metabolism.auxin.induced-regulated-responsive-activated	weakly similar to ( 128) loc_os09g32984 12009.m06391 protein calmodulin binding protein, putative seq=cds; coord=7:136142240..136143040:1; parent_gene=GRMZM2G430052	4.84232e-17	1.03622e-15
GRMZM2G107851	GRMZM2G107851_T01	3.60504	0.988827	10.7073	8.90896	stress.biotic	moderately similar to ( 266) AT5G17540 | Symbols: | transferase family protein | chr5:5782061-5783682 REVERSEweakly similar to ( 109) HCBT1_DIACA Anthranilate N-benzoyltransferase protein 1 (EC 2.3.1.144) (Anthranilate N-hydroxycinnamoyl/benzoyltransferase 1) - Dianthus caryophyllus (Carnation) (Clove pink)highly similar to ( 546) loc_os10g11980 12010.m04516 protein transferase family protein, ex…	6.36675e-20	1.70413e-18
GRMZM2G177356	GRMZM2G177356_T01	3.5941	11.6322	125.134	1.03901	not assigned.unknown	moderately similar to ( 268) loc_os02g31867 12002.m33278 protein expressed protein seq=cds; coord=5:166933448..166934843:1; parent_gene=GRMZM2G177356	1.22088e-94	7.01837e-92
GRMZM5G855994	GRMZM5G855994_T01	3.58597	17.8905	190.815		protein.degradation.ubiquitin.E3.RING	weakly similar to ( 155) AT5G37490 | Symbols: | U-box domain-containing protein | chr5:14887744-14889051 FORWARDmoderately similar to ( 380) loc_os06g13870 12006.m06102 protein immediate-early fungal elicitor protein CMPG1, putative, expressed seq=cds; coord=9:1077761..1079077:-1; parent_gene=GRMZM5G855994	2.58092e-109	2.04006e-106
GRMZM2G140752	GRMZM2G140752_T01	3.58284	0.523934	5.58328		signalling.receptor kinases.DUF 26	moderately similar to ( 484) AT4G05200 | Symbols: | protein kinase family protein | chr4:2679793-2682309 REVERSEweakly similar to ( 194) NORK_PEA Nodulation receptor kinase precursor (EC 2.7.11.1) - Pisum sativum (Garden pea)highly similar to ( 725) loc_os05g41370 12005.m08312 protein receptor-like protein kinase homolog RK20-1, putative, expressed seq=cds; coord=6:155625049..155628293:-1; parent…	3.08419e-14	5.15267e-13
GRMZM2G331393	GRMZM2G331393_T01	3.57519	3.56281	37.7896		transport.metabolite transporters at the mitochondrial membrane	moderately similar to ( 407) AT4G27970 | Symbols: SLAH2 | SLAH2 (SLAC1 HOMOLOGUE 2); transporter | chr4:13918290-13920122 REVERSEhighly similar to ( 545) loc_os05g50770 12005.m83963 protein C4-dicarboxylate transporter/malic acid transport protein, expressed seq=cds; coord=8:75414353..75416956:1; parent_gene=GRMZM2G331393	1.64042e-54	2.4846e-52
GRMZM2G077655	GRMZM2G077655_T01	3.56716	0.519841	5.47264		signalling.receptor kinases.wall associated kinase	moderately similar to ( 465) AT1G21240 | Symbols: WAK3 | WAK3 (wall associated kinase 3); kinase/ protein serine/threonine kinase | chr1:7434303-7436702 FORWARDmoderately similar to ( 215) CRI4_MAIZE Putative receptor protein kinase CRINKLY4 precursor (EC 2.7.11.1) - Zea mays (Maize)highly similar to ( 872) loc_os09g29510 12009.m06102 protein OsWAK80 - OsWAK receptor-like protein kinase, expresse…	1.41527e-16	2.92228e-15
GRMZM2G090177	GRMZM2G090177_T01	3.56574	0.499063	5.25391	3.78908	stress.abiotic.cold	very weakly similar to (86.7) AT5G23950 | Symbols: | C2 domain-containing protein | chr5:8082789-8083448 FORWARDweakly similar to ( 141) loc_os08g44850 12008.m08457 protein SRC2, putative, expressed seq=cds; coord=1:202765503..202766778:1; parent_gene=GRMZM2G090177	1.41889e-08	1.25928e-07
GRMZM2G150134	GRMZM2G150134_T01	3.56562	4.53157	47.6346		misc.peroxidases	moderately similar to ( 259) AT3G17070 | Symbols: | peroxidase, putative | chr3:5821048-5823165 FORWARDweakly similar to ( 165) PER1_ORYSA Peroxidase 1 precursor (EC 1.11.1.7) - Oryza sativa (Rice)moderately similar to ( 393) loc_os05g14260 12005.m05837 protein peroxidase 29 precursor, putative, expressed seq=cds; coord=8:110686795..110688334:1; parent_gene=GRMZM2G150134	3.21192e-54	4.80724e-52
GRMZM2G015972	GRMZM2G015972_T04	3.55173	0.299063	3.11841		cell.organisation	moderately similar to ( 267) AT1G60430 | Symbols: ARPC3 | ARPC3 (actin-related protein C3); structural molecule | chr1:22264797-22265682 REVERSEmoderately similar to ( 286) loc_os02g14000 12002.m34005 protein actin-related protein 2/3 complex subunit 3, putative, expressed seq=cds; coord=5:146917971..146922336:-1; parent_gene=GRMZM2G015972	7.81261e-07	5.23892e-06
AC165171.2	AC165171.2_FGT002	3.55117	3.29707	34.3794	30.3569	RNA.regulation of transcription.WRKY domain transcription factor family	weakly similar to ( 148) AT5G43290 | Symbols: WRKY49, ATWRKY49 | WRKY49; transcription factor | chr5:17371987-17373083 REVERSEmoderately similar to ( 243) loc_os01g74140 12001.m13441 protein OsWRKY17 - Superfamily of rice TFs having WRKY and zinc finger domains, expressed seq=cds; coord=3:144743920..144745323:1; parent_gene=AC165171.2_FG002	1.87343e-35	1.32735e-33
GRMZM2G010909	GRMZM2G010909_T01	3.54151	6.24058	64.6995	13.979	signalling.receptor kinases.misc	very weakly similar to (94.0) AT5G01740 | Symbols: | FUNCTIONS IN: molecular_function unknown; INVOLVED IN: biological_process unknown; LOCATED IN: cellular_component unknown; EXPRESSED IN: 18 plant structures; EXPRESSED DURING: 9 growth stages; CONTAINS InterPro DOMAIN/s: Wound-induced protein, Wun1 (InterPro:IPR009798); BEST Arabidopsis thaliana protein match is: SAG20 (SENESCENCE ASSOCIATED GE…	2.93267e-60	5.53575e-58
GRMZM2G045027	GRMZM2G045027_T01	3.53642	0.6266	6.46194		stress.biotic.PR-proteins	moderately similar to ( 350) AT3G14470 | Symbols: | disease resistance protein (NBS-LRR class), putative | chr3:4857940-4861104 FORWARDhighly similar to ( 728) loc_os10g36270 12010.m06438 protein disease resistance RPP13-like protein 1, putative, expressed seq=cds; coord=1:225341943..225345923:-1; parent_gene=GRMZM2G045027	1.27712e-25	4.96975e-24
GRMZM2G022514	GRMZM2G022514_T01	3.52388	0.254722	2.60498	9.79865	misc.myrosinases-lectin-jacalin	moderately similar to ( 311) AT5G06740 | Symbols: | lectin protein kinase family protein | chr5:2084094-2086052 FORWARDweakly similar to ( 166) PSKR_DAUCA Phytosulfokine receptor precursor (EC 2.7.11.1) (Phytosulfokine LRR receptor kinase) - Daucus carota (Carrot)highly similar to ( 822) loc_os02g48210 12002.m09855 protein lectin-like protein kinase, putative, expressed seq=cds; coord=4:161548954…	2.51182e-08	2.14728e-07
GRMZM2G037485	GRMZM2G037485_T01	3.51226	0.750949	7.61524		not assigned.unknown	moderately similar to ( 210) loc_os09g04310 12009.m03800 protein expressed protein seq=cds; coord=9:100740103..100741586:1; parent_gene=GRMZM2G037485	1.55942e-13	2.42136e-12
GRMZM5G836174	GRMZM5G836174_T02	3.50832	5.3799	54.4245	9.33628	misc.acid and other phosphatases	moderately similar to ( 266) AT1G73010 | Symbols: | phosphatase | chr1:27464780-27466180 REVERSEmoderately similar to ( 330) loc_os01g52230 12001.m11397 protein phosphatase phospho1, putative, expressed seq=cds; coord=8:155438410..155439859:-1; parent_gene=GRMZM5G836174	8.45963e-61	1.63342e-58
GRMZM2G568636	GRMZM2G568636_T01	3.50598	0.245151	2.47761	2.43207	N-metabolism.nitrate metabolism.NR	nearly identical (1263) AT1G77760 | Symbols: NIA1, GNR1, NR1 | NIA1 (NITRATE REDUCTASE 1); nitrate reductase | chr1:29236005-29239367 REVERSEnearly identical (1660) NIA1_ORYSA Nitrate reductase [NADH] 1 (EC 1.7.1.1) (NR1) - Oryza sativa (Rice)nearly identical (1660) loc_os08g36480 12008.m07637 protein nitrate reductase 1, putative, expressed seq=cds; coord=4:56308168..56313225:1; parent_gene=GRMZ…	1.45925e-10	1.65442e-09
GRMZM2G153871	GRMZM2G153871_T01	3.50202	0.631438	6.36259		secondary metabolism.phenylpropanoids.lignin biosynthesis.PAL	moderately similar to ( 440) AT2G37040 | Symbols: pal1, ATPAL1 | pal1 (Phe ammonia lyase 1); phenylalanine ammonia-lyase | chr2:15557602-15560237 REVERSEhighly similar to ( 561) PAL2_ORYSA Phenylalanine ammonia-lyase (EC 4.3.1.5) - Oryza sativa (Rice)highly similar to ( 561) loc_os02g41680 12002.m09204 protein phenylalanine ammonia-lyase, putative, expressed seq=cds; coord=4:231695319..231697748:…	1.21463e-15	2.32046e-14
GRMZM2G301908	GRMZM2G301908_T01	3.50133	1.14384	11.5101	13.3688	cell wall.cell wall proteins.AGPs.AGP	weakly similar to ( 146) AT5G55730 | Symbols: FLA1 | FLA1 (FASCICLIN-LIKE ARAB INOGALACTAN 1) | chr5:22558375-22560392 REVERSEmoderately similar to ( 236) loc_os08g38270 12008.m07812 protein fasciclin-like arabinogalactan protein 10 precursor, putative, expressed seq=cds; coord=4:197674970..197676500:1; parent_gene=GRMZM2G301908	2.29849e-20	6.4241e-19
GRMZM2G361984	GRMZM2G361984_T01	3.4947	0.532445	5.33842		minor CHO metabolism.raffinose family.galactinol synthases.putative	moderately similar to ( 390) AT2G47180 | Symbols: AtGolS1 | AtGolS1 (Arabidopsis thaliana galactinol synthase 1); transferase, transferring glycosyl groups / transferase, transferring hexosyl groups | chr2:19369049-19370372 REVERSEmoderately similar to ( 411) loc_os07g48830 12007.m09092 protein galactinol synthase 3, putative, expressed seq=cds; coord=7:174158639..174179366:1; parent_gene=GRMZM2G…	1.4106e-06	9.03967e-06
GRMZM2G058227	GRMZM2G058227_T01	3.4929	2.47207	24.7459	13.914	lipid metabolism.lipid degradation.lysophospholipases.glycerophosphodiester phosphodiesterase	moderately similar to ( 486) AT5G08030 | Symbols: | glycerophosphoryl diester phosphodiesterase family protein | chr5:2575152-2576770 REVERSEhighly similar to ( 581) loc_os03g40670 12003.m09142 protein glycerophosphoryl diester phosphodiesterase precursor, putative, expressed seq=cds; coord=1:249418817..249421594:1; parent_gene=GRMZM2G058227	1.9306e-38	1.58547e-36
GRMZM2G038217	GRMZM2G038217_T01	3.48931	1.36789	13.6726	2.66295	not assigned.unknown	weakly similar to ( 122) AT1G55265 | Symbols: | unknown protein | chr1:20617326-20617853 FORWARDweakly similar to ( 175) loc_os03g48626 12003.m35577 protein expressed protein seq=cds; coord=1:262610139..262615251:-1; parent_gene=GRMZM2G038217	1.12852e-22	3.64092e-21
GRMZM2G029407	GRMZM2G029407_T01	3.48749	0.674296	6.7336		signalling.receptor kinases.leucine rich repeat III	moderately similar to ( 342) AT4G31250 | Symbols: | leucine-rich repeat transmembrane protein kinase, putative | chr4:15179201-15181751 REVERSEweakly similar to ( 140) PSKR_DAUCA Phytosulfokine receptor precursor (EC 2.7.11.1) (Phytosulfokine LRR receptor kinase) - Daucus carota (Carrot)highly similar to ( 506) loc_os02g07810 12002.m06127 protein ATP binding protein, putative, expressed seq=cds; …	3.80827e-18	8.99406e-17
GRMZM2G070673	GRMZM2G070673_T01	3.46131	0.67704	6.633	2.54569	signalling.calcium	weakly similar to ( 187) AT4G14750 | Symbols: IQD19 | IQD19 (IQ-domain 19); calmodulin binding | chr4:8470449-8471903 FORWARDmoderately similar to ( 314) loc_os10g28420 12010.m05722 protein IQ calmodulin-binding motif family protein seq=cds; coord=1:240038938..240040880:1; parent_gene=GRMZM2G070673	4.59781e-13	6.82896e-12
GRMZM2G122762	GRMZM2G122762_T01	3.46028	4.91914	48.2085		not assigned.unknown	weakly similar to ( 110) loc_os01g41140 12001.m10382 protein expressed protein seq=cds; coord=3:222621530..222623459:-1; parent_gene=GRMZM2G122762	8.89973e-63	1.89168e-60
GRMZM2G142709	GRMZM2G142709_T01	3.45733	2.83368	27.6879		misc.UDP glucosyl and glucoronyl transferases	moderately similar to ( 419) AT1G70090 | Symbols: GATL9, LGT8 | LGT8 (GLUCOSYL TRANSFERASE FAMILY 8); polygalacturonate 4-alpha-galacturonosyltransferase/ transferase, transferring glycosyl groups / transferase, transferring hexosyl groups | chr1:26400927-26402099 FORWARDhighly similar to ( 596) loc_os02g50600 12002.m10094 protein transferase, transferring glycosyl groups, putative, expressed seq…	1.49519e-45	1.72691e-43
GRMZM2G030636	GRMZM2G030636_T01	3.45338	0.73534	7.16626	3.42423	not assigned.unknown	moderately similar to ( 445) AT4G24140 | Symbols: | hydrolase, alpha/beta fold family protein | chr4:12530032-12533664 REVERSEhighly similar to ( 712) loc_os10g38860 12010.m06653 protein catalytic/ hydrolase, putative, expressed seq=cds; coord=1:82022572..82026326:-1; parent_gene=GRMZM2G030636	1.06291e-17	2.40477e-16
GRMZM2G021459	GRMZM2G021459_T01	3.4488	2.93652	28.5169		not assigned.unknown	seq=cds; coord=2:45766851..45767609:1; parent_gene=GRMZM2G021459	6.09842e-24	2.12764e-22
GRMZM2G311036	GRMZM2G311036_T01	3.43782	1.13347	10.9099		secondary metabolism.phenylpropanoids	weakly similar to ( 162) AT4G35160 | Symbols: | O-methyltransferase family 2 protein | chr4:16730989-16732808 REVERSEmoderately similar to ( 343) ZRP4_MAIZE O-methyltransferase ZRP4 (EC 2.1.1.-) (OMT) - Zea mays (Maize)moderately similar to ( 340) loc_os05g43930 12005.m08519 protein O-methyltransferase ZRP4, putative, expressed seq=cds; coord=1:66304872..66306978:1; parent_gene=GRMZM2G311036	1.7665e-19	4.56869e-18
GRMZM2G022347	GRMZM2G022347_T01	3.43699	0.687694	6.61918		stress.abiotic.unspecified	weakly similar to ( 119) AT5G45880 | Symbols: | pollen Ole e 1 allergen and extensin family protein | chr5:18609934-18611066 REVERSEmoderately similar to ( 266) PSC13_MAIZE Pollen-specific protein C13 precursor - Zea mays (Maize)moderately similar to ( 238) loc_os04g32680 12004.m08366 protein pollen-specific protein C13 precursor, putative, expressed seq=cds; coord=2:62923977..62924902:1; parent_…	7.86026e-08	6.2423e-07
GRMZM2G436730	GRMZM2G436730_T01	3.43596	0.650243	6.25871	20.0767	cell wall.cell wall proteins.LRR	moderately similar to ( 361) AT4G29240 | Symbols: | leucine-rich repeat family protein / extensin family protein | chr4:14418826-14420073 FORWARDweakly similar to ( 112) RPK1_IPONI Receptor-like protein kinase precursor (EC 2.7.11.1) - Ipomoea nil (Japanese morning glory) (Pharbitis nil)highly similar to ( 520) loc_os05g09640 12005.m05477 protein BRASSINOSTEROID INSENSITIVE 1 precursor, putative,…	1.83202e-11	2.29743e-10
GRMZM2G473743	GRMZM2G473743_T01	3.43551	1.66219	15.9989		not assigned.unknown	seq=cds; coord=8:13441474..13442335:1; parent_gene=GRMZM2G473743	3.19517e-16	6.4346e-15
GRMZM2G437912	GRMZM2G437912_T01	3.43081	42.185	405.148	78.3334	amino acid metabolism.synthesis.aromatic aa.phenylalanine.arogenate dehydratase / prephenate dehydratase	highly similar to ( 569) AT1G08250 | Symbols: ADT6 | ADT6 (arogenate dehydratase 6); arogenate dehydratase/ prephenate dehydratase | chr1:2588994-2590235 REVERSEhighly similar to ( 732) loc_os04g33390 12004.m08428 protein P-protein, putative, expressed seq=cds; coord=2:59037243..59039178:-1; parent_gene=GRMZM2G437912	1.90209e-137	2.40558e-134
GRMZM2G059299	GRMZM2G059299_T01	3.42357	130.753	1249.48		misc.myrosinases-lectin-jacalin	very weakly similar to (94.4) AT1G78860 | Symbols: | curculin-like (mannose-binding) lectin family protein | chr1:29646168-29647499 REVERSEvery weakly similar to (89.7) EP1G_DAUCA Epidermis-specific secreted glycoprotein EP1 precursor (52/54 kDa medium protein) - Daucus carota (Carrot)highly similar to ( 540) loc_os01g72810 12001.m13314 protein secreted glycoprotein, putative, expressed seq=cds; …	6.2018e-158	1.12049e-154
AC186231.4	AC186231.4_FGT002	3.42281	24.4488	233.499	379.498	not assigned.unknown	seq=cds; coord=1:202624720..202625559:1; parent_gene=AC186231.4_FG002	9.34731e-94	5.03045e-91
GRMZM2G092813	GRMZM2G092813_T01	3.42137	21.3876	203.426		lipid metabolism.FA synthesis and FA elongation.acyl coa ligase	highly similar to ( 578) AT1G65880 | Symbols: BZO1 | BZO1 (BENZOYLOXYGLUCOSINOLATE 1); benzoate-CoA ligase | chr1:24508633-24510737 REVERSEweakly similar to ( 148) 4CL1_ORYSA 4-coumarate--CoA ligase 1 (EC 6.2.1.12) (4CL 1) (4-coumaroyl-CoA synthase 1) - Oryza sativa (Rice)highly similar to ( 839) loc_os03g03790 12003.m05911 protein acyl-activating enzyme 11, putative, expressed seq=cds; coord=1:6…	3.52626e-120	3.43051e-117
GRMZM2G026926	GRMZM2G026926_T01	3.41796	0.719716	6.84081		RNA.regulation of transcription.AP2/EREBP, APETALA2/Ethylene-responsive element binding protein family	weakly similar to ( 156) AT2G20880 | Symbols: | AP2 domain-containing transcription factor, putative | chr2:8986053-8987063 FORWARDvery weakly similar to (87.0) ERF1_ORYSA Ethylene-responsive transcription factor 1 (Ethylene-responsive element-binding factor 1) (EREBP-1) (OsEREBP1) - Oryza sativa (Rice)moderately similar to ( 340) loc_os04g44670 12004.m09426 protein AP2 domain containing protein,…	2.97044e-17	6.48268e-16
GRMZM2G453805	GRMZM2G453805_T01	3.40817	4.69967	44.387		stress.biotic	moderately similar to ( 344) AT5G24090 | Symbols: | acidic endochitinase (CHIB1) | chr5:8143805-8145153 REVERSEmoderately similar to ( 363) CHIA_PHAAN Acidic endochitinase precursor (EC 3.2.1.14) - Phaseolus angularis (Adzuki bean) (Vigna angularis)moderately similar to ( 443) loc_os01g47070 12001.m10903 protein acidic endochitinase precursor, putative, expressed seq=cds; coord=3:212009199..21201…	8.53175e-50	1.14181e-47
GRMZM2G107711	GRMZM2G107711_T01	3.40563	1.06966	10.0812	102.147	not assigned.unknown	seq=cds; coord=2:9266461..9267353:-1; parent_gene=GRMZM2G107711	3.19277e-11	3.89759e-10
GRMZM2G106445	GRMZM2G106445_T01	3.40459	10.3864	97.7174	72.7384	stress.abiotic.touch/wounding	very weakly similar to (86.3) loc_os04g54280 12004.m10320 protein retrotransposon protein, putative, unclassified seq=cds; coord=2:6974430..6975364:-1; parent_gene=GRMZM2G106445	4.63665e-64	1.01103e-61
GRMZM2G058220	GRMZM2G058220_T01	3.3902	0.427386	3.98511		protein.postranslational modification.kinase.receptor like cytoplasmatic kinase VII	moderately similar to ( 393) AT5G35370 | Symbols: | ATP binding / carbohydrate binding / kinase/ protein kinase/ protein serine/threonine kinase/ protein tyrosine kinase/ sugar binding | chr5:13588564-13591182 REVERSEmoderately similar to ( 206) KPRO_MAIZE Putative receptor protein kinase ZmPK1 precursor (EC 2.7.11.1) - Zea mays (Maize)highly similar to ( 568) loc_os02g52850 12002.m10315 protein …	3.08419e-14	5.15267e-13
GRMZM2G434541	GRMZM2G434541_T01	3.37912	2.77838	25.7396	6.18772	misc.glutathione S transferases	weakly similar to ( 122) AT1G10370 | Symbols: GST30, ATGSTU17, GST30B, ERD9 | ERD9 (EARLY-RESPONSIVE TO DEHYDRATION 9); glutathione transferase | chr1:3397274-3398273 REVERSEweakly similar to ( 126) GSTU6_ORYSA Probable glutathione S-transferase GSTU6 (EC 2.5.1.18) (28 kDa cold-induced protein) - Oryza sativa (Rice)weakly similar to ( 149) loc_os01g49710 12001.m11158 protein glutathione S-transfe…	1.39075e-16	2.87869e-15
GRMZM2G142999	GRMZM2G142999_T01	3.37583	0.839374	7.74249		RNA.regulation of transcription.ABI3/VP1-related B3-domain-containing transcription factor family	weakly similar to ( 154) AT3G61970 | Symbols: NGA2 | NGA2 (NGATHA2); transcription factor | chr3:22951829-22952728 FORWARDmoderately similar to ( 278) loc_os10g39190 12010.m06689 protein RAV, putative seq=cds; coord=9:125563700..125564837:-1; parent_gene=GRMZM2G142999	5.56422e-11	6.59828e-10
EF517601.1	EF517601.1_FGT016	3.37493	2.46824	22.7673	832.046	not assigned.unknown	weakly similar to ( 101) MFS18_MAIZE MFS18 protein precursor - Zea mays (Maize) seq=cds; coord=3:34680724..34681110:-1; parent_gene=EF517601.1_FG016	5.56422e-11	6.59828e-10
GRMZM2G053111	GRMZM2G053111_T01	3.36332	2.59567	23.7346		signalling.receptor kinases.crinkly like	moderately similar to ( 388) AT5G47850 | Symbols: CCR4 | CCR4 (ARABIDOPSIS THALIANA CRINKLY4 RELATED 4); kinase | chr5:19378803-19381058 REVERSEmoderately similar to ( 218) CRI4_MAIZE Putative receptor protein kinase CRINKLY4 precursor (EC 2.7.11.1) - Zea mays (Maize)highly similar to ( 959) loc_os04g35890 12004.m08678 protein protein kinase, putative, expressed seq=cds; coord=2:48145794..4814855…	7.4276e-52	1.03798e-49
GRMZM2G169973	GRMZM2G169973_T01	3.34794	5.70112	51.6388	28.3122	not assigned.unknown	weakly similar to ( 162) loc_os01g12690 12001.m07882 protein plant-specific domain TIGR01568 family protein, expressed seq=cds; coord=3:2145765..2147244:-1; parent_gene=GRMZM2G169973	7.34817e-57	1.17636e-54
GRMZM2G154090	GRMZM2G154090_T01	3.34729	2.28556	20.6714		transport.phosphate	highly similar to ( 755) AT2G38940 | Symbols: ATPT2, PHT1;4 | ATPT2 (ARABIDOPSIS THALIANA PHOSPHATE TRANSPORTER 2); carbohydrate transmembrane transporter/ inorganic phosphate transmembrane transporter/ phosphate transmembrane transporter/ sugar:hydrogen symporter | chr2:16258500-16260104 FORWARDhighly similar to ( 851) loc_os10g30790 12010.m21787 protein inorganic phosphate transporter 1-4, puta…	1.06011e-37	8.43221e-36
GRMZM2G108153	GRMZM2G108153_T01	3.34585	10.108	91.3233		misc.peroxidases	moderately similar to ( 217) AT1G71695 | Symbols: | peroxidase 12 (PER12) (P12) (PRXR6) | chr1:26964359-26966557 FORWARDmoderately similar to ( 206) PER1_WHEAT Peroxidase precursor (EC 1.11.1.7) (WP2) - Triticum aestivum (Wheat)moderately similar to ( 346) loc_os04g59160 12004.m10793 protein peroxidase 12 precursor, putative, expressed seq=cds; coord=2:24834408..24836108:-1; parent_gene=GRMZM2G10…	1.21656e-82	5.04455e-80
GRMZM2G520811	GRMZM2G520811_T01	3.34459	0.721456	6.51013	2.0693	not assigned.unknown	weakly similar to ( 126) AT5G47920 | Symbols: | unknown protein | chr5:19403458-19404021 REVERSEmoderately similar to ( 230) loc_os04g31350 12004.m08237 protein expressed protein seq=cds; coord=2:72673592..72674915:1; parent_gene=GRMZM2G520811	1.68966e-10	1.90202e-09
GRMZM2G383404	GRMZM2G383404_T01	3.34374	0.506473	4.57021	2.13629	misc.UDP glucosyl and glucoronyl transferases	weakly similar to ( 179) AT4G15280 | Symbols: UGT71B5 | UGT71B5 (UDP-GLUCOSYL TRANSFERASE 71B5); UDP-glycosyltransferase/ quercetin 3-O-glucosyltransferase/ transferase, transferring glycosyl groups | chr4:8719182-8720618 FORWARDweakly similar to ( 115) ZOX_PHAVU Zeatin O-xylosyltransferase (EC 2.4.2.40) (Zeatin O-beta-D-xylosyltransferase) - Phaseolus vulgaris (Kidney bean) (French bean)highly s…	1.68966e-10	1.90202e-09
GRMZM2G416750	GRMZM2G416750_T01	3.33742	9.36478	84.4345	4.21339	protein.degradation.ubiquitin.E3.RING	weakly similar to ( 115) AT1G53820 | Symbols: | zinc finger (C3HC4-type RING finger) family protein | chr1:20091491-20092423 FORWARDweakly similar to ( 102) EL5_ORYSA E3 ubiquitin-protein ligase EL5 (EC 6.3.2.-) - Oryza sativa (Rice)moderately similar to ( 263) loc_os06g09310 12006.m05650 protein znf, putative, expressed seq=cds; coord=6:107359941..107361317:1; parent_gene=GRMZM2G416750	1.40564e-71	4.08669e-69
GRMZM2G143756	GRMZM2G143756_T01	3.33531	1.47356	13.2286		transport.ABC transporters and multidrug resistance systems	highly similar to ( 803) AT3G55090 | Symbols: | ATPase, coupled to transmembrane movement of substances | chr3:20416342-20418552 REVERSEweakly similar to ( 179) PDR15_ORYSA Pleiotropic drug resistance protein 15 - Oryza sativa (Rice)nearly identical (1053) loc_os01g61940 12001.m12317 protein ATPase, coupled to transmembrane movement of substances, putative, expressed seq=cds; coord=8:169252975..1…	2.24038e-34	1.47959e-32
GRMZM2G015908	GRMZM2G015908_T01	3.33152	7.47666	67.0011	20.0963	misc.acid and other phosphatases	moderately similar to ( 270) AT1G73010 | Symbols: | phosphatase | chr1:27464780-27466180 REVERSEmoderately similar to ( 382) loc_os01g52230 12001.m11397 protein phosphatase phospho1, putative, expressed seq=cds; coord=3:202182374..202183608:-1; parent_gene=GRMZM2G015908	2.38596e-59	4.22032e-57
GRMZM2G021909	GRMZM2G021909_T01	3.32383	1.8099	16.0805		not assigned.unknown	moderately similar to ( 306) AT2G25430 | Symbols: | epsin N-terminal homology (ENTH) domain-containing protein | chr2:10822716-10824677 FORWARDhighly similar to ( 506) loc_os05g02140 12005.m04750 protein clathrin assembly protein, putative, expressed seq=cds; coord=6:37025125..37027411:1; parent_gene=GRMZM2G021909	5.05449e-34	3.25313e-32
GRMZM2G083350	GRMZM2G083350_T01	3.32112	7.07031	62.7961		RNA.regulation of transcription.WRKY domain transcription factor family	moderately similar to ( 208) AT5G15130 | Symbols: WRKY72, ATWRKY72 | WRKY72; transcription factor | chr5:4904426-4906879 FORWARDmoderately similar to ( 367) loc_os01g09080 12001.m07532 protein WRKY transcription factor 61, putative, expressed seq=cds; coord=8:19851097..19853367:-1; parent_gene=GRMZM2G083350	5.59304e-74	1.79076e-71
GRMZM2G059562	GRMZM2G059562_T01	3.31744	6.61416	58.6657	16.1941	RNA.regulation of transcription.WRKY domain transcription factor family	weakly similar to ( 148) loc_os01g60640 12001.m12192 protein OsWRKY21 - Superfamily of rice TFs having WRKY and zinc finger domains, expressed seq=cds; coord=3:184816891..184818185:-1; parent_gene=GRMZM2G059562	2.47565e-48	3.16258e-46
GRMZM2G419994	GRMZM2G419994_T01	3.31568	2.34747	20.7975	11.4498	not assigned.unknown	seq=cds; coord=4:236903207..236904698:-1; parent_gene=GRMZM2G419994	1.04658e-29	5.40248e-28
GRMZM2G060544	GRMZM2G060544_T01	3.31234	17.3339	153.826	55.8778	RNA.regulation of transcription.AS2,Lateral Organ Boundaries Gene Family	weakly similar to ( 194) AT3G02550 | Symbols: LBD41 | LBD41 (LOB DOMAIN-CONTAINING PROTEIN 41) | chr3:536747-537650 REVERSEmoderately similar to ( 226) loc_os01g32770 12001.m09596 protein seed specific protein Bn15D17A, putative, expressed seq=cds; coord=1:72351668..72352962:-1; parent_gene=GRMZM2G060544	3.18178e-90	1.6096e-87
GRMZM2G064655	GRMZM2G064655_T01	3.29742	5.09511	44.6196	17.1647	RNA.regulation of transcription.C2C2(Zn) DOF zinc finger family	weakly similar to ( 120) AT5G60200 | Symbols: | Dof-type zinc finger domain-containing protein | chr5:24241078-24241951 FORWARDweakly similar to ( 121) PBF_MAIZE Dof zinc finger protein PBF (Prolamin box-binding factor) - Zea mays (Maize)weakly similar to ( 142) loc_os07g32510 12007.m07514 protein expressed protein seq=cds; coord=2:202417739..202419644:1; parent_gene=GRMZM2G064655	2.32265e-59	4.13726e-57
GRMZM2G040121	GRMZM2G040121_T01	3.29593	1.7861	15.6157	10.0048	development.unspecified	moderately similar to ( 254) AT2G33380 | Symbols: RD20 | RD20 (RESPONSIVE TO DESSICATION 20); calcium ion binding | chr2:14144984-14146374 REVERSEmoderately similar to ( 387) loc_os03g12230 12003.m101244 protein caleosin, putative, expressed seq=cds; coord=1:27799309..27804433:1; parent_gene=GRMZM2G040121	2.069e-21	6.12588e-20
GRMZM2G129815	GRMZM2G129815_T01	3.29471	0.628633	5.48345		not assigned.unknown	very weakly similar to (89.4) loc_os03g20330 12003.m07443 protein VQ motif family protein, expressed seq=cds; coord=9:134088631..134089643:1; parent_gene=GRMZM2G129815	7.63305e-07	5.13895e-06
GRMZM2G444817	GRMZM2G444817_T01	3.29453	1.41198	12.3165		not assigned.unknown	seq=cds; coord=8:155976391..155976841:-1; parent_gene=GRMZM2G444817	7.63305e-07	5.13895e-06
GRMZM2G109130	GRMZM2G109130_T01	3.29442	2.75339	24.0505		hormone metabolism.jasmonate.synthesis-degradation.lipoxygenase	highly similar to ( 982) AT1G55020 | Symbols: LOX1 | LOX1; lipoxygenase | chr1:20525798-20530143 FORWARDnearly identical (1494) LOX3_ORYSA Putative lipoxygenase 3 (EC 1.13.11.12) - Oryza sativa (Rice)nearly identical (1409) loc_os03g52860 12003.m10259 protein lipoxygenase 2, putative, expressed seq=cds; coord=1:264200949..264205758:1; parent_gene=GRMZM2G109130	1.34833e-52	1.916e-50
GRMZM2G075290	GRMZM2G075290_T01	3.29388	0.490227	4.27616	1.36473	stress.abiotic.drought/salt	moderately similar to ( 307) AT3G62730 | Symbols: | unknown protein | chr3:23208003-23209436 REVERSEmoderately similar to ( 414) loc_os03g22470 12003.m07649 protein desiccation-related protein PCC13-62 precursor, putative, expressed seq=cds; coord=1:58418770..58420264:-1; parent_gene=GRMZM2G075290	7.63305e-07	5.13895e-06
GRMZM2G014392	GRMZM2G014392_T01	3.27645	17.4907	150.743	10.9609	hormone metabolism.abscisic acid.synthesis-degradation.synthesis.9-cis-epoxycarotenoid dioxygenase	highly similar to ( 737) AT3G14440 | Symbols: NCED3, ATNCED3, STO1, SIS7 | NCED3 (NINE-CIS-EPOXYCAROTENOID DIOXYGENASE 3); 9-cis-epoxycarotenoid dioxygenase | chr3:4831678-4833477 REVERSEnearly identical (1007) loc_os03g44380 12003.m09477 protein 9-cis-epoxycarotenoid dioxygenase 2, putative, expressed seq=cds; coord=1:250892567..250895242:-1; parent_gene=GRMZM2G014392	3.73129e-112	3.04449e-109
GRMZM2G133430	GRMZM2G133430_T01	3.26727	18.5623	158.948	6.60223	not assigned.unknown	weakly similar to ( 110) loc_os06g38210 12006.m31806 protein expressed protein seq=cds; coord=5:156351191..156352142:1; parent_gene=GRMZM2G133430	3.21565e-79	1.21398e-76
GRMZM2G048022	GRMZM2G048022_T01	3.26639	1.12201	9.59963	1.00963	not assigned.unknown	very weakly similar to (94.4) loc_os01g07240 12001.m07350 protein expressed protein seq=cds; coord=3:13723366..13724642:1; parent_gene=GRMZM2G048022	3.66736e-14	6.07878e-13
GRMZM2G022162	GRMZM2G022162_T01	3.26045	1.56219	13.3277	12.0764	RNA.regulation of transcription.CCAAT box binding factor family, HAP5	weakly similar to ( 130) AT1G56170 | Symbols: HAP5B, ATHAP5B, NF-YC2 | NF-YC2 (NUCLEAR FACTOR Y, SUBUNIT C2); DNA binding / transcription activator/ transcription factor | chr1:21025118-21025717 FORWARDweakly similar to ( 141) loc_os09g30310 12009.m06182 protein nuclear transcription factor Y subunit C-2, putative, expressed seq=cds; coord=2:189204687..189208176:-1; parent_gene=GRMZM2G022162	4.46671e-16	8.91016e-15
GRMZM2G148930	GRMZM2G148930_T01	3.24491	3.42221	28.822	3.18721	signalling.receptor kinases.misc	very weakly similar to (95.5) AT5G01740 | Symbols: | FUNCTIONS IN: molecular_function unknown; INVOLVED IN: biological_process unknown; LOCATED IN: cellular_component unknown; EXPRESSED IN: 18 plant structures; EXPRESSED DURING: 9 growth stages; CONTAINS InterPro DOMAIN/s: Wound-induced protein, Wun1 (InterPro:IPR009798); BEST Arabidopsis thaliana protein match is: SAG20 (SENESCENCE ASSOCIATED GE…	4.10811e-31	2.26384e-29
GRMZM2G336824	GRMZM2G336824_T01	3.2444	0.509607	4.29193		secondary metabolism.phenylpropanoids	weakly similar to ( 161) AT4G35160 | Symbols: | O-methyltransferase family 2 protein | chr4:16730989-16732808 REVERSEmoderately similar to ( 342) ZRP4_MAIZE O-methyltransferase ZRP4 (EC 2.1.1.-) (OMT) - Zea mays (Maize)moderately similar to ( 337) loc_os05g43940 12005.m08520 protein O-methyltransferase ZRP4, putative, expressed seq=cds; coord=1:66387644..66390084:1; parent_gene=GRMZM2G336824	1.41889e-08	1.25928e-07
GRMZM2G129064	GRMZM2G129064_T01	3.24336	3.42895	28.8787		misc.oxidases - copper, flavone etc.	highly similar to ( 684) AT3G13390 | Symbols: sks11 | sks11 (SKU5 Similar 11); copper ion binding / oxidoreductase | chr3:4351401-4353289 REVERSEhighly similar to ( 683) NTP3_TOBAC Pollen-specific protein NTP303 precursor - Nicotiana tabacum (Common tobacco)highly similar to ( 927) loc_os05g40740 12005.m083761 protein pollen-specific protein NTP303 precursor, putative, expressed seq=cds; coord=6:…	1.39856e-49	1.8521e-47
GRMZM2G017429	GRMZM2G017429_T01	3.24316	1.05993	8.92675	7.40358	RNA.regulation of transcription.unclassified	weakly similar to ( 144) AT5G07900 | Symbols: | mitochondrial transcription termination factor family protein / mTERF family protein | chr5:2520188-2521405 FORWARDhighly similar to ( 549) loc_os02g51450 12002.m33454 protein mTERF family protein, expressed seq=cds; coord=5:207899002..207900503:1; parent_gene=GRMZM2G017429	8.61806e-15	1.51169e-13
GRMZM2G163172	GRMZM2G163172_T01	3.24305	0.36514	3.07522		cell.vesicle transport	weakly similar to ( 122) AT5G50380 | Symbols: ATEXO70F1 | ATEXO70F1 (exocyst subunit EXO70 family protein F1); protein binding | chr5:20516382-20518433 REVERSEmoderately similar to ( 437) loc_os06g08460 12006.m05565 protein exo70 exocyst complex subunit family protein, expressed seq=cds; coord=4:86877721..86879464:-1; parent_gene=GRMZM2G163172	1.34425e-06	8.64734e-06
GRMZM2G077498	GRMZM2G077498_T01	3.24214	1.3549	11.411	4.41957	transport.peptides and oligopeptides	moderately similar to ( 456) AT1G22540 | Symbols: | proton-dependent oligopeptide transport (POT) family protein | chr1:7964202-7966222 FORWARDhighly similar to ( 645) loc_os05g35594 12005.m07789 protein expressed protein seq=cds; coord=6:150660495..150665214:-1; parent_gene=GRMZM2G077498	7.18961e-24	2.49115e-22
GRMZM2G126397	GRMZM2G126397_T01	3.23486	7.07178	59.1437	673.458	lipid metabolism.lipid transfer proteins etc	very weakly similar to (98.2) AT5G01870 | Symbols: | lipid transfer protein, putative | chr5:337234-337678 FORWARDvery weakly similar to (97.1) NLTP_MALDO Nonspecific lipid-transfer protein precursor (LTP) (Allergen Mal d 3) - Malus domestica (Apple) (Malus sylvestris)weakly similar to ( 153) loc_os01g60740 12001.m12202 protein nonspecific lipid-transfer protein precursor, putative, expressed seq…	4.32698e-44	4.63757e-42
GRMZM2G424205	GRMZM2G424205_T01	3.22129	1.33453	11.0505		not assigned.unknown	seq=cds; coord=7:174339610..174341979:-1; parent_gene=GRMZM2G424205	9.35782e-23	3.04237e-21
GRMZM2G023813	GRMZM2G023813_T01	3.22107	0.873665	7.24124		RNA.regulation of transcription.ARF, Auxin Response Factor family	moderately similar to ( 227) AT1G77850 | Symbols: ARF17 | ARF17 (AUXIN RESPONSE FACTOR 17); transcription factor | chr1:29272405-29275193 FORWARDmoderately similar to ( 318) loc_os04g59430 12004.m10819 protein B3 DNA binding domain containing protein, expressed seq=cds; coord=10:149197770..149199623:-1; parent_gene=GRMZM2G023813	1.0543e-13	1.65945e-12
GRMZM2G134450	GRMZM2G134450_T02	3.20879	0.41226	3.3894		transport.calcium	moderately similar to ( 224) AT5G17860 | Symbols: CAX7 | CAX7 (calcium exchanger 7); calcium:sodium antiporter/ cation:cation antiporter | chr5:5902638-5904350 REVERSEmoderately similar to ( 406) loc_os03g45370 12003.m09566 protein K-exchanger-like protein, putative, expressed seq=cds; coord=1:259022596..259024912:-1; parent_gene=GRMZM2G134450	1.55499e-09	1.55155e-08
GRMZM2G091578	GRMZM2G091578_T01	3.20701	191.79	1573.94	235.461	protein.degradation.subtilases	highly similar to ( 911) AT5G67360 | Symbols: ARA12 | ARA12; serine-type endopeptidase | chr5:26872192-26874465 REVERSEnearly identical (1226) loc_os03g55350 12003.m10450 protein subtilisin-like protease precursor, putative, expressed seq=cds; coord=1:279185068..279187876:-1; parent_gene=GRMZM2G091578	4.04024e-145	6.0114e-142
GRMZM2G475971	GRMZM2G475971_T01	3.20699	5.81155	47.6738		not assigned.unknown	weakly similar to ( 110) loc_os03g19260 12003.m07343 protein expressed protein seq=cds; coord=1:48763441..48764344:-1; parent_gene=GRMZM2G475971	4.37788e-37	3.35558e-35
GRMZM2G338465	GRMZM2G338465_T01	3.19593	0.826304	6.73823		misc.UDP glucosyl and glucoronyl transferases	moderately similar to ( 385) AT2G36800 | Symbols: DOGT1, UGT73C5 | DOGT1 (DON-GLUCOSYLTRANSFERASE 1); UDP-glycosyltransferase/ cis-zeatin O-beta-D-glucosyltransferase/ glucosyltransferase/ quercetin 4-O-glucosyltransferase/ quercetin 7-O-glucosyltransferase/ trans-zeatin O-beta-D-glucosyltransferase/ transferase, transf | chr2:15423493-15424980 REVERSEweakly similar to ( 190) CZOG_SORBI Putative …	3.03198e-13	4.59778e-12
GRMZM2G057086	GRMZM2G057086_T01	3.18743	5.91902	47.9675	1.65294	misc.cytochrome P450	highly similar to ( 515) AT5G04660 | Symbols: CYP77A4 | CYP77A4; electron carrier/ heme binding / iron ion binding / monooxygenase/ oxygen binding | chr5:1336049-1337587 FORWARDmoderately similar to ( 500) C77A3_SOYBN Cytochrome P450 77A3 (EC 1.14.-.-) - Glycine max (Soybean)highly similar to ( 724) loc_os04g33370 12004.m08433 protein cytochrome P450 77A2, putative, expressed seq=cds; coord=2:587…	2.59785e-66	6.25809e-64
GRMZM2G001332	GRMZM2G001332_T01	3.18604	2.60986	21.1239		not assigned.unknown	seq=cds; coord=6:157323581..157324439:-1; parent_gene=GRMZM2G001332	3.38026e-15	6.14668e-14
GRMZM2G015709	GRMZM2G015709_T01	3.18426	0.5887	4.75568	5.10815	misc.UDP glucosyl and glucoronyl transferases	weakly similar to ( 132) AT5G54010 | Symbols: | glycosyltransferase family protein | chr5:21919819-21921180 REVERSEmoderately similar to ( 224) UFOG_PETHY Anthocyanidin 3-O-glucosyltransferase (EC 2.4.1.115) (Flavonol 3-O-glucosyltransferase) (UDP-glucose flavonoid 3-O-glucosyltransferase) (Anthocyanin rhamnosyl transferase) - Petunia hybrida (Petunia)moderately similar to ( 307) loc_os11g26950 1…	1.76168e-10	1.97692e-09
GRMZM2G457287	GRMZM2G457287_T01	3.18397	0.874046	7.06078		not assigned.unknown	moderately similar to ( 430) AT3G13510 | Symbols: | unknown protein | chr3:4403776-4405741 FORWARDmoderately similar to ( 471) loc_os07g38590 12007.m08105 protein carboxyl-terminal peptidase, putative, expressed seq=cds; coord=4:1992637..1995216:-1; parent_gene=GRMZM2G457287	1.76168e-10	1.97692e-09
GRMZM2G493395	GRMZM2G493395_T02	3.17783	0.752861	6.06191	2.69678	secondary metabolism.isoprenoids.non-mevalonate pathway.DXS	highly similar to ( 922) AT4G15560 | Symbols: CLA1, DEF, CLA, DXS, DXPS2 | CLA1 (CLOROPLASTOS ALTERADOS 1); 1-deoxy-D-xylulose-5-phosphate synthase | chr4:8884218-8887254 FORWARDhighly similar to ( 932) DXS_ORYSA Probable 1-deoxy-D-xylulose-5-phosphate synthase, chloroplast precursor (EC 2.2.1.7) (1-deoxyxylulose-5-phosphate synthase) (DXP synthase) (DXPS) - Oryza sativa (Rice)nearly identical (1…	9.2132e-18	2.10514e-16
GRMZM5G837822	GRMZM5G837822_T01	3.1762	8.31891	66.7259		stress.biotic	moderately similar to ( 343) AT5G24090 | Symbols: | acidic endochitinase (CHIB1) | chr5:8143805-8145153 REVERSEmoderately similar to ( 376) CHLY_HEVBR Hevamine-A precursor [Includes: Chitinase (EC 3.2.1.14); Lysozyme (EC 3.2.1.17)] - Hevea brasiliensis (Para rubber tree)moderately similar to ( 466) loc_os01g64110 12001.m12526 protein hevamine-A precursor, putative, expressed seq=cds; coord=3:1765…	1.88778e-48	2.44869e-46
GRMZM2G164405	GRMZM2G164405_T01	3.15908	3.5361	28.1163		hormone metabolism.ethylene.synthesis-degradation.1-aminocyclopropane-1-carboxylate synthase	highly similar to ( 593) AT4G11280 | Symbols: ACS6 | ACS6 (1-AMINOCYCLOPROPANE-1-CARBOXYLIC ACID (ACC) SYNTHASE 6); 1-aminocyclopropane-1-carboxylate synthase | chr4:6864168-6865922 FORWARDhighly similar to ( 603) 1A1C_SOYBN 1-aminocyclopropane-1-carboxylate synthase (EC 4.4.1.14) (ACC synthase) (S-adenosyl-L-methionine methylthioadenosine-lyase) - Glycine max (Soybean)highly similar to ( 798) lo…	1.60893e-44	1.76174e-42
GRMZM2G036262	GRMZM2G036262_T01	3.14495	3.0723	24.1948	101.787	not assigned.unknown	seq=cds; coord=2:6458506..6459190:1; parent_gene=GRMZM2G036262	9.30477e-15	1.6235e-13
GRMZM2G369839	GRMZM2G369839_T01	3.14296	190.042	1492.12	48.4881	not assigned.unknown	seq=cds; coord=3:225780411..225781334:-1; parent_gene=GRMZM2G369839	7.88413e-135	9.0646e-132
GRMZM2G449817	GRMZM2G449817_T01	3.13698	0.304983	2.38511	3.13885	signalling.receptor kinases.leucine rich repeat XI	highly similar to ( 801) AT5G25930 | Symbols: | leucine-rich repeat family protein / protein kinase family protein | chr5:9050880-9053978 FORWARDmoderately similar to ( 405) RPK1_IPONI Receptor-like protein kinase precursor (EC 2.7.11.1) - Ipomoea nil (Japanese morning glory) (Pharbitis nil)nearly identical (1387) loc_os06g36270 12006.m091721 protein receptor-like protein kinase 5 precursor, puta…	4.7086e-09	4.42091e-08
GRMZM2G164074	GRMZM2G164074_T01	3.13095	1.39521	10.867		misc.cytochrome P450	highly similar to ( 521) AT3G48520 | Symbols: CYP94B3 | CYP94B3; electron carrier/ heme binding / iron ion binding / monooxygenase/ oxygen binding | chr3:17975104-17976624 REVERSEhighly similar to ( 666) loc_os11g29290 12011.m06839 protein cytochrome P450 86A2, putative, expressed seq=cds; coord=2:123595685..123597852:-1; parent_gene=GRMZM2G164074	1.31382e-22	4.21723e-21
GRMZM2G378770	GRMZM2G378770_T01	3.11739	6.50686	50.1038	13.8327	protein.synthesis.ribosomal protein.eukaryotic.60S subunit.P3	very weakly similar to (85.9) AT4G25890 | Symbols: | 60S acidic ribosomal protein P3 (RPP3A) | chr4:13159627-13160393 REVERSEweakly similar to ( 108) RLA3_MAIZE 60S acidic ribosomal protein P3 (P1/P2-like) (P3A) - Zea mays (Maize)very weakly similar to (92.4) loc_os06g48780 12006.m09404 protein 60S acidic ribosomal protein P3, putative, expressed seq=cds; coord=6:86625400..86626261:1; parent_gene…	4.41597e-32	2.56428e-30
GRMZM5G893444	GRMZM5G893444_T01	3.10266	14.5819	111.417	20.8961	transport.peptides and oligopeptides	highly similar to ( 941) AT1G65730 | Symbols: YSL7 | YSL7 (YELLOW STRIPE LIKE 7); oligopeptide transporter | chr1:24442639-24446122 FORWARDnearly identical (1092) loc_os02g42220 12002.m09259 protein transposon protein, putative, unclassified, expressed seq=cds; coord=10:131888157..131892103:-1; parent_gene=GRMZM5G893444	6.80863e-94	3.74386e-91
GRMZM2G139815	GRMZM2G139815_T01	3.09998	0.988827	7.5348	6.11726	RNA.regulation of transcription.WRKY domain transcription factor family	very weakly similar to (94.0) AT4G23810 | Symbols: WRKY53, ATWRKY53 | WRKY53; DNA binding / protein binding / transcription activator/ transcription factor | chr4:12392666-12393739 REVERSEweakly similar to ( 200) loc_os09g16510 12009.m04911 protein OsWRKY74 - Superfamily of rice TFs having WRKY and zinc finger domains, expressed seq=cds; coord=7:92391794..92393825:1; parent_gene=GRMZM2G139815	2.50814e-12	3.4348e-11
GRMZM2G084979	GRMZM2G084979_T01	3.09647	17.832	135.584		development.unspecified	very weakly similar to (86.7) AT2G35980 | Symbols: YLS9, NHL10, ATNHL10 | YLS9 (YELLOW-LEAF-SPECIFIC GENE 9) | chr2:15110635-15111318 FORWARDweakly similar to ( 166) loc_os01g64470 12001.m12561 protein YLS9, putative, expressed seq=cds; coord=8:166617400..166618265:1; parent_gene=GRMZM2G084979	1.16096e-65	2.69407e-63
GRMZM2G083855	GRMZM2G083855_T01	3.08028	23.5021	176.79	3.10325	not assigned.unknown	weakly similar to ( 118) loc_os02g37180 12002.m08806 protein expressed protein seq=cds; coord=5:178476001..178476910:1; parent_gene=GRMZM2G083855	1.96888e-70	5.53343e-68
GRMZM2G396541	GRMZM2G396541_T01	3.07905	3.79986	28.5343	4.90781	not assigned.unknown	seq=cds; coord=8:8616933..8618147:1; parent_gene=GRMZM2G396541	1.95804e-30	1.04048e-28
GRMZM5G828488	GRMZM5G828488_T01	3.07351	4.10761	30.7007	36.7938	stress.abiotic	moderately similar to ( 231) AT2G45130 | Symbols: ATSPX3, SPX3 | SPX3 (SPX DOMAIN GENE 3) | chr2:18606489-18607754 FORWARDmoderately similar to ( 325) loc_os03g29250 12003.m08200 protein ids4-like protein, putative, expressed seq=cds; coord=1:70564125..70565403:1; parent_gene=GRMZM5G828488	8.20414e-33	4.9058e-31
GRMZM2G392106	GRMZM2G392106_T01	3.06939	0.754508	5.62826		not assigned.unknown	seq=cds; coord=2:109490900..109491954:1; parent_gene=GRMZM2G392106	6.66721e-07	4.54067e-06
GRMZM2G159908	GRMZM2G159908_T02	3.06849	0.453565	3.38337		signalling.receptor kinases.wall associated kinase	weakly similar to ( 171) AT3G55950 | Symbols: CCR3, ATCRR3 | CCR3 (ARABIDOPSIS THALIANA CRINKLY4 RELATED 3); kinase | chr3:20753903-20756347 REVERSEweakly similar to ( 131) CRI4_MAIZE Putative receptor protein kinase CRINKLY4 precursor (EC 2.7.11.1) - Zea mays (Maize)moderately similar to ( 321) loc_os11g44500 12011.m08283 protein ATP binding protein, putative, expressed seq=cds; coord=3:22930906…	6.66721e-07	4.54067e-06
GRMZM2G076972	GRMZM2G076972_T01	3.05201	16.6744	122.998	26.3245	not assigned.unknown	very weakly similar to (82.4) loc_os06g05440 12006.m05272 protein expressed protein seq=cds; coord=9:19805157..19805958:1; parent_gene=GRMZM2G076972	5.27713e-59	9.26943e-57
GRMZM5G879872	GRMZM5G879872_T02	3.04604	1.91809	14.0772		not assigned.unknown	very weakly similar to (88.2) loc_os02g57350 12002.m10757 protein expressed protein seq=cds; coord=5:215843845..215844674:1; parent_gene=GRMZM5G879872	1.51178e-12	2.11968e-11
GRMZM2G123119	GRMZM2G123119_T01	3.04457	1.75297	12.8462	1.93588	RNA.regulation of transcription.AP2/EREBP, APETALA2/Ethylene-responsive element binding protein family	weakly similar to ( 112) AT1G06160 | Symbols: ORA59 | ORA59 (OCTADECANOID-RESPONSIVE ARABIDOPSIS AP2/ERF 59); DNA binding / transcription activator/ transcription factor | chr1:1883046-1883780 FORWARDvery weakly similar to (93.2) ERF5_TOBAC Ethylene-responsive transcription factor 5 (Ethylene-responsive element-binding factor 5 homolog) (EREBP-4) (NtERF4) - Nicotiana tabacum (Common tobacco)weakl…	1.94198e-13	2.99332e-12
GRMZM2G337048	GRMZM2G337048_T01	3.0444	0.897414	6.5863	3.45217	misc.UDP glucosyl and glucoronyl transferases	highly similar to ( 521) AT2G36970 | Symbols: | UDP-glucoronosyl/UDP-glucosyl transferase family protein | chr2:15529050-15530712 FORWARDmoderately similar to ( 222) IAAG_MAIZE Indole-3-acetate beta-glucosyltransferase (EC 2.4.1.121) (IAA-Glu synthetase) ((Uridine 5-diphosphate-glucose:indol-3-ylacetyl)-beta-D-glucosyl transferase) - Zea mays (Maize)highly similar to ( 791) loc_os10g30560 12010.m…	1.51178e-12	2.11968e-11
GRMZM2G452896	GRMZM2G452896_T01	3.03107	2.08925	15.1826	2.03039	protein.degradation	highly similar to ( 583) AT2G24280 | Symbols: | serine carboxypeptidase S28 family protein | chr2:10334622-10336927 FORWARDhighly similar to ( 728) loc_os06g43930 12006.m32127 protein lysosomal Pro-X carboxypeptidase precursor, putative, expressed seq=cds; coord=9:102932336..102935717:-1; parent_gene=GRMZM2G452896	3.63531e-26	1.46965e-24
GRMZM2G095280	GRMZM2G095280_T01	3.02358	16.5926	120.095	5.65791	misc.UDP glucosyl and glucoronyl transferases	moderately similar to ( 335) AT1G05680 | Symbols: | UDP-glucoronosyl/UDP-glucosyl transferase family protein | chr1:1703196-1704639 REVERSEmoderately similar to ( 325) IAAG_MAIZE Indole-3-acetate beta-glucosyltransferase (EC 2.4.1.121) (IAA-Glu synthetase) ((Uridine 5-diphosphate-glucose:indol-3-ylacetyl)-beta-D-glucosyl transferase) - Zea mays (Maize)highly similar to ( 676) loc_os04g12970 12004…	2.55751e-83	1.07998e-80
GRMZM2G112538	GRMZM2G112538_T01	3.02122	0.869002	6.27323		stress.biotic	weakly similar to ( 167) PR1_ASPOF Pathogenesis-related protein 1 (AOPR1) - Asparagus officinalis (Garden asparagus)moderately similar to ( 280) loc_os03g18850 12003.m07305 protein pathogenesis-related protein 1, putative, expressed seq=cds; coord=1:47149321..47150335:1; parent_gene=GRMZM2G112538	1.15002e-06	7.49126e-06
GRMZM2G145950	GRMZM2G145950_T01	3.0199	0.572323	4.13154	6.17997	not assigned.unknown	very weakly similar to (98.6) loc_os03g56700 12003.m10580 protein expressed protein seq=cds; coord=1:276533510..276535247:-1; parent_gene=GRMZM2G145950	4.29047e-08	3.53957e-07
GRMZM2G328500	GRMZM2G328500_T02	3.01461	16.6711	119.714	10.0346	cell wall.precursor synthesis.UGD	highly similar to ( 885) AT3G29360 | Symbols: | UDP-glucose 6-dehydrogenase, putative | chr3:11267375-11268817 REVERSEhighly similar to ( 895) UGDH_SOYBN UDP-glucose 6-dehydrogenase (EC 1.1.1.22) (UDP-Glc dehydrogenase) (UDP-GlcDH) (UDPGDH) - Glycine max (Soybean)highly similar to ( 934) loc_os12g25690 12012.m06393 protein UDP-glucose 6-dehydrogenase, putative, expressed seq=cds; coord=1:27812940…	2.9778e-87	1.39483e-84
GRMZM2G178817	GRMZM2G178817_T01	3.00969	6.63338	47.4963		stress.abiotic.unspecified	moderately similar to ( 228) AT5G39110 | Symbols: | germin-like protein, putative | chr5:15657802-15658584 REVERSEweakly similar to ( 184) RHRE_PEA Rhicadhesin receptor precursor (Germin-like protein) - Pisum sativum (Garden pea)moderately similar to ( 358) loc_os12g05860 12012.m04577 protein germin-like protein subfamily 1 member 8 precursor, putative, expressed seq=cds; coord=10:58452597..58453…	1.89849e-36	1.40822e-34
GRMZM2G180080	GRMZM2G180080_T01	3.00658	3.68871	26.4266	3.3098	protein.degradation.AAA type	moderately similar to ( 333) AT3G50930 | Symbols: BCS1 | BCS1 (CYTOCHROME BC1 SYNTHESIS); ATP binding / ATPase/ nucleoside-triphosphatase/ nucleotide binding | chr3:18929817-18931547 FORWARDhighly similar to ( 597) loc_os03g38800 12003.m08973 protein mitochondrial protein, putative, expressed seq=cds; coord=7:153445379..153447277:-1; parent_gene=GRMZM2G180080	2.1174e-38	1.72766e-36
GRMZM2G022679	GRMZM2G022679_T01	2.99482	2.73437	19.3736	3.28065	hormone metabolism.gibberelin.synthesis-degradation.GA2 oxidase	moderately similar to ( 314) AT1G78440 | Symbols: ATGA2OX1 | ATGA2OX1 (gibberellin 2-oxidase 1); gibberellin 2-beta-dioxygenase | chr1:29511772-29512990 REVERSEmoderately similar to ( 329) G2OX1_PEA Gibberellin 2-beta-dioxygenase 1 (EC 1.14.11.13) (Gibberellin 2-beta-hydroxylase 1) (Gibberellin 2-oxidase 1) (GA 2-oxidase 1) (Protein SLENDER) - Pisum sativum (Garden pea)highly similar to ( 520) lo…	1.37447e-26	5.70869e-25
GRMZM2G172751	GRMZM2G172751_T01	2.99461	1.84403	13.0843	1.38809	not assigned.unknown	highly similar to ( 892) AT2G33420 | Symbols: | FUNCTIONS IN: molecular_function unknown; INVOLVED IN: biological_process unknown; LOCATED IN: cellular_component unknown; EXPRESSED IN: 9 plant structures; EXPRESSED DURING: L mature pollen stage, M germinated pollen stage, 4 anthesis, C globular stage, petal differentiation and expansion stage; CONTAINS InterPro DOMAIN/s: Munc13 homology 1 (InterP…	4.64659e-35	3.18512e-33
GRMZM2G141320	GRMZM2G141320_T01	2.99378	0.822509	5.82764	12.4896	lipid metabolism.glycolipid synthesis.MGDG synthase	highly similar to ( 528) AT5G20410 | Symbols: MGD2, ATMGD2 | MGD2; 1,2-diacylglycerol 3-beta-galactosyltransferase/ UDP-galactosyltransferase/ transferase, transferring glycosyl groups | chr5:6896765-6898581 FORWARDhighly similar to ( 642) loc_os08g20420 12008.m26650 protein MGD2, putative, expressed seq=cds; coord=1:187667515..187670309:-1; parent_gene=GRMZM2G141320	3.51135e-11	4.26385e-10
GRMZM2G389903	GRMZM2G389903_T01	2.98637	1.9724	13.8995		not assigned.unknown	seq=cds; coord=6:157043933..157044497:1; parent_gene=GRMZM2G389903	7.64422e-09	7.02846e-08
GRMZM2G361388	GRMZM2G361388_T01	2.98616	1.2206	8.60158	2.47127	not assigned.unknown	very weakly similar to (86.7) AT1G80520 | Symbols: | FUNCTIONS IN: molecular_function unknown; INVOLVED IN: biological_process unknown; LOCATED IN: cellular_component unknown; EXPRESSED IN: 16 plant structures; EXPRESSED DURING: 4 anthesis, C globular stage, 4 leaf senescence stage, petal differentiation and expansion stage, D bilateral stage; CONTAINS InterPro DOMAIN/s: Sterile alpha motif homol…	7.64422e-09	7.02846e-08
GRMZM2G050108	GRMZM2G050108_T01	2.98586	0.560286	3.94834	1.37745	metal handling.binding, chelation and storage	moderately similar to ( 247) AT1G56430 | Symbols: ATNAS4, NAS4 | NAS4 (NICOTIANAMINE SYNTHASE 4); nicotianamine synthase | chr1:21137023-21137997 FORWARDmoderately similar to ( 435) NAS9_HORVU Nicotianamine synthase 9 (EC 2.5.1.43) (S-adenosyl-L-methionine:S-adenosyl-L-methionine:S-adenosyl-methionine 3-amino-3-carboxypropyltransferase 9) - Hordeum vulgare (Barley)moderately similar to ( 422) loc…	7.64422e-09	7.02846e-08
GRMZM2G102059	GRMZM2G102059_T01	2.98443	1.63563	11.5263	2.83847	RNA.regulation of transcription.ABI3/VP1-related B3-domain-containing transcription factor family	weakly similar to ( 193) AT2G46870 | Symbols: NGA1 | NGA1 (NGATHA1); transcription factor | chr2:19261313-19262245 FORWARDmoderately similar to ( 338) loc_os02g45850 12002.m09622 protein B3 DNA binding domain containing protein, expressed seq=cds; coord=2:15022549..15024592:1; parent_gene=GRMZM2G102059	2.35238e-21	6.94295e-20
GRMZM2G070255	GRMZM2G070255_T01	2.96675	4.18606	29.117	18.2747	not assigned.unknown	weakly similar to ( 143) AT5G16250 | Symbols: | unknown protein | chr5:5310264-5310815 REVERSEmoderately similar to ( 296) loc_os04g41900 12004.m09164 protein expressed protein seq=cds; coord=10:127614675..127615891:-1; parent_gene=GRMZM2G070255	1.65939e-29	8.44521e-28
GRMZM2G021687	GRMZM2G021687_T01	2.95943	1.50013	10.378	9.68111	protein.folding	weakly similar to ( 177) AT2G34860 | Symbols: EDA3 | EDA3 (embryo sac development arrest 3); heat shock protein binding / unfolded protein binding | chr2:14708380-14709804 FORWARDmoderately similar to ( 240) loc_os08g36140 12008.m07603 protein expressed protein seq=cds; coord=1:197846348..197848301:1; parent_gene=GRMZM2G021687	2.35617e-09	2.30817e-08
GRMZM2G124409	GRMZM2G124409_T01	2.95192	2.91626	20.0952	21.6046	not assigned.unknown	seq=cds; coord=9:124643027..124644435:1; parent_gene=GRMZM2G124409	6.23566e-22	1.91646e-20
GRMZM2G336337	GRMZM2G336337_T01	2.94942	0.542819	3.73195		secondary metabolism.simple phenols	highly similar to ( 769) AT5G05390 | Symbols: LAC12 | LAC12 (laccase 12); laccase | chr5:1594753-1597042 FORWARDmoderately similar to ( 214) ASO_CUCSA L-ascorbate oxidase precursor (EC 1.10.3.3) (Ascorbase) (ASO) - Cucumis sativus (Cucumber)highly similar to ( 974) loc_os01g61160 12001.m12243 protein L-ascorbate oxidase precursor, putative, expressed seq=cds; coord=8:170035152..170037679:-1; pare…	1.30694e-08	1.16895e-07
GRMZM2G425072	GRMZM2G425072_T01	2.94565	1.77802	12.1771		hormone metabolism.auxin.induced-regulated-responsive-activated	seq=cds; coord=10:133269606..133270769:1; parent_gene=GRMZM2G425072	6.69893e-14	1.08132e-12
GRMZM2G308615	GRMZM2G308615_T01	2.94372	5.29339	36.2897	3.63979	protein.postranslational modification	moderately similar to ( 260) AT3G11410 | Symbols: ATPP2CA, AHG3, PP2CA | PP2CA (ARABIDOPSIS THALIANA PROTEIN PHOSPHATASE 2CA); protein binding / protein serine/threonine phosphatase | chr3:3584181-3585649 REVERSEmoderately similar to ( 354) loc_os09g15670 12009.m04828 protein protein phosphatase 2C, putative, expressed seq=cds; coord=7:89034033..89035626:-1; parent_gene=GRMZM2G308615	7.96757e-41	7.27551e-39
AC197705.4	AC197705.4_FGT001	2.9409	16.3551	111.681	2.3778	fermentation.PDC	highly similar to ( 937) AT4G33070 | Symbols: | pyruvate decarboxylase, putative | chr4:15952519-15954676 REVERSEnearly identical (1157) PDC1_MAIZE Pyruvate decarboxylase isozyme 1 (EC 4.1.1.1) (PDC) - Zea mays (Maize)nearly identical (1097) loc_os05g39310 12005.m08110 protein pyruvate decarboxylase isozyme 1, putative, expressed seq=cds; coord=8:118165588..118167724:1; parent_gene=AC197705.4_FG0…	3.31567e-78	1.21546e-75
GRMZM2G145313	GRMZM2G145313_T01	2.93922	1.19625	8.15585		not assigned.unknown	weakly similar to ( 170) AT5G51670 | Symbols: | unknown protein | chr5:20993560-20995096 FORWARDhighly similar to ( 603) loc_os03g16390 12003.m07074 protein expressed protein seq=cds; coord=9:140014798..140016394:1; parent_gene=GRMZM2G145313	5.09753e-13	7.52696e-12
GRMZM2G041636	GRMZM2G041636_T01	2.93868	0.975697	6.65214	4.60933	RNA.regulation of transcription.bHLH,Basic Helix-Loop-Helix family	very weakly similar to (80.5) loc_os03g19780 12003.m07393 protein expressed protein seq=cds; coord=7:174327890..174328868:-1; parent_gene=GRMZM2G041636	1.28946e-07	9.8596e-07
GRMZM2G339122	GRMZM2G339122_T01	2.93783	4.95459	33.7421	33.4059	cell wall.modification	moderately similar to ( 355) AT1G69530 | Symbols: ATEXPA1, EXP1, AT-EXP1, ATEXP1, ATHEXP ALPHA 1.2 | ATEXPA1 (ARABIDOPSIS THALIANA EXPANSIN A1) | chr1:26142034-26143200 FORWARDmoderately similar to ( 420) EXPA2_ORYSA Expansin-A2 precursor (OsEXPA2) (Alpha-expansin-2) (OsEXP2) (OsaEXPa1.23) (RiExB) (RiExC) - Oryza sativa (Rice)moderately similar to ( 420) loc_os01g60770 12001.m12205 protein alpha-…	1.5227e-40	1.36579e-38
GRMZM2G075988	GRMZM2G075988_T01	2.93296	3.86169	26.2284	5.92693	not assigned.unknown	weakly similar to ( 106) loc_os07g48150 12007.m09029 protein plant-specific domain TIGR01568 family protein, expressed seq=cds; coord=1:56306536..56307813:-1; parent_gene=GRMZM2G075988	5.16378e-28	2.45052e-26
GRMZM2G164912	GRMZM2G164912_T01	2.92485	3.17556	21.3957	15.7162	not assigned.unknown	highly similar to ( 599) AT2G33570 | Symbols: | unknown protein | chr2:14217361-14219043 FORWARDhighly similar to ( 878) loc_os02g48190 12002.m09853 protein expressed protein seq=cds; coord=5:202286047..202289158:-1; parent_gene=GRMZM2G164912	2.45542e-36	1.80545e-34
GRMZM2G400718	GRMZM2G400718_T01	2.91919	8.33982	56.0831	25.0261	not assigned.unknown	very weakly similar to (95.5) AT4G28310 | Symbols: | unknown protein | chr4:14017458-14018066 FORWARDweakly similar to ( 163) loc_os06g02530 12006.m04986 protein expressed protein seq=cds; coord=6:60182469..60183781:-1; parent_gene=GRMZM2G400718	1.30594e-41	1.23717e-39
GRMZM2G088783	GRMZM2G088783_T01	2.91902	1.4225	9.55573	3.12004	RNA.regulation of transcription.MYB domain transcription factor family	moderately similar to ( 233) AT3G13890 | Symbols: MYB26 | ATMYB26 (MYB DOMAIN PROTEIN 26); DNA binding / transcription factor | chr3:4576744-4578027 REVERSEweakly similar to ( 190) MYB3_HORVU Myb-related protein Hv33 - Hordeum vulgare (Barley)moderately similar to ( 310) loc_os01g51260 12001.m11307 protein MYB9, putative, expressed seq=cds; coord=3:204151795..204153806:-1; parent_gene=GRMZM2G0887…	8.37146e-13	1.20792e-11
GRMZM2G003426	GRMZM2G003426_T01	2.91434	1.33783	8.96778		not assigned.unknown	very weakly similar to (83.6) loc_os08g32120 12008.m07206 protein expressed protein seq=cds; coord=1:218800498..218801330:-1; parent_gene=GRMZM2G003426	2.23277e-08	1.92145e-07
GRMZM2G099420	GRMZM2G099420_T01	2.90687	6.98547	46.4962	1.48274	secondary metabolism.flavonoids.dihydroflavonols	moderately similar to ( 323) AT1G15950 | Symbols: CCR1, IRX4, ATCCR1 | CCR1 (CINNAMOYL COA REDUCTASE 1); cinnamoyl-CoA reductase | chr1:5478855-5481949 FORWARDweakly similar to ( 171) DFRA_MAIZE Dihydroflavonol-4-reductase (EC 1.1.1.219) (DFR) (Dihydrokaempferol 4-reductase) - Zea mays (Maize)highly similar to ( 513) loc_os02g56460 12002.m10668 protein dihydroflavonol-4-reductase, putative, expre…	7.96936e-44	8.36419e-42
GRMZM2G149636	GRMZM2G149636_T01	2.90308	33.0892	219.695	2.61579	lipid metabolism.FA synthesis and FA elongation.beta ketoacyl CoA synthase	highly similar to ( 627) AT1G01120 | Symbols: KCS1 | KCS1 (3-KETOACYL-COA SYNTHASE 1); acyltransferase/ fatty acid elongase | chr1:57392-58978 REVERSEhighly similar to ( 930) loc_os03g14170 12003.m06860 protein senescence-associated protein 15, putative, expressed seq=cds; coord=1:33422637..33424854:-1; parent_gene=GRMZM2G149636	2.61669e-98	1.57587e-95
AC234515.1	AC234515.1_FGT003	2.90059	7.39361	49.0693	162.611	cell.organisation	highly similar to ( 804) AT5G23860 | Symbols: TUB8 | TUB8; structural constituent of cytoskeleton | chr5:8042962-8044528 FORWARDhighly similar to ( 821) TBB5_ORYSA Tubulin beta-5 chain (Beta-5 tubulin) - Oryza sativa (Rice)highly similar to ( 821) loc_os06g46000 12006.m31916 protein tubulin beta-3 chain, putative, expressed seq=cds; coord=5:83557023..83560095:1; parent_gene=AC234515.1_FG003	1.46164e-43	1.50901e-41
GRMZM2G115070	GRMZM2G115070_T01	2.88186	4.41735	28.9121	1.07322	RNA.regulation of transcription.MYB-related transcription factor family	very weakly similar to ( 100) AT3G09600 | Symbols: | myb family transcription factor | chr3:2946459-2948200 FORWARDweakly similar to ( 126) loc_os05g07010 12005.m05227 protein myb-like DNA-binding domain containing protein, expressed seq=cds; coord=1:300799980..300800880:1; parent_gene=GRMZM2G115070	5.27255e-23	1.73651e-21
GRMZM2G084779	GRMZM2G084779_T01	2.88102	6.16973	40.4294		transport.potassium	highly similar to ( 853) AT4G13420 | Symbols: HAK5, ATHAK5 | HAK5 (HIGH AFFINITY K+ TRANSPORTER 5); potassium ion transmembrane transporter/ potassium:sodium symporter | chr4:7797038-7802174 REVERSEhighly similar to ( 855) HAK1_ORYSA Potassium transporter 1 (OsHAK1) - Oryza sativa (Rice)nearly identical (1221) loc_os01g70490 12001.m13096 protein potassium transporter 5, putative, expressed seq=cd…	8.46471e-60	1.54033e-57
GRMZM2G330848	GRMZM2G330848_T01	2.87222	1.38436	9.02193		hormone metabolism.abscisic acid.synthesis-degradation.synthesis.9-cis-epoxycarotenoid dioxygenase	moderately similar to ( 382) AT3G14440 | Symbols: NCED3, ATNCED3, STO1, SIS7 | NCED3 (NINE-CIS-EPOXYCAROTENOID DIOXYGENASE 3); 9-cis-epoxycarotenoid dioxygenase | chr3:4831678-4833477 REVERSEmoderately similar to ( 447) loc_os07g05940 12007.m05058 protein viviparous-14, putative, expressed seq=cds; coord=7:175861745..175863458:-1; parent_gene=GRMZM2G330848	2.25626e-12	3.10499e-11
GRMZM2G060712	GRMZM2G060712_T01	2.86089	7.44801	48.1657	1.88494	not assigned.unknown	very weakly similar to (94.7) loc_os04g39360 12004.m08925 protein ATFP4, putative, expressed seq=cds; coord=2:39895690..39896162:1; parent_gene=GRMZM2G060712	2.08447e-15	3.89111e-14
GRMZM2G034623	GRMZM2G034623_T01	2.85874	2.00827	12.9599	3.51156	not assigned.unknown	very weakly similar to (84.3) AT5G41761 | Symbols: | unknown protein | chr5:16711437-16711742 FORWARDweakly similar to ( 144) loc_os06g33200 12006.m07857 protein expressed protein seq=cds; coord=9:69569540..69570411:1; parent_gene=GRMZM2G034623	1.83736e-11	2.30299e-10
GRMZM2G142584	GRMZM2G142584_T01	2.84978	0.380864	2.44392		misc.oxidases - copper, flavone etc.	highly similar to ( 684) AT3G13390 | Symbols: sks11 | sks11 (SKU5 Similar 11); copper ion binding / oxidoreductase | chr3:4351401-4353289 REVERSEhighly similar to ( 686) NTP3_TOBAC Pollen-specific protein NTP303 precursor - Nicotiana tabacum (Common tobacco)highly similar to ( 927) loc_os05g40740 12005.m083761 protein pollen-specific protein NTP303 precursor, putative, expressed seq=cds; coord=8:…	3.86015e-07	2.73345e-06
GRMZM2G099467	GRMZM2G099467_T01	2.84624	29.241	187.041	1.49501	secondary metabolism.flavonoids.dihydroflavonols	moderately similar to ( 424) AT5G24530 | Symbols: DMR6 | DMR6 (DOWNY MILDEW RESISTANT 6); oxidoreductase/ oxidoreductase, acting on paired donors, with incorporation or reduction of molecular oxygen, 2-oxoglutarate as one donor, and incorporation of one atom each of oxygen into both donors | chr5:8378964-8383154 FORWARDweakly similar to ( 200) FLS_PETHY Flavonol synthase/flavanone 3-hydroxylase (…	8.29767e-85	3.68213e-82
GRMZM2G003530	GRMZM2G003530_T01	2.84005	2.19441	13.9675	5.58943	not assigned.unknown	moderately similar to ( 412) AT2G15730 | Symbols: | unknown protein | chr2:6849797-6851881 FORWARDhighly similar to ( 571) loc_os03g27760 12003.m08100 protein expressed protein seq=cds; coord=1:68435670..68439997:-1; parent_gene=GRMZM2G003530	6.41957e-26	2.5411e-24
GRMZM2G077002	GRMZM2G077002_T01	2.83942	4.71346	30.0171	32.3311	RNA.regulation of transcription.C2C2(Zn) GATA transcription factor family	weakly similar to ( 175) AT4G17570 | Symbols: | zinc finger (GATA type) family protein | chr4:9784329-9786974 REVERSEmoderately similar to ( 459) loc_os04g46020 12004.m35399 protein GATA transcription factor 29, putative, expressed seq=cds; coord=2:21398564..21402338:-1; parent_gene=GRMZM2G077002	1.18931e-39	1.02321e-37
GRMZM2G117865	GRMZM2G117865_T01	2.83856	0.637898	4.05671	1.75276	signalling.receptor kinases.DUF 26	moderately similar to ( 217) AT1G61610 | Symbols: | S-locus lectin protein kinase family protein | chr1:22733472-22736509 FORWARDmoderately similar to ( 203) SLSG3_BRAOL S-locus-specific glycoprotein S13 precursor (SLSG-13) (Fragment) - Brassica oleracea (Wild cabbage)moderately similar to ( 480) loc_os09g37834 12009.m06731 protein serine/threonine-protein kinase receptor precursor, putative, exp…	1.10716e-07	8.5536e-07
GRMZM2G033175	GRMZM2G033175_T01	2.82441	2.07122	13.0263		not assigned.unknown	weakly similar to ( 106) AT5G37840 | Symbols: | FUNCTIONS IN: molecular_function unknown; INVOLVED IN: biological_process unknown; LOCATED IN: cellular_component unknown; BEST Arabidopsis thaliana protein match is: PMI2 (plastid movement impaired 2) (TAIR:AT1G66480.1); Has 49 Blast hits to 49 proteins in 8 species: Archae - 0; Bacteria - 0; Metazoa - 0; Fungi - 0; Plants - 49; Viruses - 0; Other …	8.17613e-20	2.18151e-18
GRMZM2G424577	GRMZM2G424577_T01	2.81592	7.11406	44.647	74.5472	not assigned.unknown	moderately similar to ( 361) AT5G19290 | Symbols: | esterase/lipase/thioesterase family protein | chr5:6494113-6495105 FORWARDmoderately similar to ( 493) loc_os01g21560 12001.m08640 protein monoglyceride lipase, putative, expressed seq=cds; coord=3:57672766..57674421:1; parent_gene=GRMZM2G424577	3.40745e-45	3.84768e-43
GRMZM2G107228	GRMZM2G107228_T01	2.81108	1.58409	9.88684	1.30293	misc.peroxidases	moderately similar to ( 250) AT5G05340 | Symbols: | peroxidase, putative | chr5:1579142-1580819 REVERSEmoderately similar to ( 251) PER2_ORYSA Peroxidase 2 precursor (EC 1.11.1.7) - Oryza sativa (Rice)highly similar to ( 502) loc_os01g22336 12001.m08715 protein peroxidase 1 precursor, putative, expressed seq=cds; coord=3:59325157..59327502:1; parent_gene=GRMZM2G107228	8.58488e-15	1.50691e-13
GRMZM2G154578	GRMZM2G154578_T01	2.81092	19.6199	122.299		hormone metabolism.auxin.induced-regulated-responsive-activated	very weakly similar to (82.4) AT3G07390 | Symbols: AIR12 | AIR12; extracellular matrix structural constituent | chr3:2365452-2366273 FORWARDweakly similar to ( 171) loc_os08g41290 12008.m08107 protein AIR12, putative, expressed seq=cds; coord=4:42919325..42920272:1; parent_gene=GRMZM2G154578	1.1092e-54	1.69012e-52
GRMZM2G113682	GRMZM2G113682_T01	2.8079	2.12638	13.2367	6.17694	not assigned.unknown	moderately similar to ( 348) AT5G17640 | Symbols: | unknown protein | chr5:5811047-5812429 REVERSEhighly similar to ( 506) loc_os08g06640 12008.m04804 protein expressed protein seq=cds; coord=10:75145548..75147356:-1; parent_gene=GRMZM2G113682	5.29582e-20	1.42503e-18
GRMZM2G152028	GRMZM2G152028_T01	2.80458	1.57973	9.81999	8.61781	not assigned.unknown	weakly similar to ( 106) AT2G37960 | Symbols: | unknown protein | chr2:15886962-15889180 REVERSE seq=cds; coord=7:304761..307032:1; parent_gene=GRMZM2G152028	4.55822e-16	9.08555e-15
GRMZM2G009940	GRMZM2G009940_T01	2.80454	0.610746	3.79656	1.64872	misc.short chain dehydrogenase/reductase (SDR)	moderately similar to ( 409) AT4G11410 | Symbols: | short-chain dehydrogenase/reductase (SDR) family protein | chr4:6945127-6947186 REVERSEweakly similar to ( 120) POR_PEA Protochlorophyllide reductase, chloroplast precursor (EC 1.3.1.33) (PCR) (NADPH-protochlorophyllide oxidoreductase) (POR) - Pisum sativum (Garden pea)highly similar to ( 517) loc_os09g39670 12009.m06905 protein retinol dehydrog…	6.66721e-07	4.54067e-06
GRMZM2G036288	GRMZM2G036288_T01	2.80131	2.0152	12.496		not assigned.unknown	seq=cds; coord=9:150315918..150316944:1; parent_gene=GRMZM2G036288	3.29259e-12	4.45839e-11
GRMZM2G009166	GRMZM2G009166_T01	2.80122	1.12909	6.99606		signalling.receptor kinases.DUF 26	highly similar to ( 627) AT5G35370 | Symbols: | ATP binding / carbohydrate binding / kinase/ protein kinase/ protein serine/threonine kinase/ protein tyrosine kinase/ sugar binding | chr5:13588564-13591182 REVERSEweakly similar to ( 196) KPRO_MAIZE Putative receptor protein kinase ZmPK1 precursor (EC 2.7.11.1) - Zea mays (Maize)nearly identical (1115) loc_os09g28180 12009.m05969 protein D-mannose…	1.13866e-17	2.56696e-16
GRMZM2G084445	GRMZM2G084445_T01	2.79483	5.29176	32.6971	17.8867	not assigned.unknown	weakly similar to ( 139) loc_os02g52490 12002.m10280 protein expressed protein seq=cds; coord=4:178735368..178737235:1; parent_gene=GRMZM2G084445	7.94731e-39	6.65627e-37
GRMZM2G358791	GRMZM2G358791_T01	2.79231	1.23472	7.61342		transport.misc	highly similar to ( 563) AT5G50300 | Symbols: | xanthine/uracil/vitamin C permease family protein | chr5:20466492-20468084 REVERSEhighly similar to ( 790) loc_os11g24060 12011.m06332 protein transmembrane transport protein-like, putative, expressed seq=cds; coord=4:10019437..10021499:1; parent_gene=GRMZM2G358791	1.37583e-14	2.36737e-13
GRMZM2G050997	GRMZM2G050997_T01	2.78964	0.627051	3.856		hormone metabolism.cytokinin.synthesis-degradation	highly similar to ( 652) AT2G41510 | Symbols: ATCKX1, CKX1 | CKX1 (CYTOKININ OXIDASE/DEHYDROGENASE 1); cytokinin dehydrogenase | chr2:17314626-17316861 FORWARDmoderately similar to ( 404) CKX1_MAIZE Cytokinin dehydrogenase 1 precursor (EC 1.5.99.12) (Cytokinin oxidase 1) (CKO 1) (COX 1) (ZmCKX1) - Zea mays (Maize)highly similar to ( 865) loc_os01g71310 12001.m13174 protein cytokinin dehydrogenase…	5.6261e-09	5.24923e-08
GRMZM2G083725	GRMZM2G083725_T01	2.78586	12.2978	75.3257	13.4679	misc.protease inhibitor/seed storage/lipid transfer protein (LTP) family protein	weakly similar to ( 107) AT1G27950 | Symbols: LTPG1 | LTPG1 (GLYCOSYLPHOSPHATIDYLINOSITOL-ANCHORED LIPID PROTEIN TRANSFER 1) | chr1:9740740-9741991 FORWARDweakly similar to ( 185) loc_os08g42040 12008.m26534 protein lipid transfer protein, putative, expressed seq=cds; coord=1:194657095..194659202:-1; parent_gene=GRMZM2G083725	5.61589e-55	8.66149e-53
GRMZM2G443265	GRMZM2G443265_T01	2.78565	1.05641	6.4822		transport.metabolite transporters at the envelope membrane	highly similar to ( 511) AT3G11320 | Symbols: | organic anion transmembrane transporter | chr3:3547017-3548539 REVERSEvery weakly similar to (97.1) TPT_SOLTU Triose phosphate/phosphate translocator, chloroplast precursor (cTPT) (E29) - Solanum tuberosum (Potato)highly similar to ( 568) loc_os03g17740 12003.m07199 protein organic anion transporter, putative, expressed seq=cds; coord=1:43761041..43…	4.36741e-10	4.66312e-09
GRMZM2G008740	GRMZM2G008740_T01	2.78494	1.63971	10.0434		not assigned.unknown	seq=cds; coord=7:156495372..156496439:1; parent_gene=GRMZM2G008740	8.32735e-11	9.68423e-10
GRMZM2G060993	GRMZM2G060993_T01	2.78473	0.820202	5.0328	8.05395	misc.UDP glucosyl and glucoronyl transferases	moderately similar to ( 269) AT3G16520 | Symbols: UGT88A1 | UDP-glucoronosyl/UDP-glucosyl transferase family protein | chr3:5618847-5620833 REVERSEweakly similar to ( 151) ZOX_PHAVU Zeatin O-xylosyltransferase (EC 2.4.2.40) (Zeatin O-beta-D-xylosyltransferase) - Phaseolus vulgaris (Kidney bean) (French bean)highly similar to ( 535) loc_os01g64910 12001.m12604 protein anthocyanidin 5,3-O-glucosylt…	4.36741e-10	4.66312e-09
GRMZM2G074761	GRMZM2G074761_T01	2.78214	1.35876	8.31017		mitochondrial electron transport / ATP synthesis.alternative oxidase	moderately similar to ( 419) AT3G27620 | Symbols: AOX1C | AOX1C; alternative oxidase | chr3:10229289-10230595 REVERSEmoderately similar to ( 408) AOX2_TOBAC Alternative oxidase 2, mitochondrial precursor (EC 1.-.-.-) - Nicotiana tabacum (Common tobacco)highly similar to ( 519) loc_os04g51160 12004.m10012 protein transposon protein, putative, unclassified, expressed seq=cds; coord=2:12298492..1230…	1.63307e-11	2.06741e-10
GRMZM2G136750	GRMZM2G136750_T01	2.78142	2.67047	16.312	1.66361	not assigned.unknown	seq=cds; coord=6:121384078..121384852:1; parent_gene=GRMZM2G136750	5.35102e-12	7.10491e-11
AC196726.2	AC196726.2_FGT001	2.77506	23.0998	140.465	1.89602	not assigned.unknown	seq=cds; coord=7:139525994..139526248:1; parent_gene=AC196726.2_FG001	1.22425e-27	5.55946e-26
GRMZM2G099491	GRMZM2G099491_T01	2.77326	1.74946	10.6481	1.04177	cell wall.cell wall proteins.LRR	moderately similar to ( 390) AT3G22800 | Symbols: | leucine-rich repeat family protein / extensin family protein | chr3:8063063-8064475 REVERSEweakly similar to ( 118) RPK1_IPONI Receptor-like protein kinase precursor (EC 2.7.11.1) - Ipomoea nil (Japanese morning glory) (Pharbitis nil)highly similar to ( 588) loc_os03g58110 12003.m10723 protein systemin receptor SR160 precursor, putative, express…	7.8756e-15	1.38433e-13
GRMZM2G031062	GRMZM2G031062_T01	2.77302	3.08131	18.7423	1.38634	misc.GCN5-related N-acetyltransferase	weakly similar to ( 162) AT2G32030 | Symbols: | GCN5-related N-acetyltransferase (GNAT) family protein | chr2:13632675-13633241 REVERSEmoderately similar to ( 236) loc_os03g58010 12003.m10713 protein N-acetyltransferase, putative, expressed seq=cds; coord=1:287201947..287202876:1; parent_gene=GRMZM2G031062	4.8517e-16	9.64771e-15
GRMZM2G078876	GRMZM2G078876_T01	2.7639	144.764	878.127	246.194	not assigned.unknown	very weakly similar to (86.3) loc_os03g26820 12003.m08014 protein xylogen protein 1, putative, expressed seq=cds; coord=1:66023613..66026784:-1; parent_gene=GRMZM2G078876	2.83561e-106	1.93849e-103
GRMZM2G181236	GRMZM2G181236_T01	2.75961	0.583766	3.51178		misc.cytochrome P450	moderately similar to ( 422) AT2G12190 | Symbols: | cytochrome P450, putative | chr2:4891807-4893345 REVERSEmoderately similar to ( 293) C77A3_SOYBN Cytochrome P450 77A3 (EC 1.14.-.-) - Glycine max (Soybean)highly similar to ( 655) loc_os10g37110 12010.m06511 protein transposon protein, putative, unclassified, expressed seq=cds; coord=1:223784008..223786458:-1; parent_gene=GRMZM2G181236	3.20175e-07	2.30792e-06
GRMZM2G142390	GRMZM2G142390_T01	2.75822	2.86433	17.231	1.12243	protein.postranslational modification.kinase.receptor like cytoplasmatic kinase VII	moderately similar to ( 446) AT2G05940 | Symbols: | protein kinase, putative | chr2:2287514-2289270 REVERSEmoderately similar to ( 215) NORK_MEDTR Nodulation receptor kinase precursor (EC 2.7.11.1) (Does not make infections protein 2) (Symbiosis receptor-like kinase) (MtSYMRK) - Medicago truncatula (Barrel medic)highly similar to ( 603) loc_os03g29410 12003.m08215 protein protein kinase APK1B, ch…	1.2543e-23	4.27002e-22
GRMZM2G129879	GRMZM2G129879_T01	2.75752	1.32392	7.96435	10.8893	development.unspecified	weakly similar to ( 145) loc_os08g34984 12008.m80291 protein expressed protein seq=cds; coord=1:209581024..209582088:-1; parent_gene=GRMZM2G129879	5.37587e-08	4.37226e-07
GRMZM2G367094	GRMZM2G367094_T01	2.75488	17.4467	104.627	2.48366	not assigned.unknown	seq=cds; coord=5:8461685..8462268:-1; parent_gene=GRMZM2G367094	3.60471e-39	3.04942e-37
GRMZM2G073272	GRMZM2G073272_T01	2.74822	11.1962	66.9845		RNA.regulation of transcription.WRKY domain transcription factor family	weakly similar to ( 156) AT4G31550 | Symbols: WRKY11, ATWRKY11 | WRKY11; calmodulin binding / transcription factor | chr4:15290065-15291458 REVERSEweakly similar to ( 184) loc_os04g21950 12004.m07345 protein OsWRKY51 - Superfamily of rice TFs having WRKY and zinc finger domains, expressed seq=cds; coord=5:159232314..159233530:1; parent_gene=GRMZM2G073272	1.97606e-42	1.92982e-40
GRMZM2G324999	GRMZM2G324999_T01	2.74045	20.0332	119.117	5.58434	RNA.regulation of transcription.WRKY domain transcription factor family	weakly similar to ( 115) AT4G11070 | Symbols: WRKY41, AtWRKY41 | WRKY41; transcription factor | chr4:6759303-6760763 FORWARDweakly similar to ( 193) loc_os08g29660 12008.m06969 protein OsWRKY69 - Superfamily of rice TFs having WRKY and zinc finger domains, expressed seq=cds; coord=1:216580897..216582541:1; parent_gene=GRMZM2G324999	9.44695e-70	2.54203e-67
GRMZM2G115701	GRMZM2G115701_T01	2.738	2.22706	13.235	53.8345	protein.degradation.ubiquitin.E3.SCF.FBOX	moderately similar to ( 400) AT1G47270 | Symbols: AtTLP6 | AtTLP6 (TUBBY LIKE PROTEIN 6); phosphoric diester hydrolase/ transcription factor | chr1:17326828-17328564 FORWARDhighly similar to ( 624) loc_os02g47640 12002.m09798 protein tubby-like protein, putative, expressed seq=cds; coord=5:200906659..200910228:1; parent_gene=GRMZM2G115701	1.73438e-24	6.24031e-23
GRMZM2G388608	GRMZM2G388608_T01	2.73666	2.52085	14.9315	21.593	not assigned.unknown	seq=cds; coord=1:116265288..116266108:-1; parent_gene=GRMZM2G388608	1.41164e-11	1.79879e-10
GRMZM2G475702	GRMZM2G475702_T01	2.73368	1.82378	10.7886	5.84645	protein.degradation.ubiquitin.E3.RING	moderately similar to ( 256) AT1G60190 | Symbols: | armadillo/beta-catenin repeat family protein / U-box domain-containing protein | chr1:22198403-22200463 FORWARDweakly similar to ( 177) SPL11_ORYSA Spotted leaf protein 11 (Spotted leaf11) (Cell death-related protein SPL11) - Oryza sativa (Rice)highly similar to ( 698) loc_os08g32060 12008.m07200 protein spotted leaf protein 11, putative, expres…	2.97354e-19	7.61262e-18
GRMZM5G826174	GRMZM5G826174_T01	2.72627	2.04395	12.0226		not assigned.unknown	seq=cds; coord=1:226221925..226222625:1; parent_gene=GRMZM5G826174	2.58118e-08	2.19604e-07
GRMZM2G343563	GRMZM2G343563_T01	2.72329	2.29747	13.4958	6.56687	not assigned.unknown	weakly similar to ( 137) loc_os06g39912 12006.m091732 protein expressed protein seq=cds; coord=6:102736048..102737225:-1; parent_gene=GRMZM2G343563	3.16824e-14	5.28252e-13
GRMZM2G425236	GRMZM2G425236_T01	2.7227	1.05869	6.20961		RNA.regulation of transcription.zf-HD	weakly similar to ( 122) AT4G24660 | Symbols: ATHB22, MEE68 | ATHB22 (HOMEOBOX PROTEIN 22); DNA binding / transcription factor | chr4:12724851-12725513 REVERSEmoderately similar to ( 233) loc_os03g50920 12003.m10076 protein ZF-HD protein dimerisation region containing protein, expressed seq=cds; coord=5:10212825..10214027:-1; parent_gene=GRMZM2G425236	9.02212e-08	7.07834e-07
GRMZM2G180021	GRMZM2G180021_T01	2.71195	4.43172	25.8398	58.0632	not assigned.unknown	moderately similar to ( 490) AT1G29980 | Symbols: | INVOLVED IN: biological_process unknown; LOCATED IN: plasma membrane, anchored to membrane; EXPRESSED IN: 24 plant structures; EXPRESSED DURING: 13 growth stages; CONTAINS InterPro DOMAIN/s: Protein of unknown function DUF642 (InterPro:IPR006946), Galactose-binding like (InterPro:IPR008979); BEST Arabidopsis thaliana protein match is: unknown pr…	3.86576e-33	2.37331e-31
GRMZM2G001169	GRMZM2G001169_T01	2.71176	1.51731	8.84691	17.0142	not assigned.unknown	seq=cds; coord=4:2513464..2515423:-1; parent_gene=GRMZM2G001169	2.29131e-11	2.84239e-10
AC215201.3	AC215201.3_FGT003	2.70433	1.10209	6.38877		protein.postranslational modification	moderately similar to ( 402) AT5G50860 | Symbols: | protein kinase family protein | chr5:20693778-20696983 REVERSEweakly similar to ( 175) CDC22_MEDSA Cell division control protein 2 homolog 2 (EC 2.7.11.22) - Medicago sativa (Alfalfa)highly similar to ( 697) loc_os01g70130 12001.m43356 protein transposon protein, putative, unclassified, expressed seq=cds; coord=6:142192310..142195630:1; parent_g…	6.20152e-10	6.48723e-09
GRMZM2G305834	GRMZM2G305834_T01	2.70137	6.12312	35.4244	4.22028	not assigned.unknown	seq=cds; coord=3:16612003..16613863:1; parent_gene=GRMZM2G305834	1.37825e-30	7.44902e-29
GRMZM2G036564	GRMZM2G036564_T01	2.69885	0.398003	2.29851	1.53104	cell.organisation	highly similar to ( 916) loc_os06g18900 12006.m06553 protein embryogenesis transmembrane protein, putative, expressed seq=cds; coord=6:120132638..120136791:-1; parent_gene=GRMZM2G036564	2.02846e-09	2.00187e-08
GRMZM2G071307	GRMZM2G071307_T01	2.69842	1.28908	7.44457		not assigned.unknown	very weakly similar to (88.2) loc_os01g37040 12001.m09998 protein expressed protein seq=cds; coord=3:226819115..226820640:1; parent_gene=GRMZM2G071307	7.5086e-09	6.92137e-08
GRMZM2G096952	GRMZM2G096952_T01	2.69185	5.77544	33.1574		transport.ABC transporters and multidrug resistance systems	highly similar to ( 622) AT1G17840 | Symbols: WBC11, ABCG11, DSO, COF1, ATWBC11 | WBC11 (WHITE-BROWN COMPLEX HOMOLOG PROTEIN 11); ATPase, coupled to transmembrane movement of substances / fatty acid transporter | chr1:6142870-6145894 FORWARDweakly similar to ( 185) PDR3_TOBAC Pleiotropic drug resistance protein 3 (NtPDR3) - Nicotiana tabacum (Common tobacco)nearly identical (1100) loc_os09g29660 …	5.20601e-46	6.18219e-44
GRMZM2G026780	GRMZM2G026780_T01	2.68002	17.6537	100.651	5.15203	not assigned.unknown	seq=cds; coord=1:270831294..270832294:-1; parent_gene=GRMZM2G026780	2.52847e-50	3.43844e-48
GRMZM2G366101	GRMZM2G366101_T01	2.67265	4.03771	22.9018		not assigned.unknown	seq=cds; coord=2:185925507..185925782:-1; parent_gene=GRMZM2G366101	9.20888e-07	6.09763e-06
GRMZM2G023081	GRMZM2G023081_T01	2.66771	9.88239	55.8666	2.05564	not assigned.unknown	weakly similar to ( 110) AT1G14870 | Symbols: | FUNCTIONS IN: molecular_function unknown; INVOLVED IN: response to oxidative stress; LOCATED IN: plasma membrane; EXPRESSED IN: callus; CONTAINS InterPro DOMAIN/s: EGF-type aspartate/asparagine hydroxylation conserved site (InterPro:IPR000152), Protein of unknown function Cys-rich (InterPro:IPR006461); BEST Arabidopsis thaliana protein match is: unk…	1.14735e-39	9.93868e-38
GRMZM2G124229	GRMZM2G124229_T01	2.65833	1.97085	11.0657		Biodegradation of Xenobiotics	moderately similar to ( 275) AT5G06570 | Symbols: | hydrolase | chr5:2008075-2011013 REVERSEweakly similar to ( 164) GID1_ORYSA Gibberellin receptor GID1 (EC 3.-.-.-) (Gibberellin-insensitive dwarf protein 1) (Protein GIBBERELLIN INSENSITIVE DWARF1) - Oryza sativa (Rice)moderately similar to ( 429) loc_os03g57640 12003.m10679 protein gibberellin receptor GID1L2, putative, expressed seq=cds; coord…	1.9924e-14	3.38682e-13
GRMZM2G143599	GRMZM2G143599_T01	2.65744	1.39855	7.8524	8.84857	RNA.regulation of transcription.unclassified	moderately similar to ( 391) AT5G45550 | Symbols: | mob1/phocein family protein | chr5:18462284-18464840 FORWARDmoderately similar to ( 439) loc_os10g25674 12010.m21996 protein mps one binder kinase activator-like 1A, putative, expressed seq=cds; coord=5:36283629..36286496:1; parent_gene=GRMZM2G143599	3.13799e-10	3.40946e-09
GRMZM2G117940	GRMZM2G117940_T01	2.65736	36.06	202.158		hormone metabolism.gibberelin.induced-regulated-responsive-activated	weakly similar to ( 135) AT2G30810 | Symbols: | gibberellin-regulated family protein | chr2:13127945-13128630 REVERSEweakly similar to ( 138) loc_os03g14550 12003.m06895 protein gibberellin-regulated protein 2 precursor, putative seq=cds; coord=1:113735740..113736549:1; parent_gene=GRMZM2G117940	3.29768e-45	3.74043e-43
GRMZM2G041899	GRMZM2G041899_T01	2.64547	0.553503	3.08		protein.degradation.ubiquitin.E3.RING	moderately similar to ( 325) AT5G60710 | Symbols: | zinc finger (C3HC4-type RING finger) family protein | chr5:24410953-24414849 REVERSEmoderately similar to ( 396) loc_os10g32750 12010.m06111 protein protein binding protein, putative seq=cds; coord=1:9122820..9125373:1; parent_gene=GRMZM2G041899	2.53154e-07	1.8528e-06
GRMZM2G053206	GRMZM2G053206_T01	2.64518	9.16683	50.957	1.64451	protein.degradation.aspartate protease	very weakly similar to (94.4) AT1G03230 | Symbols: | extracellular dermal glycoprotein, putative / EDGP, putative | chr1:790110-791414 FORWARDmoderately similar to ( 271) loc_os01g71080 12001.m13152 protein xylanase inhibitor TAXI-IV, putative, expressed seq=cds; coord=2:231986102..231987473:-1; parent_gene=GRMZM2G053206	1.62471e-40	1.44702e-38
GRMZM2G024476	GRMZM2G024476_T01	2.64517	0.705601	3.92636		hormone metabolism.cytokinin.synthesis-degradation	highly similar to ( 600) AT1G75450 | Symbols: CKX5, ATCKX5, ATCKX6 | CKX5 (CYTOKININ OXIDASE 5); cytokinin dehydrogenase | chr1:28315248-28318064 REVERSEmoderately similar to ( 418) CKX1_MAIZE Cytokinin dehydrogenase 1 precursor (EC 1.5.99.12) (Cytokinin oxidase 1) (CKO 1) (COX 1) (ZmCKX1) - Zea mays (Maize)highly similar to ( 822) loc_os01g56810 12001.m11838 protein cytokinin dehydrogenase 5 pre…	2.53154e-07	1.8528e-06
GRMZM5G879851	GRMZM5G879851_T01	2.62959	3.13036	17.2173	1.81081	not assigned.unknown	seq=cds; coord=8:116980593..116980948:1; parent_gene=GRMZM5G879851	1.55811e-06	9.92465e-06
GRMZM2G419938	GRMZM2G419938_T01	2.62946	28.6204	157.969	9.41621	not assigned.unknown	very weakly similar to (95.9) loc_os03g07870 12003.m06299 protein expressed protein seq=cds; coord=1:15786439..15787328:-1; parent_gene=GRMZM2G419938	1.90816e-57	3.17532e-55
GRMZM2G414915	GRMZM2G414915_T01	2.62452	7.76591	42.6209	131.953	protein.degradation.subtilases	highly similar to ( 931) AT5G51750 | Symbols: ATSBT1.3, SBT1.3 | ATSBT1.3 (ARABIDOPSIS THALIANA SUBTILASE 1.3); identical protein binding / serine-type endopeptidase | chr5:21020266-21022608 FORWARDnearly identical (1236) loc_os04g48416 12004.m101731 protein subtilisin-like protease precursor, putative, expressed seq=cds; coord=10:136292132..136296887:1; parent_gene=GRMZM2G414915	3.47703e-52	4.9133e-50
GRMZM2G052357	GRMZM2G052357_T01	2.62449	1.15625	6.34708	3.95041	cell wall.precursor synthesis.GAE	moderately similar to ( 468) AT3G23820 | Symbols: GAE6 | GAE6 (UDP-D-GLUCURONATE 4-EPIMERASE 6); UDP-glucuronate 4-epimerase/ catalytic | chr3:8603645-8605027 FORWARDvery weakly similar to (87.0) GALE1_PEA UDP-glucose 4-epimerase (EC 5.1.3.2) (Galactowaldenase) (UDP-galactose 4-epimerase) - Pisum sativum (Garden pea)highly similar to ( 618) loc_os08g41440 12008.m08122 protein NAD-dependent epimer…	1.5216e-12	2.13109e-11
GRMZM2G042101	GRMZM2G042101_T01	2.62078	95.0178	520.652	3.08124	RNA.regulation of transcription.bHLH,Basic Helix-Loop-Helix family	very weakly similar to (91.7) loc_os02g51320 12002.m10166 protein DNA binding protein, putative, expressed seq=cds; coord=4:181897625..181898975:1; parent_gene=GRMZM2G042101	1.44714e-87	6.90641e-85
GRMZM2G083195	GRMZM2G083195_T01	2.61918	3.99877	21.8004	71.0302	lipid metabolism.Phospholipid synthesis	highly similar to ( 684) AT2G38110 | Symbols: ATGPAT6, GPAT6 | GPAT6 (GLYCEROL-3-PHOSPHATE ACYLTRANSFERASE 6); 1-acylglycerol-3-phosphate O-acyltransferase/ acyltransferase | chr2:15952816-15955364 REVERSEhighly similar to ( 835) loc_os01g63580 12001.m12474 protein glycerol-3-phosphate acyltransferase 8, putative, expressed seq=cds; coord=3:178181704..178185282:1; parent_gene=GRMZM2G083195	6.99388e-35	4.75546e-33
GRMZM2G069444	GRMZM2G069444_T01	2.61819	4.61899	25.1932	2.4938	not assigned.unknown	seq=cds; coord=4:120989219..120989816:1; parent_gene=GRMZM2G069444	7.4138e-12	9.74127e-11
GRMZM2G174310	GRMZM2G174310_T01	2.61161	12.2462	66.5902	1.12701	not assigned.unknown	seq=cds; coord=1:217251801..217252801:-1; parent_gene=GRMZM2G174310	1.01431e-38	8.46734e-37
GRMZM2G056889	GRMZM2G056889_T01	2.60849	5.53838	30.051	1.649	not assigned.unknown	moderately similar to ( 201) loc_os02g43900 12002.m09424 protein expressed protein seq=cds; coord=5:191630274..191631739:-1; parent_gene=GRMZM2G056889	6.51332e-30	3.38291e-28
GRMZM2G474326	GRMZM2G474326_T01	2.60544	1.38556	7.50167	1.1221	hormone metabolism.ethylene.signal transduction	very weakly similar to (94.4) AT4G17500 | Symbols: ATERF-1 | ATERF-1 (ETHYLENE RESPONSIVE ELEMENT BINDING FACTOR 1); DNA binding / transcription activator/ transcription factor | chr4:9759405-9760211 FORWARDvery weakly similar to (90.5) ERF1_TOBAC Ethylene-responsive transcription factor 1 (Ethylene-responsive element-binding factor 1) (EREBP-1) (NtERF1) - Nicotiana tabacum (Common tobacco)weakly…	3.31466e-08	2.77527e-07
GRMZM2G077212	GRMZM2G077212_T01	2.60061	1.9377	10.4444		RNA.regulation of transcription.unclassified	moderately similar to ( 465) AT5G26600 | Symbols: | catalytic/ pyridoxal phosphate binding | chr5:9377455-9378882 FORWARDhighly similar to ( 626) loc_os01g18640 12001.m42973 protein isopenicillin N epimerase, putative, expressed seq=cds; coord=8:560969..563022:-1; parent_gene=GRMZM2G077212	2.05656e-17	4.55106e-16
GRMZM2G165901	GRMZM2G165901_T01	2.59216	1.39428	7.4726	4.36267	RNA.RNA binding	weakly similar to ( 138) AT2G21660 | Symbols: ATGRP7, CCR2 | CCR2 (COLD, CIRCADIAN RHYTHM, AND RNA BINDING 2); RNA binding / double-stranded DNA binding / single-stranded DNA binding | chr2:9265477-9266316 REVERSEweakly similar to ( 172) GRPA_MAIZE Glycine-rich RNA-binding, abscisic acid-inducible protein - Zea mays (Maize)weakly similar to ( 149) loc_os03g46770 12003.m34905 protein glycine-rich …	4.56768e-09	4.29817e-08
GRMZM2G378442	GRMZM2G378442_T01	2.59027	1.58912	8.51686	1.31621	not assigned.unknown	seq=cds; coord=3:45046974..45048075:-1; parent_gene=GRMZM2G378442	4.56768e-09	4.29817e-08
GRMZM5G833747	GRMZM5G833747_T03	2.58936	1.00407	5.3691	1.24231	nucleotide metabolism.phosphotransfer and pyrophosphatases.nucleoside diphosphate kinase	moderately similar to ( 316) AT4G23900 | Symbols: | nucleoside diphosphate kinase 4 (NDK4) | chr4:12424505-12426318 FORWARDmoderately similar to ( 305) NDK4_SPIOL Nucleoside diphosphate kinase 4, chloroplast precursor (EC 2.7.4.6) (Nucleoside diphosphate kinase IV) (NDK IV) (NDP kinase IV) (NDPK IV) (Nucleoside diphosphate kinase III) - Spinacia oleracea (Spinach)moderately similar to ( 335) loc_…	1.93662e-07	1.43861e-06
GRMZM2G135739	GRMZM2G135739_T01	2.58539	11.7288	62.7407		transport.sugars	highly similar to ( 672) AT1G11260 | Symbols: STP1, ATSTP1 | STP1 (SUGAR TRANSPORTER 1); carbohydrate transmembrane transporter/ sugar:hydrogen symporter | chr1:3777460-3780133 FORWARDhighly similar to ( 677) STC_RICCO Sugar carrier protein C - Ricinus communis (Castor bean)highly similar to ( 882) loc_os07g01560 12007.m28944 protein sugar transport protein 1, putative, expressed seq=cds; coord=7…	3.65939e-61	7.2313e-59
GRMZM2G148561	GRMZM2G148561_T01	2.58036	11.9041	63.2704		RNA.regulation of transcription.WRKY domain transcription factor family	weakly similar to ( 108) AT2G23320 | Symbols: WRKY15 | WRKY15; calmodulin binding / transcription factor | chr2:9924998-9925991 FORWARDweakly similar to ( 169) loc_os08g13840 12008.m26630 protein OsWRKY25 - Superfamily of rice TFs having WRKY and zinc finger domains, expressed seq=cds; coord=4:69920108..69921324:-1; parent_gene=GRMZM2G148561	1.15578e-41	1.09903e-39
GRMZM2G076343	GRMZM2G076343_T01	2.57803	3.65239	19.3869		not assigned.unknown	moderately similar to ( 207) loc_os04g01950 12004.m05511 protein legume lectins beta domain containing protein, expressed seq=cds; coord=2:113312679..113314160:1; parent_gene=GRMZM2G076343	1.41968e-21	4.24963e-20
GRMZM2G069016	GRMZM2G069016_T01	2.57679	19.4173	102.993	42.6947	transport.nucleotides	weakly similar to ( 142) AT1G30840 | Symbols: ATPUP4 | ATPUP4; purine transmembrane transporter | chr1:10974581-10975729 FORWARDmoderately similar to ( 314) loc_os05g48300 12005.m08901 protein purine permease, putative, expressed seq=cds; coord=6:163663119..163664643:-1; parent_gene=GRMZM2G069016	8.70331e-59	1.51822e-56
GRMZM2G119766	GRMZM2G119766_T01	2.57507	9.99814	53.052	40.0959	not assigned.unknown	moderately similar to ( 392) AT2G17230 | Symbols: EXL5 | EXL5 (EXORDIUM LIKE 5) | chr2:7494892-7495983 REVERSEmoderately similar to ( 346) loc_os06g04250 12006.m05154 protein phi-1-like phosphate-induced protein, putative, expressed seq=cds; coord=1:84763957..84765198:1; parent_gene=GRMZM2G119766	1.44192e-37	1.13975e-35
GRMZM2G113089	GRMZM2G113089_T01	2.57318	0.892383	4.72414	2.34877	not assigned.unknown	moderately similar to ( 339) loc_os01g51720 12001.m11350 protein hypothetical protein seq=cds; coord=10:5747157..5750334:-1; parent_gene=GRMZM2G113089	8.86683e-08	6.98032e-07
GRMZM5G850455	GRMZM5G850455_T02	2.57278	9.03696	47.8403	15.5521	misc.protease inhibitor/seed storage/lipid transfer protein (LTP) family protein	weakly similar to ( 134) AT2G44300 | Symbols: | lipid transfer protein-related | chr2:18307468-18308286 REVERSEmoderately similar to ( 252) loc_os03g07100 12003.m06227 protein lipid transfer protein, putative, expressed seq=cds; coord=1:14103040..14104361:1; parent_gene=GRMZM5G850455	6.14504e-32	3.54869e-30
GRMZM5G889719	GRMZM5G889719_T01	2.56843	4.89271	25.8107	3.61948	RNA.regulation of transcription.AP2/EREBP, APETALA2/Ethylene-responsive element binding protein family	weakly similar to ( 124) AT2G44940 | Symbols: | AP2 domain-containing transcription factor TINY, putative | chr2:18537294-18538181 FORWARDvery weakly similar to (84.7) ERF3_TOBAC Ethylene-responsive transcription factor 3 (Ethylene-responsive element-binding factor 3 homolog) (EREBP-5) (NtERF5) - Nicotiana tabacum (Common tobacco)weakly similar to ( 173) loc_os10g41130 12010.m06878 protein DREB-l…	2.82126e-17	6.17309e-16
GRMZM2G468657	GRMZM2G468657_T01	2.56796	23.3773	122.971		RNA.regulation of transcription.unclassified	moderately similar to ( 241) AT2G03200 | Symbols: | aspartyl protease family protein | chr2:966506-967891 REVERSEmoderately similar to ( 481) loc_os07g34940 12007.m07750 protein aspartic proteinase nepenthesin-1 precursor, putative, expressed seq=cds; coord=7:154506943..154508699:-1; parent_gene=GRMZM2G468657	8.07308e-66	1.90842e-63
AC210204.3	AC210204.3_FGT002	2.56743	181.814	956.067	109.841	stress.abiotic.cold	weakly similar to ( 154) AT5G23950 | Symbols: | C2 domain-containing protein | chr5:8082789-8083448 FORWARDmoderately similar to ( 243) loc_os09g39770 12009.m06914 protein C2 domain containing protein, expressed seq=cds; coord=2:164667085..164668830:-1; parent_gene=AC210204.3_FG002	4.91898e-96	2.89351e-93
GRMZM2G371345	GRMZM2G371345_T01	2.56718	15.4476	81.34	31.4597	transport.amino acids	weakly similar to ( 118) AT1G15690 | Symbols: AVP1, ATAVP3, AVP-3 | AVP1; ATPase/ hydrogen-translocating pyrophosphatase | chr1:5399115-5402185 FORWARDweakly similar to ( 126) AVP_HORVU Pyrophosphate-energized vacuolar membrane proton pump (EC 3.6.1.1) (Pyrophosphate-energized inorganic pyrophosphatase) (H(+)-PPase) - Hordeum vulgare (Barley)weakly similar to ( 126) loc_os06g08080 12006.m31844 pr…	1.47898e-39	1.26811e-37
GRMZM2G061851	GRMZM2G061851_T01	2.56292	1.82418	9.57713	2.85391	secondary metabolism.phenylpropanoids.lignin biosynthesis.PAL	very weakly similar to (84.0) PAL2_ORYSA Phenylalanine ammonia-lyase (EC 4.3.1.5) - Oryza sativa (Rice)very weakly similar to (85.9) loc_os02g41650 12002.m33781 protein phenylalanine ammonia-lyase, putative, expressed seq=cds; coord=10:106197507..106201772:1; parent_gene=GRMZM2G061851	7.5086e-09	6.92137e-08
GRMZM2G078164	GRMZM2G078164_T01	2.55667	3.49392	18.277	6.61256	not assigned.unknown	weakly similar to ( 128) loc_os03g16600 12003.m07093 protein expressed protein seq=cds; coord=1:39904165..39905212:-1; parent_gene=GRMZM2G078164	5.323e-16	1.0527e-14
GRMZM2G344911	GRMZM2G344911_T01	2.5564	3.06669	16.0421	4.0493	misc.short chain dehydrogenase/reductase (SDR)	moderately similar to ( 209) AT4G13180 | Symbols: | short-chain dehydrogenase/reductase (SDR) family protein | chr4:7657373-7658164 REVERSEweakly similar to ( 190) SDR1_PICAB Short-chain type dehydrogenase/reductase (EC 1.-.-.-) - Picea abies (Norway spruce) (Picea excelsa)moderately similar to ( 337) loc_os03g53690 12003.m10339 protein estradiol 17-beta-dehydrogenase 8, putative, expressed seq=c…	1.71889e-15	3.23734e-14
GRMZM2G104626	GRMZM2G104626_T01	2.55584	9.05703	47.2427	1.70843	lipid metabolism.FA synthesis and FA elongation.beta ketoacyl CoA synthase	highly similar to ( 619) AT1G01120 | Symbols: KCS1 | KCS1 (3-KETOACYL-COA SYNTHASE 1); acyltransferase/ fatty acid elongase | chr1:57392-58978 REVERSEhighly similar to ( 890) loc_os03g14170 12003.m06860 protein senescence-associated protein 15, putative, expressed seq=cds; coord=9:142926831..142929660:1; parent_gene=GRMZM2G104626	2.78277e-54	4.18973e-52
GRMZM2G403276	GRMZM2G403276_T01	2.55234	1.63843	8.54221	2.76436	cell wall.cell wall proteins.AGPs.AGP	weakly similar to ( 154) AT5G55730 | Symbols: FLA1 | FLA1 (FASCICLIN-LIKE ARAB INOGALACTAN 1) | chr5:22558375-22560392 REVERSEmoderately similar to ( 231) loc_os09g30010 12009.m06152 protein fasciclin-like arabinogalactan protein 8 precursor, putative, expressed seq=cds; coord=2:188652134..188653299:1; parent_gene=GRMZM2G403276	3.61791e-09	3.45357e-08
GRMZM2G001824	GRMZM2G001824_T01	2.55015	11.3394	59.0297		RNA.regulation of transcription.MYB domain transcription factor family	moderately similar to ( 240) AT5G49620 | Symbols: AtMYB78 | AtMYB78 (myb domain protein 78); DNA binding / transcription factor | chr5:20137491-20139384 REVERSEweakly similar to ( 151) MYBA2_ORYSA Myb-related protein MYBAS2 - Oryza sativa (Rice)moderately similar to ( 259) loc_os05g04210 12005.m04954 protein cpm5, putative, expressed seq=cds; coord=10:85393574..85394991:-1; parent_gene=GRMZM2G001…	4.64215e-43	4.69674e-41
GRMZM2G057486	GRMZM2G057486_T01	2.54876	3.4447	17.9221	5.56056	protein.degradation.ubiquitin.E3.SCF.FBOX	moderately similar to ( 377) AT1G10780 | Symbols: | F-box family protein | chr1:3592875-3594310 REVERSEhighly similar to ( 594) loc_os08g36570 12008.m07646 protein expressed protein seq=cds; coord=4:56501836..56503741:-1; parent_gene=GRMZM2G057486	1.23344e-22	3.9693e-21
GRMZM2G112205	GRMZM2G112205_T01	2.54601	3.28008	17.0542		RNA.regulation of transcription.unclassified	moderately similar to ( 305) AT1G01300 | Symbols: | aspartyl protease family protein | chr1:117065-118522 FORWARDhighly similar to ( 529) loc_os01g52190 12001.m11393 protein aspartic proteinase nepenthesin-1 precursor, putative seq=cds; coord=3:202113571..202114929:-1; parent_gene=GRMZM2G112205	9.6489e-18	2.19281e-16
GRMZM2G028677	GRMZM2G028677_T01	2.5453	3.73907	19.3942	7.57024	amino acid metabolism.synthesis.aromatic aa.phenylalanine	highly similar to ( 541) AT2G30490 | Symbols: ATC4H, C4H, CYP73A5 | C4H (CINNAMATE-4-HYDROXYLASE); trans-cinnamate 4-monooxygenase | chr2:12993861-12995683 REVERSEhighly similar to ( 552) TCMO_CATRO Trans-cinnamate 4-monooxygenase (EC 1.14.13.11) (Cinnamic acid 4-hydroxylase) (CA4H) (C4H) (P450C4H) (Cytochrome P450 73) - Catharanthus roseus (Rosy periwinkle) (Madagascar periwinkle)highly similar …	1.19044e-25	4.64677e-24
GRMZM2G070881	GRMZM2G070881_T01	2.53901	2.47977	12.8292	10.5433	protein.degradation.ubiquitin	moderately similar to ( 390) AT2G12550 | Symbols: | ubiquitin-associated (UBA)/TS-N domain-containing protein | chr2:5114881-5118486 FORWARDhighly similar to ( 630) loc_os04g55150 12004.m35482 protein UBA/TS-N domain containing protein, expressed seq=cds; coord=2:5925456..5929946:-1; parent_gene=GRMZM2G070881	7.36476e-19	1.84257e-17
GRMZM2G082034	GRMZM2G082034_T01	2.53869	3.77055	19.4567	7.04024	major CHO metabolism.degradation.starch.starch cleavage	moderately similar to ( 330) AT5G18670 | Symbols: BMY3, BAM9 | BMY3; beta-amylase/ catalytic/ cation binding | chr5:6226138-6227999 FORWARDweakly similar to ( 182) AMYB_MAIZE Beta-amylase (EC 3.2.1.2) (1,4-alpha-D-glucan maltohydrolase) - Zea mays (Maize)highly similar to ( 600) loc_os03g22790 12003.m07677 protein beta-amylase, putative, expressed seq=cds; coord=1:60087923..60089930:1; parent_gen…	1.70609e-25	6.57834e-24
GRMZM2G082670	GRMZM2G082670_T01	2.53529	6.87529	35.4777	1.70133	not assigned.unknown	weakly similar to ( 102) loc_os04g43310 12004.m09295 protein expressed protein seq=cds; coord=2:28702690..28703731:-1; parent_gene=GRMZM2G082670	2.44539e-25	9.3576e-24
GRMZM5G879749	GRMZM5G879749_T02	2.53501	1.4628	7.52873	2.71483	protein.degradation.serine protease	highly similar to ( 668) AT4G30610 | Symbols: BRS1, SCPL24 | BRS1 (BRI1 SUPPRESSOR 1); serine-type carboxypeptidase | chr4:14944219-14948391 FORWARDmoderately similar to ( 487) CBP2_WHEAT Serine carboxypeptidase 2 (EC 3.4.16.6) (Serine carboxypeptidase II) (Carboxypeptidase D) (CPDW-II) (CP-WII) [Contains: Serine carboxypeptidase 2 chain A (Serine carboxypeptidase II chain A); Serine carboxypepti…	1.6826e-12	2.34231e-11
GRMZM5G853245	GRMZM5G853245_T03	2.53209	18.7197	96.4248	4.14537	RNA.regulation of transcription.C3H zinc finger family	moderately similar to ( 245) AT4G29190 | Symbols: | zinc finger (CCCH-type) family protein | chr4:14392233-14393303 REVERSEmoderately similar to ( 467) loc_os01g09620 12001.m42903 protein nucleic acid binding protein, putative, expressed seq=cds; coord=3:6681782..6683686:1; parent_gene=GRMZM5G853245	1.0467e-60	2.00571e-58
GRMZM2G035599	GRMZM2G035599_T01	2.52704	2.11083	10.8269	3.8238	OPP.non-reductive PP.ribose 5-phosphate isomerase	moderately similar to ( 240) AT2G01290 | Symbols: | ribose-5-phosphate isomerase | chr2:149192-149989 REVERSEmoderately similar to ( 385) loc_os04g24140 12004.m07548 protein ribose-5-phosphate isomerase, putative, expressed seq=cds; coord=2:144880257..144881689:1; parent_gene=GRMZM2G035599	8.79146e-13	1.26419e-11
GRMZM2G077197	GRMZM2G077197_T01	2.52296	1.03588	5.29683		cell.organisation	moderately similar to ( 460) AT1G64280 | Symbols: NPR1, SAI1, NIM1, ATNPR1 | NPR1 (NONEXPRESSER OF PR GENES 1); protein binding / transcription activator | chr1:23853329-23855407 REVERSEhighly similar to ( 839) loc_os01g09800 12001.m07604 protein regulatory protein NPR1, putative, expressed seq=cds; coord=3:5982151..5986991:1; parent_gene=GRMZM2G077197	2.52094e-11	3.11351e-10
GRMZM2G001514	GRMZM2G001514_T01	2.51797	34.6417	176.592	9.22451	cell wall.cell wall proteins.AGPs.AGP	weakly similar to ( 102) AT5G44130 | Symbols: FLA13 | FLA13 (FASCICLIN-LIKE ARABINOGALACTAN PROTEIN 13 PRECURSOR) | chr5:17761128-17761871 FORWARDweakly similar to ( 189) loc_os05g48900 12005.m08961 protein fasciclin-like arabinogalactan protein 7 precursor, putative, expressed seq=cds; coord=8:69592559..69594672:1; parent_gene=GRMZM2G001514	2.6482e-74	8.58765e-72
GRMZM2G121309	GRMZM2G121309_T01	2.50701	3.27644	16.5768	8.16441	RNA.regulation of transcription.Aux/IAA family	weakly similar to ( 189) AT3G16500 | Symbols: PAP1, IAA26 | PAP1 (PHYTOCHROME-ASSOCIATED PROTEIN 1); transcription factor | chr3:5612801-5614208 REVERSEmoderately similar to ( 305) IAA7_ORYSA Auxin-responsive protein IAA7 (Indoleacetic acid-induced protein 7) - Oryza sativa (Rice)moderately similar to ( 305) loc_os02g13520 12002.m06598 protein OsIAA7 - Auxin-responsive Aux/IAA gene family member,…	2.37102e-22	7.45001e-21
GRMZM2G119736	GRMZM2G119736_T01	2.50567	2.39161	12.0853	1.45264	signalling.receptor kinases.Catharanthus roseus-like RLK1	moderately similar to ( 240) AT5G24010 | Symbols: | protein kinase family protein | chr5:8113910-8116384 FORWARDhighly similar to ( 691) loc_os03g03290 12003.m05865 protein ATP binding protein, putative, expressed seq=cds; coord=1:5325922..5327918:1; parent_gene=GRMZM2G119736	2.50476e-18	6.01666e-17
GRMZM2G112176	GRMZM2G112176_T01	2.50264	2.93121	14.768	8.90193	gluconeogenese/ glyoxylate cycle.isocitrate lyase	weakly similar to ( 166) AT2G43180 | Symbols: | catalytic | chr2:17953832-17955774 REVERSEvery weakly similar to (95.9) CPPM_DIACA Putative carboxyvinyl-carboxyphosphonate phosphorylmutase (EC 2.7.8.23) (Carboxyphosphonoenolpyruvate phosphonomutase) (CPEP phosphonomutase) (PSR132) - Dianthus caryophyllus (Carnation) (Clove pink)moderately similar to ( 219) loc_os04g31700 12004.m08270 protein meth…	4.01797e-11	4.83494e-10
GRMZM2G004748	GRMZM2G004748_T01	2.49855	3.4091	17.1564	37.4053	transport.ABC transporters and multidrug resistance systems	nearly identical (1776) AT4G25960 | Symbols: PGP2 | PGP2 (P-GLYCOPROTEIN 2); ATPase, coupled to transmembrane movement of substances | chr4:13177438-13183425 FORWARDhighly similar to ( 981) MDR_ORYSA Putative multidrug resistance protein (P-glycoprotein) - Oryza sativa (Rice)nearly identical (2120) loc_os02g46680 12002.m33438 protein multidrug resistance protein 2, putative, expressed seq=cds; co…	3.53113e-39	2.99719e-37
GRMZM2G080041	GRMZM2G080041_T01	2.49839	1.53796	7.7188		signalling.receptor kinases.leucine rich repeat XI	highly similar to ( 926) AT5G46330 | Symbols: FLS2 | FLS2 (FLAGELLIN-SENSITIVE 2); ATP binding / kinase/ protein binding / protein serine/threonine kinase/ transmembrane receptor protein serine/threonine kinase | chr5:18791802-18795407 FORWARDmoderately similar to ( 474) RPK1_IPONI Receptor-like protein kinase precursor (EC 2.7.11.1) - Ipomoea nil (Japanese morning glory) (Pharbitis nil)nearly id…	2.0594e-20	5.775e-19
GRMZM2G049930	GRMZM2G049930_T01	2.49646	1.42356	7.13646		stress.abiotic.unspecified	moderately similar to ( 222) AT5G38960 | Symbols: | germin-like protein, putative | chr5:15592992-15593783 FORWARDweakly similar to ( 185) RHRE_PEA Rhicadhesin receptor precursor (Germin-like protein) - Pisum sativum (Garden pea)moderately similar to ( 352) loc_os12g05860 12012.m04577 protein germin-like protein subfamily 1 member 8 precursor, putative, expressed seq=cds; coord=10:59009034..59010…	9.56032e-09	8.66113e-08
GRMZM2G105844	GRMZM2G105844_T01	2.49632	41.2094	207.106	365.912	cell wall.modification	moderately similar to ( 329) AT1G69530 | Symbols: ATEXPA1, EXP1, AT-EXP1, ATEXP1, ATHEXP ALPHA 1.2 | ATEXPA1 (ARABIDOPSIS THALIANA EXPANSIN A1) | chr1:26142034-26143200 FORWARDmoderately similar to ( 395) EXPA5_ORYSA Expansin-A5 precursor (OsEXPA5) (Alpha-expansin-5) (OsEXP5) (OsaEXPa1.20) - Oryza sativa (Rice)moderately similar to ( 395) loc_os02g51040 12002.m10138 protein alpha-expansin 15 prec…	1.56792e-72	4.77818e-70
GRMZM5G831200	GRMZM5G831200_T01	2.4895	22.0163	109.649	42.2662	cell wall.degradation.pectate lyases and polygalacturonases	moderately similar to ( 458) AT1G23460 | Symbols: | polygalacturonase | chr1:8327382-8329622 FORWARDmoderately similar to ( 321) PGLR_ACTCH Polygalacturonase precursor (EC 3.2.1.15) (PG) (Pectinase) - Actinidia chinensis (Kiwi) (Yangtao)highly similar to ( 617) loc_os02g03750 12002.m05724 protein polygalacturonase precursor, putative, expressed seq=cds; coord=5:74450298..74452700:-1; parent_gene=…	3.57298e-61	7.11614e-59
GRMZM2G083797	GRMZM2G083797_T01	2.4878	10.872	54.0421		stress.biotic	moderately similar to ( 488) AT2G34930 | Symbols: | disease resistance family protein | chr2:14737169-14739886 REVERSEmoderately similar to ( 229) RPK1_IPONI Receptor-like protein kinase precursor (EC 2.7.11.1) - Ipomoea nil (Japanese morning glory) (Pharbitis nil)highly similar to ( 791) loc_os11g35450 12011.m07397 protein leucine-rich repeat receptor protein kinase EXS precursor, putative, expr…	2.4289e-57	4.01546e-55
GRMZM2G458494	GRMZM2G458494_T01	2.48727	36.2467	180.616	2.55813	development.unspecified	highly similar to ( 535) AT2G39210 | Symbols: | nodulin family protein | chr2:16366287-16368231 REVERSEhighly similar to ( 735) loc_os07g09010 12007.m05357 protein nitrate and chloride transporter, putative, expressed seq=cds; coord=7:13615789..13617804:-1; parent_gene=GRMZM2G458494	1.24632e-72	3.84445e-70
GRMZM2G151811	GRMZM2G151811_T01	2.4866	2.19696	10.9507	1.03258	RNA.regulation of transcription.EIN3-like(EIL) transcription factor family	moderately similar to ( 311) AT3G20770 | Symbols: EIN3 | EIN3 (ETHYLENE-INSENSITIVE3); transcription factor | chr3:7260702-7262588 REVERSEmoderately similar to ( 433) loc_os07g48630 12007.m29024 protein ETHYLENE-INSENSITIVE3-like 1 protein, putative, expressed seq=cds; coord=7:173951359..173953387:-1; parent_gene=GRMZM2G151811	7.58512e-17	1.60149e-15
GRMZM2G147687	GRMZM2G147687_T01	2.47539	0.53543	2.64838		cell wall.degradation.cellulases and beta -1,4-glucanases	highly similar to ( 924) AT5G20950 | Symbols: | glycosyl hydrolase family 3 protein | chr5:7107609-7110775 REVERSEnearly identical (1088) loc_os03g53800 12003.m101132 protein periplasmic beta-glucosidase precursor, putative, expressed seq=cds; coord=1:276305013..276310701:1; parent_gene=GRMZM2G147687	8.64701e-07	5.76331e-06
GRMZM2G447632	GRMZM2G447632_T01	2.47462	1.6488	8.15544	3.15277	misc.glutathione S transferases	weakly similar to ( 186) AT1G10360 | Symbols: ATGSTU18, GST29 | ATGSTU18 (GLUTATHIONE S-TRANSFERASE TAU 18); glutathione transferase | chr1:3395738-3396806 REVERSEmoderately similar to ( 207) GSTU6_ORYSA Probable glutathione S-transferase GSTU6 (EC 2.5.1.18) (28 kDa cold-induced protein) - Oryza sativa (Rice)moderately similar to ( 291) loc_os01g49710 12001.m11158 protein glutathione S-transferas…	8.64701e-07	5.76331e-06
AC209987.4	AC209987.4_FGT002	2.47236	22.6956	111.939	43.2632	misc.cytochrome P450	highly similar to ( 579) AT1G11600 | Symbols: CYP77B1 | CYP77B1; electron carrier/ heme binding / iron ion binding / monooxygenase/ oxygen binding | chr1:3902090-3903622 FORWARDmoderately similar to ( 382) C77A3_SOYBN Cytochrome P450 77A3 (EC 1.14.-.-) - Glycine max (Soybean)highly similar to ( 813) loc_os06g46680 12006.m09194 protein cytochrome P450 77A3, putative, expressed seq=cds; coord=5:467…	1.81228e-66	4.45047e-64
GRMZM2G033413	GRMZM2G033413_T01	2.47061	2.19134	10.8097	36.7134	hormone metabolism.abscisic acid.signal transduction	weakly similar to ( 142) AT4G34000 | Symbols: ABF3, DPBF5 | ABF3 (ABSCISIC ACID RESPONSIVE ELEMENTS-BINDING FACTOR 3); DNA binding / protein binding / transcription activator/ transcription factor | chr4:16296008-16297594 FORWARDmoderately similar to ( 356) loc_os06g10880 12006.m091641 protein bZIP transcription factor family protein, expressed seq=cds; coord=9:8228733..8238999:-1; parent_gene=GR…	5.61948e-13	8.24952e-12
GRMZM2G331027	GRMZM2G331027_T01	2.46914	1.0393	5.11538	1.43468	not assigned.unknown	weakly similar to ( 118) AT5G42860 | Symbols: | unknown protein | chr5:17183339-17184857 REVERSEmoderately similar to ( 224) loc_os04g59330 12004.m35067 protein expressed protein seq=cds; coord=2:24991996..24994717:-1; parent_gene=GRMZM2G331027	3.31466e-08	2.77527e-07
GRMZM2G365160	GRMZM2G365160_T01	2.46723	26.0787	128.334	45.6626	amino acid metabolism.synthesis.aromatic aa.chorismate.3-deoxy-D-arabino-heptulosonate 7-phosphate synthase	highly similar to ( 769) AT1G22410 | Symbols: | 2-dehydro-3-deoxyphosphoheptonate aldolase, putative / 3-deoxy-D-arabino-heptulosonate 7-phosphate synthase, putative / DAHP synthetase, putative | chr1:7912120-7914742 FORWARDhighly similar to ( 867) AROG_ORYSA Phospho-2-dehydro-3-deoxyheptonate aldolase 2, chloroplast precursor (EC 2.5.1.54) (Phospho-2-keto-3-deoxyheptonate aldolase 2) (DAHP synth…	2.95304e-66	7.04661e-64
GRMZM2G110685	GRMZM2G110685_T01	2.46719	0.58032	2.85103	2.88838	signalling.receptor kinases.leucine rich repeat XI	highly similar to ( 810) AT1G28440 | Symbols: HSL1 | HSL1 (HAESA-Like 1); ATP binding / kinase/ protein serine/threonine kinase | chr1:9996914-10000171 FORWARDmoderately similar to ( 408) RPK1_IPONI Receptor-like protein kinase precursor (EC 2.7.11.1) - Ipomoea nil (Japanese morning glory) (Pharbitis nil)nearly identical (1073) loc_os09g15700 12009.m04831 protein receptor-like protein kinase 5 pr…	1.55164e-08	1.3718e-07
GRMZM2G319947	GRMZM2G319947_T01	2.46494	3.33336	16.3629	2.96948	not assigned.unknown	very weakly similar to (90.5) AT5G50900 | Symbols: | armadillo/beta-catenin repeat family protein | chr5:20705051-20706718 REVERSEmoderately similar to ( 244) loc_os11g31590 12011.m07061 protein armadillo/beta-catenin-like repeat family protein, expressed seq=cds; coord=2:222648643..222649836:1; parent_gene=GRMZM2G319947	2.2624e-15	4.20155e-14
GRMZM2G043857	GRMZM2G043857_T01	2.46354	12.2304	60.1636	26.9561	cell.organisation	highly similar to ( 502) loc_os06g19110 12006.m06574 protein cadmium tolerance factor, putative, expressed seq=cds; coord=1:41427933..41431457:1; parent_gene=GRMZM2G043857	1.33364e-58	2.29476e-56
GRMZM2G055684	GRMZM2G055684_T01	2.46346	37.6052	184.84	8.33702	protein.degradation.subtilases	moderately similar to ( 447) AT2G05920 | Symbols: | subtilase family protein | chr2:2269831-2272207 REVERSEhighly similar to ( 971) loc_os05g36010 12005.m07831 protein subtilisin-like protease precursor, putative, expressed seq=cds; coord=8:101208361..101210989:1; parent_gene=GRMZM2G055684	7.9812e-76	2.72806e-73
GRMZM5G899080	GRMZM5G899080_T01	2.46282	2.80816	13.7744	57.7297	not assigned.unknown	seq=cds; coord=2:6582610..6583458:1; parent_gene=GRMZM5G899080	7.28722e-09	6.73203e-08
GRMZM2G090432	GRMZM2G090432_T01	2.45434	9.69939	47.1179		misc.cytochrome P450	moderately similar to ( 324) AT4G37330 | Symbols: CYP81D4 | CYP81D4; electron carrier/ heme binding / iron ion binding / monooxygenase/ oxygen binding | chr4:17562547-17564569 REVERSEmoderately similar to ( 244) C93A1_SOYBN Cytochrome P450 93A1 (EC 1.14.-.-) - Glycine max (Soybean)highly similar to ( 657) loc_os03g55240 12003.m10439 protein cytochrome P450 81E1, putative, expressed seq=cds; coord…	1.78797e-45	2.04637e-43
GRMZM2G125216	GRMZM2G125216_T01	2.45373	2.57567	12.5432		not assigned.unknown	very weakly similar to (94.4) loc_os01g70500 12001.m13097 protein avr9/Cf-9 rapidly elicited protein 146, putative, expressed seq=cds; coord=3:155735096..155736393:1; parent_gene=GRMZM2G125216	2.96428e-13	4.50212e-12
GRMZM5G863420	GRMZM5G863420_T01	2.44978	3.46391	16.8371	12.0626	RNA.regulation of transcription.WRKY domain transcription factor family	weakly similar to ( 134) AT5G64810 | Symbols: WRKY51, ATWRKY51 | WRKY51; transcription factor | chr5:25908415-25909687 FORWARDmoderately similar to ( 219) loc_os05g46020 12005.m08727 protein OsWRKY7 - Superfamily of rice TFs having WRKY and zinc finger domains, expressed seq=cds; coord=6:161477481..161478917:1; parent_gene=GRMZM5G863420	3.46567e-15	6.29294e-14
GRMZM2G122810	GRMZM2G122810_T01	2.44956	2.87367	13.945	11.1514	hormone metabolism.brassinosteroid.synthesis-degradation.sterols.SMT1	highly similar to ( 504) AT5G13710 | Symbols: SMT1, CPH | SMT1 (STEROL METHYLTRANSFERASE 1); sterol 24-C-methyltransferase | chr5:4424048-4426866 REVERSEhighly similar to ( 582) SMT1_ORYSA Cycloartenol-C-24-methyltransferase 1 (EC 2.1.1.41) (24-sterol C-methyltransferase 1) (Sterol C-methyltransferase 1) - Oryza sativa (Rice)highly similar to ( 582) loc_os07g10600 12007.m28956 protein cycloarteno…	1.92495e-17	4.26729e-16
GRMZM2G070943	GRMZM2G070943_T01	2.44856	3.57064	17.3322		not assigned.unknown	moderately similar to ( 219) loc_os10g41800 12010.m06938 protein expressed protein seq=cds; coord=1:96309360..96310652:-1; parent_gene=GRMZM2G070943	5.02276e-17	1.07302e-15
GRMZM2G003506	GRMZM2G003506_T01	2.44636	18.9254	91.7645	2.63122	hormone metabolism.auxin.induced-regulated-responsive-activated	moderately similar to ( 343) AT4G12980 | Symbols: | auxin-responsive protein, putative | chr4:7589670-7591074 REVERSEhighly similar to ( 521) loc_os03g09900 12003.m06444 protein membrane protein, putative, expressed seq=cds; coord=1:24674837..24677482:-1; parent_gene=GRMZM2G003506	3.14107e-57	5.09296e-55
GRMZM2G463493	GRMZM2G463493_T01	2.43648	0.45249	2.17765	4.0844	signalling.receptor kinases.leucine rich repeat XI	highly similar to ( 971) AT5G56040 | Symbols: | leucine-rich repeat protein kinase, putative | chr5:22695050-22698410 FORWARDmoderately similar to ( 420) RPK1_IPONI Receptor-like protein kinase precursor (EC 2.7.11.1) - Ipomoea nil (Japanese morning glory) (Pharbitis nil)nearly identical (1647) loc_os01g07560 12001.m07382 protein receptor-like protein kinase precursor, putative, expressed seq=cds…	2.51541e-08	2.14728e-07
GRMZM2G358899	GRMZM2G358899_T01	2.43624	2.49816	12.0226	3.90835	not assigned.unknown	seq=cds; coord=1:34369697..34370397:1; parent_gene=GRMZM2G358899	8.86683e-08	6.98032e-07
GRMZM2G028926	GRMZM2G028926_T01	2.43497	18.4815	88.9438	4.9598	signalling.calcium	highly similar to ( 793) AT5G04870 | Symbols: CPK1, ATCPK1 | CPK1 (CALCIUM DEPENDENT PROTEIN KINASE 1); calmodulin-dependent protein kinase/ kinase | chr5:1417015-1419877 REVERSEhighly similar to ( 665) CDPK_SOYBN Calcium-dependent protein kinase SK5 (EC 2.7.11.1) (CDPK) - Glycine max (Soybean)highly similar to ( 963) loc_os03g57450 12003.m10663 protein calcium-dependent protein kinase, isoform A…	9.28626e-62	1.87909e-59
GRMZM2G429118	GRMZM2G429118_T01	2.43211	44.486	213.731	10.3631	cell wall.precursor synthesis.GAE	highly similar to ( 513) AT3G23820 | Symbols: GAE6 | GAE6 (UDP-D-GLUCURONATE 4-EPIMERASE 6); UDP-glucuronate 4-epimerase/ catalytic | chr3:8603645-8605027 FORWARDvery weakly similar to (95.9) GALE1_PEA UDP-glucose 4-epimerase (EC 5.1.3.2) (Galactowaldenase) (UDP-galactose 4-epimerase) - Pisum sativum (Garden pea)highly similar to ( 684) loc_os09g32670 12009.m06354 protein protein capI, putative, …	2.84452e-73	8.88264e-71
GRMZM2G026188	GRMZM2G026188_T01	2.42877	9.72081	46.5616		not assigned.unknown	weakly similar to ( 189) loc_os05g50230 12005.m09092 protein expressed protein seq=cds; coord=6:166072020..166072887:-1; parent_gene=GRMZM2G026188	1.81716e-25	6.9853e-24
GRMZM2G026911	GRMZM2G026911_T01	2.41969	2.17954	10.3752	4.60463	RNA.regulation of transcription.unclassified	moderately similar to ( 379) AT5G02190 | Symbols: ATASP38, PCS1 | PCS1 (PROMOTION OF CELL SURVIVAL 1); aspartic-type endopeptidase/ peptidase | chr5:435322-436683 FORWARDhighly similar to ( 556) loc_os03g16500 12003.m35155 protein PCS1, putative, expressed seq=cds; coord=1:39756846..39758525:1; parent_gene=GRMZM2G026911	1.97124e-13	3.03657e-12
GRMZM2G319454	GRMZM2G319454_T01	2.41795	3.23857	15.3808	9.14517	not assigned.unknown	weakly similar to ( 117) loc_os05g09600 12005.m083642 protein expressed protein seq=cds; coord=2:111314923..111315856:1; parent_gene=GRMZM2G319454	1.99098e-11	2.48691e-10
GRMZM2G126541	GRMZM2G126541_T01	2.40844	1.17126	5.52839		protein.degradation.serine protease	moderately similar to ( 251) AT1G15000 | Symbols: scpl50 | scpl50 (serine carboxypeptidase-like 50); serine-type carboxypeptidase | chr1:5168613-5169947 FORWARDvery weakly similar to (88.6) CBP3_ORYSA Serine carboxypeptidase 3 precursor (EC 3.4.16.5) (Serine carboxypeptidase III) - Oryza sativa (Rice)moderately similar to ( 413) loc_os05g50570 12005.m09126 protein serine carboxypeptidase-like pre…	1.88018e-08	1.64161e-07
GRMZM2G024024	GRMZM2G024024_T01	2.40163	2.25188	10.5911		signalling.receptor kinases.misc	moderately similar to ( 296) AT2G33580 | Symbols: | protein kinase family protein / peptidoglycan-binding LysM domain-containing protein | chr2:14219848-14221842 REVERSEweakly similar to ( 160) CRI4_MAIZE Putative receptor protein kinase CRINKLY4 precursor (EC 2.7.11.1) - Zea mays (Maize)highly similar to ( 749) loc_os02g09960 12002.m06293 protein protein kinase, putative, expressed seq=cds; coor…	1.84691e-17	4.10508e-16
GRMZM2G061562	GRMZM2G061562_T01	2.40138	2.65616	12.4787	43.9184	not assigned.unknown	moderately similar to ( 364) AT1G74160 | Symbols: | unknown protein | chr1:27887164-27891151 FORWARDnearly identical (1175) loc_os07g01860 12007.m04664 protein expressed protein seq=cds; coord=7:50148619..50154496:1; parent_gene=GRMZM2G061562	6.63825e-28	3.11517e-26
GRMZM2G152587	GRMZM2G152587_T01	2.40089	0.892383	4.18731	1.26472	protein.degradation.AAA type	moderately similar to ( 293) AT3G28580 | Symbols: | AAA-type ATPase family protein | chr3:10715736-10717238 FORWARDhighly similar to ( 566) loc_os06g48240 12006.m09350 protein ATPase protein, putative, expressed seq=cds; coord=5:54533886..54535669:1; parent_gene=GRMZM2G152587	1.01106e-06	6.64768e-06
GRMZM2G083812	GRMZM2G083812_T01	2.4004	1.4612	6.86472	3.87409	not assigned.unknown	highly similar to ( 615) AT5G34940 | Symbols: AtGUS3 | AtGUS3 (Arabidopsis thaliana glucuronidase 3); beta-glucuronidase | chr5:13236566-13238718 REVERSEhighly similar to ( 883) loc_os02g55870 12002.m10611 protein heparanase-like protein 3 precursor, putative, expressed seq=cds; coord=5:214166462..214170119:1; parent_gene=GRMZM2G083812	1.72855e-12	2.40206e-11
AC234156.1	AC234156.1_FGT005	2.40003	64.8597	305.049	221.846	cell wall.cell wall proteins.AGPs.AGP	weakly similar to ( 184) AT2G04780 | Symbols: FLA7 | FLA7 (FASCICLIN-LIKE ARABINOOGALACTAN 7) | chr2:1677488-1678252 FORWARDmoderately similar to ( 218) loc_os09g30486 12009.m06208 protein fasciclin-like arabinogalactan protein 7 precursor, putative, expressed seq=cds; coord=4:198559982..198560791:-1; parent_gene=AC234156.1_FG005	7.49215e-62	1.52828e-59
GRMZM2G027726	GRMZM2G027726_T01	2.39852	14.0064	65.7385	12.4943	stress.biotic	moderately similar to ( 266) AT5G47120 | Symbols: ATBI-1, BI-1, ATBI1 | ATBI1 (BAX INHIBITOR 1) | chr5:19136071-19137585 FORWARDmoderately similar to ( 314) BI1_ORYSA Bax inhibitor 1 (BI-1) (OsBI-1) - Oryza sativa (Rice)moderately similar to ( 314) loc_os02g03280 12002.m33531 protein bax inhibitor 1, putative, expressed seq=cds; coord=4:238738850..238741055:1; parent_gene=GRMZM2G027726	2.60688e-37	2.02265e-35
GRMZM2G125516	GRMZM2G125516_T01	2.39825	8.73118	41.0378	245.419	protein.degradation	highly similar to ( 647) AT1G55360 | Symbols: | unknown protein | chr1:20666526-20668502 REVERSEhighly similar to ( 770) loc_os07g10530 12007.m05508 protein carboxyl-terminal peptidase, putative, expressed seq=cds; coord=7:17518655..17522588:1; parent_gene=GRMZM2G125516	2.05362e-38	1.68105e-36
GRMZM2G464572	GRMZM2G464572_T01	2.39768	0.474519	2.22658	10.568	protein.degradation.ubiquitin.E2	highly similar to ( 712) AT2G33770 | Symbols: UBC24, ATUBC24, PHO2 | PHO2 (PHOSPHATE 2); ubiquitin-protein ligase | chr2:14277785-14281482 REVERSEnearly identical (1310) loc_os05g48390 12005.m08910 protein ubiquitin conjugating enzyme, putative, expressed seq=cds; coord=9:56902708..56907334:-1; parent_gene=GRMZM2G464572	1.01106e-06	6.64768e-06
GRMZM2G104494	GRMZM2G104494_T01	2.38355	2.23777	10.3848		misc.protease inhibitor/seed storage/lipid transfer protein (LTP) family protein	very weakly similar to (95.1) AT3G22600 | Symbols: | protease inhibitor/seed storage/lipid transfer protein (LTP) family protein | chr3:8006711-8007397 REVERSEweakly similar to ( 124) loc_os07g07930 12007.m05253 protein lipid transfer protein, putative, expressed seq=cds; coord=1:160693408..160694403:-1; parent_gene=GRMZM2G104494	8.7335e-09	7.96341e-08
GRMZM2G382035	GRMZM2G382035_T01	2.37011	11.5715	53.2187	2.26723	not assigned.unknown	seq=cds; coord=8:109909762..109910614:-1; parent_gene=GRMZM2G382035	6.4869e-27	2.76694e-25
AC218972.3	AC218972.3_FGT002	2.36976	1.28013	5.88069		not assigned.unknown	moderately similar to ( 277) loc_os01g60420 12001.m12170 protein expressed protein seq=cds; coord=8:170627969..170629457:-1; parent_gene=AC218972.3_FG002	2.35875e-07	1.73689e-06
GRMZM2G176403	GRMZM2G176403_T01	2.36192	2.89984	13.258		stress.biotic	weakly similar to ( 105) AT3G46730 | Symbols: | disease resistance protein (CC-NBS class), putative | chr3:17213069-17215612 REVERSEmoderately similar to ( 321) loc_os12g09710 12012.m04955 protein NBS-LRR disease resistance protein, putative seq=cds; coord=7:140258657..140259754:1; parent_gene=GRMZM2G176403	8.18532e-12	1.06887e-10
GRMZM2G395508	GRMZM2G395508_T01	2.36122	123.3	561.837	55.3085	misc.UDP glucosyl and glucoronyl transferases	moderately similar to ( 215) AT3G16520 | Symbols: UGT88A1 | UDP-glucoronosyl/UDP-glucosyl transferase family protein | chr3:5618847-5620833 REVERSEweakly similar to ( 114) CZOG2_MAIZE Cis-zeatin O-glucosyltransferase 2 (EC 2.4.1.215) (cisZOG2) - Zea mays (Maize)highly similar to ( 530) loc_os07g31960 12007.m07462 protein anthocyanidin 3-O-glucosyltransferase, putative, expressed seq=cds; coord=7:…	1.44521e-80	5.80239e-78
GRMZM2G180775	GRMZM2G180775_T01	2.36065	10.3072	47.0432	12.9293	signalling.receptor kinases.misc	moderately similar to ( 246) AT1G33260 | Symbols: | protein kinase family protein | chr1:12064796-12066114 FORWARDweakly similar to ( 169) CRI4_MAIZE Putative receptor protein kinase CRINKLY4 precursor (EC 2.7.11.1) - Zea mays (Maize)moderately similar to ( 476) loc_os02g43290 12002.m09364 protein protein kinase APK1A, chloroplast precursor, putative, expressed seq=cds; coord=4:149834323..1498359…	3.23494e-34	2.11433e-32
GRMZM2G071478	GRMZM2G071478_T01	2.35226	3.49597	15.854		signalling.receptor kinases.misc	weakly similar to ( 197) AT2G33580 | Symbols: | protein kinase family protein / peptidoglycan-binding LysM domain-containing protein | chr2:14219848-14221842 REVERSEweakly similar to ( 118) KPRO_MAIZE Putative receptor protein kinase ZmPK1 precursor (EC 2.7.11.1) - Zea mays (Maize)highly similar to ( 662) loc_os11g35330 12011.m07385 protein protein kinase, putative, expressed seq=cds; coord=4:211…	2.32947e-23	7.83532e-22
GRMZM2G303775	GRMZM2G303775_T01	2.34823	9.30491	42.1569	14.4236	not assigned.unknown	very weakly similar to (93.6) AT4G28310 | Symbols: | unknown protein | chr4:14017458-14018066 FORWARDweakly similar to ( 151) loc_os06g02530 12006.m04986 protein expressed protein seq=cds; coord=9:25765011..25766105:1; parent_gene=GRMZM2G303775	8.04612e-27	3.41474e-25
GRMZM2G118766	GRMZM2G118766_T01	2.34506	21.7735	98.3229	18.8929	not assigned.unknown	weakly similar to ( 109) loc_os02g40820 12002.m77738 protein expressed protein seq=cds; coord=4:141601653..141602778:-1; parent_gene=GRMZM2G118766	4.26709e-44	4.59284e-42
GRMZM2G466298	GRMZM2G466298_T01	2.34308	5.93344	26.7474		misc.myrosinases-lectin-jacalin	moderately similar to ( 350) AT5G55830 | Symbols: | lectin protein kinase, putative | chr5:22594655-22596700 FORWARDweakly similar to ( 196) PSKR_DAUCA Phytosulfokine receptor precursor (EC 2.7.11.1) (Phytosulfokine LRR receptor kinase) - Daucus carota (Carrot)highly similar to ( 858) loc_os02g48210 12002.m09855 protein lectin-like protein kinase, putative, expressed seq=cds; coord=5:202294729..2…	5.22339e-44	5.55128e-42
GRMZM2G022253	GRMZM2G022253_T01	2.34177	8.82223	39.8042	68.1995	not assigned.unknown	seq=cds; coord=3:196090385..196091178:-1; parent_gene=GRMZM2G022253	2.56588e-20	7.10858e-19
GRMZM2G089783	GRMZM2G089783_T01	2.33687	98.5476	443.411	29.8232	signalling.G-proteins	weakly similar to ( 147) AT5G05380 | Symbols: PRA1.B3 | PRA1.B3 (PRENYLATED RAB ACCEPTOR 1.B3) | chr5:1592214-1592867 FORWARDmoderately similar to ( 224) loc_os11g01610 12011.m04364 protein prenylated Rab receptor 2, putative, expressed seq=cds; coord=4:183702618..183703995:1; parent_gene=GRMZM2G089783	3.01927e-72	9.09159e-70
GRMZM2G175499	GRMZM2G175499_T01	2.33687	10.4074	46.7606	32.1007	cell wall.pectin*esterases.PME	moderately similar to ( 438) AT3G43270 | Symbols: | pectinesterase family protein | chr3:15222402-15225124 REVERSEmoderately similar to ( 466) PME_PRUPE Pectinesterase PPE8B precursor (EC 3.1.1.11) (Pectin methylesterase) (PE) - Prunus persica (Peach)highly similar to ( 619) loc_os08g34900 12008.m07479 protein pectinesterase PPE8B precursor, putative, expressed seq=cds; coord=4:62334569..62340150…	1.05948e-39	9.20914e-38
GRMZM2G055052	GRMZM2G055052_T01	2.33641	66.1663	297.43		protein.degradation.ubiquitin.E3.RING	moderately similar to ( 230) AT5G37490 | Symbols: | U-box domain-containing protein | chr5:14887744-14889051 FORWARDweakly similar to ( 103) SPL11_ORYSA Spotted leaf protein 11 (Spotted leaf11) (Cell death-related protein SPL11) - Oryza sativa (Rice)highly similar to ( 545) loc_os03g13740 12003.m06818 protein immediate-early fungal elicitor protein CMPG1, putative, expressed seq=cds; coord=1:3222…	2.47816e-70	6.81333e-68
GRMZM2G136571	GRMZM2G136571_T01	2.33228	1.87296	8.38781	25.3857	not assigned.unknown	moderately similar to ( 422) AT4G24140 | Symbols: | hydrolase, alpha/beta fold family protein | chr4:12530032-12533664 REVERSEhighly similar to ( 605) loc_os06g04169 12006.m091587 protein catalytic/ hydrolase, putative, expressed seq=cds; coord=6:65299402..65301059:1; parent_gene=GRMZM2G136571	3.74985e-10	4.03955e-09
GRMZM2G428987	GRMZM2G428987_T01	2.33228	1.42568	6.38475		misc.nitrilases, *nitrile lyases, berberine bridge enzymes, reticuline oxidases, troponine reductases	weakly similar to ( 178) AT3G50440 | Symbols: ATMES10, MES10 | MES10 (METHYL ESTERASE 10); hydrolase/ hydrolase, acting on ester bonds / methyl jasmonate esterase | chr3:18717392-18718435 REVERSEmoderately similar to ( 352) PIR7A_ORYSA Probable esterase PIR7A (EC 3.1.-.-) - Oryza sativa (Rice)moderately similar to ( 352) loc_os01g70860 12001.m13131 protein esterase PIR7A, putative, expressed seq=…	3.74985e-10	4.03955e-09
GRMZM2G111394	GRMZM2G111394_T01	2.3316	6.3201	28.3184	1.32371	not assigned.unknown	moderately similar to ( 224) loc_os06g11150 12006.m05832 protein expressed protein seq=cds; coord=6:111557244..111558887:-1; parent_gene=GRMZM2G111394	1.43849e-24	5.22024e-23
GRMZM2G057328	GRMZM2G057328_T01	2.33077	40.3569	180.157	12.3032	secondary metabolism.flavonoids.dihydroflavonols	moderately similar to ( 382) AT1G15950 | Symbols: CCR1, IRX4, ATCCR1 | CCR1 (CINNAMOYL COA REDUCTASE 1); cinnamoyl-CoA reductase | chr1:5478855-5481949 FORWARDweakly similar to ( 189) DFRA_MAIZE Dihydroflavonol-4-reductase (EC 1.1.1.219) (DFR) (Dihydrokaempferol 4-reductase) - Zea mays (Maize)highly similar to ( 583) loc_os02g08420 12002.m06188 protein dihydroflavonol-4-reductase, putative, expre…	5.80351e-63	1.25465e-60
GRMZM2G128929	GRMZM2G128929_T01	2.32841	5.33017	23.8369	23.0086	fermentation.LDH	moderately similar to ( 445) AT4G17260 | Symbols: | L-lactate dehydrogenase, putative | chr4:9674057-9675309 FORWARDhighly similar to ( 620) LDH_MAIZE L-lactate dehydrogenase (EC 1.1.1.27) (LDH) - Zea mays (Maize)highly similar to ( 580) loc_os02g01510 12002.m05501 protein L-lactate dehydrogenase A, putative, expressed seq=cds; coord=5:67403566..67405443:1; parent_gene=GRMZM2G128929	4.20196e-23	1.39481e-21
GRMZM2G039757	GRMZM2G039757_T01	2.32446	25.5971	114.007	8.84811	not assigned.unknown	highly similar to ( 709) AT4G01870 | Symbols: | tolB protein-related | chr4:808473-810431 REVERSEnearly identical (1036) loc_os07g44410 12007.m08662 protein WD40-like Beta Propeller Repeat family protein, expressed seq=cds; coord=7:168744978..168747272:1; parent_gene=GRMZM2G039757	7.49673e-60	1.37407e-57
GRMZM2G119999	GRMZM2G119999_T01	2.32445	2.53296	11.2871		RNA.regulation of transcription.HB,Homeobox transcription factor family	weakly similar to ( 118) AT5G65310 | Symbols: ATHB5, ATHB-5 | ATHB5 (ARABIDOPSIS THALIANA HOMEOBOX PROTEIN 5); protein homodimerization/ sequence-specific DNA binding / transcription activator/ transcription factor | chr5:26102457-26103854 REVERSEmoderately similar to ( 236) loc_os10g23090 12010.m05314 protein homeodomain-leucine zipper transcription factor TaHDZipI-1, putative, expressed seq=cds…	4.47285e-14	7.33699e-13
GRMZM2G147756	GRMZM2G147756_T01	2.31876	43.6329	193.529	74.9105	cell wall.degradation.pectate lyases and polygalacturonases	highly similar to ( 568) AT1G70370 | Symbols: | BURP domain-containing protein / polygalacturonase, putative | chr1:26513003-26514998 REVERSEhighly similar to ( 933) loc_os08g29200 12008.m06924 protein polygalacturonase-1 non-catalytic beta subunit precursor, putative, expressed seq=cds; coord=4:72815461..72818160:1; parent_gene=GRMZM2G147756	1.13016e-69	3.00908e-67
GRMZM2G444819	GRMZM2G444819_T01	2.31433	32.4231	143.109		not assigned.unknown	seq=cds; coord=8:155974169..155975042:-1; parent_gene=GRMZM2G444819	7.65683e-46	9.05009e-44
GRMZM2G101872	GRMZM2G101872_T01	2.31399	5.18329	22.9406	16.8658	misc.plastocyanin-like	weakly similar to ( 107) AT3G20570 | Symbols: | plastocyanin-like domain-containing protein | chr3:7186754-7187453 REVERSEweakly similar to ( 178) loc_os02g06690 12002.m06017 protein blue copper protein precursor, putative, expressed seq=cds; coord=4:236727165..236728151:-1; parent_gene=GRMZM2G101872	3.60058e-14	5.97372e-13
GRMZM2G400173	GRMZM2G400173_T01	2.31374	2.48292	10.9872	22.9197	not assigned.unknown	nearly identical (1203) AT4G11610 | Symbols: | C2 domain-containing protein | chr4:7013956-7017846 REVERSEnearly identical (1734) loc_os07g30020 12007.m07273 protein phosphoribosylanthranilate transferase, putative, expressed seq=cds; coord=2:199457041..199462743:-1; parent_gene=GRMZM2G400173	1.83733e-24	6.60133e-23
GRMZM2G006212	GRMZM2G006212_T01	2.31222	2.03044	8.95735		transport.misc	moderately similar to ( 486) AT4G23030 | Symbols: | MATE efflux protein-related | chr4:12072857-12074365 FORWARDhighly similar to ( 774) loc_os04g48290 12004.m09766 protein antiporter/ drug transporter/ transporter, putative, expressed seq=cds; coord=10:136615140..136617256:-1; parent_gene=GRMZM2G006212	6.76553e-14	1.09137e-12
GRMZM2G106393	GRMZM2G106393_T01	2.31203	23.5395	103.845	24.8746	stress.abiotic.touch/wounding	very weakly similar to (92.0) AT4G10270 | Symbols: | wound-responsive family protein | chr4:6374805-6375077 FORWARDweakly similar to ( 124) loc_os04g54280 12004.m10320 protein retrotransposon protein, putative, unclassified seq=cds; coord=2:6981543..6982313:-1; parent_gene=GRMZM2G106393	1.26752e-36	9.4854e-35
GRMZM2G413044	GRMZM2G413044_T01	2.31104	25.7692	113.507	3.86877	cell wall.modification	moderately similar to ( 377) AT2G36870 | Symbols: | xyloglucan:xyloglucosyl transferase, putative / xyloglucan endotransglycosylase, putative / endo-xyloglucan transferase, putative | chr2:15472869-15474630 REVERSEmoderately similar to ( 218) XTH_TOBAC Probable xyloglucan endotransglucosylase/hydrolase protein precursor (EC 2.4.1.207) - Nicotiana tabacum (Common tobacco)highly similar to ( 537) l…	4.6169e-51	6.41648e-49
GRMZM2G179063	GRMZM2G179063_T01	2.30942	12.3036	53.9414		misc.UDP glucosyl and glucoronyl transferases	moderately similar to ( 273) AT2G36790 | Symbols: UGT73C6 | UGT73C6 (UDP-glucosyl transferase 73C6); UDP-glucosyltransferase/ UDP-glycosyltransferase/ quercetin 3-O-glucosyltransferase/ quercetin 4-O-glucosyltransferase/ quercetin 7-O-glucosyltransferase/ transferase, transferring glycosyl groups | chr2:15420339-15421826 REVERSEweakly similar to ( 127) IAAG_MAIZE Indole-3-acetate beta-glucosyltra…	1.15263e-39	9.95035e-38
GRMZM2G169966	GRMZM2G169966_T01	2.30888	11.3826	50.0284		RNA.regulation of transcription.WRKY domain transcription factor family	moderately similar to ( 294) AT2G38470 | Symbols: WRKY33, ATWRKY33 | WRKY33; transcription factor | chr2:16108476-16110539 FORWARDmoderately similar to ( 406) loc_os05g39720 12005.m08150 protein OsWRKY70 - Superfamily of rice TFs having WRKY and zinc finger domains, expressed seq=cds; coord=6:153264614..153267678:-1; parent_gene=GRMZM2G169966	1.85687e-41	1.74601e-39
GRMZM2G439350	GRMZM2G439350_T01	2.30721	12.3909	54.4412	2.01593	protein.postranslational modification	weakly similar to ( 176) AT4G26890 | Symbols: MAPKKK16 | MAPKKK16; ATP binding / kinase/ protein kinase/ protein serine/threonine kinase/ protein tyrosine kinase | chr4:13512072-13513406 FORWARDmoderately similar to ( 357) loc_os01g50370 12001.m11219 protein mitogen-activated protein kinase kinase kinase 1, putative, expressed seq=cds; coord=8:152959026..152960464:1; parent_gene=GRMZM2G439350	4.12124e-36	2.96987e-34
GRMZM2G321041	GRMZM2G321041_T01	2.30378	17.4126	76.6918	12.276	protein.degradation.ubiquitin.E3.RING	very weakly similar to (95.1) AT1G20823 | Symbols: | zinc finger (C3HC4-type RING finger) family protein | chr1:7238880-7239473 FORWARDweakly similar to ( 110) loc_os10g39450 12010.m06715 protein ring finger protein, putative, expressed seq=cds; coord=1:6217385..6218408:-1; parent_gene=GRMZM2G321041	6.82021e-36	4.88698e-34
AC197146.3	AC197146.3_FGT001	2.3032	2.43987	10.6937	19.7593	cell.division	highly similar to ( 609) AT3G25100 | Symbols: CDC45 | CDC45 (cell division cycle 45) | chr3:9144292-9146082 FORWARDhighly similar to ( 870) loc_os11g03430 12011.m04538 protein cell division control protein 45, putative, expressed seq=cds; coord=10:2480007..2481833:-1; parent_gene=AC197146.3_FG001	5.41917e-14	8.8263e-13
GRMZM2G089241	GRMZM2G089241_T01	2.30162	1.36486	5.98204		misc.UDP glucosyl and glucoronyl transferases	highly similar to ( 537) AT1G22360 | Symbols: AtUGT85A2 | AtUGT85A2 (UDP-glucosyl transferase 85A2); UDP-glycosyltransferase/ glucuronosyltransferase/ transferase, transferring glycosyl groups | chr1:7895068-7897527 REVERSEweakly similar to ( 196) IAAG_MAIZE Indole-3-acetate beta-glucosyltransferase (EC 2.4.1.121) (IAA-Glu synthetase) ((Uridine 5-diphosphate-glucose:indol-3-ylacetyl)-beta-D-gluco…	5.55401e-08	4.49978e-07
GRMZM2G018806	GRMZM2G018806_T01	2.29823	74.6525	326.399	9.58261	not assigned.unknown	very weakly similar to (80.1) AT2G01300 | Symbols: | unknown protein | chr2:151221-151691 REVERSEvery weakly similar to (84.3) loc_os01g03130 12001.m06952 protein expressed protein seq=cds; coord=3:25222480..25223219:1; parent_gene=GRMZM2G018806	1.79493e-57	3.00668e-55
GRMZM2G013010	GRMZM2G013010_T01	2.29625	11.0771	48.3505	11.9959	misc.GDSL-motif lipase	moderately similar to ( 276) AT5G45910 | Symbols: | GDSL-motif lipase/hydrolase family protein | chr5:18620420-18622264 REVERSEweakly similar to ( 153) EST_HEVBR Esterase precursor (EC 3.1.1.-) (Early nodule-specific protein homolog) (Latex allergen Hev b 13) - Hevea brasiliensis (Para rubber tree)moderately similar to ( 432) loc_os01g12320 12001.m42925 protein alpha-L-fucosidase 2 precursor, put…	7.3726e-31	4.01902e-29
GRMZM2G105364	GRMZM2G105364_T01	2.29536	41.5265	180.862	204.698	hormone metabolism.gibberelin.induced-regulated-responsive-activated	weakly similar to ( 122) AT3G10185 | Symbols: | Encodes a Gibberellin-regulated GASA/GAST/Snakin family protein | chr3:3145579-3146199 FORWARDweakly similar to ( 147) loc_os06g15620 12006.m06275 protein GAST1 protein precursor, putative, expressed seq=cds; coord=9:31907012..31908736:-1; parent_gene=GRMZM2G105364	1.23796e-60	2.35436e-58
GRMZM2G165966	GRMZM2G165966_T01	2.29534	7.39038	32.2325	10.1311	Co-factor and vitamine metabolism.molybdenum cofactor	weakly similar to ( 129) AT2G43760 | Symbols: | molybdopterin biosynthesis MoaE family protein | chr2:18133276-18133872 FORWARDweakly similar to ( 188) loc_os02g04740 12002.m05822 protein molybdenum cofactor synthesis protein 2 large subunit, putative, expressed seq=cds; coord=4:237711634..237712667:-1; parent_gene=GRMZM2G165966	8.4773e-21	2.42288e-19
GRMZM2G386817	GRMZM2G386817_T01	2.29371	3.56753	15.5595	19.186	not assigned.unknown	very weakly similar to (94.7) loc_os02g30600 12002.m08203 protein conserved hypothetical protein seq=cds; coord=5:163939951..163940664:-1; parent_gene=GRMZM2G386817	4.08501e-09	3.87716e-08
GRMZM2G162388	GRMZM2G162388_T01	2.29152	7.29166	31.6801	1.64033	cell.cycle.peptidylprolyl isomerase	moderately similar to ( 268) AT2G21130 | Symbols: | peptidyl-prolyl cis-trans isomerase / cyclophilin (CYP2) / rotamase | chr2:9055619-9056143 REVERSEmoderately similar to ( 304) CYPH_MAIZE Peptidyl-prolyl cis-trans isomerase (EC 5.2.1.8) (PPIase) (Rotamase) (Cyclophilin) (Cyclosporin A-binding protein) - Zea mays (Maize)moderately similar to ( 277) loc_os02g02890 12002.m05639 protein peptidyl-pr…	2.06312e-22	6.53941e-21
GRMZM2G397684	GRMZM2G397684_T01	2.29093	2.02308	8.8001	2.52062	protein.degradation.ubiquitin.E3.RING	very weakly similar to (97.1) AT3G61460 | Symbols: BRH1 | BRH1 (BRASSINOSTEROID-RESPONSIVE RING-H2); protein binding / zinc ion binding | chr3:22741701-22742213 REVERSEweakly similar to ( 152) loc_os04g49000 12004.m09835 protein RING zinc finger protein-like, putative, expressed seq=cds; coord=10:136006849..136007871:1; parent_gene=GRMZM2G397684	1.23271e-07	9.46575e-07
GRMZM2G106413	GRMZM2G106413_T01	2.27965	55.9657	240.635	65.9094	stress.abiotic.touch/wounding	very weakly similar to (94.7) AT4G10270 | Symbols: | wound-responsive family protein | chr4:6374805-6375077 FORWARDweakly similar to ( 109) loc_os04g54280 12004.m10320 protein retrotransposon protein, putative, unclassified seq=cds; coord=2:6979255..6979968:-1; parent_gene=GRMZM2G106413	5.37813e-51	7.43358e-49
GRMZM2G134064	GRMZM2G134064_T01	2.27887	2.3017	9.92329	2.7184	not assigned.unknown	very weakly similar to (87.0) loc_os03g22360 12003.m07638 protein expressed protein seq=cds; coord=9:130494459..130495288:-1; parent_gene=GRMZM2G134064	4.43702e-07	3.11059e-06
GRMZM2G178261	GRMZM2G178261_T01	2.27782	3.91742	16.9213	12.7421	RNA.regulation of transcription.General Transcription	weakly similar to ( 185) AT2G22840 | Symbols: AtGRF1 | AtGRF1 (GROWTH-REGULATING FACTOR 1); transcription activator | chr2:9728841-9731141 FORWARDhighly similar to ( 590) loc_os03g51970 12003.m10176 protein growth-regulating factor 1, putative, expressed seq=cds; coord=1:272348922..272353057:1; parent_gene=GRMZM2G178261	5.60433e-24	1.95795e-22
GRMZM2G474531	GRMZM2G474531_T01	2.2758	4.97066	21.3948	12.2608	cell.organisation	moderately similar to ( 458) AT3G01750 | Symbols: | ankyrin repeat family protein | chr3:270615-272691 FORWARDhighly similar to ( 729) loc_os05g23320 12005.m06627 protein expressed protein seq=cds; coord=5:163409583..163412899:1; parent_gene=GRMZM2G474531	8.13753e-27	3.44775e-25
GRMZM2G125653	GRMZM2G125653_T01	2.27549	3.78576	16.3015		RNA.regulation of transcription.WRKY domain transcription factor family	weakly similar to ( 172) AT1G80840 | Symbols: WRKY40, ATWRKY40 | WRKY40; transcription factor | chr1:30383834-30385356 FORWARDmoderately similar to ( 333) loc_os09g25060 12009.m05659 protein OsWRKY76 - Superfamily of rice TFs having WRKY and zinc finger domains, expressed seq=cds; coord=7:115308636..115310466:-1; parent_gene=GRMZM2G125653	2.99246e-17	6.51388e-16
GRMZM2G099619	GRMZM2G099619_T01	2.27165	28.9097	124.28		transport.ABC transporters and multidrug resistance systems	highly similar to ( 788) AT3G55090 | Symbols: | ATPase, coupled to transmembrane movement of substances | chr3:20416342-20418552 REVERSEweakly similar to ( 197) PDR15_ORYSA Pleiotropic drug resistance protein 15 - Oryza sativa (Rice)highly similar to ( 982) loc_os05g02890 12005.m04824 protein stigma/style ABC transporter, putative, expressed seq=cds; coord=6:31420492..31422903:1; parent_gene=GRMZ…	5.9721e-60	1.11072e-57
GRMZM2G449094	GRMZM2G449094_T01	2.27023	10.8744	46.5773		not assigned.unknown	weakly similar to ( 107) AT1G65690 | Symbols: | harpin-induced protein-related / HIN1-related / harpin-responsive protein-related | chr1:24431642-24432898 REVERSEmoderately similar to ( 230) loc_os04g58090 12004.m10691 protein NHL25, putative, expressed seq=cds; coord=2:1629928..1631025:1; parent_gene=GRMZM2G449094	1.89225e-27	8.45628e-26
GRMZM2G159404	GRMZM2G159404_T01	2.26777	1.5591	6.6696	13.7663	misc.UDP glucosyl and glucoronyl transferases	moderately similar to ( 297) AT5G12890 | Symbols: | UDP-glucoronosyl/UDP-glucosyl transferase family protein | chr5:4069658-4071124 REVERSEweakly similar to ( 164) CZOG1_MAIZE Cis-zeatin O-glucosyltransferase 1 (EC 2.4.1.215) (cisZOG1) - Zea mays (Maize)highly similar to ( 587) loc_os04g20474 12004.m101480 protein UDP-glycosyltransferase/ transferase, transferring glycosyl groups, putative, expre…	1.42552e-09	1.43141e-08
GRMZM2G082227	GRMZM2G082227_T01	2.26616	3.32688	14.245		RNA.regulation of transcription.ABI3/VP1-related B3-domain-containing transcription factor family	weakly similar to ( 189) AT2G46870 | Symbols: NGA1 | NGA1 (NGATHA1); transcription factor | chr2:19261313-19262245 FORWARDmoderately similar to ( 272) loc_os03g02900 12003.m05828 protein B3 DNA binding domain containing protein, expressed seq=cds; coord=1:4547696..4549322:1; parent_gene=GRMZM2G082227	1.68387e-15	3.17849e-14
GRMZM2G115660	GRMZM2G115660_T01	2.26492	4.11927	17.5906		protein.targeting.secretory pathway.vacuole	highly similar to ( 847) AT1G30900 | Symbols: | vacuolar sorting receptor, putative | chr1:10997275-11000543 FORWARDhighly similar to ( 786) VSR1_PEA Vacuolar sorting receptor 1 precursor (BP-80) (80 kDa proaleurein-binding protein) - Pisum sativum (Garden pea)nearly identical (1120) loc_os06g45380 12006.m32269 protein vacuolar sorting receptor 7 precursor, putative, expressed seq=cds; coord=9:10…	1.50051e-26	6.22194e-25
GRMZM2G107142	GRMZM2G107142_T01	2.26109	1.18166	5.04059	10.6571	not assigned.unknown	moderately similar to ( 280) AT2G17230 | Symbols: EXL5 | EXL5 (EXORDIUM LIKE 5) | chr2:7494892-7495983 REVERSEmoderately similar to ( 466) loc_os07g31430 12007.m07412 protein PHI-1, putative, expressed seq=cds; coord=7:150274745..150276226:-1; parent_gene=GRMZM2G107142	1.01106e-06	6.64768e-06
GRMZM2G137211	GRMZM2G137211_T01	2.25659	1.36428	5.80815	15.3513	DNA.synthesis/chromatin structure	highly similar to ( 600) AT2G42320 | Symbols: | nucleolar protein gar2-related | chr2:17628102-17630657 FORWARDnearly identical (1036) loc_os09g31230 12009.m22139 protein expressed protein seq=cds; coord=7:132805225..132810409:-1; parent_gene=GRMZM2G137211	1.82807e-12	2.53505e-11
GRMZM2G145753	GRMZM2G145753_T01	2.25183	0.990585	4.19975	21.2973	signalling.receptor kinases.leucine rich repeat XI	highly similar to ( 825) AT3G56370 | Symbols: | leucine-rich repeat transmembrane protein kinase, putative | chr3:20899403-20902390 REVERSEmoderately similar to ( 307) RPK1_IPONI Receptor-like protein kinase precursor (EC 2.7.11.1) - Ipomoea nil (Japanese morning glory) (Pharbitis nil)nearly identical (1326) loc_os01g60670 12001.m12195 protein receptor-like protein kinase precursor, putative, exp…	8.86786e-11	1.02939e-09
GRMZM2G174708	GRMZM2G174708_T01	2.25136	12.0721	51.1991	4.88833	cell wall.degradation.pectate lyases and polygalacturonases	weakly similar to ( 179) AT5G06870 | Symbols: PGIP2, ATPGIP2 | PGIP2 (POLYGALACTURONASE INHIBITING PROTEIN 2); protein binding | chr5:2133941-2135016 FORWARDweakly similar to ( 181) PGIP2_PHAVU Polygalacturonase inhibitor 2 precursor (Polygalacturonase-inhibiting protein) (PGIP-2) - Phaseolus vulgaris (Kidney bean) (French bean)moderately similar to ( 389) loc_os03g32180 12003.m08463 protein poly…	4.60692e-28	2.19036e-26
GRMZM2G034404	GRMZM2G034404_T01	2.25067	1.78442	7.56089		amino acid metabolism.misc	moderately similar to ( 420) AT1G12420 | Symbols: ACR8 | ACR8; amino acid binding | chr1:4226673-4228917 REVERSEhighly similar to ( 526) loc_os08g02500 12008.m04394 protein ACR8, putative seq=cds; coord=6:5641494..5643748:1; parent_gene=GRMZM2G034404	2.16148e-11	2.68925e-10
GRMZM2G322917	GRMZM2G322917_T01	2.24365	2.94428	12.3984	37.6825	not assigned.unknown	seq=cds; coord=1:57561578..57562334:1; parent_gene=GRMZM2G322917	1.38915e-07	1.05523e-06
GRMZM2G012970	GRMZM2G012970_T01	2.24229	1.12859	4.7525	38.6303	not assigned.unknown	weakly similar to ( 198) AT2G38370 | Symbols: | unknown protein | chr2:16072184-16074168 REVERSEhighly similar to ( 596) loc_os03g22040 12003.m07607 protein expressed protein seq=cds; coord=9:130918297..130920810:1; parent_gene=GRMZM2G012970	1.01814e-08	9.19416e-08
GRMZM2G042818	GRMZM2G042818_T01	2.23663	2.60986	10.932	24.6587	amino acid metabolism.degradation.aromatic aa.tryptophan	moderately similar to ( 472) AT1G06550 | Symbols: | enoyl-CoA hydratase/isomerase family protein | chr1:2003834-2006564 REVERSEhighly similar to ( 620) loc_os01g54860 12001.m11647 protein 3-hydroxyisobutyryl-CoA hydrolase/ catalytic, putative, expressed seq=cds; coord=3:198588979..198593726:-1; parent_gene=GRMZM2G042818	8.03893e-13	1.16259e-11
GRMZM2G475948	GRMZM2G475948_T01	2.22764	0.889392	3.70409	1.38515	misc.myrosinases-lectin-jacalin	highly similar to ( 726) AT2G37710 | Symbols: RLK | RLK (receptor lectin kinase); kinase | chr2:15814934-15816961 REVERSEmoderately similar to ( 210) PSKR_DAUCA Phytosulfokine receptor precursor (EC 2.7.11.1) (Phytosulfokine LRR receptor kinase) - Daucus carota (Carrot)highly similar to ( 844) loc_os04g44900 12004.m09446 protein lectin-like receptor kinase 7, putative, expressed seq=cds; coord=1:…	3.12849e-07	2.25898e-06
GRMZM2G435120	GRMZM2G435120_T01	2.22011	8.29653	34.3823		misc.UDP glucosyl and glucoronyl transferases	moderately similar to ( 372) AT2G22900 | Symbols: | galactosyl transferase GMA12/MNN10 family protein | chr2:9744359-9746193 REVERSEhighly similar to ( 530) loc_os11g34390 12011.m07297 protein glycosyltransferase 6, putative, expressed seq=cds; coord=4:190974285..190976011:1; parent_gene=GRMZM2G435120	5.11629e-29	2.54246e-27
GRMZM2G123143	GRMZM2G123143_T01	2.21844	1.30426	5.39418		not assigned.unknown	weakly similar to ( 114) loc_os01g24340 12001.m08902 protein expressed protein seq=cds; coord=8:40678212..40682507:-1; parent_gene=GRMZM2G123143	1.60457e-08	1.41415e-07
GRMZM2G316362	GRMZM2G316362_T01	2.21814	4.13372	17.0884	4.07733	lipid metabolism.FA synthesis and FA elongation.ACP desaturase	moderately similar to ( 492) AT1G43800 | Symbols: | acyl-(acyl-carrier-protein) desaturase, putative / stearoyl-ACP desaturase, putative | chr1:16577662-16579549 FORWARDmoderately similar to ( 495) STAD_CUCSA Acyl-[acyl-carrier-protein] desaturase, chloroplast precursor (EC 1.14.19.2) (Stearoyl-ACP desaturase) - Cucumis sativus (Cucumber)highly similar to ( 611) loc_os01g65830 12001.m12691 protei…	1.62016e-16	3.33444e-15
GRMZM2G153741	GRMZM2G153741_T01	2.21565	3.74783	15.4881	1.15469	cell wall.cell wall proteins.LRR	moderately similar to ( 201) AT3G22800 | Symbols: | leucine-rich repeat family protein / extensin family protein | chr3:8063063-8064475 REVERSEmoderately similar to ( 287) loc_os07g07990 12007.m05258 protein receptor protein kinase CLAVATA1 precursor, putative, expressed seq=cds; coord=7:9340555..9341531:-1; parent_gene=GRMZM2G153741	5.04085e-11	6.0143e-10
GRMZM2G039961	GRMZM2G039961_T01	2.21436	4.51635	18.6303		not assigned.unknown	seq=cds; coord=2:4571600..4572586:1; parent_gene=GRMZM2G039961	9.38176e-13	1.34373e-11
GRMZM2G008593	GRMZM2G008593_T01	2.20888	5.24119	21.5781	10.2799	cell wall.pectin*esterases.PME	moderately similar to ( 429) AT3G49220 | Symbols: | pectinesterase family protein | chr3:18249840-18253647 FORWARDmoderately similar to ( 353) PME_PRUPE Pectinesterase PPE8B precursor (EC 3.1.1.11) (Pectin methylesterase) (PE) - Prunus persica (Peach)highly similar to ( 552) loc_os02g18650 12002.m07108 protein pectinesterase-2 precursor, putative, expressed seq=cds; coord=5:129222210..129224687:-…	3.09505e-23	1.03553e-21
GRMZM2G178435	GRMZM2G178435_T01	2.20672	3.65018	15.005	15.7428	RNA.regulation of transcription.Chromatin Remodeling Factors	moderately similar to ( 463) AT3G24340 | Symbols: chr40 | chr40 (chromatin remodeling 40); ATP binding / DNA binding / helicase/ nucleic acid binding | chr3:8832085-8835722 REVERSEweakly similar to ( 103) ISW2_ORYSA Probable chromatin remodelling complex ATPase chain (EC 3.6.1.-) (ISW2-like) (Sucrose nonfermenting protein 2 homolog) - Oryza sativa (Rice)highly similar to ( 883) loc_os02g43460 120…	1.02133e-29	5.28295e-28
GRMZM2G121514	GRMZM2G121514_T01	2.2055	1.57625	6.46521	5.07711	not assigned.unknown	highly similar to ( 739) AT1G65590 | Symbols: HEXO3, ATHEX1 | HEXO3 (BETA-HEXOSAMINIDASE 3); beta-N-acetylhexosaminidase/ hexosaminidase | chr1:24385996-24390989 FORWARDhighly similar to ( 861) loc_os05g34320 12005.m64239 protein beta-hexosaminidase beta chain precursor, putative, expressed seq=cds; coord=6:147221316..147226156:1; parent_gene=GRMZM2G121514	1.57569e-10	1.77767e-09
GRMZM2G054900	GRMZM2G054900_T01	2.20543	21.6016	88.5321		signalling.calcium	moderately similar to ( 320) AT2G26190 | Symbols: | calmodulin-binding family protein | chr2:11147901-11150082 REVERSEmoderately similar to ( 396) loc_os01g38980 12001.m10178 protein calmodulin binding protein, putative, expressed seq=cds; coord=8:139711000..139713137:1; parent_gene=GRMZM2G054900	4.22495e-45	4.74444e-43
GRMZM2G300924	GRMZM2G300924_T01	2.20398	3.12597	12.8053		RNA.regulation of transcription.AP2/EREBP, APETALA2/Ethylene-responsive element binding protein family	weakly similar to ( 150) AT2G20880 | Symbols: | AP2 domain-containing transcription factor, putative | chr2:8986053-8987063 FORWARDvery weakly similar to (85.1) ERF5_TOBAC Ethylene-responsive transcription factor 5 (Ethylene-responsive element-binding factor 5 homolog) (EREBP-4) (NtERF4) - Nicotiana tabacum (Common tobacco)moderately similar to ( 275) loc_os04g44670 12004.m09426 protein AP2 domai…	2.49929e-17	5.48759e-16
GRMZM2G174558	GRMZM2G174558_T01	2.20264	41.5408	170.462	11.1592	not assigned.unknown	weakly similar to ( 127) AT1G28280 | Symbols: | VQ motif-containing protein | chr1:9886297-9887395 REVERSEweakly similar to ( 196) loc_os05g44270 12005.m08553 protein DNA-binding WRKY, putative, expressed seq=cds; coord=6:160717320..160718691:-1; parent_gene=GRMZM2G174558	2.67898e-53	3.85012e-51
GRMZM2G010306	GRMZM2G010306_T01	2.20022	2.23667	9.14955	18.315	misc.dynamin	nearly identical (1013) AT1G53140 | Symbols: | dynamin family protein | chr1:19799271-19802441 FORWARDnearly identical (1394) loc_os01g54420 12001.m11606 protein ATP binding protein, putative, expressed seq=cds; coord=3:197386891..197392522:-1; parent_gene=GRMZM2G010306	6.92678e-18	1.60298e-16
GRMZM2G151649	GRMZM2G151649_T01	2.19801	50.214	205.273	52.9505	protein.degradation.ubiquitin.E3.RING	moderately similar to ( 285) AT3G01400 | Symbols: | armadillo/beta-catenin repeat family protein | chr3:151920-152987 FORWARDweakly similar to ( 131) SPL11_ORYSA Spotted leaf protein 11 (Spotted leaf11) (Cell death-related protein SPL11) - Oryza sativa (Rice)moderately similar to ( 488) loc_os07g39880 12007.m08230 protein exodeoxyribonuclease V, putative, expressed seq=cds; coord=7:162003495..162…	9.46825e-59	1.64034e-56
GRMZM2G417954	GRMZM2G417954_T01	2.19324	52.6026	213.673		hormone metabolism.abscisic acid.synthesis-degradation.synthesis.9-cis-epoxycarotenoid dioxygenase	highly similar to ( 683) AT3G14440 | Symbols: NCED3, ATNCED3, STO1, SIS7 | NCED3 (NINE-CIS-EPOXYCAROTENOID DIOXYGENASE 3); 9-cis-epoxycarotenoid dioxygenase | chr3:4831678-4833477 REVERSEhighly similar to ( 841) loc_os07g05940 12007.m05058 protein viviparous-14, putative, expressed seq=cds; coord=7:5976197..5978481:1; parent_gene=GRMZM2G417954	8.35196e-63	1.79029e-60
GRMZM2G398198	GRMZM2G398198_T01	2.19072	6.36515	25.8465		protein.degradation.ubiquitin.E3.RING	moderately similar to ( 350) AT2G38970 | Symbols: | zinc finger (C3HC4-type RING finger) family protein | chr2:16274135-16276651 FORWARDhighly similar to ( 538) loc_os10g32760 12010.m06112 protein protein binding protein, putative, expressed seq=cds; coord=1:233813747..233815947:-1; parent_gene=GRMZM2G398198	6.92399e-28	3.23128e-26
GRMZM2G090328	GRMZM2G090328_T01	2.19043	32.6487	132.558	6.92493	protein.degradation.ubiquitin.E3.SCF.FBOX	weakly similar to ( 110) AT4G22030 | Symbols: | F-box family protein | chr4:11672396-11675575 FORWARDmoderately similar to ( 249) loc_os02g13220 12002.m06569 protein expressed protein seq=cds; coord=4:229315807..229317342:-1; parent_gene=GRMZM2G090328	9.45866e-51	1.30026e-48
GRMZM2G148200	GRMZM2G148200_T01	2.18854	65.1961	263.949	85.5168	transport.amino acids	nearly identical (1205) AT1G15690 | Symbols: AVP1, ATAVP3, AVP-3 | AVP1; ATPase/ hydrogen-translocating pyrophosphatase | chr1:5399115-5402185 FORWARDnearly identical (1279) AVP_HORVU Pyrophosphate-energized vacuolar membrane proton pump (EC 3.6.1.1) (Pyrophosphate-energized inorganic pyrophosphatase) (H(+)-PPase) - Hordeum vulgare (Barley)nearly identical (1307) loc_os06g08080 12006.m31844 prote…	1.30413e-68	3.366e-66
GRMZM2G309847	GRMZM2G309847_T01	2.18278	2.47922	10.0139		not assigned.unknown	seq=cds; coord=4:163649982..163650880:-1; parent_gene=GRMZM2G309847	3.4526e-07	2.47394e-06
GRMZM2G105682	GRMZM2G105682_T01	2.18139	2.78081	11.2082		misc.plastocyanin-like	very weakly similar to (95.5) AT2G32300 | Symbols: UCC1 | UCC1 (UCLACYANIN 1); copper ion binding / electron carrier | chr2:13722510-13723464 FORWARDweakly similar to ( 137) loc_os07g01440 12007.m04624 protein uclacyanin-2 precursor, putative, expressed seq=cds; coord=7:1137268..1138555:1; parent_gene=GRMZM2G105682	1.82199e-09	1.80586e-08
AC209356.4	AC209356.4_FGT001	2.17633	19.0803	76.7605		not assigned.unknown	seq=cds; coord=4:235888891..235889255:1; parent_gene=AC209356.4_FG001	8.93782e-14	1.42006e-12
GRMZM2G090594	GRMZM2G090594_T01	2.17513	15.6055	62.5352	5.22343	RNA.regulation of transcription.WRKY domain transcription factor family	weakly similar to ( 137) AT2G24570 | Symbols: WRKY17, ATWRKY17 | WRKY17; calmodulin binding / transcription factor | chr2:10437676-10439222 REVERSEweakly similar to ( 193) loc_os08g13840 12008.m26630 protein OsWRKY25 - Superfamily of rice TFs having WRKY and zinc finger domains, expressed seq=cds; coord=10:68725531..68726795:1; parent_gene=GRMZM2G090594	1.61792e-33	1.01046e-31
GRMZM2G129450	GRMZM2G129450_T01	2.1751	74.7329	299.371	40.2905	not assigned.unknown	seq=cds; coord=2:14896479..14897034:-1; parent_gene=GRMZM2G129450	1.07303e-46	1.31117e-44
GRMZM2G104942	GRMZM2G104942_T03	2.17387	1.60887	6.45235	7.36785	transport.membrane system unknown	highly similar to ( 577) AT3G47420 | Symbols: | glycerol-3-phosphate transporter, putative / glycerol 3-phosphate permease, putative | chr3:17472541-17474209 REVERSEhighly similar to ( 784) loc_os08g06010 12008.m04742 protein glycerol 3-phosphate permease, putative, expressed seq=cds; coord=4:33118428..33121982:-1; parent_gene=GRMZM2G104942	1.3187e-09	1.32942e-08
GRMZM2G447989	GRMZM2G447989_T01	2.16599	1.493	5.95616		signalling.receptor kinases.leucine rich repeat III	moderately similar to ( 468) AT3G20190 | Symbols: | leucine-rich repeat transmembrane protein kinase, putative | chr3:7044997-7047212 FORWARDweakly similar to ( 148) PSKR_DAUCA Phytosulfokine receptor precursor (EC 2.7.11.1) (Phytosulfokine LRR receptor kinase) - Daucus carota (Carrot)highly similar to ( 891) loc_os02g07810 12002.m06127 protein ATP binding protein, putative, expressed seq=cds; co…	5.98421e-09	5.56487e-08
GRMZM2G009690	GRMZM2G009690_T01	2.16525	1.41612	5.64943	8.82769	misc.UDP glucosyl and glucoronyl transferases	highly similar to ( 525) AT3G45400 | Symbols: | exostosin family protein | chr3:16651963-16653479 FORWARDhighly similar to ( 732) loc_os03g20850 12003.m07492 protein secondary cell wall-related glycosyltransferase family 47, putative, expressed seq=cds; coord=1:52464440..52467816:-1; parent_gene=GRMZM2G009690	5.98421e-09	5.56487e-08
AC220972.3	AC220972.3_FGT001	2.16409	3.3297	13.2703	8.00543	protein.degradation.ubiquitin.E3.RING	weakly similar to ( 143) loc_os01g20910 12001.m08575 protein RING-H2 finger protein ATL2L, putative, expressed seq=cds; coord=3:55475631..55476395:1; parent_gene=AC220972.3_FG001	1.06375e-07	8.2459e-07
GRMZM2G054065	GRMZM2G054065_T01	2.16197	3.06156	12.1839	4.76811	not assigned.unknown	seq=cds; coord=4:173181274..173182106:1; parent_gene=GRMZM2G054065	1.24835e-06	8.09222e-06
GRMZM2G137869	GRMZM2G137869_T01	2.16041	3.30174	13.1265		not assigned.unknown	weakly similar to ( 181) loc_os10g38880 12010.m06655 protein plant-specific domain TIGR01568 family protein, expressed seq=cds; coord=9:124964480..124965588:1; parent_gene=GRMZM2G137869	1.78569e-10	2.00298e-09
GRMZM2G143535	GRMZM2G143535_T01	2.15861	2.50711	9.95418	4.82217	DNA.repair	moderately similar to ( 340) AT3G12040 | Symbols: | DNA-3-methyladenine glycosylase (MAG) | chr3:3835349-3836781 REVERSEmoderately similar to ( 404) loc_os02g53430 12002.m10372 protein DNA-3-methyladenine glycosylase, putative, expressed seq=cds; coord=5:211439946..211442840:-1; parent_gene=GRMZM2G143535	4.28476e-09	4.05761e-08
GRMZM2G074792	GRMZM2G074792_T01	2.15845	11.5605	45.8789	3.4934	cell wall.cellulose synthesis	highly similar to ( 739) AT4G07960 | Symbols: ATCSLC12, CSLC12 | ATCSLC12 (CELLULOSE-SYNTHASE LIKE C12); cellulose synthase/ transferase, transferring glycosyl groups | chr4:4802628-4805114 REVERSEhighly similar to ( 854) loc_os05g43530 12005.m08480 protein CSLC7 - cellulose synthase-like family C, expressed seq=cds; coord=6:158222380..158226348:1; parent_gene=GRMZM2G074792	2.40982e-41	2.24922e-39
AC233865.1	AC233865.1_FGT004	2.15405	1.98441	7.85579		protein.degradation.ubiquitin.E3.RING	highly similar to ( 593) AT1G20780 | Symbols: PUB44, ATPUB44, SAUL1 | SAUL1 (SENESCENCE-ASSOCIATED E3 UBIQUITIN LIGASE 1); ubiquitin-protein ligase | chr1:7217812-7220609 FORWARDnearly identical (1115) loc_os12g17880 12012.m05744 protein ubiquitin-protein ligase, putative, expressed seq=cds; coord=7:146587604..146590486:1; parent_gene=AC233865.1_FG004	9.42429e-13	1.34905e-11
GRMZM2G059887	GRMZM2G059887_T01	2.15315	5.12765	20.2706	8.89852	not assigned.unknown	seq=cds; coord=5:138636469..138638958:-1; parent_gene=GRMZM2G059887	7.71622e-10	7.98911e-09
GRMZM2G130351	GRMZM2G130351_T01	2.15246	1.815	7.17505	11.9428	DNA.synthesis/chromatin structure	moderately similar to ( 405) AT1G67320 | Symbols: | DNA primase, large subunit family | chr1:25205520-25208966 REVERSEhighly similar to ( 550) loc_os07g22400 12007.m079652 protein DNA primase large subunit, putative, expressed seq=cds; coord=10:109484750..109488057:1; parent_gene=GRMZM2G130351	5.42902e-07	3.75298e-06
GRMZM2G409128	GRMZM2G409128_T01	2.14778	3.21471	12.6582	1.40527	RNA.regulation of transcription.Chromatin Remodeling Factors	moderately similar to ( 448) AT5G01710 | Symbols: | LOCATED IN: endomembrane system; EXPRESSED IN: sperm cell, male gametophyte, pollen tube; EXPRESSED DURING: L mature pollen stage, M germinated pollen stage; CONTAINS InterPro DOMAIN/s: Methyltransferase FkbM (InterPro:IPR006342); BEST Arabidopsis thaliana protein match is: methyltransferase (TAIR:AT4G24805.1); Has 224 Blast hits to 223 proteins…	1.03613e-16	2.15702e-15
GRMZM2G156599	GRMZM2G156599_T01	2.1401	2.19718	8.61035		transport.peptides and oligopeptides	highly similar to ( 805) AT5G24380 | Symbols: YSL2, ATYSL2 | YSL2 (YELLOW STRIPE LIKE 2); oligopeptide transporter | chr5:8324098-8326525 FORWARDhighly similar to ( 962) loc_os04g45900 12004.m09541 protein transposon protein, putative, unclassified, expressed seq=cds; coord=5:190674766..190677896:-1; parent_gene=GRMZM2G156599	6.26842e-14	1.01377e-12
GRMZM2G464013	GRMZM2G464013_T01	2.13892	30.7839	120.554	27.3441	not assigned.unknown	weakly similar to ( 129) AT5G05950 | Symbols: MEE60 | MEE60 (maternal effect embryo arrest 60) | chr5:1788814-1789341 FORWARDmoderately similar to ( 217) loc_os07g13600 12007.m05806 protein expressed protein seq=cds; coord=2:157799896..157800950:1; parent_gene=GRMZM2G464013	6.04796e-41	5.54265e-39
GRMZM2G359298	GRMZM2G359298_T01	2.13779	2.85071	11.1469		misc.oxidases - copper, flavone etc.	highly similar to ( 873) AT4G12290 | Symbols: | amine oxidase/ copper ion binding / quinone binding | chr4:7304434-7306973 FORWARDhighly similar to ( 526) AMO_PEA Amine oxidase [copper-containing] precursor (EC 1.4.3.6) - Pisum sativum (Garden pea)highly similar to ( 744) loc_os04g20164 12004.m101827 protein amine oxidase precursor, putative, expressed seq=cds; coord=10:103630422..103635991:-1; p…	9.79701e-19	2.43185e-17
GRMZM2G141517	GRMZM2G141517_T01	2.13746	1.36874	5.35208	71.0117	signalling.receptor kinases.leucine rich repeat XI	nearly identical (1253) AT5G65700 | Symbols: BAM1 | BAM1 (BARELY ANY MERISTEM 1); ATP binding / kinase/ protein serine/threonine kinase | chr5:26281826-26284945 FORWARDmoderately similar to ( 487) RPK1_IPONI Receptor-like protein kinase precursor (EC 2.7.11.1) - Ipomoea nil (Japanese morning glory) (Pharbitis nil)nearly identical (1494) loc_os07g04190 12007.m04888 protein receptor protein kinase …	4.30521e-13	6.41697e-12
GRMZM2G305124	GRMZM2G305124_T01	2.1361	4.37667	17.1138	12.0456	RNA.regulation of transcription.SET-domain transcriptional regulator family	moderately similar to ( 394) AT5G24330 | Symbols: ATXR6, SDG34 | ATXR6; DNA binding / protein binding | chr5:8295245-8296997 REVERSEmoderately similar to ( 494) loc_os02g03030 12002.m05653 protein histone-lysine N-methyltransferase ATXR6, putative, expressed seq=cds; coord=5:71843738..71845004:1; parent_gene=GRMZM2G305124	4.30521e-13	6.41697e-12
GRMZM2G113241	GRMZM2G113241_T01	2.13046	3.14335	12.2356	21.1513	not assigned.unknown	very weakly similar to (81.6) AT5G49800 | Symbols: | FUNCTIONS IN: molecular_function unknown; INVOLVED IN: biological_process unknown; EXPRESSED IN: 12 plant structures; EXPRESSED DURING: 4 anthesis, F mature embryo stage, C globular stage, petal differentiation and expansion stage, D bilateral stage; CONTAINS InterPro DOMAIN/s: Lipid-binding START (InterPro:IPR002913); Has 156 Blast hits to 155…	4.4014e-08	3.62753e-07
GRMZM2G077400	GRMZM2G077400_T01	2.12449	12.0742	46.8096	67.4526	not assigned.unknown	seq=cds; coord=3:174822792..174823147:1; parent_gene=GRMZM2G077400	2.12219e-11	2.64297e-10
GRMZM2G132682	GRMZM2G132682_T01	2.12361	2.93308	11.371	8.74267	not assigned.unknown	weakly similar to ( 139) AT5G14360 | Symbols: | ubiquitin family protein | chr5:4631038-4631641 FORWARDweakly similar to ( 184) loc_os02g38410 12002.m08929 protein BCL-2 binding anthanogene-1, putative, expressed seq=cds; coord=4:132549640..132551297:1; parent_gene=GRMZM2G132682	3.10023e-08	2.60695e-07
GRMZM2G334336	GRMZM2G334336_T01	2.12174	3.192	12.3615	4.24111	misc.UDP glucosyl and glucoronyl transferases	moderately similar to ( 316) AT1G05680 | Symbols: | UDP-glucoronosyl/UDP-glucosyl transferase family protein | chr1:1703196-1704639 REVERSEmoderately similar to ( 295) IAAG_MAIZE Indole-3-acetate beta-glucosyltransferase (EC 2.4.1.121) (IAA-Glu synthetase) ((Uridine 5-diphosphate-glucose:indol-3-ylacetyl)-beta-D-glucosyl transferase) - Zea mays (Maize)highly similar to ( 609) loc_os04g12970 12004…	1.05933e-12	1.50914e-11
GRMZM2G101116	GRMZM2G101116_T01	2.12079	1.54137	5.96087		signalling.G-proteins	moderately similar to ( 274) AT2G43120 | Symbols: | pirin, putative | chr2:17927339-17928871 FORWARDmoderately similar to ( 434) loc_os08g27720 12008.m06782 protein pirin-like protein, putative, expressed seq=cds; coord=1:220784972..220788333:-1; parent_gene=GRMZM2G101116	8.52102e-07	5.68383e-06
GRMZM2G088169	GRMZM2G088169_T01	2.12035	52.3008	201.915		not assigned.unknown	very weakly similar to (99.4) loc_os11g32070 12011.m07109 protein LGC1, putative seq=cds; coord=4:23184479..23185123:1; parent_gene=GRMZM2G088169	2.64986e-38	2.14825e-36
GRMZM2G364208	GRMZM2G364208_T01	2.11368	32.9433	126.619	2.11261	not assigned.unknown	very weakly similar to (85.1) loc_os05g50100 12005.m09079 protein expressed protein seq=cds; coord=6:165938508..165939575:-1; parent_gene=GRMZM2G364208	2.45864e-41	2.28635e-39
GRMZM2G062577	GRMZM2G062577_T01	2.10632	13.863	53.1584	25.4419	misc.GDSL-motif lipase	moderately similar to ( 402) AT1G71691 | Symbols: | GDSL-motif lipase/hydrolase family protein | chr1:26949395-26951173 REVERSEweakly similar to ( 147) APG_BRANA Anter-specific proline-rich protein APG (Protein CEX) (Fragment) - Brassica napus (Rape)highly similar to ( 554) loc_os05g34700 12005.m27828 protein anther-specific proline-rich protein APG, putative, expressed seq=cds; coord=6:147690396…	8.28598e-35	5.60389e-33
GRMZM2G088613	GRMZM2G088613_T01	2.10607	2.56859	9.82745		DNA.synthesis/chromatin structure	weakly similar to ( 195) AT3G18950 | Symbols: | transducin family protein / WD-40 repeat family protein | chr3:6536900-6538321 FORWARDmoderately similar to ( 253) loc_os12g40260 12012.m07810 protein nucleotide binding protein, putative, expressed seq=cds; coord=1:166060337..166065479:1; parent_gene=GRMZM2G088613	1.85199e-17	4.10914e-16
GRMZM2G141322	GRMZM2G141322_T01	2.10604	33.7927	129.743	2.28059	RNA.processing.ribonucleases	moderately similar to ( 206) AT2G02990 | Symbols: RNS1, ATRNS1 | RNS1 (RIBONUCLEASE 1); endoribonuclease/ ribonuclease | chr2:873714-874667 FORWARDvery weakly similar to (80.9) RN28_PANGI Ribonuclease-like storage protein precursor (Root 28 kDa major protein) - Panax ginseng (Korean ginseng)moderately similar to ( 323) loc_os07g43670 12007.m08593 protein ribonuclease 1 precursor, putative, expres…	2.21434e-41	2.07442e-39
GRMZM2G471517	GRMZM2G471517_T01	2.10495	21.8627	83.855	8.1695	not assigned.unknown	seq=cds; coord=3:22956305..22957389:1; parent_gene=GRMZM2G471517	5.99057e-34	3.83609e-32
GRMZM2G082007	GRMZM2G082007_T01	2.10426	17.5884	67.2079	94.9855	secondary metabolism.phenylpropanoids.lignin biosynthesis.COMT	moderately similar to ( 388) AT3G53140 | Symbols: | O-diphenol-O-methyl transferase, putative | chr3:19695692-19697355 FORWARDmoderately similar to ( 210) COMT1_SACOF Caffeic acid 3-O-methyltransferase (EC 2.1.1.68) (S-adenosysl-L-methionine:caffeic acid 3-O-methyltransferase) (COMT) (CAOMT) - Saccharum officinarum (Sugarcane)highly similar to ( 551) loc_os02g57760 12002.m10797 protein caffeic ac…	8.20985e-42	7.8659e-40
GRMZM2G176375	GRMZM2G176375_T01	2.10293	11.1309	42.4671		not assigned.unknown	seq=cds; coord=2:233627184..233628270:-1; parent_gene=GRMZM2G176375	3.15096e-23	1.05146e-21
GRMZM2G361210	GRMZM2G361210_T01	2.10258	278.359	1062.96	4.52592	RNA.regulation of transcription.C2H2 zinc finger family	weakly similar to ( 131) loc_os03g60570 12003.m10946 protein zinc finger DNA-binding protein, putative, expressed seq=cds; coord=1:293158302..293159120:1; parent_gene=GRMZM2G361210	1.07063e-64	2.4179e-62
AC234203.1	AC234203.1_FGT004	2.09996	4.50202	17.1454	19.9883	transport.ABC transporters and multidrug resistance systems	nearly identical (1592) AT3G59140 | Symbols: ATMRP14 | ATMRP14; ATPase, coupled to transmembrane movement of substances | chr3:21863519-21868701 REVERSEweakly similar to ( 195) MDR_ORYSA Putative multidrug resistance protein (P-glycoprotein) - Oryza sativa (Rice)nearly identical (2150) loc_os06g06440 12006.m05369 protein multidrug resistance-associated protein 14, putative, expressed seq=cds; coo…	1.99868e-31	1.12647e-29
GRMZM2G013546	GRMZM2G013546_T01	2.09992	2.92462	11.1682	24.2	not assigned.unknown	weakly similar to ( 163) loc_os11g30430 12011.m06952 protein expressed protein seq=cds; coord=4:17375133..17376384:-1; parent_gene=GRMZM2G013546	9.53338e-10	9.78642e-09
GRMZM5G812272	GRMZM5G812272_T02	2.09886	6.42738	24.5079		RNA.regulation of transcription.WRKY domain transcription factor family	weakly similar to ( 163) AT4G18170 | Symbols: WRKY28, ATWRKY28 | WRKY28; transcription factor | chr4:10061508-10062691 FORWARDmoderately similar to ( 233) loc_os01g47560 12001.m10951 protein OsWRKY16 - Superfamily of rice TFs having WRKY and zinc finger domains, expressed seq=cds; coord=8:149077318..149080011:-1; parent_gene=GRMZM5G812272	5.91696e-21	1.7046e-19
GRMZM2G083538	GRMZM2G083538_T01	2.09798	12.1093	46.0216		not assigned.unknown	moderately similar to ( 365) AT1G69040 | Symbols: ACR4 | ACR4 (ACT REPEAT 4); amino acid binding | chr1:25957843-25960079 FORWARDhighly similar to ( 590) loc_os08g42080 12008.m08186 protein ACR5, putative, expressed seq=cds; coord=1:194674440..194677737:1; parent_gene=GRMZM2G083538	4.03326e-36	2.91478e-34
GRMZM2G132704	GRMZM2G132704_T01	2.09638	1.46865	5.58371	3.98445	DNA.synthesis/chromatin structure	highly similar to ( 546) AT2G42320 | Symbols: | nucleolar protein gar2-related | chr2:17628102-17630657 FORWARDhighly similar to ( 977) loc_os08g39490 12008.m080206 protein expressed protein seq=cds; coord=1:187635249..187640520:1; parent_gene=GRMZM2G132704	3.31302e-10	3.58885e-09
GRMZM2G089850	GRMZM2G089850_T01	2.09625	7.91608	30.0844	12.2112	RNA.regulation of transcription.C2C2(Zn) DOF zinc finger family	very weakly similar to (96.3) AT3G21270 | Symbols: ADOF2 | ADOF2; DNA binding / transcription factor | chr3:7474934-7475548 FORWARDweakly similar to ( 127) MNB1A_MAIZE Dof zinc finger protein MNB1A - Zea mays (Maize)weakly similar to ( 140) loc_os09g29960 12009.m06147 protein dof zinc finger protein MNB1A, putative, expressed seq=cds; coord=7:130360893..130362159:-1; parent_gene=GRMZM2G089850	1.52661e-20	4.3096e-19
GRMZM2G013430	GRMZM2G013430_T01	2.09452	5.12848	19.43	2.76152	amino acid metabolism.synthesis.serine-glycine-cysteine group.cysteine.SAT	moderately similar to ( 218) AT1G55920 | Symbols: ATSERAT2;1, SAT5, SAT1 | ATSERAT2;1 (SERINE ACETYLTRANSFERASE 2;1); serine O-acetyltransferase | chr1:20912378-20913322 FORWARDmoderately similar to ( 331) loc_os03g10050 12003.m06459 protein serine acetyltransferase 1, putative, expressed seq=cds; coord=1:24050823..24052281:1; parent_gene=GRMZM2G013430	9.75989e-17	2.03517e-15
AC233853.1	AC233853.1_FGT002	2.09405	3.48884	13.2555	2.60239	RNA.regulation of transcription.bZIP transcription factor family	moderately similar to ( 273) AT3G58120 | Symbols: ATBZIP61, BZIP61 | BZIP61; DNA binding / transcription activator/ transcription factor | chr3:21521289-21523078 REVERSEvery weakly similar to (98.2) RF2B_ORYSA Transcription factor RF2b - Oryza sativa (Rice)moderately similar to ( 318) loc_os01g11350 12001.m07754 protein transcription factor RF2b, putative, expressed seq=cds; coord=3:3820868..3822…	3.34646e-08	2.80097e-07
GRMZM2G098869	GRMZM2G098869_T01	2.09352	2.12612	8.06169	4.76116	not assigned.unknown	highly similar to ( 593) AT4G37170 | Symbols: | pentatricopeptide (PPR) repeat-containing protein | chr4:17498580-17500655 REVERSEvery weakly similar to (82.0) RF1_ORYSA Rf1 protein, mitochondrial precursor (PPR protein) (Fertility restorer) (Restorer for CMS) - Oryza sativa (Rice)highly similar to ( 934) loc_os03g13230 12003.m06769 protein CRR2, putative, expressed seq=cds; coord=9:144304513..14…	7.19511e-13	1.04474e-11
GRMZM2G141288	GRMZM2G141288_T01	2.09321	2.48295	9.43069	9.31487	signalling.receptor kinases.leucine rich repeat III	moderately similar to ( 485) AT2G23300 | Symbols: | leucine-rich repeat transmembrane protein kinase, putative | chr2:9914608-9917130 FORWARDweakly similar to ( 115) PSKR_DAUCA Phytosulfokine receptor precursor (EC 2.7.11.1) (Phytosulfokine LRR receptor kinase) - Daucus carota (Carrot)highly similar to ( 963) loc_os06g43170 12006.m08847 protein transposon protein, putative, unclassified, expresse…	2.1329e-17	4.70764e-16
GRMZM2G478553	GRMZM2G478553_T01	2.09307	174.903	663.839	26.3158	protein.degradation.ubiquitin.E3.RING	weakly similar to ( 119) AT1G53820 | Symbols: | zinc finger (C3HC4-type RING finger) family protein | chr1:20091491-20092423 FORWARDweakly similar to ( 102) EL5_ORYSA E3 ubiquitin-protein ligase EL5 (EC 6.3.2.-) - Oryza sativa (Rice)moderately similar to ( 220) loc_os06g09310 12006.m05650 protein znf, putative, expressed seq=cds; coord=9:11731247..11733071:-1; parent_gene=GRMZM2G478553	1.0735e-65	2.51418e-63
GRMZM2G029048	GRMZM2G029048_T01	2.08942	200.679	760.813	84.3476	secondary metabolism.phenylpropanoids.lignin biosynthesis.PAL	nearly identical (1042) AT2G37040 | Symbols: pal1, ATPAL1 | pal1 (Phe ammonia lyase 1); phenylalanine ammonia-lyase | chr2:15557602-15560237 REVERSEnearly identical (1189) PAL2_ORYSA Phenylalanine ammonia-lyase (EC 4.3.1.5) - Oryza sativa (Rice)nearly identical (1288) loc_os02g41650 12002.m33781 protein phenylalanine ammonia-lyase, putative, expressed seq=cds; coord=5:186726200..186730209:-1; par…	4.73131e-67	1.17327e-64
GRMZM2G128268	GRMZM2G128268_T01	2.08926	911.7	3441.66	160.57	protein.degradation.aspartate protease	moderately similar to ( 348) AT1G44130 | Symbols: | nucellin protein, putative | chr1:16787508-16789318 REVERSEmoderately similar to ( 391) ASP1_ORYSA Aspartic proteinase Asp1 precursor (EC 3.4.23.-) (OsAsp1) (OSAP1) (Nucellin-like protein) - Oryza sativa (Rice)highly similar to ( 635) loc_os11g08100 12011.m05006 protein aspartic proteinase Asp1 precursor, putative, expressed seq=cds; coord=2:130…	9.97883e-69	2.60211e-66
GRMZM2G420883	GRMZM2G420883_T01	2.08809	332.127	1253.99	13.4963	not assigned.unknown	seq=cds; coord=6:121076930..121077741:-1; parent_gene=GRMZM2G420883	1.08207e-64	2.42211e-62
GRMZM2G051005	GRMZM2G051005_T01	2.07736	12.626	47.4002	10.3789	secondary metabolism.phenylpropanoids	moderately similar to ( 338) AT5G48930 | Symbols: HCT | HCT (HYDROXYCINNAMOYL-COA SHIKIMATE/QUINATE HYDROXYCINNAMOYL TRANSFERASE); quinate O-hydroxycinnamoyltransferase/ shikimate O-hydroxycinnamoyltransferase/ transferase | chr5:19836654-19838092 REVERSEmoderately similar to ( 271) HCBT1_DIACA Anthranilate N-benzoyltransferase protein 1 (EC 2.3.1.144) (Anthranilate N-hydroxycinnamoyl/benzoyltran…	1.99963e-31	1.12647e-29
GRMZM2G117627	GRMZM2G117627_T01	2.07446	1.77878	6.65821		lipid metabolism.lipid degradation.lipases.triacylglycerol lipase	moderately similar to ( 406) AT1G05800 | Symbols: DGL | DGL (DONGLE); triacylglycerol lipase | chr1:1741204-1742619 FORWARDhighly similar to ( 610) loc_os11g19340 12011.m06008 protein triacylglycerol lipase, putative, expressed seq=cds; coord=4:16984002..16985612:1; parent_gene=GRMZM2G117627	7.38898e-08	5.88467e-07
GRMZM2G016264	GRMZM2G016264_T01	2.07215	6.47399	24.1641	1.93633	misc.cytochrome P450	moderately similar to ( 493) AT2G27690 | Symbols: CYP94C1 | CYP94C1; fatty acid (omega-1)-hydroxylase/ oxygen binding | chr2:11809373-11810860 FORWARDvery weakly similar to (92.4) C97B2_SOYBN Cytochrome P450 97B2 (EC 1.14.-.-) - Glycine max (Soybean)highly similar to ( 736) loc_os11g05380 12011.m04735 protein cytochrome P450 94A2, putative, expressed seq=cds; coord=10:5398299..5400462:1; parent_g…	1.27126e-24	4.6467e-23
GRMZM2G025491	GRMZM2G025491_T01	2.07017	1.76374	6.58951	1.22164	RNA.regulation of transcription.unclassified	moderately similar to ( 215) AT2G03200 | Symbols: | aspartyl protease family protein | chr2:966506-967891 REVERSEmoderately similar to ( 466) loc_os06g10670 12006.m05785 protein aspartic proteinase nepenthesin-1 precursor, putative, expressed seq=cds; coord=6:109385420..109387134:1; parent_gene=GRMZM2G025491	5.12925e-08	4.18649e-07
GRMZM2G174732	GRMZM2G174732_T01	2.06898	1.65146	6.15956		secondary metabolism.phenylpropanoids.lignin biosynthesis.4CL	highly similar to ( 532) AT1G51680 | Symbols: 4CL1, 4CL.1, AT4CL1 | 4CL1 (4-COUMARATE:COA LIGASE 1); 4-coumarate-CoA ligase | chr1:19159080-19161464 REVERSEhighly similar to ( 768) 4CL1_ORYSA 4-coumarate--CoA ligase 1 (EC 6.2.1.12) (4CL 1) (4-coumaroyl-CoA synthase 1) - Oryza sativa (Rice)highly similar to ( 768) loc_os08g14760 12008.m05599 protein 4-coumarate--CoA ligase 1, putative, expressed s…	2.33738e-08	2.00684e-07
GRMZM2G119168	GRMZM2G119168_T01	2.06732	29.6312	110.658	10.9663	RNA.regulation of transcription.putative transcription regulator	weakly similar to ( 141) AT2G45430 | Symbols: | DNA-binding protein-related | chr2:18727848-18728801 FORWARDmoderately similar to ( 258) loc_os03g16350 12003.m07070 protein DNA-binding protein, putative, expressed seq=cds; coord=1:39332349..39333847:1; parent_gene=GRMZM2G119168	5.22941e-43	5.26983e-41
GRMZM2G079928	GRMZM2G079928_T01	2.06587	1.29432	4.82008		minor CHO metabolism.trehalose.potential TPS/TPP	highly similar to ( 745) AT2G18700 | Symbols: ATTPS11, TPS11, ATTPSB | ATTPS11; transferase, transferring glycosyl groups | chr2:8109043-8111799 FORWARDnearly identical (1055) loc_os08g34580 12008.m26506 protein trehalose-6-phosphate synthase, putative, expressed seq=cds; coord=1:210663759..210667488:-1; parent_gene=GRMZM2G079928	1.63302e-08	1.43872e-07
GRMZM2G081529	GRMZM2G081529_T01	2.06539	6.05551	22.5621	14.8309	not assigned.unknown	seq=cds; coord=2:187881831..187882645:-1; parent_gene=GRMZM2G081529	1.43903e-11	1.83185e-10
AC204712.3	AC204712.3_FGT002	2.06507	15.0278	55.9372	29.4751	not assigned.unknown	seq=cds; coord=3:199983675..199984303:-1; parent_gene=AC204712.3_FG002	3.04114e-12	4.12896e-11
GRMZM2G031624	GRMZM2G031624_T01	2.05774	4.10463	15.1682		protein.degradation.ubiquitin.E3.RING	very weakly similar to (93.6) AT2G35930 | Symbols: PUB23 | PUB23 (PLANT U-BOX 23); ubiquitin-protein ligase | chr2:15083101-15084336 REVERSEvery weakly similar to (89.4) SPL11_ORYSA Spotted leaf protein 11 (Spotted leaf11) (Cell death-related protein SPL11) - Oryza sativa (Rice)weakly similar to ( 171) loc_os12g06410 12012.m04631 protein ubiquitin-protein ligase, putative, expressed seq=cds; coor…	7.87943e-11	9.19292e-10
GRMZM2G018275	GRMZM2G018275_T01	2.05698	5.48576	20.3505	10.4125	not assigned.unknown	weakly similar to ( 179) AT4G39730 | Symbols: | lipid-associated family protein | chr4:18432950-18433581 FORWARDmoderately similar to ( 278) loc_os04g38390 12004.m08829 protein wound/stress protein, putative, expressed seq=cds; coord=2:43117505..43119018:-1; parent_gene=GRMZM2G018275	7.25225e-16	1.41324e-14
GRMZM2G126572	GRMZM2G126572_T01	2.05632	3.01644	11.1565	3.84527	not assigned.unknown	moderately similar to ( 278) loc_os02g46420 12002.m09679 protein transposon protein, putative, unclassified, expressed seq=cds; coord=5:198033435..198034859:-1; parent_gene=GRMZM2G126572	1.07425e-10	1.23622e-09
GRMZM2G013949	GRMZM2G013949_T01	2.05311	2.44674	9.02762		not assigned.unknown	seq=cds; coord=4:196467023..196467998:1; parent_gene=GRMZM2G013949	1.39935e-06	8.9767e-06
GRMZM2G126936	GRMZM2G126936_T01	2.05215	1.96707	7.25779	1.32753	RNA.regulation of transcription.NAC domain transcription factor family	weakly similar to ( 101) AT5G08790 | Symbols: ATAF2, anac081 | ATAF2; transcription activator | chr5:2859113-2860144 REVERSEweakly similar to ( 129) NAC67_ORYSA NAC domain-containing protein 67 (ONAC067) - Oryza sativa (Rice)moderately similar to ( 233) loc_os03g60080 12003.m10901 protein NAC domain-containing protein 67, putative, expressed seq=cds; coord=9:145843393..145844700:-1; parent_gene=G…	1.39935e-06	8.9767e-06
GRMZM5G831102	GRMZM5G831102_T01	2.05188	2.11892	7.81806	1.85901	not assigned.unknown	moderately similar to ( 223) AT1G47480 | Symbols: | hydrolase | chr1:17417623-17419296 FORWARDweakly similar to ( 125) GID1_ORYSA Gibberellin receptor GID1 (EC 3.-.-.-) (Gibberellin-insensitive dwarf protein 1) (Protein GIBBERELLIN INSENSITIVE DWARF1) - Oryza sativa (Rice)moderately similar to ( 464) loc_os09g28690 12009.m06020 protein gibberellin receptor GID1L2, putative, expressed seq=cds; coo…	1.39935e-06	8.9767e-06
GRMZM2G343317	GRMZM2G343317_T01	2.05132	58.214	214.818	19.7635	not assigned.unknown	weakly similar to ( 103) loc_os04g57760 12004.m10661 protein expressed protein seq=cds; coord=2:2060053..2060949:1; parent_gene=GRMZM2G343317	6.77699e-45	7.5183e-43
GRMZM2G174615	GRMZM2G174615_T01	2.04746	20.6888	76.0874	5.64438	not assigned.unknown	moderately similar to ( 247) loc_os03g15080 12003.m06945 protein expressed protein seq=cds; coord=1:35887738..35888916:-1; parent_gene=GRMZM2G174615	4.10702e-31	2.26384e-29
GRMZM2G073044	GRMZM2G073044_T01	2.04688	28.4288	104.528	31.8871	RNA.regulation of transcription.AS2,Lateral Organ Boundaries Gene Family	weakly similar to ( 176) AT3G02550 | Symbols: LBD41 | LBD41 (LOB DOMAIN-CONTAINING PROTEIN 41) | chr3:536747-537650 REVERSEmoderately similar to ( 237) loc_os01g32770 12001.m09596 protein seed specific protein Bn15D17A, putative, expressed seq=cds; coord=8:123469338..123470737:-1; parent_gene=GRMZM2G073044	1.50217e-40	1.35217e-38
GRMZM2G300945	GRMZM2G300945_T01	2.04677	1.38945	5.10311	2.14685	not assigned.unknown	moderately similar to ( 397) AT3G27640 | Symbols: | transducin family protein / WD-40 repeat family protein | chr3:10232307-10235467 FORWARDhighly similar to ( 759) loc_os03g49200 12003.m101455 protein cell division cycle protein cdt2, putative, expressed seq=cds; coord=5:12397184..12401076:1; parent_gene=GRMZM2G300945	7.85054e-08	6.2385e-07
GRMZM2G137694	GRMZM2G137694_T01	2.04673	6.17924	22.7166	17.5497	lipid metabolism.FA synthesis and FA elongation.beta ketoacyl CoA synthase	moderately similar to ( 498) AT5G43760 | Symbols: KCS20 | KCS20 (3-KETOACYL-COA SYNTHASE 20); fatty acid elongase | chr5:17585903-17588486 FORWARDhighly similar to ( 672) loc_os10g28060 12010.m05689 protein fatty acid elongase, putative, expressed seq=cds; coord=5:33783019..33787020:1; parent_gene=GRMZM2G137694	4.31986e-21	1.25306e-19
GRMZM2G090124	GRMZM2G090124_T01	2.04454	3.82236	14.0265	27.5697	not assigned.unknown	moderately similar to ( 433) AT5G11730 | Symbols: | unknown protein | chr5:3780963-3782473 FORWARDhighly similar to ( 533) loc_os03g52120 12003.m10189 protein expressed protein seq=cds; coord=1:272832650..272835441:1; parent_gene=GRMZM2G090124	6.90217e-14	1.11129e-12
GRMZM2G326707	GRMZM2G326707_T01	2.04338	124.595	457.646	182.562	transport.phosphate	highly similar to ( 740) AT2G38940 | Symbols: ATPT2, PHT1;4 | ATPT2 (ARABIDOPSIS THALIANA PHOSPHATE TRANSPORTER 2); carbohydrate transmembrane transporter/ inorganic phosphate transmembrane transporter/ phosphate transmembrane transporter/ sugar:hydrogen symporter | chr2:16258500-16260104 FORWARDhighly similar to ( 818) loc_os10g30790 12010.m21787 protein inorganic phosphate transporter 1-4, puta…	3.8714e-62	7.96124e-60
GRMZM2G389937	GRMZM2G389937_T02	2.03991	11.2174	41.0078		not assigned.unknown	very weakly similar to (94.7) loc_os11g32080 12011.m07110 protein conserved hypothetical protein seq=cds; coord=4:23166618..23167086:1; parent_gene=GRMZM2G389937	8.01448e-10	8.29113e-09
GRMZM2G400784	GRMZM2G400784_T01	2.03863	12.3664	45.1617	1.83354	protein.degradation.ubiquitin.E3.RING	very weakly similar to ( 100) AT3G05200 | Symbols: ATL6 | ATL6; protein binding / zinc ion binding | chr3:1477377-1478573 FORWARDvery weakly similar to (83.6) EL5_ORYSA E3 ubiquitin-protein ligase EL5 (EC 6.3.2.-) - Oryza sativa (Rice)moderately similar to ( 278) loc_os03g08920 12003.m06398 protein RING-H2 finger protein ATL3B precursor, putative, expressed seq=cds; coord=9:149732742..149735419:1…	1.73039e-36	1.2911e-34
GRMZM2G317614	GRMZM2G317614_T02	2.03857	7.50285	27.3632		not assigned.unknown	seq=cds; coord=5:7985583..7986261:-1; parent_gene=GRMZM2G317614	6.62312e-12	8.7162e-11
GRMZM2G096228	GRMZM2G096228_T01	2.03477	5.59214	20.3948	12.0297	signalling.calcium	weakly similar to ( 187) AT3G50360 | Symbols: ATCEN2, CEN1 | ATCEN2 (CENTRIN2); calcium ion binding | chr3:18674421-18675502 FORWARDweakly similar to ( 158) CATR_CHLRE Caltractin (Centrin) (20 kDa calcium-binding protein) - Chlamydomonas reinhardtiimoderately similar to ( 242) loc_os10g25010 12010.m05452 protein caltractin, putative, expressed seq=cds; coord=5:37374885..37376902:-1; parent_gene=G…	1.56511e-11	1.98835e-10
GRMZM2G018416	GRMZM2G018416_T01	2.03355	63.7905	232.365	137.28	lipid metabolism.lipid degradation.lysophospholipases.glycerophosphodiester phosphodiesterase	highly similar to ( 696) AT4G26690 | Symbols: SHV3, MRH5, GPDL2 | SHV3 (SHAVEN 3); glycerophosphodiester phosphodiesterase/ kinase | chr4:13456793-13459890 REVERSEnearly identical (1097) loc_os02g37590 12002.m08847 protein glycerophosphoryl diester phosphodiesterase family protein, putative, expressed seq=cds; coord=4:127851768..127857102:1; parent_gene=GRMZM2G018416	1.6551e-59	2.99029e-57
GRMZM2G165083	GRMZM2G165083_T01	2.0315	18.5443	67.3556		not assigned.unknown	seq=cds; coord=2:22894528..22895743:1; parent_gene=GRMZM2G165083	6.74436e-17	1.42994e-15
GRMZM5G826714	GRMZM5G826714_T01	2.02997	29.6971	107.835	62.0629	cell wall.cellulose synthesis.COBRA	highly similar to ( 680) AT5G60920 | Symbols: COB | COB (COBRA) | chr5:24511466-24513932 REVERSEhighly similar to ( 805) COBL3_ORYSA COBRA-like 3 protein precursor (BRITTLE CULM1-like 4 protein) - Oryza sativa (Rice)highly similar to ( 805) loc_os05g32110 12005.m083711 protein COBRA-like protein 4 precursor, putative, expressed seq=cds; coord=1:277379848..277383311:-1; parent_gene=GRMZM5G826714	2.73288e-46	3.29168e-44
GRMZM2G465999	GRMZM2G465999_T01	2.02152	1.20896	4.36368		signalling.receptor kinases.S-locus glycoprotein like	highly similar to ( 711) AT4G27290 | Symbols: | ATP binding / protein kinase/ protein serine/threonine kinase/ protein tyrosine kinase/ sugar binding | chr4:13666281-13669202 FORWARDmoderately similar to ( 351) SLSG3_BRAOL S-locus-specific glycoprotein S13 precursor (SLSG-13) (Fragment) - Brassica oleracea (Wild cabbage)nearly identical (1172) loc_os07g36544 12007.m07905 protein serine/threonine-…	1.19975e-07	9.22389e-07
GRMZM2G177928	GRMZM2G177928_T01	2.02007	6.97661	25.1817	9.44508	secondary metabolism.N misc.alkaloid-like	highly similar to ( 520) AT5G22020 | Symbols: | strictosidine synthase family protein | chr5:7287878-7289357 REVERSEweakly similar to ( 165) STSY_CATRO Strictosidine synthase precursor (EC 4.3.3.2) - Catharanthus roseus (Rosy periwinkle) (Madagascar periwinkle)highly similar to ( 684) loc_os03g53950 12003.m10360 protein strictosidine synthase precursor, putative, expressed seq=cds; coord=1:276686…	1.93423e-22	6.14628e-21
GRMZM2G123714	GRMZM2G123714_T01	2.0152	19.608	70.4614	37.4643	misc.beta 1,3 glucan hydrolases	weakly similar to ( 129) AT5G08000 | Symbols: E13L3, PDCB2 | E13L3 (GLUCAN ENDO-1,3-BETA-GLUCOSIDASE-LIKE PROTEIN 3); callose binding / polysaccharide binding | chr5:2563684-2565282 FORWARDvery weakly similar to (90.5) E13B_WHEAT Glucan endo-1,3-beta-glucosidase precursor (EC 3.2.1.39) ((1->3)-beta-glucan endohydrolase) ((1->3)-beta-glucanase) (Beta-1,3-endoglucanase) - Triticum aestivum (Wheat)w…	2.69807e-31	1.50319e-29
GRMZM2G310947	GRMZM2G310947_T02	2.01179	31.8257	114.26	1.76939	protein.degradation.AAA type	moderately similar to ( 443) AT5G40010 | Symbols: AATP1 | AATP1 (AAA-ATPase 1); ATP binding / ATPase/ nucleoside-triphosphatase/ nucleotide binding | chr5:16020218-16021762 REVERSEhighly similar to ( 530) loc_os12g44210 12012.m08192 protein cell Division Protein AAA ATPase family, putative, expressed seq=cds; coord=1:180624825..180627010:-1; parent_gene=GRMZM2G310947	7.22763e-47	8.87455e-45
AC204050.4	AC204050.4_FGT006	2.01153	21.9844	78.8404	2.90285	protein.postranslational modification	moderately similar to ( 240) AT4G26890 | Symbols: MAPKKK16 | MAPKKK16; ATP binding / kinase/ protein kinase/ protein serine/threonine kinase/ protein tyrosine kinase | chr4:13512072-13513406 FORWARDvery weakly similar to (96.3) M2K1_ORYSA Mitogen-activated protein kinase kinase 1 (EC 2.7.12.2) (MAP kinase kinase 1) (MAPKK1) (OsMEK1) - Oryza sativa (Rice)highly similar to ( 518) loc_os05g46750 120…	3.72953e-36	2.71076e-34
GRMZM5G841142	GRMZM5G841142_T02	2.00901	31.4834	113.259	14.0233	redox.thioredoxin	moderately similar to ( 493) AT2G17420 | Symbols: NTRA, ATNTRA, NTR2 | NTRA (NADPH-DEPENDENT THIOREDOXIN REDUCTASE A); thioredoxin-disulfide reductase | chr2:7564357-7566219 FORWARDhighly similar to ( 610) loc_os06g22140 12006.m06869 protein thioredoxin reductase 2, putative, expressed seq=cds; coord=6:121308710..121312198:-1; parent_gene=GRMZM5G841142	1.31686e-41	1.24286e-39
GRMZM2G031876	GRMZM2G031876_T01	2.0066	2.06851	7.37728		signalling.calcium	moderately similar to ( 455) AT2G26190 | Symbols: | calmodulin-binding family protein | chr2:11147901-11150082 REVERSEhighly similar to ( 655) loc_os05g10840 12005.m083645 protein calmodulin binding protein, putative, expressed seq=cds; coord=6:132456766..132460531:1; parent_gene=GRMZM2G031876	2.60087e-10	2.86277e-09
GRMZM2G446737	GRMZM2G446737_T01	2.00487	6.09188	21.744	1.43895	PS.lightreaction.photosystem II.PSII polypeptide subunits	weakly similar to ( 154) loc_os04g44190 12004.m78971 protein expressed protein seq=cds; coord=10:131049866..131053321:1; parent_gene=GRMZM2G446737	9.251e-11	1.0719e-09
GRMZM2G151589	GRMZM2G151589_T01	2.00311	4.77795	17.0158	12.4789	stress.biotic	moderately similar to ( 249) AT4G38660 | Symbols: | thaumatin, putative | chr4:18066448-18067792 REVERSEweakly similar to ( 187) TP1A_MALDO Thaumatin-like protein 1a precursor (Allergen Mal d 2) (Mdtl1) (Pathogenesis-related protein 5a) (PR-5a) - Malus domestica (Apple) (Malus sylvestris)moderately similar to ( 306) loc_os10g05600 12010.m03965 protein thaumatin-like protein 1 precursor, putative,…	1.14369e-15	2.18989e-14
GRMZM2G383699	GRMZM2G383699_T01	1.9988	11.4103	40.5312		not assigned.unknown	very weakly similar to (80.5) loc_os01g72910 12001.m13323 protein abscisic stress ripening protein 2, putative, expressed seq=cds; coord=3:65737318..65737903:1; parent_gene=GRMZM2G383699	1.20289e-13	1.88396e-12
AC233788.2	AC233788.2_FGT002	1.99553	20.1655	71.5092	114.962	not assigned.unknown	seq=cds; coord=8:169418845..169418994:1; parent_gene=AC233788.2_FG002	1.83064e-07	1.36551e-06
GRMZM2G439195	GRMZM2G439195_T01	1.99433	1.51772	5.38203	4.93271	metal handling.binding, chelation and storage	weakly similar to ( 159) AT5G04950 | Symbols: NAS1, ATNAS1 | NAS1 (NICOTIANAMINE SYNTHASE 1); nicotianamine synthase | chr5:1457876-1458838 REVERSEmoderately similar to ( 322) NAS3_ORYSA Nicotianamine synthase 3 (EC 2.5.1.43) (S-adenosyl-L-methionine:S-adenosyl-L-methionine:S-adenosyl-methionine 3-amino-3-carboxypropyltransferase 3) (OsNAS3) - Oryza sativa (Rice)moderately similar to ( 322) loc_o…	1.83064e-07	1.36551e-06
GRMZM2G170281	GRMZM2G170281_T01	1.99424	13.744	48.6895	3.02742	not assigned.unknown	highly similar to ( 849) AT5G10840 | Symbols: | endomembrane protein 70, putative | chr5:3424910-3427797 REVERSEhighly similar to ( 927) loc_os06g44140 12006.m08942 protein transmembrane 9 superfamily protein member 4, putative, expressed seq=cds; coord=6:95602483..95605694:1; parent_gene=GRMZM2G170281	3.30304e-36	2.4077e-34
GRMZM2G032107	GRMZM2G032107_T01	1.99192	7.39459	26.167	15.5584	not assigned.unknown	weakly similar to ( 108) loc_os01g04010 12001.m07037 protein expressed protein seq=cds; coord=3:22570388..22571485:-1; parent_gene=GRMZM2G032107	1.27031e-15	2.42134e-14
GRMZM2G376085	GRMZM2G376085_T01	1.98001	12.9082	45.264	44.1157	protein.degradation.ubiquitin.E3.RING	highly similar to ( 573) AT2G23140 | Symbols: | binding / ubiquitin-protein ligase | chr2:9845696-9849105 REVERSEmoderately similar to ( 204) SPL11_ORYSA Spotted leaf protein 11 (Spotted leaf11) (Cell death-related protein SPL11) - Oryza sativa (Rice)highly similar to ( 881) loc_os01g66130 12001.m12721 protein armadillo-repeat containing protein, putative, expressed seq=cds; coord=3:170771541..17…	9.33667e-37	7.0496e-35
GRMZM2G325139	GRMZM2G325139_T01	1.97931	8.45756	29.6292	1.25908	not assigned.unknown	seq=cds; coord=2:43760551..43761190:-1; parent_gene=GRMZM2G325139	1.68937e-11	2.13548e-10
GRMZM2G329181	GRMZM2G329181_T01	1.97769	3.39207	11.8807	2.59446	cell wall.cell wall proteins.AGPs.AGP	moderately similar to ( 322) AT2G35860 | Symbols: FLA16 | FLA16 (FASCICLIN-LIKE ARABINOGALACTAN PROTEIN 16 PRECURSOR) | chr2:15059859-15061810 FORWARDmoderately similar to ( 402) loc_os03g57460 12003.m10664 protein fasciclin domain, putative, expressed seq=cds; coord=1:285978669..285981839:-1; parent_gene=GRMZM2G329181	4.96174e-14	8.10215e-13
GRMZM2G067225	GRMZM2G067225_T01	1.97742	254.187	891.478	15.3713	hormone metabolism.jasmonate.synthesis-degradation.allene oxidase synthase	highly similar to ( 509) AT5G42650 | Symbols: AOS, CYP74A, DDE2 | AOS (ALLENE OXIDE SYNTHASE); allene oxide synthase/ hydro-lyase/ oxygen binding | chr5:17097803-17099359 REVERSEhighly similar to ( 675) C74A2_ORYSA Cytochrome P450 74A2 (EC 4.2.1.92) (Allene oxide synthase 2) (Hydroperoxide dehydrase 2) - Oryza sativa (Rice)highly similar to ( 675) loc_os03g12500 12003.m06700 protein cytochrome P4…	7.21561e-61	1.40393e-58
GRMZM2G152421	GRMZM2G152421_T01	1.97611	1.73045	6.05668	2.46839	protein.degradation.ubiquitin.proteasom	moderately similar to ( 333) AT1G29150 | Symbols: ATS9, RPN6 | ATS9 (ARABIDOPSIS NON-ATPASE SUBUNIT 9) | chr1:10181240-10182499 FORWARDmoderately similar to ( 410) loc_os04g36700 12004.m08710 protein 26S proteasome non-ATPase regulatory subunit 11, putative, expressed seq=cds; coord=3:121073395..121078930:-1; parent_gene=GRMZM2G152421	5.83589e-08	4.71909e-07
GRMZM2G018336	GRMZM2G018336_T01	1.97546	2.46915	8.62932		RNA.regulation of transcription.ABI3/VP1-related B3-domain-containing transcription factor family	weakly similar to ( 177) AT1G25560 | Symbols: TEM1 | TEM1 (TEMPRANILLO 1); transcription factor | chr1:8981891-8982976 REVERSEmoderately similar to ( 265) loc_os01g49830 12001.m11168 protein DNA-binding protein RAV1, putative, expressed seq=cds; coord=5:28639860..28641213:-1; parent_gene=GRMZM2G018336	8.52675e-08	6.73986e-07
GRMZM2G109448	GRMZM2G109448_T01	1.97466	20.4809	71.529	205.316	DNA.synthesis/chromatin structure.histone	weakly similar to ( 152) AT5G02560 | Symbols: HTA12 | HTA12; DNA binding | chr5:575437-576456 FORWARDweakly similar to ( 161) H2A6_ORYSA Probable histone H2A.6 - Oryza sativa (Rice)weakly similar to ( 161) loc_os05g02300 12005.m04766 protein histone H2A, putative, expressed seq=cds; coord=7:143296604..143298282:-1; parent_gene=GRMZM2G109448	2.52747e-35	1.77583e-33
GRMZM2G147942	GRMZM2G147942_T01	1.97369	3.7389	13.1042	33.1869	protein.degradation.subtilases	highly similar to ( 878) AT4G34980 | Symbols: SLP2 | SLP2; serine-type peptidase | chr4:16656929-16659223 REVERSEnearly identical (1177) loc_os03g13930 12003.m06837 protein subtilisin-like protease precursor, putative, expressed seq=cds; coord=1:32836004..32838941:-1; parent_gene=GRMZM2G147942	1.63127e-18	3.98661e-17
GRMZM5G812126	GRMZM5G812126_T01	1.97228	5.84087	20.3615		not assigned.unknown	weakly similar to ( 188) AT4G18425 | Symbols: | unknown protein | chr4:10181421-10182062 REVERSEmoderately similar to ( 314) loc_os06g24490 12006.m07100 protein expressed protein seq=cds; coord=9:62776698..62777760:1; parent_gene=GRMZM5G812126	1.17215e-12	1.66097e-11
GRMZM2G460566	GRMZM2G460566_T01	1.97005	17.0675	59.3609	12.0509	not assigned.unknown	weakly similar to ( 114) loc_os01g70470 12001.m13094 protein expressed protein seq=cds; coord=8:159951256..159952462:-1; parent_gene=GRMZM2G460566	3.51539e-26	1.42726e-24
GRMZM2G053503	GRMZM2G053503_T02	1.96968	15.6665	54.5726	21.448	RNA.regulation of transcription.AP2/EREBP, APETALA2/Ethylene-responsive element binding protein family	very weakly similar to (82.0) AT2G47520 | Symbols: | AP2 domain-containing transcription factor, putative | chr2:19502891-19503490 REVERSEweakly similar to ( 169) loc_os01g21120 12001.m08596 protein ethylene-responsive factor-like protein 1, putative, expressed seq=cds; coord=8:35561739..35562916:1; parent_gene=GRMZM2G053503	3.07965e-24	1.09713e-22
GRMZM2G354338	GRMZM2G354338_T01	1.96858	4.29628	14.9329	5.55731	not assigned.unknown	seq=cds; coord=6:142866545..142867211:-1; parent_gene=GRMZM2G354338	4.12031e-07	2.90709e-06
GRMZM2G479245	GRMZM2G479245_T01	1.96835	5.40975	18.8288	10.9528	cell.organisation	very weakly similar to (89.4) loc_os03g11060 12003.m06558 protein MFP1 attachment factor 1, putative, expressed seq=cds; coord=9:147478592..147479415:-1; parent_gene=GRMZM2G479245	8.5205e-10	8.78946e-09
AC233851.1	AC233851.1_FGT008	1.96529	11.7444	40.8205	3.08233	not assigned.unknown	weakly similar to ( 108) loc_os01g58150 12001.m11960 protein expressed protein seq=cds; coord=3:189455463..189455828:1; parent_gene=AC233851.1_FG008	2.76786e-09	2.68754e-08
AC210976.4	AC210976.4_FGT008	1.96497	2.54722	8.85352	5.73021	minor CHO metabolism.callose	weakly similar to ( 176) AT4G04970 | Symbols: ATGSL1, ATGSL01, GSL01, GSL1 | GSL1 (GLUCAN SYNTHASE-LIKE 1); 1,3-beta-glucan synthase/ transferase, transferring glycosyl groups | chr4:2537039-2542434 FORWARDmoderately similar to ( 217) loc_os01g55040 12001.m11664 protein ATGSL05, putative, expressed seq=cds; coord=2:231454321..231455842:-1; parent_gene=AC210976.4_FG008	6.3045e-07	4.31689e-06
GRMZM2G314520	GRMZM2G314520_T01	1.96287	2.88448	10.0109	1.57231	not assigned.unknown	weakly similar to ( 113) AT1G28280 | Symbols: | VQ motif-containing protein | chr1:9886297-9887395 REVERSEmoderately similar to ( 210) loc_os01g54400 12001.m11604 protein DNA-binding WRKY, putative, expressed seq=cds; coord=3:197382762..197384196:-1; parent_gene=GRMZM2G314520	3.9342e-09	3.74104e-08
GRMZM2G090842	GRMZM2G090842_T01	1.9599	4.44153	15.3635	5.12852	amino acid metabolism.misc	moderately similar to ( 306) AT1G12420 | Symbols: ACR8 | ACR8; amino acid binding | chr1:4226673-4228917 REVERSEmoderately similar to ( 495) loc_os03g14370 12003.m06877 protein ACR8, putative, expressed seq=cds; coord=9:142642524..142645730:-1; parent_gene=GRMZM2G090842	7.39412e-18	1.70489e-16
GRMZM5G884600	GRMZM5G884600_T01	1.95643	20.0205	69.0202	1.559	redox.ascorbate and glutathione.glutathione	moderately similar to ( 294) AT4G11600 | Symbols: ATGPX6, PHGPX, LSC803 | ATGPX6 (GLUTATHIONE PEROXIDASE 6); glutathione peroxidase | chr4:7010021-7011330 REVERSEmoderately similar to ( 290) GPX4_CITSI Probable phospholipid hydroperoxide glutathione peroxidase (EC 1.11.1.12) (PHGPx) (Salt-associated protein) - Citrus sinensis (Sweet orange)moderately similar to ( 316) loc_os04g46960 12004.m101614…	7.5469e-24	2.61137e-22
GRMZM2G103085	GRMZM2G103085_T01	1.95615	68.6392	237.073	9.3791	RNA.regulation of transcription.AP2/EREBP, APETALA2/Ethylene-responsive element binding protein family	weakly similar to ( 122) loc_os02g52670 12002.m10297 protein ethylene-responsive element binding protein 2, putative, expressed seq=cds; coord=5:209896463..209897682:-1; parent_gene=GRMZM2G103085	1.29113e-46	1.57009e-44
GRMZM2G005486	GRMZM2G005486_T01	1.95511	2.92475	10.0812	36.0094	protein.degradation.ubiquitin.E3.SCF.FBOX	moderately similar to ( 409) AT1G10780 | Symbols: | F-box family protein | chr1:3592875-3594310 REVERSEhighly similar to ( 661) loc_os09g28120 12009.m05963 protein F-box domain containing protein, expressed seq=cds; coord=2:185110714..185112905:-1; parent_gene=GRMZM2G005486	9.82082e-12	1.26933e-10
GRMZM2G168115	GRMZM2G168115_T01	1.95451	49.9818	172.466	3.82943	protein.degradation.aspartate protease	moderately similar to ( 344) AT4G35880 | Symbols: | aspartyl protease family protein | chr4:16993339-16995721 FORWARDvery weakly similar to (80.5) ASP1_ORYSA Aspartic proteinase Asp1 precursor (EC 3.4.23.-) (OsAsp1) (OSAP1) (Nucellin-like protein) - Oryza sativa (Rice)moderately similar to ( 468) loc_os06g50390 12006.m09563 protein aspartic-type endopeptidase/ pepsin A, putative, expressed seq=cd…	2.44951e-48	3.14508e-46
GRMZM2G021831	GRMZM2G021831_T01	1.95443	2.97758	10.2697	7.53563	RNA.regulation of transcription.Trihelix, Triple-Helix transcription factor family	weakly similar to ( 152) AT3G11100 | Symbols: | transcription factor | chr3:3476490-3477320 REVERSEmoderately similar to ( 359) loc_os04g36790 12004.m08719 protein 6b-interacting protein 1, putative, expressed seq=cds; coord=2:45778701..45780304:1; parent_gene=GRMZM2G021831	4.35399e-10	4.65468e-09
GRMZM2G057823	GRMZM2G057823_T01	1.95413	431.916	1488.66	515.206	glycolysis.cytosolic branch.aldolase	highly similar to ( 576) AT2G36460 | Symbols: | fructose-bisphosphate aldolase, putative | chr2:15296929-15297732 REVERSEhighly similar to ( 708) ALF_MAIZE Fructose-bisphosphate aldolase, cytoplasmic isozyme (EC 4.1.2.13) - Zea mays (Maize)highly similar to ( 669) loc_os05g33380 12005.m07570 protein fructose-bisphosphate aldolase cytoplasmic isozyme, putative, expressed seq=cds; coord=3:165722970…	6.40725e-60	1.18296e-57
GRMZM2G367228	GRMZM2G367228_T01	1.95135	32.5146	111.854		not assigned.unknown	seq=cds; coord=3:29358142..29358882:1; parent_gene=GRMZM2G367228	1.245e-27	5.64356e-26
GRMZM2G158313	GRMZM2G158313_T01	1.95116	2.80237	9.63332	2.5667	RNA.regulation of transcription.bZIP transcription factor family	weakly similar to ( 160) AT3G58120 | Symbols: ATBZIP61, BZIP61 | BZIP61; DNA binding / transcription activator/ transcription factor | chr3:21521289-21523078 REVERSEvery weakly similar to (85.9) RF2A_ORYSA Transcription factor RF2a - Oryza sativa (Rice)moderately similar to ( 225) loc_os02g14910 12002.m06735 protein bZIP transcription factor family protein, expressed seq=cds; coord=5:143972500..1…	1.2843e-07	9.83201e-07
GRMZM2G173965	GRMZM2G173965_T01	1.95004	34.8547	119.384	6.25152	protein.postranslational modification	weakly similar to ( 190) AT4G26890 | Symbols: MAPKKK16 | MAPKKK16; ATP binding / kinase/ protein kinase/ protein serine/threonine kinase/ protein tyrosine kinase | chr4:13512072-13513406 FORWARDmoderately similar to ( 444) loc_os01g50410 12001.m11223 protein mitogen-activated protein kinase kinase kinase 1, putative, expressed seq=cds; coord=8:153015039..153016559:-1; parent_gene=GRMZM2G173965	1.00066e-40	9.10454e-39
GRMZM2G046459	GRMZM2G046459_T01	1.94926	119.624	410.196	218.997	misc.beta 1,3 glucan hydrolases	moderately similar to ( 492) AT2G05790 | Symbols: | glycosyl hydrolase family 17 protein | chr2:2199450-2201293 FORWARDmoderately similar to ( 277) E13B_WHEAT Glucan endo-1,3-beta-glucosidase precursor (EC 3.2.1.39) ((1->3)-beta-glucan endohydrolase) ((1->3)-beta-glucanase) (Beta-1,3-endoglucanase) - Triticum aestivum (Wheat)highly similar to ( 701) loc_os02g53200 12002.m10349 protein glucan endo…	3.37664e-57	5.44005e-55
GRMZM2G010016	GRMZM2G010016_T01	1.94887	5.14145	17.6741	9.48012	not assigned.unknown	weakly similar to ( 119) loc_os01g19880 12001.m08524 protein expressed protein seq=cds; coord=8:36484403..36485269:1; parent_gene=GRMZM2G010016	2.87177e-09	2.77989e-08
GRMZM2G021621	GRMZM2G021621_T01	1.94693	16.25	55.7135	12.8633	cell wall.modification	weakly similar to ( 110) AT1G65680 | Symbols: ATEXPB2, EXPB2, ATHEXP BETA 1.4 | ATEXPB2 (ARABIDOPSIS THALIANA EXPANSIN B2) | chr1:24427266-24428399 FORWARDmoderately similar to ( 279) EXPB4_ORYSA Expansin-B4 precursor (OsEXPB4) (Beta-expansin-4) (OsaEXPb1.7) - Oryza sativa (Rice)moderately similar to ( 279) loc_os10g40730 12010.m06841 protein beta-expansin 1a precursor, putative, expressed seq=cd…	3.38672e-27	1.47189e-25
GRMZM2G077034	GRMZM2G077034_T01	1.94392	24.1645	82.5172	113.137	hormone metabolism.gibberelin.induced-regulated-responsive-activated	weakly similar to ( 103) AT2G39540 | Symbols: | gibberellin-regulated family protein | chr2:16500866-16501241 FORWARDweakly similar to ( 157) loc_os03g55290 12003.m10444 protein gibberellin-regulated protein 2 precursor, putative, expressed seq=cds; coord=5:6444041..6445037:1; parent_gene=GRMZM2G077034	1.79272e-27	8.02568e-26
GRMZM2G021794	GRMZM2G021794_T01	1.94013	9.59356	32.7556	5.6433	cell wall.cell wall proteins.AGPs.AGP	weakly similar to ( 102) AT2G20520 | Symbols: FLA6 | FLA6 (FASCICLIN-LIKE ARABINOGALACTAN 6) | chr2:8840663-8841406 FORWARDweakly similar to ( 184) loc_os05g48900 12005.m08961 protein fasciclin-like arabinogalactan protein 7 precursor, putative, expressed seq=cds; coord=6:164551086..164552313:1; parent_gene=GRMZM2G021794	6.75595e-19	1.69193e-17
GRMZM5G887068	GRMZM5G887068_T01	1.93866	2.72916	9.3035	24.6348	stress.abiotic.unspecified	weakly similar to ( 180) AT1G44760 | Symbols: | universal stress protein (USP) family protein | chr1:16896894-16898427 REVERSEmoderately similar to ( 254) loc_os05g35380 12005.m07768 protein universal stress protein family protein, expressed seq=cds; coord=8:102135988..102138900:1; parent_gene=GRMZM5G887068	1.79328e-08	1.5717e-07
GRMZM2G057841	GRMZM2G057841_T01	1.93852	25.2017	85.7874		not assigned.unknown	seq=cds; coord=5:171119248..171119873:-1; parent_gene=GRMZM2G057841	2.20717e-20	6.18253e-19
GRMZM2G437435	GRMZM2G437435_T01	1.93791	2.01096	6.85521		protein.degradation.subtilases	highly similar to ( 507) AT5G67360 | Symbols: ARA12 | ARA12; serine-type endopeptidase | chr5:26872192-26874465 REVERSEhighly similar to ( 877) loc_os12g23980 12012.m06233 protein subtilisin-like protease precursor, putative, expressed seq=cds; coord=10:15030707..15033081:-1; parent_gene=GRMZM2G437435	6.39951e-10	6.68605e-09
GRMZM2G041549	GRMZM2G041549_T01	1.9354	10.8871	37.0416	7.31733	protein.degradation.ubiquitin.E3.RING	very weakly similar to (90.1) AT4G33565 | Symbols: | protein binding / zinc ion binding | chr4:16136821-16137924 FORWARDweakly similar to ( 179) loc_os11g39640 12011.m07811 protein zinc finger, C3HC4 type family protein, expressed seq=cds; coord=2:229130480..229132263:1; parent_gene=GRMZM2G041549	1.74576e-25	6.72103e-24
GRMZM2G136800	GRMZM2G136800_T02	1.93397	6.48573	22.0423	21.8628	not assigned.unknown	highly similar to ( 585) AT2G33570 | Symbols: | unknown protein | chr2:14217361-14219043 FORWARDhighly similar to ( 793) loc_os06g22330 12006.m06887 protein expressed protein seq=cds; coord=6:121370867..121376705:1; parent_gene=GRMZM2G136800	2.35227e-22	7.40028e-21
GRMZM2G063733	GRMZM2G063733_T01	1.93269	3.44426	11.6951		Biodegradation of Xenobiotics	highly similar to ( 563) AT1G75620 | Symbols: | glyoxal oxidase-related | chr1:28394951-28396594 REVERSEhighly similar to ( 845) loc_os03g15320 12003.m06969 protein glyoxal oxidase, putative, expressed seq=cds; coord=1:36345668..36347747:1; parent_gene=GRMZM2G063733	2.01951e-13	3.10903e-12
GRMZM2G035665	GRMZM2G035665_T01	1.93159	10.3157	35.0112	35.5367	not assigned.unknown	moderately similar to ( 289) AT2G31270 | Symbols: ATCDT1A, CDT1A, CDT1 | CDT1A (ARABIDOPSIS HOMOLOG OF YEAST CDT1 A); cyclin-dependent protein kinase/ protein binding | chr2:13329037-13331544 FORWARDhighly similar to ( 601) loc_os04g10650 12004.m06315 protein CDT1a protein, putative, expressed seq=cds; coord=9:19532252..19535196:1; parent_gene=GRMZM2G035665	9.62205e-27	4.04286e-25
GRMZM2G125266	GRMZM2G125266_T01	1.93063	4.02741	13.6816	19.186	secondary metabolism.unspecified	moderately similar to ( 217) AT5G52810 | Symbols: | ornithine cyclodeaminase/mu-crystallin family protein | chr5:21399524-21400501 FORWARDmoderately similar to ( 414) loc_os10g38930 12010.m06660 protein mu-crystallin, putative, expressed seq=cds; coord=1:82508572..82509915:1; parent_gene=GRMZM2G125266	7.62442e-11	8.92834e-10
GRMZM2G044771	GRMZM2G044771_T01	1.92852	10.7846	36.4549	11.6972	not assigned.unknown	seq=cds; coord=8:125305205..125305824:-1; parent_gene=GRMZM2G044771	6.64234e-13	9.67807e-12
GRMZM2G453301	GRMZM2G453301_T01	1.92749	8.04809	27.2335	7.38341	not assigned.unknown	seq=cds; coord=5:171917471..171918103:1; parent_gene=GRMZM2G453301	3.26802e-10	3.54314e-09
GRMZM2G410991	GRMZM2G410991_T01	1.92723	18.6681	63.0689	1.51184	not assigned.unknown	weakly similar to ( 196) AT2G17120 | Symbols: LYM2 | LYM2 (LYSM DOMAIN GPI-ANCHORED PROTEIN 2 PRECURSOR) | chr2:7459156-7460648 FORWARDmoderately similar to ( 374) loc_os03g04110 12003.m101179 protein receptor-like GPI-anchored protein 2, putative, expressed seq=cds; coord=1:7566145..7569296:1; parent_gene=GRMZM2G410991	9.31941e-36	6.6589e-34
GRMZM2G322001	GRMZM2G322001_T01	1.92675	55.7726	188.613	33.6879	signalling.G-proteins	weakly similar to ( 132) AT5G07110 | Symbols: PRA1.B6 | PRA1.B6 (PRENYLATED RAB ACCEPTOR 1.B6) | chr5:2206121-2206771 FORWARDmoderately similar to ( 333) loc_os03g53070 12003.m10281 protein prenylated Rab receptor 2, putative, expressed seq=cds; coord=1:274941226..274942598:1; parent_gene=GRMZM2G322001	3.54083e-44	3.84385e-42
GRMZM2G354373	GRMZM2G354373_T01	1.92116	28.0211	94.1767	64.5634	protein.degradation.subtilases	highly similar to ( 888) AT3G14240 | Symbols: | subtilase family protein | chr3:4741637-4743964 REVERSEnearly identical (1187) loc_os08g35090 12008.m07498 protein subtilisin-like protease precursor, putative, expressed seq=cds; coord=4:62793116..62796058:1; parent_gene=GRMZM2G354373	8.3701e-45	9.24513e-43
GRMZM2G466044	GRMZM2G466044_T01	1.92019	16.3363	54.8338	13.2722	RNA.regulation of transcription.AP2/EREBP, APETALA2/Ethylene-responsive element binding protein family	weakly similar to ( 129) AT4G17500 | Symbols: ATERF-1 | ATERF-1 (ETHYLENE RESPONSIVE ELEMENT BINDING FACTOR 1); DNA binding / transcription activator/ transcription factor | chr4:9759405-9760211 FORWARDweakly similar to ( 131) ERF2_NICSY Ethylene-responsive transcription factor 2 (Ethylene-responsive element-binding factor 2) (EREBP-2) (NsERF2) - Nicotiana sylvestris (Wood tobacco)moderately simi…	8.75043e-29	4.3061e-27
GRMZM2G157929	GRMZM2G157929_T01	1.91982	1.35664	4.57025		misc.oxidases - copper, flavone etc.	highly similar to ( 726) AT3G13390 | Symbols: sks11 | sks11 (SKU5 Similar 11); copper ion binding / oxidoreductase | chr3:4351401-4353289 REVERSEhighly similar to ( 732) ASO_BRANA L-ascorbate oxidase homolog precursor (EC 1.10.3.3) (Ascorbase) - Brassica napus (Rape)highly similar to ( 923) loc_os01g60080 12001.m12139 protein L-ascorbate oxidase homolog precursor, putative, expressed seq=cds; coo…	4.31476e-07	3.03329e-06
GRMZM2G399433	GRMZM2G399433_T01	1.91817	2.79554	9.39446	3.61065	transport.misc	moderately similar to ( 493) AT3G11460 | Symbols: | pentatricopeptide (PPR) repeat-containing protein | chr3:3608250-3610121 FORWARDhighly similar to ( 842) loc_os01g60430 12001.m12171 protein pentatricopeptide repeat-containing protein, putative, expressed seq=cds; coord=3:185268618..185273288:-1; parent_gene=GRMZM2G399433	1.14196e-15	2.18824e-14
AC225718.2	AC225718.2_FGT009	1.91504	375.552	1256.69	16.0129	not assigned.unknown	seq=cds; coord=5:48629736..48630047:-1; parent_gene=AC225718.2_FG009	4.29066e-48	5.45367e-46
GRMZM2G071846	GRMZM2G071846_T01	1.91247	28.5118	95.5504	213.314	nucleotide metabolism.salvage.phosphoribosyltransferases.aprt	moderately similar to ( 253) AT1G80050 | Symbols: APT2, ATAPT2 | APT2 (ADENINE PHOSPHORIBOSYL TRANSFERASE 2); adenine phosphoribosyltransferase/ phosphate transmembrane transporter | chr1:30111708-30113261 REVERSEmoderately similar to ( 237) APT1_WHEAT Adenine phosphoribosyltransferase 1 (EC 2.4.2.7) (APRT 1) - Triticum aestivum (Wheat)moderately similar to ( 326) loc_os02g40010 12002.m09087 prot…	3.42931e-34	2.23559e-32
GRMZM2G133053	GRMZM2G133053_T01	1.91192	21.2346	71.1403	29.8096	cell wall.cell wall proteins.AGPs.AGP	weakly similar to ( 154) AT5G55730 | Symbols: FLA1 | FLA1 (FASCICLIN-LIKE ARAB INOGALACTAN 1) | chr5:22558375-22560392 REVERSEmoderately similar to ( 230) loc_os09g30010 12009.m06152 protein fasciclin-like arabinogalactan protein 8 precursor, putative, expressed seq=cds; coord=7:130426898..130428254:1; parent_gene=GRMZM2G133053	1.61151e-30	8.65424e-29
GRMZM2G070849	GRMZM2G070849_T01	1.91079	13.7433	45.9436		RNA.regulation of transcription.MYB domain transcription factor family	moderately similar to ( 263) AT5G49620 | Symbols: AtMYB78 | AtMYB78 (myb domain protein 78); DNA binding / transcription factor | chr5:20137491-20139384 REVERSEweakly similar to ( 164) MYBA2_ORYSA Myb-related protein MYBAS2 - Oryza sativa (Rice)moderately similar to ( 343) loc_os03g20090 12003.m101325 protein MYB transcription factor, putative, expressed seq=cds; coord=1:51397954..51400225:-1; pa…	8.47405e-28	3.90424e-26
GRMZM2G103972	GRMZM2G103972_T01	1.90935	42.6957	142.808	1.98317	cell wall.cellulose synthesis.cellulose synthase	highly similar to ( 755) AT1G02730 | Symbols: ATCSLD5, CSLD5 | ATCSLD5; 1,4-beta-D-xylan synthase/ cellulose synthase | chr1:594697-598473 REVERSEnearly identical (1262) loc_os07g36690 12007.m07919 protein CSLF2 - cellulose synthase-like family F; beta1,3;1,4 glucan synthase, expressed seq=cds; coord=7:156222296..156226604:-1; parent_gene=GRMZM2G103972	7.21634e-48	9.12651e-46
GRMZM2G083222	GRMZM2G083222_T01	1.90648	1.85904	6.20175	8.63979	misc.beta 1,3 glucan hydrolases	moderately similar to ( 440) AT5G58480 | Symbols: | glycosyl hydrolase family 17 protein | chr5:23641227-23642826 REVERSEweakly similar to ( 171) E13B_WHEAT Glucan endo-1,3-beta-glucosidase precursor (EC 3.2.1.39) ((1->3)-beta-glucan endohydrolase) ((1->3)-beta-glucanase) (Beta-1,3-endoglucanase) - Triticum aestivum (Wheat)highly similar to ( 680) loc_os03g18520 12003.m07274 protein glucan endo-1…	1.95443e-07	1.45099e-06
GRMZM2G050072	GRMZM2G050072_T01	1.90286	28.2323	93.9807	29.3105	not assigned.unknown	moderately similar to ( 224) AT3G62160 | Symbols: | transferase family protein | chr3:23014333-23015808 REVERSEvery weakly similar to (92.0) HCBT2_DIACA Anthranilate N-benzoyltransferase protein 2 (EC 2.3.1.144) (Anthranilate N-hydroxycinnamoyl/benzoyltransferase 2) - Dianthus caryophyllus (Carnation) (Clove pink)highly similar to ( 575) loc_os01g42870 12001.m10551 protein 10-deacetylbaccatin III…	9.52401e-38	7.59938e-36
GRMZM2G095333	GRMZM2G095333_T01	1.90082	6.8749	22.8683	3.54802	protein.assembly and cofactor ligation	moderately similar to ( 202) AT5G45680 | Symbols: ATFKBP13, FKBP13 | FK506-binding protein 1 (FKBP13) | chr5:18530894-18532128 FORWARDvery weakly similar to (98.6) FKB15_VICFA FK506-binding protein 2 precursor (EC 5.2.1.8) (Peptidyl-prolyl cis-trans isomerase) (PPIase) (Rotamase) (15 kDa FKBP) (FKBP-15) - Vicia faba (Broad bean)moderately similar to ( 269) loc_os06g45340 12006.m091754 protein FKB…	5.21581e-14	8.50057e-13
GRMZM2G128333	GRMZM2G128333_T01	1.89895	129.431	428.448	24.9354	protein.degradation.aspartate protease	moderately similar to ( 278) AT3G12700 | Symbols: | aspartyl protease family protein | chr3:4037136-4038387 FORWARDmoderately similar to ( 500) loc_os05g48330 12005.m08904 protein pepsin A, putative, expressed seq=cds; coord=8:67202733..67205896:1; parent_gene=GRMZM2G128333	4.50872e-54	6.63044e-52
GRMZM2G055982	GRMZM2G055982_T01	1.89812	29.723	98.3676	6.34756	protein.postranslational modification.kinase.receptor like cytoplasmatic kinase VII	moderately similar to ( 429) AT2G05940 | Symbols: | protein kinase, putative | chr2:2287514-2289270 REVERSEmoderately similar to ( 218) NORK_MEDTR Nodulation receptor kinase precursor (EC 2.7.11.1) (Does not make infections protein 2) (Symbiosis receptor-like kinase) (MtSYMRK) - Medicago truncatula (Barrel medic)highly similar to ( 616) loc_os06g10160 12006.m05734 protein protein kinase APK1A, ch…	1.0499e-39	9.15727e-38
GRMZM2G124530	GRMZM2G124530_T01	1.89651	3.34532	11.0685	24.4918	not assigned.unknown	moderately similar to ( 237) AT4G30130 | Symbols: | unknown protein | chr4:14735401-14737793 FORWARDhighly similar to ( 836) loc_os08g40830 12008.m61965 protein pumilio domain-containing protein PPD1, putative, expressed seq=cds; coord=4:41836957..41839994:-1; parent_gene=GRMZM2G124530	4.93587e-15	8.7983e-14
GRMZM2G024668	GRMZM2G024668_T01	1.89356	7.86641	25.9897	5.75127	stress.abiotic.heat	highly similar to ( 561) AT5G56030 | Symbols: HSP81-2, ERD8, HSP90.2 | HSP81-2 (HEAT SHOCK PROTEIN 81-2); ATP binding | chr5:22686923-22689433 FORWARDhighly similar to ( 585) HSP81_ORYSA Heat shock protein 81-1 (HSP81-1) (Heat shock protein 82) - Oryza sativa (Rice)highly similar to ( 585) loc_os08g39140 12008.m080203 protein heat shock protein 81-1, putative, expressed seq=cds; coord=1:184242132…	6.51247e-25	2.43318e-23
GRMZM2G146866	GRMZM2G146866_T01	1.89216	1.78803	5.89607		signalling.receptor kinases.legume-lectin	moderately similar to ( 493) AT5G06740 | Symbols: | lectin protein kinase family protein | chr5:2084094-2086052 FORWARDweakly similar to ( 163) CRI4_MAIZE Putative receptor protein kinase CRINKLY4 precursor (EC 2.7.11.1) - Zea mays (Maize)moderately similar to ( 438) loc_os04g49460 12004.m09880 protein ATP binding protein, putative, expressed seq=cds; coord=2:14466612..14469015:-1; parent_gene=GR…	1.31199e-08	1.1718e-07
GRMZM2G042660	GRMZM2G042660_T01	1.89042	21.5947	71.224	15.6542	misc.oxidases - copper, flavone etc.	highly similar to ( 648) AT1G31690 | Symbols: | amine oxidase/ copper ion binding / quinone binding | chr1:11343980-11347767 FORWARDhighly similar to ( 628) AMO_PEA Amine oxidase [copper-containing] precursor (EC 1.4.3.6) - Pisum sativum (Garden pea)highly similar to ( 917) loc_os06g23114 12006.m06963 protein amine oxidase precursor, putative, expressed seq=cds; coord=2:206256271..206260005:1; pa…	2.03472e-37	1.58846e-35
GRMZM5G895534	GRMZM5G895534_T01	1.88447	8.29959	27.2335	28.2606	not assigned.unknown	seq=cds; coord=2:203517456..203518643:1; parent_gene=GRMZM5G895534	2.91486e-07	2.11015e-06
GRMZM2G067992	GRMZM2G067992_T01	1.8816	37.0783	121.44	73.5804	mitochondrial electron transport / ATP synthesis.NADH-DH.localisation not clear	weakly similar to ( 125) AT4G02580 | Symbols: | NADH-ubiquinone oxidoreductase 24 kDa subunit, putative | chr4:1134586-1136906 FORWARDweakly similar to ( 139) loc_os05g43360 12005.m08464 protein NADH-ubiquinone oxidoreductase 24 kDa subunit, mitochondrial precursor, putative, expressed seq=cds; coord=6:157734092..157735384:-1; parent_gene=GRMZM2G067992	1.66765e-24	6.00876e-23
GRMZM2G037368	GRMZM2G037368_T01	1.88151	6.59048	21.5578	20.4319	RNA.regulation of transcription.Aux/IAA family	weakly similar to ( 176) AT2G22670 | Symbols: IAA8 | IAA8; transcription factor | chr2:9637136-9638459 FORWARDmoderately similar to ( 292) IAA5_ORYSA Auxin-responsive protein IAA5 (Indoleacetic acid-induced protein 5) - Oryza sativa (Rice)moderately similar to ( 292) loc_os01g48444 12001.m11036 protein OsIAA5 - Auxin-responsive Aux/IAA gene family member, expressed seq=cds; coord=3:209094740..209…	4.79754e-16	9.54751e-15
GRMZM2G357040	GRMZM2G357040_T01	1.88026	4.27745	13.9918	6.63051	not assigned.unknown	very weakly similar to (98.6) loc_os07g28720 12007.m07143 protein hypothetical protein seq=cds; coord=7:144821756..144822946:1; parent_gene=GRMZM2G357040	6.68168e-10	6.97509e-09
GRMZM2G174574	GRMZM2G174574_T02	1.8765	3.43953	11.2324	4.14511	secondary metabolism.phenylpropanoids.lignin biosynthesis.4CL	highly similar to ( 557) AT4G05160 | Symbols: | 4-coumarate--CoA ligase, putative / 4-coumaroyl-CoA synthase, putative | chr4:2664451-2666547 FORWARDmoderately similar to ( 370) 4CL2_ORYSA 4-coumarate--CoA ligase 2 (EC 6.2.1.12) (4CL 2) (4-coumaroyl-CoA synthase 2) - Oryza sativa (Rice)highly similar to ( 771) loc_os03g05780 12003.m06100 protein 4-coumarate--CoA ligase 2, putative, expressed seq=…	8.50202e-12	1.10851e-10
GRMZM2G169360	GRMZM2G169360_T01	1.87459	406.319	1323.64	73.7657	not assigned.unknown	very weakly similar to (90.1) loc_os03g07870 12003.m06299 protein expressed protein seq=cds; coord=9:150839998..150840198:1; parent_gene=GRMZM2G169360	1.4905e-42	1.46127e-40
GRMZM2G391794	GRMZM2G391794_T01	1.8741	4.33449	14.1342	15.6651	signalling.receptor kinases.leucine rich repeat XI	highly similar to ( 773) AT1G09970 | Symbols: LRR XI-23 | LRR XI-23; ATP binding / kinase/ protein kinase/ protein serine/threonine kinase | chr1:3252408-3255428 FORWARDmoderately similar to ( 395) RPK1_IPONI Receptor-like protein kinase precursor (EC 2.7.11.1) - Ipomoea nil (Japanese morning glory) (Pharbitis nil)nearly identical (1201) loc_os12g43640 12012.m08138 protein receptor-like protein k…	3.44175e-22	1.06948e-20
GRMZM2G480364	GRMZM2G480364_T01	1.87375	6.43237	20.96		not assigned.unknown	very weakly similar to (93.2) loc_os02g50710 12002.m10105 protein expressed protein seq=cds; coord=5:205927429..205928022:-1; parent_gene=GRMZM2G480364	5.96902e-08	4.81596e-07
GRMZM2G305066	GRMZM2G305066_T01	1.87045	4.09059	13.3016	7.49851	protein.postranslational modification	weakly similar to ( 162) AT5G55090 | Symbols: MAPKKK15 | MAPKKK15; ATP binding / kinase/ protein kinase/ protein serine/threonine kinase | chr5:22356852-22358198 REVERSEmoderately similar to ( 345) loc_os01g50400 12001.m11222 protein mitogen-activated protein kinase kinase kinase 1, putative, expressed seq=cds; coord=8:152972019..152973458:1; parent_gene=GRMZM2G305066	1.25735e-10	1.43777e-09
GRMZM2G129291	GRMZM2G129291_T01	1.86573	9.58336	31.061	11.9453	not assigned.unknown	highly similar to ( 541) AT5G12010 | Symbols: | unknown protein | chr5:3877975-3879483 REVERSEhighly similar to ( 603) loc_os05g51520 12005.m27471 protein transposon protein, putative, CACTA, En/Spm sub-class, expressed seq=cds; coord=8:77752702..77755143:1; parent_gene=GRMZM2G129291	4.54802e-26	1.8289e-24
GRMZM2G148772	GRMZM2G148772_T01	1.86487	2.65676	8.60589		RNA.regulation of transcription.C2C2(Zn) CO-like, Constans-like zinc finger family	weakly similar to ( 122) AT5G57660 | Symbols: ATCOL5, COL5 | zinc finger (B-box type) family protein | chr5:23355573-23356729 FORWARDmoderately similar to ( 316) loc_os02g08150 12002.m06161 protein CONSTANS-like protein CO7, putative, expressed seq=cds; coord=5:89714407..89716192:1; parent_gene=GRMZM2G148772	4.13762e-08	3.42142e-07
GRMZM2G150594	GRMZM2G150594_T01	1.86252	2.21113	7.14084	1.64932	RNA.regulation of transcription.AS2,Lateral Organ Boundaries Gene Family	moderately similar to ( 202) AT2G45420 | Symbols: LBD18 | LBD18 (LOB DOMAIN-CONTAINING PROTEIN 18) | chr2:18718601-18720445 FORWARDmoderately similar to ( 234) loc_os03g14270 12003.m06869 protein ramosa 2, putative seq=cds; coord=9:142754894..142757043:1; parent_gene=GRMZM2G150594	1.47501e-06	9.42141e-06
GRMZM2G328500	GRMZM2G328500_T01	1.86085	2.37894	7.68279	1.2675	cell wall.precursor synthesis.UGD	highly similar to ( 885) AT3G29360 | Symbols: | UDP-glucose 6-dehydrogenase, putative | chr3:11267375-11268817 REVERSEhighly similar to ( 895) UGDH_SOYBN UDP-glucose 6-dehydrogenase (EC 1.1.1.22) (UDP-Glc dehydrogenase) (UDP-GlcDH) (UDPGDH) - Glycine max (Soybean)highly similar to ( 934) loc_os12g25690 12012.m06393 protein UDP-glucose 6-dehydrogenase, putative, expressed seq=cds; coord=1:27813029…	9.06917e-11	1.05179e-09
GRMZM2G169825	GRMZM2G169825_T01	1.85825	2.23394	7.19372	7.9151	signalling.light	moderately similar to ( 412) AT5G66560 | Symbols: | phototropic-responsive NPH3 family protein | chr5:26564368-26566662 FORWARDweakly similar to ( 147) NPH3_ORYSA Coleoptile phototropism protein 1 (Non-phototropic hypocotyl 3-like protein) (NPH3-like protein) - Oryza sativa (Rice)highly similar to ( 724) loc_os03g52880 12003.m10261 protein transposon protein, putative, Mutator sub-class, expresse…	4.93234e-10	5.22659e-09
AC233979.1	AC233979.1_FGT007	1.85737	64.5558	207.998	93.5958	development.unspecified	very weakly similar to (89.7) loc_os04g49680 12004.m09901 protein expressed protein seq=cds; coord=10:135130731..135131021:-1; parent_gene=AC233979.1_FG007	4.50331e-23	1.48898e-21
GRMZM2G156310	GRMZM2G156310_T01	1.85423	4.60771	14.8211	1.61828	not assigned.unknown	moderately similar to ( 230) AT3G48690 | Symbols: ATCXE12, CXE12 | CXE12; carboxylesterase | chr3:18037186-18038160 REVERSEweakly similar to ( 139) GID1_ORYSA Gibberellin receptor GID1 (EC 3.-.-.-) (Gibberellin-insensitive dwarf protein 1) (Protein GIBBERELLIN INSENSITIVE DWARF1) - Oryza sativa (Rice)moderately similar to ( 345) loc_os09g28720 12009.m06023 protein gibberellin receptor GID1L2, put…	4.89297e-13	7.23335e-12
GRMZM2G103512	GRMZM2G103512_T01	1.85335	33.8585	108.631	7.66158	stress.abiotic.unspecified	moderately similar to ( 274) AT1G09560 | Symbols: GLP5 | GLP5 (GERMIN-LIKE PROTEIN 5); manganese ion binding / nutrient reservoir | chr1:3093896-3094639 FORWARDmoderately similar to ( 264) RHRE_PEA Rhicadhesin receptor precursor (Germin-like protein) - Pisum sativum (Garden pea)moderately similar to ( 336) loc_os01g18170 12001.m08359 protein rhicadhesin receptor precursor, putative, expressed seq…	4.55556e-33	2.76991e-31
GRMZM2G168953	GRMZM2G168953_T01	1.8528	7.34775	23.5745		misc.myrosinases-lectin-jacalin	highly similar to ( 650) AT2G37710 | Symbols: RLK | RLK (receptor lectin kinase); kinase | chr2:15814934-15816961 REVERSEmoderately similar to ( 211) PSKR_DAUCA Phytosulfokine receptor precursor (EC 2.7.11.1) (Phytosulfokine LRR receptor kinase) - Daucus carota (Carrot)highly similar to ( 969) loc_os04g44910 12004.m35044 protein protein kinase, putative, expressed seq=cds; coord=10:132547528..132…	1.59418e-24	5.76045e-23
GRMZM2G355316	GRMZM2G355316_T01	1.85154	49.9376	160.3	61.6743	not assigned.unknown	seq=cds; coord=7:128896463..128897259:-1; parent_gene=GRMZM2G355316	7.71152e-33	4.64417e-31
GRMZM2G111998	GRMZM2G111998_T01	1.85144	1.52265	4.88525	10.276	cell wall.degradation.mannan-xylose-arabinose-fucose	highly similar to ( 656) AT5G09730 | Symbols: BXL3, ATBXL3, XYL3, ATBX3, BX3 | BXL3 (beta-xylosidase 3); hydrolase, hydrolyzing O-glycosyl compounds | chr5:3015319-3018226 REVERSEmoderately similar to ( 329) XYNB_PRUPE Putative beta-D-xylosidase (EC 3.2.1.-) (PpAz152) (Fragment) - Prunus persica (Peach)nearly identical (1299) loc_os01g19220 12001.m08459 protein beta-D-xylosidase, putative, expres…	4.16207e-08	3.43813e-07
GRMZM2G081652	GRMZM2G081652_T01	1.85087	53.1765	170.295	104.938	transport.misc	moderately similar to ( 402) AT4G09160 | Symbols: | SEC14 cytosolic factor family protein / phosphoglyceride transfer family protein | chr4:5839761-5842158 FORWARDhighly similar to ( 650) loc_os01g65380 12001.m12651 protein patellin-5, putative, expressed seq=cds; coord=3:173472565..173475730:-1; parent_gene=GRMZM2G081652	8.07258e-46	9.4971e-44
GRMZM2G176472	GRMZM2G176472_T01	1.84796	24.6173	78.8465	23.7567	signalling.calcium	moderately similar to ( 233) AT5G57580 | Symbols: | calmodulin-binding protein | chr5:23314994-23317683 REVERSEhighly similar to ( 692) loc_os12g36110 12012.m07401 protein calmodulin binding protein, putative, expressed seq=cds; coord=10:23804445..23808523:-1; parent_gene=GRMZM2G176472	1.85621e-37	1.45359e-35
GRMZM2G396540	GRMZM2G396540_T01	1.8459	23.2311	74.3152	63.6348	not assigned.unknown	weakly similar to ( 164) AT1G52910 | Symbols: | unknown protein | chr1:19708114-19709128 FORWARDmoderately similar to ( 230) loc_os07g27810 12007.m07055 protein fiber protein Fb34, putative, expressed seq=cds; coord=7:44176417..44179796:-1; parent_gene=GRMZM2G396540	1.69744e-27	7.62611e-26
GRMZM2G090493	GRMZM2G090493_T01	1.84394	4.7742	15.2439	9.666	protein.degradation.ubiquitin.E3.RING	moderately similar to ( 298) AT3G01400 | Symbols: | armadillo/beta-catenin repeat family protein | chr3:151920-152987 FORWARDweakly similar to ( 135) SPL11_ORYSA Spotted leaf protein 11 (Spotted leaf11) (Cell death-related protein SPL11) - Oryza sativa (Rice)moderately similar to ( 478) loc_os07g39880 12007.m08230 protein exodeoxyribonuclease V, putative, expressed seq=cds; coord=2:208538326..208…	2.93541e-13	4.4674e-12
GRMZM2G025240	GRMZM2G025240_T01	1.84261	15.2251	48.5825	22.4488	cell wall.cell wall proteins.AGPs.AGP	very weakly similar to (91.7) loc_os01g47780 12001.m10971 protein fasciclin-like arabinogalactan protein 7 precursor, putative, expressed seq=cds; coord=8:69589821..69590301:1; parent_gene=GRMZM2G025240	3.4309e-12	4.64071e-11
GRMZM2G180328	GRMZM2G180328_T01	1.84232	5.38145	17.1309		RNA.regulation of transcription.NAC domain transcription factor family	moderately similar to ( 328) AT1G01720 | Symbols: ATAF1, ANAC002 | ATAF1; transcription activator/ transcription factor | chr1:268471-269514 FORWARDmoderately similar to ( 411) NAC48_ORYSA NAC domain-containing protein 48 (ONAC048) - Oryza sativa (Rice)moderately similar to ( 472) loc_os05g34830 12005.m27596 protein NAC domain-containing protein 48, putative, expressed seq=cds; coord=6:147868257.…	1.89481e-12	2.62328e-11
GRMZM2G005552	GRMZM2G005552_T01	1.84128	12.989	41.4894	18.618	development.storage proteins	moderately similar to ( 447) AT2G28680 | Symbols: | cupin family protein | chr2:12303118-12304747 REVERSEvery weakly similar to (97.8) GLUA2_ORYSA Glutelin type-A 2 precursor (Glutelin type II) [Contains: Glutelin type-A 2 acidic chain; Glutelin type-A 2 basic chain] - Oryza sativa (Rice)highly similar to ( 549) loc_os05g02520 12005.m27675 protein legumin-like protein, putative, expressed seq=cds…	6.29073e-22	1.9287e-20
GRMZM2G479045	GRMZM2G479045_T01	1.84098	6.15366	19.5842	1.6076	not assigned.unknown	weakly similar to ( 126) loc_os07g33270 12007.m07588 protein expressed protein seq=cds; coord=2:203154460..203155261:-1; parent_gene=GRMZM2G479045	4.40914e-09	4.16759e-08
GRMZM2G043921	GRMZM2G043921_T01	1.83727	15.8072	50.2629	12.8995	not assigned.unknown	weakly similar to ( 120) loc_os02g55610 12002.m10586 protein serine-rich protein, putative, expressed seq=cds; coord=4:173553869..173554855:1; parent_gene=GRMZM2G043921	5.21049e-20	1.40806e-18
AC230013.2	AC230013.2_FGT002	1.83502	3.12996	9.92803	3.60058	misc.peroxidases	moderately similar to ( 342) AT2G34060 | Symbols: | peroxidase, putative | chr2:14384914-14386530 FORWARDmoderately similar to ( 211) PER2_ARAHY Cationic peroxidase 2 precursor (EC 1.11.1.7) (PNPC2) - Arachis hypogaea (Peanut)moderately similar to ( 259) loc_os06g13050 12006.m06020 protein peroxidase family protein, expressed seq=cds; coord=3:210670732..210673561:-1; parent_gene=AC230013.2_FG002	6.4504e-07	4.41321e-06
GRMZM2G046916	GRMZM2G046916_T01	1.83051	5.30223	16.7963	14.5399	RNA.processing.splicing	moderately similar to ( 362) AT1G03140 | Symbols: | splicing factor Prp18 family protein | chr1:754471-756223 REVERSEhighly similar to ( 517) loc_os07g38420 12007.m08088 protein prp18 domain containing protein, expressed seq=cds; coord=7:159464611..159467729:-1; parent_gene=GRMZM2G046916	3.45928e-17	7.47217e-16
GRMZM2G040803	GRMZM2G040803_T01	1.82886	4.95077	15.6504	7.66502	protein.degradation.ubiquitin.E3.RING	weakly similar to ( 117) AT4G03510 | Symbols: RMA1 | RMA1; protein binding / ubiquitin-protein ligase/ zinc ion binding | chr4:1557905-1558654 REVERSEmoderately similar to ( 344) loc_os04g44820 12004.m09439 protein ring domain containing protein, putative, expressed seq=cds; coord=10:132511510..132515292:-1; parent_gene=GRMZM2G040803	5.42791e-13	7.98218e-12
GRMZM2G444621	GRMZM2G444621_T01	1.82885	22.743	71.8546	1.23024	signalling.calcium	moderately similar to ( 211) AT3G22930 | Symbols: | calmodulin, putative | chr3:8124286-8125835 REVERSEmoderately similar to ( 209) CALM_CAPAN Calmodulin (CaM) - Capsicum annuum (Bell pepper)moderately similar to ( 219) loc_os12g41110 12012.m07893 protein calmodulin, putative, expressed seq=cds; coord=3:118962055..118962971:1; parent_gene=GRMZM2G444621	2.27905e-23	7.67593e-22
GRMZM2G304897	GRMZM2G304897_T01	1.82682	2.30309	7.27377	3.20575	signalling.receptor kinases.DUF 26	moderately similar to ( 342) AT1G34300 | Symbols: | lectin protein kinase family protein | chr1:12503450-12505939 FORWARDmoderately similar to ( 313) KPRO_MAIZE Putative receptor protein kinase ZmPK1 precursor (EC 2.7.11.1) - Zea mays (Maize)nearly identical (1141) loc_os10g01100 12010.m03538 protein receptor-like protein kinase, putative, expressed seq=cds; coord=1:107791759..107794523:1; parent…	6.55804e-11	7.73329e-10
GRMZM2G133282	GRMZM2G133282_T01	1.82309	10.2014	32.0561	5.22425	not assigned.unknown	highly similar to ( 774) AT4G34940 | Symbols: ARO1 | ARO1 (ARMADILLO REPEAT ONLY 1); binding | chr4:16639760-16641754 FORWARDnearly identical (1066) loc_os09g36550 12009.m06604 protein armadillo/beta-catenin-like repeat family protein, expressed seq=cds; coord=2:196141046..196143698:1; parent_gene=GRMZM2G133282	8.41812e-27	3.56067e-25
GRMZM2G018070	GRMZM2G018070_T01	1.82157	9.4561	29.7163	22.0026	protein.degradation.ubiquitin.E3.RING	weakly similar to ( 120) loc_os08g38460 12008.m07830 protein RING-H2 finger protein, putative, expressed seq=cds; coord=2:188899852..188900979:-1; parent_gene=GRMZM2G018070	2.72446e-15	5.01911e-14
GRMZM2G308503	GRMZM2G308503_T01	1.821	4.32816	13.5846		not assigned.unknown	weakly similar to ( 105) loc_os09g27330 12009.m05885 protein expressed protein seq=cds; coord=7:122921725..122922570:1; parent_gene=GRMZM2G308503	2.91486e-07	2.11015e-06
GRMZM2G097805	GRMZM2G097805_T01	1.81851	5.17491	16.23	31.1376	protein.postranslational modification	highly similar to ( 769) AT1G53050 | Symbols: | protein kinase family protein | chr1:19772574-19775531 FORWARDmoderately similar to ( 221) CDC2A_ANTMA Cell division control protein 2 homolog A (EC 2.7.11.22) (EC 2.7.11.23) - Antirrhinum majus (Garden snapdragon)nearly identical (1094) loc_os01g10430 12001.m42914 protein transposon protein, putative, unclassified, expressed seq=cds; coord=8:228152…	2.15849e-18	5.23459e-17
GRMZM2G417945	GRMZM2G417945_T01	1.8178	5.72453	17.9311	4.99572	misc.UDP glucosyl and glucoronyl transferases	moderately similar to ( 318) AT4G15490 | Symbols: UGT84A3 | UGT84A3; UDP-glycosyltransferase/ sinapate 1-glucosyltransferase/ transferase, transferring glycosyl groups | chr4:8852864-8854303 REVERSEmoderately similar to ( 236) IAAG_MAIZE Indole-3-acetate beta-glucosyltransferase (EC 2.4.1.121) (IAA-Glu synthetase) ((Uridine 5-diphosphate-glucose:indol-3-ylacetyl)-beta-D-glucosyl transferase) - Ze…	7.41993e-14	1.19086e-12
GRMZM2G170017	GRMZM2G170017_T01	1.81708	21.7804	68.1909		misc.short chain dehydrogenase/reductase (SDR)	moderately similar to ( 233) AT1G01800 | Symbols: | short-chain dehydrogenase/reductase (SDR) family protein | chr1:293595-294888 FORWARDmoderately similar to ( 334) loc_os02g42810 12002.m09316 protein carbonyl reductase 1, putative, expressed seq=cds; coord=5:188857165..188858944:1; parent_gene=GRMZM2G170017	2.25485e-27	1.0006e-25
GRMZM2G106945	GRMZM2G106945_T01	1.81701	23.3281	73.2747	44.8874	signalling.calcium	weakly similar to ( 147) AT1G24620 | Symbols: | polcalcin, putative / calcium-binding pollen allergen, putative | chr1:8723893-8724453 REVERSEweakly similar to ( 111) CALM_CHLRE Calmodulin (CaM) - Chlamydomonas reinhardtiimoderately similar to ( 254) loc_os01g72100 12001.m13246 protein polcalcin Jun o 2, putative, expressed seq=cds; coord=3:149552437..149553876:1; parent_gene=GRMZM2G106945	3.60623e-23	1.20021e-21
GRMZM2G309327	GRMZM2G309327_T01	1.81452	41.8869	130.546	2.19055	signalling.calcium	weakly similar to ( 121) AT5G44460 | Symbols: | calcium-binding protein, putative | chr5:17917286-17917831 FORWARDweakly similar to ( 108) ALLB3_BETVE Calcium-binding allergen Bet v 3 (Bet v III) - Betula verrucosa (White birch) (Betula pendula)moderately similar to ( 216) loc_os03g21380 12003.m35206 protein calcium-binding protein CAST, putative, expressed seq=cds; coord=9:131670769..131671798:1…	1.44348e-32	8.55066e-31
GRMZM2G325938	GRMZM2G325938_T01	1.81237	3.87274	12.0895	12.2911	amino acid metabolism.synthesis.aromatic aa.chorismate.3-deoxy-D-arabino-heptulosonate 7-phosphate synthase	weakly similar to ( 182) AT1G22410 | Symbols: | 2-dehydro-3-deoxyphosphoheptonate aldolase, putative / 3-deoxy-D-arabino-heptulosonate 7-phosphate synthase, putative / DAHP synthetase, putative | chr1:7912120-7914742 FORWARDweakly similar to ( 171) AROG_ORYSA Phospho-2-dehydro-3-deoxyheptonate aldolase 2, chloroplast precursor (EC 2.5.1.54) (Phospho-2-keto-3-deoxyheptonate aldolase 2) (DAHP synth…	5.31159e-10	5.60264e-09
GRMZM2G018589	GRMZM2G018589_T01	1.80666	4.83383	15.0453	270.093	RNA.regulation of transcription.MADS box transcription factor family	moderately similar to ( 255) AT4G18960 | Symbols: AG | AG (AGAMOUS); DNA binding / transcription factor | chr4:10383917-10388272 FORWARDmoderately similar to ( 310) MAD21_ORYSA MADS-box transcription factor 21 (OsMADS21) (RMADS207) - Oryza sativa (Rice)moderately similar to ( 310) loc_os01g66290 12001.m42780 protein MADS-box transcritpion factor 21, putative, expressed seq=cds; coord=3:170364983.…	9.57737e-12	1.24332e-10
GRMZM2G454719	GRMZM2G454719_T01	1.80666	6.94458	21.5978	18.0395	amino acid metabolism.synthesis.aromatic aa.chorismate.3-deoxy-D-arabino-heptulosonate 7-phosphate synthase	highly similar to ( 558) AT1G22410 | Symbols: | 2-dehydro-3-deoxyphosphoheptonate aldolase, putative / 3-deoxy-D-arabino-heptulosonate 7-phosphate synthase, putative / DAHP synthetase, putative | chr1:7912120-7914742 FORWARDhighly similar to ( 603) AROG_ORYSA Phospho-2-dehydro-3-deoxyheptonate aldolase 2, chloroplast precursor (EC 2.5.1.54) (Phospho-2-keto-3-deoxyheptonate aldolase 2) (DAHP synth…	5.9384e-13	8.6975e-12
GRMZM2G319281	GRMZM2G319281_T02	1.80474	4.99672	15.5305	19.9521	not assigned.unknown	weakly similar to ( 106) AT3G50690 | Symbols: | leucine-rich repeat family protein | chr3:18835271-18837097 REVERSEweakly similar to ( 117) AN32_ORYSA Acidic leucine-rich nuclear phosphoprotein 32-related protein (ANP32/acidic nuclear phosphoprotein-like protein) - Oryza sativa (Rice)weakly similar to ( 166) loc_os03g46600 12003.m09678 protein acidic leucine-rich nuclear phosphoprotein 32 family …	1.0737e-09	1.09289e-08
GRMZM2G003406	GRMZM2G003406_T01	1.80451	3.80056	11.8126	3.31301	RNA.regulation of transcription.MYB domain transcription factor family	moderately similar to ( 220) AT5G26660 | Symbols: ATMYB4, ATMYB86 | ATMYB86 (MYB DOMAIN PROTEIN 86); specific transcriptional repressor/ transcription repressor | chr5:9331775-9333044 REVERSEmoderately similar to ( 285) MYB3_HORVU Myb-related protein Hv33 - Hordeum vulgare (Barley)moderately similar to ( 405) loc_os01g50720 12001.m11253 protein myb-related protein Hv33, putative, expressed seq=cd…	1.0737e-09	1.09289e-08
GRMZM2G163427	GRMZM2G163427_T01	1.80168	1.6419	5.09058	6.26493	RNA.regulation of transcription.GRAS transcription factor family	moderately similar to ( 439) AT2G37650 | Symbols: | scarecrow-like transcription factor 9 (SCL9) | chr2:15792623-15794779 FORWARDweakly similar to ( 199) CIGR2_ORYSA Chitin-inducible gibberellin-responsive protein 2 - Oryza sativa (Rice)highly similar to ( 771) loc_os11g47870 12011.m08584 protein chitin-inducible gibberellin-responsive protein 2, putative, expressed seq=cds; coord=4:843149..84566…	1.31825e-07	1.00737e-06
GRMZM2G061487	GRMZM2G061487_T01	1.80144	59.2565	184.096	66.2521	RNA.regulation of transcription.AP2/EREBP, APETALA2/Ethylene-responsive element binding protein family	weakly similar to ( 110) AT4G39780 | Symbols: | AP2 domain-containing transcription factor, putative | chr4:18458216-18459034 REVERSEmoderately similar to ( 202) loc_os08g31580 12008.m07152 protein DRE binding factor 1, putative, expressed seq=cds; coord=1:217586061..217587629:1; parent_gene=GRMZM2G061487	1.45462e-40	1.31404e-38
GRMZM2G091088	GRMZM2G091088_T01	1.80102	6.29135	19.4642	11.3426	stress.biotic	moderately similar to ( 236) AT3G07040 | Symbols: RPM1, RPS3 | RPM1 (RESISTANCE TO P. SYRINGAE PV MACULICOLA 1); nucleotide binding / protein binding | chr3:2226244-2229024 REVERSEhighly similar to ( 842) loc_os01g23380 12001.m08812 protein stripe rust resistance protein Yr10, putative, expressed seq=cds; coord=3:61339824..61342588:-1; parent_gene=GRMZM2G091088	5.12098e-20	1.38683e-18
GRMZM2G030173	GRMZM2G030173_T01	1.80013	9.60446	29.7644	63.9345	cell wall.modification	very weakly similar to (95.9) AT2G06850 | Symbols: EXGT-A1, EXT | EXGT-A1 (ENDOXYLOGLUCAN TRANSFERASE); hydrolase, acting on glycosyl bonds / xyloglucan:xyloglucosyl transferase | chr2:2763619-2765490 FORWARDvery weakly similar to (85.9) XTH_TOBAC Probable xyloglucan endotransglucosylase/hydrolase protein precursor (EC 2.4.1.207) - Nicotiana tabacum (Common tobacco)moderately similar to ( 372) lo…	8.6989e-15	1.52481e-13
GRMZM2G177883	GRMZM2G177883_T01	1.79898	16.9323	52.2958	2.777	signalling.receptor kinases.leucine rich repeat XI	highly similar to ( 687) AT5G25930 | Symbols: | leucine-rich repeat family protein / protein kinase family protein | chr5:9050880-9053978 FORWARDmoderately similar to ( 410) RPK1_IPONI Receptor-like protein kinase precursor (EC 2.7.11.1) - Ipomoea nil (Japanese morning glory) (Pharbitis nil)nearly identical (1199) loc_os01g53920 12001.m42717 protein receptor-like protein kinase 5 precursor, putat…	2.69726e-35	1.87946e-33
GRMZM2G118951	GRMZM2G118951_T01	1.79799	84.4722	260.739	24.0355	not assigned.unknown	very weakly similar to (97.4) AT1G17620 | Symbols: | FUNCTIONS IN: molecular_function unknown; INVOLVED IN: biological_process unknown; LOCATED IN: plasma membrane; EXPRESSED IN: 23 plant structures; EXPRESSED DURING: 13 growth stages; CONTAINS InterPro DOMAIN/s: Harpin-induced 1 (InterPro:IPR010847); BEST Arabidopsis thaliana protein match is: unknown protein (TAIR:AT5G11890.1); Has 539 Blast hi…	4.52256e-44	4.82674e-42
GRMZM2G075459	GRMZM2G075459_T01	1.79738	30.0671	92.7567	13.2676	not assigned.unknown	seq=cds; coord=1:15414787..15415199:1; parent_gene=GRMZM2G075459	9.53486e-17	1.99483e-15
GRMZM2G060465	GRMZM2G060465_T01	1.79556	5.79616	17.899	1.95585	RNA.regulation of transcription.AP2/EREBP, APETALA2/Ethylene-responsive element binding protein family	seq=cds; coord=4:184862676..184863499:-1; parent_gene=GRMZM2G060465	1.95899e-08	1.70394e-07
GRMZM2G020943	GRMZM2G020943_T01	1.79451	2.20908	6.82182	4.54712	not assigned.unknown	moderately similar to ( 412) AT1G70280 | Symbols: | NHL repeat-containing protein | chr1:26466086-26468471 REVERSEhighly similar to ( 650) loc_os06g15820 12006.m06295 protein expressed protein seq=cds; coord=6:116330290..116334561:1; parent_gene=GRMZM2G020943	4.09429e-08	3.38877e-07
GRMZM2G357631	GRMZM2G357631_T01	1.79434	146.738	451.065	69.1415	not assigned.unknown	seq=cds; coord=7:154185556..154186513:-1; parent_gene=GRMZM2G357631	8.72438e-44	9.11878e-42
GRMZM2G009406	GRMZM2G009406_T01	1.79415	60.7764	187.044	9.15393	RNA.regulation of transcription.C2C2(Zn) DOF zinc finger family	weakly similar to ( 107) AT3G50410 | Symbols: OBP1 | OBP1 (OBF BINDING PROTEIN 1); DNA binding / protein binding / transcription factor | chr3:18709872-18710633 FORWARDweakly similar to ( 144) MNB1A_MAIZE Dof zinc finger protein MNB1A - Zea mays (Maize)moderately similar to ( 215) loc_os09g29960 12009.m06147 protein dof zinc finger protein MNB1A, putative, expressed seq=cds; coord=2:188526058..18…	6.21778e-42	5.97995e-40
GRMZM2G037910	GRMZM2G037910_T01	1.79348	2.469	7.60467		RNA.regulation of transcription.bZIP transcription factor family	weakly similar to ( 166) AT2G21230 | Symbols: | bZIP family transcription factor | chr2:9093920-9096059 REVERSEweakly similar to ( 131) RF2A_ORYSA Transcription factor RF2a - Oryza sativa (Rice)moderately similar to ( 248) loc_os08g43090 12008.m08285 protein DNA binding protein, putative, expressed seq=cds; coord=2:194113075..194115135:1; parent_gene=GRMZM2G037910	2.87854e-07	2.0878e-06
GRMZM2G143457	GRMZM2G143457_T01	1.79141	5.41989	16.6559	5.61886	not assigned.unknown	highly similar to ( 607) AT5G13210 | Symbols: | CONTAINS InterPro DOMAIN/s: Uncharacterized conserved protein UCP015417, vWA (InterPro:IPR011205), von Willebrand factor, type A (InterPro:IPR002035); BEST Arabidopsis thaliana protein match is: unknown protein (TAIR:AT3G24780.1); Has 250 Blast hits to 233 proteins in 28 species: Archae - 0; Bacteria - 8; Metazoa - 0; Fungi - 23; Plants - 45; Viruse…	2.98609e-17	6.50562e-16
GRMZM2G069542	GRMZM2G069542_T01	1.79038	66.9464	205.76	139.215	PS.carbon concentrating mechanism.C4	nearly identical (1584) AT3G14940 | Symbols: ATPPC3 | ATPPC3 (PHOSPHOENOLPYRUVATE CARBOXYLASE 3); phosphoenolpyruvate carboxylase | chr3:5025584-5029476 FORWARDnearly identical (1845) CAPP1_SORBI Phosphoenolpyruvate carboxylase 1 (EC 4.1.1.31) (PEPCase 1) (PEPC 1) (CP21) - Sorghum bicolor (Sorghum) (Sorghum vulgare)nearly identical (1788) loc_os02g14770 12002.m100156 protein phosphoenolpyruvate c…	1.33473e-47	1.67964e-45
GRMZM2G339117	GRMZM2G339117_T01	1.78646	10.3714	31.8198		not assigned.unknown	seq=cds; coord=2:6596683..6597383:1; parent_gene=GRMZM2G339117	2.70127e-10	2.96425e-09
GRMZM2G323422	GRMZM2G323422_T01	1.78566	9.89743	30.4036	1.27906	not assigned.unknown	seq=cds; coord=9:6066077..6066832:-1; parent_gene=GRMZM2G323422	2.7723e-11	3.40567e-10
GRMZM2G047971	GRMZM2G047971_T02	1.78333	3.84279	11.7567	4.66814	protein.synthesis.ribosomal protein.eukaryotic.60S subunit.L32	moderately similar to ( 225) AT4G18100 | Symbols: | 60S ribosomal protein L32 (RPL32A) | chr4:10035715-10036475 REVERSEmoderately similar to ( 263) loc_os08g41300 12008.m08108 protein 60S ribosomal protein L32, putative, expressed seq=cds; coord=2:191350704..191353166:1; parent_gene=GRMZM2G047971	2.18917e-09	2.15124e-08
GRMZM2G059117	GRMZM2G059117_T01	1.78131	6.74581	20.6309	58.2439	signalling.receptor kinases.leucine rich repeat XI	highly similar to ( 604) AT3G28040 | Symbols: | leucine-rich repeat transmembrane protein kinase, putative | chr3:10435139-10438268 FORWARDmoderately similar to ( 251) RPK1_IPONI Receptor-like protein kinase precursor (EC 2.7.11.1) - Ipomoea nil (Japanese morning glory) (Pharbitis nil)nearly identical (1331) loc_os01g72700 12001.m13304 protein ATP binding protein, putative, expressed seq=cds; coo…	2.26822e-24	8.13794e-23
GRMZM2G010105	GRMZM2G010105_T01	1.77759	2.59546	7.89866	11.8621	DNA.synthesis/chromatin structure	moderately similar to ( 322) AT1G65470 | Symbols: FAS1, NFB2 | FAS1 (FASCIATA 1); histone binding | chr1:24319906-24323879 REVERSEhighly similar to ( 610) loc_os01g67100 12001.m12813 protein expressed protein seq=cds; coord=8:164356753..164363486:-1; parent_gene=GRMZM2G010105	6.75584e-15	1.19415e-13
GRMZM2G017164	GRMZM2G017164_T01	1.7772	8.33268	25.4166	14.4945	signalling.receptor kinases.DUF 26	moderately similar to ( 346) AT5G60900 | Symbols: RLK1 | RLK1 (RECEPTOR-LIKE PROTEIN KINASE 1); ATP binding / carbohydrate binding / kinase/ protein kinase/ protein serine/threonine kinase/ protein tyrosine kinase/ sugar binding | chr5:24498467-24501494 REVERSEmoderately similar to ( 226) KPRO_MAIZE Putative receptor protein kinase ZmPK1 precursor (EC 2.7.11.1) - Zea mays (Maize)nearly identical …	4.12864e-23	1.37227e-21
GRMZM5G811633	GRMZM5G811633_T01	1.77547	4.83289	14.7077	28.3472	protein.degradation.ubiquitin.E3.RING	weakly similar to ( 178) AT3G19380 | Symbols: PUB25 | PUB25 (PLANT U-BOX 25); binding / ubiquitin-protein ligase | chr3:6714602-6715867 REVERSEvery weakly similar to (97.4) SPL11_ORYSA Spotted leaf protein 11 (Spotted leaf11) (Cell death-related protein SPL11) - Oryza sativa (Rice)moderately similar to ( 239) loc_os02g34410 12002.m08530 protein ubiquitin-protein ligase, putative, expressed seq=cd…	4.50283e-09	4.2498e-08
AC188831.3	AC188831.3_FGT005	1.77522	16.3016	49.6592	11.9379	not assigned.unknown	seq=cds; coord=2:9495924..9496382:-1; parent_gene=AC188831.3_FG005	1.94241e-11	2.43224e-10
GRMZM2G155783	GRMZM2G155783_T01	1.77422	2.75276	8.39034	5.29466	not assigned.unknown	moderately similar to ( 287) AT3G07790 | Symbols: | DGCR14-related | chr3:2487491-2489017 FORWARDmoderately similar to ( 408) loc_os06g30710 12006.m091709 protein DGCR14 protein, putative, expressed seq=cds; coord=4:239904721..239906455:1; parent_gene=GRMZM2G155783	2.8489e-08	2.41246e-07
GRMZM2G519210	GRMZM2G519210_T01	1.77376	15.6165	47.4942	16.6871	not assigned.unknown	very weakly similar to (89.0) loc_os05g18774 12005.m083672 protein protein phosphatase 1, regulatory subunit 11, putative, expressed seq=cds; coord=1:285074425..285077363:-1; parent_gene=GRMZM2G519210	3.36291e-15	6.12393e-14
GRMZM2G323415	GRMZM2G323415_T01	1.77239	16.6468	50.5482		not assigned.unknown	seq=cds; coord=8:129386628..129387965:-1; parent_gene=GRMZM2G323415	2.0707e-21	6.12588e-20
GRMZM2G359952	GRMZM2G359952_T01	1.77095	2.40897	7.30886	44.5316	RNA.regulation of transcription.MADS box transcription factor family	moderately similar to ( 281) AT4G18960 | Symbols: AG | AG (AGAMOUS); DNA binding / transcription factor | chr4:10383917-10388272 FORWARDmoderately similar to ( 367) MADS3_ORYSA MADS-box transcription factor 3 (OsMADS3) (Protein AGAMOUS-like) (RMADS222) - Oryza sativa (Rice)moderately similar to ( 399) loc_os01g10504 12001.m150506 protein MADS-box transcription factor 3, putative, expressed seq=cd…	1.37815e-06	8.85397e-06
GRMZM5G805485	GRMZM5G805485_T01	1.7672	124.267	377.755	166.456	cell wall.cell wall proteins.LRR	moderately similar to ( 387) AT1G12040 | Symbols: LRX1 | LRX1 (LEUCINE-RICH REPEAT/EXTENSIN 1); histidine phosphotransfer kinase/ protein binding / structural constituent of cell wall | chr1:4070160-4072394 FORWARDweakly similar to ( 112) RPK1_IPONI Receptor-like protein kinase precursor (EC 2.7.11.1) - Ipomoea nil (Japanese morning glory) (Pharbitis nil)highly similar to ( 563) loc_os02g04540 12…	4.04591e-47	4.99206e-45
GRMZM2G065718	GRMZM2G065718_T01	1.76512	16.9966	51.4643	46.9339	cell wall.cell wall proteins.AGPs.AGP	moderately similar to ( 245) AT3G60900 | Symbols: FLA10 | FLA10 | chr3:22499573-22500841 REVERSEmoderately similar to ( 342) loc_os03g03600 12003.m05893 protein fasciclin-like arabinogalactan protein 8 precursor, putative, expressed seq=cds; coord=1:5952987..5954672:1; parent_gene=GRMZM2G065718	1.56359e-25	6.05658e-24
GRMZM2G323679	GRMZM2G323679_T01	1.76193	33.9281	102.491	81.2679	nucleotide metabolism.deoxynucleotide metabolism.ribonucleoside-diphosphate reductase	highly similar to ( 540) AT3G27060 | Symbols: TSO2 | TSO2 (TSO meaning ugly in Chinese); oxidoreductase/ ribonucleoside-diphosphate reductase/ transition metal ion binding | chr3:9979971-9981057 REVERSEhighly similar to ( 547) RIR2_TOBAC Ribonucleoside-diphosphate reductase small chain (EC 1.17.4.1) (Ribonucleotide reductase small subunit) (Ribonucleoside-diphosphate reductase R2 subunit) - Nicot…	1.10341e-32	6.58247e-31
GRMZM2G365957	GRMZM2G365957_T01	1.7605	3.62901	10.9156	12.4206	transport.ABC transporters and multidrug resistance systems	nearly identical (1002) AT3G62700 | Symbols: ATMRP10 | ATMRP10; ATPase, coupled to transmembrane movement of substances | chr3:23190428-23195727 REVERSEweakly similar to ( 123) MDR_ORYSA Putative multidrug resistance protein (P-glycoprotein) - Oryza sativa (Rice)nearly identical (1480) loc_os04g13210 12004.m06561 protein multidrug resistance-associated protein 4, putative, expressed seq=cds; coor…	1.36784e-16	2.83359e-15
GRMZM2G121312	GRMZM2G121312_T01	1.75873	10.6766	32.1137	13.7716	signalling.receptor kinases.leucine rich repeat XI	moderately similar to ( 354) AT3G12610 | Symbols: DRT100 | DRT100 (DNA-DAMAGE REPAIR/TOLERATION 100); nucleotide binding / protein binding | chr3:4006661-4007779 REVERSEweakly similar to ( 134) PGIP1_ORYSA Polygalacturonase inhibitor 1 precursor (Polygalacturonase-inhibiting protein) (Floral organ regulator 1) - Oryza sativa (Rice)moderately similar to ( 493) loc_os08g39550 12008.m07936 protein p…	7.25052e-21	2.0793e-19
GRMZM2G453571	GRMZM2G453571_T01	1.75836	3.2227	9.69345		RNA.regulation of transcription.WRKY domain transcription factor family	weakly similar to ( 156) AT1G29860 | Symbols: WRKY71, ATWRKY71 | WRKY71; transcription factor | chr1:10454482-10455652 FORWARDmoderately similar to ( 218) loc_os05g49100 12005.m08980 protein OsWRKY49 - Superfamily of rice TFs having WRKY and zinc finger domains, expressed seq=cds; coord=6:164799868..164802835:1; parent_gene=GRMZM2G453571	4.13779e-08	3.42142e-07
GRMZM2G009045	GRMZM2G009045_T01	1.75577	18.0498	54.0042		transport.metabolite transporters at the mitochondrial membrane	moderately similar to ( 480) AT5G14040 | Symbols: | mitochondrial phosphate transporter | chr5:4531059-4532965 REVERSEhighly similar to ( 508) loc_os09g28160 12009.m05967 protein phosphate carrier protein, mitochondrial precursor, putative, expressed seq=cds; coord=7:125101929..125104115:1; parent_gene=GRMZM2G009045	4.76558e-26	1.90428e-24
GRMZM2G105987	GRMZM2G105987_T01	1.75446	19.8287	59.4126	10.3259	stress.biotic	weakly similar to ( 130) AT1G65690 | Symbols: | harpin-induced protein-related / HIN1-related / harpin-responsive protein-related | chr1:24431642-24432898 REVERSEweakly similar to ( 120) loc_os02g30450 12002.m08188 protein NHL25, putative seq=cds; coord=5:25028407..25030076:1; parent_gene=GRMZM2G105987	2.94855e-27	1.2948e-25
GRMZM2G006352	GRMZM2G006352_T01	1.75318	8.20088	24.5889	24.3786	RNA.regulation of transcription.MYB domain transcription factor family	moderately similar to ( 214) AT3G49690 | Symbols: RAX3, MYB84, ATMYB84 | MYB84 (MYB DOMAIN PROTEIN 84); DNA binding / transcription factor | chr3:18427941-18429100 FORWARDweakly similar to ( 167) MYB4_ORYSA Myb-related protein Myb4 (OsMyb4) (Transcription factor RLTR1) - Oryza sativa (Rice)moderately similar to ( 309) loc_os01g49160 12001.m11104 protein myb-like DNA-binding domain containing prot…	2.29794e-13	3.52908e-12
GRMZM5G838098	GRMZM5G838098_T03	1.75298	7.64488	22.9141		not assigned.unknown	weakly similar to ( 152) loc_os03g08320 12003.m06341 protein pnFL-2, putative, expressed seq=cds; coord=1:16783282..16784713:1; parent_gene=GRMZM5G838098	9.13605e-13	1.31002e-11
GRMZM2G123037	GRMZM2G123037_T01	1.75041	12.9183	38.6319		misc.cytochrome P450	moderately similar to ( 441) AT1G24540 | Symbols: CYP86C1 | CYP86C1; electron carrier/ heme binding / iron ion binding / monooxygenase/ oxygen binding | chr1:8699751-8701319 FORWARDweakly similar to ( 105) C72A1_CATRO Cytochrome P450 72A1 (EC 1.3.3.9) (CYPLXXII) (Secologanin synthase) (SLS) - Catharanthus roseus (Rosy periwinkle) (Madagascar periwinkle)highly similar to ( 648) loc_os02g38290 1200…	8.92579e-25	3.30555e-23
GRMZM2G114850	GRMZM2G114850_T01	1.74986	9.92791	29.7552	5.0251	RNA.regulation of transcription.NAC domain transcription factor family	moderately similar to ( 218) AT1G56010 | Symbols: NAC1, ANAC022 | NAC1; transcription factor | chr1:20946852-20949144 REVERSEweakly similar to ( 183) NAC77_ORYSA NAC domain-containing protein 77 (ONAC077) (ONAC300) - Oryza sativa (Rice)moderately similar to ( 369) loc_os12g41680 12012.m07949 protein NAC domain-containing protein 21/22, putative, expressed seq=cds; coord=3:122071793..122076122:1; …	1.68629e-19	4.37466e-18
GRMZM2G301934	GRMZM2G301934_T01	1.74824	57.496	171.875	31.2216	Biodegradation of Xenobiotics	moderately similar to ( 264) AT5G23530 | Symbols: AtCXE18 | AtCXE18 (Arabidopsis thaliana carboxyesterase 18); carboxylesterase | chr5:7933366-7934373 REVERSEweakly similar to ( 174) GID1_ORYSA Gibberellin receptor GID1 (EC 3.-.-.-) (Gibberellin-insensitive dwarf protein 1) (Protein GIBBERELLIN INSENSITIVE DWARF1) - Oryza sativa (Rice)moderately similar to ( 484) loc_os07g44910 12007.m079767 prot…	5.69641e-40	4.98564e-38
GRMZM2G099295	GRMZM2G099295_T01	1.74717	219.892	655.141	669.407	stress.biotic	moderately similar to ( 225) AT5G06870 | Symbols: PGIP2, ATPGIP2 | PGIP2 (POLYGALACTURONASE INHIBITING PROTEIN 2); protein binding | chr5:2133941-2135016 FORWARDhighly similar to ( 506) PGIP1_ORYSA Polygalacturonase inhibitor 1 precursor (Polygalacturonase-inhibiting protein) (Floral organ regulator 1) - Oryza sativa (Rice)highly similar to ( 506) loc_os07g38130 12007.m08062 protein polygalacturo…	1.31454e-46	1.59091e-44
GRMZM2G322672	GRMZM2G322672_T01	1.74552	26.2642	78.432	14.1801	RNA.regulation of transcription.AP2/EREBP, APETALA2/Ethylene-responsive element binding protein family	weakly similar to ( 111) loc_os06g47590 12006.m09285 protein ethylene-responsive transcription factor 3, putative, expressed seq=cds; coord=5:81761119..81763618:1; parent_gene=GRMZM2G322672	5.51816e-26	2.1946e-24
GRMZM2G401664	GRMZM2G401664_T01	1.7431	6.97104	20.7583	17.2012	lipid metabolism.lipid degradation.lysophospholipases	moderately similar to ( 429) AT4G38690 | Symbols: | 1-phosphatidylinositol phosphodiesterase-related | chr4:18074743-18075699 REVERSEhighly similar to ( 532) loc_os09g36520 12009.m06601 protein ki1 protein, putative, expressed seq=cds; coord=7:143820122..143821948:-1; parent_gene=GRMZM2G401664	7.94102e-16	1.54389e-14
GRMZM2G364748	GRMZM2G364748_T01	1.74183	165.084	491.76	27.6697	cell wall.modification	moderately similar to ( 253) AT5G57540 | Symbols: | xyloglucan:xyloglucosyl transferase, putative / xyloglucan endotransglycosylase, putative / endo-xyloglucan transferase, putative | chr5:23302996-23304049 REVERSEmoderately similar to ( 375) XTH8_ORYSA Xyloglucan endotransglycosylase/hydrolase protein 8 precursor (EC 2.4.1.207) (End-xyloglucan transferase) (OsXTH8) (OsXRT5) - Oryza sativa (Rice)…	4.21512e-46	5.02911e-44
GRMZM2G031065	GRMZM2G031065_T01	1.74004	7.21081	21.4181	2.96547	not assigned.unknown	weakly similar to ( 194) AT1G47480 | Symbols: | hydrolase | chr1:17417623-17419296 FORWARDweakly similar to ( 105) GID1_ORYSA Gibberellin receptor GID1 (EC 3.-.-.-) (Gibberellin-insensitive dwarf protein 1) (Protein GIBBERELLIN INSENSITIVE DWARF1) - Oryza sativa (Rice)moderately similar to ( 432) loc_os08g37040 12008.m07691 protein gibberellin receptor GID1L2, putative, expressed seq=cds; coord=1…	1.69291e-13	2.6222e-12
GRMZM5G800211	GRMZM5G800211_T01	1.73842	53.186	157.829	1.98742	not assigned.unknown	weakly similar to ( 130) AT5G42860 | Symbols: | unknown protein | chr5:17183339-17184857 REVERSEmoderately similar to ( 204) loc_os04g35130 12004.m08603 protein expressed protein seq=cds; coord=10:116866244..116868159:1; parent_gene=GRMZM5G800211	5.11067e-38	4.0908e-36
GRMZM2G148800	GRMZM2G148800_T01	1.7375	6.50663	19.3169	2.2241	transport.peptides and oligopeptides	highly similar to ( 513) AT1G22540 | Symbols: | proton-dependent oligopeptide transport (POT) family protein | chr1:7964202-7966222 FORWARDhighly similar to ( 777) loc_os01g65110 12001.m12624 protein POT family protein, expressed seq=cds; coord=8:165993687..165995931:-1; parent_gene=GRMZM2G148800	4.01571e-15	7.23457e-14
GRMZM2G170646	GRMZM2G170646_T01	1.73605	12.7361	37.7533	10.8376	misc.GDSL-motif lipase	moderately similar to ( 272) AT1G28580 | Symbols: | GDSL-motif lipase, putative | chr1:10044603-10045874 REVERSEweakly similar to ( 134) EST_HEVBR Esterase precursor (EC 3.1.1.-) (Early nodule-specific protein homolog) (Latex allergen Hev b 13) - Hevea brasiliensis (Para rubber tree)highly similar to ( 645) loc_os05g11950 12005.m083651 protein esterase precursor, putative, expressed seq=cds; coor…	1.40554e-21	4.21229e-20
GRMZM2G147862	GRMZM2G147862_T01	1.73384	9.19148	27.2214	4.17518	signalling.G-proteins	very weakly similar to (94.4) AT5G07110 | Symbols: PRA1.B6 | PRA1.B6 (PRENYLATED RAB ACCEPTOR 1.B6) | chr5:2206121-2206771 FORWARDmoderately similar to ( 241) loc_os03g53070 12003.m10281 protein prenylated Rab receptor 2, putative, expressed seq=cds; coord=5:7860295..7862439:-1; parent_gene=GRMZM2G147862	3.14422e-15	5.73526e-14
GRMZM2G148925	GRMZM2G148925_T01	1.7315	188.525	555.768	140.329	protein.degradation.cysteine protease	weakly similar to ( 128) loc_os03g31510 12003.m08398 protein cystatin, putative, expressed seq=cds; coord=1:79067709..79069201:-1; parent_gene=GRMZM2G148925	1.74758e-45	2.00924e-43
GRMZM5G842961	GRMZM5G842961_T01	1.73003	8.01733	23.6557	10.2417	RNA.regulation of transcription.AP2/EREBP, APETALA2/Ethylene-responsive element binding protein family	weakly similar to ( 136) AT2G44940 | Symbols: | AP2 domain-containing transcription factor TINY, putative | chr2:18537294-18538181 FORWARDvery weakly similar to (80.9) ERF1_ORYSA Ethylene-responsive transcription factor 1 (Ethylene-responsive element-binding factor 1) (EREBP-1) (OsEREBP1) - Oryza sativa (Rice)moderately similar to ( 204) loc_os02g43940 12002.m09429 protein transcriptional factor …	5.52371e-10	5.80942e-09
GRMZM2G059397	GRMZM2G059397_T01	1.72799	301.775	888.247	31.6758	development.unspecified	weakly similar to ( 143) AT2G23810 | Symbols: TET8 | TET8 (TETRASPANIN8) | chr2:10135859-10137352 REVERSEweakly similar to ( 181) loc_os08g34460 12008.m07435 protein senescence-associated protein DH, putative, expressed seq=cds; coord=1:210740384..210741599:1; parent_gene=GRMZM2G059397	3.44415e-46	4.12873e-44
GRMZM2G086876	GRMZM2G086876_T01	1.72788	2.27655	6.70588	3.0198	RNA.regulation of transcription.putative transcription regulator	weakly similar to ( 109) AT2G45850 | Symbols: | DNA-binding family protein | chr2:18871901-18873457 REVERSEmoderately similar to ( 362) loc_os04g58730 12004.m35526 protein DNA binding protein, putative, expressed seq=cds; coord=2:840831..843688:1; parent_gene=GRMZM2G086876	1.28383e-07	9.83139e-07
GRMZM2G098039	GRMZM2G098039_T01	1.72758	10.1889	30.0339	47.8329	amino acid metabolism.synthesis.aspartate family.methionine	nearly identical (1293) AT5G49810 | Symbols: MMT | MMT; S-adenosylmethionine-dependent methyltransferase | chr5:20239418-20246046 FORWARDnearly identical (2034) MMT1_MAIZE Methionine S-methyltransferase (EC 2.1.1.12) (AdoMet:Met S-methyltransferase) - Zea mays (Maize)nearly identical (1780) loc_os05g01470 12005.m27665 protein methionine S-methyltransferase, putative, expressed seq=cds; coord=8:13…	5.66704e-28	2.67429e-26
GRMZM2G122897	GRMZM2G122897_T01	1.72733	7.91853	23.3182	40.3045	RNA.regulation of transcription.HB,Homeobox transcription factor family	highly similar to ( 729) AT4G21750 | Symbols: ATML1 | ATML1 (MERISTEM LAYER 1); DNA binding / sequence-specific DNA binding / transcription factor | chr4:11556965-11560243 FORWARDhighly similar to ( 850) loc_os04g53540 12004.m101662 protein homeobox protein GLABRA2, putative, expressed seq=cds; coord=10:143385947..143390709:-1; parent_gene=GRMZM2G122897	7.75705e-22	2.3526e-20
GRMZM2G319786	GRMZM2G319786_T01	1.72696	5.04511	14.8378		not assigned.unknown	seq=cds; coord=4:151713456..151714591:1; parent_gene=GRMZM2G319786	6.44778e-09	5.98057e-08
GRMZM2G316555	GRMZM2G316555_T01	1.72348	3.77971	11.096		protein.degradation.ubiquitin.E3.SCF.FBOX	very weakly similar to (82.4) AT2G36090 | Symbols: | F-box family protein | chr2:15158631-15159584 FORWARDmoderately similar to ( 210) loc_os11g05660 12011.m04763 protein F-box domain containing protein, expressed seq=cds; coord=4:189229419..189230471:-1; parent_gene=GRMZM2G316555	9.11001e-07	6.04108e-06
GRMZM2G313481	GRMZM2G313481_T01	1.7229	20.6971	60.9201	1.21596	not assigned.unknown	moderately similar to ( 291) AT1G14590 | Symbols: | FUNCTIONS IN: molecular_function unknown; INVOLVED IN: biological_process unknown; LOCATED IN: chloroplast thylakoid lumen; CONTAINS InterPro DOMAIN/s: Nucleotide-diphospho-sugar transferase, predicted (InterPro:IPR005069); BEST Arabidopsis thaliana protein match is: unknown protein (TAIR:AT2G02061.1); Has 179 Blast hits to 175 proteins in 14 sp…	6.31585e-27	2.69853e-25
GRMZM2G014240	GRMZM2G014240_T01	1.72274	110.077	323.121	143.899	transport.amino acids	nearly identical (1266) AT1G15690 | Symbols: AVP1, ATAVP3, AVP-3 | AVP1; ATPase/ hydrogen-translocating pyrophosphatase | chr1:5399115-5402185 FORWARDnearly identical (1333) AVP_HORVU Pyrophosphate-energized vacuolar membrane proton pump (EC 3.6.1.1) (Pyrophosphate-energized inorganic pyrophosphatase) (H(+)-PPase) - Hordeum vulgare (Barley)nearly identical (1354) loc_os06g08080 12006.m31844 prote…	1.79748e-45	2.04799e-43
GRMZM2G015886	GRMZM2G015886_T01	1.72105	7.12106	20.9179	66.2593	cell wall.cellulose synthesis.cellulose synthase	nearly identical (1518) AT1G02730 | Symbols: ATCSLD5, CSLD5 | ATCSLD5; 1,4-beta-D-xylan synthase/ cellulose synthase | chr1:594697-598473 REVERSEnearly identical (1830) loc_os12g36890 12012.m07474 protein CSLD4 - cellulose synthase-like family D, expressed seq=cds; coord=10:22261833..22266237:1; parent_gene=GRMZM2G015886	6.66918e-25	2.48806e-23
GRMZM2G149422	GRMZM2G149422_T01	1.71851	46.4081	135.214	6.42989	signalling.in sugar and nutrient physiology	moderately similar to ( 310) AT4G08950 | Symbols: EXO | EXO (EXORDIUM) | chr4:5740378-5741322 FORWARDmoderately similar to ( 447) loc_os02g52010 12002.m10232 protein phi-1-like phosphate-induced protein, putative, expressed seq=cds; coord=4:180235957..180237510:-1; parent_gene=GRMZM2G149422	1.12595e-34	7.55175e-33
GRMZM2G459474	GRMZM2G459474_T01	1.71601	35.5065	103.719	78.4077	not assigned.unknown	seq=cds; coord=4:141270518..141271481:1; parent_gene=GRMZM2G459474	3.09652e-26	1.26532e-24
GRMZM2G145412	GRMZM2G145412_T01	1.71409	126.884	369.859	8.58101	not assigned.unknown	seq=cds; coord=1:244826496..244827697:-1; parent_gene=GRMZM2G145412	1.19876e-40	1.08679e-38
GRMZM2G371079	GRMZM2G371079_T01	1.71252	99.6228	290.252	67.8265	not assigned.unknown	seq=cds; coord=8:161469744..161470558:-1; parent_gene=GRMZM2G371079	1.62044e-35	1.15133e-33
GRMZM2G171324	GRMZM2G171324_T01	1.71111	6.50114	18.9079	13.2661	not assigned.unknown	weakly similar to ( 152) AT2G33360 | Symbols: | unknown protein | chr2:14140901-14142870 FORWARDhighly similar to ( 696) loc_os03g04600 12003.m05988 protein expressed protein seq=cds; coord=1:8621974..8626677:-1; parent_gene=GRMZM2G171324	4.2774e-20	1.16587e-18
GRMZM2G092752	GRMZM2G092752_T01	1.71048	26.5104	76.9844	12.6457	not assigned.unknown	seq=cds; coord=7:162322373..162324347:-1; parent_gene=GRMZM2G092752	9.39787e-25	3.47529e-23
GRMZM2G451975	GRMZM2G451975_T01	1.71036	82.9012	241.362	47.0381	not assigned.unknown	moderately similar to ( 261) AT2G41640 | Symbols: | transferase, transferring glycosyl groups | chr2:17360654-17362391 FORWARDmoderately similar to ( 463) loc_os01g72610 12001.m13296 protein glycosyltransferase, putative, expressed seq=cds; coord=3:32720309..32722165:1; parent_gene=GRMZM2G451975	1.54495e-40	1.38085e-38
GRMZM2G020091	GRMZM2G020091_T01	1.70948	38.314	111.534	7.02158	development.unspecified	moderately similar to ( 302) AT3G45600 | Symbols: TET3 | TET3 (TETRASPANIN3) | chr3:16733973-16735854 REVERSEmoderately similar to ( 446) loc_os05g03140 12005.m04848 protein senescence-associated protein, putative, expressed seq=cds; coord=6:28129674..28174167:-1; parent_gene=GRMZM2G020091	1.88355e-31	1.06583e-29
GRMZM2G165413	GRMZM2G165413_T01	1.70908	1.93708	5.63679	1.3681	not assigned.unknown	highly similar to ( 857) AT2G33420 | Symbols: | FUNCTIONS IN: molecular_function unknown; INVOLVED IN: biological_process unknown; LOCATED IN: cellular_component unknown; EXPRESSED IN: 9 plant structures; EXPRESSED DURING: L mature pollen stage, M germinated pollen stage, 4 anthesis, C globular stage, petal differentiation and expansion stage; CONTAINS InterPro DOMAIN/s: Munc13 homology 1 (InterP…	7.7659e-10	8.03726e-09
GRMZM2G175593	GRMZM2G175593_T01	1.70865	21.8925	63.5904	6.95463	protein.degradation.AAA type	moderately similar to ( 364) AT3G50930 | Symbols: BCS1 | BCS1 (CYTOCHROME BC1 SYNTHESIS); ATP binding / ATPase/ nucleoside-triphosphatase/ nucleotide binding | chr3:18929817-18931547 FORWARDhighly similar to ( 518) loc_os05g51130 12005.m09179 protein mitochondrial chaperone BCS1, putative, expressed seq=cds; coord=6:167861624..167863431:1; parent_gene=GRMZM2G175593	3.38532e-27	1.47189e-25
GRMZM2G132693	GRMZM2G132693_T01	1.70776	6.78301	19.6823		RNA.regulation of transcription.AS2,Lateral Organ Boundaries Gene Family	moderately similar to ( 205) AT1G67100 | Symbols: LBD40 | LBD40 (LOB DOMAIN-CONTAINING PROTEIN 40) | chr1:25053801-25054659 FORWARDmoderately similar to ( 330) loc_os01g03890 12001.m07025 protein seed specific protein Bn15D17A, putative seq=cds; coord=3:23101310..23102645:-1; parent_gene=GRMZM2G132693	2.85591e-11	3.50497e-10
GRMZM2G359986	GRMZM2G359986_T01	1.70533	3.50286	10.1491	8.61171	signalling.receptor kinases.wall associated kinase	moderately similar to ( 494) AT3G53840 | Symbols: | protein kinase family protein | chr3:19945571-19947719 FORWARDmoderately similar to ( 228) CRI4_MAIZE Putative receptor protein kinase CRINKLY4 precursor (EC 2.7.11.1) - Zea mays (Maize)highly similar to ( 818) loc_os05g25390 12005.m06832 protein protein kinase, putative, expressed seq=cds; coord=4:67649300..67653040:-1; parent_gene=GRMZM2G359986	1.04939e-10	1.20816e-09
GRMZM2G148087	GRMZM2G148087_T01	1.70413	11.6851	33.8267	1.00368	RNA.regulation of transcription.WRKY domain transcription factor family	moderately similar to ( 318) AT2G38470 | Symbols: WRKY33, ATWRKY33 | WRKY33; transcription factor | chr2:16108476-16110539 FORWARDhighly similar to ( 617) loc_os01g61080 12001.m12235 protein OsWRKY24 - Superfamily of rice TFs having WRKY and zinc finger domains, expressed seq=cds; coord=3:183888339..183891343:-1; parent_gene=GRMZM2G148087	1.02305e-22	3.31756e-21
GRMZM2G172945	GRMZM2G172945_T01	1.7039	3.6467	10.5575	12.8053	not assigned.unknown	weakly similar to ( 126) loc_os07g29190 12007.m07190 protein expressed protein seq=cds; coord=2:199163539..199165033:1; parent_gene=GRMZM2G172945	8.31604e-08	6.57948e-07
GRMZM2G090609	GRMZM2G090609_T01	1.69976	3.35302	9.68202		development.unspecified	weakly similar to ( 161) AT1G70670 | Symbols: | caleosin-related family protein | chr1:26644830-26645970 FORWARDmoderately similar to ( 243) loc_os02g50174 12002.m10050 protein caleosin related protein, expressed seq=cds; coord=5:205154533..205156657:1; parent_gene=GRMZM2G090609	1.33271e-06	8.59716e-06
GRMZM5G846057	GRMZM5G846057_T01	1.69481	9.24863	26.6309	1.36756	RNA.regulation of transcription.AP2/EREBP, APETALA2/Ethylene-responsive element binding protein family	weakly similar to ( 124) AT1G64380 | Symbols: | AP2 domain-containing transcription factor, putative | chr1:23890981-23891988 REVERSEvery weakly similar to (85.5) ERF1_ORYSA Ethylene-responsive transcription factor 1 (Ethylene-responsive element-binding factor 1) (EREBP-1) (OsEREBP1) - Oryza sativa (Rice)moderately similar to ( 238) loc_os05g49700 12005.m09040 protein DNA binding protein, putativ…	8.4961e-16	1.64801e-14
GRMZM2G114113	GRMZM2G114113_T01	1.69453	7.22785	20.7196	17.7514	not assigned.unknown	moderately similar to ( 275) loc_os02g47130 12002.m09748 protein expressed protein seq=cds; coord=5:199767207..199770831:1; parent_gene=GRMZM2G114113	1.81416e-18	4.41225e-17
GRMZM2G171440	GRMZM2G171440_T01	1.69403	12.4053	35.7039	9.23388	secondary metabolism.wax	moderately similar to ( 214) AT5G55350 | Symbols: | membrane bound O-acyl transferase (MBOAT) family protein / wax synthase-related | chr5:22442356-22443393 REVERSEmoderately similar to ( 463) loc_os02g25700 12002.m07714 protein acyltransferase, putative, expressed seq=cds; coord=9:153836245..153837553:-1; parent_gene=GRMZM2G171440	3.42811e-17	7.4175e-16
GRMZM5G844046	GRMZM5G844046_T01	1.6907	22.8894	65.7657	7.95435	not assigned.unknown	seq=cds; coord=5:83023500..83023965:-1; parent_gene=GRMZM5G844046	4.51332e-13	6.71924e-12
GRMZM2G064202	GRMZM2G064202_T01	1.68797	3.73936	10.721	1.04703	misc.beta 1,3 glucan hydrolases.glucan endo-1,3-beta-glucosidase	moderately similar to ( 494) AT5G24318 | Symbols: | catalytic/ cation binding / hydrolase, hydrolyzing O-glycosyl compounds | chr5:8282390-8283956 REVERSEmoderately similar to ( 421) E13B_WHEAT Glucan endo-1,3-beta-glucosidase precursor (EC 3.2.1.39) ((1->3)-beta-glucan endohydrolase) ((1->3)-beta-glucanase) (Beta-1,3-endoglucanase) - Triticum aestivum (Wheat)moderately similar to ( 423) loc_os11…	2.81704e-10	3.0846e-09
GRMZM2G176486	GRMZM2G176486_T01	1.68695	11.2013	32.2105	76.8013	signalling.phosphinositides.phosphatidylinositol-4-phosphate 5-kinase	moderately similar to ( 348) AT1G21920 | Symbols: | MORN (Membrane Occupation and Recognition Nexus) repeat-containing protein /phosphatidylinositol-4-phosphate 5-kinase-related | chr1:7704454-7705866 REVERSEvery weakly similar to (89.4) PI5K1_ORYSA Phosphatidylinositol-4-phosphate 5-kinase 1 precursor (EC 2.7.1.68) (1-phosphatidylinositol-4-phosphate kinase) (PIP5K) (PtdIns(4)P-5-kinase) (Diphos…	2.55872e-20	7.09652e-19
GRMZM2G098875	GRMZM2G098875_T02	1.68626	58.1982	166.585		amino acid metabolism.synthesis.central amino acid metabolism.GABA.Glutamate decarboxylase	highly similar to ( 830) AT5G17330 | Symbols: GAD, GAD1 | GAD; calmodulin binding / glutamate decarboxylase | chr5:5711141-5714839 FORWARDhighly similar to ( 815) DCE_PETHY Glutamate decarboxylase (EC 4.1.1.15) (GAD) - Petunia hybrida (Petunia)highly similar to ( 912) loc_os03g13300 12003.m06776 protein glutamate decarboxylase, putative, expressed seq=cds; coord=9:144297761..144300231:-1; parent_…	3.16726e-37	2.43504e-35
GRMZM2G178025	GRMZM2G178025_T01	1.68448	22.3047	63.7529	6.92913	cell wall.cellulose synthesis	highly similar to ( 684) AT5G49720 | Symbols: ATGH9A1, DEC, KOR, RSW2, IRX2, KOR1 | ATGH9A1 (ARABIDOPSIS THALIANA GLYCOSYL HYDROLASE 9A1); cellulase/ hydrolase, hydrolyzing O-glycosyl compounds | chr5:20197765-20200168 REVERSEnearly identical (1052) GUN12_ORYSA Endoglucanase 12 (EC 3.2.1.4) (Endo-1,4-beta glucanase 12) (OsGLU3) - Oryza sativa (Rice)nearly identical (1041) loc_os04g41970 12004.m09…	1.63166e-31	9.25366e-30
GRMZM2G383088	GRMZM2G383088_T01	1.68393	28.9594	82.7507	52.9827	transport.metabolite transporters at the mitochondrial membrane	highly similar to ( 711) AT5G12860 | Symbols: DiT1 | DiT1 (dicarboxylate transporter 1); oxoglutarate:malate antiporter | chr5:4059850-4061919 REVERSEhighly similar to ( 719) SOT1_SPIOL 2-oxoglutarate/malate translocator, chloroplast precursor - Spinacia oleracea (Spinach)highly similar to ( 779) loc_os12g33080 12012.m07106 protein 2-oxoglutarate/malate translocator, chloroplast precursor, putati…	1.39822e-31	7.98341e-30
GRMZM2G089698	GRMZM2G089698_T01	1.68235	17.5067	49.9152	6.18434	secondary metabolism.phenylpropanoids.lignin biosynthesis.HCT	moderately similar to ( 271) AT5G48930 | Symbols: HCT | HCT (HYDROXYCINNAMOYL-COA SHIKIMATE/QUINATE HYDROXYCINNAMOYL TRANSFERASE); quinate O-hydroxycinnamoyltransferase/ shikimate O-hydroxycinnamoyltransferase/ transferase | chr5:19836654-19838092 REVERSEmoderately similar to ( 207) HCBT1_DIACA Anthranilate N-benzoyltransferase protein 1 (EC 2.3.1.144) (Anthranilate N-hydroxycinnamoyl/benzoyltran…	4.50359e-24	1.58654e-22
GRMZM2G383680	GRMZM2G383680_T01	1.68097	3.48907	9.95494		redox.glutaredoxins	weakly similar to ( 136) AT5G39865 | Symbols: | glutaredoxin family protein | chr5:15965560-15966732 REVERSEmoderately similar to ( 263) loc_os06g12190 12006.m05936 protein glutaredoxin, putative, expressed seq=cds; coord=6:112434261..112435857:1; parent_gene=GRMZM2G383680	2.71286e-08	2.3042e-07
GRMZM2G139160	GRMZM2G139160_T01	1.68006	2.86505	8.15808	6.86413	RNA.regulation of transcription.C2H2 zinc finger family	moderately similar to ( 322) AT5G54630 | Symbols: | zinc finger protein-related | chr5:22192607-22194260 REVERSEhighly similar to ( 574) loc_os01g57650 12001.m11914 protein nucleic acid binding protein, putative, expressed seq=cds; coord=8:171805293..171810996:1; parent_gene=GRMZM2G139160	1.81633e-07	1.35563e-06
GRMZM5G862956	GRMZM5G862956_T01	1.67453	24.2171	68.7881	12.8972	not assigned.unknown	weakly similar to ( 187) loc_os01g39290 12001.m10207 protein harpin-induced protein, putative, expressed seq=cds; coord=3:219741113..219742624:-1; parent_gene=GRMZM5G862956	1.14551e-25	4.47829e-24
AC209208.3	AC209208.3_FGT003	1.67161	4.92825	13.9604		protein.degradation.subtilases	moderately similar to ( 421) AT1G04110 | Symbols: SDD1 | SDD1 (STOMATAL DENSITY AND DISTRIBUTION); serine-type endopeptidase | chr1:1061457-1063784 REVERSEhighly similar to ( 959) loc_os02g44590 12002.m09499 protein subtilisin-like protease precursor, putative, expressed seq=cds; coord=5:193299131..193301682:1; parent_gene=AC209208.3_FG003	3.11376e-14	5.19865e-13
GRMZM2G122072	GRMZM2G122072_T01	1.67108	28.9894	82.04	2.72991	misc.UDP glucosyl and glucoronyl transferases	moderately similar to ( 322) AT3G16520 | Symbols: UGT88A1 | UDP-glucoronosyl/UDP-glucosyl transferase family protein | chr3:5618847-5620833 REVERSEweakly similar to ( 177) ZOX_PHAVU Zeatin O-xylosyltransferase (EC 2.4.2.40) (Zeatin O-beta-D-xylosyltransferase) - Phaseolus vulgaris (Kidney bean) (French bean)highly similar to ( 655) loc_os01g53350 12001.m150707 protein anthocyanidin 5,3-O-glucosyl…	2.63622e-35	1.84711e-33
GRMZM2G055255	GRMZM2G055255_T01	1.67007	18.59	52.585	46.4467	not assigned.unknown	seq=cds; coord=7:46339898..46340702:-1; parent_gene=GRMZM2G055255	5.77762e-16	1.13727e-14
GRMZM2G002427	GRMZM2G002427_T01	1.66892	3.82	10.8069	5.01672	protein.degradation.ubiquitin.E3.SCF.FBOX	weakly similar to ( 178) AT4G05490 | Symbols: | F-box family protein (FBL22) | chr4:2771044-2772252 REVERSEmoderately similar to ( 404) loc_os02g21240 12002.m07364 protein ubiquitin-protein ligase, putative, expressed seq=cds; coord=8:129414617..129417699:1; parent_gene=GRMZM2G002427	2.58928e-08	2.20219e-07
GRMZM2G010363	GRMZM2G010363_T01	1.66574	15.84	44.7539	103.057	transport.misc	moderately similar to ( 410) AT5G47730 | Symbols: | SEC14 cytosolic factor, putative / polyphosphoinositide-binding protein, putative | chr5:19334592-19336158 REVERSEhighly similar to ( 528) loc_os09g08390 12009.m059943 protein SEC14 cytosolic factor, putative, expressed seq=cds; coord=2:154601868..154610777:1; parent_gene=GRMZM2G010363	1.41709e-22	4.54294e-21
GRMZM2G143328	GRMZM2G143328_T01	1.6656	28.0531	79.3172	17.3941	RNA.regulation of transcription.MYB domain transcription factor family	weakly similar to ( 183) AT3G27810 | Symbols: ATMYB21, ATMYB3, MYB21 | ATMYB21 (ARABIDOPSIS THALIANA MYB DOMAIN PROTEIN 21); DNA binding / transcription factor | chr3:10307596-10310093 FORWARDweakly similar to ( 148) MYBA2_ORYSA Myb-related protein MYBAS2 - Oryza sativa (Rice)moderately similar to ( 218) loc_os01g45090 12001.m10715 protein transcription factor MYB21, putative, expressed seq=cds; …	2.53145e-21	7.46277e-20
GRMZM2G158662	GRMZM2G158662_T01	1.66352	20.313	57.423	63.5286	signalling.light	moderately similar to ( 404) AT2G47590 | Symbols: PHR2 | PHR2 (photolyase/blue-light receptor 2); DNA photolyase | chr2:19521888-19523732 FORWARDmoderately similar to ( 206) CRYD_ORYSA Cryptochrome DASH, chloroplast/mitochondrial precursor - Oryza sativa (Rice)highly similar to ( 726) loc_os03g22330 12003.m07635 protein photolyase/blue-light receptor PHR2, putative, expressed seq=cds; coord=1:574…	4.26489e-26	1.71777e-24
GRMZM2G047152	GRMZM2G047152_T01	1.66196	3.25439	9.15383	12.1094	stress.biotic	moderately similar to ( 379) AT3G14470 | Symbols: | disease resistance protein (NBS-LRR class), putative | chr3:4857940-4861104 FORWARDnearly identical (1194) loc_os05g34220 12005.m27824 protein disease resistance protein, putative, expressed seq=cds; coord=8:104460886..104464505:-1; parent_gene=GRMZM2G047152	1.15299e-13	1.81028e-12
GRMZM2G381739	GRMZM2G381739_T01	1.66154	81.4328	228.896	9.17098	protein.degradation.aspartate protease	moderately similar to ( 294) AT3G12700 | Symbols: | aspartyl protease family protein | chr3:4037136-4038387 FORWARDhighly similar to ( 511) loc_os05g48330 12005.m08904 protein pepsin A, putative, expressed seq=cds; coord=6:163815718..163818674:-1; parent_gene=GRMZM2G381739	4.57767e-37	3.49812e-35
GRMZM2G026881	GRMZM2G026881_T01	1.66043	13.0572	36.6561	24.4778	not assigned.unknown	moderately similar to ( 231) AT3G50220 | Symbols: | unknown protein | chr3:18617672-18618640 REVERSEmoderately similar to ( 404) loc_os06g47310 12006.m09257 protein plant-specific domain TIGR01627 family protein, expressed seq=cds; coord=5:50450300..50452070:-1; parent_gene=GRMZM2G026881	1.59897e-19	4.16522e-18
GRMZM2G166159	GRMZM2G166159_T01	1.66027	15.3928	43.2557	42.8651	transport.unspecified anions	nearly identical (1080) AT3G62270 | Symbols: | anion exchange family protein | chr3:23042528-23045633 REVERSEnearly identical (1278) loc_os12g37840 12012.m26773 protein boron transporter 1, putative, expressed seq=cds; coord=1:149312438..149317160:1; parent_gene=GRMZM2G166159	1.02193e-27	4.66583e-26
GRMZM2G404126	GRMZM2G404126_T01	1.65999	44.8012	125.706	13.5557	not assigned.unknown	very weakly similar to (96.3) loc_os05g47960 12005.m08868 protein expressed protein seq=cds; coord=3:207547850..207548812:-1; parent_gene=GRMZM2G404126	4.11544e-27	1.77942e-25
GRMZM2G066024	GRMZM2G066024_T01	1.65559	358.69	1004.65	484.345	glycolysis.cytosolic branch.aldolase	highly similar to ( 574) AT2G36460 | Symbols: | fructose-bisphosphate aldolase, putative | chr2:15296929-15297732 REVERSEhighly similar to ( 700) ALF_MAIZE Fructose-bisphosphate aldolase, cytoplasmic isozyme (EC 4.1.2.13) - Zea mays (Maize)highly similar to ( 667) loc_os05g33380 12005.m07570 protein fructose-bisphosphate aldolase cytoplasmic isozyme, putative, expressed seq=cds; coord=8:163307256…	6.25767e-44	6.59506e-42
GRMZM2G386590	GRMZM2G386590_T01	1.65529	4.76774	13.3431	2.51816	signalling.14-3-3 proteins	very weakly similar to (97.1) AT1G78300 | Symbols: GRF2, 14-3-3OMEGA, GF14 OMEGA | GRF2 (GENERAL REGULATORY FACTOR 2); protein binding / protein phosphorylated amino acid binding | chr1:29461883-29463052 FORWARDweakly similar to ( 108) 14331_ORYSA 14-3-3-like protein GF14-A (G-box factor 14-3-3 homolog A) - Oryza sativa (Rice)weakly similar to ( 108) loc_os08g37490 12008.m07735 protein 14-3-3-lik…	7.6666e-10	7.94099e-09
GRMZM2G136513	GRMZM2G136513_T01	1.65262	3.49082	9.76051	23.2436	stress.biotic	moderately similar to ( 318) AT4G26090 | Symbols: RPS2 | RPS2 (RESISTANT TO P. SYRINGAE 2); protein binding | chr4:13224596-13227325 FORWARDnearly identical (1303) loc_os03g14900 12003.m06927 protein disease resistance protein RPS2, putative, expressed seq=cds; coord=1:35132532..35136898:-1; parent_gene=GRMZM2G136513	6.34374e-13	9.28042e-12
GRMZM2G302604	GRMZM2G302604_T01	1.65115	12.9229	36.0606	15.604	transport.sugars	highly similar to ( 553) AT3G18830 | Symbols: ATPLT5 | ATPLT5 (POLYOL TRANSPORTER 5); D-ribose transmembrane transporter/ D-xylose transmembrane transporter/ carbohydrate transmembrane transporter/ galactose transmembrane transporter/ glucose transmembrane transporter/ glycerol transmembrane transporter/ mann | chr3:6489000-6491209 REVERSEweakly similar to ( 158) STA_RICCO Sugar carrier protein A…	1.73262e-21	5.15586e-20
GRMZM2G095261	GRMZM2G095261_T01	1.6501	2.76528	7.72349	2.89932	misc.UDP glucosyl and glucoronyl transferases	moderately similar to ( 269) AT1G07250 | Symbols: UGT71C4 | UGT71C4 (UDP-GLUCOSYL TRANSFERASE 71C4); quercetin 3-O-glucosyltransferase/ quercetin 7-O-glucosyltransferase/ transferase, transferring glycosyl groups | chr1:2225963-2227402 FORWARDweakly similar to ( 139) ZOX_PHAVU Zeatin O-xylosyltransferase (EC 2.4.2.40) (Zeatin O-beta-D-xylosyltransferase) - Phaseolus vulgaris (Kidney bean) (French…	1.17234e-06	7.62587e-06
GRMZM5G819807	GRMZM5G819807_T01	1.64981	4.80512	13.3882	12.4168	protein.degradation.serine protease	moderately similar to ( 307) AT4G17040 | Symbols: | ATP-dependent Clp protease proteolytic subunit, putative | chr4:9586740-9589297 REVERSEvery weakly similar to (99.4) CLPP_CHLVU ATP-dependent Clp protease proteolytic subunit (EC 3.4.21.92) (Endopeptidase Clp) - Chlorella vulgaris (Green alga)moderately similar to ( 377) loc_os01g16530 12001.m08249 protein ATP-dependent Clp protease proteolytic …	2.51851e-08	2.14778e-07
GRMZM2G075513	GRMZM2G075513_T01	1.64097	19.2819	53.4584	16.9734	secondary metabolism.flavonoids.anthocyanins.anthocyanin 5-aromatic acyltransferase	weakly similar to ( 186) AT3G29670 | Symbols: | transferase family protein | chr3:11527952-11529307 FORWARDhighly similar to ( 535) loc_os02g57480 12002.m10770 protein anthocyanin 5-aromatic acyltransferase, putative, expressed seq=cds; coord=4:170814386..170816284:1; parent_gene=GRMZM2G075513	1.39537e-24	5.07105e-23
GRMZM2G154036	GRMZM2G154036_T01	1.63989	15.5148	43.0508	15.8474	not assigned.unknown	weakly similar to ( 120) AT4G14746 | Symbols: | INVOLVED IN: biological_process unknown; LOCATED IN: anchored to membrane; CONTAINS InterPro DOMAIN/s: EGF (InterPro:IPR006210); Has 201 Blast hits to 179 proteins in 41 species: Archae - 0; Bacteria - 0; Metazoa - 168; Fungi - 0; Plants - 31; Viruses - 0; Other Eukaryotes - 2 (source: NCBI BLink). | chr4:8462720-8464326 REVERSEmoderately similar to…	7.75458e-17	1.63318e-15
GRMZM2G114153	GRMZM2G114153_T01	1.63708	7.96693	21.9803	1.39053	hormone metabolism.abscisic acid.induced-regulated-responsive-activated	weakly similar to ( 159) AT5G23350 | Symbols: | GRAM domain-containing protein / ABA-responsive protein-related | chr5:7858545-7859387 REVERSEmoderately similar to ( 290) loc_os04g44510 12004.m09410 protein FIP1, putative, expressed seq=cds; coord=2:26726276..26727564:1; parent_gene=GRMZM2G114153	4.02037e-11	4.83553e-10
GRMZM2G124276	GRMZM2G124276_T01	1.63665	4.90331	13.5561	14.9967	lipid metabolism.exotics (steroids, squalene etc).sphingolipids	moderately similar to ( 400) AT1G69640 | Symbols: SBH1 | SBH1 (SPHINGOID BASE HYDROXYLASE 1); catalytic/ sphingosine hydroxylase | chr1:26193933-26195466 REVERSEhighly similar to ( 509) loc_os06g12250 12006.m05942 protein protein SUR2, putative, expressed seq=cds; coord=9:4843224..4845584:1; parent_gene=GRMZM2G124276	1.05427e-09	1.0744e-08
GRMZM2G121237	GRMZM2G121237_T01	1.63485	3.7324	10.3054	2.08295	misc.UDP glucosyl and glucoronyl transferases	highly similar to ( 775) AT5G04500 | Symbols: | glycosyltransferase family protein 47 | chr5:1283604-1286155 FORWARDnearly identical (1256) loc_os05g46260 12005.m08751 protein expressed protein seq=cds; coord=6:161715219..161719692:1; parent_gene=GRMZM2G121237	1.64453e-13	2.54881e-12
GRMZM2G349655	GRMZM2G349655_T01	1.63311	5.52433	15.2267	8.33772	signalling.calcium	weakly similar to ( 142) AT4G20780 | Symbols: | calcium-binding protein, putative | chr4:11133309-11133884 REVERSEweakly similar to ( 128) CAST_SOLTU Calcium-binding protein CAST - Solanum tuberosum (Potato)moderately similar to ( 231) loc_os07g48340 12007.m29332 protein calcium-binding protein CAST, putative, expressed seq=cds; coord=7:173327041..173328625:1; parent_gene=GRMZM2G349655	1.41447e-10	1.60798e-09
GRMZM2G095892	GRMZM2G095892_T02	1.63237	6.8881	18.9574	4.0966	signalling.calcium	weakly similar to ( 136) AT4G23060 | Symbols: IQD22 | IQD22 (IQ-domain 22); calmodulin binding | chr4:12087283-12090408 FORWARDhighly similar to ( 547) loc_os04g48160 12004.m09754 protein calmodulin binding protein, putative, expressed seq=cds; coord=10:139735425..139737952:-1; parent_gene=GRMZM2G095892	9.53948e-14	1.51185e-12
GRMZM2G323888	GRMZM2G323888_T01	1.63227	741.369	2042.82	209.606	not assigned.unknown	very weakly similar to (89.0) loc_os05g08420 12005.m27717 protein expressed protein seq=cds; coord=6:128465243..128466087:1; parent_gene=GRMZM2G323888	1.15181e-42	1.13804e-40
GRMZM2G049641	GRMZM2G049641_T01	1.63209	2.11269	5.82171	5.51925	not assigned.unknown	highly similar to ( 602) AT5G57460 | Symbols: | unknown protein | chr5:23275321-23277261 FORWARDnearly identical (1012) loc_os08g14620 12008.m05586 protein expressed protein seq=cds; coord=10:70919582..70921917:-1; parent_gene=GRMZM2G049641	5.1895e-07	3.60118e-06
GRMZM2G445602	GRMZM2G445602_T01	1.63134	85.8444	237.481	297.637	lipid metabolism.FA synthesis and FA elongation.beta ketoacyl CoA synthase	highly similar to ( 714) AT2G26250 | Symbols: FDH, KCS10 | KCS10 (3-KETOACYL-COA SYNTHASE 10); acyltransferase/ catalytic/ transferase, transferring acyl groups other than amino-acyl groups | chr2:11170799-11173059 REVERSEhighly similar to ( 929) loc_os03g08360 12003.m35563 protein fiddlehead-like protein, putative, expressed seq=cds; coord=1:16822675..16826498:1; parent_gene=GRMZM2G445602	2.10813e-39	1.79539e-37
GRMZM2G110960	GRMZM2G110960_T01	1.62987	6.47338	17.821	10.2184	RNA.processing.ribonucleases	moderately similar to ( 398) AT2G32070 | Symbols: | CCR4-NOT transcription complex protein, putative | chr2:13640829-13641656 REVERSEhighly similar to ( 529) loc_os02g55300 12002.m10556 protein CCR4-NOT transcription complex subunit 7, putative, expressed seq=cds; coord=4:173908755..173910205:-1; parent_gene=GRMZM2G110960	4.00377e-11	4.82015e-10
GRMZM2G077316	GRMZM2G077316_T01	1.62873	9.74264	26.7928	56.7915	hormone metabolism.jasmonate.synthesis-degradation.allene oxidase cyclase	moderately similar to ( 236) AT3G25780 | Symbols: AOC3 | AOC3 (ALLENE OXIDE CYCLASE 3); allene-oxide cyclase | chr3:9409362-9410409 FORWARDmoderately similar to ( 349) loc_os03g32314 12003.m08473 protein allene oxide cyclase 4, chloroplast precursor, putative, expressed seq=cds; coord=1:76732179..76733770:-1; parent_gene=GRMZM2G077316	9.96091e-15	1.7352e-13
GRMZM2G152328	GRMZM2G152328_T01	1.62816	13.8471	38.1352	24.7942	cell.organisation	highly similar to ( 747) AT3G12110 | Symbols: ACT11 | ACT11 (actin-11); structural constituent of cytoskeleton | chr3:3858116-3859609 FORWARDhighly similar to ( 758) ACT1_ORYSA Actin-1 - Oryza sativa (Rice)highly similar to ( 758) loc_os03g50890 12003.m10074 protein actin-1, putative, expressed seq=cds; coord=5:10223674..10226373:-1; parent_gene=GRMZM2G152328	3.10189e-21	9.05997e-20
AC233910.1	AC233910.1_FGT008	1.62802	30.6378	84.1563	60.743	not assigned.unknown	weakly similar to ( 102) AT5G19900 | Symbols: | PRLI-interacting factor, putative | chr5:6728561-6730045 REVERSEweakly similar to ( 174) loc_os09g38070 12009.m06754 protein PRLI-interacting factor A, putative, expressed seq=cds; coord=2:197772424..197773800:-1; parent_gene=AC233910.1_FG008	1.02942e-25	4.03694e-24
GRMZM2G359822	GRMZM2G359822_T01	1.62698	2.39626	6.57696	5.53379	amino acid metabolism.synthesis.aromatic aa.chorismate.3-deoxy-D-arabino-heptulosonate 7-phosphate synthase	moderately similar to ( 341) AT4G33510 | Symbols: DHS2 | DHS2 (3-deoxy-d-arabino-heptulosonate 7-phosphate synthase); 3-deoxy-7-phosphoheptulonate synthase | chr4:16116496-16118233 FORWARDmoderately similar to ( 360) AROG_ORYSA Phospho-2-dehydro-3-deoxyheptonate aldolase 2, chloroplast precursor (EC 2.5.1.54) (Phospho-2-keto-3-deoxyheptonate aldolase 2) (DAHP synthetase 2) (3-deoxy-D-arabino-hept…	3.47606e-07	2.48724e-06
GRMZM5G803308	GRMZM5G803308_T01	1.62648	120.754	331.511	44.7362	RNA.regulation of transcription.MYB domain transcription factor family	weakly similar to ( 184) AT5G67300 | Symbols: ATMYBR1, ATMYB44, MYBR1 | MYBR1 (MYB DOMAIN PROTEIN R1); DNA binding / transcription factor | chr5:26854109-26855026 FORWARDweakly similar to ( 120) MYB4_ORYSA Myb-related protein Myb4 (OsMyb4) (Transcription factor RLTR1) - Oryza sativa (Rice)moderately similar to ( 325) loc_os06g43090 12006.m08839 protein MYB transcription factor TaMYB1, putative, e…	2.48217e-38	2.01878e-36
GRMZM2G071630	GRMZM2G071630_T01	1.62643	5.35051	14.6819	4.46616	glycolysis.cytosolic branch.glyceraldehyde 3-phosphate dehydrogenase (GAP-DH)	highly similar to ( 561) AT1G13440 | Symbols: GAPC-2, GAPC2 | GAPC2 (GLYCERALDEHYDE-3-PHOSPHATE DEHYDROGENASE C2); NAD or NADH binding / binding / catalytic/ glyceraldehyde-3-phosphate dehydrogenase (phosphorylating)/ glyceraldehyde-3-phosphate dehydrogenase | chr1:4608465-4610494 REVERSEhighly similar to ( 641) G3PE_MAIZE Glyceraldehyde-3-phosphate dehydrogenase, cytosolic 3 (EC 1.2.1.12) - Zea …	1.01526e-10	1.17207e-09
GRMZM2G073303	GRMZM2G073303_T01	1.62395	12.674	34.6986		not assigned.unknown	very weakly similar to (84.7) loc_os06g41940 12006.m08726 protein TMV response-related gene product, putative, expressed seq=cds; coord=6:98015662..98016892:-1; parent_gene=GRMZM2G073303	1.80016e-15	3.38788e-14
GRMZM2G059706	GRMZM2G059706_T01	1.62169	54.1164	148.256	37.0278	stress.biotic.PR-proteins	weakly similar to ( 138) AT1G65870 | Symbols: | disease resistance-responsive family protein | chr1:24503624-24504193 FORWARDmoderately similar to ( 213) loc_os11g07670 12011.m04963 protein disease resistance response protein 206, putative, expressed seq=cds; coord=4:206497947..206499008:-1; parent_gene=GRMZM2G059706	9.2074e-29	4.52218e-27
GRMZM2G042865	GRMZM2G042865_T01	1.62088	2.4793	6.77947	4.18306	misc.UDP glucosyl and glucoronyl transferases	weakly similar to ( 196) AT3G53150 | Symbols: UGT73D1 | UGT73D1 (UDP-glucosyl transferase 73D1); UDP-glycosyltransferase/ transferase, transferring hexosyl groups | chr3:19697736-19699259 REVERSEweakly similar to ( 136) UFO3_MAIZE Anthocyanidin 3-O-glucosyltransferase (EC 2.4.1.115) (Flavonol 3-O-glucosyltransferase) (UDP-glucose flavonoid 3-O-glucosyltransferase) (Bronze-1) (Bz-W22 allele) - Zea…	3.32189e-07	2.38569e-06
GRMZM2G078723	GRMZM2G078723_T01	1.6207	7.19923	19.6858	10.9319	not assigned.unknown	very weakly similar to (99.4) AT4G32870 | Symbols: | unknown protein | chr4:15862168-15862641 FORWARDweakly similar to ( 191) loc_os05g11250 12005.m05594 protein expressed protein seq=cds; coord=8:93032619..93033591:1; parent_gene=GRMZM2G078723	7.92459e-09	7.27302e-08
GRMZM2G701448	GRMZM2G701448_T01	1.62018	7.96006	21.7662	19.0464	not assigned.unknown	seq=cds; coord=5:32251908..32252877:-1; parent_gene=GRMZM2G701448	3.32189e-07	2.38569e-06
GRMZM2G398423	GRMZM2G398423_T01	1.62015	3.59393	9.8167	4.42483	not assigned.unknown	very weakly similar to (88.2) loc_os03g45930 12003.m09616 protein expressed protein seq=cds; coord=1:258521013..258522651:-1; parent_gene=GRMZM2G398423	7.30299e-08	5.82719e-07
GRMZM2G098714	GRMZM2G098714_T01	1.61929	6.6944	18.2901	22.6601	DNA.synthesis/chromatin structure	highly similar to ( 742) AT5G61000 | Symbols: | replication protein, putative | chr5:24549682-24552641 REVERSEhighly similar to ( 947) loc_os03g11540 12003.m06606 protein replication protein A 70 kDa DNA-binding subunit, putative, expressed seq=cds; coord=1:26326640..26330061:1; parent_gene=GRMZM2G098714	3.81487e-15	6.88746e-14
GRMZM2G159643	GRMZM2G159643_T01	1.61777	93.6384	255.646	17.9248	lipid metabolism.exotics (steroids, squalene etc)	moderately similar to ( 335) AT5G54500 | Symbols: FQR1 | FQR1 (FLAVODOXIN-LIKE QUINONE REDUCTASE 1); FMN binding / oxidoreductase, acting on NADH or NADPH, quinone or similar compound as acceptor | chr5:22124674-22126256 FORWARDmoderately similar to ( 385) loc_os01g57570 12001.m43222 protein minor allergen Alt a 7, putative, expressed seq=cds; coord=8:171852196..171855863:-1; parent_gene=GRMZM2G1…	7.27041e-33	4.38897e-31
GRMZM2G054354	GRMZM2G054354_T02	1.61753	2.41436	6.60188	1.92565	cell.vesicle transport	moderately similar to ( 493) AT5G16880 | Symbols: | VHS domain-containing protein / GAT domain-containing protein | chr5:5549658-5551274 FORWARDhighly similar to ( 645) loc_os02g46962 12002.m100323 protein protein transporter, putative, expressed seq=cds; coord=4:158139416..158143482:1; parent_gene=GRMZM2G054354	3.32189e-07	2.38569e-06
GRMZM2G369742	GRMZM2G369742_T01	1.61704	5.88251	16.0649	4.15902	not assigned.unknown	weakly similar to ( 157) loc_os04g34050 12004.m08499 protein VQ motif family protein, expressed seq=cds; coord=2:55036620..55038324:-1; parent_gene=GRMZM2G369742	2.87967e-11	3.53241e-10
GRMZM2G145840	GRMZM2G145840_T01	1.61576	1.34782	3.6725	1.16377	not assigned.unknown	seq=cds; coord=3:153857529..153861544:1; parent_gene=GRMZM2G145840	3.16632e-07	2.28369e-06
GRMZM2G087326	GRMZM2G087326_T01	1.61375	476.111	1296.79	334.414	cell wall.cell wall proteins.RGP	highly similar to ( 655) AT5G15650 | Symbols: RGP2, ATRGP2 | RGP2 (REVERSIBLY GLYCOSYLATED POLYPEPTIDE 2); transferase, transferring hexosyl groups | chr5:5092203-5094093 FORWARDhighly similar to ( 739) UPTG_MAIZE Alpha-1,4-glucan-protein synthase [UDP-forming] (EC 2.4.1.112) (UDP-glucose:protein transglucosylase) (UPTG) (Amylogenin) (Golgi-associated protein se-wap41) - Zea mays (Maize)highly si…	5.73198e-42	5.53377e-40
GRMZM2G124434	GRMZM2G124434_T01	1.61355	106.992	290.907	107.685	redox.ascorbate and glutathione.ascorbate.GME	highly similar to ( 706) AT5G28840 | Symbols: GME | GME (GDP-D-MANNOSE 3,5-EPIMERASE); GDP-mannose 3,5-epimerase/ NAD or NADH binding / catalytic | chr5:10862472-10864024 REVERSEhighly similar to ( 761) GME1_ORYSA GDP-mannose 3,5-epimerase 1 (EC 5.1.3.18) (GDP-Man 3,5-epimerase 1) (OsGME-1) - Oryza sativa (Rice)highly similar to ( 761) loc_os10g28200 12010.m21888 protein GDP-mannose 3,5-epimerase…	1.10175e-36	8.26937e-35
GRMZM2G167649	GRMZM2G167649_T01	1.61346	15.3478	41.8347	34.2338	not assigned.unknown	seq=cds; coord=1:139790127..139791962:-1; parent_gene=GRMZM2G167649	5.59313e-21	1.61314e-19
GRMZM2G023827	GRMZM2G023827_T01	1.61238	2.76484	7.51147		cell.organisation	moderately similar to ( 388) loc_os06g19110 12006.m06574 protein cadmium tolerance factor, putative, expressed seq=cds; coord=8:168116737..168118521:1; parent_gene=GRMZM2G023827	7.41329e-07	5.00432e-06
GRMZM2G376957	GRMZM2G376957_T01	1.61237	13.8401	37.6347	90.5423	DNA.synthesis/chromatin structure.histone	moderately similar to ( 228) AT5G65360 | Symbols: | histone H3 | chr5:26120099-26120509 REVERSEmoderately similar to ( 226) H32_WHEAT Histone H3.2 - Triticum aestivum (Wheat)moderately similar to ( 228) loc_os11g05730 12011.m04769 protein histone H3, putative, expressed seq=cds; coord=6:76875644..76877633:1; parent_gene=GRMZM2G376957	8.26989e-21	2.36627e-19
GRMZM2G064473	GRMZM2G064473_T01	1.61178	27.8744	75.9717	53.8029	transport.metabolite transporters at the envelope membrane	highly similar to ( 749) AT1G15500 | Symbols: ATNTT2 | ATNTT2; ATP:ADP antiporter | chr1:5326426-5328688 FORWARDhighly similar to ( 753) TLC1_SOLTU Plastidic ATP/ADP-transporter - Solanum tuberosum (Potato)highly similar to ( 887) loc_os01g45910 12001.m10791 protein plastidic ATP/ADP-transporter, putative, expressed seq=cds; coord=3:214471264..214476975:1; parent_gene=GRMZM2G064473	8.01393e-28	3.70575e-26
AC199765.4	AC199765.4_FGT008	1.60921	50.0774	136.174	14.7002	cell wall.cellulose synthesis	highly similar to ( 562) AT5G49720 | Symbols: ATGH9A1, DEC, KOR, RSW2, IRX2, KOR1 | ATGH9A1 (ARABIDOPSIS THALIANA GLYCOSYL HYDROLASE 9A1); cellulase/ hydrolase, hydrolyzing O-glycosyl compounds | chr5:20197765-20200168 REVERSEhighly similar to ( 841) GUN12_ORYSA Endoglucanase 12 (EC 3.2.1.4) (Endo-1,4-beta glucanase 12) (OsGLU3) - Oryza sativa (Rice)highly similar to ( 841) loc_os04g41970 12004.m…	1.17834e-30	6.38222e-29
GRMZM2G414827	GRMZM2G414827_T01	1.60866	65.3133	177.097		not assigned.unknown	seq=cds; coord=1:224766853..224767515:1; parent_gene=GRMZM2G414827	2.18267e-25	8.36491e-24
GRMZM5G832300	GRMZM5G832300_T01	1.6066	2.113	5.72006	19.786	protein.degradation.ubiquitin.E3.RING	weakly similar to ( 196) AT4G01270 | Symbols: | zinc finger (C3HC4-type RING finger) family protein | chr4:532351-534891 FORWARDhighly similar to ( 653) loc_os08g05560 12008.m04699 protein potyviral helper component protease-interacting protein 1, putative, expressed seq=cds; coord=10:82024590..82028535:1; parent_gene=GRMZM5G832300	4.95147e-07	3.45021e-06
GRMZM2G304926	GRMZM2G304926_T01	1.60574	14.3443	38.8919	77.3087	not assigned.unknown	seq=cds; coord=1:161226999..161227786:-1; parent_gene=GRMZM2G304926	2.70111e-12	3.68908e-11
GRMZM2G142919	GRMZM2G142919_T01	1.60569	8.09498	21.9138	20.4108	transport.phosphate	highly similar to ( 570) AT2G38060 | Symbols: PHT4;2 | PHT4;2 (PHOSPHATE TRANSPORTER 4;2); carbohydrate transmembrane transporter/ inorganic phosphate transmembrane transporter/ organic anion transmembrane transporter/ sugar:hydrogen symporter | chr2:15922727-15925623 REVERSEhighly similar to ( 766) loc_os05g37820 12005.m07961 protein sialin, putative, expressed seq=cds; coord=8:97844871..9784936…	6.43007e-16	1.25787e-14
GRMZM2G015703	GRMZM2G015703_T01	1.60327	17.2675	46.7006	47.7627	signalling.calcium	highly similar to ( 830) AT2G41140 | Symbols: CRK1, ATCRK1, ATCBK3 | CRK1 (CDPK-RELATED KINASE 1); calcium ion binding / calcium-dependent protein serine/threonine phosphatase/ calmodulin-dependent protein kinase/ kinase | chr2:17150492-17153378 FORWARDhighly similar to ( 778) CRK_DAUCA CDPK-related protein kinase (EC 2.7.11.1) (PK421) - Daucus carota (Carrot)highly similar to ( 984) loc_os07g447…	7.23475e-28	3.36389e-26
GRMZM2G092604	GRMZM2G092604_T01	1.60219	1.29019	3.48088	9.5779	signalling.receptor kinases.leucine rich repeat XI	nearly identical (1162) AT3G13380 | Symbols: BRL3 | BRL3 (BRI1-LIKE 3); ATP binding / protein binding / protein kinase/ protein serine/threonine kinase | chr3:4347240-4350734 FORWARDmoderately similar to ( 456) PSKR_DAUCA Phytosulfokine receptor precursor (EC 2.7.11.1) (Phytosulfokine LRR receptor kinase) - Daucus carota (Carrot)nearly identical (1795) loc_os09g12240 12009.m04486 protein serine/t…	4.71151e-07	3.29389e-06
GRMZM2G056231	GRMZM2G056231_T01	1.59951	52.367	141.172	325.442	DNA.synthesis/chromatin structure.histone	moderately similar to ( 202) AT3G54560 | Symbols: HTA11 | HTA11; DNA binding | chr3:20196532-20197466 FORWARDmoderately similar to ( 210) H2AV1_ORYSA Probable histone H2A variant 1 - Oryza sativa (Rice)moderately similar to ( 210) loc_os03g06670 12003.m06185 protein histone H2A variant 1, putative, expressed seq=cds; coord=1:12822231..12823464:1; parent_gene=GRMZM2G056231	2.56675e-28	1.24124e-26
GRMZM2G142179	GRMZM2G142179_T01	1.59775	16.758	45.1133	25.9768	RNA.regulation of transcription.AP2/EREBP, APETALA2/Ethylene-responsive element binding protein family	weakly similar to ( 114) AT4G23750 | Symbols: CRF2 | CRF2 (CYTOKININ RESPONSE FACTOR 2); DNA binding / transcription factor | chr4:12376751-12377782 FORWARDweakly similar to ( 101) ERF3_TOBAC Ethylene-responsive transcription factor 3 (Ethylene-responsive element-binding factor 3 homolog) (EREBP-5) (NtERF5) - Nicotiana tabacum (Common tobacco)moderately similar to ( 300) loc_os01g12440 12001.m078…	1.51518e-19	3.95511e-18
GRMZM2G023387	GRMZM2G023387_T01	1.59745	5.8644	15.7717	4.53978	redox.thioredoxin	weakly similar to ( 101) AT1G11530 | Symbols: ATCXXS1 | ATCXXS1 (C-terminal cysteine residue is changed to a serine 1); protein disulfide isomerase | chr1:3874518-3875311 FORWARDweakly similar to ( 191) loc_os04g53740 12004.m35046 protein thioredoxin-like 4, putative, expressed seq=cds; coord=10:143716436..143719458:-1; parent_gene=GRMZM2G023387	4.4723e-07	3.13445e-06
GRMZM2G408963	GRMZM2G408963_T01	1.5971	22.8012	61.4798	48.9463	misc.peroxidases	moderately similar to ( 270) AT5G47000 | Symbols: | peroxidase, putative | chr5:19069171-19070175 REVERSEweakly similar to ( 170) PER2_ARAHY Cationic peroxidase 2 precursor (EC 1.11.1.7) (PNPC2) - Arachis hypogaea (Peanut)moderately similar to ( 428) loc_os04g39100 12004.m08899 protein peroxidase 65 precursor, putative, expressed seq=cds; coord=2:40676283..40677846:1; parent_gene=GRMZM2G408963	6.20785e-23	2.03659e-21
GRMZM5G891282	GRMZM5G891282_T01	1.5961	38.8475	104.424	43.184	OPP.non-reductive PP.ribose 5-phosphate isomerase	moderately similar to ( 250) AT2G01290 | Symbols: | ribose-5-phosphate isomerase | chr2:149192-149989 REVERSEmoderately similar to ( 395) loc_os04g24140 12004.m07548 protein ribose-5-phosphate isomerase, putative, expressed seq=cds; coord=4:187449297..187450591:-1; parent_gene=GRMZM5G891282	1.74136e-26	7.1853e-25
GRMZM2G051782	GRMZM2G051782_T01	1.59587	3.44317	9.26643	21.739	cell.organisation	highly similar to ( 798) AT5G19780 | Symbols: TUA5 | TUA5; structural constituent of cytoskeleton | chr5:6687212-6688926 FORWARDhighly similar to ( 796) TBA6_MAIZE Tubulin alpha-6 chain (Alpha-6 tubulin) - Zea mays (Maize)highly similar to ( 817) loc_os03g11970 12003.m06649 protein tubulin alpha-2 chain, putative, expressed seq=cds; coord=9:146299403..146305484:1; parent_gene=GRMZM2G051782	9.8589e-08	7.70114e-07
GRMZM5G812774	GRMZM5G812774_T01	1.59463	3.95688	10.6356	23.8632	hormone metabolism.brassinosteroid.signal transduction.BZR	moderately similar to ( 223) AT1G78700 | Symbols: | brassinosteroid signalling positive regulator-related | chr1:29599854-29601539 FORWARDmoderately similar to ( 456) loc_os06g35900 12006.m08127 protein brassinazole-resistant 1 protein, putative, expressed seq=cds; coord=9:76462890..76466251:-1; parent_gene=GRMZM5G812774	7.19164e-09	6.64859e-08
GRMZM2G141911	GRMZM2G141911_T01	1.59409	10.9878	29.4756		cell wall.degradation.cellulases and beta -1,4-glucanases	moderately similar to ( 454) AT1G02800 | Symbols: ATCEL2, CEL2 | ATCEL2; cellulase/ hydrolase, hydrolyzing O-glycosyl compounds | chr1:613386-616103 REVERSEhighly similar to ( 596) GUN4_ORYSA Endoglucanase 4 precursor (EC 3.2.1.4) (Endo-1,4-beta glucanase 4) (OsGLU14) - Oryza sativa (Rice)highly similar to ( 596) loc_os02g03120 12002.m05662 protein endoglucanase 1 precursor, putative, expressed s…	7.18593e-18	1.65992e-16
[truncated: 2,525 more rows]
