# Supplementary material for: Transcript profiles of maize embryo sacs and preliminary identification of genes involved in the embryo sac–pollen tube interaction
Source: Front Plant Sci. 2014 Dec 17;5:702. doi: 10.3389/fpls.2014.00702 (PMC4269116; doi:10.3389/fpls.2014.00702)
Supplement: Supplementary file 9 [file DataSheet9.XLS]

## Sheet: Sheet1
			Additional file 9 Transcript factors in DEGs
Transcript ID	RPKM (ES)	RPKM(PES)	logFC(PES/ES)	classification	Description	P-value	FDR
grmzm2g178236_t01	45.9072	16.5953	-1.29531	RNA.transcription	moderately similar to ( 369) AT5G60040 | Symbols: NRPC1 | NRPC1; DNA binding / DNA-directed RNA polymerase/ ribonucleoside binding / zinc ion binding | chr5:24173590-24183269 FORWARDhighly similar to ( 573) loc_os04g41490 12004.m09127 protein DNA-directed RNA polymerase III largest subunit, putative, expressed seq=cds; coord=2:33953219..33958431:-1; parent_gene=GRMZM2G178236	5.99e-13	8.76e-12
grmzm2g102664_t01	16.8183	3.91984	-1.93597	RNA.transcription	moderately similar to ( 410) loc_os02g43750 12002.m09409 protein transcription initiation factor, putative, expressed seq=cds; coord=3:13846717..13865900:-1; parent_gene=GRMZM2G102664	9.73e-14	1.54e-12
grmzm2g064390_t02	7.71417	1.74024	-1.9771	RNA.transcription	weakly similar to ( 159) AT1G03280 | Symbols: | transcription initiation factor IIE (TFIIE) alpha subunit family protein / general transcription factor TFIIE family protein | chr1:803635-806758 FORWARDmoderately similar to ( 219) loc_os08g25460 12008.m06562 protein RNA polymerase II transcription factor/ transcription initiation factor, putative, expressed seq=cds; coord=5:37076106..37082011:1; p…	2.91e-07	2.11e-06
grmzm2g385050_t01	4.8985	1.14997	-1.92179	RNA.transcription	moderately similar to ( 300) AT5G43130 | Symbols: TAF4, TAF4B | TAF4 (TBP-ASSOCIATED FACTOR 4); transcription initiation factor | chr5:17315608-17321144 REVERSEhighly similar to ( 653) loc_os03g32590 12003.m34890 protein transcription initiation factor, putative, expressed seq=cds; coord=1:76881640..76893187:-1; parent_gene=GRMZM2G385050	2.88e-07	2.09e-06
grmzm2g091586_t04	7.9008	0.712938	-3.30117	RNA.transcription	moderately similar to ( 220) AT3G10330 | Symbols: | transcription initiation factor IIB-2 / general transcription factor TFIIB-2 (TFIIB2) | chr3:3199907-3201642 FORWARDmoderately similar to ( 242) TF2B_ORYSA Transcription initiation factor IIB (General transcription factor TFIIB) - Oryza sativa (Rice)moderately similar to ( 242) loc_os09g36440 12009.m06593 protein transcription initiation factor …	6.67e-07	4.54e-06
grmzm2g427031_t01	3.07275	0.588155	-2.21827	RNA.transcription	nearly identical (1406) AT3G23780 | Symbols: NRPD2A, DRD2, NRPD2, DMS2, NRPE2 | NRPD2A; DNA binding / DNA-directed RNA polymerase | chr3:8567971-8573819 REVERSEweakly similar to ( 145) RPOB_CHAGL DNA-directed RNA polymerase beta chain (EC 2.7.7.6) (PEP) (Plastid-encoded RNA polymerase subunit beta) (RNA polymerase subunit beta) - Chaetosphaeridium globosumnearly identical (2018) loc_os04g54840 12…	3.71e-12	4.99e-11
grmzm2g091586_t01	5.98353	0.118018	-5.49573	RNA.transcription	moderately similar to ( 237) AT3G10330 | Symbols: | transcription initiation factor IIB-2 / general transcription factor TFIIB-2 (TFIIB2) | chr3:3199907-3201642 FORWARDmoderately similar to ( 258) TF2B_ORYSA Transcription initiation factor IIB (General transcription factor TFIIB) - Oryza sativa (Rice)moderately similar to ( 258) loc_os09g36440 12009.m06593 protein transcription initiation factor …	2.97e-13	4.5e-12
grmzm5g830932_t01	2.27864	0.0913848	-4.47133	RNA.transcription	weakly similar to ( 195) AT3G53920 | Symbols: SIGC, SIG3 | SIGC (RNA POLYMERASE SIGMA-SUBUNIT C); DNA binding / DNA-directed RNA polymerase/ sigma factor/ transcription factor | chr3:19961041-19963820 REVERSEhighly similar to ( 568) loc_os05g51150 12005.m083832 protein RNA polymerase sigma factor rpoD, putative, expressed seq=cds; coord=6:167820131..167822861:-1; parent_gene=GRMZM5G830932	2.54e-06	1.56e-05
grmzm5g830932_t02	1.91809	0.0795773	-4.42144	RNA.transcription	weakly similar to ( 195) AT3G53920 | Symbols: SIGC, SIG3 | SIGC (RNA POLYMERASE SIGMA-SUBUNIT C); DNA binding / DNA-directed RNA polymerase/ sigma factor/ transcription factor | chr3:19961041-19963820 REVERSEhighly similar to ( 544) loc_os05g51150 12005.m083832 protein RNA polymerase sigma factor rpoD, putative, expressed seq=cds; coord=6:167820131..167823815:-1; parent_gene=GRMZM5G830932	4.59e-06	2.69e-05
grmzm5g872443_t02	1.2996		-31.8085	RNA.transcription	weakly similar to ( 120) loc_os03g32590 12003.m34890 protein transcription initiation factor, putative, expressed seq=cds; coord=4:12018992..12025924:1; parent_gene=GRMZM5G872443	2.54e-06	1.56e-05
GRMZM2G109787_T01	24.3196	61.4707	1.50513	RNA.transcription	weakly similar to ( 133) AT1G14790 | Symbols: RDR1, ATRDRP1 | RDR1 (RNA-DEPENDENT RNA POLYMERASE 1); RNA-directed RNA polymerase/ nucleic acid binding | chr1:5094317-5097817 REVERSE seq=cds; coord=5:205320417..205321195:1; parent_gene=GRMZM2G109787	1.29178e-14	2.23643e-13
GRMZM2G430362_T01	16.3088	34.3638	1.24402	RNA.transcription	highly similar to ( 770) AT5G39840 | Symbols: | ATP-dependent RNA helicase, mitochondrial, putative | chr5:15946769-15949186 FORWARDnearly identical (1055) loc_os04g38630 12004.m08852 protein ATP-dependent RNA helicase SUV3, mitochondrial precursor, putative, expressed seq=cds; coord=2:42114006..42115889:1; parent_gene=GRMZM2G430362	5.31327e-13	7.83181e-12
ac198353.5_fgt004	20.0741	7.29344	-1.28976	RNA.RNA binding	highly similar to ( 595) AT3G13180 | Symbols: | NOL1/NOP2/sun family protein / antitermination NusB domain-containing protein | chr3:4236326-4239966 REVERSEhighly similar to ( 635) loc_os09g30100 12009.m060003 protein ribosomal RNA small subunit methyltransferase B, putative, expressed seq=cds; coord=2:188770909..188785073:1; parent_gene=AC198353.5_FG004	3.31e-08	2.78e-07
grmzm2g127665_t01	46.4913	7.04704	-2.55702	RNA.RNA binding	weakly similar to ( 177) AT5G46250 | Symbols: | RNA recognition motif (RRM)-containing protein | chr5:18755388-18757723 FORWARDmoderately similar to ( 332) loc_os01g55170 12001.m11677 protein RNA binding protein, putative, expressed seq=cds; coord=3:196137228..196147873:1; parent_gene=GRMZM2G127665	1.39e-55	2.2e-53
grmzm2g174919_t01	17.706	3.94838	-1.99475	RNA.RNA binding	moderately similar to ( 291) AT1G71800 | Symbols: | cleavage stimulation factor, putative | chr1:26999606-27001850 FORWARDhighly similar to ( 629) loc_os11g07490 12011.m04945 protein cleavage stimulation factor 64, putative, expressed seq=cds; coord=2:134600873..134610432:-1; parent_gene=GRMZM2G174919	4.09e-16	8.19e-15
grmzm2g123876_t01	9.65909	3.59508	-1.25581	RNA.RNA binding	moderately similar to ( 301) AT3G47120 | Symbols: | RNA recognition motif (RRM)-containing protein | chr3:17351334-17352769 REVERSEmoderately similar to ( 317) loc_os03g61110 12003.m10995 protein RNA-binding motif protein, X-linked 2, putative, expressed seq=cds; coord=1:294883626..294887216:1; parent_gene=GRMZM2G123876	3.09e-06	1.87e-05
grmzm2g171921_t04	12.2333	1.6241	-2.74335	RNA.RNA binding	weakly similar to ( 150) AT5G37720 | Symbols: | RNA and export factor-binding protein, putative | chr5:14981805-14983978 REVERSEmoderately similar to ( 273) loc_os08g33120 12008.m62010 protein THO complex subunit 4, putative, expressed seq=cds; coord=4:80533381..80538602:-1; parent_gene=GRMZM2G171921	8.75e-17	1.83e-15
grmzm2g005374_t01	5.86784	1.38883	-1.9104	RNA.RNA binding	weakly similar to ( 112) loc_os01g65530 12001.m12664 protein RNA recognition motif family protein, expressed seq=cds; coord=8:165555388..165560077:-1; parent_gene=GRMZM2G005374	7.55e-06	4.28e-05
grmzm5g832138_t01	6.67685	1.25519	-2.24385	RNA.RNA binding	weakly similar to ( 122) AT5G25060 | Symbols: | RNA recognition motif (RRM)-containing protein | chr5:8634219-8639984 REVERSEmoderately similar to ( 274) loc_os02g08360 12002.m06182 protein RNA binding protein, putative, expressed seq=cds; coord=5:91359475..91361490:1; parent_gene=GRMZM5G832138	3.95e-07	2.79e-06
grmzm2g077823_t01	3.82395	0.56336	-2.59171	RNA.RNA binding	weakly similar to ( 190) AT5G64200 | Symbols: ATSC35, SC35 | ATSC35; RNA binding / nucleic acid binding / nucleotide binding | chr5:25681849-25683553 REVERSEmoderately similar to ( 208) loc_os07g43050 12007.m079757 protein splicing factor, arginine/serine-rich 2, putative, expressed seq=cds; coord=2:212349126..212354040:1; parent_gene=GRMZM2G077823	1.64e-06	1.04e-05
grmzm2g042343_t01	2.59567	0.455434	-2.34077	RNA.RNA binding	weakly similar to ( 154) AT4G14300 | Symbols: | heterogeneous nuclear ribonucleoprotein, putative / hnRNP, putative | chr4:8231179-8232785 FORWARDmoderately similar to ( 375) loc_os07g03240 12007.m04795 protein ribonucleoprotein like protein, putative, expressed seq=cds; coord=2:236408643..236411957:1; parent_gene=GRMZM2G042343	7.34e-06	4.17e-05
grmzm2g126120_t02	2.03738	0.294153	-2.62598	RNA.RNA binding	moderately similar to ( 464) AT5G15270 | Symbols: | KH domain-containing protein | chr5:4958738-4960947 FORWARDhighly similar to ( 763) loc_os03g25970 12003.m34871 protein nucleic acid binding protein, putative, expressed seq=cds; coord=9:118937736..118942950:-1; parent_gene=GRMZM2G126120	6.24e-07	4.27e-06
grmzm2g025281_t01	2.0599	0.141621	-3.69378	RNA.RNA binding	weakly similar to ( 195) AT5G64200 | Symbols: ATSC35, SC35 | ATSC35; RNA binding / nucleic acid binding / nucleotide binding | chr5:25681849-25683553 REVERSEmoderately similar to ( 211) loc_os07g43050 12007.m079757 protein splicing factor, arginine/serine-rich 2, putative, expressed seq=cds; coord=7:166680013..166686364:1; parent_gene=GRMZM2G025281	1.34e-06	8.65e-06
grmzm2g173777_t03	1.69938	0.0929367	-4.02524	RNA.RNA binding	highly similar to ( 638) AT3G54230 | Symbols: | nucleic acid binding / nucleotide binding / zinc ion binding | chr3:20073872-20080142 FORWARDnearly identical (1287) loc_os02g07070 12002.m33570 protein RNA recognition motif family protein, expressed seq=cds; coord=7:41169067..41176563:1; parent_gene=GRMZM2G173777	1.42e-08	1.26e-07
grmzm2g069102_t04	2.80654	0.0844172	-4.88594	RNA.RNA binding	moderately similar to ( 275) AT4G10610 | Symbols: RBP37, ATRBP37 | CID12; RNA binding | chr4:6557336-6559019 FORWARDmoderately similar to ( 305) loc_os08g02330 12008.m04377 protein CID11, putative, expressed seq=cds; coord=4:38021619..38026810:1; parent_gene=GRMZM2G069102	1.23e-08	1.11e-07
grmzm2g456149_t01	6.46615		-32.2072	RNA.RNA binding	weakly similar to ( 149) AT1G32790 | Symbols: CID11 | RNA-binding protein, putative | chr1:11875028-11877188 REVERSEweakly similar to ( 158) loc_os08g02330 12008.m04377 protein CID11, putative, expressed seq=cds; coord=3:123355308..123358768:1; parent_gene=GRMZM2G456149	4.84e-08	3.97e-07
grmzm2g071589_t03	1.50313		-31.8725	RNA.RNA binding	moderately similar to ( 317) AT5G09880 | Symbols: | RNA recognition motif (RRM)-containing protein | chr5:3081646-3085179 REVERSEmoderately similar to ( 403) loc_os10g30370 12010.m22002 protein RNA-binding region-containing protein 2, putative, expressed seq=cds; coord=5:32658760..32668791:-1; parent_gene=GRMZM2G071589	2.54e-06	1.56e-05
grmzm2g113592_t01	1.20135		-32.1044	RNA.RNA binding	moderately similar to ( 228) AT3G50670 | Symbols: U1-70K, U1SNRNP | U1-70K (U1 SMALL NUCLEAR RIBONUCLEOPROTEIN-70K); RNA binding / nucleotide binding | chr3:18828232-18829492 REVERSEmoderately similar to ( 288) loc_os10g02630 12010.m03680 protein U1 snRNP 70K protein, putative, expressed seq=cds; coord=5:40763414..40768562:-1; parent_gene=GRMZM2G113592	1.8e-07	1.35e-06
grmzm2g076597_t01	1.17405		-31.671	RNA.RNA binding	moderately similar to ( 322) AT5G09880 | Symbols: | RNA recognition motif (RRM)-containing protein | chr5:3081646-3085179 REVERSEmoderately similar to ( 416) loc_os10g30370 12010.m22002 protein RNA-binding region-containing protein 2, putative, expressed seq=cds; coord=1:237741444..237749566:1; parent_gene=GRMZM2G076597	9.62e-06	5.34e-05
GRMZM2G027462_T01	8.56758	17.9923	1.2387	RNA.RNA binding	moderately similar to ( 273) AT2G28380 | Symbols: DRB2 | DRB2 (DSRNA-BINDING PROTEIN 2); double-stranded RNA binding | chr2:12134098-12135915 REVERSEhighly similar to ( 522) loc_os10g33970 12010.m065292 protein double-stranded RNA binding motif family protein, expressed seq=cds; coord=1:230367442..230373137:1; parent_gene=GRMZM2G027462	2.15847e-09	2.12437e-08
GRMZM2G165901_T01	1.39428	7.4726	2.59216	RNA.RNA binding	weakly similar to ( 138) AT2G21660 | Symbols: ATGRP7, CCR2 | CCR2 (COLD, CIRCADIAN RHYTHM, AND RNA BINDING 2); RNA binding / double-stranded DNA binding / single-stranded DNA binding | chr2:9265477-9266316 REVERSEweakly similar to ( 172) GRPA_MAIZE Glycine-rich RNA-binding, abscisic acid-inducible protein - Zea mays (Maize)weakly similar to ( 149) loc_os03g46770 12003.m34905 protein glycine-rich …	4.56768e-09	4.29817e-08
GRMZM2G161315_T01	5.95145	12.9784	1.29347	RNA.regulation of transcription.zf-HD	weakly similar to ( 111) AT3G28920 | Symbols: AtHB34 | AtHB34 (ARABIDOPSIS THALIANA HOMEOBOX PROTEIN 34); DNA binding / transcription factor | chr3:10940598-10941536 REVERSEmoderately similar to ( 258) loc_os09g24820 12009.m05636 protein ZF-HD homeobox protein, putative, expressed seq=cds; coord=7:112875599..112877310:1; parent_gene=GRMZM2G161315	2.57557e-07	1.88067e-06
GRMZM2G425236_T01	1.05869	6.20961	2.7227	RNA.regulation of transcription.zf-HD	weakly similar to ( 122) AT4G24660 | Symbols: ATHB22, MEE68 | ATHB22 (HOMEOBOX PROTEIN 22); DNA binding / transcription factor | chr4:12724851-12725513 REVERSEmoderately similar to ( 233) loc_os03g50920 12003.m10076 protein ZF-HD protein dimerisation region containing protein, expressed seq=cds; coord=5:10212825..10214027:-1; parent_gene=GRMZM2G425236	9.02212e-08	7.07834e-07
grmzm2g027972_t01	33.2941	12.2447	-1.2767	RNA.regulation of transcription.WRKY domain transcription factor family	moderately similar to ( 351) AT5G56270 | Symbols: WRKY2, ATWRKY2 | WRKY2; transcription factor | chr5:22780816-22783137 FORWARDhighly similar to ( 608) loc_os08g38990 12008.m26522 protein OsWRKY30 - Superfamily of rice TFs having WRKY and zinc finger domains, expressed seq=cds; coord=4:198130795..198133409:-1; parent_gene=GRMZM2G027972	5.47e-13	8.03e-12
ac209050.3_fgt003	25.5086	8.0837	-1.487	RNA.regulation of transcription.WRKY domain transcription factor family	weakly similar to ( 154) AT4G31800 | Symbols: WRKY18 | WRKY18; transcription factor | chr4:15383296-15384812 FORWARDmoderately similar to ( 292) loc_os06g44010 12006.m08929 protein OsWRKY28 - Superfamily of rice TFs having WRKY and zinc finger domains, expressed seq=cds; coord=6:96329344..96330904:1; parent_gene=AC209050.3_FG003	1.23e-10	1.4e-09
GRMZM2G324999_T01	20.0332	119.117	2.74045	RNA.regulation of transcription.WRKY domain transcription factor family	weakly similar to ( 115) AT4G11070 | Symbols: WRKY41, AtWRKY41 | WRKY41; transcription factor | chr4:6759303-6760763 FORWARDweakly similar to ( 193) loc_os08g29660 12008.m06969 protein OsWRKY69 - Superfamily of rice TFs having WRKY and zinc finger domains, expressed seq=cds; coord=1:216580897..216582541:1; parent_gene=GRMZM2G324999	9.44695e-70	2.54203e-67
GRMZM2G090594_T01	15.6055	62.5352	2.17513	RNA.regulation of transcription.WRKY domain transcription factor family	weakly similar to ( 137) AT2G24570 | Symbols: WRKY17, ATWRKY17 | WRKY17; calmodulin binding / transcription factor | chr2:10437676-10439222 REVERSEweakly similar to ( 193) loc_os08g13840 12008.m26630 protein OsWRKY25 - Superfamily of rice TFs having WRKY and zinc finger domains, expressed seq=cds; coord=10:68725531..68726795:1; parent_gene=GRMZM2G090594	1.61792e-33	1.01046e-31
GRMZM2G004060_T01	14.2777	158.736	3.6454	RNA.regulation of transcription.WRKY domain transcription factor family	weakly similar to ( 147) loc_os05g25770 12005.m06869 protein OsWRKY45 - Superfamily of rice TFs having WRKY and zinc finger domains, expressed seq=cds; coord=10:12103219..12104937:1; parent_gene=GRMZM2G004060	4.83496e-109	3.70592e-106
GRMZM2G148561_T01	11.9041	63.2704	2.58036	RNA.regulation of transcription.WRKY domain transcription factor family	weakly similar to ( 108) AT2G23320 | Symbols: WRKY15 | WRKY15; calmodulin binding / transcription factor | chr2:9924998-9925991 FORWARDweakly similar to ( 169) loc_os08g13840 12008.m26630 protein OsWRKY25 - Superfamily of rice TFs having WRKY and zinc finger domains, expressed seq=cds; coord=4:69920108..69921324:-1; parent_gene=GRMZM2G148561	1.15578e-41	1.09903e-39
GRMZM2G148087_T01	11.6851	33.8267	1.70413	RNA.regulation of transcription.WRKY domain transcription factor family	moderately similar to ( 318) AT2G38470 | Symbols: WRKY33, ATWRKY33 | WRKY33; transcription factor | chr2:16108476-16110539 FORWARDhighly similar to ( 617) loc_os01g61080 12001.m12235 protein OsWRKY24 - Superfamily of rice TFs having WRKY and zinc finger domains, expressed seq=cds; coord=3:183888339..183891343:-1; parent_gene=GRMZM2G148087	1.02305e-22	3.31756e-21
GRMZM2G169966_T01	11.3826	50.0284	2.30888	RNA.regulation of transcription.WRKY domain transcription factor family	moderately similar to ( 294) AT2G38470 | Symbols: WRKY33, ATWRKY33 | WRKY33; transcription factor | chr2:16108476-16110539 FORWARDmoderately similar to ( 406) loc_os05g39720 12005.m08150 protein OsWRKY70 - Superfamily of rice TFs having WRKY and zinc finger domains, expressed seq=cds; coord=6:153264614..153267678:-1; parent_gene=GRMZM2G169966	1.85687e-41	1.74601e-39
GRMZM2G073272_T01	11.1962	66.9845	2.74822	RNA.regulation of transcription.WRKY domain transcription factor family	weakly similar to ( 156) AT4G31550 | Symbols: WRKY11, ATWRKY11 | WRKY11; calmodulin binding / transcription factor | chr4:15290065-15291458 REVERSEweakly similar to ( 184) loc_os04g21950 12004.m07345 protein OsWRKY51 - Superfamily of rice TFs having WRKY and zinc finger domains, expressed seq=cds; coord=5:159232314..159233530:1; parent_gene=GRMZM2G073272	1.97606e-42	1.92982e-40
GRMZM2G151763_T01	9.02736	17.3101	1.10887	RNA.regulation of transcription.WRKY domain transcription factor family	weakly similar to ( 162) AT4G18170 | Symbols: WRKY28, ATWRKY28 | WRKY28; transcription factor | chr4:10061508-10062691 FORWARDmoderately similar to ( 226) loc_os01g47560 12001.m10951 protein OsWRKY16 - Superfamily of rice TFs having WRKY and zinc finger domains, expressed seq=cds; coord=3:210977929..210981079:1; parent_gene=GRMZM2G151763	6.01296e-07	4.12844e-06
GRMZM2G083350_T01	7.07031	62.7961	3.32112	RNA.regulation of transcription.WRKY domain transcription factor family	moderately similar to ( 208) AT5G15130 | Symbols: WRKY72, ATWRKY72 | WRKY72; transcription factor | chr5:4904426-4906879 FORWARDmoderately similar to ( 367) loc_os01g09080 12001.m07532 protein WRKY transcription factor 61, putative, expressed seq=cds; coord=8:19851097..19853367:-1; parent_gene=GRMZM2G083350	5.59304e-74	1.79076e-71
GRMZM2G059562_T01	6.61416	58.6657	3.31744	RNA.regulation of transcription.WRKY domain transcription factor family	weakly similar to ( 148) loc_os01g60640 12001.m12192 protein OsWRKY21 - Superfamily of rice TFs having WRKY and zinc finger domains, expressed seq=cds; coord=3:184816891..184818185:-1; parent_gene=GRMZM2G059562	2.47565e-48	3.16258e-46
GRMZM5G812272_T02	6.42738	24.5079	2.09886	RNA.regulation of transcription.WRKY domain transcription factor family	weakly similar to ( 163) AT4G18170 | Symbols: WRKY28, ATWRKY28 | WRKY28; transcription factor | chr4:10061508-10062691 FORWARDmoderately similar to ( 233) loc_os01g47560 12001.m10951 protein OsWRKY16 - Superfamily of rice TFs having WRKY and zinc finger domains, expressed seq=cds; coord=8:149077318..149080011:-1; parent_gene=GRMZM5G812272	5.91696e-21	1.7046e-19
GRMZM2G158328_T01	4.10777	81.1253	4.47043	RNA.regulation of transcription.WRKY domain transcription factor family	weakly similar to ( 166) loc_os01g60600 12001.m12188 protein WRKY DNA binding domain containing protein, expressed seq=cds; coord=3:184849632..184852523:1; parent_gene=GRMZM2G158328	1.1292e-101	7.32362e-99
GRMZM2G125653_T01	3.78576	16.3015	2.27549	RNA.regulation of transcription.WRKY domain transcription factor family	weakly similar to ( 172) AT1G80840 | Symbols: WRKY40, ATWRKY40 | WRKY40; transcription factor | chr1:30383834-30385356 FORWARDmoderately similar to ( 333) loc_os09g25060 12009.m05659 protein OsWRKY76 - Superfamily of rice TFs having WRKY and zinc finger domains, expressed seq=cds; coord=7:115308636..115310466:-1; parent_gene=GRMZM2G125653	2.99246e-17	6.51388e-16
GRMZM5G863420_T01	3.46391	16.8371	2.44978	RNA.regulation of transcription.WRKY domain transcription factor family	weakly similar to ( 134) AT5G64810 | Symbols: WRKY51, ATWRKY51 | WRKY51; transcription factor | chr5:25908415-25909687 FORWARDmoderately similar to ( 219) loc_os05g46020 12005.m08727 protein OsWRKY7 - Superfamily of rice TFs having WRKY and zinc finger domains, expressed seq=cds; coord=6:161477481..161478917:1; parent_gene=GRMZM5G863420	3.46567e-15	6.29294e-14
AC165171.2_FGT002	3.29707	34.3794	3.55117	RNA.regulation of transcription.WRKY domain transcription factor family	weakly similar to ( 148) AT5G43290 | Symbols: WRKY49, ATWRKY49 | WRKY49; transcription factor | chr5:17371987-17373083 REVERSEmoderately similar to ( 243) loc_os01g74140 12001.m13441 protein OsWRKY17 - Superfamily of rice TFs having WRKY and zinc finger domains, expressed seq=cds; coord=3:144743920..144745323:1; parent_gene=AC165171.2_FG002	1.87343e-35	1.32735e-33
GRMZM2G453571_T01	3.2227	9.69345	1.75836	RNA.regulation of transcription.WRKY domain transcription factor family	weakly similar to ( 156) AT1G29860 | Symbols: WRKY71, ATWRKY71 | WRKY71; transcription factor | chr1:10454482-10455652 FORWARDmoderately similar to ( 218) loc_os05g49100 12005.m08980 protein OsWRKY49 - Superfamily of rice TFs having WRKY and zinc finger domains, expressed seq=cds; coord=6:164799868..164802835:1; parent_gene=GRMZM2G453571	4.13779e-08	3.42142e-07
GRMZM2G468056_T01	2.85071	41.4217	4.02997	RNA.regulation of transcription.WRKY domain transcription factor family	very weakly similar to (91.3) loc_os01g60640 12001.m12192 protein OsWRKY21 - Superfamily of rice TFs having WRKY and zinc finger domains, expressed seq=cds; coord=8:170335807..170336865:-1; parent_gene=GRMZM2G468056	6.30009e-35	4.30688e-33
GRMZM2G516301_T01	1.38436	18.8767	3.93736	RNA.regulation of transcription.WRKY domain transcription factor family	weakly similar to ( 126) AT5G26170 | Symbols: WRKY50, ATWRKY50 | WRKY50; transcription factor | chr5:9147176-9148128 REVERSEweakly similar to ( 149) loc_os01g09100 12001.m07534 protein OsWRKY10 - Superfamily of rice TFs having WRKY and zinc finger domains, expressed seq=cds; coord=8:19834281..19835285:1; parent_gene=GRMZM2G516301	9.5643e-17	1.99768e-15
GRMZM2G139815_T01	0.988827	7.5348	3.09998	RNA.regulation of transcription.WRKY domain transcription factor family	very weakly similar to (94.0) AT4G23810 | Symbols: WRKY53, ATWRKY53 | WRKY53; DNA binding / protein binding / transcription activator/ transcription factor | chr4:12392666-12393739 REVERSEweakly similar to ( 200) loc_os09g16510 12009.m04911 protein OsWRKY74 - Superfamily of rice TFs having WRKY and zinc finger domains, expressed seq=cds; coord=7:92391794..92393825:1; parent_gene=GRMZM2G139815	2.50814e-12	3.4348e-11
GRMZM2G003551_T01	0.657313	11.0718	4.24289	RNA.regulation of transcription.WRKY domain transcription factor family	weakly similar to ( 130) AT4G23810 | Symbols: WRKY53, ATWRKY53 | WRKY53; DNA binding / protein binding / transcription activator/ transcription factor | chr4:12392666-12393739 REVERSEmoderately similar to ( 243) loc_os06g06360 12006.m05362 protein WRKY transcription factor 30, putative, expressed seq=cds; coord=9:18101309..18104762:1; parent_gene=GRMZM2G003551	3.42269e-18	8.12135e-17
GRMZM2G461648_T01		7.15092	33.1771	RNA.regulation of transcription.WRKY domain transcription factor family	weakly similar to ( 132) loc_os11g02470 12011.m04446 protein WRKY transcription factor 38, putative seq=cds; coord=4:184676411..184677679:-1; parent_gene=GRMZM2G461648	6.81384e-14	1.09777e-12
grmzm2g144464_t01	4425.53	1277.69	-1.6212	RNA.regulation of transcription.unclassified	weakly similar to ( 193) AT2G35615 | Symbols: | aspartyl protease family protein | chr2:14959391-14960734 FORWARDmoderately similar to ( 400) loc_os01g08330 12001.m07458 protein aspartic proteinase nepenthesin-1 precursor, putative seq=cds; coord=8:18349511..18350973:1; parent_gene=GRMZM2G144464	2.75e-43	2.83e-41
grmzm2g351582_t01	64.7894	23.1204	-1.31583	RNA.regulation of transcription.unclassified	highly similar to ( 633) AT5G37340 | Symbols: | zinc finger (ZPR1-type) family protein | chr5:14787488-14792373 REVERSEhighly similar to ( 824) loc_os08g36774 12008.m07665 protein protein binding protein, putative, expressed seq=cds; coord=1:279112446..279118927:-1; parent_gene=GRMZM2G351582	5.61e-18	1.31e-16
grmzm2g178910_t01	54.6023	21.0416	-1.20701	RNA.regulation of transcription.unclassified	moderately similar to ( 216) AT1G45207 | Symbols: | remorin family protein | chr1:17130703-17133548 REVERSEhighly similar to ( 686) loc_os02g52810 12002.m33459 protein remorin, C-terminal region family protein, expressed seq=cds; coord=5:210053504..210057962:-1; parent_gene=GRMZM2G178910	1.68e-15	3.17e-14
grmzm2g091044_t01	52.9509	19.6991	-1.25652	RNA.regulation of transcription.unclassified	moderately similar to ( 206) AT1G32700 | Symbols: | zinc-binding family protein | chr1:11827986-11829444 FORWARDmoderately similar to ( 272) loc_os02g46610 12002.m09698 protein expressed protein seq=cds; coord=4:157504272..157506067:-1; parent_gene=GRMZM2G091044	9.08e-13	1.3e-11
grmzm2g106881_t01	30.9808	12.0913	-1.19276	RNA.regulation of transcription.unclassified	moderately similar to ( 442) AT1G01930 | Symbols: | zinc finger protein-related | chr1:320041-322809 REVERSEhighly similar to ( 824) loc_os04g48520 12004.m09788 protein expressed protein seq=cds; coord=2:16125764..16131844:-1; parent_gene=GRMZM2G106881	1.12e-11	1.43e-10
grmzm2g131280_t01	28.8505	7.10265	-1.85497	RNA.regulation of transcription.unclassified	moderately similar to ( 251) AT1G32700 | Symbols: | zinc-binding family protein | chr1:11827986-11829444 FORWARDmoderately similar to ( 338) loc_os04g50120 12004.m09944 protein expressed protein seq=cds; coord=2:13545639..13547834:1; parent_gene=GRMZM2G131280	1.02e-17	2.32e-16
grmzm2g126956_t01	17.8802	6.66078	-1.25395	RNA.regulation of transcription.unclassified	highly similar to ( 609) AT5G58760 | Symbols: DDB2 | DDB2 (damaged DNA-binding 2); nucleic acid binding / nucleotide binding / zinc ion binding | chr5:23730741-23733606 REVERSEhighly similar to ( 813) loc_os01g04870 12001.m07121 protein nucleic acid binding protein, putative, expressed seq=cds; coord=8:13615942..13620752:-1; parent_gene=GRMZM2G126956	7.82e-09	7.18e-08
grmzm2g040078_t01	10.2964	4.37812	-1.06593	RNA.regulation of transcription.unclassified	moderately similar to ( 333) AT3G21480 | Symbols: | FUNCTIONS IN: molecular_function unknown; INVOLVED IN: biological_process unknown; LOCATED IN: intracellular; CONTAINS InterPro DOMAIN/s: BRCT (InterPro:IPR001357); BEST Arabidopsis thaliana protein match is: transcription coactivator (TAIR:AT4G03130.1); Has 489 Blast hits to 455 proteins in 115 species: Archae - 2; Bacteria - 37; Metazoa - 270;…	3.01e-07	2.18e-06
grmzm2g142150_t01	13.7074	3.76785	-1.6952	RNA.regulation of transcription.unclassified	moderately similar to ( 438) AT1G78930 | Symbols: | mitochondrial transcription termination factor-related / mTERF-related | chr1:29678285-29680648 REVERSEhighly similar to ( 703) loc_os09g38720 12009.m06813 protein mTERF family protein, expressed seq=cds; coord=7:145303872..145308595:-1; parent_gene=GRMZM2G142150	2.2e-14	3.72e-13
grmzm2g114688_t01	8.45028	2.93277	-1.35717	RNA.regulation of transcription.unclassified	weakly similar to ( 127) AT2G05160 | Symbols: | zinc finger (CCCH-type) family protein / RNA recognition motif (RRM)-containing protein | chr2:1859011-1860931 REVERSEweakly similar to ( 158) loc_os07g39440 12007.m08186 protein RNA binding protein, putative seq=cds; coord=7:161254250..161259681:-1; parent_gene=GRMZM2G114688	2.21e-07	1.63e-06
grmzm2g009438_t01	35.3591	2.36345	-3.73799	RNA.regulation of transcription.unclassified	weakly similar to ( 189) AT2G39830 | Symbols: DAR2 | DAR2 (DA1-RELATED PROTEIN 2); zinc ion binding | chr2:16619950-16623658 REVERSEmoderately similar to ( 236) loc_os03g16090 12003.m101288 protein zinc ion binding protein, putative, expressed seq=cds; coord=4:192646789..192651389:1; parent_gene=GRMZM2G009438	1.39e-48	1.82e-46
grmzm2g173425_t03	15.0841	1.9679	-2.76964	RNA.regulation of transcription.unclassified	weakly similar to ( 119) AT1G32540 | Symbols: LOL1 | LOL1 (LSD ONE LIKE 1); DNA binding | chr1:11768043-11769591 FORWARDweakly similar to ( 135) loc_os03g43840 12003.m09425 protein zinc finger protein LSD2, putative, expressed seq=cds; coord=1:252258466..252261490:-1; parent_gene=GRMZM2G173425	1.02e-10	1.18e-09
grmzm2g019971_t01	8.1024	1.71255	-2.07345	RNA.regulation of transcription.unclassified	moderately similar to ( 397) AT1G53490 | Symbols: | DNA binding | chr1:19965146-19966811 FORWARDhighly similar to ( 508) loc_os02g13810 12002.m33977 protein DNA binding protein, putative, expressed seq=cds; coord=5:150088686..150095175:1; parent_gene=GRMZM2G019971	4.35e-07	3.05e-06
grmzm2g143210_t01	11.8213	0.531693	-4.30561	RNA.regulation of transcription.unclassified	weakly similar to ( 135) AT1G53490 | Symbols: | DNA binding | chr1:19965146-19966811 FORWARDweakly similar to ( 153) loc_os02g13810 12002.m33977 protein DNA binding protein, putative, expressed seq=cds; coord=1:90839054..90843237:1; parent_gene=GRMZM2G143210	2.1e-19	5.41e-18
grmzm2g376959_t01	9.23693	0.261492	-4.97403	RNA.regulation of transcription.unclassified	highly similar to ( 501) AT5G25150 | Symbols: TAF5 | TAF5 (TBP-ASSOCIATED FACTOR 5); nucleotide binding / transcription regulator | chr5:8677117-8682058 FORWARDvery weakly similar to (92.4) PF20_CHLRE Flagellar WD repeat protein PF20 - Chlamydomonas reinhardtiihighly similar to ( 580) loc_os06g44030 12006.m08931 protein transcription initiation factor TFIID subunit 5, putative, expressed seq=cds;…	1.66e-16	3.4e-15
grmzm2g043030_t02	3.14095	0.215944	-3.69249	RNA.regulation of transcription.unclassified	moderately similar to ( 485) loc_os03g16790 12003.m35160 protein DHHC zinc finger domain containing protein, expressed seq=cds; coord=1:40644594..40649751:1; parent_gene=GRMZM2G043030	1.34e-06	8.65e-06
grmzm2g039889_t04	2.36225	0.17225	-3.60889	RNA.regulation of transcription.unclassified	weakly similar to ( 163) AT3G12680 | Symbols: HUA1 | HUA1 (ENHANCER OF AG-4 1); RNA binding | chr3:4025276-4028999 REVERSEweakly similar to ( 122) ZFNL3_ORYSA Zinc finger CCCH domain-containing protein ZFN-like 3 - Oryza sativa (Rice)weakly similar to ( 197) loc_os01g42970 12001.m42678 protein zinc finger C-x8-C-x5-C-x3-H type family protein, expressed seq=cds; coord=8:143696861..143704734:-1; pa…	4.15e-06	2.46e-05
grmzm2g141503_t01	7.3544	0.130124	-5.65152	RNA.regulation of transcription.unclassified	moderately similar to ( 292) AT3G51390 | Symbols: | zinc finger (DHHC type) family protein | chr3:19075718-19077966 FORWARDmoderately similar to ( 484) loc_os12g29560 12012.m06770 protein metal ion binding protein, putative, expressed seq=cds; coord=5:193912373..193917165:1; parent_gene=GRMZM2G141503	8.88e-15	1.55e-13
grmzm5g868981_t04	1.17965		-31.8714	RNA.regulation of transcription.unclassified	weakly similar to ( 151) loc_os08g41010 12008.m26752 protein Zn-finger, RanBP-type, containing protein, expressed seq=cds; coord=4:31994514..31999008:1; parent_gene=GRMZM5G868981	2.54e-06	1.56e-05
GRMZM2G042008_T01	95.9238	223.353	1.39215	RNA.regulation of transcription.unclassified	moderately similar to ( 398) AT1G01300 | Symbols: | aspartyl protease family protein | chr1:117065-118522 FORWARDhighly similar to ( 585) loc_os01g41550 12001.m10423 protein aspartic proteinase nepenthesin-2 precursor, putative, expressed seq=cds; coord=3:223089120..223091094:-1; parent_gene=GRMZM2G042008	1.03267e-28	5.04255e-27
GRMZM2G153523_T01	91.9911	177.033	1.1145	RNA.regulation of transcription.unclassified	moderately similar to ( 407) AT3G59080 | Symbols: | aspartyl protease family protein | chr3:21836812-21838419 FORWARDhighly similar to ( 664) loc_os02g21040 12002.m07344 protein aspartic proteinase nepenthesin-2 precursor, putative, expressed seq=cds; coord=2:198393740..198395904:1; parent_gene=GRMZM2G153523	6.09488e-19	1.53244e-17
GRMZM2G065566_T01	75.0363	177.484	1.41105	RNA.regulation of transcription.unclassified	highly similar to ( 523) AT5G58430 | Symbols: ATEXO70B1 | ATEXO70B1 (exocyst subunit EXO70 family protein B1); protein binding | chr5:23621460-23623334 REVERSEhighly similar to ( 998) loc_os05g39610 12005.m083752 protein protein binding protein, putative, expressed seq=cds; coord=8:118678684..118681299:-1; parent_gene=GRMZM2G065566	1.36286e-29	6.97816e-28
GRMZM2G136884_T01	36.3077	72.5526	1.1684	RNA.regulation of transcription.unclassified	moderately similar to ( 412) AT3G59080 | Symbols: | aspartyl protease family protein | chr3:21836812-21838419 FORWARDhighly similar to ( 648) loc_os02g21040 12002.m07344 protein aspartic proteinase nepenthesin-2 precursor, putative, expressed seq=cds; coord=7:164078510..164080526:1; parent_gene=GRMZM2G136884	2.68022e-16	5.44527e-15
GRMZM2G468657_T01	23.3773	122.971	2.56796	RNA.regulation of transcription.unclassified	moderately similar to ( 241) AT2G03200 | Symbols: | aspartyl protease family protein | chr2:966506-967891 REVERSEmoderately similar to ( 481) loc_os07g34940 12007.m07750 protein aspartic proteinase nepenthesin-1 precursor, putative, expressed seq=cds; coord=7:154506943..154508699:-1; parent_gene=GRMZM2G468657	8.07308e-66	1.90842e-63
GRMZM2G003424_T02	9.91405	19.6258	1.15308	RNA.regulation of transcription.unclassified	moderately similar to ( 223) AT3G51950 | Symbols: | zinc finger (CCCH-type) family protein / RNA recognition motif (RRM)-containing protein | chr3:19278244-19280407 REVERSEhighly similar to ( 750) loc_os03g21140 12003.m07521 protein RNA binding protein, putative, expressed seq=cds; coord=1:54125016..54128557:1; parent_gene=GRMZM2G003424	1.34009e-10	1.52754e-09
GRMZM2G090715_T01	6.99156	16.548	1.41037	RNA.regulation of transcription.unclassified	highly similar to ( 524) AT5G43100 | Symbols: | aspartyl protease family protein | chr5:17299264-17302718 FORWARDvery weakly similar to (99.4) ASP1_ORYSA Aspartic proteinase Asp1 precursor (EC 3.4.23.-) (OsAsp1) (OSAP1) (Nucellin-like protein) - Oryza sativa (Rice)highly similar to ( 662) loc_os07g40260 12007.m29392 protein pepsin A, putative, expressed seq=cds; coord=7:162417514..162430709:-1; p…	1.94174e-08	1.69126e-07
GRMZM2G145008_T01	3.79203	9.74338	1.53073	RNA.regulation of transcription.unclassified	moderately similar to ( 311) AT1G08680 | Symbols: ZIGA4 | ZIGA4 (ARF GAP-like zinc finger-containing protein ZiGA4); ARF GTPase activator/ DNA binding / zinc ion binding | chr1:2762820-2768387 FORWARDhighly similar to ( 748) loc_os03g20720 12003.m07479 protein ZIGA4, putative, expressed seq=cds; coord=1:52764295..52769331:-1; parent_gene=GRMZM2G145008	8.36757e-10	8.64227e-09
GRMZM2G112205_T01	3.28008	17.0542	2.54601	RNA.regulation of transcription.unclassified	moderately similar to ( 305) AT1G01300 | Symbols: | aspartyl protease family protein | chr1:117065-118522 FORWARDhighly similar to ( 529) loc_os01g52190 12001.m11393 protein aspartic proteinase nepenthesin-1 precursor, putative seq=cds; coord=3:202113571..202114929:-1; parent_gene=GRMZM2G112205	9.6489e-18	2.19281e-16
GRMZM2G026911_T01	2.17954	10.3752	2.41969	RNA.regulation of transcription.unclassified	moderately similar to ( 379) AT5G02190 | Symbols: ATASP38, PCS1 | PCS1 (PROMOTION OF CELL SURVIVAL 1); aspartic-type endopeptidase/ peptidase | chr5:435322-436683 FORWARDhighly similar to ( 556) loc_os03g16500 12003.m35155 protein PCS1, putative, expressed seq=cds; coord=1:39756846..39758525:1; parent_gene=GRMZM2G026911	1.97124e-13	3.03657e-12
GRMZM2G077212_T01	1.9377	10.4444	2.60061	RNA.regulation of transcription.unclassified	moderately similar to ( 465) AT5G26600 | Symbols: | catalytic/ pyridoxal phosphate binding | chr5:9377455-9378882 FORWARDhighly similar to ( 626) loc_os01g18640 12001.m42973 protein isopenicillin N epimerase, putative, expressed seq=cds; coord=8:560969..563022:-1; parent_gene=GRMZM2G077212	2.05656e-17	4.55106e-16
GRMZM2G025491_T01	1.76374	6.58951	2.07017	RNA.regulation of transcription.unclassified	moderately similar to ( 215) AT2G03200 | Symbols: | aspartyl protease family protein | chr2:966506-967891 REVERSEmoderately similar to ( 466) loc_os06g10670 12006.m05785 protein aspartic proteinase nepenthesin-1 precursor, putative, expressed seq=cds; coord=6:109385420..109387134:1; parent_gene=GRMZM2G025491	5.12925e-08	4.18649e-07
GRMZM2G143599_T01	1.39855	7.8524	2.65744	RNA.regulation of transcription.unclassified	moderately similar to ( 391) AT5G45550 | Symbols: | mob1/phocein family protein | chr5:18462284-18464840 FORWARDmoderately similar to ( 439) loc_os10g25674 12010.m21996 protein mps one binder kinase activator-like 1A, putative, expressed seq=cds; coord=5:36283629..36286496:1; parent_gene=GRMZM2G143599	3.13799e-10	3.40946e-09
GRMZM2G017429_T01	1.05993	8.92675	3.24316	RNA.regulation of transcription.unclassified	weakly similar to ( 144) AT5G07900 | Symbols: | mitochondrial transcription termination factor family protein / mTERF family protein | chr5:2520188-2521405 FORWARDhighly similar to ( 549) loc_os02g51450 12002.m33454 protein mTERF family protein, expressed seq=cds; coord=5:207899002..207900503:1; parent_gene=GRMZM2G017429	8.61806e-15	1.51169e-13
GRMZM2G175927_T01	0.697814	13.5531	4.44865	RNA.regulation of transcription.unclassified	moderately similar to ( 243) AT2G03200 | Symbols: | aspartyl protease family protein | chr2:966506-967891 REVERSEmoderately similar to ( 464) loc_os07g34940 12007.m07750 protein aspartic proteinase nepenthesin-1 precursor, putative, expressed seq=cds; coord=2:203944178..203945774:-1; parent_gene=GRMZM2G175927	1.507e-28	7.33041e-27
GRMZM2G018108_T01		4.62517	33.3089	RNA.regulation of transcription.unclassified	moderately similar to ( 349) AT5G10770 | Symbols: | chloroplast nucleoid DNA-binding protein, putative | chr5:3403331-3405331 REVERSEvery weakly similar to (89.7) ASP1_ORYSA Aspartic proteinase Asp1 precursor (EC 3.4.23.-) (OsAsp1) (OSAP1) (Nucellin-like protein) - Oryza sativa (Rice)highly similar to ( 509) loc_os09g30414 12009.m06195 protein aspartic proteinase nepenthesin-2 precursor, putative…	5.58366e-15	9.9111e-14
GRMZM2G481163_T01	154.201	291.645	1.08825	RNA.regulation of transcription.Trihelix, Triple-Helix transcription factor family	weakly similar to ( 105) AT2G44730 | Symbols: | transcription factor | chr2:18437447-18438565 REVERSEmoderately similar to ( 317) loc_os10g41460 12010.m06910 protein expressed protein seq=cds; coord=1:94880053..94881644:1; parent_gene=GRMZM2G481163	1.26635e-18	3.10982e-17
GRMZM2G305362_T01	48.882	110.978	1.35371	RNA.regulation of transcription.Trihelix, Triple-Helix transcription factor family	weakly similar to ( 168) AT3G10040 | Symbols: | transcription factor | chr3:3096580-3097875 REVERSEmoderately similar to ( 213) loc_os01g21590 12001.m08643 protein expressed protein seq=cds; coord=8:39016489..39018390:-1; parent_gene=GRMZM2G305362	3.22114e-23	1.07346e-21
GRMZM2G163157_T01	29.2956	55.4431	1.08743	RNA.regulation of transcription.Trihelix, Triple-Helix transcription factor family	weakly similar to ( 119) AT5G05550 | Symbols: | transcription factor | chr5:1639529-1640550 REVERSEmoderately similar to ( 206) loc_os01g48320 12001.m43140 protein 6b-interacting protein 1, putative, expressed seq=cds; coord=8:150144896..150146384:-1; parent_gene=GRMZM2G163157	9.58023e-12	1.24332e-10
GRMZM2G016637_T01	25.9328	46.8617	1.02126	RNA.regulation of transcription.Trihelix, Triple-Helix transcription factor family	weakly similar to ( 103) AT5G01380 | Symbols: | transcription factor | chr5:155784-157451 REVERSEweakly similar to ( 197) loc_os05g03740 12005.m04908 protein transcription factor GT-3b, putative seq=cds; coord=6:25704008..25705812:-1; parent_gene=GRMZM2G016637	3.52013e-10	3.80018e-09
GRMZM2G375307_T01	20.7065	38.5724	1.0672	RNA.regulation of transcription.Trihelix, Triple-Helix transcription factor family	weakly similar to ( 132) AT3G54390 | Symbols: | transcription factor | chr3:20137912-20138863 REVERSEmoderately similar to ( 353) loc_os09g38570 12009.m06798 protein expressed protein seq=cds; coord=7:145738120..145742498:-1; parent_gene=GRMZM2G375307	4.93635e-12	6.58544e-11
GRMZM2G380094_T01	15.4066	29.3097	1.09625	RNA.regulation of transcription.Trihelix, Triple-Helix transcription factor family	weakly similar to ( 155) AT3G11100 | Symbols: | transcription factor | chr3:3476490-3477320 REVERSEmoderately similar to ( 357) loc_os02g35690 12002.m100239 protein 6b-interacting protein 1, putative, expressed seq=cds; coord=5:175054040..175055248:1; parent_gene=GRMZM2G380094	1.0369e-07	8.05013e-07
GRMZM2G375307_T02	6.88757	17.0471	1.4754	RNA.regulation of transcription.Trihelix, Triple-Helix transcription factor family	weakly similar to ( 132) AT3G54390 | Symbols: | transcription factor | chr3:20137912-20138863 REVERSEmoderately similar to ( 349) loc_os09g38570 12009.m06798 protein expressed protein seq=cds; coord=7:145740191..145741808:-1; parent_gene=GRMZM2G375307	4.50291e-10	4.80171e-09
GRMZM2G021831_T01	2.97758	10.2697	1.95443	RNA.regulation of transcription.Trihelix, Triple-Helix transcription factor family	weakly similar to ( 152) AT3G11100 | Symbols: | transcription factor | chr3:3476490-3477320 REVERSEmoderately similar to ( 359) loc_os04g36790 12004.m08719 protein 6b-interacting protein 1, putative, expressed seq=cds; coord=2:45778701..45780304:1; parent_gene=GRMZM2G021831	4.35399e-10	4.65468e-09
GRMZM2G160990_T01	0.425672	6.06039	3.9993	RNA.regulation of transcription.Trihelix, Triple-Helix transcription factor family	very weakly similar to (96.3) AT4G28300 | Symbols: | hydroxyproline-rich glycoprotein family protein | chr4:14015414-14016823 FORWARDmoderately similar to ( 479) loc_os01g48220 12001.m11014 protein expressed protein seq=cds; coord=8:149981862..149984439:-1; parent_gene=GRMZM2G160990	1.84893e-17	4.10595e-16
grmzm2g042552_t01	23.3213	2.96473	-2.80571	RNA.regulation of transcription.SNF7	weakly similar to ( 136) AT5G22950 | Symbols: VPS24.1 | VPS24.1 | chr5:7681380-7682720 FORWARDweakly similar to ( 174) loc_os03g01810 12003.m05725 protein charged multivesicular body protein 3, putative, expressed seq=cds; coord=1:2783894..2786103:1; parent_gene=GRMZM2G042552	9.52e-27	4.01e-25
grmzm2g149153_t01	40.7899	13.0649	-1.47452	RNA.regulation of transcription.SET-domain transcriptional regulator family	nearly identical (1655) AT4G15180 | Symbols: SDG2, ATXR3 | SDG2 (SET DOMAIN-CONTAINING PROTEIN 2) | chr4:8651999-8662178 FORWARDnearly identical (1510) loc_os08g08210 12008.m04956 protein histone-lysine N-methyltransferase ATXR3, putative, expressed seq=cds; coord=4:29347895..29360275:-1; parent_gene=GRMZM2G149153	6.78e-28	3.17e-26
grmzm2g473138_t01	26.9164	10.7003	-1.1638	RNA.regulation of transcription.SET-domain transcriptional regulator family	moderately similar to ( 327) AT5G42400 | Symbols: ATXR7, SDG25 | SDG25 (SET DOMAIN PROTEIN 25) | chr5:16954469-16960671 REVERSEvery weakly similar to ( 100) EZ2_MAIZE Polycomb protein EZ2 (Enhancer of zeste protein 2) - Zea mays (Maize)highly similar to ( 709) loc_os12g41900 12012.m07971 protein SET domain containing protein, expressed seq=cds; coord=10:4015808..4020018:-1; parent_gene=GRMZM2G473…	2.29e-11	2.84e-10
grmzm2g318803_t01	26.1977	8.55341	-1.44972	RNA.regulation of transcription.SET-domain transcriptional regulator family	moderately similar to ( 423) AT1G04050 | Symbols: SUVR1, SDG13 | SUVR1 (ARABIDOPSIS HOMOLOG OF SU(VAR)3-9 1); histone-lysine N-methyltransferase/ zinc ion binding | chr1:1045967-1049196 REVERSEhighly similar to ( 514) loc_os02g40770 12002.m100281 protein pre-SET motif family protein, expressed seq=cds; coord=1:201626846..201631389:-1; parent_gene=GRMZM2G318803	5.42e-16	1.07e-14
grmzm2g170412_t01	22.7256	4.76474	-2.08486	RNA.regulation of transcription.SET-domain transcriptional regulator family	highly similar to ( 642) AT4G27910 | Symbols: ATX4, SDG16 | SDG16 (SET DOMAIN PROTEIN 16); protein binding / zinc ion binding | chr4:13894694-13900256 FORWARDnearly identical (1051) loc_os01g46700 12001.m10867 protein SET domain containing protein, expressed seq=cds; coord=8:147718464..147724348:1; parent_gene=GRMZM2G170412	2.14e-23	7.22e-22
grmzm2g045507_t01	9.03932	3.00018	-1.42184	RNA.regulation of transcription.SET-domain transcriptional regulator family	moderately similar to ( 444) AT2G18850 | Symbols: | FUNCTIONS IN: molecular_function unknown; INVOLVED IN: biological_process unknown; EXPRESSED IN: 22 plant structures; EXPRESSED DURING: 13 growth stages; CONTAINS InterPro DOMAIN/s: SET (InterPro:IPR001214); BEST Arabidopsis thaliana protein match is: SET domain-containing protein (TAIR:AT3G07670.1); Has 597 Blast hits to 594 proteins in 119 spe…	1.9e-06	1.2e-05
GRMZM2G305124_T01	4.37667	17.1138	2.1361	RNA.regulation of transcription.SET-domain transcriptional regulator family	moderately similar to ( 394) AT5G24330 | Symbols: ATXR6, SDG34 | ATXR6; DNA binding / protein binding | chr5:8295245-8296997 REVERSEmoderately similar to ( 494) loc_os02g03030 12002.m05653 protein histone-lysine N-methyltransferase ATXR6, putative, expressed seq=cds; coord=5:71843738..71845004:1; parent_gene=GRMZM2G305124	4.30521e-13	6.41697e-12
grmzm2g363038_t01	59.0348	25.4709	-1.04758	RNA.regulation of transcription.PWWP domain protein	moderately similar to ( 331) AT5G08230 | Symbols: | PWWP domain-containing protein | chr5:2643846-2649788 REVERSEnearly identical (1071) loc_os08g01054 12008.m61966 protein HUA2, putative, expressed seq=cds; coord=4:195532087..195540351:1; parent_gene=GRMZM2G363038	1.98e-15	3.72e-14
AC233870.1_FGT004	0.327574	3.54708	3.60691	RNA.regulation of transcription.PWWP domain protein	very weakly similar to (95.9) AT3G21295 | Symbols: | FUNCTIONS IN: molecular_function unknown; INVOLVED IN: biological_process unknown; LOCATED IN: cellular_component unknown; CONTAINS InterPro DOMAIN/s: PWWP (InterPro:IPR000313); BEST Arabidopsis thaliana protein match is: unknown protein (TAIR:AT1G51745.1); Has 428 Blast hits to 314 proteins in 77 species: Archae - 0; Bacteria - 111; Metazoa - …	8.01214e-09	7.3374e-08
grmzm2g140156_t01	60.5587	26.6815	-1.01542	RNA.regulation of transcription.putative transcription regulator	highly similar to ( 815) AT3G43240 | Symbols: | ARID/BRIGHT DNA-binding domain-containing protein | chr3:15210032-15214440 REVERSEnearly identical (1342) loc_os09g26390 12009.m059981 protein DNA binding protein, putative, expressed seq=cds; coord=2:183392279..183403901:-1; parent_gene=GRMZM2G140156	7.68e-14	1.23e-12
grmzm2g138407_t01	55.9949	24.5703	-1.01897	RNA.regulation of transcription.putative transcription regulator	weakly similar to ( 108) AT4G07950 | Symbols: | DNA-directed RNA polymerase III family protein | chr4:4798910-4799510 FORWARDweakly similar to ( 187) loc_os02g45120 12002.m100435 protein expressed protein seq=cds; coord=4:154796569..154799473:1; parent_gene=GRMZM2G138407	7.11e-07	4.81e-06
grmzm2g370715_t01	60.9318	23.1741	-1.22935	RNA.regulation of transcription.putative transcription regulator	moderately similar to ( 495) AT5G04290 | Symbols: KTF1 | KTF1 (KOW DOMAIN-CONTAINING TRANSCRIPTION FACTOR 1); nucleotide binding | chr5:1196069-1202653 FORWARDhighly similar to ( 690) loc_os05g43060 12005.m08436 protein NOWA1 protein, putative, expressed seq=cds; coord=6:157480628..157492290:1; parent_gene=GRMZM2G370715	3.3e-20	9.05e-19
grmzm2g063603_t01	68.1441	21.4098	-1.49938	RNA.regulation of transcription.putative transcription regulator	moderately similar to ( 483) AT5G10940 | Symbols: | transducin family protein / WD-40 repeat family protein | chr5:3448890-3454127 REVERSEhighly similar to ( 747) loc_os03g08830 12003.m06389 protein expressed protein seq=cds; coord=9:149806803..149813920:-1; parent_gene=GRMZM2G063603	1.24e-24	4.55e-23
grmzm2g003638_t01	34.4697	14.0899	-1.11965	RNA.regulation of transcription.putative transcription regulator	moderately similar to ( 265) AT2G36740 | Symbols: SWC2, ATSWC2 | SWC2; DNA binding / transcription factor | chr2:15407066-15409430 REVERSEmoderately similar to ( 412) loc_os08g09320 12008.m05066 protein vacuolar protein sorting protein 72, putative, expressed seq=cds; coord=6:1711127..1714270:1; parent_gene=GRMZM2G003638	1.01e-08	9.15e-08
ac234160.1_fgt001	31.9304	13.5589	-1.06644	RNA.regulation of transcription.putative transcription regulator	moderately similar to ( 249) AT1G70060 | Symbols: SNL4 | SNL4 (SIN3-LIKE 4) | chr1:26383789-26389568 FORWARDmoderately similar to ( 338) loc_os01g01960 12001.m06838 protein paired amphipathic helix repeat family protein, expressed seq=cds; coord=8:8136058..8139636:-1; parent_gene=AC234160.1_FG001	1.24e-09	1.25e-08
grmzm2g337659_t01	25.7734	11.0623	-1.05407	RNA.regulation of transcription.putative transcription regulator	moderately similar to ( 298) AT5G60410 | Symbols: ATSIZ1, SIZ1 | SIZ1; DNA binding / SUMO ligase | chr5:24295226-24300792 FORWARDhighly similar to ( 643) loc_os05g03430 12005.m083605 protein sumoylation ligase E3, putative, expressed seq=cds; coord=6:27504390..27517569:-1; parent_gene=GRMZM2G337659	7.42e-12	9.74e-11
grmzm2g100246_t01	24.9421	10.9934	-1.01407	RNA.regulation of transcription.putative transcription regulator	moderately similar to ( 307) AT5G18230 | Symbols: | transcription regulator NOT2/NOT3/NOT5 family protein | chr5:6021610-6027031 REVERSEmoderately similar to ( 441) loc_os03g44900 12003.m35336 protein CCR4-NOT transcription complex subunit 3, putative, expressed seq=cds; coord=5:15725881..15731553:1; parent_gene=GRMZM2G100246	1.98e-07	1.47e-06
grmzm2g352891_t01	31.9293	10.542	-1.42922	RNA.regulation of transcription.putative transcription regulator	moderately similar to ( 226) AT5G60170 | Symbols: | RNA binding / nucleic acid binding / nucleotide binding / protein binding / zinc ion binding | chr5:24228178-24232394 FORWARDmoderately similar to ( 268) loc_os01g11130 12001.m07733 protein expressed protein seq=cds; coord=3:4140024..4147865:1; parent_gene=GRMZM2G352891	7.27e-10	7.55e-09
grmzm2g002999_t01	22.1777	9.42338	-1.06431	RNA.regulation of transcription.putative transcription regulator	moderately similar to ( 214) AT5G60410 | Symbols: ATSIZ1, SIZ1 | SIZ1; DNA binding / SUMO ligase | chr5:24295226-24300792 FORWARDmoderately similar to ( 442) loc_os03g50980 12003.m10080 protein sumoylation ligase E3, putative, expressed seq=cds; coord=3:229251414..229253817:-1; parent_gene=GRMZM2G002999	1.37e-07	1.04e-06
grmzm2g110304_t01	24.1504	9.21907	-1.22203	RNA.regulation of transcription.putative transcription regulator	moderately similar to ( 351) AT1G15910 | Symbols: | XH/XS domain-containing protein / XS zinc finger domain-containing protein | chr1:5465951-5468723 FORWARDmoderately similar to ( 453) loc_os01g44230 12001.m43488 protein transcription factor X1, putative, expressed seq=cds; coord=1:248123703..248141382:1; parent_gene=GRMZM2G110304	1.2e-10	1.37e-09
grmzm2g164835_t01	20.4046	7.72735	-1.22783	RNA.regulation of transcription.putative transcription regulator	highly similar to ( 813) AT1G30680 | Symbols: | toprim domain-containing protein | chr1:10881665-10886060 FORWARDnearly identical (1098) loc_os06g45980 12006.m09126 protein nucleic acid binding protein, putative, expressed seq=cds; coord=6:92610561..92616400:1; parent_gene=GRMZM2G164835	7.93e-11	9.24e-10
grmzm2g132227_t01	21.4508	5.59702	-1.77032	RNA.regulation of transcription.putative transcription regulator	weakly similar to ( 192) AT5G10940 | Symbols: | transducin family protein / WD-40 repeat family protein | chr5:3448890-3454127 REVERSEmoderately similar to ( 204) loc_os03g08830 12003.m06389 protein expressed protein seq=cds; coord=9:149816294..149818152:-1; parent_gene=GRMZM2G132227	1.68e-06	1.07e-05
grmzm2g153725_t01	16.5883	5.08193	-1.53833	RNA.regulation of transcription.putative transcription regulator	moderately similar to ( 353) AT1G59453 | Symbols: | transcription factor-related | chr1:21846902-21853384 REVERSEhighly similar to ( 962) loc_os02g42200 12002.m100290 protein expressed protein seq=cds; coord=5:187314274..187319912:-1; parent_gene=GRMZM2G153725	5.05e-11	6.02e-10
grmzm2g427408_t01	12.5542	4.5722	-1.28889	RNA.regulation of transcription.putative transcription regulator	moderately similar to ( 280) AT4G39680 | Symbols: | SAP domain-containing protein | chr4:18414604-18416938 REVERSEmoderately similar to ( 419) loc_os03g26630 12003.m34873 protein DNA binding protein, putative, expressed seq=cds; coord=7:167028781..167043001:1; parent_gene=GRMZM2G427408	8.25e-08	6.53e-07
grmzm2g473250_t01	15.1765	2.73893	-2.30168	RNA.regulation of transcription.putative transcription regulator	weakly similar to ( 102) AT2G19260 | Symbols: | ELM2 domain-containing protein / PHD finger family protein | chr2:8357331-8359931 FORWARDweakly similar to ( 132) loc_os04g34720 12004.m08565 protein DNA binding protein, putative, expressed seq=cds; coord=6:94507788..94510528:-1; parent_gene=GRMZM2G473250	4.98e-10	5.27e-09
grmzm2g011436_t01	7.83295	2.64539	-1.39481	RNA.regulation of transcription.putative transcription regulator	moderately similar to ( 446) AT1G15910 | Symbols: | XH/XS domain-containing protein / XS zinc finger domain-containing protein | chr1:5465951-5468723 FORWARDhighly similar to ( 786) loc_os01g03570 12001.m06995 protein transcription factor X1, putative, expressed seq=cds; coord=3:24219771..24232372:-1; parent_gene=GRMZM2G011436	2.55e-06	1.57e-05
grmzm5g866423_t02	17.2351	1.99683	-2.93996	RNA.regulation of transcription.putative transcription regulator	moderately similar to ( 348) AT3G43240 | Symbols: | ARID/BRIGHT DNA-binding domain-containing protein | chr3:15210032-15214440 REVERSEmoderately similar to ( 426) loc_os08g35000 12008.m080175 protein DNA binding protein, putative, expressed seq=cds; coord=1:209536012..209538518:1; parent_gene=GRMZM5G866423	1.28e-16	2.66e-15
grmzm2g153725_t02	5.96768	1.86317	-1.51133	RNA.regulation of transcription.putative transcription regulator	highly similar to ( 608) AT1G59453 | Symbols: | transcription factor-related | chr1:21846902-21853384 REVERSEnearly identical (1538) loc_os02g42200 12002.m100290 protein expressed protein seq=cds; coord=5:187288362..187316677:-1; parent_gene=GRMZM2G153725	1.09e-08	9.84e-08
grmzm2g362557_t01	5.33054	1.17319	-2.0173	RNA.regulation of transcription.putative transcription regulator	moderately similar to ( 288) AT1G43260 | Symbols: | FUNCTIONS IN: molecular_function unknown; INVOLVED IN: biological_process unknown; LOCATED IN: cellular_component unknown; CONTAINS InterPro DOMAIN/s: Protein of unknown function DUF659 (InterPro:IPR007021); BEST Arabidopsis thaliana protein match is: protein dimerization (TAIR:AT5G31412.1); Has 380 Blast hits to 376 proteins in 17 species: Arch…	8.89e-08	6.99e-07
grmzm2g312672_t01	5.91626	0.647103	-3.02559	RNA.regulation of transcription.putative transcription regulator	weakly similar to ( 144) AT5G63700 | Symbols: | zinc finger (C3HC4 type RING finger) family protein | chr5:25493934-25497632 REVERSEmoderately similar to ( 323) loc_os01g66140 12001.m150796 protein plus-3 domain containing protein, expressed seq=cds; coord=3:170707113..170710209:1; parent_gene=GRMZM2G312672	6.2e-10	6.49e-09
grmzm2g075096_t02	3.0992	0.294379	-3.22607	RNA.regulation of transcription.putative transcription regulator	moderately similar to ( 214) AT1G59453 | Symbols: | transcription factor-related | chr1:21846902-21853384 REVERSEhighly similar to ( 522) loc_os02g42200 12002.m100290 protein expressed protein seq=cds; coord=5:207198225..207202126:1; parent_gene=GRMZM2G075096	1.15e-06	7.49e-06
grmzm2g330024_t01	1.52175	0.155821	-3.11984	RNA.regulation of transcription.putative transcription regulator	moderately similar to ( 434) AT1G77800 | Symbols: | PHD finger family protein | chr1:29253800-29260190 FORWARDnearly identical (1159) loc_os06g10690 12006.m32013 protein C1-like domain containing protein, expressed seq=cds; coord=6:109391739..109405354:-1; parent_gene=GRMZM2G330024	2.53e-07	1.85e-06
grmzm2g468479_t02	3.36705		-32.6331	RNA.regulation of transcription.putative transcription regulator	very weakly similar to (80.9) AT3G21430 | Symbols: ATALY3, ALY3 | DNA binding | chr3:7544800-7552841 REVERSEweakly similar to ( 180) loc_os01g09760 12001.m07600 protein DIRP family protein, expressed seq=cds; coord=3:6094357..6096563:1; parent_gene=GRMZM2G468479	2.46e-09	2.4e-08
grmzm2g070831_t01	2.54811		-31.8736	RNA.regulation of transcription.putative transcription regulator	highly similar to ( 523) AT3G05060 | Symbols: | SAR DNA-binding protein, putative | chr3:1413174-1415564 REVERSEhighly similar to ( 583) loc_os03g22740 12003.m07672 protein nucleolar protein NOP5, putative, expressed seq=cds; coord=2:225766169..225769071:1; parent_gene=GRMZM2G070831	1.31e-06	8.45e-06
GRMZM2G119168_T01	29.6312	110.658	2.06732	RNA.regulation of transcription.putative transcription regulator	weakly similar to ( 141) AT2G45430 | Symbols: | DNA-binding protein-related | chr2:18727848-18728801 FORWARDmoderately similar to ( 258) loc_os03g16350 12003.m07070 protein DNA-binding protein, putative, expressed seq=cds; coord=1:39332349..39333847:1; parent_gene=GRMZM2G119168	5.22941e-43	5.26983e-41
GRMZM2G065292_T01	29.2755	59.5325	1.19309	RNA.regulation of transcription.putative transcription regulator	moderately similar to ( 437) AT3G11330 | Symbols: | leucine-rich repeat family protein | chr3:3552330-3554695 REVERSEvery weakly similar to (81.3) RPK1_IPONI Receptor-like protein kinase precursor (EC 2.7.11.1) - Ipomoea nil (Japanese morning glory) (Pharbitis nil)highly similar to ( 656) loc_os04g40080 12004.m08992 protein protein lap1, putative, expressed seq=cds; coord=10:125125070..125130397:…	4.39555e-17	9.45417e-16
GRMZM2G030523_T01	20.244	45.536	1.33881	RNA.regulation of transcription.putative transcription regulator	moderately similar to ( 459) AT2G29570 | Symbols: PCNA2, ATPCNA2 | PCNA2 (PROLIFERATING CELL NUCLEAR ANTIGEN 2); DNA binding / DNA polymerase processivity factor | chr2:12650139-12651598 REVERSEhighly similar to ( 513) PCNA_MAIZE Proliferating cell nuclear antigen (PCNA) - Zea mays (Maize)moderately similar to ( 492) loc_os02g56130 12002.m10637 protein proliferating cell nuclear antigen, putative…	1.22131e-14	2.1217e-13
GRMZM2G408897_T01	11.5	24.0394	1.2328	RNA.regulation of transcription.putative transcription regulator	moderately similar to ( 417) AT1G66170 | Symbols: MMD1 | MMD1 (MALE MEIOCYTE DEATH 1); DNA binding / protein binding / zinc ion binding | chr1:24638793-24641222 REVERSEhighly similar to ( 932) loc_os03g50780 12003.m10064 protein PHD-finger family protein, expressed seq=cds; coord=5:10436880..10440158:1; parent_gene=GRMZM2G408897	2.99649e-12	4.07928e-11
GRMZM2G052688_T01	7.48971	14.49	1.12433	RNA.regulation of transcription.putative transcription regulator	moderately similar to ( 395) AT1G04020 | Symbols: ATBARD1, BARD1 | BARD1 (BREAST CANCER ASSOCIATED RING 1); DNA binding / transcription coactivator | chr1:1036610-1040045 FORWARDhighly similar to ( 882) loc_os04g43300 12004.m09294 protein ATBRCA1, putative, expressed seq=cds; coord=2:28673566..28677785:-1; parent_gene=GRMZM2G052688	1.64175e-08	1.44591e-07
GRMZM2G086876_T01	2.27655	6.70588	1.72788	RNA.regulation of transcription.putative transcription regulator	weakly similar to ( 109) AT2G45850 | Symbols: | DNA-binding family protein | chr2:18871901-18873457 REVERSEmoderately similar to ( 362) loc_os04g58730 12004.m35526 protein DNA binding protein, putative, expressed seq=cds; coord=2:840831..843688:1; parent_gene=GRMZM2G086876	1.28383e-07	9.83139e-07
grmzm2g033962_t01	33.1206	5.58044	-2.40205	RNA.regulation of transcription.Psudo ARR transcription factor family	moderately similar to ( 271) AT5G02810 | Symbols: PRR7, APRR7 | PRR7 (PSEUDO-RESPONSE REGULATOR 7); transcription regulator/ two-component response regulator | chr5:638283-641461 REVERSEhighly similar to ( 701) PRR37_ORYSA Two-component response regulator-like PRR37 (Pseudo-response regulator 37) (OsPRR37) - Oryza sativa (Rice)highly similar to ( 701) loc_os07g49460 12007.m079806 protein two-comp…	5.66e-34	3.63e-32
grmzm2g488465_t01	14.4276	4.18999	-1.61124	RNA.regulation of transcription.Psudo ARR transcription factor family	weakly similar to ( 137) AT5G24470 | Symbols: APRR5, PRR5 | APRR5 (ARABIDOPSIS PSEUDO-RESPONSE REGULATOR 5); transcription regulator/ two-component response regulator | chr5:8356204-8358873 REVERSEweakly similar to ( 155) PRR95_ORYSA Two-component response regulator-like PRR95 (Pseudo-response regulator 95) (OsPRR95) - Oryza sativa (Rice)moderately similar to ( 441) loc_os11g05930 12011.m079940 p…	3.99e-06	2.37e-05
grmzm2g005732_t03	7.69573	2.49593	-1.45558	RNA.regulation of transcription.Psudo ARR transcription factor family	weakly similar to ( 135) AT5G02810 | Symbols: PRR7, APRR7 | PRR7 (PSEUDO-RESPONSE REGULATOR 7); transcription regulator/ two-component response regulator | chr5:638283-641461 REVERSEhighly similar to ( 588) PRR37_ORYSA Two-component response regulator-like PRR37 (Pseudo-response regulator 37) (OsPRR37) - Oryza sativa (Rice)highly similar to ( 588) loc_os07g49460 12007.m079806 protein two-componen…	1.13e-06	7.38e-06
grmzm2g179024_t01	13.0565	2.35254	-2.30584	RNA.regulation of transcription.Psudo ARR transcription factor family	moderately similar to ( 282) AT5G24470 | Symbols: APRR5, PRR5 | APRR5 (ARABIDOPSIS PSEUDO-RESPONSE REGULATOR 5); transcription regulator/ two-component response regulator | chr5:8356204-8358873 REVERSEhighly similar to ( 837) PRR95_ORYSA Two-component response regulator-like PRR95 (Pseudo-response regulator 95) (OsPRR95) - Oryza sativa (Rice)highly similar to ( 837) loc_os09g36220 12009.m06571 pr…	9.29e-18	2.12e-16
grmzm2g367834_t01	5.94219	1.48944	-1.82665	RNA.regulation of transcription.Psudo ARR transcription factor family	moderately similar to ( 289) AT5G24470 | Symbols: APRR5, PRR5 | APRR5 (ARABIDOPSIS PSEUDO-RESPONSE REGULATOR 5); transcription regulator/ two-component response regulator | chr5:8356204-8358873 REVERSEhighly similar to ( 758) PRR95_ORYSA Two-component response regulator-like PRR95 (Pseudo-response regulator 95) (OsPRR95) - Oryza sativa (Rice)highly similar to ( 758) loc_os09g36220 12009.m06571 pr…	4.34e-06	2.56e-05
grmzm2g157820_t02	29.5551	12.1585	-1.10955	RNA.regulation of transcription.Polycomb Group (PcG)	highly similar to ( 835) AT2G23380 | Symbols: CLF, ICU1, SDG1, SET1 | CLF (CURLY LEAF); transcription factor | chr2:9955570-9960117 FORWARDnearly identical (1714) EZ1_MAIZE Polycomb protein EZ1 (Enhancer of zeste protein 1) - Zea mays (Maize)nearly identical (1289) loc_os06g16390 12006.m06352 protein polycomb protein EZ1, putative, expressed seq=cds; coord=6:79459102..79469316:-1; parent_gene=GRM…	1.07e-11	1.38e-10
grmzm2g157422_t01	4.60889		-33.7242	RNA.regulation of transcription.Polycomb Group (PcG)	moderately similar to ( 327) AT5G51230 | Symbols: EMF2, VEF2, CYR1 | EMF2 (EMBRYONIC FLOWER 2); DNA binding / transcription factor | chr5:20824153-20829344 FORWARDhighly similar to ( 571) loc_os09g13630 12009.m04624 protein polycomb protein EMBRYONIC FLOWER 2, putative, expressed seq=cds; coord=7:84488442..84561091:1; parent_gene=GRMZM2G157422	1.57e-19	4.11e-18
grmzm2g306859_t01	35.0218	14.0949	-1.14609	RNA.regulation of transcription.PHD finger transcription factor	moderately similar to ( 275) AT2G37520 | Symbols: | PHD finger family protein | chr2:15745033-15749615 REVERSEmoderately similar to ( 458) loc_os06g01170 12006.m04857 protein protein binding protein, putative, expressed seq=cds; coord=9:29160587..29163785:1; parent_gene=GRMZM2G306859	1.29e-08	1.15e-07
grmzm2g377887_t01	29.2026	10.0746	-1.36757	RNA.regulation of transcription.PHD finger transcription factor	moderately similar to ( 325) AT2G27980 | Symbols: | protein binding / zinc ion binding | chr2:11913950-11919741 REVERSEmoderately similar to ( 431) loc_os06g51450 12006.m09668 protein PHD zinc finger protein, putative, expressed seq=cds; coord=5:65948915..65954242:1; parent_gene=GRMZM2G377887	5.04e-11	6.01e-10
grmzm2g024976_t01	20.0885	8.82183	-1.01799	RNA.regulation of transcription.Nucleosome/chromatin assembly factor group	moderately similar to ( 271) AT1G04880 | Symbols: | high mobility group (HMG1/2) family protein / ARID/BRIGHT DNA-binding domain-containing protein | chr1:1376106-1378264 REVERSEhighly similar to ( 546) loc_os02g27060 12002.m07850 protein HMG box family protein, expressed seq=cds; coord=5:159201478..159208661:-1; parent_gene=GRMZM2G024976	5.49e-06	3.17e-05
grmzm2g337749_t01	42.903	6.17879	-2.62862	RNA.regulation of transcription.Nucleosome/chromatin assembly factor group	weakly similar to ( 190) AT5G08630 | Symbols: | DDT domain-containing protein | chr5:2798575-2802138 REVERSEmoderately similar to ( 369) loc_os02g35100 12002.m100234 protein DDT domain containing protein, expressed seq=cds; coord=5:173390747..173396034:-1; parent_gene=GRMZM2G337749	3.26e-33	2e-31
ac207342.3_fgt001	10.3447	1.45475	-2.6586	RNA.regulation of transcription.NIN-like bZIP-related family	weakly similar to ( 122) AT5G53040 | Symbols: | RWP-RK domain-containing protein | chr5:21506967-21507948 REVERSEmoderately similar to ( 206) loc_os01g37100 12001.m10005 protein RWP-RK domain containing protein, expressed seq=cds; coord=8:136380345..136381870:1; parent_gene=AC207342.3_FG001	1.03e-09	1.05e-08
grmzm2g079632_t01	156.421	50.7287	-1.45062	RNA.regulation of transcription.NAC domain transcription factor family	moderately similar to ( 227) AT3G15500 | Symbols: ATNAC3, ANAC055 | ANAC055 (ARABIDOPSIS NAC DOMAIN CONTAINING PROTEIN 55); transcription factor | chr3:5234731-5235882 FORWARDmoderately similar to ( 331) NAC67_ORYSA NAC domain-containing protein 67 (ONAC067) - Oryza sativa (Rice)moderately similar to ( 331) loc_os07g12340 12007.m05687 protein NAC domain-containing protein 67, putative, expressed …	3.34e-26	1.36e-24
grmzm2g430849_t01	84.059	26.4852	-1.49788	RNA.regulation of transcription.NAC domain transcription factor family	moderately similar to ( 241) AT3G15510 | Symbols: ATNAC2, ANAC056, NARS1 | ATNAC2 (ARABIDOPSIS NAC DOMAIN CONTAINING PROTEIN 2); transcription factor | chr3:5243696-5245037 FORWARDmoderately similar to ( 229) NAC48_ORYSA NAC domain-containing protein 48 (ONAC048) - Oryza sativa (Rice)moderately similar to ( 406) loc_os07g48450 12007.m29337 protein NAC domain-containing protein 18, putative, expre…	1.05e-22	3.38e-21
grmzm2g174070_t01	24.2358	6.05908	-1.83167	RNA.regulation of transcription.NAC domain transcription factor family	moderately similar to ( 384) AT1G65910 | Symbols: anac028 | anac028 (Arabidopsis NAC domain containing protein 28); transcription factor | chr1:24520933-24524108 REVERSEmoderately similar to ( 214) NAC74_ORYSA NAC domain-containing protein 74 (ONAC074) - Oryza sativa (Rice)highly similar to ( 899) loc_os03g02800 12003.m05820 protein ANAC086, putative, expressed seq=cds; coord=9:153957735..1539621…	4.62e-20	1.25e-18
grmzm2g123667_t01	14.1592	4.58319	-1.45968	RNA.regulation of transcription.NAC domain transcription factor family	weakly similar to ( 111) NAC71_ORYSA NAC domain-containing protein 71 (ONAC071) - Oryza sativa (Rice)weakly similar to ( 111) loc_os11g08210 12011.m05017 protein NAC domain-containing protein 71, putative, expressed seq=cds; coord=4:207978207..207980920:-1; parent_gene=GRMZM2G123667	1.05e-09	1.07e-08
grmzm2g406204_t01	4.0698	0.0960113	-5.23872	RNA.regulation of transcription.NAC domain transcription factor family	moderately similar to ( 384) AT1G65910 | Symbols: anac028 | anac028 (Arabidopsis NAC domain containing protein 28); transcription factor | chr1:24520933-24524108 REVERSEmoderately similar to ( 216) NAC74_ORYSA NAC domain-containing protein 74 (ONAC074) - Oryza sativa (Rice)highly similar to ( 837) loc_os03g02800 12003.m05820 protein ANAC086, putative, expressed seq=cds; coord=1:4248315..4252340:1…	3.3e-11	4.02e-10
grmzm2g081930_t01	4.39258		-32.559	RNA.regulation of transcription.NAC domain transcription factor family	moderately similar to ( 244) AT4G28530 | Symbols: anac074 | anac074 (Arabidopsis NAC domain containing protein 74); transcription factor | chr4:14090725-14094603 REVERSEweakly similar to ( 179) NAC77_ORYSA NAC domain-containing protein 77 (ONAC077) (ONAC300) - Oryza sativa (Rice)moderately similar to ( 361) loc_os04g43560 12004.m09316 protein NAC domain-containing protein 21/22, putative, express…	8.49e-09	7.74e-08
GRMZM2G059428_T01	12.6011	27.75	1.30677	RNA.regulation of transcription.NAC domain transcription factor family	moderately similar to ( 244) AT2G17040 | Symbols: anac036 | anac036 (Arabidopsis NAC domain containing protein 36); transcription factor | chr2:7407123-7408120 FORWARDweakly similar to ( 176) NAC68_ORYSA NAC domain-containing protein 68 (ONAC068) - Oryza sativa (Rice)moderately similar to ( 340) loc_os03g04070 12003.m05939 protein NAC domain-containing protein 68, putative, expressed seq=cds; coo…	1.11502e-10	1.28022e-09
GRMZM2G114850_T01	9.92791	29.7552	1.74986	RNA.regulation of transcription.NAC domain transcription factor family	moderately similar to ( 218) AT1G56010 | Symbols: NAC1, ANAC022 | NAC1; transcription factor | chr1:20946852-20949144 REVERSEweakly similar to ( 183) NAC77_ORYSA NAC domain-containing protein 77 (ONAC077) (ONAC300) - Oryza sativa (Rice)moderately similar to ( 369) loc_os12g41680 12012.m07949 protein NAC domain-containing protein 21/22, putative, expressed seq=cds; coord=3:122071793..122076122:1; …	1.68629e-19	4.37466e-18
GRMZM2G180328_T01	5.38145	17.1309	1.84232	RNA.regulation of transcription.NAC domain transcription factor family	moderately similar to ( 328) AT1G01720 | Symbols: ATAF1, ANAC002 | ATAF1; transcription activator/ transcription factor | chr1:268471-269514 FORWARDmoderately similar to ( 411) NAC48_ORYSA NAC domain-containing protein 48 (ONAC048) - Oryza sativa (Rice)moderately similar to ( 472) loc_os05g34830 12005.m27596 protein NAC domain-containing protein 48, putative, expressed seq=cds; coord=6:147868257.…	1.89481e-12	2.62328e-11
GRMZM2G126936_T01	1.96707	7.25779	2.05215	RNA.regulation of transcription.NAC domain transcription factor family	weakly similar to ( 101) AT5G08790 | Symbols: ATAF2, anac081 | ATAF2; transcription activator | chr5:2859113-2860144 REVERSEweakly similar to ( 129) NAC67_ORYSA NAC domain-containing protein 67 (ONAC067) - Oryza sativa (Rice)moderately similar to ( 233) loc_os03g60080 12003.m10901 protein NAC domain-containing protein 67, putative, expressed seq=cds; coord=9:145843393..145844700:-1; parent_gene=G…	1.39935e-06	8.9767e-06
GRMZM2G074358_T01		25.4726	35.2672	RNA.regulation of transcription.NAC domain transcription factor family	moderately similar to ( 227) AT2G17040 | Symbols: anac036 | anac036 (Arabidopsis NAC domain containing protein 36); transcription factor | chr2:7407123-7408120 FORWARDweakly similar to ( 147) NAC67_ORYSA NAC domain-containing protein 67 (ONAC067) - Oryza sativa (Rice)moderately similar to ( 349) loc_os06g51070 12006.m09630 protein NAC domain-containing protein 68, putative, expressed seq=cds; coo…	2.77463e-50	3.73306e-48
grmzm2g014902_t01	49.4451	2.509	-4.13164	RNA.regulation of transcription.MYB-related transcription factor family	moderately similar to ( 289) AT1G01060 | Symbols: LHY, LHY1 | LHY (LATE ELONGATED HYPOCOTYL); DNA binding / transcription factor | chr1:33992-37061 REVERSEhighly similar to ( 872) loc_os08g06110 12008.m080033 protein LHY protein, putative, expressed seq=cds; coord=4:32498151..32531144:1; parent_gene=GRMZM2G014902	3.73e-86	1.68e-83
grmzm5g833032_t03	7.81308	0.651505	-3.41785	RNA.regulation of transcription.MYB-related transcription factor family	weakly similar to ( 158) AT5G52660 | Symbols: | myb family transcription factor | chr5:21359423-21362037 REVERSEmoderately similar to ( 259) loc_os02g45670 12002.m100315 protein DNA binding protein, putative, expressed seq=cds; coord=5:196281617..196295619:-1; parent_gene=GRMZM5G833032	2.2e-15	4.1e-14
GRMZM2G034110_T01	114.182	225.827	1.15693	RNA.regulation of transcription.MYB-related transcription factor family	moderately similar to ( 300) AT5G47390 | Symbols: | myb family transcription factor | chr5:19227001-19228546 FORWARDmoderately similar to ( 467) loc_os10g41200 12010.m21804 protein ZmMybst1, putative, expressed seq=cds; coord=9:115490345..115493761:1; parent_gene=GRMZM2G034110	4.36874e-20	1.1882e-18
GRMZM2G115070_T01	4.41735	28.9121	2.88186	RNA.regulation of transcription.MYB-related transcription factor family	very weakly similar to ( 100) AT3G09600 | Symbols: | myb family transcription factor | chr3:2946459-2948200 FORWARDweakly similar to ( 126) loc_os05g07010 12005.m05227 protein myb-like DNA-binding domain containing protein, expressed seq=cds; coord=1:300799980..300800880:1; parent_gene=GRMZM2G115070	5.27255e-23	1.73651e-21
grmzm2g098884_t01	60.6836	26.3493	-1.0384	RNA.regulation of transcription.MYB domain transcription factor family	moderately similar to ( 290) AT5G41020 | Symbols: | myb family transcription factor | chr5:16425883-16427649 REVERSEmoderately similar to ( 462) loc_os06g19980 12006.m06655 protein myb-like DNA-binding domain containing protein, expressed seq=cds; coord=4:30932067..30947336:1; parent_gene=GRMZM2G098884	1.33e-12	1.88e-11
grmzm2g405094_t01	70.4731	21.623	-1.53631	RNA.regulation of transcription.MYB domain transcription factor family	moderately similar to ( 266) AT4G38620 | Symbols: ATMYB4, MYB4 | MYB4; DNA binding / transcription factor | chr4:18053866-18054876 FORWARDmoderately similar to ( 273) MYB38_MAIZE Myb-related protein Zm38 - Zea mays (Maize)moderately similar to ( 325) loc_os01g65370 12001.m12650 protein transcription repressor MYB4, putative seq=cds; coord=8:165875616..165876842:-1; parent_gene=GRMZM2G405094	6.24e-18	1.45e-16
grmzm2g093789_t01	13.1478	4.79082	-1.2899	RNA.regulation of transcription.MYB domain transcription factor family	weakly similar to ( 170) AT2G26960 | Symbols: AtMYB81 | AtMYB81 (myb domain protein 81); DNA binding / transcription factor | chr2:11506065-11507425 REVERSEweakly similar to ( 176) GAM1_ORYSA Transcription factor GAMYB (OsGAMyb) - Oryza sativa (Rice)moderately similar to ( 229) loc_os06g40330 12006.m08569 protein myb-like DNA-binding domain containing protein, expressed seq=cds; coord=6:89240540.…	1.43e-07	1.08e-06
grmzm2g073826_t01	14.2819	4.38004	-1.53655	RNA.regulation of transcription.MYB domain transcription factor family	very weakly similar to (91.3) AT5G11510 | Symbols: MYB3R-4 | MYB3R-4 (myb domain protein 3R-4); DNA binding / transcription coactivator/ transcription factor | chr5:3680452-3683633 FORWARDweakly similar to ( 113) loc_os02g17190 12002.m06962 protein myb-like DNA-binding domain containing protein, expressed seq=cds; coord=5:135301776..135303063:1; parent_gene=GRMZM2G073826	1.81e-06	1.15e-05
grmzm2g073836_t01	9.54711	2.68518	-1.66416	RNA.regulation of transcription.MYB domain transcription factor family	weakly similar to ( 141) AT4G32730 | Symbols: PC-MYB1, MYB3R-1, ATMYB3R-1, ATMYB3R1 | PC-MYB1; DNA binding / transcription coactivator/ transcription factor | chr4:15791039-15795643 FORWARDweakly similar to ( 173) loc_os02g17190 12002.m06962 protein myb-like DNA-binding domain containing protein, expressed seq=cds; coord=5:135274644..135280463:1; parent_gene=GRMZM2G073836	5.28e-06	3.06e-05
grmzm2g175232_t01	7.66892	0.512603	-3.73458	RNA.regulation of transcription.MYB domain transcription factor family	moderately similar to ( 226) AT5G26660 | Symbols: ATMYB4, ATMYB86 | ATMYB86 (MYB DOMAIN PROTEIN 86); specific transcriptional repressor/ transcription repressor | chr5:9331775-9333044 REVERSEmoderately similar to ( 244) MYB3_HORVU Myb-related protein Hv33 - Hordeum vulgare (Barley)moderately similar to ( 258) loc_os05g46610 12005.m08784 protein myb-related protein Hv33, putative, expressed seq=cd…	2.61e-09	2.54e-08
GRMZM5G803308_T01	120.754	331.511	1.62648	RNA.regulation of transcription.MYB domain transcription factor family	weakly similar to ( 184) AT5G67300 | Symbols: ATMYBR1, ATMYB44, MYBR1 | MYBR1 (MYB DOMAIN PROTEIN R1); DNA binding / transcription factor | chr5:26854109-26855026 FORWARDweakly similar to ( 120) MYB4_ORYSA Myb-related protein Myb4 (OsMyb4) (Transcription factor RLTR1) - Oryza sativa (Rice)moderately similar to ( 325) loc_os06g43090 12006.m08839 protein MYB transcription factor TaMYB1, putative, e…	2.48217e-38	2.01878e-36
GRMZM2G143328_T01	28.0531	79.3172	1.6656	RNA.regulation of transcription.MYB domain transcription factor family	weakly similar to ( 183) AT3G27810 | Symbols: ATMYB21, ATMYB3, MYB21 | ATMYB21 (ARABIDOPSIS THALIANA MYB DOMAIN PROTEIN 21); DNA binding / transcription factor | chr3:10307596-10310093 FORWARDweakly similar to ( 148) MYBA2_ORYSA Myb-related protein MYBAS2 - Oryza sativa (Rice)moderately similar to ( 218) loc_os01g45090 12001.m10715 protein transcription factor MYB21, putative, expressed seq=cds; …	2.53145e-21	7.46277e-20
GRMZM2G070849_T01	13.7433	45.9436	1.91079	RNA.regulation of transcription.MYB domain transcription factor family	moderately similar to ( 263) AT5G49620 | Symbols: AtMYB78 | AtMYB78 (myb domain protein 78); DNA binding / transcription factor | chr5:20137491-20139384 REVERSEweakly similar to ( 164) MYBA2_ORYSA Myb-related protein MYBAS2 - Oryza sativa (Rice)moderately similar to ( 343) loc_os03g20090 12003.m101325 protein MYB transcription factor, putative, expressed seq=cds; coord=1:51397954..51400225:-1; pa…	8.47405e-28	3.90424e-26
GRMZM2G050305_T01	12.1267	25.6886	1.25037	RNA.regulation of transcription.MYB domain transcription factor family	moderately similar to ( 291) AT4G38620 | Symbols: ATMYB4, MYB4 | MYB4; DNA binding / transcription factor | chr4:18053866-18054876 FORWARDmoderately similar to ( 386) MYB1_HORVU Myb-related protein Hv1 - Hordeum vulgare (Barley)moderately similar to ( 398) loc_os09g36730 12009.m06622 protein myb-related protein Hv1, putative, expressed seq=cds; coord=2:196293689..196295310:-1; parent_gene=GRMZM2G…	6.52394e-10	6.81324e-09
GRMZM2G001824_T01	11.3394	59.0297	2.55015	RNA.regulation of transcription.MYB domain transcription factor family	moderately similar to ( 240) AT5G49620 | Symbols: AtMYB78 | AtMYB78 (myb domain protein 78); DNA binding / transcription factor | chr5:20137491-20139384 REVERSEweakly similar to ( 151) MYBA2_ORYSA Myb-related protein MYBAS2 - Oryza sativa (Rice)moderately similar to ( 259) loc_os05g04210 12005.m04954 protein cpm5, putative, expressed seq=cds; coord=10:85393574..85394991:-1; parent_gene=GRMZM2G001…	4.64215e-43	4.69674e-41
GRMZM2G006352_T01	8.20088	24.5889	1.75318	RNA.regulation of transcription.MYB domain transcription factor family	moderately similar to ( 214) AT3G49690 | Symbols: RAX3, MYB84, ATMYB84 | MYB84 (MYB DOMAIN PROTEIN 84); DNA binding / transcription factor | chr3:18427941-18429100 FORWARDweakly similar to ( 167) MYB4_ORYSA Myb-related protein Myb4 (OsMyb4) (Transcription factor RLTR1) - Oryza sativa (Rice)moderately similar to ( 309) loc_os01g49160 12001.m11104 protein myb-like DNA-binding domain containing prot…	2.29794e-13	3.52908e-12
GRMZM2G003406_T01	3.80056	11.8126	1.80451	RNA.regulation of transcription.MYB domain transcription factor family	moderately similar to ( 220) AT5G26660 | Symbols: ATMYB4, ATMYB86 | ATMYB86 (MYB DOMAIN PROTEIN 86); specific transcriptional repressor/ transcription repressor | chr5:9331775-9333044 REVERSEmoderately similar to ( 285) MYB3_HORVU Myb-related protein Hv33 - Hordeum vulgare (Barley)moderately similar to ( 405) loc_os01g50720 12001.m11253 protein myb-related protein Hv33, putative, expressed seq=cd…	1.0737e-09	1.09289e-08
GRMZM2G088783_T01	1.4225	9.55573	2.91902	RNA.regulation of transcription.MYB domain transcription factor family	moderately similar to ( 233) AT3G13890 | Symbols: MYB26 | ATMYB26 (MYB DOMAIN PROTEIN 26); DNA binding / transcription factor | chr3:4576744-4578027 REVERSEweakly similar to ( 190) MYB3_HORVU Myb-related protein Hv33 - Hordeum vulgare (Barley)moderately similar to ( 310) loc_os01g51260 12001.m11307 protein MYB9, putative, expressed seq=cds; coord=3:204151795..204153806:-1; parent_gene=GRMZM2G0887…	8.37146e-13	1.20792e-11
GRMZM5G848185_T01	0.879565	16.5792	4.40537	RNA.regulation of transcription.MYB domain transcription factor family	weakly similar to ( 136) AT5G57620 | Symbols: MYB36, AtMYB36 | MYB36 (myb domain protein 36); DNA binding / transcription factor | chr5:23334904-23336388 FORWARDvery weakly similar to (82.8) MYB4_ORYSA Myb-related protein Myb4 (OsMyb4) (Transcription factor RLTR1) - Oryza sativa (Rice)moderately similar to ( 259) loc_os02g54520 12002.m10481 protein myb-like DNA-binding domain containing protein, …	1.2629e-24	4.62954e-23
AC206901.3_FGT005	0.381777	6.43069	4.24413	RNA.regulation of transcription.MYB domain transcription factor family	moderately similar to ( 230) AT3G23250 | Symbols: MYB15, ATY19, ATMYB15 | MYB15 (MYB DOMAIN PROTEIN 15); DNA binding / transcription factor | chr3:8309742-8310624 FORWARDmoderately similar to ( 237) MYB4_ORYSA Myb-related protein Myb4 (OsMyb4) (Transcription factor RLTR1) - Oryza sativa (Rice)moderately similar to ( 237) loc_os04g43680 12004.m09327 protein myb-related protein Myb4, putative, expr…	2.93147e-08	2.47409e-07
grmzm2g152415_t01	145.953	37.1492	-1.80751	RNA.regulation of transcription.MADS box transcription factor family	moderately similar to ( 207) AT1G77980 | Symbols: AGL66 | AGL66 (AGAMOUS-LIKE 66); transcription factor | chr1:29315212-29317067 REVERSEvery weakly similar to (91.3) AGL8_SINAL Agamous-like MADS-box protein AGL8 homolog (MADS B) - Sinapis alba (White mustard) (Brassica hirta)moderately similar to ( 301) loc_os06g11970 12006.m05914 protein MADS-box protein AGL66, putative, expressed seq=cds; coord…	3.79e-35	2.62e-33
grmzm2g441115_t01	44.1006	12.3292	-1.67107	RNA.regulation of transcription.MADS box transcription factor family	weakly similar to ( 124) AT2G03060 | Symbols: AGL30 | DNA binding / transcription factor | chr2:901614-903569 FORWARDweakly similar to ( 183) loc_os11g43740 12011.m08209 protein DNA binding protein, putative, expressed seq=cds; coord=4:2887800..2890099:-1; parent_gene=GRMZM2G441115	3.92e-13	5.87e-12
grmzm2g160046_t01	33.2019	8.19133	-1.85233	RNA.regulation of transcription.MADS box transcription factor family	moderately similar to ( 251) AT3G49400 | Symbols: | transducin family protein / WD-40 repeat family protein | chr3:18319249-18324373 REVERSEmoderately similar to ( 235) loc_os01g50690 12001.m11250 protein expressed protein seq=cds; coord=5:2536181..2538192:1; parent_gene=GRMZM2G160046	1.89e-19	4.87e-18
grmzm2g402837_t01	21.639	5.57891	-1.78603	RNA.regulation of transcription.MADS box transcription factor family	very weakly similar to (82.4) MAD18_ORYSA MADS-box transcription factor 18 (OsMADS18) (MADS-box protein 2) (OsMADS2) (MADS-box protein 28) (OsMADS28) (FDRMADS7) - Oryza sativa (Rice)very weakly similar to (82.4) loc_os07g41370 12007.m29251 protein MADS-box transcription factor 18, putative, expressed seq=cds; coord=2:15000058..15001578:1; parent_gene=GRMZM2G402837	5.86e-07	4.03e-06
grmzm2g155565_t01	12.15	2.79467	-1.95161	RNA.regulation of transcription.MADS box transcription factor family	moderately similar to ( 236) AT3G49400 | Symbols: | transducin family protein / WD-40 repeat family protein | chr3:18319249-18324373 REVERSEmoderately similar to ( 408) loc_os01g50690 12001.m11250 protein expressed protein seq=cds; coord=1:293009081..293011141:-1; parent_gene=GRMZM2G155565	1.36e-10	1.55e-09
grmzm2g033093_t01	10.7077	2.59279	-1.87449	RNA.regulation of transcription.MADS box transcription factor family	very weakly similar to (96.3) AT3G57230 | Symbols: AGL16 | AGL16 (AGAMOUS-LIKE 16); transcription factor | chr3:21177710-21180671 FORWARDweakly similar to ( 151) MAD27_ORYSA MADS-box transcription factor 27 (OsMADS27) (RMADS218) - Oryza sativa (Rice)weakly similar to ( 173) loc_os04g38780 12004.m08867 protein MADS-box transcription factor 27, putative, expressed seq=cds; coord=2:41732663..4173665…	2.03e-11	2.53e-10
grmzm2g159397_t02	12.6993	1.43934	-2.97523	RNA.regulation of transcription.MADS box transcription factor family	weakly similar to ( 149) AT1G24260 | Symbols: SEP3, AGL9 | SEP3 (SEPALLATA3); DNA binding / protein binding / transcription factor | chr1:8593790-8595862 REVERSEmoderately similar to ( 278) MADS7_ORYSA MADS-box transcription factor 7 (OsMADS7) (Protein AGAMOUS-like 6) (MADS-box protein 45) (OsMADS45) (FDRMADS1) (RMADS216) - Oryza sativa (Rice)moderately similar to ( 278) loc_os08g41950 12008.m265…	3.49e-17	7.54e-16
grmzm2g148693_t01	5.59302	0.841153	-2.56277	RNA.regulation of transcription.MADS box transcription factor family	moderately similar to ( 238) AT1G69120 | Symbols: AP1, AGL7 | AP1 (APETALA1); DNA binding / protein binding / protein heterodimerization/ transcription activator/ transcription factor | chr1:25982576-25986102 REVERSEmoderately similar to ( 348) MAD15_ORYSA MADS-box transcription factor 15 (OsMADS15) (Protein APETALA1-like A) (FDRMADS3) (RMADS215) - Oryza sativa (Rice)moderately similar to ( 348) …	2.76e-07	2.01e-06
grmzm2g005155_t03	7.99302	0.495711	-3.84344	RNA.regulation of transcription.MADS box transcription factor family	weakly similar to ( 144) AT5G23260 | Symbols: TT16, ABS | TT16 (TRANSPARENT TESTA16); transcription factor | chr5:7836442-7838340 FORWARDmoderately similar to ( 274) MAD31_ORYSA MADS-box transcription factor 31 (OsMADS31) - Oryza sativa (Rice)moderately similar to ( 274) loc_os04g52410 12004.m10135 protein MADS-box transcription factor 31, putative, expressed seq=cds; coord=2:10365629..10368556:-…	7.41e-16	1.44e-14
grmzm2g105387_t01	2.76484		-32.3037	RNA.regulation of transcription.MADS box transcription factor family	weakly similar to ( 105) AT1G71692 | Symbols: AGL12, XAL1 | AGL12 (AGAMOUS-LIKE 12); transcription factor | chr1:26952903-26954939 REVERSEweakly similar to ( 118) MAD26_ORYSA MADS-box transcription factor 26 (OsMADS26) (FDRMADS3) (RMADS220) - Oryza sativa (Rice)weakly similar to ( 118) loc_os08g02070 12008.m04353 protein MADS-box transcription factor 26, putative, expressed seq=cds; coord=4:38758…	1.89e-07	1.4e-06
grmzm2g026223_t07	1.96324		-31.8091	RNA.regulation of transcription.MADS box transcription factor family	weakly similar to ( 187) AT2G45660 | Symbols: AGL20, SOC1 | AGL20 (AGAMOUS-LIKE 20); transcription factor | chr2:18807799-18810193 REVERSEmoderately similar to ( 246) MAD50_ORYSA MADS-box transcription factor 50 (OsMADS50) (Protein SUPPRESSOR OF CONSTANS OVEREXPRESSION 1-like) (OsSOC1) (Protein AGAMOUS-like 20) (RMADS208) - Oryza sativa (Rice)moderately similar to ( 209) loc_os10g39130 12010.m219…	2.54e-06	1.56e-05
GRMZM2G018589_T01	4.83383	15.0453	1.80666	RNA.regulation of transcription.MADS box transcription factor family	moderately similar to ( 255) AT4G18960 | Symbols: AG | AG (AGAMOUS); DNA binding / transcription factor | chr4:10383917-10388272 FORWARDmoderately similar to ( 310) MAD21_ORYSA MADS-box transcription factor 21 (OsMADS21) (RMADS207) - Oryza sativa (Rice)moderately similar to ( 310) loc_os01g66290 12001.m42780 protein MADS-box transcritpion factor 21, putative, expressed seq=cds; coord=3:170364983.…	9.57737e-12	1.24332e-10
GRMZM2G359952_T01	2.40897	7.30886	1.77095	RNA.regulation of transcription.MADS box transcription factor family	moderately similar to ( 281) AT4G18960 | Symbols: AG | AG (AGAMOUS); DNA binding / transcription factor | chr4:10383917-10388272 FORWARDmoderately similar to ( 367) MADS3_ORYSA MADS-box transcription factor 3 (OsMADS3) (Protein AGAMOUS-like) (RMADS222) - Oryza sativa (Rice)moderately similar to ( 399) loc_os01g10504 12001.m150506 protein MADS-box transcription factor 3, putative, expressed seq=cd…	1.37815e-06	8.85397e-06
GRMZM2G459864_T01	0.624318	15.7741	4.82906	RNA.regulation of transcription.MADS box transcription factor family	weakly similar to ( 107) AT5G60440 | Symbols: AGL62 | AGL62 (Agamous-like 62); DNA binding / transcription factor | chr5:24306329-24307520 FORWARDweakly similar to ( 139) loc_os05g23780 12005.m06672 protein DNA binding protein, putative seq=cds; coord=10:69130821..69131585:-1; parent_gene=GRMZM2G459864	1.63965e-18	4.00321e-17
grmzm2g466292_t01	8.27377	2.73751	-1.42797	RNA.regulation of transcription.JUMONJI family	weakly similar to ( 174) AT1G63490 | Symbols: | transcription factor jumonji (jmjC) domain-containing protein | chr1:23544938-23551946 REVERSEweakly similar to ( 155) loc_os05g10770 12005.m05547 protein jmjC domain containing protein, expressed seq=cds; coord=5:65425225..65434544:1; parent_gene=GRMZM2G466292	9.62e-07	6.35e-06
grmzm2g466270_t01	10.2246	2.29196	-1.98695	RNA.regulation of transcription.JUMONJI family	moderately similar to ( 378) AT1G63490 | Symbols: | transcription factor jumonji (jmjC) domain-containing protein | chr1:23544938-23551946 REVERSEmoderately similar to ( 356) loc_os06g51490 12006.m09672 protein PHD-finger family protein, expressed seq=cds; coord=5:65442955..65456381:1; parent_gene=GRMZM2G466270	1.43e-17	3.2e-16
grmzm2g042231_t01	78.3042	21.7591	-1.6815	RNA.regulation of transcription.Histone acetyltransferases	moderately similar to ( 396) AT1G32750 | Symbols: HAF01, HAF1, HAC13, GTD1, TAF1 | HAF01; DNA binding / histone acetyltransferase | chr1:11846385-11856261 REVERSEhighly similar to ( 902) loc_os06g43790 12006.m08909 protein HAF01, putative, expressed seq=cds; coord=9:93378612..93382170:1; parent_gene=GRMZM2G042231	3.2e-30	1.68e-28
grmzm2g343917_t01	38.5942	14.7746	-1.2157	RNA.regulation of transcription.Histone acetyltransferases	moderately similar to ( 292) AT1G32750 | Symbols: HAF01, HAF1, HAC13, GTD1, TAF1 | HAF01; DNA binding / histone acetyltransferase | chr1:11846385-11856261 REVERSEmoderately similar to ( 427) loc_os06g43790 12006.m08909 protein HAF01, putative, expressed seq=cds; coord=9:93368562..93373105:1; parent_gene=GRMZM2G343917	5.74e-07	3.96e-06
grmzm2g335438_t01	16.5931	6.36621	-1.21379	RNA.regulation of transcription.Histone acetyltransferases	moderately similar to ( 243) AT1G79000 | Symbols: HAC1, PCAT2, ATHPCAT2 | HAC1 (HISTONE ACETYLTRANSFERASE OF THE CBP FAMILY 1); H3/H4 histone acetyltransferase/ histone acetyltransferase/ transcription cofactor | chr1:29716933-29723984 REVERSEmoderately similar to ( 456) loc_os01g14370 12001.m08042 protein histone acetyltransferase/ protein binding protein, putative, expressed seq=cds; coord=1:16…	4.26e-10	4.55e-09
grmzm2g400092_t01	28.462	1.82905	-3.79393	RNA.regulation of transcription.Histone acetyltransferases	weakly similar to ( 150) AT5G56740 | Symbols: HAG2, HAC7, HAG02, HAC07 | HAG2 (HISTONE ACETYLTRANSFERASE OF THE GNAT FAMILY 2); H4 histone acetyltransferase/ histone acetyltransferase | chr5:22953009-22955577 REVERSEmoderately similar to ( 345) HAT1_MAIZE Histone acetyltransferase type B catalytic subunit (EC 2.3.1.48) (Histone acetyltransferase HAT B) (Histone acetyltransferase HAT-B-p50) - Zea …	9.47e-43	9.4e-41
grmzm5g842990_t01	15.6828	0.744819	-4.22698	RNA.regulation of transcription.HDA	weakly similar to ( 136) HD2C_MAIZE Histone deacetylase 2c (HD2c) (Zm-HD2c) - Zea mays (Maize)weakly similar to ( 103) loc_os05g51830 12005.m09245 protein histone deacetylase 2b, putative, expressed seq=cds; coord=1:214102311..214109032:1; parent_gene=GRMZM5G842990	1.27e-24	4.63e-23
grmzm5g842990_t02	18.9311	0.650767	-4.69268	RNA.regulation of transcription.HDA	weakly similar to ( 173) HD2A_MAIZE Histone deacetylase 2a (HD2a) (Zm-HD2a) (Nucleolar histone deacetylase HD2-p39) - Zea mays (Maize)weakly similar to ( 118) loc_os05g51830 12005.m09245 protein histone deacetylase 2b, putative, expressed seq=cds; coord=1:214104863..214108224:1; parent_gene=GRMZM5G842990	8.07e-20	2.16e-18
grmzm2g104204_t01	199.623	21.1275	-3.06642	RNA.regulation of transcription.HB,Homeobox transcription factor family	very weakly similar to (81.3) AT4G36740 | Symbols: HB-5, ATHB40 | ATHB40 (ARABIDOPSIS THALIANA HOMEOBOX PROTEIN 40); DNA binding / transcription factor | chr4:17314649-17316314 REVERSEweakly similar to ( 155) loc_os07g39320 12007.m08174 protein DNA binding protein, putative, expressed seq=cds; coord=7:160753096..160754359:1; parent_gene=GRMZM2G104204	5.92e-72	1.76e-69
grmzm2g002548_t01	42.4034	18.428	-1.0294	RNA.regulation of transcription.HB,Homeobox transcription factor family	weakly similar to ( 176) AT1G28420 | Symbols: HB-1 | HB-1 (homeobox-1); transcription factor | chr1:9979936-9987460 FORWARDhighly similar to ( 577) loc_os01g48180 12001.m11010 protein DDT domain containing protein, expressed seq=cds; coord=3:210103369..210107016:-1; parent_gene=GRMZM2G002548	2.47e-10	2.73e-09
grmzm2g122750_t01	24.4608	10.0082	-1.12199	RNA.regulation of transcription.HB,Homeobox transcription factor family	highly similar to ( 988) AT5G44180 | Symbols: | homeobox transcription factor, putative | chr5:17783172-17789872 FORWARDnearly identical (1962) loc_os05g48820 12005.m08953 protein DDT domain containing protein, expressed seq=cds; coord=6:164471036..164481803:-1; parent_gene=GRMZM2G122750	3.21e-14	5.35e-13
grmzm5g830671_t01	37.0592	8.44265	-1.96503	RNA.regulation of transcription.HB,Homeobox transcription factor family	weakly similar to ( 105) AT4G37790 | Symbols: HAT22 | HAT22; transcription factor | chr4:17768241-17769272 FORWARDweakly similar to ( 123) loc_os06g48290 12006.m09355 protein homeobox-leucine zipper protein HAT22, putative seq=cds; coord=6:88116447..88117356:1; parent_gene=GRMZM5G830671	1.01e-12	1.44e-11
grmzm2g148098_t01	26.7039	7.60944	-1.64263	RNA.regulation of transcription.HB,Homeobox transcription factor family	moderately similar to ( 340) AT4G34610 | Symbols: BLH6 | BLH6 (BELL1-LIKE HOMEODOMAIN 6); DNA binding / transcription factor | chr4:16530546-16532498 REVERSEhighly similar to ( 967) loc_os03g47740 12003.m34907 protein BEL1-related homeotic protein 30, putative, expressed seq=cds; coord=5:13661784..13666303:1; parent_gene=GRMZM2G148098	4.05e-18	9.55e-17
grmzm2g014346_t01	25.8977	5.38438	-2.09702	RNA.regulation of transcription.HB,Homeobox transcription factor family	weakly similar to ( 174) AT1G28420 | Symbols: HB-1 | HB-1 (homeobox-1); transcription factor | chr1:9979936-9987460 FORWARDhighly similar to ( 580) loc_os01g48180 12001.m11010 protein DDT domain containing protein, expressed seq=cds; coord=8:149917080..149920542:1; parent_gene=GRMZM2G014346	7.21e-23	2.36e-21
grmzm2g359237_t01	14.2507	4.73549	-1.42155	RNA.regulation of transcription.HB,Homeobox transcription factor family	very weakly similar to (96.7) AT5G44180 | Symbols: | homeobox transcription factor, putative | chr5:17783172-17789872 FORWARDmoderately similar to ( 253) loc_os01g48180 12001.m11010 protein DDT domain containing protein, expressed seq=cds; coord=8:149898495..149901914:1; parent_gene=GRMZM2G359237	6.1e-06	3.51e-05
ac196465.3_fgt006	14.1765	4.65175	-1.43862	RNA.regulation of transcription.HB,Homeobox transcription factor family	highly similar to ( 617) AT5G44180 | Symbols: | homeobox transcription factor, putative | chr5:17783172-17789872 FORWARDhighly similar to ( 873) loc_os01g48180 12001.m11010 protein DDT domain containing protein, expressed seq=cds; coord=8:149903000..149909521:1; parent_gene=AC196465.3_FG006	3.35e-09	3.22e-08
grmzm2g062244_t01	50.7085	3.4052	-3.72607	RNA.regulation of transcription.HB,Homeobox transcription factor family	weakly similar to ( 129) AT4G36740 | Symbols: HB-5, ATHB40 | ATHB40 (ARABIDOPSIS THALIANA HOMEOBOX PROTEIN 40); DNA binding / transcription factor | chr4:17314649-17316314 REVERSEmoderately similar to ( 230) loc_os07g39320 12007.m08174 protein DNA binding protein, putative, expressed seq=cds; coord=2:207612930..207613968:1; parent_gene=GRMZM2G062244	1.17e-29	6.01e-28
grmzm2g005624_t01	7.42463	2.23323	-1.56285	RNA.regulation of transcription.HB,Homeobox transcription factor family	weakly similar to ( 117) AT4G36740 | Symbols: HB-5, ATHB40 | ATHB40 (ARABIDOPSIS THALIANA HOMEOBOX PROTEIN 40); DNA binding / transcription factor | chr4:17314649-17316314 REVERSEmoderately similar to ( 252) loc_os03g10210 12003.m06474 protein DNA binding protein, putative, expressed seq=cds; coord=1:23241091..23244476:1; parent_gene=GRMZM2G005624	9.51e-07	6.28e-06
grmzm2g386276_t01	8.69984	0.92567	-3.06323	RNA.regulation of transcription.HB,Homeobox transcription factor family	moderately similar to ( 276) AT4G04890 | Symbols: PDF2 | PDF2 (PROTODERMAL FACTOR 2); DNA binding / transcription factor | chr4:2476970-2480090 REVERSEmoderately similar to ( 475) loc_os01g57890 12001.m42734 protein ATML1, putative, expressed seq=cds; coord=3:189691026..189696088:-1; parent_gene=GRMZM2G386276	1.09e-18	2.69e-17
grmzm2g109987_t01	3.05016	0.662601	-2.03528	RNA.regulation of transcription.HB,Homeobox transcription factor family	nearly identical (1001) AT5G60690 | Symbols: REV, IFL, IFL1 | REV (REVOLUTA); DNA binding / lipid binding / transcription factor | chr5:24397734-24401933 FORWARDnearly identical (1296) loc_os03g01890 12003.m34764 protein rolled leaf1, putative, expressed seq=cds; coord=9:154642336..154650601:-1; parent_gene=GRMZM2G109987	6.5e-07	4.44e-06
AC233899.1_FGT004	18.9525	37.8356	1.16336	RNA.regulation of transcription.HB,Homeobox transcription factor family	very weakly similar to (89.0) AT4G40060 | Symbols: ATHB16, ATHB-16 | ATHB16 (ARABIDOPSIS THALIANA HOMEOBOX PROTEIN 16); sequence-specific DNA binding / transcription activator/ transcription factor | chr4:18571682-18572774 REVERSEweakly similar to ( 107) loc_os03g08960 12003.m06402 protein homeodomain-leucine zipper transcription factor TaHDZipI-1, putative, expressed seq=cds; coord=9:149646070..…	1.90967e-09	1.8898e-08
GRMZM2G122897_T01	7.91853	23.3182	1.72733	RNA.regulation of transcription.HB,Homeobox transcription factor family	highly similar to ( 729) AT4G21750 | Symbols: ATML1 | ATML1 (MERISTEM LAYER 1); DNA binding / sequence-specific DNA binding / transcription factor | chr4:11556965-11560243 FORWARDhighly similar to ( 850) loc_os04g53540 12004.m101662 protein homeobox protein GLABRA2, putative, expressed seq=cds; coord=10:143385947..143390709:-1; parent_gene=GRMZM2G122897	7.75705e-22	2.3526e-20
GRMZM2G119999_T01	2.53296	11.2871	2.32445	RNA.regulation of transcription.HB,Homeobox transcription factor family	weakly similar to ( 118) AT5G65310 | Symbols: ATHB5, ATHB-5 | ATHB5 (ARABIDOPSIS THALIANA HOMEOBOX PROTEIN 5); protein homodimerization/ sequence-specific DNA binding / transcription activator/ transcription factor | chr5:26102457-26103854 REVERSEmoderately similar to ( 236) loc_os10g23090 12010.m05314 protein homeodomain-leucine zipper transcription factor TaHDZipI-1, putative, expressed seq=cds…	4.47285e-14	7.33699e-13
GRMZM2G178102_T01	0.04836	2.15282	5.64552	RNA.regulation of transcription.HB,Homeobox transcription factor family	nearly identical (1162) AT2G34710 | Symbols: PHB, ATHB14, ATHB-14, PHB-1D | PHB (PHABULOSA); DNA binding / transcription factor | chr2:14639548-14643993 REVERSEnearly identical (1449) loc_os12g41860 12012.m07967 protein class III HD-Zip protein 4, putative, expressed seq=cds; coord=3:123263423..123270240:-1; parent_gene=GRMZM2G178102	6.11712e-11	7.22683e-10
GRMZM2G047448_T01		4.8275	32.7389	RNA.regulation of transcription.HB,Homeobox transcription factor family	weakly similar to ( 121) AT2G17950 | Symbols: WUS, PGA6, WUS1 | WUS (WUSCHEL); DNA binding / protein binding / transcription factor/ transcription regulator | chr2:7809100-7810671 REVERSEweakly similar to ( 122) WUS_ANTMA Protein WUSCHEL (Protein ROSULATA) - Antirrhinum majus (Garden snapdragon)weakly similar to ( 186) loc_os04g56780 12004.m10565 protein protein WUSCHEL, putative, expressed seq=c…	2.66663e-10	2.92751e-09
GRMZM2G109869_T01	21.3588	40.2297	1.0799	RNA.regulation of transcription.GRAS transcription factor family	moderately similar to ( 232) AT5G52510 | Symbols: | scarecrow-like transcription factor 8 (SCL8) | chr5:21307196-21309118 FORWARDweakly similar to ( 172) CIGR2_ORYSA Chitin-inducible gibberellin-responsive protein 2 - Oryza sativa (Rice)highly similar to ( 545) loc_os04g49110 12004.m09846 protein chitin-inducible gibberellin-responsive protein 2, putative, expressed seq=cds; coord=2:15340482..153…	3.2221e-12	4.36762e-11
GRMZM2G028438_T01	19.0677	34.2432	1.01133	RNA.regulation of transcription.GRAS transcription factor family	weakly similar to ( 200) AT5G52510 | Symbols: | scarecrow-like transcription factor 8 (SCL8) | chr5:21307196-21309118 FORWARDweakly similar to ( 139) CIGR2_ORYSA Chitin-inducible gibberellin-responsive protein 2 - Oryza sativa (Rice)highly similar to ( 508) loc_os02g45760 12002.m09613 protein chitin-inducible gibberellin-responsive protein 2, putative, expressed seq=cds; coord=4:156022485..156024…	3.35864e-10	3.6336e-09
GRMZM2G173429_T01	10.4417	22.697	1.29152	RNA.regulation of transcription.GRAS transcription factor family	moderately similar to ( 255) AT5G52510 | Symbols: | scarecrow-like transcription factor 8 (SCL8) | chr5:21307196-21309118 FORWARDweakly similar to ( 182) CIGR2_ORYSA Chitin-inducible gibberellin-responsive protein 2 - Oryza sativa (Rice)highly similar to ( 647) loc_os04g49110 12004.m09846 protein chitin-inducible gibberellin-responsive protein 2, putative, expressed seq=cds; coord=10:135800706..1…	2.91702e-12	3.97325e-11
GRMZM2G159475_T01	4.61286	9.92053	1.27268	RNA.regulation of transcription.GRAS transcription factor family	moderately similar to ( 446) AT2G37650 | Symbols: | scarecrow-like transcription factor 9 (SCL9) | chr2:15792623-15794779 FORWARDmoderately similar to ( 207) CIGR1_ORYSA Chitin-inducible gibberellin-responsive protein 1 - Oryza sativa (Rice)highly similar to ( 772) loc_os12g38490 12012.m07635 protein chitin-inducible gibberellin-responsive protein 1, putative, expressed seq=cds; coord=3:125713562…	2.72924e-08	2.31656e-07
GRMZM2G163427_T01	1.6419	5.09058	1.80168	RNA.regulation of transcription.GRAS transcription factor family	moderately similar to ( 439) AT2G37650 | Symbols: | scarecrow-like transcription factor 9 (SCL9) | chr2:15792623-15794779 FORWARDweakly similar to ( 199) CIGR2_ORYSA Chitin-inducible gibberellin-responsive protein 2 - Oryza sativa (Rice)highly similar to ( 771) loc_os11g47870 12011.m08584 protein chitin-inducible gibberellin-responsive protein 2, putative, expressed seq=cds; coord=4:843149..84566…	1.31825e-07	1.00737e-06
grmzm2g006707_t01	30.9123	10.7876	-1.35464	RNA.regulation of transcription.Global transcription factor group	moderately similar to ( 241) AT5G63320 | Symbols: | FUNCTIONS IN: molecular_function unknown; INVOLVED IN: biological_process unknown; LOCATED IN: cellular_component unknown; EXPRESSED IN: 24 plant structures; EXPRESSED DURING: 14 growth stages; CONTAINS InterPro DOMAIN/s: Bromodomain (InterPro:IPR001487); BEST Arabidopsis thaliana protein match is: ATBET9 (Arabidopsis thaliana Bromodomain and Ex…	3.81e-16	7.65e-15
grmzm2g127299_t01	15.1244	5.5677	-1.27358	RNA.regulation of transcription.Global transcription factor group	moderately similar to ( 266) AT3G27260 | Symbols: GTE8 | GTE8; DNA binding | chr3:10068411-10072403 FORWARDmoderately similar to ( 340) loc_os08g03360 12008.m04479 protein DNA binding protein, putative, expressed seq=cds; coord=6:7132205..7137741:-1; parent_gene=GRMZM2G127299	1.18e-09	1.2e-08
grmzm2g103166_t02	2.22605		-32.2072	RNA.regulation of transcription.Global transcription factor group	weakly similar to ( 196) AT2G34900 | Symbols: GTE01, IMB1, GTE1 | IMB1 (IMBIBITION-INDUCIBLE 1); DNA binding | chr2:14723333-14725562 REVERSEmoderately similar to ( 326) loc_os06g04640 12006.m32221 protein transcription factor GTE6, putative, expressed seq=cds; coord=6:68994346..68998440:1; parent_gene=GRMZM2G103166	4.84e-08	3.97e-07
grmzm2g075582_t01	40.7447	11.6873	-1.63359	RNA.regulation of transcription.General Transcription	moderately similar to ( 345) AT5G41580 | Symbols: | zinc ion binding | chr5:16626563-16630659 REVERSEhighly similar to ( 859) loc_os06g06870 12006.m05411 protein zinc ion binding protein, putative, expressed seq=cds; coord=9:16654134..16675731:1; parent_gene=GRMZM2G075582	4.62e-24	1.63e-22
grmzm2g019257_t01	28.2845	9.13959	-1.46144	RNA.regulation of transcription.General Transcription	weakly similar to ( 130) loc_os03g62379 12003.m11114 protein DNA binding protein, putative, expressed seq=cds; coord=6:6015317..6016569:1; parent_gene=GRMZM2G019257	9.32e-09	8.45e-08
grmzm2g119359_t01	20.5745	7.81133	-1.22985	RNA.regulation of transcription.General Transcription	moderately similar to ( 260) loc_os06g02560 12006.m04989 protein growth-regulating factor, putative, expressed seq=cds; coord=9:25709471..25712485:1; parent_gene=GRMZM2G119359	2.48e-08	2.12e-07
GRMZM2G178261_T01	3.91742	16.9213	2.27782	RNA.regulation of transcription.General Transcription	weakly similar to ( 185) AT2G22840 | Symbols: AtGRF1 | AtGRF1 (GROWTH-REGULATING FACTOR 1); transcription activator | chr2:9728841-9731141 FORWARDhighly similar to ( 590) loc_os03g51970 12003.m10176 protein growth-regulating factor 1, putative, expressed seq=cds; coord=1:272348922..272353057:1; parent_gene=GRMZM2G178261	5.60433e-24	1.95795e-22
GRMZM2G030458_T01	22.1311	45.5236	1.20981	RNA.regulation of transcription.GeBP like	weakly similar to ( 112) AT3G04930 | Symbols: | transcription regulator | chr3:1363029-1364399 FORWARDmoderately similar to ( 325) loc_os03g25430 12003.m07890 protein expressed protein seq=cds; coord=9:127352979..127354539:1; parent_gene=GRMZM2G030458	4.62007e-13	6.85604e-12
ac233960.1_fgt003	37.3365	8.89305	-1.89743	RNA.regulation of transcription.G2-like transcription factor family, GARP	weakly similar to ( 195) AT5G45580 | Symbols: | transcription factor | chr5:18481092-18482598 REVERSEmoderately similar to ( 397) loc_os02g47190 12002.m09754 protein calcium-dependent protein kinase substrate protein, putative, expressed seq=cds; coord=5:199978948..199981420:1; parent_gene=AC233960.1_FG003	2.08e-13	3.21e-12
grmzm2g069525_t01	20.8645	4.11352	-2.17476	RNA.regulation of transcription.G2-like transcription factor family, GARP	weakly similar to ( 102) AT1G14600 | Symbols: | DNA binding / transcription factor | chr1:5001185-5003370 REVERSEmoderately similar to ( 256) loc_os04g47890 12004.m09729 protein myb-like DNA-binding domain, SHAQKYF class family protein, expressed seq=cds; coord=2:16870336..16874086:-1; parent_gene=GRMZM2G069525	1.62e-18	3.97e-17
grmzm2g010920_t01	7.59096	0.921683	-2.87428	RNA.regulation of transcription.G2-like transcription factor family, GARP	moderately similar to ( 236) AT3G13040 | Symbols: | myb family transcription factor | chr3:4172415-4174456 REVERSEmoderately similar to ( 347) loc_os02g04640 12002.m05813 protein transfactor-like protein, putative, expressed seq=cds; coord=5:77748895..77751969:-1; parent_gene=GRMZM2G010920	9.35e-14	1.48e-12
grmzm2g002894_t01	1.30726		-31.8725	RNA.regulation of transcription.FHA transcription factor	very weakly similar to (91.3) loc_os07g09320 12007.m05388 protein expressed protein seq=cds; coord=7:14322666..14337584:-1; parent_gene=GRMZM2G002894	2.54e-06	1.56e-05
grmzm2g045275_t01	59.5047	25.7483	-1.04258	RNA.regulation of transcription.ELF3	weakly similar to ( 180) AT2G25930 | Symbols: ELF3, PYK20 | ELF3 (EARLY FLOWERING 3); protein C-terminus binding / transcription factor | chr2:11059459-11063178 FORWARDhighly similar to ( 706) loc_os01g38530 12001.m10136 protein early flowering 3, putative, expressed seq=cds; coord=3:218897671..218903527:-1; parent_gene=GRMZM2G045275	1.09e-13	1.72e-12
GRMZM2G151811_T01	2.19696	10.9507	2.4866	RNA.regulation of transcription.EIN3-like(EIL) transcription factor family	moderately similar to ( 311) AT3G20770 | Symbols: EIN3 | EIN3 (ETHYLENE-INSENSITIVE3); transcription factor | chr3:7260702-7262588 REVERSEmoderately similar to ( 433) loc_os07g48630 12007.m29024 protein ETHYLENE-INSENSITIVE3-like 1 protein, putative, expressed seq=cds; coord=7:173951359..173953387:-1; parent_gene=GRMZM2G151811	7.58512e-17	1.60149e-15
grmzm2g139024_t01	25.6522	10.6939	-1.0943	RNA.regulation of transcription.E2F/DP transcription factor family	moderately similar to ( 334) AT5G03415 | Symbols: DPB, ATDPB | DPB; protein binding / protein heterodimerization | chr5:842842-845200 FORWARDmoderately similar to ( 405) loc_os10g30420 12010.m05904 protein transcription factor Dp-1, putative, expressed seq=cds; coord=5:32424803..32462467:1; parent_gene=GRMZM2G139024	3.19e-07	2.3e-06
grmzm2g041701_t01	9.23905	3.15228	-1.37975	RNA.regulation of transcription.E2F/DP transcription factor family	moderately similar to ( 363) AT2G36010 | Symbols: E2F3, ATE2FA | E2F3 (E2F TRANSCRIPTION FACTOR 3); DNA binding / transcription factor | chr2:15119688-15122893 FORWARDhighly similar to ( 645) loc_os02g33430 12002.m100042 protein transcription factor E2F3, putative, expressed seq=cds; coord=4:109523517..109528342:-1; parent_gene=GRMZM2G041701	5.92e-07	4.07e-06
GRMZM2G025592_T01	7.85766	15.9912	1.19273	RNA.regulation of transcription.DNA methyltransferases	highly similar to ( 749) AT1G69770 | Symbols: CMT3 | CMT3 (chromomethylase 3); DNA (cytosine-5-)-methyltransferase | chr1:26248496-26253519 REVERSEnearly identical (1647) CMT1_MAIZE DNA (cytosine-5)-methyltransferase 1 (EC 2.1.1.37) (Chromomethylase 1) (Zea methyltransferase2) (Zmet2) (DNA cytosine methyltransferase MET2a) - Zea mays (Maize)nearly identical (1062) loc_os03g12570 12003.m06707 prot…	7.98652e-12	1.04452e-10
grmzm2g409865_t01	120.956	48.8443	-1.13938	RNA.regulation of transcription.Chromatin Remodeling Factors	moderately similar to ( 387) AT2G25170 | Symbols: PKL, GYM, CHD3, CHR6, SSL2 | PKL (PICKLE); ATPase/ DNA binding / DNA helicase | chr2:10714411-10723763 FORWARDhighly similar to ( 695) loc_os06g08480 12006.m05567 protein CHD3-type chromatin remodeling factor PICKLE, putative, expressed seq=cds; coord=9:13435200..13446764:1; parent_gene=GRMZM2G409865	2.85e-17	6.22e-16
grmzm2g574858_t01	39.6463	17.4178	-1.01599	RNA.regulation of transcription.Chromatin Remodeling Factors	highly similar to ( 705) AT2G16390 | Symbols: DRD1, CHR35, DMS1 | DRD1 (DEFECTIVE IN RNA-DIRECTED DNA METHYLATION 1); ATP binding / DNA binding / helicase/ nucleic acid binding | chr2:7097638-7101096 FORWARDvery weakly similar to (93.2) ISW2_ORYSA Probable chromatin remodelling complex ATPase chain (EC 3.6.1.-) (ISW2-like) (Sucrose nonfermenting protein 2 homolog) - Oryza sativa (Rice)nearly iden…	3.91e-12	5.25e-11
grmzm2g010342_t01	49.5468	16.8907	-1.38598	RNA.regulation of transcription.Chromatin Remodeling Factors	nearly identical (1337) AT2G13370 | Symbols: CHR5 | CHR5 (chromatin remodeling 5); ATP binding / DNA binding / chromatin binding / helicase/ nucleic acid binding | chr2:5544601-5555543 REVERSEmoderately similar to ( 368) ISW2_ORYSA Probable chromatin remodelling complex ATPase chain (EC 3.6.1.-) (ISW2-like) (Sucrose nonfermenting protein 2 homolog) - Oryza sativa (Rice)nearly identical (1426) loc…	6.94e-24	2.41e-22
grmzm2g472428_t02	34.651	14.3142	-1.10915	RNA.regulation of transcription.Chromatin Remodeling Factors	moderately similar to ( 329) AT1G08060 | Symbols: MOM | MOM (MORPHEUS MOLECULE) | chr1:2501981-2510488 REVERSEweakly similar to ( 140) ISW2_ORYSA Probable chromatin remodelling complex ATPase chain (EC 3.6.1.-) (ISW2-like) (Sucrose nonfermenting protein 2 homolog) - Oryza sativa (Rice)nearly identical (2093) loc_os06g01320 12006.m04873 protein SNF2 family N-terminal domain containing protein, exp…	5.51e-16	1.09e-14
grmzm5g817934_t01	26.025	8.63777	-1.42112	RNA.regulation of transcription.Chromatin Remodeling Factors	very weakly similar to (84.0) AT3G19080 | Symbols: | SWIB complex BAF60b domain-containing protein | chr3:6596082-6598667 FORWARDweakly similar to ( 112) loc_os03g55570 12003.m10470 protein SWIB/MDM2 domain containing protein, expressed seq=cds; coord=1:280205429..280209358:1; parent_gene=GRMZM5G817934	1.52e-07	1.15e-06
grmzm2g049766_t01	34.6854	8.26941	-1.90177	RNA.regulation of transcription.Chromatin Remodeling Factors	weakly similar to ( 175) loc_os10g31970 12010.m06046 protein ATP binding protein, putative, expressed seq=cds; coord=1:235135689..235137414:-1; parent_gene=GRMZM2G049766	1.12e-14	1.95e-13
grmzm2g141258_t01	25.9904	7.36702	-1.65319	RNA.regulation of transcription.Chromatin Remodeling Factors	highly similar to ( 771) AT2G13370 | Symbols: CHR5 | CHR5 (chromatin remodeling 5); ATP binding / DNA binding / chromatin binding / helicase/ nucleic acid binding | chr2:5544601-5555543 REVERSEmoderately similar to ( 247) ISW2_ORYSA Probable chromatin remodelling complex ATPase chain (EC 3.6.1.-) (ISW2-like) (Sucrose nonfermenting protein 2 homolog) - Oryza sativa (Rice)nearly identical (1256) lo…	2.38e-27	1.05e-25
grmzm2g313553_t01	61.2271	7.18366	-2.92586	RNA.regulation of transcription.Chromatin Remodeling Factors	highly similar to ( 521) AT5G07810 | Symbols: | SNF2 domain-containing protein / helicase domain-containing protein / HNH endonuclease domain-containing protein | chr5:2491412-2498484 REVERSEhighly similar to ( 875) loc_os07g40730 12007.m079739 protein ATP binding protein, putative, expressed seq=cds; coord=7:163214920..163233302:1; parent_gene=GRMZM2G313553	2.16e-66	5.26e-64
grmzm2g163436_t01	25.0814	6.98829	-1.67392	RNA.regulation of transcription.Chromatin Remodeling Factors	moderately similar to ( 210) AT1G08600 | Symbols: ATRX, CHR20 | ATRX; ATP binding / DNA binding / helicase/ nucleic acid binding | chr1:2724562-2733431 FORWARDmoderately similar to ( 279) loc_os10g31970 12010.m06046 protein ATP binding protein, putative, expressed seq=cds; coord=1:235145597..235146735:-1; parent_gene=GRMZM2G163436	6.67e-07	4.54e-06
grmzm2g439281_t01	28.8509	4.80947	-2.41711	RNA.regulation of transcription.Chromatin Remodeling Factors	weakly similar to ( 119) AT5G07810 | Symbols: | SNF2 domain-containing protein / helicase domain-containing protein / HNH endonuclease domain-containing protein | chr5:2491412-2498484 REVERSEmoderately similar to ( 230) loc_os07g40730 12007.m079739 protein ATP binding protein, putative, expressed seq=cds; coord=7:163209765..163211110:1; parent_gene=GRMZM2G439281	6.13e-16	1.2e-14
grmzm2g130739_t01	12.6949	3.50886	-1.68703	RNA.regulation of transcription.Chromatin Remodeling Factors	very weakly similar to (87.0) loc_os10g31970 12010.m06046 protein ATP binding protein, putative, expressed seq=cds; coord=1:235195784..235198809:-1; parent_gene=GRMZM2G130739	8.11e-06	4.57e-05
grmzm2g381386_t01	8.7076	1.9767	-1.9725	RNA.regulation of transcription.Chromatin Remodeling Factors	moderately similar to ( 427) AT2G40770 | Symbols: | ATP binding / DNA binding / helicase/ nucleic acid binding / protein binding / zinc ion binding | chr2:17013535-17021315 REVERSEmoderately similar to ( 271) loc_os07g48270 12007.m09041 protein ATP-dependent helicase C582.10c in chromosome II, putative, expressed seq=cds; coord=7:173225215..173228778:-1; parent_gene=GRMZM2G381386	4.41e-09	4.17e-08
grmzm2g381386_t02	7.14153	1.2558	-2.33781	RNA.regulation of transcription.Chromatin Remodeling Factors	highly similar to ( 509) AT2G40770 | Symbols: | ATP binding / DNA binding / helicase/ nucleic acid binding / protein binding / zinc ion binding | chr2:17013535-17021315 REVERSEmoderately similar to ( 271) loc_os07g48270 12007.m09041 protein ATP-dependent helicase C582.10c in chromosome II, putative, expressed seq=cds; coord=7:173225630..173233378:-1; parent_gene=GRMZM2G381386	1.39e-12	1.97e-11
grmzm2g163849_t03	1.77305	0.449103	-1.80974	RNA.regulation of transcription.Chromatin Remodeling Factors	nearly identical (1834) AT2G46020 | Symbols: CHR2, ATBRM, BRM, CHA2 | transcription regulatory protein SNF2, putative | chr2:18923304-18931769 FORWARDmoderately similar to ( 352) ISW2_ORYSA Probable chromatin remodelling complex ATPase chain (EC 3.6.1.-) (ISW2-like) (Sucrose nonfermenting protein 2 homolog) - Oryza sativa (Rice)nearly identical (2739) loc_os02g02290 12002.m05579 protein SNF2 fami…	1.95e-06	1.23e-05
GRMZM2G030768_T01	4.73235	11.8741	1.49606	RNA.regulation of transcription.Chromatin Remodeling Factors	highly similar to ( 998) AT5G43530 | Symbols: | SNF2 domain-containing protein / helicase domain-containing protein / RING finger domain-containing protein | chr5:17489327-17494830 FORWARDweakly similar to ( 115) ISW2_ORYSA Probable chromatin remodelling complex ATPase chain (EC 3.6.1.-) (ISW2-like) (Sucrose nonfermenting protein 2 homolog) - Oryza sativa (Rice)nearly identical (1451) loc_os04g09…	2.04418e-14	3.46783e-13
GRMZM2G178435_T01	3.65018	15.005	2.20672	RNA.regulation of transcription.Chromatin Remodeling Factors	moderately similar to ( 463) AT3G24340 | Symbols: chr40 | chr40 (chromatin remodeling 40); ATP binding / DNA binding / helicase/ nucleic acid binding | chr3:8832085-8835722 REVERSEweakly similar to ( 103) ISW2_ORYSA Probable chromatin remodelling complex ATPase chain (EC 3.6.1.-) (ISW2-like) (Sucrose nonfermenting protein 2 homolog) - Oryza sativa (Rice)highly similar to ( 883) loc_os02g43460 120…	1.02133e-29	5.28295e-28
GRMZM2G409128_T01	3.21471	12.6582	2.14778	RNA.regulation of transcription.Chromatin Remodeling Factors	moderately similar to ( 448) AT5G01710 | Symbols: | LOCATED IN: endomembrane system; EXPRESSED IN: sperm cell, male gametophyte, pollen tube; EXPRESSED DURING: L mature pollen stage, M germinated pollen stage; CONTAINS InterPro DOMAIN/s: Methyltransferase FkbM (InterPro:IPR006342); BEST Arabidopsis thaliana protein match is: methyltransferase (TAIR:AT4G24805.1); Has 224 Blast hits to 223 proteins…	1.03613e-16	2.15702e-15
grmzm2g440949_t01	84.2784	36.9578	-1.02356	RNA.regulation of transcription.CCAAT box binding factor family, HAP5	weakly similar to ( 165) AT3G12480 | Symbols: NF-YC11 | NF-YC11 (NUCLEAR FACTOR Y, SUBUNIT C11); DNA binding / transcription factor | chr3:3958065-3960278 FORWARDmoderately similar to ( 286) loc_os05g41450 12005.m08320 protein dr1-associated corepressor, putative, expressed seq=cds; coord=6:155661607..155667746:1; parent_gene=GRMZM2G440949	4.74e-13	7e-12
grmzm2g091433_t02	7.96352	1.49968	-2.23969	RNA.regulation of transcription.CCAAT box binding factor family, HAP5	weakly similar to ( 173) loc_os11g34200 12011.m28822 protein repressor protein, putative, expressed seq=cds; coord=4:190868585..190874317:1; parent_gene=GRMZM2G091433	3.89e-11	4.7e-10
GRMZM2G078691_T01	87.84	164.827	1.07407	RNA.regulation of transcription.CCAAT box binding factor family, HAP5	weakly similar to ( 171) AT1G56170 | Symbols: HAP5B, ATHAP5B, NF-YC2 | NF-YC2 (NUCLEAR FACTOR Y, SUBUNIT C2); DNA binding / transcription activator/ transcription factor | chr1:21025118-21025717 FORWARDmoderately similar to ( 210) loc_os09g30310 12009.m06182 protein nuclear transcription factor Y subunit C-2, putative, expressed seq=cds; coord=7:131185760..131186899:1; parent_gene=GRMZM2G078691	3.08964e-15	5.64663e-14
GRMZM2G113127_T01	22.778	53.0426	1.3843	RNA.regulation of transcription.CCAAT box binding factor family, HAP5	weakly similar to ( 174) AT1G08970 | Symbols: HAP5C, NF-YC9 | NF-YC9 (NUCLEAR FACTOR Y, SUBUNIT C9); DNA binding / transcription factor | chr1:2883144-2883839 FORWARDmoderately similar to ( 236) loc_os08g38780 12008.m07861 protein nuclear transcription factor Y subunit C-2, putative, expressed seq=cds; coord=1:183775356..183776862:1; parent_gene=GRMZM2G113127	9.44102e-16	1.81874e-14
GRMZM2G022162_T01	1.56219	13.3277	3.26045	RNA.regulation of transcription.CCAAT box binding factor family, HAP5	weakly similar to ( 130) AT1G56170 | Symbols: HAP5B, ATHAP5B, NF-YC2 | NF-YC2 (NUCLEAR FACTOR Y, SUBUNIT C2); DNA binding / transcription activator/ transcription factor | chr1:21025118-21025717 FORWARDweakly similar to ( 141) loc_os09g30310 12009.m06182 protein nuclear transcription factor Y subunit C-2, putative, expressed seq=cds; coord=2:189204687..189208176:-1; parent_gene=GRMZM2G022162	4.46671e-16	8.91016e-15
grmzm2g038303_t01	7.13768	1.12013	-2.50378	RNA.regulation of transcription.CCAAT box binding factor family, HAP2	weakly similar to ( 132) AT1G72830 | Symbols: HAP2C, ATHAP2C, NF-YA3 | NF-YA3 (NUCLEAR FACTOR Y, SUBUNIT A3); transcription factor | chr1:27405699-27407088 REVERSEmoderately similar to ( 281) loc_os07g41720 12007.m29255 protein nuclear transcription factor Y subunit A-3, putative, expressed seq=cds; coord=7:164991494..164995805:-1; parent_gene=GRMZM2G038303	2.53e-08	2.15e-07
grmzm2g483975_t01	16.6833	3.84366	-1.95043	RNA.regulation of transcription.C3H zinc finger family	weakly similar to ( 101) loc_os12g27780 12012.m06594 protein transposon protein, putative, CACTA, En/Spm sub-class seq=cds; coord=6:88717047..88722617:-1; parent_gene=GRMZM2G483975	4.16e-08	3.44e-07
grmzm2g107491_t01	6.72681	1.15619	-2.37349	RNA.regulation of transcription.C3H zinc finger family	moderately similar to ( 452) AT3G02830 | Symbols: ZFN1 | ZFN1 (ZINC FINGER PROTEIN 1); DNA binding / nuclease/ nucleic acid binding | chr3:614075-615916 FORWARDhighly similar to ( 711) ZFNL2_ORYSA Zinc finger CCCH domain-containing protein ZFN-like 2 - Oryza sativa (Rice)highly similar to ( 711) loc_os01g68860 12001.m43436 protein zinc finger CCCH type domain-containing protein ZFN-like 2, putati…	4.28e-09	4.06e-08
grmzm2g475017_t03	1.54738		-32.0484	RNA.regulation of transcription.C3H zinc finger family	weakly similar to ( 189) AT5G18550 | Symbols: | nucleic acid binding / zinc ion binding | chr5:6160515-6162729 FORWARDmoderately similar to ( 288) ZFNL3_ORYSA Zinc finger CCCH domain-containing protein ZFN-like 3 - Oryza sativa (Rice)moderately similar to ( 288) loc_os01g15350 12001.m08133 protein zinc finger CCCH type domain-containing protein ZFN-like 3, putative, expressed seq=cds; coord=8:495…	3.49e-07	2.49e-06
GRMZM2G117007_T01	660.804	1455.51	1.3095	RNA.regulation of transcription.C3H zinc finger family	moderately similar to ( 256) AT3G55980 | Symbols: SZF1, ATSZF1 | SZF1 (SALT-INDUCIBLE ZINC FINGER 1); transcription factor | chr3:20776857-20778599 FORWARDhighly similar to ( 516) loc_os05g03760 12005.m27532 protein zinc finger transcription factor-like protein, putative, expressed seq=cds; coord=8:131041707..131043172:-1; parent_gene=GRMZM2G117007	8.71055e-29	4.29483e-27
GRMZM5G853245_T03	18.7197	96.4248	2.53209	RNA.regulation of transcription.C3H zinc finger family	moderately similar to ( 245) AT4G29190 | Symbols: | zinc finger (CCCH-type) family protein | chr4:14392233-14393303 REVERSEmoderately similar to ( 467) loc_os01g09620 12001.m42903 protein nucleic acid binding protein, putative, expressed seq=cds; coord=3:6681782..6683686:1; parent_gene=GRMZM5G853245	1.0467e-60	2.00571e-58
GRMZM2G400714_T01	311.637	650.377	1.22763	RNA.regulation of transcription.C2H2 zinc finger family	weakly similar to ( 135) ZFP1_WHEAT Zinc-finger protein 1 (WZF1) - Triticum aestivum (Wheat)moderately similar to ( 221) loc_os03g55540 12003.m10467 protein zinc-finger protein 1, putative, expressed seq=cds; coord=1:279912701..279914465:-1; parent_gene=GRMZM2G400714	6.11616e-25	2.30212e-23
GRMZM2G361210_T01	278.359	1062.96	2.10258	RNA.regulation of transcription.C2H2 zinc finger family	weakly similar to ( 131) loc_os03g60570 12003.m10946 protein zinc finger DNA-binding protein, putative, expressed seq=cds; coord=1:293158302..293159120:1; parent_gene=GRMZM2G361210	1.07063e-64	2.4179e-62
GRMZM2G061626_T01	192.831	475.701	1.47715	RNA.regulation of transcription.C2H2 zinc finger family	weakly similar to ( 152) loc_os03g60560 12003.m10945 protein ZFP16-2, putative, expressed seq=cds; coord=1:293154769..293155800:1; parent_gene=GRMZM2G061626	2.16754e-32	1.26912e-30
GRMZM2G002815_T01	103.099	257.857	1.48978	RNA.regulation of transcription.C2H2 zinc finger family	weakly similar to ( 119) loc_os03g60570 12003.m10946 protein zinc finger DNA-binding protein, putative, expressed seq=cds; coord=5:2365726..2366372:-1; parent_gene=GRMZM2G002815	1.97028e-25	7.56242e-24
GRMZM2G035103_T01	51.7099	126.389	1.45856	RNA.regulation of transcription.C2H2 zinc finger family	very weakly similar to (83.6) AT1G27730 | Symbols: STZ, ZAT10 | STZ (salt tolerance zinc finger); nucleic acid binding / transcription factor/ transcription repressor/ zinc ion binding | chr1:9648302-9648985 REVERSEweakly similar to ( 145) ZFP1_WHEAT Zinc-finger protein 1 (WZF1) - Triticum aestivum (Wheat)weakly similar to ( 143) loc_os03g55540 12003.m10467 protein zinc-finger protein 1, putative…	8.55718e-26	3.36095e-24
GRMZM2G002805_T01	25.7171	55.9894	1.29426	RNA.regulation of transcription.C2H2 zinc finger family	weakly similar to ( 129) loc_os03g60560 12003.m10945 protein ZFP16-2, putative, expressed seq=cds; coord=5:2378330..2379629:-1; parent_gene=GRMZM2G002805	1.36943e-14	2.35795e-13
GRMZM2G011357_T01	3.1365	88.3955	4.98332	RNA.regulation of transcription.C2H2 zinc finger family	moderately similar to ( 275) AT1G55110 | Symbols: AtIDD7 | AtIDD7 (Arabidopsis thaliana Indeterminate(ID)-Domain 7); nucleic acid binding / transcription factor/ zinc ion binding | chr1:20560406-20562625 REVERSEmoderately similar to ( 302) loc_os10g28330 12010.m05713 protein zinc finger protein ID1, putative, expressed seq=cds; coord=1:239608944..239612267:-1; parent_gene=GRMZM2G011357	1.30832e-119	1.22565e-116
GRMZM2G139160_T01	2.86505	8.15808	1.68006	RNA.regulation of transcription.C2H2 zinc finger family	moderately similar to ( 322) AT5G54630 | Symbols: | zinc finger protein-related | chr5:22192607-22194260 REVERSEhighly similar to ( 574) loc_os01g57650 12001.m11914 protein nucleic acid binding protein, putative, expressed seq=cds; coord=8:171805293..171810996:1; parent_gene=GRMZM2G139160	1.81633e-07	1.35563e-06
GRMZM2G338056_T01		6.80435	32.1081	RNA.regulation of transcription.C2H2 zinc finger family	very weakly similar to (81.6) loc_os11g47630 12011.m08563 protein zinc finger DNA-binding protein, putative, expressed seq=cds; coord=9:16478702..16479264:1; parent_gene=GRMZM2G338056	6.74877e-07	4.58264e-06
GRMZM2G106026_T01		3.86338	32.0333	RNA.regulation of transcription.C2H2 zinc finger family	very weakly similar to (97.8) AT5G04340 | Symbols: C2H2, CZF2, ZAT6 | ZAT6 (ZINC FINGER OF ARABIDOPSIS THALIANA 6); nucleic acid binding / transcription factor/ zinc ion binding | chr5:1216321-1217037 REVERSEvery weakly similar to (92.4) ZFP1_WHEAT Zinc-finger protein 1 (WZF1) - Triticum aestivum (Wheat)weakly similar to ( 197) loc_os03g32230 12003.m08467 protein zinc-finger protein 1, putative, …	1.30841e-06	8.44691e-06
GRMZM2G101058_T01	18.5163	42.3162	1.3598	RNA.regulation of transcription.C2C2(Zn) GATA transcription factor family	weakly similar to ( 147) AT2G45050 | Symbols: | zinc finger (GATA type) family protein | chr2:18582958-18583845 FORWARDweakly similar to ( 181) loc_os10g40810 12010.m06851 protein GATA transcription factor 9, putative, expressed seq=cds; coord=9:115956357..115958166:1; parent_gene=GRMZM2G101058	2.78991e-15	5.13221e-14
GRMZM2G077002_T01	4.71346	30.0171	2.83942	RNA.regulation of transcription.C2C2(Zn) GATA transcription factor family	weakly similar to ( 175) AT4G17570 | Symbols: | zinc finger (GATA type) family protein | chr4:9784329-9786974 REVERSEmoderately similar to ( 459) loc_os04g46020 12004.m35399 protein GATA transcription factor 29, putative, expressed seq=cds; coord=2:21398564..21402338:-1; parent_gene=GRMZM2G077002	1.18931e-39	1.02321e-37
GRMZM2G009406_T01	60.7764	187.044	1.79415	RNA.regulation of transcription.C2C2(Zn) DOF zinc finger family	weakly similar to ( 107) AT3G50410 | Symbols: OBP1 | OBP1 (OBF BINDING PROTEIN 1); DNA binding / protein binding / transcription factor | chr3:18709872-18710633 FORWARDweakly similar to ( 144) MNB1A_MAIZE Dof zinc finger protein MNB1A - Zea mays (Maize)moderately similar to ( 215) loc_os09g29960 12009.m06147 protein dof zinc finger protein MNB1A, putative, expressed seq=cds; coord=2:188526058..18…	6.21778e-42	5.97995e-40
GRMZM2G089850_T01	7.91608	30.0844	2.09625	RNA.regulation of transcription.C2C2(Zn) DOF zinc finger family	very weakly similar to (96.3) AT3G21270 | Symbols: ADOF2 | ADOF2; DNA binding / transcription factor | chr3:7474934-7475548 FORWARDweakly similar to ( 127) MNB1A_MAIZE Dof zinc finger protein MNB1A - Zea mays (Maize)weakly similar to ( 140) loc_os09g29960 12009.m06147 protein dof zinc finger protein MNB1A, putative, expressed seq=cds; coord=7:130360893..130362159:-1; parent_gene=GRMZM2G089850	1.52661e-20	4.3096e-19
GRMZM2G064655_T01	5.09511	44.6196	3.29742	RNA.regulation of transcription.C2C2(Zn) DOF zinc finger family	weakly similar to ( 120) AT5G60200 | Symbols: | Dof-type zinc finger domain-containing protein | chr5:24241078-24241951 FORWARDweakly similar to ( 121) PBF_MAIZE Dof zinc finger protein PBF (Prolamin box-binding factor) - Zea mays (Maize)weakly similar to ( 142) loc_os07g32510 12007.m07514 protein expressed protein seq=cds; coord=2:202417739..202419644:1; parent_gene=GRMZM2G064655	2.32265e-59	4.13726e-57
GRMZM2G010290_T02		3.02891	32.178	RNA.regulation of transcription.C2C2(Zn) DOF zinc finger family	weakly similar to ( 136) AT4G24060 | Symbols: | Dof-type zinc finger domain-containing protein | chr4:12503970-12505417 FORWARDweakly similar to ( 123) PBF_MAIZE Dof zinc finger protein PBF (Prolamin box-binding factor) - Zea mays (Maize)moderately similar to ( 294) loc_os04g47990 12004.m35186 protein dof zinc finger protein, putative, expressed seq=cds; coord=10:137204209..137206460:1; parent_ge…	3.48591e-07	2.48724e-06
grmzm2g405368_t01	10.0077	1.0298	-3.11642	RNA.regulation of transcription.C2C2(Zn) CO-like, Constans-like zinc finger family	weakly similar to ( 195) AT3G02380 | Symbols: COL2 | COL2 (constans-like 2); transcription factor/ zinc ion binding | chr3:487438-488624 REVERSEmoderately similar to ( 367) loc_os06g16370 12006.m06350 protein zinc finger protein CONSTANS, putative, expressed seq=cds; coord=9:34628528..34633066:1; parent_gene=GRMZM2G405368	1.25e-19	3.29e-18
grmzm5g866699_t02	3.4844	0.433681	-2.83778	RNA.regulation of transcription.C2C2(Zn) CO-like, Constans-like zinc finger family	weakly similar to ( 116) AT4G14540 | Symbols: NF-YB3 | NF-YB3 (NUCLEAR FACTOR Y, SUBUNIT B3); transcription factor | chr4:8344663-8345148 FORWARDweakly similar to ( 137) NFYB3_ORYSA Nuclear transcription factor Y subunit B-3 (OsNF-YB-3) (Transcriptional activator HAP3B) - Oryza sativa (Rice)moderately similar to ( 275) loc_os01g61900 12001.m12313 protein CCT, putative, expressed seq=cds; coord=8:…	3.31e-08	2.78e-07
grmzm2g095299_t01	5.3321	0.305491	-3.95697	RNA.regulation of transcription.C2C2(Zn) CO-like, Constans-like zinc finger family	moderately similar to ( 210) AT1G06040 | Symbols: STO | STO (SALT TOLERANCE); DNA binding / protein binding / transcription factor/ zinc ion binding | chr1:1828662-1829659 REVERSEmoderately similar to ( 325) loc_os02g39360 12002.m09024 protein salt tolerance-like protein, putative, expressed seq=cds; coord=5:182436034..182437499:-1; parent_gene=GRMZM2G095299	4.44e-08	3.66e-07
GRMZM2G148772_T01	2.65676	8.60589	1.86487	RNA.regulation of transcription.C2C2(Zn) CO-like, Constans-like zinc finger family	weakly similar to ( 122) AT5G57660 | Symbols: ATCOL5, COL5 | zinc finger (B-box type) family protein | chr5:23355573-23356729 FORWARDmoderately similar to ( 316) loc_os02g08150 12002.m06161 protein CONSTANS-like protein CO7, putative, expressed seq=cds; coord=5:89714407..89716192:1; parent_gene=GRMZM2G148772	4.13762e-08	3.42142e-07
grmzm2g174284_t01	28.723	9.8227	-1.3776	RNA.regulation of transcription.bZIP transcription factor family	moderately similar to ( 404) AT5G06950 | Symbols: AHBP-1B, TGA2 | AHBP-1B; DNA binding / transcription activator/ transcription factor/ transcription repressor | chr5:2152323-2154174 FORWARDmoderately similar to ( 409) HBP1C_WHEAT Transcription factor HBP-1b(c1) (Fragment) - Triticum aestivum (Wheat)moderately similar to ( 492) loc_os03g20310 12003.m35194 protein transcription factor HBP-1b, puta…	2.77e-13	4.22e-12
grmzm2g117851_t01	36.0027	5.57776	-2.51992	RNA.regulation of transcription.bZIP transcription factor family	weakly similar to ( 149) AT2G46270 | Symbols: GBF3 | GBF3 (G-BOX BINDING FACTOR 3); sequence-specific DNA binding / transcription factor | chr2:19000859-19002901 FORWARDweakly similar to ( 143) CPRF1_PETCR Common plant regulatory factor CPRF-1 - Petroselinum crispum (Parsley) (Petroselinum hortense)moderately similar to ( 366) loc_os01g46970 12001.m43121 protein G-box-binding factor 1, putative, …	2.2e-29	1.11e-27
grmzm2g473274_t01	46.8324	2.6167	-3.99133	RNA.regulation of transcription.bZIP transcription factor family	weakly similar to ( 199) AT4G38900 | Symbols: | bZIP protein | chr4:18139564-18141520 REVERSEweakly similar to ( 145) RF2A_ORYSA Transcription factor RF2a - Oryza sativa (Rice)moderately similar to ( 372) loc_os03g03550 12003.m05888 protein DNA binding protein, putative, expressed seq=cds; coord=9:153518496..153520218:-1; parent_gene=GRMZM2G473274	1.17e-42	1.16e-40
grmzm5g821024_t02	6.07204	0.913195	-2.56565	RNA.regulation of transcription.bZIP transcription factor family	weakly similar to ( 125) AT1G43700 | Symbols: VIP1 | VIP1 (VIRE2-INTERACTING PROTEIN 1); protein binding / transcription factor | chr1:16484352-16486017 FORWARDweakly similar to ( 111) RF2B_ORYSA Transcription factor RF2b - Oryza sativa (Rice)moderately similar to ( 207) loc_os12g06520 12012.m04642 protein transcription factor PosF21, putative, expressed seq=cds; coord=2:140322684..140326990:-1; …	5.55e-08	4.5e-07
grmzm2g019106_t01	4.77007	0.614904	-2.7859	RNA.regulation of transcription.bZIP transcription factor family	weakly similar to ( 192) AT1G32150 | Symbols: | bZIP transcription factor family protein | chr1:11566022-11568317 FORWARDmoderately similar to ( 351) HBP1A_WHEAT Transcription factor HBP-1a (Histone-specific transcription factor HBP1) - Triticum aestivum (Wheat)moderately similar to ( 369) loc_os02g03580 12002.m77766 protein transcription factor HBP-1a, putative, expressed seq=cds; coord=4:238990…	8.87e-08	6.98e-07
grmzm2g414007_t02	2.84952		-31.8731	RNA.regulation of transcription.bZIP transcription factor family	very weakly similar to (93.6) AT5G10030 | Symbols: TGA4, OBF4 | TGA4 (TGACG MOTIF-BINDING FACTOR 4); DNA binding / calmodulin binding / transcription factor | chr5:3137648-3139295 REVERSEvery weakly similar to (92.4) TGA1A_TOBAC TGACG-sequence-specific DNA-binding protein TGA-1A (TGA1a) (ASF-1 protein) - Nicotiana tabacum (Common tobacco)weakly similar to ( 102) loc_os04g54474 12004.m101669 prote…	2.54e-06	1.56e-05
GRMZM2G456512_T01	6.48727	12.7976	1.14938	RNA.regulation of transcription.bZIP transcription factor family	moderately similar to ( 345) AT1G21740 | Symbols: | unknown protein | chr1:7641580-7645078 FORWARDhighly similar to ( 920) loc_os05g35070 12005.m07737 protein expressed protein seq=cds; coord=6:147883617..147887710:-1; parent_gene=GRMZM2G456512	3.43342e-08	2.8709e-07
AC233853.1_FGT002	3.48884	13.2555	2.09405	RNA.regulation of transcription.bZIP transcription factor family	moderately similar to ( 273) AT3G58120 | Symbols: ATBZIP61, BZIP61 | BZIP61; DNA binding / transcription activator/ transcription factor | chr3:21521289-21523078 REVERSEvery weakly similar to (98.2) RF2B_ORYSA Transcription factor RF2b - Oryza sativa (Rice)moderately similar to ( 318) loc_os01g11350 12001.m07754 protein transcription factor RF2b, putative, expressed seq=cds; coord=3:3820868..3822…	3.34646e-08	2.80097e-07
GRMZM2G158313_T01	2.80237	9.63332	1.95116	RNA.regulation of transcription.bZIP transcription factor family	weakly similar to ( 160) AT3G58120 | Symbols: ATBZIP61, BZIP61 | BZIP61; DNA binding / transcription activator/ transcription factor | chr3:21521289-21523078 REVERSEvery weakly similar to (85.9) RF2A_ORYSA Transcription factor RF2a - Oryza sativa (Rice)moderately similar to ( 225) loc_os02g14910 12002.m06735 protein bZIP transcription factor family protein, expressed seq=cds; coord=5:143972500..1…	1.2843e-07	9.83201e-07
GRMZM2G037910_T01	2.469	7.60467	1.79348	RNA.regulation of transcription.bZIP transcription factor family	weakly similar to ( 166) AT2G21230 | Symbols: | bZIP family transcription factor | chr2:9093920-9096059 REVERSEweakly similar to ( 131) RF2A_ORYSA Transcription factor RF2a - Oryza sativa (Rice)moderately similar to ( 248) loc_os08g43090 12008.m08285 protein DNA binding protein, putative, expressed seq=cds; coord=2:194113075..194115135:1; parent_gene=GRMZM2G037910	2.87854e-07	2.0878e-06
GRMZM2G027976_T01	0.762184	9.39946	3.79294	RNA.regulation of transcription.bZIP transcription factor family	weakly similar to ( 173) AT3G58120 | Symbols: ATBZIP61, BZIP61 | BZIP61; DNA binding / transcription activator/ transcription factor | chr3:21521289-21523078 REVERSEvery weakly similar to (92.0) RF2B_ORYSA Transcription factor RF2b - Oryza sativa (Rice)moderately similar to ( 226) loc_os01g55150 12001.m11675 protein transcription factor RF2b, putative, expressed seq=cds; coord=3:196153277..196156…	1.37203e-19	3.59628e-18
grmzm2g019806_t01	35.0243	8.50262	-1.87112	RNA.regulation of transcription.bHLH,Basic Helix-Loop-Helix family	weakly similar to ( 181) AT2G22750 | Symbols: | basic helix-loop-helix (bHLH) family protein | chr2:9672145-9673624 FORWARDmoderately similar to ( 456) loc_os03g51580 12003.m10136 protein symbiotic ammonium transporter, putative, expressed seq=cds; coord=1:270980401..270982751:-1; parent_gene=GRMZM2G019806	1.6e-22	5.13e-21
grmzm2g133675_t01	20.1914	6.67396	-1.42493	RNA.regulation of transcription.bHLH,Basic Helix-Loop-Helix family	weakly similar to ( 117) AT3G47640 | Symbols: | basic helix-loop-helix (bHLH) family protein | chr3:17568035-17569101 FORWARDmoderately similar to ( 245) loc_os11g38870 12011.m080033 protein amelogenin precursor like protein, putative, expressed seq=cds; coord=4:6596882..6601837:1; parent_gene=GRMZM2G133675	7.85e-09	7.21e-08
grmzm2g440363_t01	23.2265	2.96104	-2.80335	RNA.regulation of transcription.bHLH,Basic Helix-Loop-Helix family	very weakly similar to (86.3) loc_os03g51910 12003.m10170 protein BHLH transcription factor, putative, expressed seq=cds; coord=1:22980029..22986648:1; parent_gene=GRMZM2G440363	3.33e-17	7.21e-16
grmzm2g017586_t01	10.1233	2.89996	-1.62954	RNA.regulation of transcription.bHLH,Basic Helix-Loop-Helix family	weakly similar to ( 148) AT5G54680 | Symbols: ILR3 | ILR3 (iaa-leucine resistant3); DNA binding / transcription factor | chr5:22217270-22218993 FORWARDmoderately similar to ( 307) loc_os08g04390 12008.m26570 protein bHLH transcription factor, putative, expressed seq=cds; coord=4:35575487..35578048:1; parent_gene=GRMZM2G017586	6.07e-06	3.49e-05
grmzm2g065374_t01	6.20488	1.58985	-1.799	RNA.regulation of transcription.bHLH,Basic Helix-Loop-Helix family	weakly similar to ( 159) AT3G59060 | Symbols: PIL6, PIF5 | PIL6 (PHYTOCHROME INTERACTING FACTOR 3-LIKE 6); DNA binding / transcription factor | chr3:21828189-21829895 REVERSEmoderately similar to ( 379) loc_os03g56950 12003.m101598 protein phytochrome-interacting factor 4, putative, expressed seq=cds; coord=1:283599877..283604922:-1; parent_gene=GRMZM2G065374	3.77e-08	3.14e-07
grmzm2g061906_t02	9.93955	1.52018	-2.54056	RNA.regulation of transcription.bHLH,Basic Helix-Loop-Helix family	weakly similar to ( 107) loc_os05g38140 12005.m27864 protein bHLH transcription factor, putative, expressed seq=cds; coord=6:151125421..151127445:1; parent_gene=GRMZM2G061906	6.8e-13	9.9e-12
grmzm2g139372_t01	5.94175	1.2482	-2.08225	RNA.regulation of transcription.bHLH,Basic Helix-Loop-Helix family	weakly similar to ( 137) AT2G16910 | Symbols: AMS | AMS (ABORTED MICROSPORES); DNA binding / transcription factor | chr2:7331721-7334077 FORWARDmoderately similar to ( 276) loc_os02g02820 12002.m05632 protein helix-loop-helix DNA-binding domain containing protein, expressed seq=cds; coord=4:237951075..237952939:-1; parent_gene=GRMZM2G139372	2.23e-06	1.39e-05
grmzm2g017414_t03	2.69218	0.249161	-3.26485	RNA.regulation of transcription.bHLH,Basic Helix-Loop-Helix family	moderately similar to ( 230) AT2G27230 | Symbols: LHW | LHW (LONESOME HIGHWAY); protein homodimerization/ transcription activator/ transcription factor | chr2:11650895-11653840 FORWARDhighly similar to ( 643) loc_os02g45170 12002.m09556 protein expressed protein seq=cds; coord=10:137163491..137169956:1; parent_gene=GRMZM2G017414	3.2e-08	2.68e-07
GRMZM2G042101_T01	95.0178	520.652	2.62078	RNA.regulation of transcription.bHLH,Basic Helix-Loop-Helix family	very weakly similar to (91.7) loc_os02g51320 12002.m10166 protein DNA binding protein, putative, expressed seq=cds; coord=4:181897625..181898975:1; parent_gene=GRMZM2G042101	1.44714e-87	6.90641e-85
GRMZM2G082343_T01	7.06326	15.755	1.32132	RNA.regulation of transcription.bHLH,Basic Helix-Loop-Helix family	weakly similar to ( 179) AT2G22750 | Symbols: | basic helix-loop-helix (bHLH) family protein | chr2:9672145-9673624 FORWARDmoderately similar to ( 421) loc_os03g51580 12003.m10136 protein symbiotic ammonium transporter, putative, expressed seq=cds; coord=5:9616539..9619038:1; parent_gene=GRMZM2G082343	2.77136e-09	2.6899e-08
GRMZM2G041636_T01	0.975697	6.65214	2.93868	RNA.regulation of transcription.bHLH,Basic Helix-Loop-Helix family	very weakly similar to (80.5) loc_os03g19780 12003.m07393 protein expressed protein seq=cds; coord=7:174327890..174328868:-1; parent_gene=GRMZM2G041636	1.28946e-07	9.8596e-07
grmzm2g313737_t01	27.4132	4.48494	-2.43944	RNA.regulation of transcription.B3 transcription factor family	highly similar to ( 562) loc_os01g52540 12001.m11427 protein B3 DNA binding domain containing protein, expressed seq=cds; coord=8:155839328..155847673:-1; parent_gene=GRMZM2G313737	4.26e-45	4.75e-43
grmzm2g088427_t01	10.1153	2.62766	-1.77417	RNA.regulation of transcription.B3 transcription factor family	weakly similar to ( 107) AT4G33280 | Symbols: | DNA binding / transcription factor | chr4:16047357-16049310 REVERSEmoderately similar to ( 295) loc_os03g42370 12003.m09294 protein B3 DNA binding domain containing protein seq=cds; coord=1:254427709..254429811:1; parent_gene=GRMZM2G088427	7.78e-07	5.23e-06
grmzm2g115357_t02	114.257	40.9069	-1.30937	RNA.regulation of transcription.Aux/IAA family	weakly similar to ( 158) AT5G43700 | Symbols: ATAUX2-11, IAA4 | ATAUX2-11 (AUXIN INDUCIBLE 2-11); DNA binding / transcription factor | chr5:17550465-17551206 FORWARDmoderately similar to ( 212) IAA24_ORYSA Auxin-responsive protein IAA24 (Indoleacetic acid-induced protein 24) - Oryza sativa (Rice)moderately similar to ( 212) loc_os07g08460 12007.m29084 protein OsIAA24 - Auxin-responsive Aux/IAA ge…	3.41e-17	7.38e-16
grmzm2g137367_t01	2.36472		-32.4355	RNA.regulation of transcription.Aux/IAA family	weakly similar to ( 189) AT3G52390 | Symbols: | tatD-related deoxyribonuclease family protein | chr3:19423105-19425183 REVERSEweakly similar to ( 124) CYSP1_MAIZE Cysteine proteinase 1 precursor (EC 3.4.22.-) - Zea mays (Maize)moderately similar to ( 216) loc_os07g06440 12007.m05105 protein deoxyribonuclease tatD, putative, expressed seq=cds; coord=1:6556850..6567830:1; parent_gene=GRMZM2G137367	5.45e-08	4.42e-07
GRMZM2G077356_T01	14.5641	36.8583	1.50871	RNA.regulation of transcription.Aux/IAA family	weakly similar to ( 171) AT3G04730 | Symbols: IAA16 | IAA16; transcription factor | chr3:1288993-1290415 REVERSEmoderately similar to ( 226) IAA13_ORYSA Auxin-responsive protein IAA13 (Indoleacetic acid-induced protein 13) - Oryza sativa (Rice)moderately similar to ( 226) loc_os03g53150 12003.m10289 protein OsIAA13 - Auxin-responsive Aux/IAA gene family member, expressed seq=cds; coord=5:7772505.…	1.91249e-16	3.91697e-15
GRMZM2G037368_T01	6.59048	21.5578	1.88151	RNA.regulation of transcription.Aux/IAA family	weakly similar to ( 176) AT2G22670 | Symbols: IAA8 | IAA8; transcription factor | chr2:9637136-9638459 FORWARDmoderately similar to ( 292) IAA5_ORYSA Auxin-responsive protein IAA5 (Indoleacetic acid-induced protein 5) - Oryza sativa (Rice)moderately similar to ( 292) loc_os01g48444 12001.m11036 protein OsIAA5 - Auxin-responsive Aux/IAA gene family member, expressed seq=cds; coord=3:209094740..209…	4.79754e-16	9.54751e-15
GRMZM2G121309_T01	3.27644	16.5768	2.50701	RNA.regulation of transcription.Aux/IAA family	weakly similar to ( 189) AT3G16500 | Symbols: PAP1, IAA26 | PAP1 (PHYTOCHROME-ASSOCIATED PROTEIN 1); transcription factor | chr3:5612801-5614208 REVERSEmoderately similar to ( 305) IAA7_ORYSA Auxin-responsive protein IAA7 (Indoleacetic acid-induced protein 7) - Oryza sativa (Rice)moderately similar to ( 305) loc_os02g13520 12002.m06598 protein OsIAA7 - Auxin-responsive Aux/IAA gene family member,…	2.37102e-22	7.45001e-21
GRMZM2G143352_T01	0.785209	12.9899	4.21748	RNA.regulation of transcription.Aux/IAA family	very weakly similar to (94.7) AT5G57420 | Symbols: IAA33 | IAA33 (INDOLE-3-ACETIC ACID INDUCIBLE 33); transcription factor | chr5:23270024-23270959 FORWARDvery weakly similar to (92.8) loc_os04g55950 12004.m10486 protein expressed protein seq=cds; coord=10:145949349..145950277:1; parent_gene=GRMZM2G143352	4.94581e-14	8.08134e-13
ac233943.1_fgt002	4.25347		-31.7401	RNA.regulation of transcription.AS2,Lateral Organ Boundaries Gene Family	moderately similar to ( 209) AT5G63090 | Symbols: LOB | LOB (LATERAL ORGAN BOUNDARIES) | chr5:25308723-25309283 REVERSEmoderately similar to ( 327) loc_os01g07480 12001.m42608 protein ramosa 2, putative, expressed seq=cds; coord=3:12882491..12883276:1; parent_gene=AC233943.1_FG002	4.94e-06	2.88e-05
GRMZM2G386674_T01	212.028	451.266	1.25756	RNA.regulation of transcription.AS2,Lateral Organ Boundaries Gene Family	weakly similar to ( 160) AT3G02550 | Symbols: LBD41 | LBD41 (LOB DOMAIN-CONTAINING PROTEIN 41) | chr3:536747-537650 REVERSEmoderately similar to ( 220) loc_os01g32770 12001.m09596 protein seed specific protein Bn15D17A, putative, expressed seq=cds; coord=6:159117664..159118989:-1; parent_gene=GRMZM2G386674	8.78669e-25	3.25881e-23
GRMZM2G177110_T01	28.9305	65.7925	1.3527	RNA.regulation of transcription.AS2,Lateral Organ Boundaries Gene Family	weakly similar to ( 181) AT5G67420 | Symbols: LBD37 | LBD37 (LOB DOMAIN-CONTAINING PROTEIN 37) | chr5:26904576-26905415 REVERSEmoderately similar to ( 244) loc_os07g40000 12007.m08242 protein seed specific protein Bn15D17A, putative, expressed seq=cds; coord=2:208854344..208855480:1; parent_gene=GRMZM2G177110	1.93011e-14	3.28755e-13
GRMZM2G073044_T01	28.4288	104.528	2.04688	RNA.regulation of transcription.AS2,Lateral Organ Boundaries Gene Family	weakly similar to ( 176) AT3G02550 | Symbols: LBD41 | LBD41 (LOB DOMAIN-CONTAINING PROTEIN 41) | chr3:536747-537650 REVERSEmoderately similar to ( 237) loc_os01g32770 12001.m09596 protein seed specific protein Bn15D17A, putative, expressed seq=cds; coord=8:123469338..123470737:-1; parent_gene=GRMZM2G073044	1.50217e-40	1.35217e-38
GRMZM2G060544_T01	17.3339	153.826	3.31234	RNA.regulation of transcription.AS2,Lateral Organ Boundaries Gene Family	weakly similar to ( 194) AT3G02550 | Symbols: LBD41 | LBD41 (LOB DOMAIN-CONTAINING PROTEIN 41) | chr3:536747-537650 REVERSEmoderately similar to ( 226) loc_os01g32770 12001.m09596 protein seed specific protein Bn15D17A, putative, expressed seq=cds; coord=1:72351668..72352962:-1; parent_gene=GRMZM2G060544	3.18178e-90	1.6096e-87
GRMZM2G132693_T01	6.78301	19.6823	1.70776	RNA.regulation of transcription.AS2,Lateral Organ Boundaries Gene Family	moderately similar to ( 205) AT1G67100 | Symbols: LBD40 | LBD40 (LOB DOMAIN-CONTAINING PROTEIN 40) | chr1:25053801-25054659 FORWARDmoderately similar to ( 330) loc_os01g03890 12001.m07025 protein seed specific protein Bn15D17A, putative seq=cds; coord=3:23101310..23102645:-1; parent_gene=GRMZM2G132693	2.85591e-11	3.50497e-10
GRMZM2G150594_T01	2.21113	7.14084	1.86252	RNA.regulation of transcription.AS2,Lateral Organ Boundaries Gene Family	moderately similar to ( 202) AT2G45420 | Symbols: LBD18 | LBD18 (LOB DOMAIN-CONTAINING PROTEIN 18) | chr2:18718601-18720445 FORWARDmoderately similar to ( 234) loc_os03g14270 12003.m06869 protein ramosa 2, putative seq=cds; coord=9:142754894..142757043:1; parent_gene=GRMZM2G150594	1.47501e-06	9.42141e-06
grmzm2g409974_t01	50.268	11.141	-2.00577	RNA.regulation of transcription.ARR	moderately similar to ( 338) AT2G25180 | Symbols: ARR12 | ARR12 (ARABIDOPSIS RESPONSE REGULATOR 12); transcription factor/ two-component response regulator | chr2:10724490-10726961 REVERSEvery weakly similar to (93.6) PRR95_ORYSA Two-component response regulator-like PRR95 (Pseudo-response regulator 95) (OsPRR95) - Oryza sativa (Rice)highly similar to ( 816) loc_os06g08440 12006.m05563 protein tw…	4.53e-35	3.12e-33
grmzm2g341405_t04	22.8784	1.46589	-3.79766	RNA.regulation of transcription.ARR	weakly similar to ( 117) AT2G25180 | Symbols: ARR12 | ARR12 (ARABIDOPSIS RESPONSE REGULATOR 12); transcription factor/ two-component response regulator | chr2:10724490-10726961 REVERSEweakly similar to ( 133) loc_os02g08500 12002.m06196 protein two-component response regulator ARR12, putative, expressed seq=cds; coord=2:182509540..182519101:1; parent_gene=GRMZM2G341405	6.59e-43	6.59e-41
grmzm2g148056_t01	21.939	1.38198	-3.81936	RNA.regulation of transcription.ARR	weakly similar to ( 121) AT3G57040 | Symbols: ARR9, ATRR4 | ARR9 (RESPONSE REGULATOR 9); transcription regulator/ two-component response regulator | chr3:21110059-21111228 FORWARDweakly similar to ( 183) loc_os07g26720 12007.m06949 protein OsRR7 - Rice type-A response regulator, expressed seq=cds; coord=7:40616672..40618501:1; parent_gene=GRMZM2G148056	9.43e-28	4.33e-26
grmzm2g133262_t01	4.36775	0.30464	-3.67412	RNA.regulation of transcription.ARR	very weakly similar to (90.5) AT5G58080 | Symbols: ARR18 | ARR18 (ARABIDOPSIS RESPONSE REGULATOR 18); transcription factor/ two-component response regulator | chr5:23501785-23504099 REVERSEvery weakly similar to (93.2) loc_os01g67770 12001.m12881 protein two-component response regulator ARR11, putative, expressed seq=cds; coord=5:58805731..58817464:-1; parent_gene=GRMZM2G133262	1.22e-11	1.57e-10
GRMZM2G177220_T01	2.83331	7.37056	1.54791	RNA.regulation of transcription.ARR	moderately similar to ( 332) AT1G67710 | Symbols: ARR11 | ARR11 (RESPONSE REGULATOR 11); transcription factor/ two-component response regulator | chr1:25376994-25378905 REVERSEvery weakly similar to (99.4) PRR95_ORYSA Two-component response regulator-like PRR95 (Pseudo-response regulator 95) (OsPRR95) - Oryza sativa (Rice)highly similar to ( 905) loc_os01g67770 12001.m12881 protein two-component …	2.85737e-07	2.07387e-06
grmzm2g441583_t01	59.9889	24.2772	-1.13718	RNA.regulation of transcription.Argonaute	nearly identical (1387) AT1G48410 | Symbols: AGO1 | AGO1 (ARGONAUTE 1); endoribonuclease/ miRNA binding / protein binding / siRNA binding | chr1:17886285-17891892 REVERSEnearly identical (1584) loc_os04g47870 12004.m09728 protein PINHEAD protein, putative, expressed seq=cds; coord=6:43093883..43102333:1; parent_gene=GRMZM2G441583	9.83e-17	2.05e-15
grmzm2g432075_t01	18.0136	6.44333	-1.31364	RNA.regulation of transcription.Argonaute	moderately similar to ( 346) AT2G32940 | Symbols: AGO6 | AGO6 (ARGONAUTE 6); nucleic acid binding | chr2:13972218-13976856 REVERSEmoderately similar to ( 432) loc_os07g16224 12007.m06064 protein argonaute-like protein, putative, expressed seq=cds; coord=7:71981965..71989975:-1; parent_gene=GRMZM2G432075	5.77e-07	3.98e-06
ac209206.3_fgt011	24.6157	4.08905	-2.42105	RNA.regulation of transcription.Argonaute	nearly identical (1382) AT1G48410 | Symbols: AGO1 | AGO1 (ARGONAUTE 1); endoribonuclease/ miRNA binding / protein binding / siRNA binding | chr1:17886285-17891892 REVERSEnearly identical (1631) loc_os04g47870 12004.m09728 protein PINHEAD protein, putative, expressed seq=cds; coord=10:137481424..137487962:1; parent_gene=AC209206.3_FG011	2.7e-34	1.77e-32
ac189879.3_fgt003	6.78827	1.55568	-1.95627	RNA.regulation of transcription.Argonaute	nearly identical (1375) AT5G43810 | Symbols: ZLL, PNH, AGO10 | ZLL (ZWILLE); translation initiation factor | chr5:17611939-17616562 FORWARDnearly identical (1598) loc_os06g39640 12006.m08501 protein PINHEAD protein, putative, expressed seq=cds; coord=9:86402098..86407999:1; parent_gene=AC189879.3_FG003	2.59e-10	2.85e-09
grmzm5g852073_t01	17.553	0.736702	-4.40351	RNA.regulation of transcription.Argonaute	very weakly similar to (90.5) AT1G48410 | Symbols: AGO1 | AGO1 (ARGONAUTE 1); endoribonuclease/ miRNA binding / protein binding / siRNA binding | chr1:17886285-17891892 REVERSEvery weakly similar to ( 100) loc_os03g57560 12003.m10673 protein piwi domain containing protein, expressed seq=cds; coord=5:151994318..151995665:-1; parent_gene=GRMZM5G852073	7.09e-16	1.38e-14
GRMZM2G007791_T01	13.2554	34.527	1.54978	RNA.regulation of transcription.Argonaute	highly similar to ( 563) AT1G31280 | Symbols: AGO2 | AGO2 (argonaute 2); nucleic acid binding | chr1:11181777-11185112 FORWARDnearly identical (1221) loc_os04g52540 12004.m10147 protein eukaryotic translation initiation factor 2C 2, putative, expressed seq=cds; coord=2:9970341..9977865:-1; parent_gene=GRMZM2G007791	3.72152e-24	1.31838e-22
grmzm2g160005_t01	107.523	36.9191	-1.37389	RNA.regulation of transcription.ARF, Auxin Response Factor family	highly similar to ( 690) AT1G19220 | Symbols: ARF19, IAA22, ARF11 | ARF19 (AUXIN RESPONSE FACTOR 19); DNA binding / transcription factor | chr1:6628395-6632779 REVERSEhighly similar to ( 855) loc_os06g09660 12006.m05684 protein auxin response factor 19, putative, expressed seq=cds; coord=9:11123414..11135490:-1; parent_gene=GRMZM2G160005	2.36e-26	9.7e-25
grmzm2g089640_t01	33.7216	14.1954	-1.08375	RNA.regulation of transcription.ARF, Auxin Response Factor family	moderately similar to ( 381) AT1G30330 | Symbols: ARF6 | ARF6 (AUXIN RESPONSE FACTOR 6); transcription factor | chr1:10686125-10690036 REVERSEhighly similar to ( 891) loc_os06g46410 12006.m091759 protein auxin response factor 6, putative, expressed seq=cds; coord=6:91321754..91324708:1; parent_gene=GRMZM2G089640	8.58e-10	8.84e-09
grmzm2g081158_t01	15.0296	3.39357	-1.97794	RNA.regulation of transcription.ARF, Auxin Response Factor family	highly similar to ( 751) AT1G30330 | Symbols: ARF6 | ARF6 (AUXIN RESPONSE FACTOR 6); transcription factor | chr1:10686125-10690036 REVERSEnearly identical (1256) loc_os12g41950 12012.m07976 protein auxin response factor 6, putative, expressed seq=cds; coord=1:173415235..173423230:-1; parent_gene=GRMZM2G081158	9.52e-22	2.88e-20
grmzm2g030710_t01	8.5433	2.89916	-1.39136	RNA.regulation of transcription.ARF, Auxin Response Factor family	moderately similar to ( 442) AT2G33860 | Symbols: ETT, ARF3 | ETT (ETTIN); DNA binding / transcription factor | chr2:14325444-14328613 REVERSEhighly similar to ( 918) loc_os05g48870 12005.m083814 protein auxin response factor 4, putative, expressed seq=cds; coord=6:164519768..164525033:1; parent_gene=GRMZM2G030710	1.06e-07	8.22e-07
GRMZM2G023813_T01	0.873665	7.24124	3.22107	RNA.regulation of transcription.ARF, Auxin Response Factor family	moderately similar to ( 227) AT1G77850 | Symbols: ARF17 | ARF17 (AUXIN RESPONSE FACTOR 17); transcription factor | chr1:29272405-29275193 FORWARDmoderately similar to ( 318) loc_os04g59430 12004.m10819 protein B3 DNA binding domain containing protein, expressed seq=cds; coord=10:149197770..149199623:-1; parent_gene=GRMZM2G023813	1.0543e-13	1.65945e-12
grmzm2g069082_t01	31.1516	11.8358	-1.22444	RNA.regulation of transcription.AP2/EREBP, APETALA2/Ethylene-responsive element binding protein family	weakly similar to ( 143) loc_os09g35020 12009.m06502 protein dehydration-responsive element-binding protein 1D, putative, expressed seq=cds; coord=7:141126154..141127124:-1; parent_gene=GRMZM2G069082	2.03e-07	1.51e-06
grmzm2g119865_t01	8.21189	1.97602	-1.88555	RNA.regulation of transcription.AP2/EREBP, APETALA2/Ethylene-responsive element binding protein family	weakly similar to ( 104) AT2G23340 | Symbols: | AP2 domain-containing transcription factor, putative | chr2:9938186-9938716 FORWARDweakly similar to ( 151) loc_os06g07030 12006.m05428 protein dehydration responsive element binding protein, putative, expressed seq=cds; coord=6:79553937..79555390:1; parent_gene=GRMZM2G119865	1.38e-06	8.85e-06
grmzm2g480434_t01	48.3616	0.943559	-5.50882	RNA.regulation of transcription.AP2/EREBP, APETALA2/Ethylene-responsive element binding protein family	very weakly similar to (86.7) AT4G31060 | Symbols: | AP2 domain-containing transcription factor, putative | chr4:15116896-15117459 FORWARDvery weakly similar to (94.4) loc_os08g41030 12008.m08082 protein ethylene-responsive transcription factor 3, putative, expressed seq=cds; coord=1:189796291..189796899:-1; parent_gene=GRMZM2G480434	3.18e-33	1.96e-31
grmzm2g100727_t01	4.60255	0.283977	-3.84964	RNA.regulation of transcription.AP2/EREBP, APETALA2/Ethylene-responsive element binding protein family	very weakly similar to (99.0) AT5G50080 | Symbols: ERF110 | DNA binding / transcription factor | chr5:20365948-20366835 FORWARDvery weakly similar to (80.5) ERF1_ORYSA Ethylene-responsive transcription factor 1 (Ethylene-responsive element-binding factor 1) (EREBP-1) (OsEREBP1) - Oryza sativa (Rice)weakly similar to ( 159) loc_os05g36100 12005.m07840 protein DNA binding protein, putative, express…	1.39e-07	1.06e-06
grmzm2g174834_t04	4.46358	0.223765	-4.14865	RNA.regulation of transcription.AP2/EREBP, APETALA2/Ethylene-responsive element binding protein family	weakly similar to ( 142) AT3G54320 | Symbols: WRI1, WRI, ASML1 | WRI1 (WRINKLED 1); DNA binding / transcription factor | chr3:20114809-20118473 FORWARDweakly similar to ( 107) BBM2_BRANA Protein BABY BOOM 2 (BnBBM2) - Brassica napus (Rape)moderately similar to ( 268) loc_os12g03290 12012.m04328 protein AP2/EREBP transcriptional factor WRI1, putative, expressed seq=cds; coord=4:185732487..18573719…	1.44e-09	1.44e-08
GRMZM2G369472_T01	241.32	455.292	1.08742	RNA.regulation of transcription.AP2/EREBP, APETALA2/Ethylene-responsive element binding protein family	very weakly similar to (93.6) AT4G34410 | Symbols: RRTF1 | RRTF1 ({REDOX RESPONSIVE TRANSCRIPTION FACTOR 1); DNA binding / transcription factor | chr4:16451992-16452798 FORWARDmoderately similar to ( 204) loc_os08g36920 12008.m07680 protein AP2 domain containing protein, expressed seq=cds; coord=1:199639973..199641110:1; parent_gene=GRMZM2G369472	7.6763e-19	1.91862e-17
AC206951.3_FGT017	138.804	249.567	1.01467	RNA.regulation of transcription.AP2/EREBP, APETALA2/Ethylene-responsive element binding protein family	very weakly similar to (81.6) AT1G72360 | Symbols: | ethylene-responsive element-binding protein, putative | chr1:27241904-27242777 FORWARDvery weakly similar to (83.2) ERF1_ORYSA Ethylene-responsive transcription factor 1 (Ethylene-responsive element-binding factor 1) (EREBP-1) (OsEREBP1) - Oryza sativa (Rice)weakly similar to ( 144) loc_os03g08500 12003.m06358 protein ethylene-responsive elemen…	1.63308e-14	2.7948e-13
GRMZM2G132185_T01	137.492	298.922	1.2903	RNA.regulation of transcription.AP2/EREBP, APETALA2/Ethylene-responsive element binding protein family	very weakly similar to (89.7) AT5G44210 | Symbols: ERF9, ATERF9, ATERF-9 | ERF9 (ERF DOMAIN PROTEIN 9); DNA binding / transcription factor/ transcription repressor | chr5:17806742-17807344 FORWARDvery weakly similar to (91.7) ERF4_NICSY Ethylene-responsive transcription factor 4 (Ethylene-responsive element-binding factor 4 homolog) (EREBP-3) (NsERF3) - Nicotiana sylvestris (Wood tobacco)weakly s…	1.08949e-23	3.73915e-22
GRMZM2G164591_T01	83.1669	149.836	1.01865	RNA.regulation of transcription.AP2/EREBP, APETALA2/Ethylene-responsive element binding protein family	very weakly similar to (82.4) AT3G20310 | Symbols: ATERF-7, ATERF7, ERF7 | ERF7 (ETHYLINE RESPONSE FACTOR 7); DNA binding / protein binding / transcription factor/ transcription repressor | chr3:7085957-7086691 REVERSEvery weakly similar to (94.7) loc_os04g57340 12004.m10619 protein ethylene-responsive transcription factor 3, putative, expressed seq=cds; coord=10:147353754..147354869:-1; parent_g…	1.59574e-13	2.47472e-12
GRMZM2G173771_T01	78.9202	151.888	1.11575	RNA.regulation of transcription.AP2/EREBP, APETALA2/Ethylene-responsive element binding protein family	weakly similar to ( 142) loc_os02g52670 12002.m10297 protein ethylene-responsive element binding protein 2, putative, expressed seq=cds; coord=4:178590006..178591058:1; parent_gene=GRMZM2G173771	1.64352e-15	3.1093e-14
GRMZM2G103085_T01	68.6392	237.073	1.95615	RNA.regulation of transcription.AP2/EREBP, APETALA2/Ethylene-responsive element binding protein family	weakly similar to ( 122) loc_os02g52670 12002.m10297 protein ethylene-responsive element binding protein 2, putative, expressed seq=cds; coord=5:209896463..209897682:-1; parent_gene=GRMZM2G103085	1.29113e-46	1.57009e-44
GRMZM2G061487_T01	59.2565	184.096	1.80144	RNA.regulation of transcription.AP2/EREBP, APETALA2/Ethylene-responsive element binding protein family	weakly similar to ( 110) AT4G39780 | Symbols: | AP2 domain-containing transcription factor, putative | chr4:18458216-18459034 REVERSEmoderately similar to ( 202) loc_os08g31580 12008.m07152 protein DRE binding factor 1, putative, expressed seq=cds; coord=1:217586061..217587629:1; parent_gene=GRMZM2G061487	1.45462e-40	1.31404e-38
GRMZM2G322672_T01	26.2642	78.432	1.74552	RNA.regulation of transcription.AP2/EREBP, APETALA2/Ethylene-responsive element binding protein family	weakly similar to ( 111) loc_os06g47590 12006.m09285 protein ethylene-responsive transcription factor 3, putative, expressed seq=cds; coord=5:81761119..81763618:1; parent_gene=GRMZM2G322672	5.51816e-26	2.1946e-24
GRMZM2G097182_T01	20.7033	51.9656	1.49634	RNA.regulation of transcription.AP2/EREBP, APETALA2/Ethylene-responsive element binding protein family	weakly similar to ( 140) AT5G51990 | Symbols: CBF4, DREB1D | CBF4 (C- REPEAT-BINDING FACTOR 4); DNA binding / transcription activator/ transcription factor | chr5:21117113-21117787 REVERSEmoderately similar to ( 202) loc_os01g73770 12001.m13404 protein dehydration-responsive element-binding protein 1C, putative, expressed seq=cds; coord=3:145433993..145434884:-1; parent_gene=GRMZM2G097182	2.5781e-14	4.34448e-13
GRMZM2G110333_T01	19.6089	43.5643	1.31841	RNA.regulation of transcription.AP2/EREBP, APETALA2/Ethylene-responsive element binding protein family	weakly similar to ( 138) AT3G14230 | Symbols: RAP2.2 | RAP2.2; DNA binding / transcription factor | chr3:4737616-4739000 REVERSEmoderately similar to ( 373) ERF1_ORYSA Ethylene-responsive transcription factor 1 (Ethylene-responsive element-binding factor 1) (EREBP-1) (OsEREBP1) - Oryza sativa (Rice)moderately similar to ( 373) loc_os02g54160 12002.m10445 protein ethylene response element binding …	8.77466e-15	1.53702e-13
GRMZM2G142179_T01	16.758	45.1133	1.59775	RNA.regulation of transcription.AP2/EREBP, APETALA2/Ethylene-responsive element binding protein family	weakly similar to ( 114) AT4G23750 | Symbols: CRF2 | CRF2 (CYTOKININ RESPONSE FACTOR 2); DNA binding / transcription factor | chr4:12376751-12377782 FORWARDweakly similar to ( 101) ERF3_TOBAC Ethylene-responsive transcription factor 3 (Ethylene-responsive element-binding factor 3 homolog) (EREBP-5) (NtERF5) - Nicotiana tabacum (Common tobacco)moderately similar to ( 300) loc_os01g12440 12001.m078…	1.51518e-19	3.95511e-18
GRMZM2G466044_T01	16.3363	54.8338	1.92019	RNA.regulation of transcription.AP2/EREBP, APETALA2/Ethylene-responsive element binding protein family	weakly similar to ( 129) AT4G17500 | Symbols: ATERF-1 | ATERF-1 (ETHYLENE RESPONSIVE ELEMENT BINDING FACTOR 1); DNA binding / transcription activator/ transcription factor | chr4:9759405-9760211 FORWARDweakly similar to ( 131) ERF2_NICSY Ethylene-responsive transcription factor 2 (Ethylene-responsive element-binding factor 2) (EREBP-2) (NsERF2) - Nicotiana sylvestris (Wood tobacco)moderately simi…	8.75043e-29	4.3061e-27
GRMZM2G053503_T02	15.6665	54.5726	1.96968	RNA.regulation of transcription.AP2/EREBP, APETALA2/Ethylene-responsive element binding protein family	very weakly similar to (82.0) AT2G47520 | Symbols: | AP2 domain-containing transcription factor, putative | chr2:19502891-19503490 REVERSEweakly similar to ( 169) loc_os01g21120 12001.m08596 protein ethylene-responsive factor-like protein 1, putative, expressed seq=cds; coord=8:35561739..35562916:1; parent_gene=GRMZM2G053503	3.07965e-24	1.09713e-22
GRMZM5G846057_T01	9.24863	26.6309	1.69481	RNA.regulation of transcription.AP2/EREBP, APETALA2/Ethylene-responsive element binding protein family	weakly similar to ( 124) AT1G64380 | Symbols: | AP2 domain-containing transcription factor, putative | chr1:23890981-23891988 REVERSEvery weakly similar to (85.5) ERF1_ORYSA Ethylene-responsive transcription factor 1 (Ethylene-responsive element-binding factor 1) (EREBP-1) (OsEREBP1) - Oryza sativa (Rice)moderately similar to ( 238) loc_os05g49700 12005.m09040 protein DNA binding protein, putativ…	8.4961e-16	1.64801e-14
GRMZM2G129674_T01	8.38482	17.5216	1.22992	RNA.regulation of transcription.AP2/EREBP, APETALA2/Ethylene-responsive element binding protein family	very weakly similar to (92.8) AT5G13330 | Symbols: Rap2.6L | Rap2.6L (related to AP2 6L); DNA binding / transcription factor | chr5:4272384-4274461 FORWARDvery weakly similar to (89.7) ERF1_ORYSA Ethylene-responsive transcription factor 1 (Ethylene-responsive element-binding factor 1) (EREBP-1) (OsEREBP1) - Oryza sativa (Rice)weakly similar to ( 130) loc_os03g08460 12003.m06354 protein transcript…	1.98469e-07	1.47259e-06
GRMZM5G842961_T01	8.01733	23.6557	1.73003	RNA.regulation of transcription.AP2/EREBP, APETALA2/Ethylene-responsive element binding protein family	weakly similar to ( 136) AT2G44940 | Symbols: | AP2 domain-containing transcription factor TINY, putative | chr2:18537294-18538181 FORWARDvery weakly similar to (80.9) ERF1_ORYSA Ethylene-responsive transcription factor 1 (Ethylene-responsive element-binding factor 1) (EREBP-1) (OsEREBP1) - Oryza sativa (Rice)moderately similar to ( 204) loc_os02g43940 12002.m09429 protein transcriptional factor …	5.52371e-10	5.80942e-09
GRMZM2G060465_T01	5.79616	17.899	1.79556	RNA.regulation of transcription.AP2/EREBP, APETALA2/Ethylene-responsive element binding protein family	seq=cds; coord=4:184862676..184863499:-1; parent_gene=GRMZM2G060465	1.95899e-08	1.70394e-07
GRMZM2G007406_T01	5.39094	59.7937	3.63741	RNA.regulation of transcription.AP2/EREBP, APETALA2/Ethylene-responsive element binding protein family	very weakly similar to (83.6) AT1G21910 | Symbols: | AP2 domain-containing transcription factor family protein | chr1:7696655-7697347 FORWARDvery weakly similar to (94.7) loc_os03g15660 12003.m07003 protein AP2 domain containing protein, expressed seq=cds; coord=9:140949345..140950289:1; parent_gene=GRMZM2G007406	1.99681e-50	2.73013e-48
GRMZM5G889719_T01	4.89271	25.8107	2.56843	RNA.regulation of transcription.AP2/EREBP, APETALA2/Ethylene-responsive element binding protein family	weakly similar to ( 124) AT2G44940 | Symbols: | AP2 domain-containing transcription factor TINY, putative | chr2:18537294-18538181 FORWARDvery weakly similar to (84.7) ERF3_TOBAC Ethylene-responsive transcription factor 3 (Ethylene-responsive element-binding factor 3 homolog) (EREBP-5) (NtERF5) - Nicotiana tabacum (Common tobacco)weakly similar to ( 173) loc_os10g41130 12010.m06878 protein DREB-l…	2.82126e-17	6.17309e-16
GRMZM2G300924_T01	3.12597	12.8053	2.20398	RNA.regulation of transcription.AP2/EREBP, APETALA2/Ethylene-responsive element binding protein family	weakly similar to ( 150) AT2G20880 | Symbols: | AP2 domain-containing transcription factor, putative | chr2:8986053-8987063 FORWARDvery weakly similar to (85.1) ERF5_TOBAC Ethylene-responsive transcription factor 5 (Ethylene-responsive element-binding factor 5 homolog) (EREBP-4) (NtERF4) - Nicotiana tabacum (Common tobacco)moderately similar to ( 275) loc_os04g44670 12004.m09426 protein AP2 domai…	2.49929e-17	5.48759e-16
GRMZM2G123119_T01	1.75297	12.8462	3.04457	RNA.regulation of transcription.AP2/EREBP, APETALA2/Ethylene-responsive element binding protein family	weakly similar to ( 112) AT1G06160 | Symbols: ORA59 | ORA59 (OCTADECANOID-RESPONSIVE ARABIDOPSIS AP2/ERF 59); DNA binding / transcription activator/ transcription factor | chr1:1883046-1883780 FORWARDvery weakly similar to (93.2) ERF5_TOBAC Ethylene-responsive transcription factor 5 (Ethylene-responsive element-binding factor 5 homolog) (EREBP-4) (NtERF4) - Nicotiana tabacum (Common tobacco)weakl…	1.94198e-13	2.99332e-12
GRMZM2G026926_T01	0.719716	6.84081	3.41796	RNA.regulation of transcription.AP2/EREBP, APETALA2/Ethylene-responsive element binding protein family	weakly similar to ( 156) AT2G20880 | Symbols: | AP2 domain-containing transcription factor, putative | chr2:8986053-8987063 FORWARDvery weakly similar to (87.0) ERF1_ORYSA Ethylene-responsive transcription factor 1 (Ethylene-responsive element-binding factor 1) (EREBP-1) (OsEREBP1) - Oryza sativa (Rice)moderately similar to ( 340) loc_os04g44670 12004.m09426 protein AP2 domain containing protein,…	2.97044e-17	6.48268e-16
GRMZM2G084264_T01	0.529788	6.37413	3.75754	RNA.regulation of transcription.AP2/EREBP, APETALA2/Ethylene-responsive element binding protein family	very weakly similar to (87.0) AT1G21910 | Symbols: | AP2 domain-containing transcription factor family protein | chr1:7696655-7697347 FORWARDweakly similar to ( 165) loc_os06g10780 12006.m05795 protein DNA binding protein, putative, expressed seq=cds; coord=6:109899548..109900749:1; parent_gene=GRMZM2G084264	5.95858e-11	7.0494e-10
GRMZM5G852704_T01	0.454861	8.02655	4.31089	RNA.regulation of transcription.AP2/EREBP, APETALA2/Ethylene-responsive element binding protein family	weakly similar to ( 135) AT1G22190 | Symbols: | AP2 domain-containing transcription factor, putative | chr1:7836245-7837030 FORWARDmoderately similar to ( 209) loc_os02g51670 12002.m10198 protein AP2 domain-containing protein, putative, expressed seq=cds; coord=9:5876876..5877925:-1; parent_gene=GRMZM5G852704	5.61628e-12	7.42982e-11
GRMZM2G141638_T01		2.34138	32.4868	RNA.regulation of transcription.AP2/EREBP, APETALA2/Ethylene-responsive element binding protein family	moderately similar to ( 354) AT5G17430 | Symbols: BBM | BBM (BABY BOOM); DNA binding / transcription factor | chr5:5742542-5745568 REVERSEmoderately similar to ( 353) BBM2_BRANA Protein BABY BOOM 2 (BnBBM2) - Brassica napus (Rape)highly similar to ( 676) loc_os01g67410 12001.m12845 protein AP2/EREBP transcription factor BABY BOOM, putative, expressed seq=cds; coord=3:166793199..166797020:1; paren…	6.81664e-09	6.31053e-08
grmzm2g110952_t03	3.45152	1.03817	-1.56285	RNA.regulation of transcription.Alfin-like	moderately similar to ( 460) AT1G73400 | Symbols: | pentatricopeptide (PPR) repeat-containing protein | chr1:27598412-27599812 FORWARDmoderately similar to ( 246) RS23_FRAAN 40S ribosomal protein S23 (S12) - Fragaria ananassa (Strawberry)highly similar to ( 682) loc_os02g52220 12002.m33882 protein ATP binding protein, putative, expressed seq=cds; coord=5:2576103..2593650:1; parent_gene=GRMZM2G110…	3.15e-07	2.27e-06
GRMZM2G082227_T01	3.32688	14.245	2.26616	RNA.regulation of transcription.ABI3/VP1-related B3-domain-containing transcription factor family	weakly similar to ( 189) AT2G46870 | Symbols: NGA1 | NGA1 (NGATHA1); transcription factor | chr2:19261313-19262245 FORWARDmoderately similar to ( 272) loc_os03g02900 12003.m05828 protein B3 DNA binding domain containing protein, expressed seq=cds; coord=1:4547696..4549322:1; parent_gene=GRMZM2G082227	1.68387e-15	3.17849e-14
GRMZM2G018336_T01	2.46915	8.62932	1.97546	RNA.regulation of transcription.ABI3/VP1-related B3-domain-containing transcription factor family	weakly similar to ( 177) AT1G25560 | Symbols: TEM1 | TEM1 (TEMPRANILLO 1); transcription factor | chr1:8981891-8982976 REVERSEmoderately similar to ( 265) loc_os01g49830 12001.m11168 protein DNA-binding protein RAV1, putative, expressed seq=cds; coord=5:28639860..28641213:-1; parent_gene=GRMZM2G018336	8.52675e-08	6.73986e-07
GRMZM2G102059_T01	1.63563	11.5263	2.98443	RNA.regulation of transcription.ABI3/VP1-related B3-domain-containing transcription factor family	weakly similar to ( 193) AT2G46870 | Symbols: NGA1 | NGA1 (NGATHA1); transcription factor | chr2:19261313-19262245 FORWARDmoderately similar to ( 338) loc_os02g45850 12002.m09622 protein B3 DNA binding domain containing protein, expressed seq=cds; coord=2:15022549..15024592:1; parent_gene=GRMZM2G102059	2.35238e-21	6.94295e-20
GRMZM2G142999_T01	0.839374	7.74249	3.37583	RNA.regulation of transcription.ABI3/VP1-related B3-domain-containing transcription factor family	weakly similar to ( 154) AT3G61970 | Symbols: NGA2 | NGA2 (NGATHA2); transcription factor | chr3:22951829-22952728 FORWARDmoderately similar to ( 278) loc_os10g39190 12010.m06689 protein RAV, putative seq=cds; coord=9:125563700..125564837:-1; parent_gene=GRMZM2G142999	5.56422e-11	6.59828e-10
