# Supplementary material for: Transcript profiles of maize embryo sacs and preliminary identification of genes involved in the embryo sac–pollen tube interaction
Source: Front Plant Sci. 2014 Dec 17;5:702. doi: 10.3389/fpls.2014.00702 (PMC4269116; doi:10.3389/fpls.2014.00702)
Supplement: Supplementary file 11 [file DataSheet11.XLS]

## Sheet: Sheet1
		Additional file 11 Transcripts involved in ubiquitin- dependent protien degradation process in DGEs
GeneID	Transcript ID	logFC(PES/ES)	RPKM(ES)	RPKM(PES)	RPKM(NU)	Classification	Description	P-value	FDR
GRMZM2G055052	GRMZM2G055052_T01	2.33641	66.1663	297.43		protein.degradation.ubiquitin.E3.RING	moderately similar to ( 230) AT5G37490 | Symbols: | U-box domain-containing protein | chr5:14887744-14889051 FORWARDweakly similar to ( 103) SPL11_ORYSA Spotted leaf protein 11 (Spotted leaf11) (Cell death-related protein SPL11) - Oryza sativa (Rice)highly similar to ( 545) loc_os03g13740 12003.m06818 protein immediate-early fungal elicitor protein CMPG1, putative, expressed seq=cds; coord=1:3222…	2.48e-70	6.81e-68
GRMZM2G040803	GRMZM2G040803_T01	1.82886	4.95077	15.6504	7.66502	protein.degradation.ubiquitin.E3.RING	weakly similar to ( 117) AT4G03510 | Symbols: RMA1 | RMA1; protein binding / ubiquitin-protein ligase/ zinc ion binding | chr4:1557905-1558654 REVERSEmoderately similar to ( 344) loc_os04g44820 12004.m09439 protein ring domain containing protein, putative, expressed seq=cds; coord=10:132511510..132515292:-1; parent_gene=GRMZM2G040803	5.43e-13	7.98e-12
GRMZM2G314412	GRMZM2G314412_T01	-2.39537	10.7649	1.82236	11.4451	protein.degradation.ubiquitin.E3.RING	very weakly similar to (88.2) AT1G29340 | Symbols: PUB17, ATPUB17 | PUB17 (PLANT U-BOX 17); ubiquitin-protein ligase | chr1:10264412-10266601 FORWARDhighly similar to ( 709) loc_os04g49500 12004.m09883 protein U-box domain containing protein, expressed seq=cds; coord=2:14545405..14548958:-1; parent_gene=GRMZM2G314412	3.39e-18	8.05e-17
GRMZM2G027375	GRMZM2G027375_T01	1.08622	37.5964	70.8926	21.7201	protein.degradation.ubiquitin.E3.RING	moderately similar to ( 414) AT5G01830 | Symbols: | armadillo/beta-catenin repeat family protein / U-box domain-containing protein | chr5:320983-323007 FORWARDweakly similar to ( 172) SPL11_ORYSA Spotted leaf protein 11 (Spotted leaf11) (Cell death-related protein SPL11) - Oryza sativa (Rice)highly similar to ( 900) loc_os01g60860 12001.m12214 protein spotted leaf protein 11, putative, expressed …	3.3e-15	6.01e-14
GRMZM2G073310	GRMZM2G073310_T01	1.00904	36.8776	65.9821	19.6281	protein.degradation.ubiquitin.E3.RING	very weakly similar to (86.3) AT3G18710 | Symbols: PUB29, ATPUB29 | PUB29 (PLANT U-BOX 29); ubiquitin-protein ligase | chr3:6434234-6435481 REVERSEmoderately similar to ( 434) loc_os05g36360 12005.m07866 protein photoperiod responsive protein, putative, expressed seq=cds; coord=6:149086737..149088411:1; parent_gene=GRMZM2G073310	1.26e-11	1.61e-10
GRMZM5G891990	GRMZM5G891990_T01	1.2689	8.81513	18.8785	67.2847	protein.degradation.ubiquitin.E3.RING	highly similar to ( 666) AT3G46510 | Symbols: PUB13, ATPUB13 | PUB13 (PLANT U-BOX 13); ubiquitin-protein ligase | chr3:17124106-17126539 REVERSEhighly similar to ( 691) SPL11_ORYSA Spotted leaf protein 11 (Spotted leaf11) (Cell death-related protein SPL11) - Oryza sativa (Rice)highly similar to ( 933) loc_os03g16824 12003.m07115 protein spotted leaf protein 11, putative, expressed seq=cds; coord=…	7.86e-12	1.03e-10
GRMZM2G059042	GRMZM2G059042_T01	1.47488	9.17281	22.7092	20.9823	protein.degradation.ubiquitin.E3.RING	weakly similar to ( 116) AT5G64660 | Symbols: ATCMPG2, CMPG2 | U-box domain-containing protein | chr5:25842119-25843381 REVERSEvery weakly similar to (81.3) SPL11_ORYSA Spotted leaf protein 11 (Spotted leaf11) (Cell death-related protein SPL11) - Oryza sativa (Rice)highly similar to ( 501) loc_os04g34140 12004.m08508 protein photoperiod responsive protein, putative, expressed seq=cds; coord=10:11…	7.59e-13	1.1e-11
GRMZM2G020196	GRMZM2G020196_T01	1.03465	14.2232	25.9002	10.0066	protein.degradation.ubiquitin.E3.RING	moderately similar to ( 496) AT1G29340 | Symbols: PUB17, ATPUB17 | PUB17 (PLANT U-BOX 17); ubiquitin-protein ligase | chr1:10264412-10266601 FORWARDmoderately similar to ( 258) SPL11_ORYSA Spotted leaf protein 11 (Spotted leaf11) (Cell death-related protein SPL11) - Oryza sativa (Rice)highly similar to ( 834) loc_os02g13960 12002.m06642 protein spotted leaf protein 11, putative, expressed seq=cds…	2.04e-10	2.27e-09
GRMZM2G475702	GRMZM2G475702_T01	2.73368	1.82378	10.7886	5.84645	protein.degradation.ubiquitin.E3.RING	moderately similar to ( 256) AT1G60190 | Symbols: | armadillo/beta-catenin repeat family protein / U-box domain-containing protein | chr1:22198403-22200463 FORWARDweakly similar to ( 177) SPL11_ORYSA Spotted leaf protein 11 (Spotted leaf11) (Cell death-related protein SPL11) - Oryza sativa (Rice)highly similar to ( 698) loc_os08g32060 12008.m07200 protein spotted leaf protein 11, putative, expres…	2.97e-19	7.61e-18
GRMZM2G476914	GRMZM2G476914_T01	-1.95948	16.2779	3.73042	39.1738	protein.degradation.ubiquitin.E3.RING	moderately similar to ( 468) AT3G49810 | Symbols: | U-box domain-containing protein | chr3:18474936-18476282 REVERSEweakly similar to ( 111) SPL11_ORYSA Spotted leaf protein 11 (Spotted leaf11) (Cell death-related protein SPL11) - Oryza sativa (Rice)highly similar to ( 733) loc_os03g13010 12003.m06748 protein ubiquitin-protein ligase, putative, expressed seq=cds; coord=1:29196148..29198817:1; par…	1.1e-17	2.49e-16
GRMZM2G389789	GRMZM2G389789_T01	-2.24797	5.0863	0.951933	1.14421	protein.degradation.ubiquitin.E3.RING	highly similar to ( 555) AT1G24330 | Symbols: | armadillo/beta-catenin repeat family protein / U-box domain-containing family protein | chr1:8631779-8634835 FORWARDweakly similar to ( 156) SPL11_ORYSA Spotted leaf protein 11 (Spotted leaf11) (Cell death-related protein SPL11) - Oryza sativa (Rice)highly similar to ( 855) loc_os04g41250 12004.m09104 protein ubiquitin-protein ligase, putative, expr…	3.32e-09	3.19e-08
GRMZM5G811633	GRMZM5G811633_T01	1.77547	4.83289	14.7077	28.3472	protein.degradation.ubiquitin.E3.RING	weakly similar to ( 178) AT3G19380 | Symbols: PUB25 | PUB25 (PLANT U-BOX 25); binding / ubiquitin-protein ligase | chr3:6714602-6715867 REVERSEvery weakly similar to (97.4) SPL11_ORYSA Spotted leaf protein 11 (Spotted leaf11) (Cell death-related protein SPL11) - Oryza sativa (Rice)moderately similar to ( 239) loc_os02g34410 12002.m08530 protein ubiquitin-protein ligase, putative, expressed seq=cd…	4.5e-09	4.25e-08
GRMZM5G855994	GRMZM5G855994_T01	3.58597	17.8905	190.815		protein.degradation.ubiquitin.E3.RING	weakly similar to ( 155) AT5G37490 | Symbols: | U-box domain-containing protein | chr5:14887744-14889051 FORWARDmoderately similar to ( 380) loc_os06g13870 12006.m06102 protein immediate-early fungal elicitor protein CMPG1, putative, expressed seq=cds; coord=9:1077761..1079077:-1; parent_gene=GRMZM5G855994	2.58e-109	2.04e-106
GRMZM2G349344	GRMZM2G349344_T01	-3.21045	2.93513	0.282511	7.66589	protein.postranslational modification.kinase.receptor like cytoplasmatic kinase IX	highly similar to ( 525) AT2G45910 | Symbols: | protein kinase family protein / U-box domain-containing protein | chr2:18894520-18898212 FORWARDweakly similar to ( 150) NORK_MEDTR Nodulation receptor kinase precursor (EC 2.7.11.1) (Does not make infections protein 2) (Symbiosis receptor-like kinase) (MtSYMRK) - Medicago truncatula (Barrel medic)highly similar to ( 672) loc_os10g40100 12010.m21803…	5.38e-08	4.37e-07
GRMZM2G160370	GRMZM2G160370_T01	1.43238	26.1565	62.8836	8.58767	protein.degradation.ubiquitin.E3.RING	highly similar to ( 537) AT1G29340 | Symbols: PUB17, ATPUB17 | PUB17 (PLANT U-BOX 17); ubiquitin-protein ligase | chr1:10264412-10266601 FORWARDmoderately similar to ( 263) SPL11_ORYSA Spotted leaf protein 11 (Spotted leaf11) (Cell death-related protein SPL11) - Oryza sativa (Rice)highly similar to ( 869) loc_os02g13960 12002.m06642 protein spotted leaf protein 11, putative, expressed seq=cds; co…	1.46e-25	5.66e-24
AC233865.1	AC233865.1_FGT004	2.15405	1.98441	7.85579		protein.degradation.ubiquitin.E3.RING	highly similar to ( 593) AT1G20780 | Symbols: PUB44, ATPUB44, SAUL1 | SAUL1 (SENESCENCE-ASSOCIATED E3 UBIQUITIN LIGASE 1); ubiquitin-protein ligase | chr1:7217812-7220609 FORWARDnearly identical (1115) loc_os12g17880 12012.m05744 protein ubiquitin-protein ligase, putative, expressed seq=cds; coord=7:146587604..146590486:1; parent_gene=AC233865.1_FG004	9.42e-13	1.35e-11
GRMZM2G031624	GRMZM2G031624_T01	2.05774	4.10463	15.1682		protein.degradation.ubiquitin.E3.RING	very weakly similar to (93.6) AT2G35930 | Symbols: PUB23 | PUB23 (PLANT U-BOX 23); ubiquitin-protein ligase | chr2:15083101-15084336 REVERSEvery weakly similar to (89.4) SPL11_ORYSA Spotted leaf protein 11 (Spotted leaf11) (Cell death-related protein SPL11) - Oryza sativa (Rice)weakly similar to ( 171) loc_os12g06410 12012.m04631 protein ubiquitin-protein ligase, putative, expressed seq=cds; coor…	7.88e-11	9.19e-10
GRMZM2G376085	GRMZM2G376085_T01	1.98001	12.9082	45.264	44.1157	protein.degradation.ubiquitin.E3.RING	highly similar to ( 573) AT2G23140 | Symbols: | binding / ubiquitin-protein ligase | chr2:9845696-9849105 REVERSEmoderately similar to ( 204) SPL11_ORYSA Spotted leaf protein 11 (Spotted leaf11) (Cell death-related protein SPL11) - Oryza sativa (Rice)highly similar to ( 881) loc_os01g66130 12001.m12721 protein armadillo-repeat containing protein, putative, expressed seq=cds; coord=3:170771541..17…	9.34e-37	7.05e-35
GRMZM2G132671	GRMZM2G132671_T01	-3.98385	17.4534	0.981263	81.5718	RNA.processing.splicing	weakly similar to ( 169) AT2G33340 | Symbols: | nucleotide binding / ubiquitin-protein ligase | chr2:14126703-14131000 REVERSEweakly similar to ( 194) loc_os10g32880 12010.m21914 protein pre-mRNA-splicing factor 19, putative, expressed seq=cds; coord=5:129412143..129417585:1; parent_gene=GRMZM2G132671	7.87e-18	1.81e-16
