# Supplementary material for: Transcript profiles of maize embryo sacs and preliminary identification of genes involved in the embryo sac–pollen tube interaction
Source: Front Plant Sci. 2014 Dec 17;5:702. doi: 10.3389/fpls.2014.00702 (PMC4269116; doi:10.3389/fpls.2014.00702)
Supplement: Supplementary file 13 [file DataSheet13.XLS]

## Sheet: 1
		Additional file 13 Transcripts involved in stress responses in DEGs
TranscriptID	GeneID	Classification( according to GO /mapman)	Classification（according to mapman）	logFC(ESP/ES)	P-value	FDR	Description	ESRPKM	ESPRPKM	NURPKM
GRMZM2G053939_T01	GRMZM2G053939	response to abiotic stimulus/response to cold	amino acid metabolism.synthesis.central amino acid metabolism.alanine.alanine aminotransferase	1.48454	1.38e-07	1.05e-06	weakly similar to ( 181) AT1G17290 | Symbols: AlaAT1 | AlaAT1 (ALANINE AMINOTRANSFERAS); ATP binding / L-alanine:2-oxoglutarate aminotransferase | chr1:5922771-5926093 FORWARDweakly similar to ( 175) ALA2_HORVU Alanine aminotransferase 2 (EC 2.6.1.2) (GPT) (Glutamic--pyruvic transaminase 2) (Glutamic--alanine transaminase 2) (ALAAT-2) - Hordeum vulgare (Barley)moderately similar to ( 227) loc_os0…	11.3896	28.3203	26.903
GRMZM2G013430_T01	GRMZM2G013430	response to abiotic stimulus/response to cold	amino acid metabolism.synthesis.serine-glycine-cysteine group.cysteine.SAT	2.09452	9.76e-17	2.04e-15	moderately similar to ( 218) AT1G55920 | Symbols: ATSERAT2;1, SAT5, SAT1 | ATSERAT2;1 (SERINE ACETYLTRANSFERASE 2;1); serine O-acetyltransferase | chr1:20912378-20913322 FORWARDmoderately similar to ( 331) loc_os03g10050 12003.m06459 protein serine acetyltransferase 1, putative, expressed seq=cds; coord=1:24050823..24052281:1; parent_gene=GRMZM2G013430	5.12848	19.43	2.76152
GRMZM2G133053_T01	GRMZM2G133053	response to abiotic stimulus/response to cold	cell wall.cell wall proteins.AGPs.AGP	1.91192	1.61e-30	8.65e-29	weakly similar to ( 154) AT5G55730 | Symbols: FLA1 | FLA1 (FASCICLIN-LIKE ARAB INOGALACTAN 1) | chr5:22558375-22560392 REVERSEmoderately similar to ( 230) loc_os09g30010 12009.m06152 protein fasciclin-like arabinogalactan protein 8 precursor, putative, expressed seq=cds; coord=7:130426898..130428254:1; parent_gene=GRMZM2G133053	21.2346	71.1403	29.8096
GRMZM2G301908_T01	GRMZM2G301908	response to abiotic stimulus/response to coldresponse to wounding	cell wall.cell wall proteins.AGPs.AGP	3.50133	2.3e-20	6.42e-19	weakly similar to ( 146) AT5G55730 | Symbols: FLA1 | FLA1 (FASCICLIN-LIKE ARAB INOGALACTAN 1) | chr5:22558375-22560392 REVERSEmoderately similar to ( 236) loc_os08g38270 12008.m07812 protein fasciclin-like arabinogalactan protein 10 precursor, putative, expressed seq=cds; coord=4:197674970..197676500:1; parent_gene=GRMZM2G301908	1.14384	11.5101	13.3688
GRMZM2G403276_T01	GRMZM2G403276	response to wounding	cell wall.cell wall proteins.AGPs.AGP	2.55234	3.62e-09	3.45e-08	weakly similar to ( 154) AT5G55730 | Symbols: FLA1 | FLA1 (FASCICLIN-LIKE ARAB INOGALACTAN 1) | chr5:22558375-22560392 REVERSEmoderately similar to ( 231) loc_os09g30010 12009.m06152 protein fasciclin-like arabinogalactan protein 8 precursor, putative, expressed seq=cds; coord=2:188652134..188653299:1; parent_gene=GRMZM2G403276	1.63843	8.54221	2.76436
GRMZM2G001514_T01	GRMZM2G001514	response to wounding	cell wall.cell wall proteins.AGPs.AGP	2.51797	2.65e-74	8.59e-72	weakly similar to ( 102) AT5G44130 | Symbols: FLA13 | FLA13 (FASCICLIN-LIKE ARABINOGALACTAN PROTEIN 13 PRECURSOR) | chr5:17761128-17761871 FORWARDweakly similar to ( 189) loc_os05g48900 12005.m08961 protein fasciclin-like arabinogalactan protein 7 precursor, putative, expressed seq=cds; coord=8:69592559..69594672:1; parent_gene=GRMZM2G001514	34.6417	176.592	9.22451
GRMZM2G037411_T01	GRMZM2G037411	response to wounding	cell wall.pectin*esterases.PME	1.19708	2.38e-07	1.75e-06	moderately similar to ( 350) AT5G55590 | Symbols: QRT1 | QRT1 (QUARTET 1); pectinesterase | chr5:22519911-22521699 FORWARDweakly similar to ( 169) PME3_CITSI Pectinesterase-3 precursor (EC 3.1.1.11) (Pectin methylesterase 3) (PE 3) - Citrus sinensis (Sweet orange)highly similar to ( 565) loc_os07g41650 12007.m08401 protein pectinesterase VGDH2 precursor, putative, expressed seq=cds; coord=7:16482…	8.3737	17.115	1.12344
GRMZM2G008593_T01	GRMZM2G008593	response to wounding	cell wall.pectin*esterases.PME	2.20888	3.1e-23	1.04e-21	moderately similar to ( 429) AT3G49220 | Symbols: | pectinesterase family protein | chr3:18249840-18253647 FORWARDmoderately similar to ( 353) PME_PRUPE Pectinesterase PPE8B precursor (EC 3.1.1.11) (Pectin methylesterase) (PE) - Prunus persica (Peach)highly similar to ( 552) loc_os02g18650 12002.m07108 protein pectinesterase-2 precursor, putative, expressed seq=cds; coord=5:129222210..129224687:-…	5.24119	21.5781	10.2799
GRMZM2G133986_T02	GRMZM2G133986	response to DNA damage stimulus	cell.cycle	-1.99355	1.95e-08	1.7e-07	moderately similar to ( 414) AT3G05480 | Symbols: ATRAD9, RAD9 | RAD9 | chr3:1585383-1588238 FORWARDhighly similar to ( 668) loc_os03g22450 12003.m07647 protein auxin response factor 75, putative, expressed seq=cds; coord=1:58364110..58368308:-1; parent_gene=GRMZM2G133986	8.36086	1.86668	22.6866
GRMZM2G133413_T01	GRMZM2G133413	response to wounding	cell.cycle	4.02161	3.51e-07	2.5e-06	weakly similar to ( 171) AT5G10440 | Symbols: CYCD4;2 | CYCD4;2 (cyclin d4;2); cyclin-dependent protein kinase | chr5:3280611-3282342 REVERSEmoderately similar to ( 294) loc_os08g37390 12008.m07725 protein cyclin delta-2, putative, expressed seq=cds; coord=1:200723661..200726916:1; parent_gene=GRMZM2G133413	0.152638	2.20375
GRMZM2G162725_T01	GRMZM2G162725	response to abiotic stimulus/response to cold	cell.vesicle transport	1.12464	2.31e-09	2.26e-08	highly similar to ( 706) AT4G01400 | Symbols: | FUNCTIONS IN: molecular_function unknown; INVOLVED IN: biological_process unknown; LOCATED IN: cellular_component unknown; EXPRESSED IN: 23 plant structures; EXPRESSED DURING: 15 growth stages; CONTAINS InterPro DOMAIN/s: Pentatricopeptide repeat (InterPro:IPR002885); BEST Arabidopsis thaliana protein match is: pentatricopeptide (PPR) repeat-contain…	9.15089	17.7179	26.9319
GRMZM2G131525_T01	GRMZM2G131525	response to oxidative stress/response to chemical stimulus	cell.vesicle transport	1.28478	2.12e-08	1.83e-07	moderately similar to ( 304) AT1G08560 | Symbols: SYP111, KN, ATSYP111 | SYP111 (SYNTAXIN OF PLANTS 111); SNAP receptor | chr1:2709778-2710710 REVERSEvery weakly similar to (81.6) PER1_ORYSA Peroxidase 1 precursor (EC 1.11.1.7) - Oryza sativa (Rice)moderately similar to ( 452) loc_os03g52650 12003.m10239 protein syntaxin-related protein KNOLLE, putative, expressed seq=cds; coord=1:273776421..2737…	3.61205	7.8225	17.2772
GRMZM2G093418_T01	GRMZM2G093418	response to abiotic stimulus/response to chemical stimulus	development.late embryogenesis abundant	5.48011	7.17e-10	7.45e-09	very weakly similar to (96.7) AT2G46150 | Symbols: | FUNCTIONS IN: molecular_function unknown; INVOLVED IN: biological_process unknown; LOCATED IN: plasma membrane; EXPRESSED IN: 15 plant structures; EXPRESSED DURING: 7 growth stages; CONTAINS InterPro DOMAIN/s: Harpin-induced 1 (InterPro:IPR010847); BEST Arabidopsis thaliana protein match is: unknown protein (TAIR:AT3G54200.1); Has 137 Blast hit…	0.179079	7.11013
GRMZM2G385182_T01	GRMZM2G385182	response to abiotic stimulus/response to cold	development.unspecified	-1.46084	4.73e-12	6.32e-11	highly similar to ( 603) AT4G00060 | Symbols: MEE44 | MEE44 (maternal effect embryo arrest 44); nucleotidyltransferase | chr4:23899-27996 FORWARDnearly identical (1482) loc_os06g45800 12006.m09108 protein PAP/25A associated domain containing protein, expressed seq=cds; coord=6:92978608..92992870:-1; parent_gene=GRMZM2G385182	10.2179	3.30474	14.5331
GRMZM2G029974_T01	GRMZM2G029974	response to DNA damage stimulus/response to abiotic stimulus/response to cold/response to wounding	DNA.repair	1.19071	9.63e-07	6.35e-06	moderately similar to ( 291) AT1G75230 | Symbols: | HhH-GPD base excision DNA repair family protein | chr1:28234444-28236452 FORWARDmoderately similar to ( 387) loc_os05g50290 12005.m09098 protein DNA-3-methyladenine glycosylase 1, putative, expressed seq=cds; coord=8:74131288..74133362:1; parent_gene=GRMZM2G029974	5.67754	11.5387	12.5823
GRMZM2G348956_T01	GRMZM2G348956	response to DNA damage stimulus	DNA.repair	-3.44215	2.58e-22	8.06e-21	highly similar to ( 617) AT1G65070 | Symbols: | DNA mismatch repair MutS family protein | chr1:24173132-24176244 REVERSEnearly identical (1203) loc_os04g58410 12004.m78926 protein mismatch repair ATPase, putative, expressed seq=cds; coord=2:1277292..1281626:-1; parent_gene=GRMZM2G348956	7.98718	0.652514	27.7504
AC190788.2_FGT005	AC190788.2	response to DNA damage stimulus	DNA.repair	-4.0024	1.18e-11	1.51e-10	moderately similar to ( 234) AT4G17380 | Symbols: MSH4, ATMSH4 | MSH4 (MUTS HOMOLOG 4); ATP binding / damaged DNA binding / mismatched DNA binding | chr4:9708742-9714068 FORWARDvery weakly similar to (86.3) MSH2_MAIZE DNA mismatch repair protein MSH2 (MUS1) - Zea mays (Maize)weakly similar to ( 140) loc_os07g30240 12007.m07295 protein mutS family domain IV containing protein seq=cds; coord=2:1996…	20.4104	1.13339	29.8801
GRMZM2G309109_T01	GRMZM2G309109	response to DNA damage stimulus	DNA.repair	-3.16467	1.68e-30	8.98e-29	highly similar to ( 609) AT5G54260 | Symbols: MRE11, ATMRE11 | MRE11 (meiotic recombination 11); endonuclease/ exonuclease/ hydrolase/ manganese ion binding / protein serine/threonine phosphatase | chr5:22032702-22037749 FORWARDhighly similar to ( 644) loc_os04g54340 12004.m10325 protein double-strand break repair protein MRE11, putative, expressed seq=cds; coord=4:29906148..29911916:1; parent_ge…	17.7185	1.75654
GRMZM2G069025_T01	GRMZM2G069025	response to DNA damage stimulus	DNA.repair	-2.22055	2.43e-20	6.75e-19	moderately similar to ( 496) AT1G01880 | Symbols: | DNA repair protein, putative | chr1:306558-308991 REVERSEhighly similar to ( 882) loc_os09g35000 12009.m06500 protein single strand DNA repair-like protein, putative, expressed seq=cds; coord=7:141119066..141124031:1; parent_gene=GRMZM2G069025	17.1288	3.26626	18.583
GRMZM2G133952_T01	GRMZM2G133952	response to DNA damage stimulus	DNA.repair	-1.99259	4.28e-23	1.42e-21	highly similar to ( 951) AT4G09140 | Symbols: ATMLH1, MLH1 | MLH1 (MUTL-HOMOLOGUE 1); protein binding, bridging | chr4:5817107-5821035 REVERSEnearly identical (1217) loc_os01g72880 12001.m42511 protein MUTL protein homolog 1, putative, expressed seq=cds; coord=8:157401584..157408704:-1; parent_gene=GRMZM2G133952	26.1935	5.85951	30.9133
GRMZM2G055464_T01	GRMZM2G055464	response to DNA damage stimulus	DNA.repair	-1.94923	1.47e-06	9.38e-06	weakly similar to ( 195) AT1G07745 | Symbols: ATRAD51D, RAD51D, SSN1 | RAD51D (ARABIDOPSIS HOMOLOG OF RAD51 D); ATP binding / DNA binding / DNA-dependent ATPase | chr1:2400797-2402492 REVERSEmoderately similar to ( 291) loc_os09g01680 12009.m22038 protein DNA repair protein RAD51 homolog 4, putative, expressed seq=cds; coord=7:170019823..170025928:-1; parent_gene=GRMZM2G055464	7.07099	1.62642	8.0002
GRMZM2G360873_T01	GRMZM2G360873	response to DNA damage stimulus	DNA.repair	-1.84062	9.9e-20	2.63e-18	nearly identical (1362) AT3G24320 | Symbols: MSH1, CHM1, ATMSH1, CHM | MSH1 (MUTL PROTEIN HOMOLOG 1); ATP binding / catalytic/ damaged DNA binding / mismatched DNA binding / nuclease | chr3:8823229-8829571 REVERSEnearly identical (1891) loc_os04g42784 12004.m09243 protein DNA mismatch repair protein, putative, expressed seq=cds; coord=10:129251135..129290754:-1; parent_gene=GRMZM2G360873	14.5723	3.61933	36.8596
GRMZM2G356935_T01	GRMZM2G356935	response to DNA damage stimulus	DNA.repair	-1.74164	1.59e-06	1.02e-05	highly similar to ( 523) AT4G02460 | Symbols: PMS1 | PMS1 (POSTMEIOTIC SEGREGATION 1); ATP binding / mismatched DNA binding | chr4:1076306-1080510 REVERSEhighly similar to ( 702) loc_os02g37920 12002.m08880 protein ATP binding protein, putative, expressed seq=cds; coord=4:129013614..129015920:-1; parent_gene=GRMZM2G356935	6.64304	1.7658	21.1911
GRMZM2G388915_T01	GRMZM2G388915	response to DNA damage stimulus	DNA.repair	-1.5069	1.51e-12	2.12e-11	highly similar to ( 834) AT3G28030 | Symbols: UVH3, UVR1 | UVH3 (ULTRAVIOLET HYPERSENSITIVE 3); DNA binding / catalytic/ endonuclease/ nuclease/ single-stranded DNA binding | chr3:10424321-10431178 FORWARDvery weakly similar to (80.1) FEN1B_ORYSA Flap endonuclease 1b (EC 3.1.-.-) (OsFEN-1b) - Oryza sativa (Rice)nearly identical (1561) loc_os03g10780 12003.m06530 protein DNA-repair protein UVH3, p…	9.69894	3.04234	18.5498
GRMZM2G123587_T01	GRMZM2G123587	response to DNA damage stimulus	DNA.repair	-1.18424	2.71e-15	5e-14	highly similar to ( 651) AT5G04560 | Symbols: DME | DME (DEMETER); DNA N-glycosylase/ DNA-(apurinic or apyrimidinic site) lyase | chr5:1309786-1318091 FORWARDnearly identical (1459) loc_os01g11900 12001.m07806 protein hhH-GPD superfamily base excision DNA repair protein, expressed seq=cds; coord=5:161861555..161907984:-1; parent_gene=GRMZM2G123587	23.9595	9.37457	32.5648
GRMZM5G828460_T01	GRMZM5G828460	response to DNA damage stimulus	DNA.repair	-1.10181	3.34e-07	2.4e-06	moderately similar to ( 380) AT2G36490 | Symbols: DML1, ROS1 | DML1 (DEMETER-LIKE 1); DNA N-glycosylase/ DNA-(apurinic or apyrimidinic site) lyase/ protein binding | chr2:15308259-15314272 REVERSEhighly similar to ( 746) loc_os02g29380 12002.m08082 protein expressed protein seq=cds; coord=5:162236963..162242599:1; parent_gene=GRMZM5G828460	16.1852	6.7149	42.5151
GRMZM2G114592_T01	GRMZM2G114592	response to DNA damage stimulus	DNA.repair	1.06516	4.48e-09	4.23e-08	moderately similar to ( 283) AT1G19480 | Symbols: | HhH-GPD base excision DNA repair family protein | chr1:6744520-6745653 FORWARDmoderately similar to ( 404) loc_os05g50290 12005.m09098 protein DNA-3-methyladenine glycosylase 1, putative, expressed seq=cds; coord=6:166165400..166166813:1; parent_gene=GRMZM2G114592	19.2528	35.8973	42.3991
GRMZM2G132303_T01	GRMZM2G132303	response to DNA damage stimulus	DNA.repair	1.29221	6.11e-19	1.54e-17	very weakly similar to (99.8) loc_os01g58550 12001.m150749 protein DNA-3-methyladenine glycosylase I, putative, expressed seq=cds; coord=8:171607444..171609770:-1; parent_gene=GRMZM2G132303	33.2535	72.3161	45.1927
GRMZM2G143535_T01	GRMZM2G143535	response to DNA damage stimulus	DNA.repair	2.15861	4.28e-09	4.06e-08	moderately similar to ( 340) AT3G12040 | Symbols: | DNA-3-methyladenine glycosylase (MAG) | chr3:3835349-3836781 REVERSEmoderately similar to ( 404) loc_os02g53430 12002.m10372 protein DNA-3-methyladenine glycosylase, putative, expressed seq=cds; coord=5:211439946..211442840:-1; parent_gene=GRMZM2G143535	2.50711	9.95418	4.82217
GRMZM2G367857_T01	GRMZM2G367857	response to DNA damage stimulus	DNA.synthesis/chromatin structure	-1.77322	3.04e-14	5.08e-13	moderately similar to ( 383) AT5G44750 | Symbols: REV1, ATREV1 | REV1; DNA-directed DNA polymerase | chr5:18052669-18059581 FORWARDhighly similar to ( 751) loc_os06g47580 12006.m091772 protein REV1, putative, expressed seq=cds; coord=5:52091692..52100419:1; parent_gene=GRMZM2G367857	17.9804	4.68716	50.055
GRMZM2G009326_T02	GRMZM2G009326	response to abiotic stimulus/response to cold	hormone metabolism.abscisic acid.induced-regulated-responsive-activated	-1.96774	9.57e-07	6.32e-06	weakly similar to ( 119) loc_os03g08860 12003.m35053 protein FIP1, putative, expressed seq=cds; coord=1:18697097..18698009:1; parent_gene=GRMZM2G009326	14.7445	3.35619	2.01705
GRMZM2G033413_T01	GRMZM2G033413	response to abiotic stimulus/response to cold	hormone metabolism.abscisic acid.signal transduction	2.47061	5.62e-13	8.25e-12	weakly similar to ( 142) AT4G34000 | Symbols: ABF3, DPBF5 | ABF3 (ABSCISIC ACID RESPONSIVE ELEMENTS-BINDING FACTOR 3); DNA binding / protein binding / transcription activator/ transcription factor | chr4:16296008-16297594 FORWARDmoderately similar to ( 356) loc_os06g10880 12006.m091641 protein bZIP transcription factor family protein, expressed seq=cds; coord=9:8228733..8238999:-1; parent_gene=GR…	2.19134	10.8097	36.7134
GRMZM2G154578_T01	GRMZM2G154578	response to abiotic stimulus/response to cold	hormone metabolism.auxin.induced-regulated-responsive-activated	2.81092	1.11e-54	1.69e-52	very weakly similar to (82.4) AT3G07390 | Symbols: AIR12 | AIR12; extracellular matrix structural constituent | chr3:2365452-2366273 FORWARDweakly similar to ( 171) loc_os08g41290 12008.m08107 protein AIR12, putative, expressed seq=cds; coord=4:42919325..42920272:1; parent_gene=GRMZM2G154578	19.6199	122.299
GRMZM2G098643_T01	GRMZM2G098643	response to abiotic stimulus/response to cold	hormone metabolism.auxin.signal transduction	-1.11179	3.14e-10	3.41e-09	highly similar to ( 791) AT1G73590 | Symbols: PIN1, ATPIN1 | PIN1 (PIN-FORMED 1); transporter | chr1:27659772-27662876 FORWARDhighly similar to ( 987) PIN1C_ORYSA Probable auxin efflux carrier component 1c (OsPIN1c) - Oryza sativa (Rice)highly similar to ( 987) loc_os06g12610 12006.m05977 protein auxin efflux carrier component 1c, putative, expressed seq=cds; coord=9:3650766..3654174:1; parent_ge…	26.4301	10.8984	3.7056
GRMZM2G079653_T01	GRMZM2G079653	response to abiotic stimulus/response to cold	hormone metabolism.ethylene.signal transduction	1.47698	1.63e-11	2.06e-10	very weakly similar to (95.5) AT1G50640 | Symbols: ERF3, ATERF3 | ERF3 (ETHYLENE RESPONSIVE ELEMENT BINDING FACTOR 3); DNA binding / protein binding / transcription factor/ transcription repressor | chr1:18757602-18758279 REVERSEvery weakly similar to (95.1) ERF3_TOBAC Ethylene-responsive transcription factor 3 (Ethylene-responsive element-binding factor 3 homolog) (EREBP-5) (NtERF5) - Nicotiana …	12.1911	30.1982	13.7931
GRMZM2G474326_T01	GRMZM2G474326	response to abiotic stimulus/response to cold	hormone metabolism.ethylene.signal transduction	2.60544	3.31e-08	2.78e-07	very weakly similar to (94.4) AT4G17500 | Symbols: ATERF-1 | ATERF-1 (ETHYLENE RESPONSIVE ELEMENT BINDING FACTOR 1); DNA binding / transcription activator/ transcription factor | chr4:9759405-9760211 FORWARDvery weakly similar to (90.5) ERF1_TOBAC Ethylene-responsive transcription factor 1 (Ethylene-responsive element-binding factor 1) (EREBP-1) (NtERF1) - Nicotiana tabacum (Common tobacco)weakly…	1.38556	7.50167	1.1221
GRMZM2G034534_T01	GRMZM2G034534	response to wounding	lipid metabolism.exotics (steroids, squalene etc).phosphatidylcholinesterol O-acyltransferase	-1.92021	1.87e-30	1e-28	moderately similar to ( 248) AT1G27480 | Symbols: | lecithin:cholesterol acyltransferase family protein / LACT family protein | chr1:9544607-9546168 FORWARDmoderately similar to ( 498) loc_os02g37654 12002.m08852 protein 1-O-acylceramide synthase precursor, putative, expressed seq=cds; coord=3:18076915..18078951:1; parent_gene=GRMZM2G034534	62.5193	14.6795
GRMZM2G113332_T01	GRMZM2G113332	response to abiotic stimulus/response to cold/response to chemical stimulus	metal handling.binding, chelation and storage	1.25058	1e-10	1.16e-09	weakly similar to ( 114) AT3G56240 | Symbols: CCH | CCH (COPPER CHAPERONE); copper chaperone | chr3:20863460-20864402 REVERSEweakly similar to ( 119) loc_os02g32814 12002.m08373 protein heavy metal-associated domain containing protein, expressed seq=cds; coord=5:168671806..168673715:1; parent_gene=GRMZM2G113332	16.9662	35.9142	18.8539
AC233850.1_FGT002	AC233850.1	response to abiotic stimulus/response to cold	misc.invertase/pectin methylesterase inhibitor family protein	1.08074	7.47e-09	6.9e-08	weakly similar to ( 111) loc_os02g33380 12002.m08431 protein pectinesterase inhibitor domain containing protein, expressed seq=cds; coord=5:169817842..169818381:1; parent_gene=AC233850.1_FG002	45.4018	85.13	14.3255
GRMZM2G089982_T01	GRMZM2G089982	response to oxidative stress/response to chemical stimulus	misc.peroxidases	5.52277	2.56e-83	1.08e-80	moderately similar to ( 442) AT5G66390 | Symbols: | peroxidase 72 (PER72) (P72) (PRXR8) | chr5:26516063-26517329 REVERSEmoderately similar to ( 310) PER1_ARAHY Cationic peroxidase 1 precursor (EC 1.11.1.7) (PNPC1) - Arachis hypogaea (Peanut)highly similar to ( 583) loc_os01g15830 12001.m08181 protein peroxidase 72 precursor, putative, expressed seq=cds; coord=3:40528179..40530723:-1; parent_gene=…	1.04239	42.527	5.37207
GRMZM2G408963_T01	GRMZM2G408963	response to oxidative stress/response to chemical stimulus	misc.peroxidases	1.5971	6.21e-23	2.04e-21	moderately similar to ( 270) AT5G47000 | Symbols: | peroxidase, putative | chr5:19069171-19070175 REVERSEweakly similar to ( 170) PER2_ARAHY Cationic peroxidase 2 precursor (EC 1.11.1.7) (PNPC2) - Arachis hypogaea (Peanut)moderately similar to ( 428) loc_os04g39100 12004.m08899 protein peroxidase 65 precursor, putative, expressed seq=cds; coord=2:40676283..40677846:1; parent_gene=GRMZM2G408963	22.8012	61.4798	48.9463
GRMZM2G108153_T01	GRMZM2G108153	response to oxidative stress/response to chemical stimulus	misc.peroxidases	3.34585	1.22e-82	5.04e-80	moderately similar to ( 217) AT1G71695 | Symbols: | peroxidase 12 (PER12) (P12) (PRXR6) | chr1:26964359-26966557 FORWARDmoderately similar to ( 206) PER1_WHEAT Peroxidase precursor (EC 1.11.1.7) (WP2) - Triticum aestivum (Wheat)moderately similar to ( 346) loc_os04g59160 12004.m10793 protein peroxidase 12 precursor, putative, expressed seq=cds; coord=2:24834408..24836108:-1; parent_gene=GRMZM2G10…	10.108	91.3233
GRMZM2G150134_T01	GRMZM2G150134	response to oxidative stress/response to chemical stimulus	misc.peroxidases	3.56562	3.21e-54	4.81e-52	moderately similar to ( 259) AT3G17070 | Symbols: | peroxidase, putative | chr3:5821048-5823165 FORWARDweakly similar to ( 165) PER1_ORYSA Peroxidase 1 precursor (EC 1.11.1.7) - Oryza sativa (Rice)moderately similar to ( 393) loc_os05g14260 12005.m05837 protein peroxidase 29 precursor, putative, expressed seq=cds; coord=8:110686795..110688334:1; parent_gene=GRMZM2G150134	4.53157	47.6346
GRMZM2G177792_T01	GRMZM2G177792	response to oxidative stress/response to chemical stimulus	misc.peroxidases	-3.69507	1.13e-177	2.85e-174	moderately similar to ( 259) AT1G05260 | Symbols: RCI3, RCI3A | RCI3 (RARE COLD INDUCIBLE GENE 3); peroxidase | chr1:1529827-1531271 FORWARDmoderately similar to ( 249) PER2_ARAHY Cationic peroxidase 2 precursor (EC 1.11.1.7) (PNPC2) - Arachis hypogaea (Peanut)moderately similar to ( 455) loc_os05g04490 12005.m04982 protein peroxidase 1 precursor, putative, expressed seq=cds; coord=10:86284199..8…	1864.26	128.178
AC205413.4_FGT001	AC205413.4	response to oxidative stress/response to chemical stimulus	misc.peroxidases	-3.51871	2.89e-10	3.16e-09	moderately similar to ( 279) AT1G05260 | Symbols: RCI3, RCI3A | RCI3 (RARE COLD INDUCIBLE GENE 3); peroxidase | chr1:1529827-1531271 FORWARDmoderately similar to ( 260) PER1_ORYSA Peroxidase 1 precursor (EC 1.11.1.7) - Oryza sativa (Rice)highly similar to ( 502) loc_os05g04490 12005.m04982 protein peroxidase 1 precursor, putative, expressed seq=cds; coord=10:86099715..86100737:-1; parent_gene=AC2…	9.64856	0.748944
GRMZM2G419953_T01	GRMZM2G419953	response to oxidative stress/response to chemical stimulus	misc.peroxidases	3.62122	3.82e-20	1.04e-18	moderately similar to ( 288) AT1G05260 | Symbols: RCI3, RCI3A | RCI3 (RARE COLD INDUCIBLE GENE 3); peroxidase | chr1:1529827-1531271 FORWARDmoderately similar to ( 235) PER1_ORYSA Peroxidase 1 precursor (EC 1.11.1.7) - Oryza sativa (Rice)moderately similar to ( 408) loc_os02g06630 12002.m06011 protein peroxidase 39 precursor, putative, expressed seq=cds; coord=4:236885902..236889531:1; parent_gen…	1.00442	10.9971	1.83023
GRMZM2G442008_T01	GRMZM2G442008	response to oxidative stress/response to chemical stimulus	misc.peroxidases	1.37931	1.02e-13	1.61e-12	moderately similar to ( 362) AT5G47000 | Symbols: | peroxidase, putative | chr5:19069171-19070175 REVERSEmoderately similar to ( 223) PER2_ARAHY Cationic peroxidase 2 precursor (EC 1.11.1.7) (PNPC2) - Arachis hypogaea (Peanut)highly similar to ( 513) loc_os02g50770 12002.m10111 protein peroxidase 65 precursor, putative, expressed seq=cds; coord=5:206017966..206019560:1; parent_gene=GRMZM2G442008	14.373	33.2648
GRMZM2G103342_T01	GRMZM2G103342	response to oxidative stress/response to chemical stimulus	misc.peroxidases	3.79897	6.96e-61	1.36e-58	moderately similar to ( 285) AT1G71695 | Symbols: | peroxidase 12 (PER12) (P12) (PRXR6) | chr1:26964359-26966557 FORWARDweakly similar to ( 191) PER1_SORBI Cationic peroxidase SPC4 precursor (EC 1.11.1.7) (Fragment) - Sorghum bicolor (Sorghum) (Sorghum vulgare)moderately similar to ( 379) loc_os01g73170 12001.m13346 protein peroxidase 12 precursor, putative, expressed seq=cds; coord=3:146522696..…	2.62832	32.5261	1.44438
AC230013.2_FGT002	AC230013.2	response to oxidative stress/response to chemical stimulus	misc.peroxidases	1.83502	6.45e-07	4.41e-06	moderately similar to ( 342) AT2G34060 | Symbols: | peroxidase, putative | chr2:14384914-14386530 FORWARDmoderately similar to ( 211) PER2_ARAHY Cationic peroxidase 2 precursor (EC 1.11.1.7) (PNPC2) - Arachis hypogaea (Peanut)moderately similar to ( 259) loc_os06g13050 12006.m06020 protein peroxidase family protein, expressed seq=cds; coord=3:210670732..210673561:-1; parent_gene=AC230013.2_FG002	3.12996	9.92803	3.60058
GRMZM2G451097_T01	GRMZM2G451097	response to oxidative stress/response to chemical stimulus	misc.peroxidases	-1.25877	5.4e-07	3.74e-06	moderately similar to ( 238) AT4G11290 | Symbols: | peroxidase, putative | chr4:6869993-6871476 FORWARDmoderately similar to ( 211) PERX_NICSY Lignin-forming anionic peroxidase precursor (EC 1.11.1.7) - Nicotiana sylvestris (Wood tobacco)moderately similar to ( 369) loc_os07g44460 12007.m08667 protein peroxidase 66 precursor, putative seq=cds; coord=7:169031101..169033108:-1; parent_gene=GRMZM2G4…	13.7844	5.11872
GRMZM2G022828_T01	GRMZM2G022828	response to oxidative stress/response to chemical stimulus	misc.peroxidases	-4.73471	4.39e-36	3.16e-34	very weakly similar to (96.3) AT1G05260 | Symbols: RCI3, RCI3A | RCI3 (RARE COLD INDUCIBLE GENE 3); peroxidase | chr1:1529827-1531271 FORWARDvery weakly similar to (90.1) PER1_ORYSA Peroxidase 1 precursor (EC 1.11.1.7) - Oryza sativa (Rice)weakly similar to ( 191) loc_os05g04490 12005.m04982 protein peroxidase 1 precursor, putative, expressed seq=cds; coord=10:85950692..85951201:-1; parent_gene=G…	67.4264	2.25344
GRMZM2G107228_T01	GRMZM2G107228	response to oxidative stress/response to chemical stimulus	misc.peroxidases	2.81108	8.58e-15	1.51e-13	moderately similar to ( 250) AT5G05340 | Symbols: | peroxidase, putative | chr5:1579142-1580819 REVERSEmoderately similar to ( 251) PER2_ORYSA Peroxidase 2 precursor (EC 1.11.1.7) - Oryza sativa (Rice)highly similar to ( 502) loc_os01g22336 12001.m08715 protein peroxidase 1 precursor, putative, expressed seq=cds; coord=3:59325157..59327502:1; parent_gene=GRMZM2G107228	1.58409	9.88684	1.30293
GRMZM2G146015_T01	GRMZM2G146015	response to abiotic stimulus/response to cold	misc.plastocyanin-like	1.0395	4.42e-15	7.93e-14	very weakly similar to (84.3) AT2G27035 | Symbols: | plastocyanin-like domain-containing protein | chr2:11535670-11536251 FORWARDweakly similar to ( 183) loc_os03g55120 12003.m10428 protein blue copper protein precursor, putative, expressed seq=cds; coord=1:278373114..278374335:-1; parent_gene=GRMZM2G146015	110.084	201.163	80.9424
GRMZM2G077769_T01	GRMZM2G077769	response to abiotic stimulus/response to cold	misc.plastocyanin-like	1.22656	2.28e-08	1.96e-07	weakly similar to ( 122) AT1G64640 | Symbols: | plastocyanin-like domain-containing protein | chr1:24022482-24023151 REVERSEweakly similar to ( 193) loc_os03g02400 12003.m05782 protein early nodulin-like protein 1 precursor, putative, expressed seq=cds; coord=1:3280273..3281467:1; parent_gene=GRMZM2G077769	13.2308	27.5115	30.7183
GRMZM2G105682_T01	GRMZM2G105682	response to abiotic stimulus/response to cold	misc.plastocyanin-like	2.18139	1.82e-09	1.81e-08	very weakly similar to (95.5) AT2G32300 | Symbols: UCC1 | UCC1 (UCLACYANIN 1); copper ion binding / electron carrier | chr2:13722510-13723464 FORWARDweakly similar to ( 137) loc_os07g01440 12007.m04624 protein uclacyanin-2 precursor, putative, expressed seq=cds; coord=7:1137268..1138555:1; parent_gene=GRMZM2G105682	2.78081	11.2082
GRMZM5G850455_T02	GRMZM5G850455	response to abiotic stimulus/response to cold	misc.protease inhibitor/seed storage/lipid transfer protein (LTP) family protein	2.57278	6.15e-32	3.55e-30	weakly similar to ( 134) AT2G44300 | Symbols: | lipid transfer protein-related | chr2:18307468-18308286 REVERSEmoderately similar to ( 252) loc_os03g07100 12003.m06227 protein lipid transfer protein, putative, expressed seq=cds; coord=1:14103040..14104361:1; parent_gene=GRMZM5G850455	9.03696	47.8403	15.5521
GRMZM2G125668_T01	GRMZM2G125668	response to abiotic stimulus/response to cold	mitochondrial electron transport / ATP synthesis.NADH-DH.complex I.carbonic anhydrase	1.13815	1.51e-12	2.12e-11	moderately similar to ( 356) AT3G48680 | Symbols: GAMMA CAL2 | GAMMA CAL2 (GAMMA CARBONIC ANHYDRASE-LIKE 2); transferase | chr3:18035107-18036773 FORWARDmoderately similar to ( 414) loc_os02g30460 12002.m08189 protein mitochondrial NADH ubiquinone oxidoreductase 29 kDa subunit, putative, expressed seq=cds; coord=4:103105009..103132824:-1; parent_gene=GRMZM2G125668	37.9746	74.3326	65.0562
GRMZM2G169372_T04	GRMZM2G169372	response to abiotic stimulus/response to chemical stimulus	not assigned.unknown	-3.08689	4.23e-07	2.98e-06	seq=cds; coord=1:259304543..259305581:-1; parent_gene=GRMZM2G169372	7.9861	0.835518	1.93324
GRMZM2G448511_T01	GRMZM2G448511	response to abiotic stimulus/response to chemical stimulus	not assigned.unknown	-2.36522	1.05e-15	2.01e-14	seq=cds; coord=5:15573934..15574756:-1; parent_gene=GRMZM2G448511	32.3045	5.58569
GRMZM2G079440_T01	GRMZM2G079440	response to abiotic stimulus/response to chemical stimulus	not assigned.unknown	-1.4781	1.5e-28	7.32e-27	weakly similar to ( 124) DHN1_MAIZE Dehydrin DHN1 (M3) (RAB-17 protein) - Zea mays (Maize) seq=cds; coord=6:137142553..137144384:-1; parent_gene=GRMZM2G079440	195.954	62.3549	5.6515
GRMZM2G389903_T01	GRMZM2G389903	response to abiotic stimulus/response to cold	not assigned.unknown	2.98637	7.64e-09	7.03e-08	seq=cds; coord=6:157043933..157044497:1; parent_gene=GRMZM2G389903	1.9724	13.8995
GRMZM2G369839_T01	GRMZM2G369839	response to abiotic stimulus/response to cold	not assigned.unknown	3.14296	7.88e-135	9.06e-132	seq=cds; coord=3:225780411..225781334:-1; parent_gene=GRMZM2G369839	190.042	1492.12	48.4881
GRMZM2G059887_T01	GRMZM2G059887	response to abiotic stimulus/response to cold	not assigned.unknown	2.15315	7.72e-10	7.99e-09	seq=cds; coord=5:138636469..138638958:-1; parent_gene=GRMZM2G059887	5.12765	20.2706	8.89852
GRMZM2G059887_T03	GRMZM2G059887	response to abiotic stimulus/response to cold	not assigned.unknown	-3.53486	6.5e-08	5.21e-07	seq=cds; coord=5:138636486..138638958:-1; parent_gene=GRMZM2G059887	3.02566	0.232361	7.16855
GRMZM2G002420_T02	GRMZM2G002420	response to abiotic stimulus/response to cold	not assigned.unknown	1.45064	2.55e-11	3.14e-10	seq=cds; coord=4:223435945..223439292:-1; parent_gene=GRMZM2G002420	17.0227	41.4272	40.1436
GRMZM2G063156_T01	GRMZM2G063156	response to abiotic stimulus/response to cold	not assigned.unknown	-1.83899	8.52e-08	6.74e-07	seq=cds; coord=3:40445972..40446881:-1; parent_gene=GRMZM2G063156	21.5077	5.33545	2.69352
GRMZM2G044194_T01	GRMZM2G044194	response to abiotic stimulus/response to cold	not assigned.unknown	1.0344	1.53e-15	2.9e-14	seq=cds; coord=7:3022266..3023029:-1; parent_gene=GRMZM2G044194	229.22	416.191	6.96379
GRMZM2G167649_T01	GRMZM2G167649	response to abiotic stimulus/response to cold	not assigned.unknown	1.61346	5.59e-21	1.61e-19	seq=cds; coord=1:139790127..139791962:-1; parent_gene=GRMZM2G167649	15.3478	41.8347	34.2338
GRMZM2G355316_T01	GRMZM2G355316	response to abiotic stimulus/response to cold	not assigned.unknown	1.85154	7.71e-33	4.64e-31	seq=cds; coord=7:128896463..128897259:-1; parent_gene=GRMZM2G355316	49.9376	160.3	61.6743
GRMZM2G081529_T01	GRMZM2G081529	response to abiotic stimulus/response to cold	not assigned.unknown	2.06539	1.44e-11	1.83e-10	seq=cds; coord=2:187881831..187882645:-1; parent_gene=GRMZM2G081529	6.05551	22.5621	14.8309
GRMZM2G175243_T01	GRMZM2G175243	response to abiotic stimulus/response to cold	not assigned.unknown	32.244	1.8e-07	1.35e-06	seq=cds; coord=9:36386035..36386792:1; parent_gene=GRMZM2G175243		5.55928	4.67753
GRMZM2G078876_T01	GRMZM2G078876	response to abiotic stimulus/response to cold	not assigned.unknown	2.7639	2.84e-106	1.94e-103	very weakly similar to (86.3) loc_os03g26820 12003.m08014 protein xylogen protein 1, putative, expressed seq=cds; coord=1:66023613..66026784:-1; parent_gene=GRMZM2G078876	144.764	878.127	246.194
GRMZM2G313104_T01	GRMZM2G313104	response to abiotic stimulus/response to cold	not assigned.unknown	5.19201	6.13e-16	1.2e-14	seq=cds; coord=1:72040893..72042056:-1; parent_gene=GRMZM2G313104	0.273542	8.88599
GRMZM2G026922_T01	GRMZM2G026922	response to abiotic stimulus/response to cold	not assigned.unknown	-1.9269	1.38e-19	3.6e-18	very weakly similar to (98.6) AT4G25170 | Symbols: | FUNCTIONS IN: molecular_function unknown; INVOLVED IN: biological_process unknown; EXPRESSED IN: 23 plant structures; EXPRESSED DURING: 13 growth stages; CONTAINS InterPro DOMAIN/s: Uncharacterised conserved protein UCP012943 (InterPro:IPR016606); BEST Arabidopsis thaliana protein match is: unknown protein (TAIR:AT5G61490.1). | chr4:12909740-12…	18.5904	4.33784	5.98797
GRMZM2G127453_T02	GRMZM2G127453	response to abiotic stimulus/response to cold	not assigned.unknown	-1.68922	4.71e-07	3.29e-06	weakly similar to ( 124) AT2G36835 | Symbols: | unknown protein | chr2:15449839-15451307 REVERSEweakly similar to ( 189) loc_os01g56890 12001.m43219 protein expressed protein seq=cds; coord=3:191679050..191681974:1; parent_gene=GRMZM2G127453	6.55093	1.80623	9.87834
GRMZM2G428356_T01	GRMZM2G428356	response to abiotic stimulus/response to cold	not assigned.unknown	-1.16548	1.27e-08	1.14e-07	weakly similar to ( 103) loc_os01g29740 12001.m42556 protein expressed protein seq=cds; coord=5:26594312..26597484:-1; parent_gene=GRMZM2G428356	38.7707	15.3781	80.3654
GRMZM2G159142_T01	GRMZM2G159142	response to abiotic stimulus/response to cold	not assigned.unknown	-1.00243	7.69e-07	5.17e-06	moderately similar to ( 396) AT1G33230 | Symbols: | FUNCTIONS IN: molecular_function unknown; INVOLVED IN: biological_process unknown; LOCATED IN: integral to membrane; EXPRESSED IN: 22 plant structures; EXPRESSED DURING: 13 growth stages; CONTAINS InterPro DOMAIN/s: TMPIT-like (InterPro:IPR012926); BEST Arabidopsis thaliana protein match is: unknown protein (TAIR:AT4G10430.3); Has 198 Blast hits…	29.7803	13.2005	42.5005
GRMZM2G393671_T01	GRMZM2G393671	response to abiotic stimulus/response to cold	not assigned.unknown	1.01678	7.27e-13	1.06e-11	weakly similar to ( 104) AT2G31670 | Symbols: | FUNCTIONS IN: molecular_function unknown; INVOLVED IN: biological_process unknown; LOCATED IN: peroxisome, chloroplast stroma, chloroplast; EXPRESSED IN: 22 plant structures; EXPRESSED DURING: 16 growth stages; CONTAINS InterPro DOMAIN/s: Stress responsive alpha-beta barrel (InterPro:IPR013097), Dimeric alpha-beta barrel (InterPro:IPR011008); BEST A…	52.7092	94.6734	83.8955
GRMZM5G851485_T01	GRMZM5G851485	response to abiotic stimulus/response to cold	not assigned.unknown	1.03641	3.2e-10	3.47e-09	seq=cds; coord=1:50864166..50865478:1; parent_gene=GRMZM5G851485	29.8275	54.4138	32.1588
GRMZM2G542272_T01	GRMZM2G542272	response to abiotic stimulus/response to cold	not assigned.unknown	1.16503	1.01e-13	1.59e-12	seq=cds; coord=5:203402576..203403244:1; parent_gene=GRMZM2G542272	69.4869	138.575	2.6499
GRMZM2G467356_T01	GRMZM2G467356	response to abiotic stimulus/response to cold	not assigned.unknown	1.18653	1.78e-17	3.95e-16	weakly similar to ( 183) AT3G07480 | Symbols: | electron carrier/ iron-sulfur cluster binding | chr3:2389026-2389505 FORWARDmoderately similar to ( 257) loc_os09g33950 12009.m06444 protein ferredoxin, putative, expressed seq=cds; coord=7:139138682..139139799:-1; parent_gene=GRMZM2G467356	74.6167	150.938	104.799
GRMZM2G081536_T01	GRMZM2G081536	response to abiotic stimulus/response to cold	not assigned.unknown	1.20269	4.11e-22	1.27e-20	seq=cds; coord=8:137766571..137767203:1; parent_gene=GRMZM2G081536	340.786	695.06	93.4383
GRMZM2G477314_T01	GRMZM2G477314	response to abiotic stimulus/response to cold	not assigned.unknown	1.2046	2.39e-18	5.75e-17	moderately similar to ( 226) AT1G10150 | Symbols: | carbohydrate binding | chr1:3326160-3327404 FORWARDmoderately similar to ( 356) loc_os03g56000 12003.m10510 protein CF9, putative seq=cds; coord=1:281320337..281321954:1; parent_gene=GRMZM2G477314	55.3957	113.292	17.431
GRMZM2G046849_T01	GRMZM2G046849	response to abiotic stimulus/response to cold	not assigned.unknown	1.2804	3.16e-09	3.05e-08	moderately similar to ( 414) AT3G17800 | Symbols: | mRNA level of the MEB5.2 gene (At3g17800) remains unchanged after cutting the inflorescence stem | chr3:6091248-6092873 REVERSEhighly similar to ( 536) loc_os03g50870 12003.m34915 protein expressed protein seq=cds; coord=1:269023130..269026101:1; parent_gene=GRMZM2G046849	7.62003	16.463	5.7232
GRMZM2G439246_T01	GRMZM2G439246	response to abiotic stimulus/response to cold	not assigned.unknown	1.35229	5.64e-07	3.89e-06	weakly similar to ( 129) loc_os06g50410 12006.m09565 protein conserved hypothetical protein seq=cds; coord=5:62082401..62083741:-1; parent_gene=GRMZM2G439246	6.17335	13.9979
AC233899.1_FGT005	AC233899.1	response to abiotic stimulus/response to cold	not assigned.unknown	1.38572	1.02e-18	2.52e-17	weakly similar to ( 129) loc_os03g08970 12003.m06403 protein expressed protein seq=cds; coord=9:149651898..149652455:1; parent_gene=AC233899.1_FG005	76.7475	178.498	2.88821
GRMZM2G407146_T01	GRMZM2G407146	response to abiotic stimulus/response to cold	not assigned.unknown	1.42242	6.17e-17	1.31e-15	seq=cds; coord=2:6916861..6917347:1; parent_gene=GRMZM2G407146	62.1113	147.885	7.28042
GRMZM2G066449_T01	GRMZM2G066449	response to abiotic stimulus/response to cold	not assigned.unknown	1.47216	8.85e-07	5.9e-06	very weakly similar to (94.0) loc_os03g45930 12003.m09616 protein expressed protein seq=cds; coord=5:14841378..14843101:-1; parent_gene=GRMZM2G066449	3.69376	9.11049	5.14148
GRMZM2G374827_T01	GRMZM2G374827	response to abiotic stimulus/response to cold	not assigned.unknown	1.49428	1.32e-09	1.33e-08	highly similar to ( 752) AT5G49900 | Symbols: | catalytic/ glucosylceramidase | chr5:20297235-20302019 REVERSEnearly identical (1069) loc_os08g01940 12008.m080064 protein expressed protein seq=cds; coord=6:3039308..3044240:-1; parent_gene=GRMZM2G374827	3.22809	8.07598	5.34267
GRMZM2G033915_T01	GRMZM2G033915	response to abiotic stimulus/response to cold	not assigned.unknown	1.4984	9.53e-08	7.45e-07	weakly similar to ( 109) loc_os02g53360 12002.m10365 protein expressed protein seq=cds; coord=9:9300838..9302921:-1; parent_gene=GRMZM2G033915	5.65502	14.1993	14.0628
GRMZM2G423669_T01	GRMZM2G423669	response to abiotic stimulus/response to cold	not assigned.unknown	1.55962	1.51e-12	2.12e-11	seq=cds; coord=6:22002674..22003635:1; parent_gene=GRMZM2G423669	13.7357	36.0387	13.7373
GRMZM5G844046_T01	GRMZM5G844046	response to abiotic stimulus/response to cold	not assigned.unknown	1.6907	4.51e-13	6.72e-12	seq=cds; coord=5:83023500..83023965:-1; parent_gene=GRMZM5G844046	22.8894	65.7657	7.95435
GRMZM2G136800_T02	GRMZM2G136800	response to abiotic stimulus/response to cold	not assigned.unknown	1.93397	2.35e-22	7.4e-21	highly similar to ( 585) AT2G33570 | Symbols: | unknown protein | chr2:14217361-14219043 FORWARDhighly similar to ( 793) loc_os06g22330 12006.m06887 protein expressed protein seq=cds; coord=6:121370867..121376705:1; parent_gene=GRMZM2G136800	6.48573	22.0423	21.8628
AC233851.1_FGT008	AC233851.1	response to abiotic stimulus/response to cold	not assigned.unknown	1.96529	2.77e-09	2.69e-08	weakly similar to ( 108) loc_os01g58150 12001.m11960 protein expressed protein seq=cds; coord=3:189455463..189455828:1; parent_gene=AC233851.1_FG008	11.7444	40.8205	3.08233
GRMZM2G471517_T01	GRMZM2G471517	response to abiotic stimulus/response to cold	not assigned.unknown	2.10495	5.99e-34	3.84e-32	seq=cds; coord=3:22956305..22957389:1; parent_gene=GRMZM2G471517	21.8627	83.855	8.1695
GRMZM2G319454_T01	GRMZM2G319454	response to abiotic stimulus/response to cold	not assigned.unknown	2.41795	1.99e-11	2.49e-10	weakly similar to ( 117) loc_os05g09600 12005.m083642 protein expressed protein seq=cds; coord=2:111314923..111315856:1; parent_gene=GRMZM2G319454	3.23857	15.3808	9.14517
GRMZM2G174310_T01	GRMZM2G174310	response to abiotic stimulus/response to cold	not assigned.unknown	2.61161	1.01e-38	8.47e-37	seq=cds; coord=1:217251801..217252801:-1; parent_gene=GRMZM2G174310	12.2462	66.5902	1.12701
GRMZM2G069444_T01	GRMZM2G069444	response to abiotic stimulus/response to cold	not assigned.unknown	2.61819	7.41e-12	9.74e-11	seq=cds; coord=4:120989219..120989816:1; parent_gene=GRMZM2G069444	4.61899	25.1932	2.4938
GRMZM2G367094_T01	GRMZM2G367094	response to abiotic stimulus/response to cold	not assigned.unknown	2.75488	3.6e-39	3.05e-37	seq=cds; coord=5:8461685..8462268:-1; parent_gene=GRMZM2G367094	17.4467	104.627	2.48366
GRMZM2G164912_T01	GRMZM2G164912	response to abiotic stimulus/response to cold	not assigned.unknown	2.92485	2.46e-36	1.81e-34	highly similar to ( 599) AT2G33570 | Symbols: | unknown protein | chr2:14217361-14219043 FORWARDhighly similar to ( 878) loc_os02g48190 12002.m09853 protein expressed protein seq=cds; coord=5:202286047..202289158:-1; parent_gene=GRMZM2G164912	3.17556	21.3957	15.7162
GRMZM2G124409_T01	GRMZM2G124409	response to abiotic stimulus/response to cold	not assigned.unknown	2.95192	6.24e-22	1.92e-20	seq=cds; coord=9:124643027..124644435:1; parent_gene=GRMZM2G124409	2.91626	20.0952	21.6046
GRMZM2G392106_T01	GRMZM2G392106	response to abiotic stimulus/response to cold	not assigned.unknown	3.06939	6.67e-07	4.54e-06	seq=cds; coord=2:109490900..109491954:1; parent_gene=GRMZM2G392106	0.754508	5.62826
GRMZM2G444817_T01	GRMZM2G444817	response to abiotic stimulus/response to cold	not assigned.unknown	3.29453	7.63e-07	5.14e-06	seq=cds; coord=8:155976391..155976841:-1; parent_gene=GRMZM2G444817	1.41198	12.3165
GRMZM2G133095_T01	GRMZM2G133095	response to abiotic stimulus/response to cold	not assigned.unknown	3.71013	1.32e-07	1.01e-06	weakly similar to ( 110) AT5G12340 | Symbols: | unknown protein | chr5:3992948-3993610 REVERSEmoderately similar to ( 289) loc_os05g31970 12005.m07430 protein expressed protein seq=cds; coord=8:91312778..91313426:-1; parent_gene=GRMZM2G133095	0.735907	8.55891
GRMZM2G369445_T01	GRMZM2G369445	response to abiotic stimulus/response to cold	not assigned.unknown	4.1901	8.73e-14	1.39e-12	seq=cds; coord=2:222647756..222648525:1; parent_gene=GRMZM2G369445	0.827019	13.4329	2.30231
GRMZM2G135165_T01	GRMZM2G135165	response to abiotic stimulus/response to cold	not assigned.unknown	35.4345	2.09e-55	3.28e-53	very weakly similar to (82.0) AT5G17210 | Symbols: | unknown protein | chr5:5656700-5657970 FORWARDweakly similar to ( 160) loc_os05g35930 12005.m07823 protein expressed protein seq=cds; coord=6:150367837..150369671:-1; parent_gene=GRMZM2G135165		24.538
GRMZM2G039961_T01	GRMZM2G039961	response to abiotic stimulus/response to cold/response to antibiotic/response to drug/response to chemical stimulus	not assigned.unknown	2.21436	9.38e-13	1.34e-11	seq=cds; coord=2:4571600..4572586:1; parent_gene=GRMZM2G039961	4.51635	18.6303
GRMZM2G006676_T01	GRMZM2G006676	response to abiotic stimulus/response to cold/response to wounding	not assigned.unknown	1.10088	3.04e-20	8.36e-19	seq=cds; coord=1:19104049..19104908:-1; parent_gene=GRMZM2G006676	565.905	1080.43	63.7152
GRMZM2G107711_T01	GRMZM2G107711	response to abiotic stimulus/response to cold/response to wounding	not assigned.unknown	3.40563	3.19e-11	3.9e-10	seq=cds; coord=2:9266461..9267353:-1; parent_gene=GRMZM2G107711	1.06966	10.0812	102.147
GRMZM2G030688_T01	GRMZM2G030688	response to abiotic stimulus/response to cold/response to wounding	not assigned.unknown	1.27348	4.07e-07	2.87e-06	weakly similar to ( 135) loc_os01g68650 12001.m12967 protein plant-specific domain TIGR01615 family protein, expressed seq=cds; coord=8:162586278..162587330:1; parent_gene=GRMZM2G030688	9.82723	21.1006	1.37745
GRMZM2G314520_T01	GRMZM2G314520	response to abiotic stimulus/response to cold/response to wounding	not assigned.unknown	1.96287	3.93e-09	3.74e-08	weakly similar to ( 113) AT1G28280 | Symbols: | VQ motif-containing protein | chr1:9886297-9887395 REVERSEmoderately similar to ( 210) loc_os01g54400 12001.m11604 protein DNA-binding WRKY, putative, expressed seq=cds; coord=3:197382762..197384196:-1; parent_gene=GRMZM2G314520	2.88448	10.0109	1.57231
GRMZM2G134694_T01	GRMZM2G134694	response to DNA damage stimulus	not assigned.unknown	-4.05638	5.41e-16	1.07e-14	weakly similar to ( 140) AT5G01630 | Symbols: BRCA2B, BRCA2(V), ATBRCA2(V) | BRCA2B (BRCA2-LIKE B); protein binding / single-stranded DNA binding | chr5:235117-240911 REVERSEmoderately similar to ( 323) loc_os01g07110 12001.m07338 protein BRCA2 repeat family protein, expressed seq=cds; coord=10:96375471..96398825:-1; parent_gene=GRMZM2G134694	6.84246	0.365888	23.4739
GRMZM2G153582_T01	GRMZM2G153582	response to DNA damage stimulus	not assigned.unknown	-1.81497	2.18e-17	4.8e-16	moderately similar to ( 412) loc_os05g07860 12005.m05304 protein uvrB/uvrC motif family protein, expressed seq=cds; coord=8:80438144..80441395:1; parent_gene=GRMZM2G153582	29.724	7.52282	55.7981
GRMZM2G006985_T01	GRMZM2G006985	response to DNA damage stimulus	not assigned.unknown	-1.18335	1.03e-23	3.54e-22	seq=cds; coord=2:135820340..135820936:1; parent_gene=GRMZM2G006985	4122.52	1608.41	1.32644
GRMZM2G057571_T01	GRMZM2G057571	response to DNA damage stimulus	not assigned.unknown	1.15487	4.89e-08	4e-07	weakly similar to ( 177) AT3G02820 | Symbols: | zinc knuckle (CCHC-type) family protein | chr3:611573-613294 FORWARDmoderately similar to ( 323) loc_os02g52460 12002.m10277 protein nucleic acid binding protein, putative, expressed seq=cds; coord=5:65090437..65092062:-1; parent_gene=GRMZM2G057571	11.8577	23.5135	30.2318
GRMZM2G061751_T01	GRMZM2G061751	response to drug/response to DNA damage stimulus	not assigned.unknown	32.37	2.52e-08	2.15e-07	weakly similar to ( 140) AT1G29300 | Symbols: UNE1 | UNE1 (unfertilized embryo sac 1) | chr1:10248120-10249499 REVERSEmoderately similar to ( 291) loc_os05g11650 12005.m05634 protein expressed protein seq=cds; coord=6:131356659..131358537:1; parent_gene=GRMZM2G061751		2.44653	3.77388
GRMZM2G109805_T02	GRMZM2G109805	response to wounding	not assigned.unknown	1.17874	8.05e-08	6.38e-07	moderately similar to ( 353) AT2G12400 | Symbols: | unknown protein | chr2:5005144-5008140 REVERSEmoderately similar to ( 408) loc_os06g43780 12006.m08908 protein expressed protein seq=cds; coord=5:95001236..95003835:-1; parent_gene=GRMZM2G109805	8.16862	16.4149
AC199487.4_FGT003	AC199487.4	response to wounding	not assigned.unknown	-3.61046	4.15e-06	2.46e-05	seq=cds; coord=1:165812007..165812252:-1; parent_gene=AC199487.4_FG003	21.3563	1.55726	48.4796
GRMZM2G065388_T01	GRMZM2G065388	response to wounding	not assigned.unknown	-1.82286	9.78e-06	5.43e-05	moderately similar to ( 394) AT2G48060 | Symbols: | unknown protein | chr2:19651560-19662386 REVERSEhighly similar to ( 601) loc_os01g29230 12001.m09360 protein expressed protein seq=cds; coord=3:72860957..72883080:-1; parent_gene=GRMZM2G065388	4.048	1.01768	6.29969
GRMZM2G154864_T01	GRMZM2G154864	response to wounding	not assigned.unknown	-1.1955	3.52e-13	5.3e-12	moderately similar to ( 376) AT1G29320 | Symbols: | transducin family protein / WD-40 repeat family protein | chr1:10255355-10258238 FORWARDhighly similar to ( 608) loc_os07g32350 12007.m07500 protein WD-repeat protein 74, putative, expressed seq=cds; coord=2:202174038..202178923:-1; parent_gene=GRMZM2G154864	41.5402	16.1363	56.1425
GRMZM5G838098_T03	GRMZM5G838098	response to wounding	not assigned.unknown	1.75298	9.14e-13	1.31e-11	weakly similar to ( 152) loc_os03g08320 12003.m06341 protein pnFL-2, putative, expressed seq=cds; coord=1:16783282..16784713:1; parent_gene=GRMZM5G838098	7.64488	22.9141
GRMZM2G383699_T01	GRMZM2G383699	response to wounding	not assigned.unknown	1.9988	1.2e-13	1.88e-12	very weakly similar to (80.5) loc_os01g72910 12001.m13323 protein abscisic stress ripening protein 2, putative, expressed seq=cds; coord=3:65737318..65737903:1; parent_gene=GRMZM2G383699	11.4103	40.5312
GRMZM2G092003_T01	GRMZM2G092003	response to wounding	not assigned.unknown	32.2443	1.8e-07	1.35e-06	weakly similar to ( 129) AT1G49330 | Symbols: | hydroxyproline-rich glycoprotein family protein | chr1:18250043-18251038 FORWARDweakly similar to ( 175) loc_os05g47590 12005.m08831 protein conserved hypothetical protein seq=cds; coord=8:63893483..63894955:-1; parent_gene=GRMZM2G092003		2.86078
AC209356.4_FGT001	AC209356.4	stress.abiotic.	not assigned.unknown	2.17633	8.94e-14	1.42e-12	seq=cds; coord=4:235888891..235889255:1; parent_gene=AC209356.4_FG001	19.0803	76.7605
GRMZM2G101584_T01	GRMZM2G101584	stress.abiotic.	not assigned.unknown	-2.35757	6.86e-77	2.44e-74	seq=cds; coord=6:159783970..159784645:-1; parent_gene=GRMZM2G101584	1593.17	275.516	1.4598
GRMZM2G149869_T01	GRMZM2G149869	stress.abiotic.	not assigned.unknown	-1.14419	1.05e-17	2.39e-16	seq=cds; coord=5:211616844..211617438:-1; parent_gene=GRMZM2G149869	538.281	216.003
GRMZM2G472403_T02	GRMZM2G472403	stress.abiotic.unspecified	not assigned.unknown	-2.84491	4.53e-09	4.27e-08	moderately similar to ( 374) loc_os03g37140 12003.m08826 protein expressed protein seq=cds; coord=1:245039264..245043621:-1; parent_gene=GRMZM2G472403	3.07024	0.38026	1.55403
GRMZM2G057841_T01	GRMZM2G057841	stress.abiotic.unspecified	not assigned.unknown	1.93852	2.21e-20	6.18e-19	seq=cds; coord=5:171119248..171119873:-1; parent_gene=GRMZM2G057841	25.2017	85.7874
GRMZM2G150014_T02	GRMZM2G150014	response to abiotic stimulus/response to cold	nucleotide metabolism.phosphotransfer and pyrophosphatases.adenylate kinase	-3.69296	1.34e-06	8.65e-06	weakly similar to ( 132) AT2G37250 | Symbols: ADK, ATPADK1 | ADK (ADENOSINE KINASE); adenylate kinase/ nucleotide kinase | chr2:15641991-15643318 FORWARDweakly similar to ( 132) KADC_SOLTU Adenylate kinase, chloroplast precursor (EC 2.7.4.3) (ATP-AMP transphosphorylase) - Solanum tuberosum (Potato)weakly similar to ( 152) loc_os04g57540 12004.m35511 protein adenylate kinase, chloroplast precursor…	3.39345	0.233304	5.39824
GRMZM2G310947_T02	GRMZM2G310947	response to DNA damage stimulus	protein.degradation.AAA type	2.01179	7.23e-47	8.87e-45	moderately similar to ( 443) AT5G40010 | Symbols: AATP1 | AATP1 (AAA-ATPase 1); ATP binding / ATPase/ nucleoside-triphosphatase/ nucleotide binding | chr5:16020218-16021762 REVERSEhighly similar to ( 530) loc_os12g44210 12012.m08192 protein cell Division Protein AAA ATPase family, putative, expressed seq=cds; coord=1:180624825..180627010:-1; parent_gene=GRMZM2G310947	31.8257	114.26	1.76939
GRMZM2G003984_T01	GRMZM2G003984	stress.abiotic.unspecified	protein.degradation.serine protease	-2.45137	1.16e-08	1.04e-07	nearly identical (1185) AT5G26860 | Symbols: LON_ARA_ARA, LON1 | LON1 (LON PROTEASE 1); ATP binding / ATP-dependent peptidase/ serine-type peptidase | chr5:9451048-9456631 FORWARDnearly identical (1310) LONH2_MAIZE Lon protease homolog 2, mitochondrial precursor (EC 3.4.21.-) - Zea mays (Maize)nearly identical (1308) loc_os07g48960 12007.m09105 protein lon protease homolog 2, mitochondrial precur…	4.24996	0.69099	5.98834
GRMZM2G354373_T01	GRMZM2G354373	response to abiotic stimulus/response to cold	protein.degradation.subtilases	1.92116	8.37e-45	9.25e-43	highly similar to ( 888) AT3G14240 | Symbols: | subtilase family protein | chr3:4741637-4743964 REVERSEnearly identical (1187) loc_os08g35090 12008.m07498 protein subtilisin-like protease precursor, putative, expressed seq=cds; coord=4:62793116..62796058:1; parent_gene=GRMZM2G354373	28.0211	94.1767	64.5634
GRMZM2G164426_T01	GRMZM2G164426	response to abiotic stimulus/response to cold	protein.degradation.ubiquitin.E3.RING	-1.3409	4.21e-06	2.5e-05	weakly similar to ( 187) AT2G17730 | Symbols: | zinc finger (C3HC4-type RING finger) family protein | chr2:7704142-7705312 FORWARDmoderately similar to ( 335) loc_os07g29600 12007.m28976 protein RING-H2 finger protein ATL2B, putative, expressed seq=cds; coord=2:199342070..199345016:-1; parent_gene=GRMZM2G164426	13.9957	4.91135	49.116
GRMZM2G073310_T01	GRMZM2G073310	response to abiotic stimulus/response to cold	protein.degradation.ubiquitin.E3.RING	1.00904	1.26e-11	1.61e-10	very weakly similar to (86.3) AT3G18710 | Symbols: PUB29, ATPUB29 | PUB29 (PLANT U-BOX 29); ubiquitin-protein ligase | chr3:6434234-6435481 REVERSEmoderately similar to ( 434) loc_os05g36360 12005.m07866 protein photoperiod responsive protein, putative, expressed seq=cds; coord=6:149086737..149088411:1; parent_gene=GRMZM2G073310	36.8776	65.9821	19.6281
GRMZM2G059042_T01	GRMZM2G059042	response to abiotic stimulus/response to cold	protein.degradation.ubiquitin.E3.RING	1.47488	7.59e-13	1.1e-11	weakly similar to ( 116) AT5G64660 | Symbols: ATCMPG2, CMPG2 | U-box domain-containing protein | chr5:25842119-25843381 REVERSEvery weakly similar to (81.3) SPL11_ORYSA Spotted leaf protein 11 (Spotted leaf11) (Cell death-related protein SPL11) - Oryza sativa (Rice)highly similar to ( 501) loc_os04g34140 12004.m08508 protein photoperiod responsive protein, putative, expressed seq=cds; coord=10:11…	9.17281	22.7092	20.9823
GRMZM2G130348_T01	GRMZM2G130348	response to abiotic stimulus/response to cold	protein.degradation.ubiquitin.E3.SCF.FBOX	-1.64541	4.58e-10	4.87e-09	moderately similar to ( 398) AT2G32560 | Symbols: | F-box family protein | chr2:13824820-13826761 FORWARDhighly similar to ( 602) loc_os01g17390 12001.m08330 protein cyclin-like F-box, putative, expressed seq=cds; coord=3:46175909..46179583:1; parent_gene=GRMZM2G130348	10.0799	2.86652	28.8805
GRMZM2G133016_T02	GRMZM2G133016	response to abiotic stimulus/response to cold	protein.degradation.ubiquitin.E3.SCF.FBOX	-4.56584	7.81e-07	5.24e-06	very weakly similar to (99.8) AT1G70590 | Symbols: | F-box family protein | chr1:26618403-26620159 FORWARDmoderately similar to ( 205) loc_os04g40030 12004.m08987 protein sel1-like repeat, putative, expressed seq=cds; coord=10:125107366..125111470:1; parent_gene=GRMZM2G133016	1.69476	0.0637201	1.6084
GRMZM2G090328_T01	GRMZM2G090328	response to abiotic stimulus/response to cold	protein.degradation.ubiquitin.E3.SCF.FBOX	2.19043	9.46e-51	1.3e-48	weakly similar to ( 110) AT4G22030 | Symbols: | F-box family protein | chr4:11672396-11675575 FORWARDmoderately similar to ( 249) loc_os02g13220 12002.m06569 protein expressed protein seq=cds; coord=4:229315807..229317342:-1; parent_gene=GRMZM2G090328	32.6487	132.558	6.92493
GRMZM2G381086_T01	GRMZM2G381086	response to abiotic stimulus/response to cold	protein.postranslational modification	1.4914	2.64e-19	6.78e-18	moderately similar to ( 371) AT3G53380 | Symbols: | lectin protein kinase family protein | chr3:19789204-19791351 REVERSEweakly similar to ( 170) PSKR_DAUCA Phytosulfokine receptor precursor (EC 2.7.11.1) (Phytosulfokine LRR receptor kinase) - Daucus carota (Carrot)moderately similar to ( 499) loc_os05g03450 12005.m04879 protein carbohydrate binding protein, putative, expressed seq=cds; coord=6:2…	11.7402	29.3421	17.7984
GRMZM2G098042_T01	GRMZM2G098042	response to abiotic stimulus/response to cold	protein.postranslational modification	-1.07815	2.54e-11	3.13e-10	weakly similar to ( 185) AT2G40730 | Symbols: | HEAT repeat-containing protein | chr2:16990083-16996072 REVERSEmoderately similar to ( 374) loc_os01g60440 12001.m43246 protein ATP binding protein, putative, expressed seq=cds; coord=3:185246562..185259629:1; parent_gene=GRMZM2G098042	74.7477	31.5446	123.774
GRMZM2G028700_T01	GRMZM2G028700	response to abiotic stimulus/response to cold	protein.postranslational modification	-1.01391	5.5e-10	5.79e-09	nearly identical (1545) AT2G27210 | Symbols: BSL3 | kelch repeat-containing serine/threonine phosphoesterase family protein | chr2:11630188-11636182 FORWARDnearly identical (1663) BSL2_ORYSA Serine/threonine-protein phosphatase BSL2 homolog (EC 3.1.3.16) (BSU1-like protein 2 homolog) - Oryza sativa (Rice)nearly identical (1663) loc_os12g42310 12012.m08011 protein serine/threonine-protein phosphat…	21.1357	9.30685	47.4588
GRMZM2G059453_T01	GRMZM2G059453	response to abiotic stimulus/response to cold	protein.postranslational modification	1.02259	6.41e-12	8.45e-11	moderately similar to ( 306) AT1G07430 | Symbols: | protein phosphatase 2C, putative / PP2C, putative | chr1:2281151-2282656 REVERSEmoderately similar to ( 469) loc_os01g62760 12001.m12397 protein protein phosphatase 2C, putative, expressed seq=cds; coord=3:180041545..180043505:-1; parent_gene=GRMZM2G059453	35.8697	64.7914	100.071
GRMZM2G100114_T01	GRMZM2G100114	response to abiotic stimulus/response to cold	protein.postranslational modification	1.20963	2.97e-08	2.51e-07	moderately similar to ( 206) AT3G57120 | Symbols: | protein kinase family protein | chr3:21139099-21140469 FORWARDmoderately similar to ( 320) loc_os09g39860 12009.m06923 protein protein kinase, putative, expressed seq=cds; coord=6:111367346..111368910:1; parent_gene=GRMZM2G100114	9.66397	19.8274	3.70724
GRMZM2G308615_T01	GRMZM2G308615	response to abiotic stimulus/response to cold	protein.postranslational modification	2.94372	7.97e-41	7.28e-39	moderately similar to ( 260) AT3G11410 | Symbols: ATPP2CA, AHG3, PP2CA | PP2CA (ARABIDOPSIS THALIANA PROTEIN PHOSPHATASE 2CA); protein binding / protein serine/threonine phosphatase | chr3:3584181-3585649 REVERSEmoderately similar to ( 354) loc_os09g15670 12009.m04828 protein protein phosphatase 2C, putative, expressed seq=cds; coord=7:89034033..89035626:-1; parent_gene=GRMZM2G308615	5.29339	36.2897	3.63979
GRMZM2G058220_T01	GRMZM2G058220	response to wounding	protein.postranslational modification.kinase.receptor like cytoplasmatic kinase VII	3.3902	3.08e-14	5.15e-13	moderately similar to ( 393) AT5G35370 | Symbols: | ATP binding / carbohydrate binding / kinase/ protein kinase/ protein serine/threonine kinase/ protein tyrosine kinase/ sugar binding | chr5:13588564-13591182 REVERSEmoderately similar to ( 206) KPRO_MAIZE Putative receptor protein kinase ZmPK1 precursor (EC 2.7.11.1) - Zea mays (Maize)highly similar to ( 568) loc_os02g52850 12002.m10315 protein …	0.427386	3.98511
AC195785.3_FGT004	AC195785.3	response to wounding	protein.postranslational modification.kinase.receptor like cytoplasmatic kinase VII	-1.3423	1.45e-07	1.1e-06	highly similar to ( 513) AT5G35370 | Symbols: | ATP binding / carbohydrate binding / kinase/ protein kinase/ protein serine/threonine kinase/ protein tyrosine kinase/ sugar binding | chr5:13588564-13591182 REVERSEmoderately similar to ( 214) KPRO_MAIZE Putative receptor protein kinase ZmPK1 precursor (EC 2.7.11.1) - Zea mays (Maize)highly similar to ( 982) loc_os12g44320 12012.m08203 protein ATP …	8.15248	2.86339	8.20163
GRMZM2G081160_T01	GRMZM2G081160	response to oxidative stress/response to chemical stimulus	redox.ascorbate and glutathione.ascorbate	-2.78253	1.62e-11	2.05e-10	weakly similar to ( 138) AT1G77490 | Symbols: TAPX | TAPX (THYLAKOIDAL ASCORBATE PEROXIDASE); L-ascorbate peroxidase | chr1:29117688-29120046 FORWARDweakly similar to ( 155) APX6_ORYSA Probable L-ascorbate peroxidase 6, chloroplast precursor (EC 1.11.1.11) (OsAPx06) - Oryza sativa (Rice)weakly similar to ( 155) loc_os12g07820 12012.m04769 protein OsAPx6 - Stromal Ascorbate Peroxidase encoding gen…	10.5304	1.36232	33.4703
GRMZM2G329144_T02	GRMZM2G329144	response to oxidative stress/response to chemical stimulus	redox.ascorbate and glutathione.glutathione	-3.17469	2.03e-09	2e-08	weakly similar to ( 104) AT2G48150 | Symbols: ATGPX4 | ATGPX4 (GLUTATHIONE PEROXIDASE 4); glutathione peroxidase | chr2:19688109-19689099 REVERSEvery weakly similar to (86.3) GPX4_SPIOL Probable phospholipid hydroperoxide glutathione peroxidase (EC 1.11.1.12) (PHGPx) - Spinacia oleracea (Spinach)weakly similar to ( 127) loc_os03g24380 12003.m07784 protein glutathione peroxidase 4, putative, expre…	12.1239	1.19565	18.7117
GRMZM5G884600_T01	GRMZM5G884600	response to oxidative stress/response to chemical stimulus	redox.ascorbate and glutathione.glutathione	1.95643	7.55e-24	2.61e-22	moderately similar to ( 294) AT4G11600 | Symbols: ATGPX6, PHGPX, LSC803 | ATGPX6 (GLUTATHIONE PEROXIDASE 6); glutathione peroxidase | chr4:7010021-7011330 REVERSEmoderately similar to ( 290) GPX4_CITSI Probable phospholipid hydroperoxide glutathione peroxidase (EC 1.11.1.12) (PHGPx) (Salt-associated protein) - Citrus sinensis (Sweet orange)moderately similar to ( 316) loc_os04g46960 12004.m101614…	20.0205	69.0202	1.559
GRMZM5G841142_T02	GRMZM5G841142	response to abiotic stimulus/response to cold/response to oxidative stress/response to chemical stimulus	redox.thioredoxin	2.00901	1.32e-41	1.24e-39	moderately similar to ( 493) AT2G17420 | Symbols: NTRA, ATNTRA, NTR2 | NTRA (NADPH-DEPENDENT THIOREDOXIN REDUCTASE A); thioredoxin-disulfide reductase | chr2:7564357-7566219 FORWARDhighly similar to ( 610) loc_os06g22140 12006.m06869 protein thioredoxin reductase 2, putative, expressed seq=cds; coord=6:121308710..121312198:-1; parent_gene=GRMZM5G841142	31.4834	113.259	14.0233
GRMZM2G046916_T01	GRMZM2G046916	response to abiotic stimulus/response to cold	RNA.processing.splicing	1.83051	3.46e-17	7.47e-16	moderately similar to ( 362) AT1G03140 | Symbols: | splicing factor Prp18 family protein | chr1:754471-756223 REVERSEhighly similar to ( 517) loc_os07g38420 12007.m08088 protein prp18 domain containing protein, expressed seq=cds; coord=7:159464611..159467729:-1; parent_gene=GRMZM2G046916	5.30223	16.7963	14.5399
GRMZM2G100727_T01	GRMZM2G100727	response to abiotic stimulus/response to cold	RNA.regulation of transcription.AP2/EREBP, APETALA2/Ethylene-responsive element binding protein family	-3.84964	1.39e-07	1.06e-06	very weakly similar to (99.0) AT5G50080 | Symbols: ERF110 | DNA binding / transcription factor | chr5:20365948-20366835 FORWARDvery weakly similar to (80.5) ERF1_ORYSA Ethylene-responsive transcription factor 1 (Ethylene-responsive element-binding factor 1) (EREBP-1) (OsEREBP1) - Oryza sativa (Rice)weakly similar to ( 159) loc_os05g36100 12005.m07840 protein DNA binding protein, putative, express…	4.60255	0.283977
GRMZM2G173771_T01	GRMZM2G173771	response to abiotic stimulus/response to cold	RNA.regulation of transcription.AP2/EREBP, APETALA2/Ethylene-responsive element binding protein family	1.11575	1.64e-15	3.11e-14	weakly similar to ( 142) loc_os02g52670 12002.m10297 protein ethylene-responsive element binding protein 2, putative, expressed seq=cds; coord=4:178590006..178591058:1; parent_gene=GRMZM2G173771	78.9202	151.888	1.98965
GRMZM2G132185_T01	GRMZM2G132185	response to abiotic stimulus/response to cold	RNA.regulation of transcription.AP2/EREBP, APETALA2/Ethylene-responsive element binding protein family	1.2903	1.09e-23	3.74e-22	very weakly similar to (89.7) AT5G44210 | Symbols: ERF9, ATERF9, ATERF-9 | ERF9 (ERF DOMAIN PROTEIN 9); DNA binding / transcription factor/ transcription repressor | chr5:17806742-17807344 FORWARDvery weakly similar to (91.7) ERF4_NICSY Ethylene-responsive transcription factor 4 (Ethylene-responsive element-binding factor 4 homolog) (EREBP-3) (NsERF3) - Nicotiana sylvestris (Wood tobacco)weakly s…	137.492	298.922	38.495
GRMZM5G842961_T01	GRMZM5G842961	response to abiotic stimulus/response to cold	RNA.regulation of transcription.AP2/EREBP, APETALA2/Ethylene-responsive element binding protein family	1.73003	5.52e-10	5.81e-09	weakly similar to ( 136) AT2G44940 | Symbols: | AP2 domain-containing transcription factor TINY, putative | chr2:18537294-18538181 FORWARDvery weakly similar to (80.9) ERF1_ORYSA Ethylene-responsive transcription factor 1 (Ethylene-responsive element-binding factor 1) (EREBP-1) (OsEREBP1) - Oryza sativa (Rice)moderately similar to ( 204) loc_os02g43940 12002.m09429 protein transcriptional factor …	8.01733	23.6557	10.2417
GRMZM2G466044_T01	GRMZM2G466044	response to abiotic stimulus/response to cold	RNA.regulation of transcription.AP2/EREBP, APETALA2/Ethylene-responsive element binding protein family	1.92019	8.75e-29	4.31e-27	weakly similar to ( 129) AT4G17500 | Symbols: ATERF-1 | ATERF-1 (ETHYLENE RESPONSIVE ELEMENT BINDING FACTOR 1); DNA binding / transcription activator/ transcription factor | chr4:9759405-9760211 FORWARDweakly similar to ( 131) ERF2_NICSY Ethylene-responsive transcription factor 2 (Ethylene-responsive element-binding factor 2) (EREBP-2) (NsERF2) - Nicotiana sylvestris (Wood tobacco)moderately simi…	16.3363	54.8338	13.2722
GRMZM2G103085_T01	GRMZM2G103085	response to abiotic stimulus/response to cold	RNA.regulation of transcription.AP2/EREBP, APETALA2/Ethylene-responsive element binding protein family	1.95615	1.29e-46	1.57e-44	weakly similar to ( 122) loc_os02g52670 12002.m10297 protein ethylene-responsive element binding protein 2, putative, expressed seq=cds; coord=5:209896463..209897682:-1; parent_gene=GRMZM2G103085	68.6392	237.073	9.3791
GRMZM2G027976_T01	GRMZM2G027976	response to wounding	RNA.regulation of transcription.bZIP transcription factor family	3.79294	1.37e-19	3.6e-18	weakly similar to ( 173) AT3G58120 | Symbols: ATBZIP61, BZIP61 | BZIP61; DNA binding / transcription activator/ transcription factor | chr3:21521289-21523078 REVERSEvery weakly similar to (92.0) RF2B_ORYSA Transcription factor RF2b - Oryza sativa (Rice)moderately similar to ( 226) loc_os01g55150 12001.m11675 protein transcription factor RF2b, putative, expressed seq=cds; coord=3:196153277..196156…	0.762184	9.39946
GRMZM2G009406_T01	GRMZM2G009406	response to abiotic stimulus/response to cold	RNA.regulation of transcription.C2C2(Zn) DOF zinc finger family	1.79415	6.22e-42	5.98e-40	weakly similar to ( 107) AT3G50410 | Symbols: OBP1 | OBP1 (OBF BINDING PROTEIN 1); DNA binding / protein binding / transcription factor | chr3:18709872-18710633 FORWARDweakly similar to ( 144) MNB1A_MAIZE Dof zinc finger protein MNB1A - Zea mays (Maize)moderately similar to ( 215) loc_os09g29960 12009.m06147 protein dof zinc finger protein MNB1A, putative, expressed seq=cds; coord=2:188526058..18…	60.7764	187.044	9.15393
GRMZM2G089850_T01	GRMZM2G089850	response to abiotic stimulus/response to cold	RNA.regulation of transcription.C2C2(Zn) DOF zinc finger family	2.09625	1.53e-20	4.31e-19	very weakly similar to (96.3) AT3G21270 | Symbols: ADOF2 | ADOF2; DNA binding / transcription factor | chr3:7474934-7475548 FORWARDweakly similar to ( 127) MNB1A_MAIZE Dof zinc finger protein MNB1A - Zea mays (Maize)weakly similar to ( 140) loc_os09g29960 12009.m06147 protein dof zinc finger protein MNB1A, putative, expressed seq=cds; coord=7:130360893..130362159:-1; parent_gene=GRMZM2G089850	7.91608	30.0844	12.2112
GRMZM2G010290_T02	GRMZM2G010290	response to abiotic stimulus/response to cold	RNA.regulation of transcription.C2C2(Zn) DOF zinc finger family	32.178	3.49e-07	2.49e-06	weakly similar to ( 136) AT4G24060 | Symbols: | Dof-type zinc finger domain-containing protein | chr4:12503970-12505417 FORWARDweakly similar to ( 123) PBF_MAIZE Dof zinc finger protein PBF (Prolamin box-binding factor) - Zea mays (Maize)moderately similar to ( 294) loc_os04g47990 12004.m35186 protein dof zinc finger protein, putative, expressed seq=cds; coord=10:137204209..137206460:1; parent_ge…		3.02891	2.42714
GRMZM2G106026_T01	GRMZM2G106026	response to abiotic stimulus/response to cold	RNA.regulation of transcription.C2H2 zinc finger family	32.0333	1.31e-06	8.45e-06	very weakly similar to (97.8) AT5G04340 | Symbols: C2H2, CZF2, ZAT6 | ZAT6 (ZINC FINGER OF ARABIDOPSIS THALIANA 6); nucleic acid binding / transcription factor/ zinc ion binding | chr5:1216321-1217037 REVERSEvery weakly similar to (92.4) ZFP1_WHEAT Zinc-finger protein 1 (WZF1) - Triticum aestivum (Wheat)weakly similar to ( 197) loc_os03g32230 12003.m08467 protein zinc-finger protein 1, putative, …		3.86338
GRMZM2G078691_T01	GRMZM2G078691	response to abiotic stimulus/response to cold	RNA.regulation of transcription.CCAAT box binding factor family, HAP5	1.07407	3.09e-15	5.65e-14	weakly similar to ( 171) AT1G56170 | Symbols: HAP5B, ATHAP5B, NF-YC2 | NF-YC2 (NUCLEAR FACTOR Y, SUBUNIT C2); DNA binding / transcription activator/ transcription factor | chr1:21025118-21025717 FORWARDmoderately similar to ( 210) loc_os09g30310 12009.m06182 protein nuclear transcription factor Y subunit C-2, putative, expressed seq=cds; coord=7:131185760..131186899:1; parent_gene=GRMZM2G078691	87.84	164.827	239.622
GRMZM2G022162_T01	GRMZM2G022162	response to abiotic stimulus/response to cold	RNA.regulation of transcription.CCAAT box binding factor family, HAP5	3.26045	4.47e-16	8.91e-15	weakly similar to ( 130) AT1G56170 | Symbols: HAP5B, ATHAP5B, NF-YC2 | NF-YC2 (NUCLEAR FACTOR Y, SUBUNIT C2); DNA binding / transcription activator/ transcription factor | chr1:21025118-21025717 FORWARDweakly similar to ( 141) loc_os09g30310 12009.m06182 protein nuclear transcription factor Y subunit C-2, putative, expressed seq=cds; coord=2:189204687..189208176:-1; parent_gene=GRMZM2G022162	1.56219	13.3277	12.0764
GRMZM2G178261_T01	GRMZM2G178261	response to abiotic stimulus/response to cold	RNA.regulation of transcription.General Transcription	2.27782	5.6e-24	1.96e-22	weakly similar to ( 185) AT2G22840 | Symbols: AtGRF1 | AtGRF1 (GROWTH-REGULATING FACTOR 1); transcription activator | chr2:9728841-9731141 FORWARDhighly similar to ( 590) loc_os03g51970 12003.m10176 protein growth-regulating factor 1, putative, expressed seq=cds; coord=1:272348922..272353057:1; parent_gene=GRMZM2G178261	3.91742	16.9213	12.7421
GRMZM2G028438_T01	GRMZM2G028438	response to abiotic stimulus/response to cold	RNA.regulation of transcription.GRAS transcription factor family	1.01133	3.36e-10	3.63e-09	weakly similar to ( 200) AT5G52510 | Symbols: | scarecrow-like transcription factor 8 (SCL8) | chr5:21307196-21309118 FORWARDweakly similar to ( 139) CIGR2_ORYSA Chitin-inducible gibberellin-responsive protein 2 - Oryza sativa (Rice)highly similar to ( 508) loc_os02g45760 12002.m09613 protein chitin-inducible gibberellin-responsive protein 2, putative, expressed seq=cds; coord=4:156022485..156024…	19.0677	34.2432	18.5929
GRMZM2G088783_T01	GRMZM2G088783	response to abiotic stimulus/response to cold	RNA.regulation of transcription.MYB domain transcription factor family	2.91902	8.37e-13	1.21e-11	moderately similar to ( 233) AT3G13890 | Symbols: MYB26 | ATMYB26 (MYB DOMAIN PROTEIN 26); DNA binding / transcription factor | chr3:4576744-4578027 REVERSEweakly similar to ( 190) MYB3_HORVU Myb-related protein Hv33 - Hordeum vulgare (Barley)moderately similar to ( 310) loc_os01g51260 12001.m11307 protein MYB9, putative, expressed seq=cds; coord=3:204151795..204153806:-1; parent_gene=GRMZM2G0887…	1.4225	9.55573	3.12004
GRMZM2G006352_T01	GRMZM2G006352	response to wounding	RNA.regulation of transcription.MYB domain transcription factor family	1.75318	2.3e-13	3.53e-12	moderately similar to ( 214) AT3G49690 | Symbols: RAX3, MYB84, ATMYB84 | MYB84 (MYB DOMAIN PROTEIN 84); DNA binding / transcription factor | chr3:18427941-18429100 FORWARDweakly similar to ( 167) MYB4_ORYSA Myb-related protein Myb4 (OsMyb4) (Transcription factor RLTR1) - Oryza sativa (Rice)moderately similar to ( 309) loc_os01g49160 12001.m11104 protein myb-like DNA-binding domain containing prot…	8.20088	24.5889	24.3786
GRMZM2G114850_T01	GRMZM2G114850	response to abiotic stimulus/response to cold	RNA.regulation of transcription.NAC domain transcription factor family	1.74986	1.69e-19	4.37e-18	moderately similar to ( 218) AT1G56010 | Symbols: NAC1, ANAC022 | NAC1; transcription factor | chr1:20946852-20949144 REVERSEweakly similar to ( 183) NAC77_ORYSA NAC domain-containing protein 77 (ONAC077) (ONAC300) - Oryza sativa (Rice)moderately similar to ( 369) loc_os12g41680 12012.m07949 protein NAC domain-containing protein 21/22, putative, expressed seq=cds; coord=3:122071793..122076122:1; …	9.92791	29.7552	5.0251
GRMZM2G180328_T01	GRMZM2G180328	response to wounding	RNA.regulation of transcription.NAC domain transcription factor family	1.84232	1.89e-12	2.62e-11	moderately similar to ( 328) AT1G01720 | Symbols: ATAF1, ANAC002 | ATAF1; transcription activator/ transcription factor | chr1:268471-269514 FORWARDmoderately similar to ( 411) NAC48_ORYSA NAC domain-containing protein 48 (ONAC048) - Oryza sativa (Rice)moderately similar to ( 472) loc_os05g34830 12005.m27596 protein NAC domain-containing protein 48, putative, expressed seq=cds; coord=6:147868257.…	5.38145	17.1309
GRMZM5G863420_T01	GRMZM5G863420	response to abiotic stimulus/response to cold	RNA.regulation of transcription.WRKY domain transcription factor family	2.44978	3.47e-15	6.29e-14	weakly similar to ( 134) AT5G64810 | Symbols: WRKY51, ATWRKY51 | WRKY51; transcription factor | chr5:25908415-25909687 FORWARDmoderately similar to ( 219) loc_os05g46020 12005.m08727 protein OsWRKY7 - Superfamily of rice TFs having WRKY and zinc finger domains, expressed seq=cds; coord=6:161477481..161478917:1; parent_gene=GRMZM5G863420	3.46391	16.8371	12.0626
GRMZM2G453571_T01	GRMZM2G453571	response to abiotic stimulus/response to cold/response to wounding	RNA.regulation of transcription.WRKY domain transcription factor family	1.75836	4.14e-08	3.42e-07	weakly similar to ( 156) AT1G29860 | Symbols: WRKY71, ATWRKY71 | WRKY71; transcription factor | chr1:10454482-10455652 FORWARDmoderately similar to ( 218) loc_os05g49100 12005.m08980 protein OsWRKY49 - Superfamily of rice TFs having WRKY and zinc finger domains, expressed seq=cds; coord=6:164799868..164802835:1; parent_gene=GRMZM2G453571	3.2227	9.69345
GRMZM2G158328_T01	GRMZM2G158328	response to DNA damage stimulus	RNA.regulation of transcription.WRKY domain transcription factor family	4.47043	1.13e-101	7.32e-99	weakly similar to ( 166) loc_os01g60600 12001.m12188 protein WRKY DNA binding domain containing protein, expressed seq=cds; coord=3:184849632..184852523:1; parent_gene=GRMZM2G158328	4.10777	81.1253	27.0801
GRMZM2G069102_T04	GRMZM2G069102	response to abiotic stimulus/response to cold	RNA.RNA binding	-4.88594	1.23e-08	1.11e-07	moderately similar to ( 275) AT4G10610 | Symbols: RBP37, ATRBP37 | CID12; RNA binding | chr4:6557336-6559019 FORWARDmoderately similar to ( 305) loc_os08g02330 12008.m04377 protein CID11, putative, expressed seq=cds; coord=4:38021619..38026810:1; parent_gene=GRMZM2G069102	2.80654	0.0844172	12.714
GRMZM2G382534_T01	GRMZM2G382534	response to abiotic stimulus/response to cold	secondary metabolism.isoprenoids.carotenoids.carotenoid beta ring hydroxylase	-1.38009	2.82e-16	5.71e-15	moderately similar to ( 301) AT4G25700 | Symbols: BETA-OHASE 1, B1, chy1 | BETA-OHASE 1 (BETA-HYDROXYLASE 1); carotene beta-ring hydroxylase | chr4:13094965-13095866 REVERSEmoderately similar to ( 349) loc_os03g03370 12003.m34991 protein beta-carotene hydroxylase, putative, expressed seq=cds; coord=9:153692212..153694576:1; parent_gene=GRMZM2G382534	48.3105	16.548	47.1651
AC194970.5_FGT001	AC194970.5	response to abiotic stimulus/response to cold	secondary metabolism.isoprenoids.non-mevalonate pathway.geranylgeranyl pyrophosphate synthase	1.53435	6.38e-17	1.35e-15	moderately similar to ( 362) AT4G36810 | Symbols: GGPS1 | GGPS1 (GERANYLGERANYL PYROPHOSPHATE SYNTHASE 1); farnesyltranstransferase | chr4:17343513-17344628 FORWARDmoderately similar to ( 375) GGPPS_HEVBR Geranylgeranyl pyrophosphate synthetase, chloroplast precursor (GGPP synthetase) [Includes: Dimethylallyltranstransferase (EC 2.5.1.1); Geranyltranstransferase (EC 2.5.1.10); Farnesyltranstransf…	20.6212	53.2641	26.4224
GRMZM2G065899_T02	GRMZM2G065899	response to abiotic stimulus/response to cold	signalling.calcium	-2.15014	7.99e-09	7.33e-08	moderately similar to ( 207) AT4G32060 | Symbols: | calcium-binding EF hand family protein | chr4:15501134-15503302 FORWARDmoderately similar to ( 269) loc_os04g42430 12004.m101567 protein calcium binding atopy-related autoantigen 1, putative, expressed seq=cds; coord=2:31161062..31168259:-1; parent_gene=GRMZM2G065899	10.3602	2.07747	2.91327
GRMZM2G039187_T01	GRMZM2G039187	response to abiotic stimulus/response to cold	signalling.calcium	1.11229	3.96e-08	3.29e-07	weakly similar to ( 157) AT4G14750 | Symbols: IQD19 | IQD19 (IQ-domain 19); calmodulin binding | chr4:8470449-8471903 FORWARDmoderately similar to ( 397) loc_os03g43580 12003.m09404 protein IQ calmodulin-binding motif family protein, expressed seq=cds; coord=1:253133193..253135475:-1; parent_gene=GRMZM2G039187	9.53301	18.3514	49.7801
GRMZM2G033846_T01	GRMZM2G033846	response to abiotic stimulus/response to cold	signalling.calcium	1.39351	3.56e-14	5.92e-13	very weakly similar to (93.6) AT5G49480 | Symbols: ATCP1 | ATCP1 (Ca2+-binding protein 1); calcium ion binding | chr5:20070812-20071294 FORWARDweakly similar to ( 134) loc_os03g19720 12003.m07388 protein caltractin, putative, expressed seq=cds; coord=9:134720446..134721336:-1; parent_gene=GRMZM2G033846	26.2655	61.0528
GRMZM2G459663_T01	GRMZM2G459663	response to abiotic stimulus/response to cold	signalling.calcium	4.40042	2.32e-20	6.46e-19	weakly similar to ( 113) loc_os07g43800 12007.m08605 protein EF hand family protein, expressed seq=cds; coord=7:167817587..167818997:1; parent_gene=GRMZM2G459663	0.564143	10.5885
GRMZM2G158662_T01	GRMZM2G158662	response to DNA damage stimulus	signalling.light	1.66352	4.26e-26	1.72e-24	moderately similar to ( 404) AT2G47590 | Symbols: PHR2 | PHR2 (photolyase/blue-light receptor 2); DNA photolyase | chr2:19521888-19523732 FORWARDmoderately similar to ( 206) CRYD_ORYSA Cryptochrome DASH, chloroplast/mitochondrial precursor - Oryza sativa (Rice)highly similar to ( 726) loc_os03g22330 12003.m07635 protein photolyase/blue-light receptor PHR2, putative, expressed seq=cds; coord=1:574…	20.313	57.423	63.5286
GRMZM2G128315_T01	GRMZM2G128315	response to abiotic stimulus/response to cold	signalling.receptor kinases.DUF 26	1.32785	3.93e-14	6.5e-13	highly similar to ( 760) AT3G56370 | Symbols: | leucine-rich repeat transmembrane protein kinase, putative | chr3:20899403-20902390 REVERSEmoderately similar to ( 278) PSKR_DAUCA Phytosulfokine receptor precursor (EC 2.7.11.1) (Phytosulfokine LRR receptor kinase) - Daucus carota (Carrot)nearly identical (1216) loc_os05g40050 12005.m083754 protein leucine-rich repeat receptor protein kinase EXS pr…	8.42914	18.7933	42.954
GRMZM2G152793_T01	GRMZM2G152793	response to wounding	signalling.receptor kinases.DUF 26	4.82726	1.56e-12	2.18e-11	moderately similar to ( 416) AT5G35370 | Symbols: | ATP binding / carbohydrate binding / kinase/ protein kinase/ protein serine/threonine kinase/ protein tyrosine kinase/ sugar binding | chr5:13588564-13591182 REVERSEmoderately similar to ( 214) KPRO_MAIZE Putative receptor protein kinase ZmPK1 precursor (EC 2.7.11.1) - Zea mays (Maize)nearly identical (1078) loc_os02g52850 12002.m10315 protein A…	0.113878	2.87725
AC233893.1_FGT006	AC233893.1	response to abiotic stimulus/response to cold	signalling.receptor kinases.leucine rich repeat III	1.13102	3.55e-09	3.39e-08	moderately similar to ( 379) AT3G17840 | Symbols: RLK902 | RLK902; ATP binding / kinase/ protein serine/threonine kinase | chr3:6106092-6108430 FORWARDweakly similar to ( 160) PSKR_DAUCA Phytosulfokine receptor precursor (EC 2.7.11.1) (Phytosulfokine LRR receptor kinase) - Daucus carota (Carrot)highly similar to ( 935) loc_os03g12250 12003.m06675 protein atypical receptor-like kinase MARK, putati…	9.42059	18.347	17.2894
GRMZM2G138338_T01	GRMZM2G138338	stress.abiotic.unspecified	signalling.receptor kinases.leucine rich repeat XI	4.50426	4.18e-54	6.18e-52	highly similar to ( 611) AT3G28040 | Symbols: | leucine-rich repeat transmembrane protein kinase, putative | chr3:10435139-10438268 FORWARDmoderately similar to ( 258) RPK1_IPONI Receptor-like protein kinase precursor (EC 2.7.11.1) - Ipomoea nil (Japanese morning glory) (Pharbitis nil)nearly identical (1328) loc_os01g72700 12001.m13304 protein ATP binding protein, putative, expressed seq=cds; coo…	0.645585	13.0491	25.0958
GRMZM2G456669_T01	GRMZM2G456669	stress.abiotic.unspecified	signalling.receptor kinases.leucine rich repeat XI	-1.57953	2.45e-06	1.52e-05	highly similar to ( 716) AT3G47090 | Symbols: | leucine-rich repeat transmembrane protein kinase, putative | chr3:17341512-17344645 REVERSEmoderately similar to ( 413) RPK1_IPONI Receptor-like protein kinase precursor (EC 2.7.11.1) - Ipomoea nil (Japanese morning glory) (Pharbitis nil)nearly identical (1429) loc_os12g42520 12012.m08031 protein receptor-like protein kinase precursor, putative seq=…	4.294	1.27769	10.6569
GRMZM2G148930_T01	GRMZM2G148930	response to wounding	signalling.receptor kinases.misc	3.24491	4.11e-31	2.26e-29	very weakly similar to (95.5) AT5G01740 | Symbols: | FUNCTIONS IN: molecular_function unknown; INVOLVED IN: biological_process unknown; LOCATED IN: cellular_component unknown; EXPRESSED IN: 18 plant structures; EXPRESSED DURING: 9 growth stages; CONTAINS InterPro DOMAIN/s: Wound-induced protein, Wun1 (InterPro:IPR009798); BEST Arabidopsis thaliana protein match is: SAG20 (SENESCENCE ASSOCIATED GE…	3.42221	28.822	3.18721
GRMZM2G135013_T01	GRMZM2G135013	response to wounding	signalling.receptor kinases.S-locus glycoprotein like	1.37233	7.43e-15	1.31e-13	highly similar to ( 540) AT2G19130 | Symbols: | S-locus lectin protein kinase family protein | chr2:8293789-8296275 FORWARDmoderately similar to ( 280) KPRO_MAIZE Putative receptor protein kinase ZmPK1 precursor (EC 2.7.11.1) - Zea mays (Maize)highly similar to ( 783) loc_os04g01310 12004.m05451 protein serine/threonine-protein kinase receptor precursor, putative, expressed seq=cds; coord=2:23287…	9.53891	22.03	6.4931
GRMZM2G456835_T01	GRMZM2G456835	stress.abiotic.cold	stress.abiotic.cold	1.16613	6.27e-09	5.83e-08	weakly similar to ( 143) AT3G17020 | Symbols: | universal stress protein (USP) family protein | chr3:5802728-5804063 REVERSEmoderately similar to ( 207) loc_os05g06500 12005.m05177 protein USP family protein, putative, expressed seq=cds; coord=8:135773274..135780035:1; parent_gene=GRMZM2G456835	6.81104	13.5912	42.2665
GRMZM5G833699_T01	GRMZM5G833699	stress.abiotic.heat	stress.abiotic.heat	-3.6371	2.34e-79	8.95e-77	nearly identical (1063) AT5G52640 | Symbols: HSP81-1, ATHS83, HSP81.1, HSP83, ATHSP90.1 | ATHSP90.1 (HEAT SHOCK PROTEIN 90.1); ATP binding / unfolded protein binding | chr5:21352542-21355147 FORWARDnearly identical (1162) HSP82_MAIZE Heat shock protein 82 - Zea mays (Maize)nearly identical (1084) loc_os04g01740 12004.m05490 protein heat shock protein 82, putative, expressed seq=cds; coord=10:9368…	54.5018	3.9008
GRMZM2G024668_T01	GRMZM2G024668	stress.abiotic.heat	stress.abiotic.heat	1.89356	6.51e-25	2.43e-23	highly similar to ( 561) AT5G56030 | Symbols: HSP81-2, ERD8, HSP90.2 | HSP81-2 (HEAT SHOCK PROTEIN 81-2); ATP binding | chr5:22686923-22689433 FORWARDhighly similar to ( 585) HSP81_ORYSA Heat shock protein 81-1 (HSP81-1) (Heat shock protein 82) - Oryza sativa (Rice)highly similar to ( 585) loc_os08g39140 12008.m080203 protein heat shock protein 81-1, putative, expressed seq=cds; coord=1:184242132…	7.86641	25.9897	5.75127
GRMZM2G059799_T01	GRMZM2G059799	stress.abiotic.unspecified	stress.abiotic.unspecified	-1.86625	2.02e-06	1.27e-05	weakly similar to ( 130) AT1G68300 | Symbols: | universal stress protein (USP) family protein | chr1:25598518-25599261 REVERSEmoderately similar to ( 206) loc_os01g32780 12001.m09597 protein ethylene-responsive protein, putative, expressed seq=cds; coord=3:210064862..210066253:1; parent_gene=GRMZM2G059799	11.6874	2.85034	5.11625
GRMZM2G106690_T01	GRMZM2G106690	stress.abiotic.unspecified	stress.abiotic.unspecified	1.13035	6.11e-14	9.91e-13	moderately similar to ( 225) AT1G11360 | Symbols: | universal stress protein (USP) family protein | chr1:3822171-3822899 REVERSEmoderately similar to ( 330) loc_os01g57450 12001.m11896 protein USP family protein, putative, expressed seq=cds; coord=8:171885210..171889098:1; parent_gene=GRMZM2G106690	38.2958	74.5107	110.986
GRMZM5G887068_T01	GRMZM5G887068	stress.abiotic.unspecified	stress.abiotic.unspecified	1.93866	1.79e-08	1.57e-07	weakly similar to ( 180) AT1G44760 | Symbols: | universal stress protein (USP) family protein | chr1:16896894-16898427 REVERSEmoderately similar to ( 254) loc_os05g35380 12005.m07768 protein universal stress protein family protein, expressed seq=cds; coord=8:102135988..102138900:1; parent_gene=GRMZM5G887068	2.72916	9.3035	24.6348
GRMZM2G149809_T01	GRMZM2G149809	response to abiotic stimulus/response to cold	stress.biotic	1.43734	1.02e-07	7.91e-07	moderately similar to ( 285) AT1G20030 | Symbols: | pathogenesis-related thaumatin family protein | chr1:6945850-6947017 FORWARDmoderately similar to ( 210) TLP1_PRUPE Thaumatin-like protein 1 precursor (PpAZ44) - Prunus persica (Peach)moderately similar to ( 374) loc_os03g14050 12003.m34813 protein thaumatin-like protein 1 precursor, putative, expressed seq=cds; coord=9:143036859..143040005:-1; …	4.13404	9.94773	8.53404
GRMZM2G002656_T01	GRMZM2G002656	stress.biotic	stress.biotic	-1.66291	2.13e-26	8.79e-25	moderately similar to ( 247) AT3G46730 | Symbols: | disease resistance protein (CC-NBS class), putative | chr3:17213069-17215612 REVERSEmoderately similar to ( 478) loc_os11g37880 12011.m07634 protein stripe rust resistance protein Yr10, putative, expressed seq=cds; coord=6:128823409..128833681:-1; parent_gene=GRMZM2G002656	21.7698	6.11748	59.5675
AC230011.2_FGT002	AC230011.2	stress.biotic	stress.biotic	-2.66735	2.68e-12	3.67e-11	moderately similar to ( 253) AT3G14470 | Symbols: | disease resistance protein (NBS-LRR class), putative | chr3:4857940-4861104 FORWARDhighly similar to ( 985) loc_os01g35254 12001.m09827 protein transposon protein, putative, CACTA, En/Spm sub-class seq=cds; coord=3:113896010..113902317:-1; parent_gene=AC230011.2_FG002	3.70821	0.51979	11.1159
GRMZM5G819919_T01	GRMZM5G819919	stress.biotic	stress.biotic	-2.53377	2.64e-06	1.62e-05	weakly similar to ( 102) AT3G46710 | Symbols: | disease resistance protein (CC-NBS-LRR class), putative | chr3:17206489-17209032 REVERSEmoderately similar to ( 294) loc_os08g07330 12008.m26591 protein RGH1A, putative, expressed seq=cds; coord=10:2842742..2846127:1; parent_gene=GRMZM5G819919	2.40439	0.369298	12.5325
GRMZM2G077068_T01	GRMZM2G077068	stress.biotic	stress.biotic	-1.91704	2.99e-17	6.51e-16	moderately similar to ( 226) AT3G07040 | Symbols: RPM1, RPS3 | RPM1 (RESISTANCE TO P. SYRINGAE PV MACULICOLA 1); nucleotide binding / protein binding | chr3:2226244-2229024 REVERSEhighly similar to ( 782) loc_os02g18510 12002.m07094 protein stripe rust resistance protein Yr10, putative seq=cds; coord=1:221236143..221241717:-1; parent_gene=GRMZM2G077068	12.2291	2.88919	29.6214
GRMZM2G173647_T01	GRMZM2G173647	stress.biotic	stress.biotic	1.12933	8.02e-14	1.28e-12	moderately similar to ( 452) AT4G26090 | Symbols: RPS2 | RPS2 (RESISTANT TO P. SYRINGAE 2); protein binding | chr4:13224596-13227325 FORWARDnearly identical (1441) loc_os01g57870 12001.m150747 protein disease resistance protein RPS2, putative, expressed seq=cds; coord=3:189774217..189777798:1; parent_gene=GRMZM2G173647	15.4223	29.9987	22.766
GRMZM2G032602_T01	GRMZM2G032602	stress.biotic	stress.biotic	1.12976	4.14e-15	7.45e-14	moderately similar to ( 351) AT4G26090 | Symbols: RPS2 | RPS2 (RESISTANT TO P. SYRINGAE 2); protein binding | chr4:13224596-13227325 FORWARDnearly identical (1111) loc_os04g43440 12004.m09307 protein NB-ARC domain containing protein, expressed seq=cds; coord=2:28929571..28933965:-1; parent_gene=GRMZM2G032602	20.747	40.3575	4.14335
GRMZM2G050959_T01	GRMZM2G050959	stress.biotic	stress.biotic	1.4695	8.08e-19	2.01e-17	moderately similar to ( 275) AT3G07040 | Symbols: RPM1, RPS3 | RPM1 (RESISTANCE TO P. SYRINGAE PV MACULICOLA 1); nucleotide binding / protein binding | chr3:2226244-2229024 REVERSEhighly similar to ( 776) loc_os11g11960 12011.m05388 protein NBS-LRR type disease resistance protein, putative, expressed seq=cds; coord=4:189294131..189297207:-1; parent_gene=GRMZM2G050959	10.8652	26.7674
GRMZM5G827121_T01	GRMZM5G827121	Additional file 13 stress.biotic	stress.biotic	1.59392	7.22e-11	8.48e-10	weakly similar to ( 189) AT3G07040 | Symbols: RPM1, RPS3 | RPM1 (RESISTANCE TO P. SYRINGAE PV MACULICOLA 1); nucleotide binding / protein binding | chr3:2226244-2229024 REVERSEhighly similar to ( 750) loc_os09g34160 12009.m06465 protein resistance protein, putative, expressed seq=cds; coord=7:140327135..140328979:-1; parent_gene=GRMZM5G827121	5.26356	14.1191	1.74701
GRMZM2G136513_T01	GRMZM2G136513	stress.biotic	stress.biotic	1.65262	6.34e-13	9.28e-12	moderately similar to ( 318) AT4G26090 | Symbols: RPS2 | RPS2 (RESISTANT TO P. SYRINGAE 2); protein binding | chr4:13224596-13227325 FORWARDnearly identical (1303) loc_os03g14900 12003.m06927 protein disease resistance protein RPS2, putative, expressed seq=cds; coord=1:35132532..35136898:-1; parent_gene=GRMZM2G136513	3.49082	9.76051	23.2436
GRMZM2G047152_T01	GRMZM2G047152	stress.biotic	stress.biotic	1.66196	1.15e-13	1.81e-12	moderately similar to ( 379) AT3G14470 | Symbols: | disease resistance protein (NBS-LRR class), putative | chr3:4857940-4861104 FORWARDnearly identical (1194) loc_os05g34220 12005.m27824 protein disease resistance protein, putative, expressed seq=cds; coord=8:104460886..104464505:-1; parent_gene=GRMZM2G047152	3.25439	9.15383	12.1094
GRMZM2G091088_T01	GRMZM2G091088	stress.biotic	stress.biotic	1.80102	5.12e-20	1.39e-18	moderately similar to ( 236) AT3G07040 | Symbols: RPM1, RPS3 | RPM1 (RESISTANCE TO P. SYRINGAE PV MACULICOLA 1); nucleotide binding / protein binding | chr3:2226244-2229024 REVERSEhighly similar to ( 842) loc_os01g23380 12001.m08812 protein stripe rust resistance protein Yr10, putative, expressed seq=cds; coord=3:61339824..61342588:-1; parent_gene=GRMZM2G091088	6.29135	19.4642	11.3426
GRMZM2G176403_T01	GRMZM2G176403	stress.biotic	stress.biotic	2.36192	8.19e-12	1.07e-10	weakly similar to ( 105) AT3G46730 | Symbols: | disease resistance protein (CC-NBS class), putative | chr3:17213069-17215612 REVERSEmoderately similar to ( 321) loc_os12g09710 12012.m04955 protein NBS-LRR disease resistance protein, putative seq=cds; coord=7:140258657..140259754:1; parent_gene=GRMZM2G176403	2.89984	13.258
GRMZM2G112538_T01	GRMZM2G112538	stress.biotic	stress.biotic	3.02122	1.15e-06	7.49e-06	weakly similar to ( 167) PR1_ASPOF Pathogenesis-related protein 1 (AOPR1) - Asparagus officinalis (Garden asparagus)moderately similar to ( 280) loc_os03g18850 12003.m07305 protein pathogenesis-related protein 1, putative, expressed seq=cds; coord=1:47149321..47150335:1; parent_gene=GRMZM2G112538	0.869002	6.27323
GRMZM2G045027_T01	GRMZM2G045027	stress.biotic.PR-proteins	stress.biotic.PR-proteins	3.53642	1.28e-25	4.97e-24	moderately similar to ( 350) AT3G14470 | Symbols: | disease resistance protein (NBS-LRR class), putative | chr3:4857940-4861104 FORWARDhighly similar to ( 728) loc_os10g36270 12010.m06438 protein disease resistance RPP13-like protein 1, putative, expressed seq=cds; coord=1:225341943..225345923:-1; parent_gene=GRMZM2G045027	0.6266	6.46194
GRMZM2G039396_T01	GRMZM2G039396	response to abiotic stimulus/response to cold	tetrapyrrole synthesis.protoporphyrin IX oxidase	-1.45681	5.21e-10	5.5e-09	highly similar to ( 724) AT4G01690 | Symbols: PPOX, HEMG1, PPO1 | PPOX; protoporphyrinogen oxidase | chr4:729929-732309 FORWARDhighly similar to ( 720) PPOC_TOBAC Protoporphyrinogen oxidase, chloroplast precursor (EC 1.3.3.4) (PPO I) (Protoporphyrinogen IX oxidase isozyme I) (PPX I) - Nicotiana tabacum (Common tobacco)highly similar to ( 856) loc_os01g18320 12001.m08374 protein protoporphyrinogen…	15.4377	5.00064	28.9265
GRMZM2G420119_T01	GRMZM2G420119	response to abiotic stimulus/response to cold	transport.metabolite transporters at the mitochondrial membrane	-1.31644	2e-10	2.24e-09	moderately similar to ( 393) AT1G14560 | Symbols: | mitochondrial substrate carrier family protein | chr1:4981300-4983082 FORWARDweakly similar to ( 122) BT1_MAIZE Protein brittle-1, chloroplast precursor - Zea mays (Maize)highly similar to ( 550) loc_os01g38990 12001.m43063 protein Grave disease carrier protein, putative, expressed seq=cds; coord=8:139592349..139595685:-1; parent_gene=GRMZM2G420…	20.4666	7.29937	61.6382
GRMZM2G043182_T01	GRMZM2G043182	response to abiotic stimulus/response to cold	transport.metabolite transporters at the mitochondrial membrane	1.00332	1.12e-06	7.33e-06	moderately similar to ( 270) AT1G72820 | Symbols: | mitochondrial substrate carrier family protein | chr1:27403457-27404506 FORWARDmoderately similar to ( 371) loc_os10g25830 12010.m05527 protein mitochondrial carrier-like protein, putative, expressed seq=cds; coord=5:35709682..35711264:1; parent_gene=GRMZM2G043182	12.2695	21.9009	42.0467
GRMZM2G047457_T01	GRMZM2G047457	response to abiotic stimulus/response to cold	transport.metabolite transporters at the mitochondrial membrane	1.04927	3.5e-07	2.49e-06	moderately similar to ( 273) AT5G42130 | Symbols: | mitochondrial substrate carrier family protein | chr5:16835572-16836810 REVERSEvery weakly similar to (86.3) BT1_MAIZE Protein brittle-1, chloroplast precursor - Zea mays (Maize)moderately similar to ( 415) loc_os01g73420 12001.m13370 protein mitochondrial RNA-splicing protein MRS3, putative, expressed seq=cds; coord=3:146026143..146027787:-1; p…	11.3231	20.8426	22.4353
GRMZM2G081652_T01	GRMZM2G081652	response to abiotic stimulus/response to cold	transport.misc	1.85087	8.07e-46	9.5e-44	moderately similar to ( 402) AT4G09160 | Symbols: | SEC14 cytosolic factor family protein / phosphoglyceride transfer family protein | chr4:5839761-5842158 FORWARDhighly similar to ( 650) loc_os01g65380 12001.m12651 protein patellin-5, putative, expressed seq=cds; coord=3:173472565..173475730:-1; parent_gene=GRMZM2G081652	53.1765	170.295	104.938
